# Supplementary material for: An excitatory lateral hypothalamic circuit orchestrating pain behaviors in mice
Source: eLife. 2021 May 27;10:e66446. doi: 10.7554/eLife.66446 (PMC8159376; doi:10.7554/eLife.66446)
Supplement: Figure 1—figure supplement 1—source data 1. [file elife-66446-fig1-figsupp1-data1.xlsx]

## Sheet: Hotplate Cluster 1 hot
0.17955	-0.75444	-0.55688	-0.5763	-0.54585	0.112248	-0.54074	-0.40577	-0.58214	-0.74443	-0.61472	-0.25114	-0.99767	-0.52474	-0.61622	-0.20692	-0.77539	0.192578	-0.37602	-0.34981	-0.06622	-0.63091	-0.05345	-0.37592	-0.31089	-0.05405	-0.1539	0.170793	-0.58979	-0.43706	-0.37965	-0.18328	0.212718	0.621969	0.01337
0.16724	-0.74598	-0.56841	-0.59098	-0.54427	0.131469	-0.54978	-0.41457	-0.58169	-0.73239	-0.6081	-0.22077	-0.97925	-0.50508	-0.62242	-0.18989	-0.78605	0.173533	-0.36381	-0.33894	-0.07175	-0.63491	-0.09603	-0.36449	-0.36906	-0.05354	-0.16247	0.128274	-0.61541	-0.39732	-0.42727	-0.16305	0.183099	0.689244	0.001093
0.164106	-0.74875	-0.5851	-0.63389	-0.50044	0.155987	-0.51608	-0.33968	-0.53963	-0.73822	-0.58933	-0.2502	-0.95209	-0.46966	-0.64378	-0.18461	-0.76446	0.148822	-0.34207	-0.40617	-0.10883	-0.62015	-0.12459	-0.40568	-0.42733	-0.06232	-0.17339	0.074912	-0.5996	-0.39254	-0.4239	-0.22146	0.165465	0.811608	0.030115
0.24984	-0.75551	-0.58637	-0.59026	-0.50245	0.132959	-0.4934	-0.30763	-0.54609	-0.75352	-0.56743	-0.26574	-0.92405	-0.47558	-0.68089	-0.21358	-0.74576	0.116125	-0.33469	-0.50606	-0.09369	-0.61097	-0.19618	-0.42817	-0.48892	-0.15937	-0.14993	0.111795	-0.57056	-0.37599	-0.46723	-0.20275	0.128065	0.824775	0.013077
0.250637	-0.77063	-0.5805	-0.55049	-0.48803	0.098568	-0.49254	-0.31784	-0.55493	-0.74715	-0.55543	-0.25294	-0.91134	-0.46725	-0.71049	-0.17833	-0.72598	0.133625	-0.31665	-0.45334	-0.08164	-0.60712	-0.28581	-0.40063	-0.47225	-0.21644	-0.16412	0.127488	-0.58258	-0.38283	-0.47483	-0.19712	0.108662	0.811432	0.02532
0.257046	-0.79257	-0.56929	-0.50998	-0.4841	0.066516	-0.50099	-0.36367	-0.58546	-0.74134	-0.55875	-0.22014	-0.91732	-0.48177	-0.71776	-0.18716	-0.70336	0.150618	-0.31782	-0.42358	-0.07396	-0.62305	-0.37763	-0.38455	-0.52688	-0.18131	-0.13392	0.132072	-0.58301	-0.36395	-0.55022	-0.13756	0.071289	0.771782	0.006343
0.196163	-0.7885	-0.58368	-0.52941	-0.47985	0.088705	-0.53051	-0.36788	-0.59855	-0.74973	-0.54673	-0.25133	-0.9281	-0.5012	-0.71821	-0.20236	-0.71714	0.17752	-0.32483	-0.24992	-0.09569	-0.65147	-0.31271	-0.42578	-0.51506	-0.00795	-0.11076	0.135543	-0.59246	-0.36537	-0.58772	-0.07369	0.095313	0.735249	0.020681
0.2057	-0.78239	-0.59015	-0.54107	-0.45271	0.088891	-0.51841	-0.41478	-0.60761	-0.76749	-0.5483	-0.27944	-0.92967	-0.53525	-0.71226	-0.23359	-0.65998	0.187059	-0.36824	-0.28883	-0.10841	-0.66355	-0.32062	-0.50095	-0.4532	0.108094	-0.10719	0.199572	-0.56683	-0.37007	-0.60421	-0.03386	0.089397	0.802017	0.079747
0.200623	-0.77756	-0.58823	-0.57512	-0.49039	0.117331	-0.5176	-0.44731	-0.58011	-0.75384	-0.54009	-0.3194	-0.92441	-0.53837	-0.70779	-0.22805	-0.62125	0.167088	-0.37965	-0.2698	-0.09507	-0.67366	-0.35828	-0.5407	-0.35877	0.045007	-0.10858	0.268929	-0.56843	-0.36997	-0.57048	-0.02206	0.078813	0.886427	0.1082
0.170158	-0.8057	-0.56964	-0.604	-0.50519	0.119624	-0.51177	-0.4859	-0.58486	-0.73803	-0.55594	-0.34721	-0.9259	-0.53063	-0.69901	-0.19325	-0.54192	0.168376	-0.35634	-0.35769	-0.09401	-0.6681	-0.4273	-0.52929	-0.28456	-0.00911	-0.1065	0.290879	-0.58577	-0.40578	-0.50871	-0.12767	-0.00184	0.889009	0.105675
0.172769	-0.82304	-0.56223	-0.57881	-0.52255	0.120898	-0.47689	-0.45921	-0.58832	-0.721	-0.57679	-0.36991	-0.93811	-0.5123	-0.69219	-0.16751	-0.55062	0.147553	-0.31907	-0.35162	-0.10609	-0.68515	-0.48228	-0.51208	-0.36384	-0.00766	-0.10909	0.376803	-0.59175	-0.38857	-0.50327	-0.15953	-0.0106	0.856527	0.05066
0.17077	-0.83818	-0.55136	-0.54474	-0.54245	0.099027	-0.4838	-0.49998	-0.60305	-0.75567	-0.58826	-0.36586	-0.94802	-0.51409	-0.66762	-0.18742	-0.54544	0.191703	-0.30854	-0.34445	-0.13388	-0.6662	-0.49087	-0.52029	-0.40943	0.099869	-0.11724	0.44912	-0.60231	-0.42138	-0.49879	-0.18923	0.009428	0.776211	0.024586
0.175395	-0.82273	-0.57114	-0.52476	-0.5688	0.067532	-0.437	-0.50055	-0.57757	-0.76011	-0.59172	-0.41626	-0.96335	-0.51382	-0.61231	-0.19983	-0.55427	0.141222	-0.29676	-0.33879	-0.12663	-0.65871	-0.53826	-0.47223	-0.43939	0.040454	-0.12993	0.457829	-0.61214	-0.43342	-0.50913	-0.15436	0.044066	0.775698	0.047976
0.143746	-0.81089	-0.57199	-0.56804	-0.63492	0.041989	-0.43196	-0.52824	-0.57623	-0.75635	-0.5513	-0.47927	-0.96911	-0.50342	-0.53976	-0.25517	-0.50904	0.078325	-0.28404	-0.36479	-0.10581	-0.64686	-0.4695	-0.50069	-0.41182	0.011099	-0.09275	0.363408	-0.64249	-0.51398	-0.48737	-0.21641	-0.03364	0.762711	0.038802
0.124373	-0.80389	-0.59934	-0.59616	-0.62493	0.030221	-0.41544	-0.46189	-0.58926	-0.74063	-0.55708	-0.55442	-0.96618	-0.47998	-0.49308	-0.26435	-0.46072	-0.04936	-0.24338	-0.41733	-0.0918	-0.66077	-0.42941	-0.53521	-0.34751	-0.03121	-0.07913	0.273363	-0.64379	-0.55548	-0.43153	-0.23987	-0.11634	0.736472	0.09663
0.09396	-0.8183	-0.58886	-0.59643	-0.64895	0.034133	-0.4419	-0.44807	-0.58311	-0.7248	-0.55014	-0.53845	-0.95497	-0.47173	-0.49633	-0.25345	-0.42789	-0.07018	-0.26898	-0.37751	-0.09582	-0.68052	-0.35324	-0.60806	-0.30318	-0.03418	-0.09838	0.216852	-0.62782	-0.55083	-0.42807	-0.23284	-0.14285	0.637022	0.087964
0.068622	-0.82141	-0.60736	-0.57813	-0.62713	0.03715	-0.49428	-0.38974	-0.596	-0.73103	-0.57783	-0.55903	-0.94787	-0.49245	-0.53365	-0.22342	-0.39722	-0.05791	-0.28709	-0.32464	-0.10739	-0.70331	-0.2538	-0.59229	-0.20573	-0.07749	-0.13199	0.173585	-0.59185	-0.47958	-0.4029	-0.1869	-0.12862	0.554924	0.110309
0.075403	-0.80506	-0.60139	-0.59002	-0.62977	0.033847	-0.5158	-0.39531	-0.59429	-0.72871	-0.58453	-0.5665	-0.94909	-0.49083	-0.55799	-0.17378	-0.4149	-0.01558	-0.33119	-0.37788	-0.09568	-0.721	-0.24913	-0.54348	-0.19395	-0.09711	-0.1644	0.126023	-0.57526	-0.43779	-0.45163	-0.10752	-0.08911	0.499523	0.082716
0.087113	-0.79931	-0.60159	-0.6354	-0.59404	0.024823	-0.5653	-0.37948	-0.61732	-0.75261	-0.58266	-0.58533	-0.94781	-0.45755	-0.55617	-0.17895	-0.45524	-0.02476	-0.31558	-0.4233	-0.10487	-0.73953	-0.25817	-0.55941	-0.25312	-0.04581	-0.15404	0.134142	-0.57039	-0.42455	-0.49681	-0.07214	-0.00938	0.543427	0.042244
0.088714	-0.79296	-0.57859	-0.67157	-0.58565	0.028847	-0.5318	-0.44257	-0.58407	-0.75641	-0.58894	-0.58828	-0.9392	-0.39725	-0.56524	-0.17208	-0.44252	-0.07754	-0.33629	-0.52747	-0.07358	-0.74363	-0.34012	-0.60526	-0.28387	-0.03267	-0.13664	0.069335	-0.56406	-0.41981	-0.47646	-0.07726	0.066973	0.501098	0.06606
0.069247	-0.78307	-0.57377	-0.64227	-0.56024	0.010374	-0.57189	-0.40206	-0.54278	-0.75711	-0.5811	-0.59923	-0.93055	-0.38168	-0.56825	-0.18684	-0.42003	-0.07105	-0.32237	-0.44491	-0.11589	-0.76016	-0.32185	-0.60477	-0.28116	-0.08534	-0.11208	0.088419	-0.61068	-0.35784	-0.42107	-0.12582	0.140465	0.585069	0.131592
0.050039	-0.75798	-0.57618	-0.61505	-0.57156	0.034566	-0.59051	-0.38549	-0.52046	-0.74652	-0.59349	-0.62239	-0.94774	-0.39406	-0.59126	-0.16181	-0.34127	-0.04959	-0.33296	-0.42113	-0.10815	-0.76331	-0.33264	-0.54591	-0.20686	-0.11855	-0.10676	0.063214	-0.69321	-0.30783	-0.35098	-0.1377	0.109942	0.522164	0.20933
0.052396	-0.75152	-0.59122	-0.62437	-0.55627	0.028328	-0.65524	-0.38083	-0.53165	-0.75457	-0.57088	-0.59844	-0.97946	-0.43127	-0.62475	-0.1774	-0.41293	-0.02675	-0.34182	-0.35599	-0.12528	-0.76874	-0.35776	-0.49754	-0.25247	-0.05757	-0.08707	0.108635	-0.73989	-0.28829	-0.41233	-0.12288	0.138836	0.538891	0.20016
0.054476	-0.74679	-0.59732	-0.64257	-0.58291	0.056629	-0.66409	-0.41942	-0.51669	-0.73568	-0.6012	-0.54355	-0.98506	-0.45463	-0.615	-0.14766	-0.44032	-0.03902	-0.34797	-0.3374	-0.0884	-0.77893	-0.37682	-0.51431	-0.26682	-0.07289	-0.07702	0.108267	-0.72231	-0.33214	-0.47146	-0.11921	0.07448	0.544118	0.172786
0.074494	-0.73448	-0.59965	-0.67243	-0.59038	0.059293	-0.66342	-0.45888	-0.49468	-0.73186	-0.59012	-0.47721	-0.97077	-0.45561	-0.61174	-0.14551	-0.47561	-0.03302	-0.32993	-0.42235	-0.08646	-0.79023	-0.42975	-0.56366	-0.28611	-0.04539	-0.09057	0.134345	-0.66159	-0.35675	-0.49258	-0.10003	0.07848	0.563308	0.193997
0.095036	-0.74056	-0.60445	-0.67094	-0.59168	0.095384	-0.64124	-0.4526	-0.47264	-0.72885	-0.59847	-0.42538	-0.96082	-0.46628	-0.58557	-0.12316	-0.44925	-0.00588	-0.32517	-0.47408	-0.10913	-0.7907	-0.4451	-0.59056	-0.30758	-0.03927	-0.124	0.19028	-0.61834	-0.36128	-0.49503	-0.10419	0.024793	0.634189	0.223081
0.079811	-0.74869	-0.60587	-0.70584	-0.56352	0.110756	-0.61602	-0.45295	-0.49962	-0.74843	-0.54904	-0.39998	-0.97027	-0.45564	-0.63691	-0.12241	-0.46502	-0.05822	-0.35373	-0.57108	-0.138	-0.7832	-0.43649	-0.62578	-0.32621	-0.03486	-0.17155	0.277766	-0.58928	-0.33281	-0.52	-0.06637	0.051857	0.572887	0.236187
0.05993	-0.75735	-0.61439	-0.71546	-0.52634	0.129288	-0.60131	-0.39078	-0.53195	-0.75452	-0.55742	-0.40486	-0.97025	-0.49067	-0.64597	-0.13856	-0.48403	-0.05609	-0.41439	-0.49519	-0.13131	-0.75567	-0.38649	-0.60038	-0.35765	-0.0654	-0.14156	0.317274	-0.55332	-0.29973	-0.57212	-0.03141	-0.00475	0.532287	0.19407
0.053587	-0.7401	-0.61532	-0.69481	-0.52274	0.121106	-0.62567	-0.36913	-0.51949	-0.74974	-0.54913	-0.42273	-0.96618	-0.50054	-0.64095	-0.10654	-0.46045	-0.02856	-0.40644	-0.45325	-0.13163	-0.7395	-0.35579	-0.58874	-0.37522	-0.08341	-0.14009	0.36579	-0.5659	-0.3026	-0.59941	0.003631	-0.03513	0.434941	0.185831
0.053254	-0.73926	-0.62054	-0.68729	-0.54543	0.120562	-0.63298	-0.36552	-0.50903	-0.73829	-0.53996	-0.46838	-0.95011	-0.55202	-0.63034	-0.09551	-0.44501	0.050087	-0.41158	-0.35986	-0.13669	-0.72588	-0.39649	-0.57895	-0.38618	-0.06749	-0.09571	0.310685	-0.54415	-0.33675	-0.60898	-0.02073	-0.03494	0.425336	0.157482
0.085241	-0.74311	-0.61695	-0.6684	-0.53512	0.107398	-0.63889	-0.48795	-0.45834	-0.73132	-0.51062	-0.50585	-0.95237	-0.54604	-0.6209	-0.04736	-0.44088	0.132757	-0.36328	-0.34589	-0.17108	-0.72561	-0.40757	-0.53902	-0.42481	-0.04055	-0.08104	0.326757	-0.5482	-0.3508	-0.64915	-0.04533	-0.03859	0.385951	0.139959
0.087781	-0.74948	-0.61612	-0.66504	-0.54896	0.089463	-0.59901	-0.56258	-0.44874	-0.71976	-0.50368	-0.47636	-0.95567	-0.55715	-0.624	-0.02621	-0.45747	0.12116	-0.36337	-0.38094	-0.19586	-0.726	-0.43082	-0.51802	-0.40337	-0.11693	-0.07181	0.306127	-0.55461	-0.35142	-0.64319	-0.13237	-0.11805	0.366296	0.0835
0.101232	-0.74584	-0.61726	-0.62705	-0.54739	0.065911	-0.57097	-0.59086	-0.45188	-0.72736	-0.49503	-0.44655	-0.95747	-0.52699	-0.60786	-0.08351	-0.45687	0.116058	-0.34336	-0.4801	-0.17812	-0.71526	-0.45385	-0.46886	-0.45253	-0.06362	-0.04598	0.351825	-0.56371	-0.33429	-0.6541	-0.11663	-0.17878	0.312341	0.09607
0.042359	-0.74901	-0.62077	-0.62269	-0.56159	0.071771	-0.54681	-0.581	-0.45939	-0.75134	-0.43332	-0.44911	-0.95831	-0.51717	-0.59106	-0.12764	-0.40066	0.064689	-0.36787	-0.52222	-0.17565	-0.6989	-0.40246	-0.44351	-0.41357	-0.05224	-0.08823	0.322425	-0.55242	-0.34884	-0.6508	-0.10549	-0.20304	0.369292	0.125199
0.055085	-0.7501	-0.63302	-0.65406	-0.5783	0.07189	-0.57725	-0.51402	-0.47137	-0.80062	-0.3401	-0.48748	-0.95661	-0.49367	-0.56642	-0.18125	-0.35679	0.035824	-0.35812	-0.51713	-0.13735	-0.68806	-0.35415	-0.41624	-0.44182	0.001885	-0.05713	0.262997	-0.53605	-0.36575	-0.64921	-0.06698	-0.12425	0.293802	0.12598
0.041745	-0.74685	-0.63019	-0.70086	-0.58385	0.085637	-0.58784	-0.49688	-0.44281	-0.83115	-0.27191	-0.53611	-0.97867	-0.46857	-0.54564	-0.1421	-0.30996	0.071363	-0.36869	-0.43342	-0.17025	-0.68145	-0.27035	-0.42168	-0.39063	-0.02643	-0.11663	0.191936	-0.55947	-0.3782	-0.62347	-0.11909	-0.18145	0.291484	0.094677
0.067396	-0.74482	-0.63477	-0.71365	-0.60813	0.072264	-0.60808	-0.4487	-0.45002	-0.83642	-0.23687	-0.57074	-0.99085	-0.44921	-0.5222	-0.11656	-0.35009	0.03393	-0.35649	-0.44037	-0.17304	-0.66477	-0.36279	-0.45223	-0.43089	-0.11934	-0.11307	0.173741	-0.56546	-0.37376	-0.55366	-0.17228	-0.20344	0.223982	0.071638
0.031453	-0.73442	-0.64218	-0.6767	-0.58655	0.074917	-0.57538	-0.45727	-0.41196	-0.83256	-0.19502	-0.60801	-0.99939	-0.44372	-0.51455	-0.02952	-0.38161	0.021206	-0.37053	-0.43687	-0.25126	-0.66438	-0.32112	-0.52701	-0.42243	-0.12374	-0.18344	0.2108	-0.60423	-0.344	-0.55321	-0.15073	-0.2235	0.311672	0.097711
0.022503	-0.73942	-0.66822	-0.65075	-0.59568	0.063905	-0.55692	-0.45129	-0.41175	-0.83165	-0.2012	-0.62861	-0.98954	-0.46179	-0.50426	-0.00873	-0.40761	-0.0301	-0.36719	-0.47355	-0.26961	-0.66616	-0.33607	-0.56698	-0.49865	-0.17647	-0.17334	0.257426	-0.61641	-0.33621	-0.52239	-0.16558	-0.10738	0.289264	0.091205
0.05574	-0.7329	-0.68146	-0.62274	-0.61228	0.051243	-0.51143	-0.44162	-0.40397	-0.85528	-0.20638	-0.62095	-0.99485	-0.46353	-0.52998	-0.0158	-0.39822	-0.04999	-0.37237	-0.4991	-0.30613	-0.67951	-0.24299	-0.63462	-0.52805	-0.15324	-0.15852	0.290362	-0.65876	-0.33114	-0.52589	-0.12821	-0.01501	0.286306	0.059422
0.051932	-0.72393	-0.68906	-0.64808	-0.64453	0.038263	-0.55826	-0.45295	-0.44354	-0.85381	-0.24635	-0.63669	-0.98728	-0.43449	-0.53707	-0.07478	-0.40972	-0.05767	-0.38029	-0.39922	-0.26702	-0.69925	-0.25794	-0.62999	-0.54272	-0.12818	-0.15528	0.283132	-0.67849	-0.35052	-0.46534	-0.12288	0.020131	0.172225	0.070487
0.075833	-0.71175	-0.67965	-0.6586	-0.629	0.029777	-0.63156	-0.42109	-0.48806	-0.8585	-0.23194	-0.64552	-0.98912	-0.40289	-0.52385	-0.06835	-0.4107	-0.07358	-0.38984	-0.3488	-0.26221	-0.71891	-0.2215	-0.56311	-0.523	-0.12003	-0.16495	0.220738	-0.67248	-0.30494	-0.44862	-0.04773	0.012977	0.160875	0.105134
0.050854	-0.71178	-0.6703	-0.66548	-0.62512	0.025259	-0.66211	-0.41448	-0.49206	-0.84602	-0.21234	-0.65402	-0.98312	-0.37285	-0.4879	-0.02612	-0.4017	-0.04964	-0.43967	-0.26421	-0.25156	-0.74301	-0.20088	-0.54759	-0.48386	-0.13171	-0.15877	0.159042	-0.63732	-0.25124	-0.398	-0.07937	0.01561	0.157686	0.205109
0.054696	-0.7151	-0.66281	-0.66204	-0.62694	0.014216	-0.65798	-0.38783	-0.48157	-0.85948	-0.20422	-0.70982	-1.0053	-0.38081	-0.47628	0.024106	-0.41762	-0.073	-0.45393	-0.28949	-0.24808	-0.7396	-0.18278	-0.55749	-0.46242	-0.22821	-0.13445	0.126658	-0.61716	-0.19009	-0.43122	-0.03562	0.056453	0.208753	0.268503
0.044048	-0.72774	-0.66649	-0.64619	-0.66609	0.004951	-0.60248	-0.39155	-0.45933	-0.8533	-0.19499	-0.69655	-1.02441	-0.38041	-0.47109	0.061837	-0.44237	-0.06674	-0.44191	-0.26472	-0.19602	-0.75217	-0.14377	-0.61217	-0.39812	-0.22152	-0.11959	0.109744	-0.58916	-0.21739	-0.4359	-0.08468	0.133895	0.146491	0.312078
0.024989	-0.72334	-0.67498	-0.62879	-0.68126	0.00063	-0.5992	-0.37996	-0.45069	-0.83691	-0.20649	-0.69933	-1.03928	-0.39768	-0.45919	0.072635	-0.44766	-0.06962	-0.3816	-0.22839	-0.19029	-0.75952	-0.14253	-0.58666	-0.39059	-0.26707	-0.13538	0.111848	-0.56026	-0.2377	-0.46907	-0.06976	0.145972	0.104935	0.28177
-0.00949	-0.72528	-0.67372	-0.62839	-0.70347	0.014375	-0.56509	-0.36024	-0.44369	-0.82393	-0.22649	-0.66314	-1.05655	-0.40418	-0.46142	0.058876	-0.41945	-0.04859	-0.32375	-0.17273	-0.21922	-0.77783	-0.11242	-0.56243	-0.34276	-0.29121	-0.11503	0.062654	-0.55025	-0.24289	-0.45989	-0.12269	0.139418	0.034328	0.204542
-0.01308	-0.7129	-0.6855	-0.61906	-0.74064	0.020223	-0.55418	-0.37859	-0.39815	-0.82635	-0.2442	-0.6807	-1.08494	-0.40938	-0.46504	0.097865	-0.40435	-0.07776	-0.30512	-0.12862	-0.26034	-0.77254	-0.1419	-0.54194	-0.32088	-0.32295	-0.13708	0.086908	-0.5658	-0.23368	-0.47136	-0.09686	0.046701	0.041802	0.17163
-0.00477	-0.72535	-0.69277	-0.63314	-0.76736	-0.00239	-0.5233	-0.40521	-0.37834	-0.84392	-0.2467	-0.67436	-1.11568	-0.40055	-0.4808	0.134348	-0.43348	-0.03609	-0.28258	-0.13079	-0.25657	-0.76227	-0.16041	-0.5819	-0.29354	-0.2407	-0.12863	0.068155	-0.57127	-0.24496	-0.48193	-0.10417	0.020252	-0.01874	0.081788
0.013965	-0.7099	-0.71417	-0.61549	-0.74652	-0.00785	-0.48528	-0.41221	-0.29695	-0.87777	-0.21049	-0.65639	-1.1173	-0.3785	-0.43446	0.196691	-0.46642	0.000766	-0.2707	-0.13023	-0.25815	-0.75284	-0.18455	-0.61608	-0.27604	-0.19834	-0.14291	0.068072	-0.51979	-0.27903	-0.49575	-0.10042	0.003591	-0.01845	0.038935
-0.00148	-0.67727	-0.72208	-0.6163	-0.73015	-0.02033	-0.46076	-0.40876	-0.26463	-0.90276	-0.16078	-0.66222	-1.10997	-0.39772	-0.36887	0.188642	-0.50496	0.077117	-0.19599	-0.17977	-0.26543	-0.74564	-0.22675	-0.66372	-0.2569	-0.16399	-0.10733	0.02346	-0.44242	-0.2799	-0.52104	-0.10644	-0.0184	-0.07512	-0.03706
-0.02943	-0.62858	-0.73242	-0.61136	-0.77141	-0.02336	-0.43341	-0.37466	-0.22458	-0.94296	-0.11066	-0.67102	-1.102	-0.40775	-0.31883	0.154941	-0.49938	0.057641	-0.10485	-0.24458	-0.30235	-0.75757	-0.24286	-0.62873	-0.18922	-0.12427	-0.10575	0.065993	-0.41763	-0.27383	-0.51329	-0.14787	-0.05311	0.044933	0.005933
-0.0446	-0.598	-0.72231	-0.60198	-0.82746	-0.05882	-0.44735	-0.38827	-0.26514	-0.94652	-0.03058	-0.68102	-1.10533	-0.40926	-0.26348	0.143678	-0.47116	0.089457	-0.04909	-0.29074	-0.26855	-0.74708	-0.22223	-0.61114	-0.08387	-0.01614	-0.10582	0.115591	-0.43083	-0.27146	-0.50359	-0.11996	-0.10357	0.030401	0.034931
-0.06411	-0.56796	-0.7347	-0.56301	-0.8301	-0.09055	-0.46774	-0.41613	-0.25285	-0.95585	0.019257	-0.65374	-1.10245	-0.3698	-0.23786	0.179633	-0.45551	0.058165	-0.03655	-0.25622	-0.25982	-0.73349	-0.13897	-0.60733	0.044677	0.066664	-0.14756	0.170889	-0.49542	-0.27263	-0.48946	-0.07689	-0.12506	0.116892	0.061963
-0.06747	-0.52929	-0.75502	-0.52398	-0.79096	-0.11956	-0.45699	-0.46762	-0.24437	-0.95441	0.067086	-0.6748	-1.08869	-0.35484	-0.18405	0.264538	-0.44158	0.090866	-0.06415	-0.22271	-0.26181	-0.68697	-0.07818	-0.62327	0.148348	0.052823	-0.20466	0.156343	-0.49301	-0.25821	-0.49551	-0.04097	-0.15817	0.03849	0.017217
-0.02908	-0.50799	-0.78387	-0.50762	-0.77813	-0.138	-0.40839	-0.45868	-0.22847	-0.98322	0.113088	-0.70389	-1.07504	-0.36457	-0.16777	0.266496	-0.40482	0.059457	-0.10716	-0.27757	-0.33266	-0.66207	-0.00077	-0.57188	0.208182	0.06809	-0.21295	0.124237	-0.4154	-0.27701	-0.48583	-0.04892	-0.20503	0.034049	-0.03987
-0.00755	-0.50167	-0.78878	-0.49355	-0.78952	-0.15263	-0.37926	-0.46235	-0.23323	-1.00391	0.193211	-0.73228	-1.06068	-0.39799	-0.12029	0.256515	-0.35179	0.156583	-0.14771	-0.25837	-0.38104	-0.62712	0.039266	-0.5971	0.204771	0.148324	-0.20497	0.069459	-0.39455	-0.24433	-0.52752	-0.07471	-0.17074	-0.051	-0.09613
-0.00971	-0.49123	-0.8068	-0.47594	-0.79943	-0.15794	-0.36629	-0.41932	-0.23881	-1.01364	0.291231	-0.7101	-1.04878	-0.41986	-0.07925	0.25756	-0.27721	0.194439	-0.18124	-0.31286	-0.4401	-0.59146	0.084857	-0.68272	0.291434	0.252117	-0.17076	0.063188	-0.38627	-0.25321	-0.57437	-0.09612	-0.17345	-0.09544	-0.11139
-0.03847	-0.46263	-0.82089	-0.41273	-0.77676	-0.16795	-0.33491	-0.46414	-0.20883	-1.01202	0.414943	-0.72215	-1.05535	-0.45097	-0.06127	0.2931	-0.23934	0.333976	-0.19059	-0.36763	-0.4733	-0.55223	-0.00756	-0.79856	0.335662	0.316977	-0.16104	0.132766	-0.45935	-0.21284	-0.57775	-0.13159	-0.16381	-0.16577	-0.02298
-0.02161	-0.41052	-0.84073	-0.26754	-0.76959	-0.17463	-0.30279	-0.50361	-0.18594	-1.02448	0.554272	-0.70134	-1.07439	-0.44283	-0.03826	0.297525	-0.15548	0.314248	-0.20733	-0.40216	-0.53837	-0.50357	-0.08391	-0.74294	0.440735	0.388899	-0.1128	0.273803	-0.45752	-0.17533	-0.53183	-0.19364	-0.247	-0.2119	0.058332
-0.00691	-0.36186	-0.84732	-0.13488	-0.78564	-0.19862	-0.30122	-0.55624	-0.15676	-1.03536	0.69741	-0.75019	-1.10154	-0.46714	-0.03128	0.277195	-0.1584	0.279477	-0.2345	-0.31946	-0.54655	-0.4933	-0.1684	-0.60242	0.465	0.479693	-0.07186	0.387662	-0.49568	-0.17313	-0.50735	-0.16132	-0.32018	-0.2843	0.177157
-0.00184	-0.31787	-0.85137	-0.00875	-0.82407	-0.2267	-0.31425	-0.51859	-0.14412	-1.04069	0.779165	-0.7431	-1.11697	-0.45838	-0.02416	0.30281	-0.13122	0.209173	-0.26799	-0.22086	-0.55128	-0.46388	-0.19198	-0.47375	0.535286	0.537926	-0.06091	0.467369	-0.47974	-0.18991	-0.50543	-0.15705	-0.39736	-0.25778	0.216969
-0.04068	-0.30257	-0.8644	0.006579	-0.85294	-0.26253	-0.36144	-0.43948	-0.12422	-1.0572	0.86036	-0.66314	-1.11727	-0.46771	-0.04903	0.367337	-0.18306	0.157665	-0.30119	-0.14283	-0.5559	-0.45146	-0.26366	-0.44322	0.555236	0.504092	-0.06479	0.489582	-0.47568	-0.23797	-0.55239	-0.14212	-0.3446	-0.26973	0.190601
-0.04943	-0.29017	-0.8826	0.032814	-0.86255	-0.30069	-0.41222	-0.39973	-0.15306	-1.08407	0.933399	-0.55753	-1.11798	-0.48544	-0.07059	0.426729	-0.18466	0.114468	-0.32794	-0.14005	-0.58452	-0.394	-0.37075	-0.47436	0.541392	0.476744	-0.08631	0.520836	-0.45825	-0.24344	-0.5739	-0.10574	-0.28753	-0.26793	0.119482
-0.0789	-0.27909	-0.90676	0.045789	-0.85996	-0.3235	-0.49274	-0.38512	-0.17531	-1.10393	1.0303	-0.43213	-1.11581	-0.49217	-0.07051	0.464517	-0.11253	0.005984	-0.37537	-0.01991	-0.61897	-0.3254	-0.46022	-0.44156	0.587806	0.460753	-0.09322	0.553865	-0.47016	-0.22633	-0.56394	-0.10671	-0.25675	-0.32891	0.056369
-0.13247	-0.26958	-0.92986	0.096661	-0.87338	-0.33849	-0.49467	-0.4079	-0.19886	-1.1194	1.11304	-0.43952	-1.14646	-0.51557	-0.06154	0.477809	-0.03438	0.017618	-0.4213	-0.03968	-0.62446	-0.24515	-0.40296	-0.37674	0.62956	0.517102	-0.09486	0.629243	-0.45255	-0.21584	-0.51245	-0.13314	-0.30097	-0.38687	0.037378
-0.21295	-0.2573	-0.9384	0.151611	-0.90791	-0.33907	-0.52151	-0.39211	-0.16883	-1.12913	1.19928	-0.43077	-1.16062	-0.51686	-0.04477	0.516902	0.064889	0.032766	-0.45872	0.056121	-0.61452	-0.1595	-0.28065	-0.2617	0.712379	0.58944	-0.06687	0.628488	-0.41315	-0.17608	-0.44132	-0.2816	-0.3587	-0.40435	-0.05073
-0.30771	-0.23828	-0.9538	0.206279	-0.94695	-0.34712	-0.54735	-0.44059	-0.13129	-1.11801	1.22711	-0.49298	-1.17919	-0.55262	-0.03346	0.603296	0.113231	0.101339	-0.47348	0.173821	-0.60609	-0.06683	-0.26631	-0.21468	0.725855	0.565084	-0.06965	0.629279	-0.38293	-0.17054	-0.42604	-0.36218	-0.33455	-0.37471	-0.12593
-0.32274	-0.20824	-0.9687	0.232277	-0.9815	-0.37378	-0.5643	-0.41535	-0.10026	-1.0957	1.24324	-0.48476	-1.15412	-0.60173	-0.02541	0.668823	0.244456	0.084577	-0.51497	0.288236	-0.5933	0.038677	-0.30859	-0.19649	0.740663	0.465844	-0.07809	0.610184	-0.3869	-0.15752	-0.41328	-0.388	-0.274	-0.3607	-0.15468
-0.37385	-0.1884	-0.98932	0.249956	-0.99447	-0.40165	-0.54401	-0.43398	-0.08742	-1.07497	1.26351	-0.47105	-1.15636	-0.6409	-0.03127	0.746554	0.413659	0.143533	-0.57865	0.293129	-0.55858	0.131674	-0.34904	-0.19773	0.761511	0.352132	-0.08762	0.621501	-0.42757	-0.17823	-0.38024	-0.33847	-0.08373	-0.37304	-0.09747
-0.40509	-0.17604	-1.00311	0.242214	-0.98637	-0.42376	-0.53555	-0.4054	-0.07271	-1.1011	1.3456	-0.36528	-1.15851	-0.68707	-0.03643	0.796501	0.647043	0.149129	-0.61579	0.28561	-0.52295	0.226957	-0.22801	-0.18552	0.772961	0.433028	-0.10748	0.638657	-0.44145	-0.15244	-0.33533	-0.22713	0.024826	-0.44429	-0.00752
-0.4965	-0.16777	-1.02124	0.240572	-0.9685	-0.41663	-0.50844	-0.38999	-0.06518	-1.12808	1.41358	-0.34634	-1.17059	-0.68842	-0.07212	0.901643	0.835383	0.261998	-0.66438	0.219757	-0.56025	0.318623	-0.06981	-0.21972	0.801783	0.411938	-0.13479	0.664634	-0.49611	-0.16143	-0.30514	-0.0543	0.113697	-0.43424	0.140857
-0.53891	-0.1419	-1.03565	0.228532	-0.92704	-0.42032	-0.48297	-0.36116	-0.07543	-1.16502	1.47099	-0.29863	-1.16198	-0.66972	-0.14483	0.96865	1.06305	0.300013	-0.68142	0.21524	-0.59791	0.392773	0.020665	-0.30743	0.849396	0.370696	-0.18018	0.690822	-0.56692	-0.16095	-0.27249	0.072019	0.115865	-0.47249	0.35243
-0.61017	-0.10209	-1.04453	0.238625	-0.89399	-0.41776	-0.45606	-0.32482	-0.07863	-1.17144	1.48611	-0.31238	-1.15194	-0.59375	-0.18426	1.05198	1.2426	0.385617	-0.70251	0.165225	-0.64227	0.444756	0.021237	-0.45006	0.912566	0.214665	-0.18958	0.695408	-0.67837	-0.13415	-0.25373	0.179976	0.189714	-0.43899	0.524924
-0.63778	-0.06936	-1.03067	0.250135	-0.88054	-0.44685	-0.48187	-0.30578	-0.05935	-1.19811	1.48915	-0.25081	-1.16299	-0.5593	-0.21407	1.12251	1.50842	0.405673	-0.69585	0.267344	-0.6379	0.504246	0.033729	-0.57805	0.957923	0.172978	-0.23279	0.701887	-0.757	-0.11463	-0.14494	0.274444	0.265254	-0.49524	0.596179
-0.69376	-0.03837	-1.03213	0.224426	-0.89448	-0.45203	-0.51116	-0.32565	-0.01173	-1.20175	1.47379	-0.29182	-1.17774	-0.56459	-0.22874	1.20802	1.71794	0.418168	-0.72314	0.310157	-0.66786	0.563737	0.059991	-0.63519	0.937012	0.039668	-0.26508	0.672249	-0.82152	-0.13159	-0.03585	0.457838	0.361025	-0.55264	0.617183
-0.68079	-0.01645	-1.05798	0.218107	-0.97233	-0.47608	-0.54148	-0.30911	0.021926	-1.20677	1.44758	-0.2972	-1.20099	-0.60216	-0.28313	1.22965	1.87924	0.483671	-0.76001	0.34124	-0.68603	0.626478	0.062831	-0.65141	0.877475	-0.12592	-0.28511	0.704598	-0.88456	-0.22567	0.078162	0.667436	0.544718	-0.70284	0.614989
-0.70014	0.002159	-1.09073	0.226646	-1.00386	-0.47709	-0.53468	-0.31935	0.041248	-1.19885	1.42669	-0.3495	-1.19879	-0.63676	-0.29438	1.23327	1.99051	0.574216	-0.79082	0.310604	-0.71297	0.641228	0.060563	-0.65665	0.849213	-0.28413	-0.26507	0.722092	-0.94938	-0.3149	0.159929	0.78581	0.659329	-0.82166	0.675
-0.69059	0.017065	-1.10088	0.267437	-1.0205	-0.46838	-0.50155	-0.26317	0.068802	-1.19906	1.39951	-0.40257	-1.19572	-0.6405	-0.29587	1.23217	2.01643	0.656367	-0.79407	0.239948	-0.75031	0.653942	0.159204	-0.69723	0.86889	-0.40061	-0.25012	0.768489	-0.95723	-0.34777	0.249889	0.826524	0.741397	-0.90743	0.699654
-0.71921	0.017924	-1.09756	0.282367	-0.99974	-0.45284	-0.48744	-0.27102	0.072607	-1.22074	1.38463	-0.44681	-1.18253	-0.65349	-0.2974	1.26465	2.06774	0.692446	-0.81698	0.237628	-0.81983	0.653722	0.360846	-0.73633	0.853665	-0.45826	-0.26632	0.754017	-0.93876	-0.32053	0.454638	0.759247	0.812245	-0.93106	0.742979
-0.71172	0.040826	-1.09122	0.26395	-0.95479	-0.44469	-0.49338	-0.26662	0.089404	-1.2172	1.38789	-0.45264	-1.16418	-0.60998	-0.33218	1.33836	2.08878	0.7011	-0.84304	0.203509	-0.89836	0.667089	0.504268	-0.78443	0.824705	-0.54201	-0.31261	0.707599	-0.92058	-0.25454	0.670523	0.824988	0.907105	-0.90964	0.700449
-0.69135	0.070262	-1.10023	0.28655	-0.93385	-0.45349	-0.55537	-0.34982	0.110592	-1.22316	1.37729	-0.3956	-1.15343	-0.59097	-0.35897	1.40694	2.11154	0.788475	-0.89284	0.301897	-0.92952	0.69051	0.595335	-0.80478	0.772431	-0.6432	-0.35111	0.684248	-0.90448	-0.14033	0.96835	0.842127	0.995812	-0.92258	0.619027
-0.69962	0.104733	-1.10962	0.283933	-0.89885	-0.45834	-0.56755	-0.35506	0.118922	-1.23267	1.35818	-0.40678	-1.13881	-0.5849	-0.3738	1.46891	2.13359	0.917714	-0.90329	0.265699	-0.94407	0.691445	0.682832	-0.82194	0.735629	-0.73501	-0.42033	0.665452	-0.83735	-0.11931	1.24202	0.904635	1.02592	-0.96815	0.426139
-0.7279	0.129795	-1.10315	0.284036	-0.94971	-0.4573	-0.52383	-0.40159	0.139047	-1.23769	1.31482	-0.46494	-1.15388	-0.58403	-0.35475	1.47362	2.17263	1.04127	-0.94637	0.225593	-0.88829	0.711543	0.806012	-0.74868	0.704326	-0.84026	-0.4272	0.694401	-0.74962	-0.11006	1.60946	0.847275	1.01441	-1.0114	0.231328
-0.75484	0.145107	-1.09169	0.244818	-0.94913	-0.45727	-0.45684	-0.3935	0.176782	-1.24947	1.28404	-0.51908	-1.17296	-0.55962	-0.31926	1.44977	2.23121	1.15034	-0.9887	0.184281	-0.84421	0.706876	0.899343	-0.71519	0.61486	-0.7556	-0.40681	0.677028	-0.62142	-0.15005	1.96223	0.685531	1.03709	-0.99679	-0.00858
-0.73753	0.1634	-1.0656	0.221363	-0.9541	-0.44837	-0.401	-0.4681	0.245619	-1.2428	1.24231	-0.57432	-1.19222	-0.496	-0.30643	1.39717	2.22328	1.21397	-1.01997	0.156021	-0.78556	0.716088	1.0674	-0.71013	0.527702	-0.73756	-0.3372	0.600296	-0.54201	-0.17576	2.20376	0.667943	1.07126	-0.97857	-0.12725
-0.71925	0.178096	-1.04101	0.226345	-0.89862	-0.43699	-0.35265	-0.56737	0.29934	-1.22339	1.18828	-0.60232	-1.20112	-0.41539	-0.31727	1.34065	2.1933	1.28925	-1.03024	0.140477	-0.77056	0.713565	1.168	-0.75736	0.408115	-0.65229	-0.27362	0.53754	-0.47484	-0.19915	2.32241	0.712757	1.12716	-0.9471	-0.18709
-0.69804	0.179674	-1.01333	0.216284	-0.86902	-0.42691	-0.29925	-0.63173	0.307006	-1.19957	1.15869	-0.6283	-1.21844	-0.3474	-0.3287	1.30242	2.14762	1.32129	-1.01358	0.116647	-0.73619	0.720277	1.20499	-0.79526	0.348823	-0.66696	-0.24847	0.534249	-0.53126	-0.19142	2.3578	0.876263	1.19211	-0.97571	-0.1235
-0.63319	0.168779	-0.9905	0.235674	-0.80184	-0.40571	-0.2271	-0.66786	0.30926	-1.17082	1.09593	-0.64364	-1.22731	-0.29015	-0.29823	1.27777	2.09671	1.41718	-1.03041	0.146567	-0.7108	0.719959	1.08091	-0.75455	0.261053	-0.58728	-0.21778	0.653875	-0.54697	-0.18355	2.41631	0.829141	1.22762	-0.94988	-0.14318
-0.61488	0.18468	-0.98446	0.257115	-0.74759	-0.38624	-0.19283	-0.68297	0.340659	-1.18315	1.05167	-0.617	-1.23768	-0.25609	-0.28072	1.25521	2.04523	1.53726	-1.0115	0.183012	-0.70103	0.714694	1.06929	-0.70465	0.197498	-0.54749	-0.18486	0.719335	-0.55926	-0.18545	2.48258	0.624462	1.28177	-0.88146	-0.22728
-0.55889	0.197963	-0.96693	0.34542	-0.70581	-0.33822	-0.16048	-0.71351	0.394675	-1.19764	0.975854	-0.51807	-1.22858	-0.22283	-0.26752	1.22629	1.97615	1.73786	-0.97305	0.273901	-0.6653	0.701818	1.14759	-0.648	0.073133	-0.39677	-0.15868	0.847961	-0.47185	-0.18714	2.53028	0.357461	1.36372	-0.7683	-0.40481
-0.4835	0.211368	-0.93139	0.433122	-0.66924	-0.29911	-0.04944	-0.79217	0.476331	-1.19558	0.919731	-0.3289	-1.2399	-0.13518	-0.27915	1.23388	1.92975	1.90249	-0.88274	0.252452	-0.67305	0.707722	1.22863	-0.6131	0.003821	-0.40242	-0.08649	0.946074	-0.40416	-0.15172	2.60816	0.109809	1.47368	-0.68909	-0.54768
-0.35524	0.223799	-0.88194	0.512559	-0.57352	-0.20383	0.07443	-0.81847	0.564603	-1.17002	0.88066	-0.15766	-1.22015	-0.00898	-0.26009	1.25562	1.85966	1.99362	-0.71559	0.259357	-0.66613	0.724718	1.27254	-0.6066	-0.04587	-0.33162	-0.05626	1.04156	-0.31543	-0.11097	2.61118	-0.04588	1.60877	-0.67705	-0.66079
-0.1596	0.265843	-0.83759	0.575461	-0.4559	-0.09777	0.276925	-0.9003	0.687107	-1.13369	0.815801	0.04042	-1.21508	0.152237	-0.22651	1.33803	1.78148	1.96649	-0.48261	0.216396	-0.71097	0.776077	1.18242	-0.58714	-0.08272	-0.45293	-0.00199	1.05124	-0.26515	-0.0697	2.53589	-0.03747	1.53411	-0.63443	-0.7767
0.039914	0.323656	-0.78459	0.622624	-0.338	0.01702	0.42152	-0.93677	0.82864	-1.10897	0.795631	0.189001	-1.18731	0.277267	-0.15877	1.4096	1.70421	1.88477	-0.2633	0.232457	-0.69216	0.831144	1.15674	-0.57245	-0.15525	-0.39046	0.028565	1.04104	-0.2272	0.003694	2.43069	-0.19252	1.46112	-0.55208	-0.88957
0.259091	0.387409	-0.73891	0.719371	-0.25213	0.113877	0.602819	-0.96914	0.93384	-1.06743	0.765665	0.344042	-1.1751	0.347387	-0.11399	1.49394	1.60509	1.80526	-0.09977	0.203826	-0.66987	0.883596	1.13001	-0.52965	-0.24228	-0.3306	0.081549	1.0974	-0.21937	0.071155	2.32427	-0.30881	1.37718	-0.424	-0.91484
0.410668	0.438456	-0.68703	0.762009	-0.1819	0.210361	0.731377	-0.95357	1.03665	-1.02046	0.769067	0.463335	-1.13921	0.408095	-0.06321	1.55892	1.51109	1.76844	0.006249	0.106708	-0.63673	0.905416	1.153	-0.46496	-0.33345	-0.16217	0.15888	1.19737	-0.20049	0.099964	2.2554	-0.52679	1.48439	-0.28647	-0.92168
0.538027	0.495496	-0.65968	0.796021	-0.09108	0.282523	0.830592	-0.91515	1.11069	-0.96036	0.756145	0.546131	-1.0932	0.475157	-0.04013	1.63623	1.4267	1.75253	0.107615	0.115957	-0.6225	0.923126	1.16175	-0.38612	-0.40737	-0.18013	0.229613	1.25599	-0.22435	0.125602	2.09417	-0.43606	1.52727	-0.19351	-0.90904
0.694638	0.547797	-0.63735	0.801514	0.022638	0.347557	0.871597	-0.8078	1.21657	-0.93736	0.700945	0.601432	-1.03633	0.569402	-0.01168	1.71249	1.37202	1.69642	0.229233	0.135599	-0.62625	0.915818	1.10539	-0.30663	-0.46565	-0.2709	0.308394	1.29508	-0.27327	0.204257	1.99563	-0.38149	1.50084	-0.16711	-0.86641
0.810858	0.610254	-0.60073	0.8378	0.166308	0.382607	0.908548	-0.75169	1.31627	-0.90823	0.664807	0.609382	-0.97487	0.658082	0.015255	1.79764	1.36289	1.60902	0.311907	0.229408	-0.61522	0.901805	1.10083	-0.29163	-0.50671	-0.33845	0.384498	1.32565	-0.36026	0.324134	1.86759	-0.19813	1.45327	-0.09596	-0.78988
0.874357	0.684601	-0.53845	0.881113	0.29814	0.422105	0.96439	-0.65054	1.47903	-0.86835	0.639415	0.644863	-0.91284	0.749613	0.09726	1.87404	1.34953	1.43192	0.356132	0.206108	-0.59542	0.877433	1.04486	-0.26172	-0.52945	-0.2045	0.469697	1.34569	-0.4085	0.48911	1.83559	-0.23448	1.40779	0.07905	-0.71857
0.896467	0.77717	-0.45894	0.888622	0.42871	0.434359	1.00522	-0.68748	1.60628	-0.80011	0.667045	0.638536	-0.85224	0.82118	0.204295	1.95849	1.33843	1.28602	0.381323	0.292397	-0.5857	0.870332	0.965244	-0.23624	-0.56891	-0.06069	0.562844	1.33101	-0.4131	0.64378	1.76166	-0.19512	1.34152	0.161539	-0.67925
0.903312	0.856663	-0.40026	0.89972	0.547551	0.452068	0.991267	-0.63298	1.6774	-0.7576	0.69754	0.665501	-0.78884	0.834371	0.312123	1.99038	1.31772	1.15054	0.404646	0.408123	-0.58202	0.863274	0.98049	-0.2012	-0.58334	0.066163	0.640302	1.27603	-0.42999	0.794089	1.7269	-0.19569	1.22691	0.255513	-0.66336
0.907125	0.908794	-0.37278	0.912925	0.6242	0.457073	1.0286	-0.63184	1.67746	-0.7342	0.699557	0.725883	-0.73621	0.821526	0.388929	2.02513	1.24801	1.07481	0.486168	0.471843	-0.54796	0.858095	0.987389	-0.21982	-0.6113	0.110648	0.648866	1.29726	-0.42042	0.910609	1.62945	-0.06325	1.11734	0.267862	-0.65337
0.917814	0.897252	-0.35621	0.901322	0.664249	0.477597	1.07887	-0.58498	1.66467	-0.7492	0.712372	0.79942	-0.68472	0.780237	0.430681	2.0279	1.20431	1.0181	0.570068	0.472393	-0.48015	0.860294	1.07356	-0.23945	-0.59736	0.157581	0.597084	1.30175	-0.45983	0.993678	1.53802	-0.01865	1.09628	0.381638	-0.62298
0.965074	0.884721	-0.35168	0.913756	0.682029	0.469926	1.16082	-0.52845	1.63244	-0.74417	0.706236	0.892373	-0.65866	0.760026	0.441049	2.05047	1.14712	0.954859	0.6934	0.462308	-0.42209	0.882963	1.06002	-0.24646	-0.59932	0.193971	0.545646	1.29617	-0.42454	1.0479	1.42579	0.040499	1.06115	0.382332	-0.57979
1.00869	0.856686	-0.33402	0.898754	0.69202	0.468159	1.23053	-0.5028	1.58203	-0.73656	0.747183	0.930587	-0.62945	0.719566	0.45537	2.0646	1.13633	0.929249	0.759803	0.467188	-0.3596	0.899634	1.1237	-0.24542	-0.6243	0.161181	0.551063	1.29432	-0.44708	1.09074	1.35824	0.038034	1.01237	0.423683	-0.49644
1.05486	0.874334	-0.3318	0.895028	0.704079	0.491498	1.30408	-0.49619	1.50973	-0.71468	0.74248	0.990632	-0.6191	0.700407	0.479616	2.08547	1.06576	0.886699	0.820495	0.433996	-0.28253	0.900394	1.13446	-0.21383	-0.63542	0.142734	0.573917	1.2967	-0.38783	1.15489	1.27048	0.098741	0.929555	0.396385	-0.54504
1.10243	0.863064	-0.30191	0.826917	0.722913	0.548387	1.39419	-0.49794	1.45928	-0.68913	0.76469	0.963785	-0.59036	0.679261	0.521541	2.09099	0.994245	0.863265	0.851305	0.313277	-0.22191	0.899313	1.20665	-0.13926	-0.60988	0.082738	0.585577	1.27364	-0.36785	1.25939	1.17118	0.1422	0.897317	0.377193	-0.53704
1.19667	0.886781	-0.28272	0.798605	0.731933	0.622615	1.4021	-0.51387	1.4163	-0.65509	0.726211	1.01656	-0.57045	0.674457	0.543314	2.05128	0.929688	0.78714	0.85712	0.331389	-0.19451	0.896871	1.24561	-0.07738	-0.54065	0.144569	0.629508	1.19657	-0.35781	1.36151	1.0685	0.184068	0.809342	0.311378	-0.51504
1.24238	0.907184	-0.25048	0.761803	0.730713	0.659045	1.40632	-0.47336	1.39339	-0.60798	0.734154	1.1253	-0.54191	0.632446	0.599054	2.00223	0.862221	0.690521	0.856433	0.344213	-0.16508	0.902724	1.28162	-0.09155	-0.5136	0.156826	0.683689	1.12994	-0.35186	1.42654	1.00412	0.175158	0.783195	0.297298	-0.42355
1.27182	0.946955	-0.22437	0.774208	0.72505	0.698158	1.39627	-0.49342	1.37118	-0.55579	0.747014	1.33071	-0.51956	0.611242	0.652104	1.96412	0.827163	0.620465	0.9103	0.442435	-0.16396	0.909111	1.30623	-0.07438	-0.47275	0.165324	0.730749	1.10803	-0.37271	1.49602	0.964169	0.205877	0.663914	0.24033	-0.4019
1.29585	0.969243	-0.19237	0.764619	0.734596	0.716156	1.45215	-0.44897	1.35194	-0.50564	0.790456	1.49805	-0.50185	0.582648	0.732289	1.97272	0.75826	0.572144	1.05935	0.431539	-0.16394	0.905614	1.32687	-0.07894	-0.49597	0.145002	0.725374	1.08663	-0.33476	1.56208	0.903642	0.195228	0.656185	0.225915	-0.42197
1.31549	0.977379	-0.1456	0.806602	0.759646	0.74873	1.52197	-0.46142	1.34459	-0.45153	0.86598	1.72298	-0.47916	0.589914	0.79299	1.99173	0.72857	0.569356	1.20726	0.512193	-0.20999	0.923794	1.42891	-0.01799	-0.46757	0.161736	0.711649	1.05658	-0.34596	1.64533	0.847547	0.231181	0.554898	0.182457	-0.46832
1.37223	0.994566	-0.11384	0.805351	0.77608	0.763405	1.62711	-0.44634	1.35926	-0.4219	0.923676	1.90363	-0.46613	0.556078	0.840708	2.01481	0.68415	0.552751	1.27624	0.384048	-0.19685	0.947395	1.42177	-0.02194	-0.47929	0.159901	0.705264	1.05214	-0.32448	1.68006	0.781655	0.226049	0.538005	0.194269	-0.46205
1.39418	1.00928	-0.06488	0.83096	0.783117	0.791471	1.70995	-0.44276	1.33536	-0.40596	0.973617	2.17891	-0.44296	0.526279	0.856513	1.99137	0.638799	0.528254	1.27042	0.385451	-0.17756	1.00187	1.43178	0.029983	-0.41946	0.126381	0.7157	1.0731	-0.30741	1.7427	0.735588	0.22009	0.494287	0.141641	-0.4984
1.41779	1.02493	-0.02262	0.800938	0.788255	0.803565	1.77978	-0.42625	1.30364	-0.41294	0.996292	2.29056	-0.43792	0.464115	0.863729	1.99014	0.587118	0.505795	1.26089	0.277898	-0.15614	0.992617	1.37444	0.139424	-0.36543	0.132716	0.746315	1.06146	-0.2339	1.81409	0.688565	0.155439	0.502026	0.144701	-0.47301
1.41808	1.05042	0.043583	0.818425	0.780942	0.838452	1.79314	-0.42966	1.2844	-0.38044	1.03367	2.42825	-0.42609	0.425132	0.886458	1.95933	0.530557	0.466321	1.31613	0.410041	-0.16863	0.962033	1.40131	0.260777	-0.32234	0.164141	0.804622	1.00541	-0.11374	1.8491	0.657018	0.017698	0.491101	0.125849	-0.48479
1.38985	1.09605	0.099917	0.817776	0.80305	0.863196	1.79809	-0.43438	1.3133	-0.35527	1.1076	2.4226	-0.42581	0.355368	0.893678	1.93796	0.492674	0.442597	1.3839	0.490011	-0.21207	0.916984	1.45101	0.375956	-0.23123	0.209981	0.887937	0.966228	0.034318	1.8558	0.594597	0.085676	0.382366	0.157069	-0.4336
1.38695	1.13979	0.157953	0.803012	0.792319	0.908712	1.85327	-0.43594	1.3347	-0.31815	1.16169	2.40749	-0.4124	0.303822	0.89627	1.89373	0.436891	0.386825	1.40149	0.478151	-0.21359	0.906796	1.46485	0.400098	-0.20971	0.131566	0.979771	0.959152	0.143574	1.86293	0.528293	0.100327	0.340985	0.11325	-0.40004
1.34207	1.17793	0.199783	0.764713	0.834675	0.924282	1.92922	-0.39101	1.33586	-0.3102	1.2123	2.32555	-0.40206	0.257184	0.891413	1.89733	0.404297	0.353977	1.38804	0.411737	-0.20367	0.900633	1.47592	0.436291	-0.20789	0.09713	1.02361	0.993189	0.194049	1.90195	0.469494	0.174116	0.315447	0.112771	-0.36006
1.36057	1.20856	0.251604	0.727704	0.863473	0.971281	2.00429	-0.40009	1.33836	-0.29071	1.24513	2.24965	-0.37971	0.2447	0.912804	1.90563	0.401243	0.285761	1.39719	0.322783	-0.15255	0.902133	1.41665	0.473917	-0.17529	9.81e-05	1.03803	0.961021	0.198021	1.94354	0.447272	0.162594	0.394887	0.067808	-0.32758
1.37334	1.23428	0.297082	0.723708	0.900737	0.996515	2.0265	-0.39335	1.32834	-0.28945	1.29078	2.23438	-0.36787	0.232066	0.911874	1.87766	0.407177	0.264096	1.44966	0.385449	-0.1072	0.886791	1.38109	0.537847	-0.15103	0.008084	1.07504	0.967807	0.234269	1.94488	0.431958	0.166319	0.358704	0.005611	-0.38854
1.43237	1.26763	0.36003	0.734062	0.899994	1.03647	2.02221	-0.42804	1.3293	-0.27433	1.33261	2.23455	-0.34634	0.231574	0.915528	1.85625	0.436159	0.240317	1.55906	0.482349	-0.05588	0.86198	1.35316	0.5075	-0.11681	-0.0099	1.09713	0.943773	0.293062	1.95536	0.356631	0.205049	0.316989	-0.02387	-0.39349
1.43678	1.31131	0.418824	0.724355	0.889201	1.05785	2.02422	-0.39244	1.3419	-0.27808	1.36195	2.22192	-0.33695	0.186158	0.895523	1.80919	0.437948	0.19295	1.6648	0.457663	-0.0079	0.827171	1.29153	0.489896	-0.15546	0.047651	1.16564	0.924367	0.342944	1.95188	0.270476	0.167765	0.261768	0.024252	-0.42755
1.42751	1.35761	0.480896	0.7695	0.905472	1.08028	2.08119	-0.34927	1.36245	-0.28279	1.39708	2.21769	-0.31899	0.141294	0.908987	1.7626	0.456449	0.165132	1.80271	0.448236	0.008836	0.838685	1.27153	0.501761	-0.12108	0.090427	1.21779	0.892339	0.408702	1.97877	0.185731	0.145572	0.260146	0.108107	-0.42677
1.4344	1.40401	0.549973	0.792122	0.948015	1.09536	2.14385	-0.2906	1.3908	-0.2898	1.42014	2.23963	-0.29974	0.118537	0.944601	1.72416	0.464514	0.071642	1.88957	0.371146	0.043257	0.85932	1.18832	0.590578	-0.07557	0.054064	1.29558	0.85653	0.428981	2.06126	0.144526	0.094133	0.253585	0.103174	-0.42593
1.50712	1.45118	0.615424	0.886554	0.982395	1.11146	2.21232	-0.24513	1.39048	-0.26606	1.4972	2.37671	-0.26785	0.154558	0.999279	1.72264	0.503749	0.098286	1.98906	0.421083	0.08007	0.888342	1.15459	0.673342	-0.00101	-0.01043	1.34054	0.862592	0.442469	2.16784	0.141311	0.042282	0.210688	0.010731	-0.47424
1.62792	1.50388	0.687519	0.929207	1.00427	1.15414	2.26127	-0.20233	1.40675	-0.25062	1.53697	2.46917	-0.24212	0.157196	1.03426	1.75711	0.548131	0.074582	2.04514	0.45126	0.107541	0.88571	1.10828	0.72667	0.062354	-0.03632	1.34638	0.840179	0.406526	2.24452	0.115609	0.110659	0.187501	-0.08263	-0.43005
1.72685	1.55678	0.735408	0.984557	1.00182	1.20268	2.3082	-0.16248	1.39766	-0.23532	1.58513	2.49755	-0.22299	0.154106	1.01155	1.73411	0.572746	0.125974	2.08289	0.503026	0.136998	0.892083	1.09787	0.771738	0.13227	-0.01921	1.37739	0.809773	0.440738	2.28757	0.104834	0.178344	0.127949	-0.06255	-0.45643
1.74057	1.5771	0.792426	0.968505	1.03387	1.22944	2.32504	-0.12893	1.41132	-0.23208	1.58834	2.43386	-0.20356	0.12654	1.02203	1.71284	0.540498	0.048014	2.0776	0.52711	0.132861	0.90649	1.06258	0.794688	0.186173	-0.00494	1.39147	0.722227	0.506101	2.27597	0.08122	0.218709	0.164642	-0.02308	-0.3698
1.75933	1.59161	0.842364	0.932702	1.07811	1.24007	2.30516	-0.06393	1.44907	-0.17882	1.59792	2.39651	-0.16495	0.147042	1.03025	1.69076	0.49671	0.028728	2.0656	0.540844	0.164476	0.929906	0.954396	0.860649	0.232198	-0.00782	1.41981	0.675803	0.585727	2.25767	0.074991	0.21638	0.083415	0.029272	-0.33221
1.75779	1.61499	0.894478	0.940285	1.15818	1.26234	2.3068	-0.04451	1.48377	-0.14665	1.61035	2.35879	-0.12181	0.157844	1.06722	1.70927	0.433999	-0.02012	2.0135	0.604285	0.184119	0.970589	0.879812	0.932721	0.291494	0.032207	1.41344	0.65156	0.602131	2.23331	0.084792	0.172185	0.041026	0.040017	-0.27633
1.80129	1.64655	0.950981	0.969961	1.2648	1.30443	2.3213	0.026313	1.55441	-0.11269	1.64459	2.27972	-0.08089	0.165669	1.07187	1.72119	0.410593	0.010326	1.99501	0.698922	0.194742	0.988364	0.840656	0.988995	0.369785	0.078075	1.40427	0.656704	0.596416	2.20045	0.058498	0.229911	-0.05097	0.044481	-0.23889
1.82261	1.67766	0.992496	1.0549	1.34242	1.35293	2.32712	0.10402	1.60642	-0.09801	1.68607	2.17912	-0.04511	0.158773	1.07885	1.71009	0.377612	0.016092	1.97831	0.840916	0.221342	0.981836	0.848768	0.979635	0.457772	0.002044	1.39274	0.619982	0.579276	2.14527	0.053745	0.229778	-0.06303	0.039179	-0.19067
1.84564	1.70534	1.04439	1.07039	1.38338	1.39396	2.37505	0.246874	1.69839	-0.0688	1.73308	2.18034	-0.00055	0.139296	1.07354	1.6625	0.378045	-0.02327	1.97357	0.918374	0.250592	0.9249	0.88161	0.939803	0.575373	-0.07075	1.35402	0.548285	0.569265	1.99309	0.044531	0.2806	-0.03215	0.040135	-0.16527
1.88026	1.73639	1.07487	1.09513	1.35043	1.43655	2.37225	0.357366	1.74402	-0.05182	1.74066	2.16871	0.028233	0.116328	1.05028	1.65052	0.385557	-0.08108	1.93004	0.993163	0.34245	0.882696	0.901861	0.921493	0.721247	-0.18518	1.30858	0.461093	0.662168	1.8546	0.081539	0.226851	-0.02987	0.035911	-0.20335
1.92606	1.77366	1.12129	1.08469	1.3579	1.45367	2.32766	0.414773	1.78215	-0.03037	1.74706	2.18843	0.061705	0.093364	1.06335	1.69294	0.424853	-0.12329	1.8578	1.10089	0.42952	0.853586	0.934762	0.927307	0.771339	-0.10988	1.22107	0.347365	0.737684	1.73815	0.126099	0.123028	-0.05056	0.120929	-0.2991
1.99704	1.78559	1.15131	1.06398	1.33353	1.47707	2.23693	0.491544	1.79484	-0.02129	1.77862	2.09153	0.080035	0.079076	1.059	1.6872	0.477058	-0.10809	1.78649	1.11487	0.471266	0.856268	0.90874	0.955054	0.793331	-0.057	1.18657	0.259549	0.873389	1.64082	0.181439	-0.02654	-0.06049	0.071528	-0.46121
2.06076	1.81279	1.18682	1.03719	1.34065	1.5152	2.19929	0.555637	1.79413	-0.0075	1.82596	2.04297	0.108823	0.09241	1.08619	1.65177	0.503394	-0.02735	1.75421	1.10984	0.524456	0.840066	0.93908	0.961156	0.714883	0.036111	1.13582	0.176779	0.894462	1.53631	0.191724	-0.11843	-0.01548	0.033129	-0.56619
2.11467	1.85578	1.22518	1.02287	1.33766	1.5499	2.25941	0.653648	1.82047	0.023558	1.86306	2.01782	0.13833	0.152776	1.08888	1.61041	0.535097	-0.00917	1.73582	1.12017	0.551628	0.822626	0.91744	0.980421	0.689663	-0.01243	1.10667	0.142359	0.959391	1.41204	0.228345	-0.23145	0.058759	0.04558	-0.64828
2.16914	1.91186	1.25836	1.04856	1.37324	1.5863	2.35106	0.774696	1.871	0.054062	1.84761	2.04893	0.176748	0.237992	1.12719	1.62144	0.527621	0.04485	1.68223	1.12694	0.599282	0.794565	0.961493	1.00622	0.628469	-0.05557	1.0685	0.138098	0.947477	1.30872	0.212721	-0.28494	0.051404	0.108486	-0.67519
2.22533	1.95669	1.28824	1.06298	1.41893	1.57198	2.4022	0.915891	1.90444	0.081039	1.82026	2.0762	0.212714	0.3284	1.10962	1.62314	0.529575	0.024111	1.57089	1.11216	0.594228	0.766627	0.887053	1.00706	0.55091	-0.08437	1.03838	0.209188	1.0232	1.2538	0.207505	-0.36574	0.057245	0.138086	-0.71625
2.2661	1.9759	1.3224	1.10028	1.47853	1.57366	2.39378	1.03609	1.92142	0.102188	1.80902	2.06982	0.241087	0.393992	1.11147	1.6285	0.5349	0.056658	1.5089	1.01082	0.600415	0.727277	0.8665	1.00617	0.52642	-0.0937	1.00772	0.274435	1.01761	1.23596	0.178414	-0.36673	-0.02593	0.119526	-0.75053
2.24872	1.9992	1.34388	1.12502	1.55409	1.56354	2.32864	1.10812	1.91293	0.122067	1.8035	1.96447	0.264763	0.45938	1.0889	1.6267	0.482882	0.0294	1.48248	1.01838	0.621333	0.704355	0.754399	0.989338	0.497812	0.01902	0.987392	0.309427	1.08045	1.244	0.150882	-0.36588	-0.06119	0.173728	-0.7695
2.24207	1.99844	1.37258	1.15376	1.61078	1.60057	2.25138	1.12027	1.91866	0.16309	1.80426	1.88621	0.304071	0.499782	1.11423	1.60613	0.440009	0.02297	1.52279	1.13575	0.644965	0.700288	0.852478	1.03767	0.517195	0.092038	0.967637	0.324719	1.09008	1.19974	0.141518	-0.34884	-0.15841	0.268029	-0.78239
2.20879	1.98787	1.37996	1.15854	1.60307	1.62843	2.2123	1.14875	1.89294	0.19222	1.78431	1.78984	0.343959	0.524503	1.11331	1.56349	0.362971	-0.01788	1.51042	1.16944	0.676856	0.710106	0.909996	1.06263	0.51489	0.13558	0.958056	0.326037	1.17249	1.09123	0.050403	-0.2015	-0.17824	0.35372	-0.78061
2.17417	1.94391	1.42183	1.13178	1.60688	1.66509	2.25652	1.1926	1.83821	0.220648	1.76982	1.76437	0.391587	0.540257	1.12791	1.55124	0.405675	0.028206	1.48857	1.15748	0.738406	0.706505	1.06237	1.16774	0.614868	0.079093	0.846437	0.331842	1.17064	0.980361	0.031482	-0.14911	-0.22435	0.336865	-0.78835
2.12437	1.92264	1.4567	1.13076	1.61212	1.68335	2.33822	1.26505	1.796	0.231531	1.74037	1.69839	0.425907	0.566112	1.12041	1.56783	0.476893	0.018783	1.44552	1.07463	0.796211	0.695776	1.10547	1.22489	0.656329	0.084714	0.74849	0.302673	1.15376	0.845102	-0.00802	-0.06791	-0.26101	0.382391	-0.82429
2.13008	1.90315	1.49456	1.10932	1.66619	1.71412	2.40342	1.34989	1.79211	0.228709	1.69883	1.62465	0.45862	0.604211	1.11205	1.53419	0.556609	0.008895	1.37734	1.03705	0.826905	0.679375	1.15209	1.29437	0.703458	0.144637	0.657465	0.291466	1.12627	0.748789	0.036149	-0.17182	-0.24773	0.36862	-0.81686
2.16014	1.90581	1.52798	1.13047	1.68486	1.74276	2.40638	1.38122	1.76601	0.256823	1.63884	1.55595	0.485071	0.660624	1.11131	1.52294	0.603674	-0.05026	1.34333	1.03191	0.846953	0.650258	1.20298	1.32216	0.697622	0.209651	0.610628	0.238928	1.13283	0.612147	0.016056	-0.13906	-0.25132	0.392932	-0.81074
2.1715	1.9196	1.55379	1.09787	1.7089	1.76514	2.41072	1.43603	1.71474	0.302736	1.57282	1.4951	0.508823	0.706046	1.11291	1.4928	0.595201	-0.01521	1.31596	0.951849	0.89416	0.615284	1.24618	1.3316	0.73475	0.165629	0.557231	0.176205	1.16108	0.502745	0.002885	-0.1385	-0.25905	0.308872	-0.77382
2.15198	1.9299	1.57506	1.09543	1.70494	1.79539	2.39458	1.45222	1.62277	0.359126	1.49321	1.46905	0.543455	0.768955	1.12859	1.50945	0.594013	-0.00732	1.32728	0.891599	0.925274	0.573811	1.32166	1.32704	0.755822	0.156619	0.493931	0.08494	1.17071	0.367653	-0.0409	-0.0493	-0.23306	0.310715	-0.72199
2.17091	1.93451	1.58206	1.09134	1.73246	1.8073	2.36535	1.54703	1.58802	0.39577	1.44256	1.42199	0.589986	0.800364	1.12293	1.47811	0.557787	0.010984	1.32824	0.772916	0.919662	0.555504	1.27378	1.28087	0.707409	0.127334	0.457886	0.067882	1.14732	0.277087	-0.08156	-0.05668	-0.17212	0.340461	-0.66696
2.17756	1.9095	1.58674	1.10235	1.7645	1.81649	2.35286	1.63947	1.53274	0.413153	1.42032	1.40186	0.658283	0.867664	1.12954	1.46895	0.578408	-0.01975	1.29944	0.759006	0.938105	0.533884	1.25555	1.29978	0.679815	0.171961	0.405594	0.034475	1.14047	0.220241	-0.09869	-0.02631	-0.13716	0.44736	-0.64803
2.21699	1.91592	1.6082	1.10637	1.79923	1.79878	2.30318	1.71102	1.48609	0.453808	1.42857	1.30608	0.716438	0.894294	1.10272	1.44262	0.596829	-0.01245	1.26327	0.767356	0.990103	0.537302	1.12285	1.30587	0.619532	0.175969	0.374385	0.024087	1.11582	0.212261	-0.11219	-0.00243	-0.22336	0.45501	-0.62824
2.2007	1.89308	1.61619	1.06275	1.80722	1.80494	2.28622	1.68321	1.43269	0.480049	1.40811	1.22499	0.764383	0.898248	1.1029	1.42213	0.572377	0.007526	1.2025	0.825989	1.00671	0.527024	1.07455	1.29815	0.62922	0.185355	0.360505	-0.05347	1.14449	0.223565	-0.12064	0.008143	-0.28006	0.508332	-0.56938
2.20956	1.89296	1.63146	1.06588	1.81558	1.81733	2.2515	1.61288	1.43576	0.522159	1.34939	1.16494	0.785288	0.909411	1.10432	1.36824	0.550262	0.058898	1.14715	0.880077	1.02271	0.515481	0.997386	1.23661	0.620258	0.158299	0.36634	-0.09315	1.12864	0.212522	-0.128	-0.02883	-0.2904	0.541431	-0.48129
2.17739	1.89249	1.63789	1.06318	1.86131	1.82261	2.2592	1.5776	1.4664	0.556341	1.31368	1.1545	0.803058	0.932353	1.11986	1.33251	0.519298	0.094305	1.10506	0.9182	1.02332	0.475982	1.05323	1.1873	0.604593	0.175619	0.356631	-0.0978	1.11902	0.216666	-0.15513	-0.09953	-0.24509	0.590971	-0.47319
2.10095	1.92864	1.64695	1.07689	1.92938	1.80128	2.27592	1.6043	1.49051	0.621175	1.28456	1.13051	0.831056	0.96747	1.12127	1.30284	0.539114	0.106724	1.06133	0.899643	1.05528	0.453942	1.10268	1.14495	0.612004	0.168512	0.327448	-0.08271	1.11237	0.197146	-0.18144	-0.14114	-0.22061	0.685828	-0.51565
2.03334	1.93483	1.64663	1.05942	1.9659	1.7658	2.27895	1.69728	1.5074	0.661334	1.30209	1.07864	0.863972	0.962255	1.08743	1.2638	0.512028	0.135338	1.03163	0.931695	1.06417	0.445405	1.14225	1.13849	0.600369	0.166589	0.302279	-0.06461	1.13992	0.16458	-0.20815	-0.23107	-0.25399	0.703476	-0.56192
1.96011	1.92694	1.63502	1.03354	1.98826	1.73472	2.27174	1.81201	1.51409	0.686523	1.29097	1.0421	0.90019	0.96719	1.08755	1.22406	0.498877	0.176357	0.985469	0.903208	1.0783	0.442993	1.12444	1.13862	0.622149	0.178925	0.276142	-0.11048	1.15949	0.127025	-0.22643	-0.24739	-0.29775	0.736037	-0.59849
1.92054	1.94118	1.64734	1.0821	2.01579	1.7046	2.25857	1.83597	1.54853	0.734387	1.28188	1.03178	0.932313	0.990364	1.10675	1.21534	0.465233	0.199495	0.955091	0.888913	1.10215	0.435392	1.08532	1.12839	0.576435	0.17182	0.226141	-0.11723	1.15589	0.109905	-0.23097	-0.30098	-0.31523	0.683272	-0.61453
1.89861	1.97193	1.66065	1.07323	2.08577	1.68447	2.22119	1.85048	1.55002	0.784323	1.27177	1.02883	0.952208	1.00626	1.1352	1.20291	0.461749	0.175526	0.91697	0.728448	1.09767	0.424113	0.997281	1.11729	0.563274	0.227144	0.237048	-0.11419	1.09929	0.167918	-0.26357	-0.25171	-0.30114	0.692057	-0.62092
1.85043	2.00267	1.69101	1.06297	2.1303	1.70121	2.20116	1.80233	1.57377	0.841734	1.28824	0.987834	0.964409	1.03365	1.12983	1.19605	0.397857	0.156214	0.854203	0.615545	1.1266	0.413579	0.94619	1.03228	0.553425	0.169388	0.254273	-0.02931	1.05519	0.217932	-0.31097	-0.26413	-0.26333	0.706106	-0.61877
1.84171	2.00039	1.72012	1.04795	2.14143	1.75215	2.16233	1.85762	1.58781	0.890996	1.32862	0.980522	0.983719	1.06927	1.15368	1.16726	0.394431	0.226717	0.781366	0.56544	1.15508	0.397296	0.951406	0.984473	0.554591	0.177905	0.322824	0.034645	1.00273	0.221314	-0.35323	-0.22239	-0.24996	0.720502	-0.56216
1.84154	2.01797	1.7424	1.085	2.12668	1.78787	2.11293	1.85215	1.61171	0.957311	1.33579	0.981748	1.00446	1.08658	1.18084	1.1589	0.333881	0.258165	0.695035	0.636304	1.1872	0.39681	1.01605	0.961595	0.568252	0.148707	0.325477	0.069985	0.988809	0.150069	-0.38659	-0.23716	-0.29729	0.692973	-0.51991
1.87459	2.01814	1.76231	1.08632	2.0946	1.78248	2.02024	1.85098	1.59813	1.00138	1.31598	0.913808	1.00017	1.07469	1.19819	1.12618	0.329825	0.293121	0.635063	0.710587	1.18985	0.398344	1.04889	0.967973	0.531831	0.223722	0.352074	0.010905	0.999522	0.093513	-0.41169	-0.2154	-0.34262	0.711407	-0.47558
1.88836	2.02714	1.75431	1.06933	2.05749	1.73574	1.94956	1.81906	1.57778	1.03648	1.2615	0.859495	0.967855	1.02869	1.18404	1.10283	0.280819	0.258114	0.588757	0.74684	1.18645	0.393254	1.10546	1.02107	0.475784	0.159995	0.360579	-0.05527	0.980129	0.051021	-0.4246	-0.20747	-0.45609	0.662355	-0.44394
1.88335	2.04608	1.76194	1.04693	2.08696	1.70874	1.93127	1.83339	1.61433	1.07649	1.23045	0.791134	0.963802	1.00463	1.20816	1.12154	0.222002	0.247767	0.544368	0.708907	1.18081	0.360093	1.11219	1.02876	0.431159	0.169285	0.341174	-0.07647	0.976113	0.049048	-0.45272	-0.22736	-0.47941	0.688525	-0.43194
1.90482	2.07666	1.78042	1.07349	2.17276	1.67607	1.97869	1.84334	1.68747	1.16315	1.22282	0.85763	1.00117	1.03991	1.26752	1.15219	0.198712	0.238472	0.530359	0.621078	1.18504	0.352261	1.03949	1.10981	0.440264	0.183925	0.271963	-0.0354	0.947485	0.035725	-0.45378	-0.19182	-0.57664	0.711982	-0.44332
1.95559	2.1024	1.8004	1.07468	2.2519	1.67326	1.97919	1.88105	1.72854	1.19683	1.20806	0.833322	1.03924	1.07115	1.29144	1.14534	0.170626	0.221131	0.507656	0.537198	1.19777	0.333965	0.913911	1.15258	0.426923	0.295585	0.197209	0.012272	0.933662	0.023079	-0.45259	-0.17963	-0.56226	0.783696	-0.48
1.98679	2.12033	1.84103	1.08415	2.27945	1.63002	1.91065	1.85262	1.73376	1.24387	1.22081	0.8328	1.07684	1.11241	1.32595	1.11496	0.200183	0.214877	0.49267	0.612581	1.20878	0.314128	0.739303	1.20497	0.385436	0.35107	0.158222	-0.01116	0.940725	0.01815	-0.43354	-0.10595	-0.52649	0.896894	-0.46375
2.00156	2.12373	1.83717	1.07645	2.27506	1.64958	1.82002	1.89678	1.70706	1.24004	1.18773	0.741641	1.09938	1.10876	1.33976	1.07817	0.186267	0.168477	0.455628	0.704528	1.22575	0.295103	0.713111	1.19152	0.365678	0.40851	0.166021	-0.05531	0.953855	-0.02653	-0.41148	-0.11966	-0.47637	0.894745	-0.41934
2.01135	2.12473	1.84672	1.12761	2.29071	1.68321	1.77067	1.89582	1.67354	1.26998	1.16135	0.761128	1.14101	1.1174	1.35497	1.04201	0.16999	0.188799	0.47789	0.847691	1.20399	0.26936	0.651212	1.19724	0.356079	0.384715	0.151989	-0.07295	0.965111	-0.0301	-0.39469	-0.17046	-0.43816	0.95174	-0.38332
2.05387	2.10356	1.84242	1.20023	2.33118	1.78931	1.83808	1.93172	1.67009	1.27391	1.11489	0.764135	1.16369	1.11246	1.32858	1.00749	0.12252	0.200267	0.516998	0.74731	1.19429	0.284395	0.678063	1.2257	0.35351	0.440749	0.129731	-0.01878	0.911819	-0.05191	-0.39135	-0.16052	-0.4627	0.920602	-0.36546
2.10365	2.08911	1.86792	1.29035	2.36461	1.85826	1.89349	1.9084	1.65737	1.30442	1.11712	0.868921	1.18041	1.12172	1.31902	0.98037	0.066997	0.270472	0.543237	0.73356	1.16292	0.273401	0.70507	1.26034	0.282338	0.463608	0.095056	0.004181	0.891491	-0.02382	-0.41984	-0.21651	-0.43968	1.01848	-0.39773
2.12643	2.06228	1.88172	1.36137	2.32401	1.94488	1.97617	1.92569	1.62075	1.34178	1.12372	0.979568	1.17441	1.11649	1.31457	0.972679	0.02379	0.312935	0.573971	0.64642	1.18338	0.284506	0.715324	1.25652	0.28002	0.511847	0.10161	-0.01111	0.892167	-0.0874	-0.45102	-0.16408	-0.43887	1.0392	-0.40142
2.1068	2.03322	1.89566	1.41311	2.26174	1.96872	1.94748	1.95351	1.55255	1.38175	1.14347	1.05523	1.17694	1.10203	1.31543	0.957744	0.026201	0.447622	0.568235	0.736709	1.19006	0.261916	0.636379	1.25423	0.353704	0.528756	0.115277	0.002511	0.880036	-0.13326	-0.48079	-0.16439	-0.40643	1.04076	-0.38207
2.07787	2.00878	1.89148	1.44619	2.2148	1.9883	1.88907	1.96534	1.47579	1.41519	1.11958	1.11206	1.1851	1.06549	1.28256	0.940153	0.023852	0.575399	0.566823	0.816268	1.19346	0.245356	0.480461	1.26386	0.404259	0.506695	0.097652	0.010831	0.839999	-0.20233	-0.49594	-0.10407	-0.38901	0.920072	-0.36006
2.10621	1.98537	1.90137	1.41733	2.24524	1.95701	1.81548	1.98557	1.44546	1.44256	1.11084	1.08043	1.20986	1.04768	1.25317	0.909519	0.040832	0.675519	0.509318	0.865267	1.19419	0.227573	0.278247	1.31961	0.472435	0.529353	0.074391	0.047124	0.812519	-0.19706	-0.49937	-0.15047	-0.43204	0.878785	-0.4129
2.14852	1.97292	1.90503	1.39519	2.25245	1.95654	1.74839	1.97063	1.40954	1.47672	1.07339	1.04211	1.22106	1.04307	1.23788	0.90918	0.035745	0.713444	0.468237	0.918545	1.1914	0.226199	0.212878	1.33306	0.448954	0.503202	0.052547	0.012054	0.820412	-0.20301	-0.49596	-0.22618	-0.49049	0.89731	-0.44828
2.22759	1.95284	1.93538	1.42219	2.23896	2.00552	1.71419	1.98757	1.38778	1.51943	1.08736	1.06088	1.24771	1.02519	1.24712	0.8954	0.025894	0.71281	0.428094	0.977838	1.21892	0.221557	0.154871	1.33237	0.477842	0.51076	0.029305	0.057004	0.842703	-0.22024	-0.48207	-0.31391	-0.50604	0.985292	-0.43087
2.27879	1.9546	1.96106	1.46455	2.22068	2.05818	1.59397	1.97117	1.36501	1.54583	1.09963	1.06435	1.26651	1.02757	1.25452	0.871211	0.018163	0.735615	0.421046	1.11752	1.24486	0.214088	0.212297	1.27194	0.423981	0.563292	0.021332	0.014481	0.823011	-0.23336	-0.51935	-0.33214	-0.4923	0.974202	-0.346
2.31933	1.96043	1.97828	1.49461	2.23102	2.10666	1.54709	2.00653	1.36096	1.58087	1.12614	1.12215	1.31698	1.04945	1.24887	0.855279	0.016898	0.782515	0.438069	1.1662	1.29409	0.190578	0.229198	1.21619	0.383849	0.583399	-0.03276	-0.00739	0.779081	-0.24781	-0.55542	-0.28831	-0.48267	0.972742	-0.30118
2.36586	1.97871	1.96915	1.48799	2.25349	2.11394	1.44362	2.07134	1.37086	1.59866	1.15323	1.08162	1.3398	1.04902	1.21603	0.846372	0.028354	0.898966	0.513275	1.25096	1.3015	0.176178	0.223492	1.11369	0.340645	0.540482	-0.08444	-0.04262	0.721258	-0.25308	-0.61226	-0.17585	-0.54976	0.868673	-0.27337
2.39349	1.98414	1.95856	1.49786	2.28915	2.13281	1.43377	2.14537	1.38248	1.62043	1.21015	1.14626	1.38287	1.04147	1.20424	0.821387	0.034099	0.923915	0.61914	1.2933	1.31495	0.157466	0.257331	0.980965	0.324183	0.522363	-0.13729	-0.0475	0.652835	-0.2399	-0.59144	-0.01669	-0.55017	0.820762	-0.23161
2.42509	1.97917	1.96064	1.50765	2.29532	2.15676	1.4763	2.20708	1.39524	1.62116	1.23029	1.14245	1.39986	1.00171	1.1974	0.754836	0.018443	0.894475	0.666816	1.28753	1.31089	0.138374	0.261815	0.831328	0.29634	0.509465	-0.13096	-0.05672	0.602363	-0.22149	-0.5807	0.084044	-0.4977	0.763988	-0.15944
2.43802	1.98152	1.98682	1.53145	2.29106	2.20167	1.51494	2.19179	1.40431	1.64717	1.22929	1.17788	1.42246	1.03085	1.21664	0.743105	0.056648	0.834919	0.726582	1.31481	1.31691	0.121629	0.281535	0.778842	0.334481	0.518396	-0.12165	-0.06996	0.523316	-0.19686	-0.49355	0.142965	-0.41084	0.770519	-0.09419
2.41967	1.99297	2.02614	1.55536	2.2677	2.26241	1.48605	2.12487	1.43892	1.6558	1.18294	1.15894	1.41045	1.05915	1.20713	0.774807	0.086408	0.791618	0.750346	1.38804	1.32461	0.094791	0.221618	0.77916	0.401893	0.542962	-0.13342	-0.06059	0.49006	-0.19889	-0.46814	0.174637	-0.36028	0.828897	-0.04156
2.44304	1.99746	2.04134	1.6247	2.25203	2.32234	1.40625	2.03788	1.43052	1.68175	1.1568	1.15482	1.41727	1.09763	1.19143	0.78392	0.163473	0.758651	0.830114	1.56118	1.3078	0.094192	0.172277	0.829002	0.50679	0.559178	-0.13332	0.010127	0.472058	-0.1982	-0.38985	0.18946	-0.44271	0.791553	0.005321
2.43873	2.00539	2.04739	1.66541	2.26613	2.37118	1.36098	2.01193	1.44433	1.67735	1.15154	1.16647	1.4297	1.10062	1.17333	0.740186	0.171625	0.686002	0.824906	1.58677	1.31695	0.090505	0.246181	0.868125	0.472821	0.654963	-0.12353	0.037802	0.500987	-0.18149	-0.36333	0.204295	-0.48303	0.791557	-0.02537
2.39275	2.01793	2.04443	1.69253	2.27838	2.37997	1.39281	2.04213	1.45242	1.69291	1.15364	1.16573	1.45187	1.09196	1.17322	0.673822	0.188187	0.66249	0.821335	1.49597	1.29362	0.112068	0.340393	0.911433	0.432513	0.666534	-0.0907	0.096788	0.536865	-0.12669	-0.31148	0.154974	-0.49888	0.724724	-0.0792
2.30342	2.02149	2.05448	1.66999	2.28426	2.37136	1.46036	2.07512	1.47574	1.69273	1.17168	1.16326	1.44681	1.09523	1.17501	0.637909	0.153751	0.71999	0.786762	1.21802	1.29731	0.101222	0.504516	0.904334	0.335558	0.657893	-0.06675	0.089368	0.550716	-0.078	-0.29971	0.141032	-0.38001	0.739161	-0.22377
2.23948	2.01833	2.06494	1.68311	2.27042	2.36891	1.50338	2.09323	1.46846	1.70651	1.15948	1.09453	1.44712	1.07639	1.16772	0.618884	0.15139	0.715475	0.80588	1.07519	1.2857	0.075835	0.581529	0.85677	0.333473	0.663533	-0.04572	0.046153	0.527645	-0.04117	-0.27613	0.133013	-0.31054	0.726423	-0.24592
2.22215	2.02953	2.07775	1.69402	2.28905	2.34794	1.53934	2.08318	1.46466	1.74869	1.1653	1.00987	1.45999	1.08252	1.1644	0.606759	0.125669	0.767958	0.808196	0.987992	1.2996	0.037181	0.583539	0.801196	0.34292	0.670644	-0.01942	-0.01622	0.489516	-0.0681	-0.26663	0.183473	-0.27832	0.74481	-0.26624
2.22095	2.02968	2.11553	1.71954	2.28141	2.3334	1.45668	2.08296	1.46405	1.78446	1.1785	0.951969	1.46989	1.08468	1.14913	0.653773	0.127178	0.70872	0.824787	1.13403	1.34194	0.039906	0.593076	0.807221	0.389977	0.733961	-0.02023	-0.03292	0.484038	-0.08123	-0.25581	0.170931	-0.26848	0.720783	-0.25281
2.208	2.02006	2.16002	1.71348	2.27997	2.28863	1.44362	2.08123	1.50371	1.82017	1.17639	0.934756	1.47806	1.10834	1.17361	0.663847	0.142851	0.746228	0.842079	1.09568	1.36249	0.05902	0.564028	0.778069	0.448722	0.720474	-0.00578	-0.00682	0.486921	-0.10997	-0.25977	0.15336	-0.241	0.679144	-0.27377
2.19313	2.01089	2.20753	1.69461	2.26437	2.26805	1.38703	2.09553	1.54677	1.83748	1.14892	0.869268	1.48311	1.10564	1.18778	0.678032	0.202408	0.705321	0.840261	1.06431	1.36554	0.107294	0.62785	0.748213	0.499305	0.732886	-0.02273	-0.00312	0.429254	-0.13511	-0.25831	0.149731	-0.21905	0.655	-0.26003
2.1763	2.01625	2.22154	1.65247	2.28593	2.24559	1.36645	2.09599	1.5832	1.85814	1.1119	0.820663	1.4925	1.13113	1.22854	0.623664	0.259831	0.760641	0.837565	0.964626	1.34028	0.12219	0.702679	0.728065	0.591749	0.696519	-0.01278	-0.0673	0.324057	-0.19674	-0.24799	0.201352	-0.18895	0.607245	-0.21163
2.13805	2.024	2.2237	1.63675	2.3122	2.20495	1.32835	2.12374	1.56158	1.84823	1.08794	0.806348	1.50198	1.17213	1.20585	0.61578	0.251055	0.838249	0.787024	0.956617	1.32046	0.121768	0.771958	0.766918	0.606811	0.695347	-0.03412	-0.12816	0.288182	-0.23106	-0.29734	0.365293	-0.17737	0.663577	-0.14941
2.13074	2.01078	2.21408	1.61182	2.3288	2.1865	1.27236	2.11962	1.51584	1.84892	1.08474	0.79418	1.50645	1.22657	1.16887	0.589526	0.23696	0.956992	0.71156	0.958521	1.3161	0.108752	0.758688	0.80393	0.633419	0.655736	0.002798	-0.17317	0.34313	-0.24775	-0.32639	0.443009	-0.16514	0.659818	-0.13095
2.11354	2.01605	2.22263	1.63724	2.31607	2.17664	1.21217	2.07373	1.49734	1.86143	1.08597	0.822299	1.50746	1.2489	1.1567	0.596544	0.236209	1.10196	0.667507	1.04958	1.30763	0.127006	0.667082	0.808158	0.621562	0.589083	0.008574	-0.18626	0.400003	-0.25237	-0.34639	0.475941	-0.18872	0.68092	-0.16323
2.15539	2.01357	2.22944	1.65357	2.29666	2.16977	1.1885	1.97731	1.51384	1.90485	1.08084	0.79702	1.49159	1.24027	1.16287	0.605792	0.262956	1.18889	0.612128	1.008	1.2937	0.133417	0.566212	0.858252	0.682369	0.562099	-0.00254	-0.18194	0.431285	-0.27021	-0.3488	0.419554	-0.19628	0.606105	-0.25041
2.15201	2.02155	2.24911	1.69054	2.26419	2.1315	1.18507	1.93338	1.55738	1.9514	1.05093	0.809395	1.49237	1.22059	1.21255	0.628067	0.290701	1.28341	0.592558	1.018	1.26733	0.145411	0.542785	0.912843	0.681932	0.507976	-0.07567	-0.15485	0.449567	-0.28978	-0.38516	0.400809	-0.20101	0.58042	-0.31459
2.172	2.02135	2.25364	1.69395	2.25612	2.09872	1.20427	1.93099	1.57915	1.96906	1.02379	0.784677	1.51915	1.2129	1.23223	0.571071	0.308839	1.29598	0.536988	0.906768	1.2483	0.114695	0.464101	0.867368	0.650055	0.507485	-0.08077	-0.14366	0.484948	-0.29969	-0.45264	0.42561	-0.19763	0.53065	-0.27516
2.10196	2.04391	2.26638	1.6606	2.27016	2.07491	1.1568	1.93187	1.5657	1.97903	1.00278	0.719892	1.55751	1.2173	1.2503	0.485919	0.347922	1.32539	0.473305	0.884935	1.20476	0.120216	0.436424	0.801544	0.657767	0.480019	-0.01553	-0.1322	0.481709	-0.24131	-0.47904	0.440902	-0.26119	0.516036	-0.15338
2.10768	2.03411	2.27003	1.67487	2.30373	2.05876	1.16962	1.95593	1.54586	1.9742	1.03002	0.733494	1.57171	1.21585	1.23261	0.411346	0.343487	1.31514	0.437271	0.847702	1.17215	0.11857	0.404401	0.697414	0.684068	0.505442	0.058146	-0.06315	0.47705	-0.1791	-0.49646	0.467631	-0.28749	0.482235	-0.07507
2.07706	2.04137	2.25898	1.73433	2.32175	2.01525	1.18221	2.00195	1.48702	1.97685	1.05535	0.703562	1.57881	1.18471	1.18692	0.393082	0.374661	1.35513	0.409005	0.808824	1.11547	0.15095	0.413833	0.74174	0.801053	0.582306	0.057738	0.013604	0.470977	-0.11837	-0.49452	0.473763	-0.31987	0.477161	-0.03559
2.11742	2.03937	2.26194	1.8112	2.29171	1.99601	1.22593	2.06216	1.47968	1.99137	1.0898	0.751841	1.58658	1.17553	1.16947	0.411694	0.416417	1.29371	0.470791	0.812463	1.1242	0.166663	0.372201	0.747321	0.830564	0.599065	0.032206	0.083122	0.43933	-0.15388	-0.47904	0.433741	-0.32849	0.474875	-0.02273
2.09381	2.0484	2.26623	1.84117	2.23609	2.01381	1.18442	2.06913	1.43491	1.9945	1.09061	0.758694	1.58781	1.18809	1.15657	0.432963	0.465605	1.20796	0.561302	0.832856	1.10277	0.167158	0.328196	0.758675	0.906154	0.625036	0.014988	0.096419	0.381454	-0.15349	-0.51569	0.370136	-0.41181	0.514883	-0.01368
2.1616	2.0512	2.28427	1.83612	2.20283	2.07326	1.12722	2.05337	1.44989	2.01239	1.09341	0.733998	1.57668	1.22734	1.16529	0.481746	0.526966	1.09462	0.69098	0.894463	1.13647	0.157014	0.326054	0.717954	0.889052	0.526078	-0.00274	0.124123	0.351813	-0.19964	-0.52603	0.328543	-0.47233	0.499432	-0.05181
2.1578	2.05671	2.28521	1.84017	2.18835	2.12532	1.08914	2.07447	1.47124	2.02594	1.09727	0.696259	1.58441	1.26607	1.15569	0.505915	0.5388	1.06378	0.769674	0.930602	1.14963	0.144783	0.336679	0.675976	0.914214	0.515595	0.00149	0.153651	0.346736	-0.19475	-0.56532	0.317223	-0.51284	0.515684	-0.12613
2.20396	2.0727	2.28855	1.88062	2.18416	2.18272	1.07885	2.09074	1.53664	2.04245	1.07778	0.695578	1.60869	1.27164	1.15845	0.503258	0.573766	1.08167	0.834957	0.968772	1.18092	0.139952	0.369239	0.656747	0.938952	0.511975	-0.00329	0.164097	0.346353	-0.2552	-0.55658	0.284409	-0.5114	0.465937	-0.11342
2.14577	2.07607	2.29218	1.9302	2.14576	2.22658	1.10827	2.07796	1.59288	2.05215	1.06666	0.720565	1.61655	1.26685	1.15835	0.459148	0.559424	1.03711	0.872451	0.956629	1.1646	0.1368	0.298379	0.638406	0.992347	0.550073	0.013312	0.178964	0.328012	-0.26876	-0.57668	0.268489	-0.52066	0.467399	-0.06763
2.14843	2.06468	2.28651	1.95902	2.16977	2.26866	1.04375	2.08348	1.63939	2.05195	1.06416	0.758984	1.60823	1.26729	1.16391	0.397576	0.556145	1.0065	0.932169	1.01855	1.12725	0.142507	0.27989	0.603838	0.993359	0.615665	0.020253	0.15187	0.326108	-0.28878	-0.56335	0.256596	-0.51389	0.418236	0.062648
2.15583	2.07286	2.29165	1.95978	2.19296	2.27905	0.99128	2.13164	1.67567	2.07048	1.08274	0.699915	1.60203	1.29101	1.19939	0.42764	0.563195	0.92689	0.958848	1.0614	1.07394	0.155664	0.208983	0.593103	0.961468	0.604812	-0.03895	0.139147	0.289673	-0.30764	-0.53736	0.306532	-0.53508	0.437515	0.109078
2.18805	2.09933	2.28726	1.96531	2.25431	2.27816	0.905066	2.22115	1.73373	2.08411	1.09016	0.694697	1.62136	1.32408	1.23889	0.433831	0.587955	0.879914	0.963351	1.16653	1.01878	0.145749	0.262975	0.536555	0.894279	0.683205	-0.11301	0.091424	0.260233	-0.31917	-0.50169	0.287618	-0.50636	0.462051	0.10543
2.18188	2.13369	2.30033	2.0028	2.2393	2.28755	0.950709	2.25859	1.78795	2.08394	1.05275	0.679597	1.61909	1.34213	1.26003	0.473462	0.627114	0.845448	0.95558	1.13481	0.957433	0.12751	0.254696	0.518947	0.816412	0.677659	-0.16277	0.071047	0.224726	-0.29351	-0.50315	0.315818	-0.43912	0.451171	0.110958
2.1938	2.13065	2.29648	2.02283	2.20792	2.27463	0.978691	2.20312	1.8294	2.07106	1.01905	0.682102	1.59473	1.35457	1.24672	0.457317	0.664454	0.794063	0.933324	1.06874	0.898174	0.096553	0.281602	0.46529	0.776552	0.699929	-0.13322	0.080939	0.205075	-0.22765	-0.50149	0.306015	-0.40385	0.377506	0.158407
2.24541	2.12164	2.31481	2.00594	2.18012	2.26549	0.967549	2.21371	1.84163	2.07966	0.981605	0.722228	1.58941	1.40481	1.24178	0.501008	0.706528	0.74103	0.902398	0.975984	0.873448	0.09697	0.240583	0.456	0.754729	0.741751	-0.12583	0.135177	0.178803	-0.22175	-0.47034	0.336884	-0.40368	0.358594	0.205934
2.23747	2.09959	2.31871	1.9631	2.18772	2.24647	0.97932	2.1548	1.84764	2.09343	0.97807	0.741021	1.60189	1.44884	1.24734	0.539	0.80939	0.729458	0.842424	0.927666	0.860337	0.099772	0.349007	0.428222	0.828846	0.782095	-0.16349	0.21361	0.12925	-0.26254	-0.43507	0.399641	-0.45427	0.346619	0.196553
2.17304	2.1063	2.33049	1.96733	2.2077	2.24212	1.00603	2.22049	1.8557	2.11469	0.98811	0.8228	1.63988	1.49546	1.23821	0.574704	0.908782	0.709848	0.774512	0.862228	0.854751	0.126866	0.451949	0.43112	0.86711	0.793387	-0.20506	0.250684	0.120117	-0.31668	-0.38534	0.492508	-0.44552	0.362917	0.183005
2.07448	2.10935	2.3226	2.00385	2.21541	2.21557	1.1117	2.18337	1.82602	2.10965	0.988831	0.921847	1.65281	1.48128	1.2086	0.534072	1.06818	0.784641	0.747771	0.815639	0.820711	0.174906	0.567028	0.381956	0.887904	0.7443	-0.20258	0.242204	0.095672	-0.33007	-0.34326	0.571649	-0.4678	0.311507	0.208479
2.08063	2.10387	2.34155	2.04863	2.21418	2.15575	1.15385	2.28574	1.75867	2.12649	0.978865	1.01484	1.67553	1.46546	1.18023	0.478209	1.19384	0.768077	0.776223	0.76678	0.790333	0.272826	0.502834	0.33268	0.872971	0.746456	-0.20079	0.254422	0.069577	-0.34501	-0.28469	0.618116	-0.50835	0.29627	0.318458
2.07474	2.08852	2.34227	2.03804	2.23019	2.11942	1.24526	2.30116	1.67614	2.145	0.961454	1.05888	1.6775	1.42629	1.14281	0.420279	1.3388	0.878023	0.804696	0.673484	0.786038	0.381761	0.476148	0.21548	0.853482	0.770862	-0.22602	0.259011	0.001911	-0.36097	-0.22311	0.625767	-0.51465	0.33476	0.481989
2.10757	2.06862	2.35702	2.02838	2.25093	2.134	1.31244	2.38909	1.62565	2.17109	0.968503	0.99143	1.6991	1.43252	1.1501	0.376678	1.38054	0.956334	0.802587	0.563462	0.771871	0.470627	0.538725	0.24986	0.848906	0.781766	-0.25857	0.301915	-0.06875	-0.34403	-0.18466	0.685819	-0.50021	0.355948	0.702548
2.14557	2.06564	2.34563	2.01072	2.22961	2.14892	1.36745	2.30067	1.58553	2.16229	0.963138	0.958425	1.68235	1.45492	1.14911	0.327098	1.40858	1.08961	0.768642	0.484067	0.733923	0.536897	0.582335	0.273397	0.848855	0.658484	-0.25553	0.301279	-0.08404	-0.33722	-0.17313	0.751387	-0.46003	0.291068	0.71727
2.18512	2.0526	2.34238	1.9795	2.21057	2.11228	1.3909	2.26978	1.57548	2.15691	0.943706	0.890429	1.69438	1.5078	1.17512	0.276983	1.39763	1.12239	0.737065	0.480113	0.690586	0.59624	0.602529	0.306743	0.844758	0.595967	-0.2748	0.286779	-0.05251	-0.34	-0.18773	0.823804	-0.47331	0.165064	0.685771
2.15523	2.04546	2.33181	1.96979	2.19582	2.04658	1.35338	2.20904	1.54892	2.14846	0.902017	0.838464	1.67405	1.51741	1.15883	0.26136	1.45483	1.12773	0.723686	0.570115	0.649517	0.638772	0.592722	0.316486	0.855289	0.509118	-0.28637	0.242649	0.013413	-0.3498	-0.19007	0.907887	-0.58933	0.142649	0.618609
2.13782	2.04022	2.3293	1.95905	2.17797	2.00829	1.30151	2.29954	1.5263	2.15187	0.888262	0.784596	1.6912	1.4925	1.1936	0.233227	1.47966	1.08848	0.687874	0.580194	0.672541	0.662132	0.671817	0.296871	0.912396	0.562113	-0.29601	0.253514	0.036354	-0.34076	-0.17792	0.920732	-0.62391	0.1154	0.680312
2.08094	2.05315	2.32757	1.9727	2.16173	1.99738	1.24929	2.3216	1.47559	2.14094	0.890446	0.815513	1.68527	1.46101	1.19677	0.174244	1.56472	1.10092	0.68993	0.575767	0.680572	0.679485	0.761358	0.286911	0.996987	0.657181	-0.2324	0.299187	0.046056	-0.31201	-0.10906	0.899178	-0.55893	0.116616	0.729169
2.10733	2.03429	2.30792	1.97813	2.14369	1.96782	1.25919	2.3164	1.43136	2.11611	0.911078	0.861145	1.68343	1.43642	1.18853	0.083037	1.61033	1.03069	0.710954	0.500133	0.673964	0.703445	0.684727	0.193241	0.963819	0.756605	-0.16908	0.341666	-0.00383	-0.2984	-0.02559	0.84571	-0.40489	0.040548	0.799305
2.13636	2.01283	2.2785	2.0332	2.13461	1.94611	1.23412	2.3025	1.36401	2.08978	0.931525	0.89378	1.67616	1.41301	1.15202	-0.03747	1.69385	0.978134	0.740417	0.567774	0.654239	0.713108	0.637072	0.170056	0.865739	0.750015	-0.10265	0.345877	-0.02354	-0.30256	0.055925	0.896424	-0.20047	-0.01558	0.930369
2.17655	1.98226	2.25845	2.07736	2.13808	1.90234	1.21183	2.25392	1.32835	2.09294	0.955848	0.902492	1.68124	1.40683	1.15106	-0.0913	1.76824	1.00929	0.76554	0.581054	0.614408	0.716362	0.594343	0.147269	0.827526	0.603303	-0.06401	0.326126	-0.05798	-0.30052	0.12867	0.992929	-0.07635	-0.10385	1.03046
2.16565	1.97783	2.26049	2.13403	2.11144	1.87485	1.18342	2.25386	1.29947	2.09448	0.977577	0.882079	1.68626	1.39452	1.14075	-0.07654	1.86345	1.10173	0.768643	0.597891	0.572922	0.746162	0.562329	0.142098	0.921003	0.543056	-0.02747	0.324784	-0.06264	-0.2927	0.20452	1.11559	-0.02535	-0.14827	1.07987
2.08701	1.96536	2.26017	2.18509	2.08565	1.84983	1.1622	2.22545	1.27531	2.09859	1.01172	0.838553	1.66153	1.41742	1.10515	-0.00886	1.96656	1.20528	0.757867	0.650785	0.565034	0.759074	0.416252	0.082486	0.99968	0.496849	0.019136	0.280869	-0.09563	-0.3009	0.34216	1.16181	-0.00411	-0.17596	1.01801
2.05716	1.94344	2.25353	2.28336	2.03409	1.84187	1.17639	2.25524	1.23476	2.07963	1.03088	0.79448	1.63989	1.41473	1.04105	0.043159	1.96704	1.23762	0.708273	0.724442	0.578837	0.75735	0.34163	0.09939	1.03289	0.535393	0.036483	0.341152	-0.05476	-0.32658	0.532466	1.10932	-0.0197	-0.14209	0.955736
1.9779	1.92399	2.24469	2.35275	2.00131	1.7909	1.19799	2.23009	1.23783	2.07534	1.05658	0.839972	1.61512	1.42451	1.01874	0.114187	1.97163	1.29007	0.624716	0.770889	0.589387	0.733164	0.28726	0.085969	1.02393	0.442328	0.038312	0.350789	-0.06771	-0.36029	0.681642	1.09533	0.12832	-0.14188	0.953135
1.91592	1.93378	2.21644	2.37834	1.98829	1.71098	1.25199	2.18109	1.27323	2.08625	1.05668	0.898345	1.61305	1.38775	1.0007	0.179314	1.95253	1.2605	0.547974	0.705233	0.528767	0.741354	0.344386	0.108197	1.07727	0.367768	0.017278	0.372489	-0.10168	-0.35387	0.849185	1.13985	0.205901	-0.14339	0.971363
1.90498	1.94379	2.19906	2.39056	1.92428	1.63253	1.21955	2.0597	1.32862	2.08009	1.06274	0.905809	1.57496	1.34947	0.987691	0.273487	1.92613	1.24464	0.480473	0.715471	0.471864	0.782044	0.281188	0.120606	1.07895	0.276271	0.015034	0.313863	-0.17124	-0.33381	0.907241	1.25868	0.324328	-0.22095	1.04933
1.92928	1.9491	2.18695	2.36506	1.84256	1.56762	1.18891	1.99967	1.33387	2.07409	1.03731	0.870269	1.54789	1.31568	0.96521	0.329944	1.87653	1.19995	0.455311	0.669295	0.464054	0.844053	0.233708	0.088271	1.13122	0.316289	0.011845	0.281099	-0.16307	-0.26298	0.977667	1.26912	0.347736	-0.26013	0.999352
1.95849	1.92874	2.18833	2.37257	1.76218	1.53661	1.17099	1.91847	1.31373	2.03635	1.0468	0.848805	1.51761	1.29587	0.925314	0.369398	1.86698	1.25861	0.417336	0.65382	0.462076	0.911326	0.216289	0.06359	1.10619	0.338446	0.002079	0.306136	-0.11528	-0.2228	1.00627	1.04895	0.304206	-0.27681	0.941771
1.90903	1.91919	2.15702	2.33362	1.72372	1.48257	1.15738	1.91984	1.23212	2.00954	1.02237	0.864268	1.48887	1.27559	0.870879	0.344407	1.95364	1.23446	0.378441	0.592941	0.420551	0.979731	0.128705	-0.04084	1.1016	0.323797	0.024468	0.318635	-0.12041	-0.1763	1.09688	0.759277	0.217633	-0.3566	0.808299
1.86767	1.9144	2.12187	2.30486	1.71243	1.45886	1.1065	1.87099	1.16464	1.99505	1.02421	0.893436	1.47439	1.23746	0.790231	0.292043	2.00075	1.24695	0.302908	0.609675	0.361823	1.04357	0.054559	-0.0319	1.07855	0.110674	0.073645	0.324879	-0.14634	-0.17421	1.17176	0.514148	0.18698	-0.45286	0.744616
1.83091	1.91181	2.09899	2.26866	1.69325	1.38973	1.0044	1.84995	1.12445	2.01972	0.998055	0.912925	1.46604	1.22791	0.731254	0.323838	2.02282	1.27426	0.249358	0.692268	0.315873	1.11459	-0.11787	-0.07066	1.02264	-0.03228	0.062825	0.273117	-0.09184	-0.1526	1.26541	0.422337	0.212729	-0.51257	0.654802
1.85122	1.88625	2.08437	2.27816	1.62629	1.34048	0.953141	1.81559	1.07246	2.02678	0.990816	0.973996	1.45845	1.19024	0.675968	0.356008	1.98047	1.31689	0.187225	0.709045	0.34077	1.15194	-0.23192	0.018925	0.879158	-0.1743	-0.01769	0.185698	0.010534	-0.16477	1.30715	0.438792	0.271247	-0.59798	0.60729
1.87932	1.84773	2.07428	2.30145	1.56271	1.28576	0.91824	1.77133	1.03761	2.01459	0.956151	0.973753	1.43386	1.1561	0.632408	0.390936	1.94316	1.38523	0.140887	0.764321	0.36128	1.18021	-0.22507	0.037626	0.704896	-0.14653	-0.0591	0.177288	0.112195	-0.2079	1.32101	0.518858	0.341119	-0.65529	0.55389
1.82771	1.8087	2.05716	2.28041	1.45873	1.25497	0.927093	1.69838	1.00978	2.00715	0.877159	0.906728	1.39706	1.11767	0.596732	0.430972	1.8651	1.45908	0.095664	0.674058	0.419188	1.18614	-0.20314	0.10737	0.561075	-0.11481	-0.11461	0.141683	0.142045	-0.21669	1.26076	0.596417	0.559665	-0.70171	0.58318
1.76275	1.80073	2.03439	2.29907	1.41075	1.22274	0.944774	1.64904	1.00485	1.99783	0.799875	0.796005	1.38112	1.09548	0.578409	0.425383	1.85174	1.57272	0.043019	0.638688	0.423191	1.19386	-0.14034	0.0702	0.495039	-0.03216	-0.10711	0.190859	0.137952	-0.23154	1.19986	0.581161	0.768343	-0.71704	0.520596
1.67453	1.79031	2.01819	2.30633	1.32675	1.21106	0.93214	1.64943	0.960703	1.99619	0.731542	0.763923	1.35022	1.08432	0.572019	0.481037	1.8157	1.61757	-0.0004	0.566605	0.434112	1.19051	-0.09852	0.045752	0.383192	0.038835	-0.17692	0.165821	0.153698	-0.22315	1.2177	0.423569	0.934859	-0.76977	0.435598
1.69541	1.77374	1.99721	2.37266	1.31439	1.19253	0.972824	1.65263	0.913413	1.97016	0.67767	0.782046	1.34544	1.08127	0.546301	0.462542	1.86401	1.67515	-0.03929	0.44869	0.417057	1.20937	-0.07481	0.024153	0.366683	0.074302	-0.177	0.170403	0.157131	-0.27879	1.28215	0.289433	0.924006	-0.80645	0.337738
1.66113	1.74156	1.99415	2.42385	1.32037	1.16057	1.00181	1.6599	0.873161	1.92874	0.650646	0.794723	1.32971	1.1121	0.535546	0.472697	1.84884	1.68719	-0.04977	0.420475	0.390791	1.25016	-0.05729	0.098632	0.313771	0.140742	-0.15154	0.180493	0.161633	-0.307	1.33527	0.248461	0.96997	-0.76682	0.362889
1.58884	1.726	1.99844	2.46881	1.35306	1.10314	1.08265	1.61918	0.846587	1.92339	0.596103	0.720217	1.33331	1.14014	0.531798	0.420105	1.87075	1.69729	-0.07598	0.327104	0.396075	1.28555	-0.08993	0.20692	0.288289	0.249551	-0.06928	0.241086	0.134405	-0.34783	1.3359	0.257929	0.968114	-0.73704	0.367869
1.44852	1.69799	1.99323	2.48738	1.3698	1.05394	1.09869	1.59933	0.782457	1.90183	0.589665	0.6353	1.32703	1.17076	0.547795	0.399954	1.82995	1.70597	-0.10825	0.314546	0.394231	1.28283	-0.04767	0.294603	0.201474	0.295634	-0.04629	0.29569	0.062188	-0.34466	1.33277	0.27317	0.943898	-0.69524	0.369087
1.2908	1.65111	1.98551	2.41955	1.31731	1.0317	1.06476	1.53419	0.739111	1.91239	0.535762	0.523478	1.32242	1.1859	0.53882	0.363835	1.80446	1.7015	-0.14259	0.317751	0.472306	1.22684	0.121287	0.262019	0.161529	0.287192	-0.03106	0.251832	0.022232	-0.36822	1.34487	0.230638	0.867218	-0.69087	0.370229
1.1965	1.6205	1.95187	2.4128	1.30878	1.03028	1.01845	1.4211	0.684721	1.896	0.516086	0.467378	1.31473	1.23282	0.527759	0.393588	1.78906	1.7151	-0.16252	0.325255	0.471839	1.16588	0.291334	0.207722	0.193854	0.280934	-0.07269	0.233587	-0.01292	-0.29056	1.37106	0.268292	0.880635	-0.68572	0.418722
1.16386	1.58482	1.93766	2.40285	1.30083	1.00883	0.972352	1.38365	0.682629	1.88572	0.481193	0.431317	1.30472	1.23061	0.512907	0.374794	1.79747	1.66113	-0.18345	0.392149	0.469572	1.1112	0.306909	0.122339	0.20543	0.197294	-0.04978	0.285583	-0.02345	-0.29295	1.41473	0.27252	0.968066	-0.74111	0.476738
1.21018	1.56593	1.91835	2.43525	1.31478	0.968229	0.952271	1.33795	0.682013	1.87496	0.47768	0.480767	1.30371	1.25684	0.499991	0.40146	1.79806	1.5757	-0.17739	0.355907	0.411025	1.07739	0.164102	0.108821	0.19301	0.168404	-0.04296	0.416673	-0.06915	-0.27067	1.41698	0.336247	0.998857	-0.74288	0.498326
1.27382	1.51152	1.90902	2.39713	1.27988	0.943899	0.90836	1.36492	0.650768	1.8424	0.473676	0.476155	1.29221	1.2431	0.487902	0.379526	1.75057	1.45071	-0.20432	0.328636	0.424257	1.05116	0.05172	0.059996	0.175284	0.17974	-0.03106	0.501927	-0.09583	-0.36215	1.37685	0.421502	0.990922	-0.77059	0.538739
1.33304	1.48663	1.90278	2.37787	1.24271	0.943699	0.851721	1.31305	0.599069	1.81783	0.459492	0.493829	1.28178	1.27091	0.47622	0.350709	1.66509	1.35333	-0.18644	0.337867	0.419957	1.01551	0.090423	0.029094	0.135488	0.335182	0.022278	0.51097	-0.13392	-0.34788	1.30192	0.38687	1.00746	-0.78203	0.497504
1.38137	1.46093	1.90932	2.34578	1.21948	0.950562	0.82556	1.32103	0.539726	1.80438	0.434397	0.436965	1.26441	1.24392	0.500361	0.287657	1.6132	1.2841	-0.21846	0.332629	0.433569	0.992931	0.078597	0.013826	0.159854	0.510895	0.062359	0.491492	-0.14061	-0.32726	1.26403	0.35173	1.08409	-0.82044	0.537776
1.41425	1.44139	1.9079	2.36599	1.20352	0.930666	0.788679	1.26854	0.506269	1.7791	0.396668	0.42402	1.22147	1.2207	0.494369	0.224205	1.54239	1.23971	-0.19466	0.441617	0.396202	0.946916	-0.02672	-0.00667	0.122802	0.571018	0.15755	0.463125	-0.1314	-0.21718	1.259	0.255659	1.0834	-0.80389	0.535154
1.39024	1.39949	1.91343	2.3465	1.16997	0.8886	0.771608	1.26294	0.475487	1.7505	0.39289	0.414259	1.1998	1.16313	0.499816	0.185459	1.46542	1.21845	-0.21733	0.441964	0.379246	0.905503	-0.18696	0.019796	0.132292	0.685864	0.186822	0.42931	-0.09332	-0.17116	1.24127	0.290916	1.03055	-0.75136	0.568748
1.39927	1.36923	1.91104	2.36533	1.1564	0.865575	0.6705	1.23506	0.46541	1.73757	0.391778	0.367242	1.20546	1.14658	0.475513	0.178107	1.33245	1.16665	-0.18849	0.632755	0.360122	0.83764	-0.27339	0.048226	0.067172	0.667335	0.186997	0.40782	-0.05689	-0.18166	1.22623	0.230099	0.968729	-0.71709	0.534127
1.40273	1.32434	1.9121	2.36205	1.16332	0.837226	0.618911	1.22379	0.450009	1.76009	0.406295	0.359432	1.25205	1.12274	0.46599	0.157624	1.24966	1.10918	-0.14781	0.677285	0.355834	0.785096	-0.24754	0.064964	0.034498	0.664784	0.131701	0.369561	-0.04296	-0.25645	1.19467	0.146134	0.938898	-0.75236	0.479949
1.39609	1.29619	1.8867	2.34216	1.16631	0.805938	0.604418	1.19133	0.421372	1.77331	0.383785	0.294435	1.26761	1.10644	0.425582	0.112683	1.20464	1.04652	-0.11703	0.674852	0.36772	0.754628	-0.21496	0.044736	0.005441	0.572361	0.129947	0.424197	-0.0693	-0.31428	1.16566	0.12086	0.884527	-0.81644	0.488394
1.34566	1.25236	1.8589	2.30396	1.15716	0.758341	0.61404	1.17575	0.376191	1.7687	0.397828	0.252357	1.2628	1.05942	0.402955	0.071479	1.19319	1.06014	-0.12551	0.532775	0.354989	0.770146	-0.17271	-0.02306	0.061777	0.578749	0.170196	0.435257	-0.08357	-0.3224	1.13356	0.182973	0.835433	-0.86641	0.468425
1.23877	1.23387	1.82973	2.22575	1.13243	0.711719	0.617874	1.17584	0.331696	1.72617	0.415185	0.189684	1.23724	1.02572	0.360997	0.030667	1.18659	1.12571	-0.18732	0.432789	0.344863	0.771739	-0.14247	-0.02754	0.069736	0.486729	0.239788	0.458576	-0.1021	-0.32668	1.10708	0.332106	0.80003	-0.85545	0.535179
1.14409	1.20655	1.82653	2.17276	1.12117	0.697753	0.603844	1.20997	0.267778	1.72855	0.430001	0.128946	1.23371	1.00049	0.342363	0.042164	1.21823	1.16146	-0.20378	0.373877	0.309967	0.767947	-0.08376	-0.02749	0.175087	0.445726	0.246289	0.393466	-0.12413	-0.32947	1.12568	0.373297	0.732467	-0.83977	0.64139
1.09935	1.18622	1.76853	2.12675	1.13276	0.668423	0.57702	1.21111	0.220501	1.61283	0.41703	0.140542	1.17894	0.919794	0.25367	-0.00768	1.19016	1.11582	-0.20484	0.409194	0.25196	0.747002	-0.08591	-0.00729	0.15577	0.441573	0.244015	0.324643	-0.17491	-0.31801	1.1098	0.343603	0.652642	-0.82851	0.716394
1.16526	1.15254	1.77122	2.12495	1.0988	0.643535	0.564578	1.17494	0.17203	1.62937	0.375044	0.058617	1.17249	0.869487	0.228437	-0.01292	1.14573	0.97858	-0.19697	0.439339	0.258575	0.735508	-0.13487	-0.00711	0.193553	0.411183	0.234931	0.294174	-0.21725	-0.2987	1.04796	0.309943	0.50877	-0.85907	0.677855
1.20476	1.11947	1.74296	2.141	1.07079	0.618971	0.469346	1.06992	0.170512	1.60125	0.36062	0.009024	1.14604	0.802963	0.202677	-0.05403	0.994682	0.895292	-0.21914	0.577083	0.261206	0.732532	-0.13582	-0.07684	0.157629	0.432263	0.226562	0.271218	-0.21617	-0.26771	0.933623	0.256854	0.460005	-0.84338	0.541445
1.1602	1.10102	1.79458	2.12377	1.00069	0.607158	0.44727	0.947352	0.136285	1.72213	0.32617	0.005907	1.17271	0.830694	0.248351	-0.02727	0.914814	0.902172	-0.21609	0.555566	0.329047	0.722902	-0.05802	-0.16621	0.15312	0.318403	0.249355	0.281301	-0.23051	-0.23931	0.846716	0.30038	0.463639	-0.83248	0.514476
1.03123	1.08347	1.79209	2.06212	0.980662	0.585985	0.41733	0.908121	0.122363	1.72882	0.32436	0.042124	1.15875	0.802569	0.25053	-0.05278	0.882423	0.929451	-0.17565	0.542318	0.33875	0.721049	0.071621	-0.22051	0.187203	0.399754	0.281091	0.223068	-0.24213	-0.21861	0.832958	0.230627	0.498033	-0.82862	0.566799
0.950317	1.07651	1.80021	2.0106	0.949669	0.541049	0.47428	0.84129	0.078616	1.73641	0.308722	0.122171	1.14405	0.778988	0.250764	-0.06997	0.842267	0.921478	-0.11893	0.448676	0.356192	0.713987	0.12354	-0.24284	0.125234	0.443701	0.324761	0.229297	-0.25271	-0.22154	0.738222	0.366669	0.472554	-0.84607	0.673757
0.906889	1.04118	1.76308	1.97341	0.931689	0.513998	0.470052	0.867566	0.052432	1.68668	0.316848	0.117585	1.12051	0.731764	0.230445	-0.13496	0.830926	0.83058	-0.09875	0.422016	0.317915	0.709165	0.090182	-0.24642	0.157358	0.551935	0.360884	0.228804	-0.26598	-0.23187	0.672679	0.459195	0.423393	-0.94916	0.764938
0.890407	1.01283	1.74438	1.95359	0.90403	0.492996	0.44645	0.790722	0.043035	1.68553	0.303541	0.116932	1.11333	0.733666	0.230137	-0.15451	0.786381	0.811648	-0.11894	0.388082	0.314481	0.707541	0.123551	-0.30305	0.174724	0.596231	0.36911	0.239405	-0.27908	-0.24939	0.615907	0.548195	0.434639	-0.93857	0.821591
0.880643	0.984364	1.74096	1.92255	0.890026	0.495098	0.404507	0.78863	0.01646	1.69947	0.277532	0.072547	1.1131	0.750418	0.210886	-0.12996	0.789471	0.826394	-0.1271	0.384001	0.30188	0.672085	0.171169	-0.29911	0.233095	0.615403	0.361794	0.218283	-0.28633	-0.2639	0.625406	0.52016	0.460209	-0.93294	0.856749
0.885615	0.964756	1.76337	1.91671	0.866433	0.493879	0.434522	0.753664	-0.02775	1.74139	0.26264	0.009585	1.13782	0.76748	0.20866	-0.07845	0.745875	0.858979	-0.11052	0.262109	0.334714	0.625757	0.195704	-0.33057	0.233892	0.613317	0.344162	0.198515	-0.22032	-0.29668	0.590437	0.540178	0.515943	-0.85185	0.824262
0.856043	0.939269	1.74553	1.95571	0.85015	0.473396	0.44297	0.80315	-0.10313	1.73695	0.254521	0.009499	1.13875	0.739824	0.166945	-0.0755	0.684717	0.870576	-0.04924	0.272029	0.297088	0.585683	0.067285	-0.31647	0.194369	0.613636	0.324226	0.257524	-0.16064	-0.2994	0.53551	0.525093	0.532483	-0.86098	0.848843
0.848785	0.912714	1.71457	1.94818	0.840008	0.46171	0.462974	0.822407	-0.14706	1.72287	0.241715	-0.00127	1.13944	0.730645	0.167157	-0.12199	0.611654	0.810528	-0.00957	0.186502	0.267293	0.569762	-0.08699	-0.33608	0.182018	0.520797	0.354727	0.342762	-0.08407	-0.29651	0.508453	0.469276	0.579506	-0.91575	0.790587
0.818946	0.882726	1.68605	1.92542	0.846189	0.440363	0.412215	0.803019	-0.17575	1.69608	0.205787	-0.06233	1.11984	0.708309	0.138737	-0.17372	0.57317	0.803572	0.013761	0.237973	0.205513	0.556539	-0.18856	-0.33623	0.179391	0.518223	0.374286	0.42704	-0.07745	-0.274	0.500968	0.371228	0.563491	-0.9071	0.777868
0.809325	0.86075	1.6813	1.88794	0.839504	0.434805	0.411142	0.717029	-0.17868	1.67796	0.177749	-0.11998	1.10589	0.708021	0.151303	-0.22084	0.577719	0.76217	0.03541	0.147238	0.217635	0.54449	-0.2041	-0.38126	0.203086	0.508879	0.459423	0.457541	-0.07408	-0.27835	0.485759	0.398359	0.609844	-0.893	0.737253
0.78436	0.82604	1.68569	1.89985	0.80482	0.409379	0.385644	0.667058	-0.20226	1.65847	0.189065	-0.15021	1.0903	0.68612	0.143761	-0.28508	0.607705	0.715544	0.0472	0.175253	0.201344	0.511325	-0.19947	-0.44402	0.219391	0.644989	0.510576	0.452127	-0.11193	-0.27539	0.473749	0.394209	0.671201	-0.88269	0.752507
0.759845	0.804907	1.67584	1.89971	0.787432	0.376924	0.36137	0.631918	-0.22335	1.62199	0.19197	-0.12228	1.07892	0.664576	0.140708	-0.35216	0.598816	0.5696	0.061963	0.21302	0.16359	0.472228	-0.18534	-0.46806	0.268879	0.700483	0.579552	0.484236	-0.13758	-0.28219	0.464387	0.439157	0.738594	-0.81346	0.743301
0.742165	0.769468	1.68718	1.85908	0.774306	0.360146	0.282294	0.656929	-0.25329	1.60475	0.192007	-0.15387	1.08045	0.647886	0.131855	-0.40891	0.574927	0.56231	0.039305	0.355091	0.109509	0.422927	-0.1543	-0.41676	0.255871	0.794049	0.590612	0.466231	-0.12173	-0.27541	0.437356	0.494939	0.786016	-0.82373	0.710791
0.702179	0.732799	1.6924	1.82212	0.758215	0.338763	0.213696	0.575078	-0.2745	1.59003	0.166173	-0.2201	1.06848	0.620986	0.124263	-0.45676	0.515603	0.518075	0.021029	0.446407	0.1059	0.382087	-0.18318	-0.39012	0.302535	0.856494	0.640439	0.450319	-0.08742	-0.28093	0.420393	0.492378	0.75147	-0.78945	0.645133
0.644246	0.681446	1.70333	1.80348	0.732911	0.324853	0.206904	0.552403	-0.27212	1.5821	0.173084	-0.24335	1.06781	0.602139	0.139358	-0.49048	0.479412	0.523385	0.047955	0.458908	0.097937	0.366123	-0.1616	-0.35469	0.288987	0.919549	0.651994	0.400975	-0.07066	-0.27073	0.380818	0.560691	0.761263	-0.85141	0.647054
0.645647	0.649504	1.6724	1.80739	0.726835	0.292826	0.233348	0.570859	-0.3046	1.56263	0.167714	-0.28002	1.07556	0.574071	0.146893	-0.53666	0.436669	0.436832	0.083651	0.364571	0.092141	0.336816	-0.19464	-0.36504	0.361149	0.982319	0.67074	0.4063	-0.03731	-0.26236	0.365136	0.518458	0.734258	-0.80318	0.60228
0.670017	0.619433	1.6619	1.77653	0.749056	0.271507	0.247307	0.587264	-0.31133	1.54523	0.180215	-0.25714	1.0887	0.569922	0.149249	-0.58336	0.390135	0.415878	0.120875	0.316394	0.04743	0.315894	-0.21183	-0.34177	0.313064	1.01034	0.67605	0.417078	-0.02341	-0.22256	0.293813	0.53338	0.744289	-0.72536	0.560811
0.721463	0.600142	1.64451	1.77496	0.746552	0.245647	0.210581	0.526323	-0.34496	1.53634	0.168223	-0.27506	1.07672	0.536599	0.129138	-0.63281	0.325103	0.436468	0.133357	0.375872	0.051923	0.289266	-0.25296	-0.28221	0.275394	1.0197	0.724323	0.427449	-0.03268	-0.16221	0.283362	0.342461	0.661818	-0.69923	0.396248
0.708913	0.562519	1.63885	1.75544	0.721531	0.257138	0.167325	0.425334	-0.36664	1.52046	0.169175	-0.24763	1.06975	0.519661	0.129528	-0.67298	0.271517	0.434615	0.133815	0.432031	0.023405	0.270299	-0.31829	-0.2314	0.154716	0.960866	0.778383	0.373246	-0.04204	-0.15235	0.247923	0.209136	0.573326	-0.65514	0.28015
0.714066	0.539385	1.61225	1.75134	0.669874	0.238733	0.154011	0.39869	-0.41036	1.49394	0.16646	-0.20859	1.06838	0.493866	0.14042	-0.6899	0.221073	0.3824	0.096149	0.40911	0.046152	0.241859	-0.32108	-0.17207	0.100814	0.947461	0.791955	0.341253	-0.05057	-0.14326	0.273595	0.071176	0.504624	-0.77733	0.153908
0.670842	0.518588	1.5919	1.67385	0.632143	0.226519	0.146649	0.421127	-0.45723	1.47677	0.162033	-0.1593	1.05513	0.466238	0.174578	-0.71122	0.174599	0.366334	0.05989	0.285789	0.074784	0.202756	-0.33996	-0.19338	0.083678	0.965986	0.816009	0.276692	-0.04955	-0.16026	0.275021	-0.02499	0.424928	-0.80089	0.155509
0.61222	0.509478	1.59051	1.62601	0.594716	0.190107	0.140445	0.367975	-0.4492	1.46787	0.175957	-0.13328	1.02021	0.415386	0.198511	-0.72455	0.122033	0.31995	0.072383	0.289038	0.084029	0.183111	-0.35293	-0.21591	0.113654	1.0117	0.809793	0.275338	-0.08842	-0.11376	0.245809	-0.054	0.388933	-0.85174	0.145839
0.529334	0.508685	1.57262	1.5402	0.568306	0.185555	0.133268	0.36284	-0.44166	1.45603	0.188562	-0.18065	0.987137	0.375341	0.193438	-0.7548	0.13911	0.322015	0.112934	0.303856	0.051423	0.183587	-0.26498	-0.21547	0.092983	1.01839	0.858575	0.232074	-0.09979	-0.10003	0.210043	-0.03896	0.324268	-0.76992	0.234794
0.498231	0.473786	1.57013	1.52591	0.549768	0.162855	0.150394	0.31483	-0.44567	1.44012	0.204148	-0.23199	0.990736	0.376693	0.148695	-0.7537	0.132464	0.257664	0.136008	0.316827	-0.02105	0.184011	-0.13159	-0.24334	0.061832	0.999367	0.829863	0.27485	-0.09845	-0.08037	0.114219	0.003958	0.338555	-0.69072	0.246524
0.468934	0.43525	1.5537	1.52172	0.529374	0.167531	0.191036	0.386889	-0.49017	1.41861	0.229589	-0.30898	0.991796	0.369665	0.103222	-0.75259	0.139706	0.246032	0.119127	0.23439	-0.03779	0.17331	0.046291	-0.26231	0.053778	0.989027	0.833078	0.234319	-0.10839	-0.11243	0.066874	0.012213	0.280746	-0.72296	0.299214
0.446884	0.385162	1.54369	1.53889	0.543913	0.169708	0.199146	0.418755	-0.53676	1.41143	0.214353	-0.3634	1.0094	0.359285	0.11112	-0.73066	0.123976	0.257021	0.086733	0.177176	-0.06467	0.162555	0.025233	-0.26038	0.084418	0.948064	0.778711	0.257696	-0.12295	-0.09609	0.02161	0.046339	0.192675	-0.67384	0.296063

## Sheet: Hotplate Cluster 1 control
-0.436385	-0.671732	-0.700963	-0.640983	-0.60474	-0.019915	-0.612702	-0.547211	-0.736444	-0.325779	-0.605036	-0.612746	-0.716913	-0.355063	-0.364513	-0.412748	-0.627047	-0.155394	-0.10908	-0.140529	0.2214	-0.683265	-0.0607419	-0.0631591	-0.38032	-0.0580248	-0.0538425	-0.116176	-0.0527308	-0.554573	-0.681364	-0.139086	-0.543154	0.392218	0.102035
-0.407664	-0.692965	-0.713297	-0.607452	-0.595433	-0.041642	-0.602031	-0.527866	-0.722506	-0.358057	-0.596104	-0.642774	-0.739864	-0.404317	-0.353359	-0.428319	-0.618742	-0.179566	-0.0934841	-0.110513	0.235228	-0.705447	-0.0754809	-0.0653845	-0.36088	0.037674	-0.0435355	-0.152123	-0.0157064	-0.565479	-0.693445	-0.177236	-0.577368	0.346299	0.127543
-0.378565	-0.698841	-0.711518	-0.571419	-0.606828	-0.0281491	-0.594502	-0.499153	-0.711813	-0.378238	-0.572597	-0.689766	-0.743203	-0.398359	-0.312516	-0.405049	-0.632211	-0.154919	-0.0831735	-0.0599138	0.231144	-0.724433	-0.11916	-0.0845784	-0.388185	0.0639753	-0.0454424	-0.170675	-0.0425484	-0.550751	-0.738414	-0.220413	-0.585218	0.39429	0.106004
-0.384007	-0.686602	-0.708645	-0.58136	-0.601324	-0.006454	-0.568331	-0.542619	-0.650945	-0.383275	-0.558842	-0.671205	-0.759215	-0.447002	-0.308146	-0.386913	-0.632501	-0.182692	-0.0487746	-0.0951481	0.19577	-0.741359	-0.101709	-0.0493173	-0.372152	0.129259	-0.0727265	-0.108296	-0.0424753	-0.510824	-0.779076	-0.159612	-0.571626	0.362719	0.100058
-0.421776	-0.674094	-0.706238	-0.594545	-0.613312	0.0101785	-0.549139	-0.569208	-0.615768	-0.39676	-0.556455	-0.670048	-0.76109	-0.465909	-0.305638	-0.390782	-0.62107	-0.219822	-0.0377396	-0.0765142	0.155228	-0.744793	-0.0788483	-0.0807596	-0.373123	0.0102113	-0.083579	-0.0614715	-0.0759277	-0.528894	-0.773588	-0.137476	-0.549862	0.399683	0.0165451
-0.448962	-0.6617	-0.703987	-0.574094	-0.59793	0.0055274	-0.50462	-0.600614	-0.572491	-0.397424	-0.541186	-0.609254	-0.754319	-0.488096	-0.323045	-0.45035	-0.595462	-0.264925	-0.042689	-0.104713	0.16928	-0.740217	-0.078038	-0.101609	-0.320862	0.0800442	-0.0523636	0.0163619	-0.118603	-0.565118	-0.743221	-0.126778	-0.538226	0.333327	0.0315025
-0.467421	-0.658464	-0.725523	-0.557519	-0.609694	0.0150087	-0.491452	-0.579034	-0.591884	-0.435497	-0.502308	-0.596289	-0.769734	-0.514404	-0.352455	-0.475321	-0.57096	-0.322442	-0.0639036	-0.15827	0.186246	-0.74648	-0.0901037	-0.0703324	-0.294254	-0.0030473	-0.0167849	0.0664008	-0.157633	-0.598114	-0.682961	-0.136584	-0.616458	0.284193	0.0656298
-0.491671	-0.672109	-0.714199	-0.562255	-0.585976	0.0406459	-0.516012	-0.606922	-0.571281	-0.451241	-0.490772	-0.616372	-0.789821	-0.522256	-0.395668	-0.479711	-0.56429	-0.317069	-0.0778035	-0.101636	0.148037	-0.744095	-0.0882271	-0.0268616	-0.290775	0.127412	0.0066711	0.111322	-0.201624	-0.618371	-0.667636	-0.175587	-0.64474	0.294159	0.144371
-0.474519	-0.6769	-0.70671	-0.633258	-0.61298	0.0630392	-0.502684	-0.639575	-0.607137	-0.444272	-0.53331	-0.603114	-0.804772	-0.559053	-0.425437	-0.4559	-0.59946	-0.28216	-0.0891604	-0.116799	0.138683	-0.757929	-0.0734226	-0.0199652	-0.360508	0.135156	-0.0178851	0.0769486	-0.170252	-0.560059	-0.659446	-0.163185	-0.623841	0.26733	0.145764
-0.465689	-0.689384	-0.683983	-0.650703	-0.611849	0.0468151	-0.538189	-0.660192	-0.60096	-0.420377	-0.568956	-0.572768	-0.794606	-0.527462	-0.423296	-0.442647	-0.650165	-0.23506	-0.0893335	0.015588	0.121573	-0.759515	-0.1227	-0.0709777	-0.413832	0.25317	-0.0465599	0.0720613	-0.170348	-0.606836	-0.686809	-0.220136	-0.551312	0.286709	0.134029
-0.431888	-0.677148	-0.695655	-0.657627	-0.620551	0.028072	-0.509084	-0.603297	-0.627218	-0.421886	-0.581424	-0.504665	-0.781298	-0.515714	-0.400069	-0.478386	-0.699367	-0.30267	-0.0386786	-0.0177906	0.127693	-0.784124	-0.182652	-0.106387	-0.49197	0.229882	-0.0537733	0.0516071	-0.121531	-0.577816	-0.680096	-0.207997	-0.562313	0.304517	0.150982
-0.393019	-0.686505	-0.705438	-0.652647	-0.602173	0.0458659	-0.57087	-0.551805	-0.628577	-0.434531	-0.572602	-0.483576	-0.776223	-0.472445	-0.417594	-0.496258	-0.699222	-0.39335	0.0173319	-0.0076705	0.131668	-0.781659	-0.226591	-0.150649	-0.491501	0.157038	-0.0524384	0.0714733	-0.146937	-0.630162	-0.684729	-0.240791	-0.578119	0.324675	0.181735
-0.352612	-0.683757	-0.714069	-0.657567	-0.579315	0.0578524	-0.555287	-0.542168	-0.616472	-0.447044	-0.567076	-0.443925	-0.78501	-0.471766	-0.396017	-0.500529	-0.694879	-0.483501	0.100385	-0.0428175	0.133229	-0.788712	-0.177004	-0.138884	-0.492428	0.0672297	-0.0572554	0.0797558	-0.171863	-0.620113	-0.655421	-0.205341	-0.535459	0.390112	0.187726
-0.350743	-0.693162	-0.714743	-0.650734	-0.588857	0.0522914	-0.560111	-0.528121	-0.597909	-0.452691	-0.572351	-0.436767	-0.790758	-0.494852	-0.383786	-0.470106	-0.708909	-0.510148	0.0987603	-0.0001706	0.17879	-0.775118	-0.142487	-0.125645	-0.449622	0.0019472	-0.0899957	0.0546761	-0.186114	-0.651194	-0.671858	-0.20443	-0.463404	0.349089	0.197054
-0.361018	-0.690789	-0.713292	-0.635946	-0.626839	0.0190219	-0.536974	-0.565319	-0.581586	-0.450152	-0.567315	-0.433258	-0.799151	-0.494831	-0.350292	-0.453401	-0.692308	-0.522091	0.0895744	0.0089158	0.194895	-0.776839	-0.118776	-0.0973462	-0.398099	0.0443506	-0.107384	0.0370797	-0.217714	-0.657445	-0.660479	-0.157495	-0.392492	0.387905	0.187138
-0.374815	-0.698517	-0.702901	-0.615615	-0.656071	0.0038506	-0.509997	-0.628794	-0.571653	-0.438462	-0.543555	-0.465954	-0.789251	-0.492467	-0.346334	-0.45338	-0.671754	-0.566374	0.0279931	-0.0243504	0.173865	-0.778912	-0.142945	-0.0910255	-0.364211	0.116637	-0.137358	0.0036777	-0.199316	-0.64776	-0.631239	-0.192086	-0.399774	0.370391	0.187523
-0.369977	-0.700375	-0.703977	-0.615325	-0.673142	-0.0117458	-0.531261	-0.603327	-0.552521	-0.41349	-0.561146	-0.494958	-0.786976	-0.451301	-0.314426	-0.474551	-0.662438	-0.572903	-0.0384923	-0.0304078	0.141029	-0.786291	-0.15476	-0.118383	-0.333028	0.116882	-0.100517	-0.0075951	-0.203762	-0.613415	-0.611557	-0.141813	-0.412787	0.442257	0.188316
-0.397738	-0.701485	-0.714961	-0.642746	-0.622597	-0.0019273	-0.493561	-0.569082	-0.529159	-0.416835	-0.563673	-0.594203	-0.792692	-0.477865	-0.318547	-0.498868	-0.698468	-0.566673	-0.104743	-0.0819714	0.0880817	-0.783162	-0.152098	-0.147112	-0.344218	0.0750494	-0.111453	-0.0460794	-0.169418	-0.555731	-0.595646	-0.209765	-0.397334	0.433157	0.157679
-0.422443	-0.706589	-0.715936	-0.625441	-0.607862	0.0057657	-0.522502	-0.522827	-0.534503	-0.430094	-0.576872	-0.585792	-0.794033	-0.511866	-0.347456	-0.490187	-0.740865	-0.522566	-0.141044	0.0035902	0.092702	-0.780848	-0.160376	-0.127235	-0.334052	0.0008035	-0.137355	-0.0611038	-0.170532	-0.529472	-0.61214	-0.286843	-0.413433	0.479475	0.168385
-0.443188	-0.690898	-0.721973	-0.627244	-0.597425	0.0195034	-0.539963	-0.516213	-0.566562	-0.47522	-0.532033	-0.61329	-0.813964	-0.611578	-0.392908	-0.477481	-0.741503	-0.537536	-0.150662	0.0505864	0.0978719	-0.797249	-0.111098	-0.0784695	-0.327859	-0.0185751	-0.157143	-0.0519211	-0.160414	-0.52701	-0.605286	-0.391331	-0.423318	0.405473	0.156175
-0.445037	-0.673189	-0.731925	-0.636567	-0.587242	0.0178988	-0.54692	-0.508527	-0.634976	-0.505368	-0.528684	-0.544901	-0.811866	-0.659867	-0.445431	-0.455999	-0.775086	-0.549135	-0.158814	0.0491841	0.1263	-0.790798	-0.121548	-0.0355438	-0.322454	-0.0306339	-0.20049	-0.0359583	-0.13322	-0.525239	-0.617991	-0.430711	-0.459564	0.477896	0.158504
-0.473202	-0.647025	-0.745508	-0.649879	-0.574475	0.031132	-0.555626	-0.463074	-0.669417	-0.522685	-0.525854	-0.578011	-0.814941	-0.678459	-0.471541	-0.439173	-0.756959	-0.545543	-0.174668	0.0099701	0.129236	-0.806773	-0.138142	-0.0190177	-0.279023	0.0273312	-0.18314	-0.0459265	-0.140444	-0.499554	-0.568486	-0.411694	-0.409438	0.495119	0.167629
-0.501481	-0.649034	-0.753711	-0.625226	-0.554552	0.0358115	-0.494034	-0.441569	-0.651818	-0.518702	-0.526146	-0.546674	-0.798594	-0.66396	-0.482556	-0.396954	-0.77507	-0.581133	-0.207032	-0.0260775	0.101501	-0.799751	-0.177654	-0.0205962	-0.228821	0.0779876	-0.216535	-0.0159035	-0.14769	-0.462097	-0.557185	-0.401825	-0.352483	0.53603	0.161074
-0.533372	-0.657363	-0.738706	-0.627247	-0.539763	0.0333909	-0.475071	-0.450723	-0.593132	-0.510583	-0.511378	-0.559165	-0.787032	-0.631001	-0.44425	-0.311463	-0.740758	-0.584105	-0.234716	-0.0684529	0.0874422	-0.827589	-0.212027	-0.0262971	-0.173884	0.123503	-0.253495	-0.020233	-0.173871	-0.407921	-0.522723	-0.38595	-0.276296	0.548973	0.213598
-0.545596	-0.669442	-0.722055	-0.642149	-0.560155	0.0292458	-0.478892	-0.491762	-0.548298	-0.486515	-0.502806	-0.527152	-0.785829	-0.63665	-0.433152	-0.277988	-0.763226	-0.548643	-0.234565	-0.0321741	0.0951443	-0.849732	-0.173427	-0.0544037	-0.172392	0.0444442	-0.290222	-0.0248633	-0.181028	-0.370877	-0.552307	-0.366485	-0.246303	0.559236	0.199094
-0.54476	-0.677797	-0.703877	-0.680681	-0.548737	0.0581298	-0.501897	-0.544661	-0.515289	-0.493428	-0.492962	-0.494706	-0.795121	-0.634682	-0.468793	-0.26361	-0.776067	-0.498725	-0.2141	-0.0620254	0.116846	-0.858902	-0.236655	-0.0492807	-0.215138	-0.0574544	-0.285207	-0.069856	-0.157254	-0.399974	-0.531968	-0.313681	-0.172542	0.615012	0.179056
-0.509444	-0.674203	-0.700409	-0.706477	-0.598485	0.0747073	-0.577381	-0.559254	-0.505195	-0.476769	-0.478749	-0.430482	-0.806915	-0.648011	-0.502397	-0.268029	-0.819349	-0.462289	-0.162886	0.115679	0.104514	-0.846575	-0.222554	-0.0299726	-0.206744	-0.133125	-0.258508	-0.0883762	-0.127781	-0.45457	-0.530207	-0.266279	-0.194213	0.556554	0.102932
-0.47014	-0.667411	-0.708691	-0.7124	-0.582315	0.0776373	-0.545901	-0.498738	-0.496184	-0.512606	-0.458904	-0.402016	-0.810793	-0.634407	-0.516966	-0.273703	-0.856365	-0.516461	-0.121383	0.0365338	0.0989498	-0.828934	-0.329168	-0.0245928	-0.186538	-0.113834	-0.245136	-0.118057	-0.0490117	-0.456508	-0.54808	-0.271424	-0.18821	0.510719	0.0745222
-0.437668	-0.648287	-0.70869	-0.731313	-0.590762	0.0796461	-0.534718	-0.501582	-0.509044	-0.505107	-0.46531	-0.433462	-0.816441	-0.62112	-0.517332	-0.274761	-0.854959	-0.423312	-0.114315	0.0148039	0.115819	-0.818576	-0.287615	0.0033137	-0.0975005	-0.0349297	-0.256963	-0.128595	-0.0474633	-0.426838	-0.580141	-0.325879	-0.234816	0.423461	0.0809106
-0.438491	-0.648943	-0.705486	-0.711775	-0.608586	0.082753	-0.494786	-0.481669	-0.51024	-0.523687	-0.472093	-0.494859	-0.853995	-0.636795	-0.514745	-0.275579	-0.816662	-0.386683	-0.156159	-0.130135	0.149249	-0.840422	-0.289536	0.0550746	-0.0255184	-0.0180281	-0.241665	-0.15926	-0.0743403	-0.416955	-0.613965	-0.313611	-0.267282	0.368848	0.123935
-0.46793	-0.651962	-0.69893	-0.752696	-0.630207	0.0896661	-0.493057	-0.519614	-0.532333	-0.496637	-0.486844	-0.517716	-0.872306	-0.627369	-0.534227	-0.255393	-0.741125	-0.336544	-0.228624	-0.135947	0.151653	-0.854672	-0.192853	0.08892	-0.0454735	0.0679125	-0.24755	-0.17386	-0.112866	-0.413167	-0.626105	-0.277252	-0.286735	0.380292	0.134744
-0.477118	-0.663323	-0.687231	-0.759729	-0.657404	0.0973538	-0.466662	-0.528837	-0.541837	-0.51186	-0.460196	-0.500646	-0.881964	-0.623175	-0.535208	-0.219572	-0.718932	-0.368631	-0.231598	-0.191545	0.10795	-0.856379	-0.170381	0.08251	-0.0809998	-0.0174416	-0.306071	-0.147056	-0.0976273	-0.398266	-0.638044	-0.304933	-0.291304	0.350562	0.101512
-0.48555	-0.65129	-0.687315	-0.764065	-0.651751	0.110732	-0.48921	-0.518403	-0.526033	-0.513957	-0.469793	-0.490396	-0.858812	-0.593409	-0.543818	-0.20701	-0.718916	-0.418128	-0.253128	-0.110834	0.0847726	-0.821249	-0.192306	0.0921666	-0.126603	-0.0336553	-0.361081	-0.119675	-0.100331	-0.339301	-0.630429	-0.286938	-0.268536	0.490362	0.0917915
-0.503748	-0.639969	-0.689178	-0.738141	-0.686501	0.128524	-0.472566	-0.525955	-0.508347	-0.532058	-0.469882	-0.497495	-0.856986	-0.591444	-0.525128	-0.199758	-0.717446	-0.418049	-0.244612	-0.199714	0.0789892	-0.802732	-0.183521	0.118035	-0.0664343	-0.166271	-0.392703	-0.0881829	-0.107652	-0.27692	-0.601245	-0.349836	-0.3405	0.488129	0.106382
-0.539093	-0.623711	-0.71033	-0.75119	-0.693446	0.109703	-0.530954	-0.464907	-0.512355	-0.519247	-0.503465	-0.528493	-0.865353	-0.593564	-0.515571	-0.181432	-0.682386	-0.424662	-0.257842	-0.183563	0.0567611	-0.797947	-0.11707	0.170222	-0.0271893	-0.0854207	-0.345284	-0.0967732	-0.155624	-0.201838	-0.568175	-0.336513	-0.442577	0.549054	0.148116
-0.591473	-0.628057	-0.714509	-0.754791	-0.692472	0.114339	-0.475498	-0.457824	-0.541932	-0.504904	-0.500661	-0.569701	-0.867935	-0.592527	-0.480472	-0.193218	-0.701211	-0.357594	-0.214004	-0.254451	0.0219181	-0.819609	0.0211194	0.171776	-0.0205318	-0.0938953	-0.323294	-0.125196	-0.101582	-0.192012	-0.582092	-0.406143	-0.491305	0.430355	0.119945
-0.582311	-0.646465	-0.726434	-0.775336	-0.67677	0.12595	-0.468154	-0.439668	-0.571791	-0.477829	-0.50591	-0.611908	-0.86098	-0.593981	-0.455722	-0.237332	-0.735495	-0.288754	-0.152797	-0.178096	0.0061033	-0.811838	0.0908191	0.176437	-0.0566213	-0.0353496	-0.282431	-0.120997	-0.0890569	-0.187212	-0.60196	-0.383421	-0.512258	0.316283	0.12603
-0.597245	-0.670386	-0.726207	-0.770798	-0.650914	0.155495	-0.424317	-0.488532	-0.568218	-0.442234	-0.498961	-0.605419	-0.818631	-0.562764	-0.4125	-0.253959	-0.799956	-0.278131	-0.121917	-0.14324	0.0501401	-0.815796	0.0380523	0.108155	-0.070295	-0.0097033	-0.336108	-0.155837	-0.0391982	-0.228821	-0.636641	-0.391824	-0.478175	0.275778	0.104055
-0.568519	-0.676025	-0.738085	-0.781713	-0.593894	0.145943	-0.427888	-0.480903	-0.584229	-0.442209	-0.48187	-0.585955	-0.793407	-0.571862	-0.410972	-0.254021	-0.836005	-0.311559	-0.0705587	-0.196037	0.0820474	-0.803988	-0.040866	0.0883299	-0.130214	0.0595202	-0.332265	-0.145143	-0.0161003	-0.231513	-0.639286	-0.388239	-0.511383	0.271421	0.125178
-0.575822	-0.662733	-0.733735	-0.775988	-0.575619	0.147282	-0.45861	-0.519302	-0.580786	-0.430711	-0.480383	-0.573986	-0.800703	-0.57779	-0.426556	-0.202643	-0.866921	-0.395223	-0.100317	-0.153073	0.0880414	-0.791738	-0.0487675	0.0446236	-0.181793	0.0753488	-0.334324	-0.217314	-0.0169206	-0.262892	-0.660923	-0.364575	-0.494536	0.269291	0.0721142
-0.571294	-0.662211	-0.718094	-0.773324	-0.591679	0.129311	-0.479459	-0.554478	-0.582011	-0.434204	-0.470785	-0.57575	-0.827021	-0.600784	-0.441864	-0.192307	-0.851844	-0.419824	-0.134684	-0.14806	0.0817168	-0.795227	-0.052847	0.0667173	-0.262715	0.0200635	-0.294813	-0.25138	-0.0107221	-0.242367	-0.652303	-0.338186	-0.507633	0.192036	0.0796468
-0.569107	-0.680472	-0.713901	-0.781896	-0.604636	0.146543	-0.499062	-0.612114	-0.55672	-0.434983	-0.481703	-0.570582	-0.83348	-0.564454	-0.455769	-0.194424	-0.829018	-0.46149	-0.208647	-0.0299983	0.066651	-0.792146	-0.0607637	0.0248944	-0.310384	0.0425983	-0.242105	-0.27871	-0.0335835	-0.233967	-0.637981	-0.379338	-0.491432	0.199148	0.0857128
-0.519261	-0.699633	-0.705666	-0.787518	-0.614961	0.107973	-0.4582	-0.607717	-0.555828	-0.470815	-0.486389	-0.554359	-0.840874	-0.540705	-0.473062	-0.232381	-0.789535	-0.475525	-0.214629	-0.0633754	0.10266	-0.783899	-0.112867	0.0479884	-0.353337	-0.041317	-0.205875	-0.263569	-0.0351864	-0.234266	-0.612743	-0.405782	-0.535405	0.187972	0.107046
-0.45774	-0.693114	-0.710032	-0.786939	-0.558718	0.0698928	-0.458979	-0.578326	-0.538499	-0.489644	-0.486586	-0.522294	-0.83904	-0.516276	-0.492611	-0.278075	-0.800163	-0.483752	-0.192748	-0.0375991	0.0908354	-0.760154	-0.139103	0.0356058	-0.354172	-0.0014799	-0.174765	-0.290848	-0.0575959	-0.254165	-0.604075	-0.466934	-0.592625	0.316327	0.131265
-0.428233	-0.674301	-0.700092	-0.77349	-0.568337	0.0467052	-0.417577	-0.570418	-0.525022	-0.510804	-0.449401	-0.47846	-0.849382	-0.533939	-0.453567	-0.274548	-0.813799	-0.421152	-0.184409	-0.114232	0.0949513	-0.721016	-0.201953	0.0543786	-0.36944	-0.0708588	-0.196377	-0.342711	-0.0631622	-0.243257	-0.610236	-0.420021	-0.608123	0.225598	0.0983812
-0.410723	-0.66405	-0.697013	-0.779132	-0.550396	0.0212524	-0.398013	-0.571494	-0.489797	-0.512207	-0.420257	-0.388541	-0.847532	-0.566767	-0.391451	-0.270346	-0.860246	-0.361745	-0.184899	-0.115935	0.033503	-0.701869	-0.273385	-0.0218996	-0.397732	0.0271881	-0.187765	-0.362684	-0.0524147	-0.245631	-0.654716	-0.345311	-0.519993	0.298111	0.086488
-0.392086	-0.649422	-0.691274	-0.80053	-0.57301	0.0123416	-0.346418	-0.608707	-0.496266	-0.524871	-0.364531	-0.371362	-0.851875	-0.609568	-0.299789	-0.210428	-0.866221	-0.317655	-0.210712	-0.115515	0.0241522	-0.68283	-0.278177	-0.0930267	-0.452703	0.0534973	-0.212644	-0.381478	-0.0611547	-0.186619	-0.653552	-0.278739	-0.45367	0.140981	0.0681511
-0.360574	-0.621337	-0.687486	-0.820421	-0.601211	-0.0214758	-0.262667	-0.600379	-0.49281	-0.53232	-0.330021	-0.395502	-0.871542	-0.666809	-0.257474	-0.208978	-0.845867	-0.249773	-0.231222	-0.171585	-0.0143759	-0.677379	-0.212739	-0.173887	-0.382457	0.0670076	-0.246514	-0.39313	-0.0869012	-0.213946	-0.618036	-0.24043	-0.435465	0.0873812	0.0825142
-0.361354	-0.593333	-0.699606	-0.807972	-0.657946	-0.0582448	-0.197454	-0.577605	-0.495188	-0.583507	-0.221022	-0.411661	-0.871179	-0.716616	-0.178259	-0.219264	-0.784083	-0.16005	-0.272759	-0.196544	-0.0399744	-0.652436	-0.109052	-0.191995	-0.289509	0.113232	-0.26095	-0.4469	-0.153517	-0.180414	-0.529903	-0.219438	-0.476448	0.0394629	0.133633
-0.355058	-0.575573	-0.712139	-0.804017	-0.704054	-0.0839409	-0.130076	-0.509546	-0.499535	-0.660803	-0.137879	-0.469548	-0.895713	-0.757748	-0.148862	-0.275349	-0.708023	-0.0843414	-0.295226	-0.244421	-0.0950463	-0.626833	-0.0497346	-0.227301	-0.203666	0.152057	-0.244437	-0.451767	-0.165512	-0.162394	-0.495491	-0.135044	-0.397823	0.0274165	0.167002
-0.35947	-0.561321	-0.740131	-0.794988	-0.727882	-0.115482	-0.12056	-0.480064	-0.497539	-0.749464	-0.0166043	-0.466103	-0.907329	-0.815404	-0.0927796	-0.27667	-0.626927	-0.102375	-0.311443	-0.172205	-0.0868944	-0.61474	-0.0033466	-0.224818	-0.253149	0.257622	-0.205394	-0.411103	-0.192194	-0.0946551	-0.488127	-0.0722092	-0.368254	0.0567581	0.209283
-0.330981	-0.517839	-0.762722	-0.805506	-0.709507	-0.147041	-0.0951775	-0.449143	-0.483181	-0.793847	0.0423591	-0.52229	-0.929786	-0.84763	-0.082493	-0.203801	-0.589358	-0.10457	-0.31032	-0.19599	-0.0903434	-0.590451	-0.0005812	-0.238044	-0.271801	0.232144	-0.246328	-0.3917	-0.201936	-0.0517787	-0.479068	-0.0764465	-0.328682	-0.099115	0.188689
-0.295459	-0.478663	-0.785506	-0.787843	-0.730718	-0.1937	-0.0470664	-0.468637	-0.476016	-0.842122	0.123329	-0.510967	-0.95045	-0.875599	-0.0617378	-0.120721	-0.568008	-0.107768	-0.332081	-0.240604	-0.0997034	-0.536896	0.0480492	-0.237847	-0.280104	0.28182	-0.289289	-0.35439	-0.226614	-0.0053504	-0.453471	-0.0841722	-0.358155	-0.135702	0.125188
-0.24226	-0.436853	-0.793567	-0.732862	-0.715599	-0.253443	-0.0561405	-0.428945	-0.450447	-0.829915	0.172035	-0.536196	-0.967132	-0.84202	-0.0337912	-0.0532885	-0.518272	-0.105551	-0.352989	-0.213107	-0.143453	-0.469097	0.0880295	-0.237909	-0.221072	0.292805	-0.304919	-0.352121	-0.241484	0.0474992	-0.39368	-0.133936	-0.442893	-0.133385	0.143419
-0.213168	-0.396283	-0.799837	-0.704289	-0.705922	-0.290131	-0.0946027	-0.39911	-0.436575	-0.837202	0.225902	-0.486536	-0.978415	-0.830702	-0.0092303	0.009963	-0.456074	-0.116596	-0.383128	-0.110154	-0.183116	-0.41987	0.13888	-0.259805	-0.207628	0.391229	-0.306748	-0.316936	-0.222013	0.0765581	-0.355253	-0.180229	-0.439863	-0.0749859	0.134804
-0.23435	-0.350839	-0.813194	-0.652813	-0.733577	-0.320958	-0.116732	-0.358305	-0.402887	-0.824923	0.271573	-0.405824	-0.979314	-0.821745	0.0267535	0.0876352	-0.351448	-0.143368	-0.417929	0.0020372	-0.20262	-0.395482	0.184378	-0.265207	-0.226504	0.264533	-0.338031	-0.329985	-0.253179	0.0376913	-0.314561	-0.179839	-0.510199	-0.0706104	0.18611
-0.248125	-0.317513	-0.833071	-0.669214	-0.76719	-0.311311	-0.0781247	-0.406421	-0.38776	-0.87025	0.319182	-0.349299	-0.993737	-0.825274	0.0372809	0.203109	-0.297406	-0.122201	-0.493061	-0.0114468	-0.238715	-0.381642	0.228593	-0.336479	-0.259836	0.292071	-0.41434	-0.34811	-0.225653	-0.0413306	-0.284774	-0.238431	-0.441134	-0.133456	0.103571
-0.327694	-0.2752	-0.85961	-0.673615	-0.789584	-0.288203	-0.0535045	-0.419478	-0.370959	-0.907433	0.414473	-0.344707	-1.00147	-0.834775	0.0552588	0.266219	-0.212113	-0.0537213	-0.552102	-0.0610152	-0.272943	-0.35106	0.337281	-0.301945	-0.266633	0.249587	-0.443674	-0.340258	-0.221505	-0.095997	-0.256517	-0.147789	-0.446878	-0.0997242	0.133989
-0.34015	-0.234703	-0.894631	-0.680626	-0.751941	-0.258797	-0.0705279	-0.37739	-0.335714	-0.942739	0.511163	-0.338653	-1.01018	-0.830848	0.0661178	0.323251	-0.179607	0.039595	-0.588187	0.0028217	-0.295412	-0.350254	0.448268	-0.325743	-0.176593	0.401347	-0.451247	-0.29593	-0.201447	-0.135145	-0.258101	-0.114862	-0.42928	-0.145891	0.109371
-0.393727	-0.197872	-0.917712	-0.681932	-0.739407	-0.235642	-0.108636	-0.260017	-0.318221	-0.971422	0.632364	-0.33078	-1.00672	-0.849365	0.080269	0.361084	-0.126171	0.1106	-0.611701	0.0438644	-0.321002	-0.328298	0.542983	-0.310779	-0.0768838	0.419744	-0.451508	-0.229789	-0.191655	-0.145816	-0.287871	0.0545378	-0.318337	-0.189906	0.200212
-0.350421	-0.182409	-0.929425	-0.641881	-0.736916	-0.251615	-0.118572	-0.193552	-0.275676	-0.955581	0.727775	-0.347771	-0.991856	-0.81435	0.148279	0.460026	-0.121886	0.122669	-0.649689	0.0735561	-0.360266	-0.307003	0.583688	-0.350759	-0.0244897	0.439881	-0.473287	-0.250826	-0.162508	-0.132736	-0.317133	0.0055992	-0.29617	-0.268895	0.161876
-0.373348	-0.170617	-0.929506	-0.593243	-0.741456	-0.241145	-0.0856284	-0.208181	-0.238102	-0.952423	0.870929	-0.346105	-0.988286	-0.803035	0.191583	0.561575	-0.116155	0.100024	-0.703485	0.0717488	-0.400661	-0.263449	0.593282	-0.262479	-0.0142628	0.488609	-0.484832	-0.247563	-0.0567145	-0.0704398	-0.315674	-0.0288911	-0.214998	-0.297866	0.0998381
-0.314974	-0.15776	-0.939743	-0.503387	-0.735501	-0.272637	-0.062625	-0.18054	-0.206549	-0.944759	0.995041	-0.357371	-0.979613	-0.783915	0.201558	0.657559	-0.115568	0.0476165	-0.714803	0.116289	-0.424612	-0.247335	0.622345	-0.172244	-0.0320598	0.591888	-0.460791	-0.187301	-0.0209513	-0.0052385	-0.319479	-0.0859623	-0.225138	-0.388833	-0.0561215
-0.358583	-0.137085	-0.957225	-0.435094	-0.773624	-0.249737	-0.044406	-0.21279	-0.21726	-0.961361	1.13266	-0.303611	-0.994434	-0.782156	0.148106	0.702592	-0.11366	0.0165475	-0.710971	0.182244	-0.383933	-0.253186	0.630686	-0.119178	0.009089	0.64426	-0.432609	-0.0921889	0.0144684	-0.03412	-0.322733	-0.0265581	-0.211677	-0.418844	-0.145311
-0.328556	-0.11848	-0.989343	-0.379501	-0.832838	-0.264126	-0.10739	-0.225101	-0.240855	-0.966393	1.18461	-0.249658	-1.01561	-0.783349	0.111808	0.726174	-0.0516605	0.0402026	-0.698002	0.217217	-0.372635	-0.242777	0.571302	-0.18145	0.0851524	0.631722	-0.388116	0.0082284	-0.0398575	-0.1199	-0.269115	-0.0260295	-0.22791	-0.476947	-0.154317
-0.344287	-0.0917108	-1.00095	-0.330949	-0.886354	-0.264881	-0.150416	-0.322601	-0.255483	-0.960481	1.25673	-0.151049	-1.04689	-0.778034	0.0760065	0.717608	0.0269489	0.0863168	-0.707989	0.309779	-0.347827	-0.239088	0.460663	-0.225563	0.189543	0.576432	-0.364685	-0.0001769	-0.0475246	-0.200908	-0.166509	0.0042102	-0.258383	-0.543316	-0.0906644
-0.306679	-0.0716442	-1.00628	-0.283835	-0.918763	-0.273405	-0.183622	-0.343145	-0.250412	-0.975506	1.29812	-0.0938012	-1.06197	-0.789847	0.0343658	0.733303	0.129335	0.154174	-0.75144	0.344635	-0.372539	-0.223844	0.356081	-0.252628	0.242073	0.575564	-0.365291	0.0310534	-0.0494288	-0.220852	-0.132135	0.067579	-0.237123	-0.615931	-0.049283
-0.295865	-0.0496402	-0.994219	-0.252661	-0.939019	-0.285872	-0.18198	-0.333305	-0.213962	-0.975277	1.3723	-0.0043408	-1.04962	-0.756831	0.0024666	0.780719	0.160572	0.220209	-0.808069	0.409524	-0.354475	-0.210614	0.286521	-0.2111	0.132451	0.56528	-0.386165	0.0668948	0.0152393	-0.255661	-0.161538	0.104729	-0.166894	-0.598331	-0.0510337
-0.32134	-0.0369806	-0.990462	-0.252479	-0.942445	-0.299868	-0.210155	-0.281321	-0.16817	-0.995545	1.42909	0.0886435	-1.03451	-0.729151	-0.0382443	0.816557	0.185681	0.226019	-0.839624	0.481425	-0.382859	-0.172107	0.25486	-0.131101	0.0716117	0.476175	-0.39999	0.122499	0.0871028	-0.285122	-0.208799	0.100168	-0.107241	-0.510525	-0.13881
-0.35229	-0.0167337	-0.994873	-0.223648	-0.956207	-0.333702	-0.231761	-0.268138	-0.143458	-0.996917	1.49174	0.18009	-1.0396	-0.697608	-0.0617559	0.869201	0.225063	0.147475	-0.841331	0.618278	-0.392734	-0.119804	0.145404	-0.0330015	0.0438163	0.470138	-0.394278	0.236117	0.157345	-0.318483	-0.130288	-0.0401311	-0.164462	-0.488323	-0.164356
-0.425911	0.028803	-0.988419	-0.166221	-0.95797	-0.362162	-0.237159	-0.334747	-0.118856	-1.0129	1.54288	0.261912	-1.04723	-0.707986	-0.0647568	0.893993	0.290109	0.0909385	-0.801161	0.71321	-0.404411	-0.0684617	0.1035	0.0054687	0.0821837	0.438777	-0.37756	0.286935	0.17064	-0.301066	-0.0530373	-0.0279483	-0.158603	-0.50213	-0.202351
-0.541099	0.099615	-1.0176	-0.0783645	-0.949731	-0.37688	-0.291453	-0.378412	-0.132704	-1.01979	1.50624	0.363382	-1.06197	-0.709235	-0.0697686	0.981848	0.386364	0.091638	-0.783446	0.848295	-0.421382	-0.0037866	0.0880383	-0.0682421	0.139037	0.477081	-0.395049	0.414939	0.108896	-0.291271	0.0427033	0.0261506	-0.130243	-0.552461	-0.0823597
-0.638043	0.151066	-1.02586	-0.0551735	-0.970104	-0.3925	-0.331269	-0.373414	-0.104106	-1.02962	1.50142	0.446275	-1.0572	-0.739912	-0.085151	1.01366	0.47048	0.158	-0.834505	0.809087	-0.4055	0.0895938	0.145511	-0.117505	0.245388	0.391548	-0.418728	0.419435	0.0376923	-0.287776	0.0999082	0.180825	0.0343134	-0.641155	0.0594106
-0.7497	0.184831	-1.05436	-0.0526364	-0.996939	-0.40193	-0.396718	-0.324665	-0.103939	-1.02382	1.45708	0.426188	-1.06523	-0.771355	-0.144406	1.02234	0.597811	0.160053	-0.921656	0.846395	-0.42136	0.215482	0.265846	-0.176684	0.421334	0.23378	-0.42119	0.432613	-0.0423584	-0.283557	0.169788	0.24393	0.0447931	-0.794042	0.248521
-0.785567	0.190194	-1.06991	-0.0932223	-1.03766	-0.420557	-0.381922	-0.329382	-0.0473155	-1.01402	1.48347	0.367976	-1.0579	-0.793256	-0.153117	1.00671	0.665665	0.194135	-0.993153	0.761864	-0.442532	0.343791	0.363304	-0.206793	0.470899	0.105358	-0.409601	0.372006	-0.0746565	-0.278866	0.231039	0.237925	0.0875318	-0.969176	0.410527
-0.825155	0.197846	-1.10797	-0.119455	-0.995671	-0.426841	-0.41529	-0.311943	-0.0369588	-1.01547	1.45194	0.26413	-1.06033	-0.811879	-0.180971	0.988399	0.766334	0.173985	-1.02329	0.786802	-0.525202	0.444476	0.41366	-0.281862	0.498283	-0.0347388	-0.427099	0.320218	-0.153577	-0.277599	0.326329	0.25525	0.149857	-1.06697	0.545341
-0.837746	0.191787	-1.1412	-0.135447	-0.960343	-0.447389	-0.424971	-0.271531	-0.0448283	-1.01959	1.44414	0.23391	-1.03955	-0.817708	-0.206489	0.956812	0.850672	0.251052	-1.03872	0.702957	-0.578161	0.524458	0.419145	-0.360972	0.522561	-0.241736	-0.487647	0.243086	-0.236772	-0.294147	0.386949	0.548864	0.347636	-1.21094	0.816817
-0.870141	0.162456	-1.1502	-0.13503	-0.973682	-0.461426	-0.443124	-0.256893	-0.0922406	-1.0135	1.41271	0.24318	-1.03172	-0.853563	-0.291419	0.893293	0.962657	0.315067	-1.06139	0.640539	-0.629824	0.60066	0.411558	-0.454944	0.63393	-0.613751	-0.517984	0.230232	-0.385291	-0.286428	0.450864	1.00401	0.494807	-1.23586	1.04188
-0.865646	0.157753	-1.16294	-0.102717	-1.00569	-0.479503	-0.448031	-0.324145	-0.106625	-1.00132	1.3923	0.235031	-1.03045	-0.842641	-0.321118	0.866577	1.0933	0.456095	-1.07244	0.637859	-0.617132	0.670092	0.522057	-0.549117	0.669774	-0.857254	-0.49714	0.260268	-0.464225	-0.311648	0.543342	1.38165	0.67566	-1.35995	1.25155
-0.874074	0.157684	-1.16134	-0.107704	-1.00782	-0.48734	-0.416616	-0.360819	-0.100606	-1.00515	1.35109	0.177523	-1.03007	-0.820021	-0.369811	0.837426	1.19033	0.54718	-1.10317	0.596811	-0.687262	0.729084	0.534635	-0.607785	0.727733	-1.05319	-0.474343	0.306833	-0.515363	-0.352987	0.659223	1.52897	0.668358	-1.43233	1.31679
-0.872329	0.19506	-1.17821	-0.0902678	-0.977302	-0.496435	-0.372459	-0.347462	-0.0838008	-0.995067	1.31104	0.114924	-1.01252	-0.755461	-0.359576	0.853046	1.32137	0.660344	-1.10996	0.508612	-0.711863	0.762761	0.624276	-0.635109	0.782607	-1.22531	-0.522394	0.316865	-0.519346	-0.454008	0.770407	1.59935	0.69181	-1.44208	1.36526
-0.891566	0.210686	-1.17722	-0.0968928	-0.956146	-0.493357	-0.320706	-0.323987	-0.0661169	-1.00036	1.26837	0.105037	-1.00337	-0.720131	-0.389558	0.849916	1.42625	0.726436	-1.1381	0.457977	-0.757956	0.797129	0.647732	-0.660974	0.843796	-1.33684	-0.58268	0.362414	-0.583871	-0.45885	0.82016	1.87686	0.636505	-1.43967	1.4512
-0.895428	0.21413	-1.1772	-0.066939	-0.949794	-0.492665	-0.312981	-0.331459	-0.0406876	-0.987398	1.22489	0.0656003	-1.00249	-0.678046	-0.368209	0.85306	1.48434	0.802532	-1.15582	0.43582	-0.709729	0.825605	0.727742	-0.733548	0.785728	-1.40919	-0.62001	0.36232	-0.697952	-0.454061	0.875398	2.16854	0.777235	-1.39959	1.52347
-0.912522	0.217152	-1.15803	-0.0553427	-0.915358	-0.476089	-0.337722	-0.371814	0.0015468	-1.01947	1.13162	0.0050434	-1.01483	-0.648521	-0.353268	0.818339	1.48573	0.872315	-1.17808	0.504461	-0.724524	0.864026	0.805927	-0.753167	0.666073	-1.39976	-0.597126	0.360284	-0.705476	-0.360617	0.980454	2.16256	0.873438	-1.4184	1.45866
-0.932725	0.226474	-1.12818	-0.0542587	-0.867965	-0.480744	-0.36096	-0.378922	0.0741812	-1.03228	1.02861	-0.0845823	-1.01548	-0.567258	-0.307985	0.770219	1.54528	0.975927	-1.16942	0.53188	-0.715868	0.862551	0.896317	-0.741697	0.577653	-1.33841	-0.554486	0.348338	-0.711101	-0.353227	1.13052	1.99337	0.886393	-1.30604	1.31055
-0.914348	0.243494	-1.08921	-0.0717087	-0.827798	-0.455747	-0.399834	-0.464049	0.129276	-1.03375	0.925956	-0.121384	-1.02906	-0.476216	-0.285119	0.794391	1.65695	1.09403	-1.14015	0.567296	-0.706675	0.88039	1.00583	-0.668501	0.597343	-1.22866	-0.565814	0.315563	-0.651945	-0.310136	1.3313	1.87662	0.920219	-1.21575	1.14307
-0.873281	0.242632	-1.04146	-0.0894993	-0.814005	-0.450771	-0.38925	-0.535935	0.159661	-1.01583	0.884758	-0.165683	-1.04642	-0.369906	-0.268463	0.816177	1.76564	1.1619	-1.14567	0.496504	-0.662727	0.885765	1.12038	-0.668532	0.593813	-1.06866	-0.550346	0.267875	-0.670789	-0.260191	1.58722	1.8618	0.908524	-1.22436	1.08106
-0.889284	0.250124	-0.9937	-0.117491	-0.74755	-0.40777	-0.34096	-0.62444	0.191906	-1.00817	0.8471	-0.241278	-1.05568	-0.282478	-0.218668	0.85014	1.77493	1.13672	-1.1838	0.345677	-0.633298	0.90679	1.31541	-0.663629	0.508533	-1.03474	-0.540866	0.146643	-0.592631	-0.186401	1.81874	1.77187	1.022	-1.16415	0.998318
-0.970406	0.276516	-0.957246	-0.1223	-0.701302	-0.4079	-0.292914	-0.667389	0.286816	-1.01627	0.817576	-0.256823	-1.0483	-0.180187	-0.163406	0.816783	1.77023	1.09682	-1.20696	0.275533	-0.603333	0.912624	1.44834	-0.627492	0.390342	-1.00417	-0.455151	0.0961215	-0.493403	-0.157259	2.03087	1.43468	1.02732	-1.08249	0.881965
-0.980743	0.328441	-0.92274	-0.12383	-0.61302	-0.409771	-0.239203	-0.736585	0.419981	-1.013	0.779126	-0.291905	-1.03953	-0.0895734	-0.0807005	0.799412	1.78491	1.16117	-1.1775	0.25768	-0.564405	0.933148	1.4844	-0.54621	0.336801	-0.8002	-0.396278	0.0772793	-0.401432	-0.17293	2.14979	1.19338	1.01319	-0.987648	0.722986
-1.0001	0.370376	-0.882691	-0.107812	-0.591428	-0.445488	-0.213877	-0.839398	0.529462	-1.00013	0.71405	-0.235415	-1.02572	0.0258427	-0.0556266	0.796931	1.81049	1.23365	-1.14974	0.292073	-0.519106	0.9605	1.38523	-0.495178	0.349682	-0.675526	-0.358617	0.114049	-0.317943	-0.162779	2.2889	0.851162	0.955611	-0.91963	0.526106
-0.938936	0.401918	-0.837479	-0.116797	-0.516954	-0.490005	-0.113588	-0.911628	0.617272	-0.991593	0.639202	-0.238862	-1.03501	0.0927166	0.0064054	0.815293	1.7733	1.30956	-1.118	0.198334	-0.529052	1.01333	1.27265	-0.448005	0.309179	-0.534222	-0.326782	0.17591	-0.225685	-0.111034	2.36661	0.538494	0.939727	-0.877754	0.237894
-0.933434	0.429965	-0.784204	-0.0925442	-0.475857	-0.527706	-0.0022563	-0.96672	0.671027	-0.979353	0.557498	-0.148486	-1.03231	0.203054	0.0113227	0.825014	1.70043	1.21743	-1.06611	0.0825474	-0.482299	1.08811	1.16792	-0.367926	0.224646	-0.661908	-0.260942	0.239601	-0.0896386	-0.0670335	2.41924	0.178325	1.01106	-0.756394	-0.0719895
-0.837916	0.447728	-0.730013	-0.0794492	-0.40389	-0.572117	0.0907727	-0.977695	0.759715	-0.980329	0.503271	-0.0507854	-1.03153	0.290013	0.090784	0.878613	1.6148	1.18737	-0.989212	0.0191228	-0.510312	1.19944	1.11784	-0.249854	0.143263	-0.596253	-0.204803	0.334348	0.0240476	0.0042826	2.44199	-0.134022	1.07705	-0.662475	-0.314107
-0.745659	0.452098	-0.674601	-0.0327309	-0.33769	-0.588217	0.143582	-0.991474	0.836079	-0.995091	0.467373	0.113898	-1.01584	0.391265	0.143397	0.892975	1.53278	1.11519	-0.938083	0.0154736	-0.483681	1.29344	1.0497	-0.177701	0.0650687	-0.545198	-0.101455	0.408732	0.0612661	0.0806646	2.44751	-0.270058	1.06305	-0.549063	-0.412478
-0.690651	0.475302	-0.623918	-0.0323318	-0.275442	-0.583474	0.177977	-0.984137	0.963606	-0.99444	0.442031	0.158911	-0.968711	0.460406	0.24912	0.901438	1.38579	1.10659	-0.925035	0.0501308	-0.520266	1.34165	0.968781	-0.149612	0.0034647	-0.475023	-0.0323932	0.481699	0.0841288	0.179109	2.43595	-0.422249	1.13925	-0.408247	-0.411907
-0.642072	0.492507	-0.574158	0.0108736	-0.23902	-0.601234	0.228341	-0.976337	1.07386	-1.00382	0.411518	0.212133	-0.921637	0.533677	0.274814	0.88722	1.15054	1.05196	-0.917252	0.0644903	-0.44108	1.36999	0.832881	-0.100221	-0.0434834	-0.436565	0.0398945	0.536506	0.0814229	0.29556	2.33625	-0.442691	1.1269	-0.324111	-0.486139
-0.592289	0.522983	-0.524515	0.0318016	-0.222107	-0.609044	0.346605	-0.980842	1.1548	-0.97611	0.394334	0.255265	-0.850062	0.603115	0.309377	0.949303	0.946212	0.992411	-0.875078	-0.0532168	-0.403677	1.38344	0.775571	-0.0203168	-0.0976758	-0.423022	0.0381724	0.608872	0.129506	0.4164	2.242	-0.553224	1.19988	-0.221011	-0.545885
-0.534576	0.537411	-0.465964	0.0616068	-0.206832	-0.642211	0.404803	-0.963018	1.22155	-0.952473	0.367688	0.314357	-0.795251	0.656724	0.336499	1.04437	0.815382	0.894521	-0.848761	-0.145734	-0.310457	1.40465	0.69172	0.0241072	-0.160337	-0.219723	0.0376909	0.6228	0.128263	0.493598	2.13252	-0.524678	1.15341	-0.184925	-0.628824
-0.461188	0.544263	-0.449255	0.0598308	-0.190821	-0.637054	0.458694	-0.903474	1.21979	-0.94137	0.330263	0.386688	-0.753945	0.638979	0.341117	1.09612	0.774603	0.780319	-0.801068	-0.235728	-0.271359	1.41744	0.654866	-0.0153555	-0.187408	-0.101632	0.0440426	0.610561	0.105112	0.540364	2.03932	-0.492725	1.12264	-0.157156	-0.589426
-0.422544	0.556003	-0.44078	0.0677372	-0.143691	-0.641343	0.457962	-0.836001	1.2295	-0.960859	0.319515	0.416211	-0.710806	0.606549	0.33686	1.14081	0.765553	0.645235	-0.815161	-0.269978	-0.1736	1.42169	0.623651	-0.092606	-0.200054	0.052965	0.0331604	0.571905	0.120004	0.615861	2.02954	-0.554359	1.01172	-0.122477	-0.590559
-0.407726	0.553274	-0.444341	0.0602366	-0.131986	-0.667397	0.477882	-0.744593	1.18662	-0.96832	0.27634	0.419336	-0.673315	0.527578	0.335869	1.14248	0.76097	0.605117	-0.816288	-0.314308	-0.0861195	1.40758	0.628889	-0.14968	-0.278953	0.0780296	0.0137463	0.534548	0.167589	0.717112	2.01286	-0.639492	0.958363	-0.0981863	-0.549633
-0.403912	0.539124	-0.404781	0.0766326	-0.107537	-0.665347	0.47635	-0.715125	1.1922	-0.939409	0.31644	0.454467	-0.619416	0.508634	0.363779	1.14127	0.747246	0.574263	-0.819002	-0.329383	-0.0133358	1.38283	0.707966	-0.204019	-0.460668	0.0422377	0.0219004	0.521394	0.228082	0.821657	2.04611	-0.75446	0.974287	-0.0788667	-0.548382
-0.37376	0.515314	-0.368899	0.104847	-0.152013	-0.686341	0.447509	-0.672266	1.18411	-0.908035	0.313334	0.459854	-0.575941	0.447554	0.404575	1.11633	0.695461	0.58421	-0.806442	-0.253282	0.0811929	1.37711	0.740137	-0.247087	-0.614761	-0.0357972	0.0264073	0.503189	0.2162	0.866662	1.98764	-0.724198	1.06032	-0.0842622	-0.49571
-0.334674	0.511854	-0.344881	0.128054	-0.154585	-0.656142	0.43585	-0.693397	1.17986	-0.899456	0.367631	0.487383	-0.53514	0.430559	0.425612	1.09811	0.659498	0.554034	-0.815802	-0.238294	0.202898	1.37046	0.844467	-0.270646	-0.699069	-0.0690217	0.0288262	0.531091	0.177929	0.922953	1.91755	-0.718317	1.07906	-0.104781	-0.436929
-0.325625	0.508809	-0.340036	0.112425	-0.195743	-0.68816	0.408699	-0.720982	1.14733	-0.892911	0.357529	0.475373	-0.502624	0.36857	0.46367	1.09787	0.629041	0.499318	-0.827493	-0.191306	0.343159	1.37525	0.865948	-0.299257	-0.720669	-0.0439129	0.0065508	0.531054	0.140843	0.966794	1.81629	-0.68291	1.07957	-0.114058	-0.384854
-0.30095	0.523122	-0.330581	0.0674983	-0.221737	-0.680318	0.433859	-0.718235	1.11998	-0.883456	0.372849	0.453945	-0.464879	0.36237	0.507094	1.07695	0.609137	0.471837	-0.820708	-0.271535	0.41205	1.34982	0.890509	-0.32296	-0.733318	-0.0361608	0.0052721	0.545968	0.134683	1.04596	1.72379	-0.659341	1.01106	-0.168362	-0.383809
-0.289306	0.511928	-0.316236	0.0341654	-0.213846	-0.678758	0.422938	-0.712526	1.08934	-0.87453	0.378749	0.459549	-0.437021	0.351446	0.548478	1.08405	0.555866	0.396342	-0.786791	-0.271788	0.426674	1.36731	0.88615	-0.334317	-0.746606	-0.0558117	-0.009892	0.533352	0.141653	1.14789	1.64675	-0.580183	0.94423	-0.150462	-0.412601
-0.304381	0.523109	-0.30297	0.0421463	-0.217313	-0.654515	0.47513	-0.706608	1.04427	-0.870406	0.39105	0.432684	-0.422055	0.342707	0.58367	1.04389	0.536641	0.373246	-0.753325	-0.330469	0.437906	1.38152	0.868362	-0.334048	-0.729253	-0.0416976	0.0045735	0.53103	0.117288	1.28519	1.60373	-0.548078	0.794234	-0.18283	-0.367736
-0.332539	0.512475	-0.296455	0.0557493	-0.176982	-0.646095	0.535212	-0.718214	0.987248	-0.862451	0.402635	0.497802	-0.428502	0.326945	0.604313	1.00024	0.505145	0.267344	-0.707143	-0.382919	0.47769	1.42742	0.857853	-0.295986	-0.702267	0.0051909	0.0665982	0.590517	0.0962038	1.44263	1.56598	-0.506729	0.745456	-0.179659	-0.288647
-0.361056	0.506079	-0.28867	0.0812219	-0.211355	-0.665977	0.564429	-0.727989	0.937745	-0.866237	0.396215	0.634358	-0.435011	0.2851	0.628361	0.966019	0.475379	0.219905	-0.653519	-0.40952	0.49499	1.46909	0.843326	-0.332776	-0.681623	0.00602	0.118342	0.593487	0.0603926	1.56017	1.50506	-0.481934	0.672314	-0.284598	-0.191714
-0.387095	0.483862	-0.284958	0.0849573	-0.192299	-0.691555	0.541934	-0.705363	0.903422	-0.848566	0.3627	0.779425	-0.422087	0.2703	0.635671	0.989535	0.402308	0.166044	-0.600898	-0.444207	0.489116	1.5305	0.852285	-0.39263	-0.656017	-0.033119	0.123581	0.6272	0.0636987	1.64855	1.40965	-0.447867	0.631196	-0.301547	-0.181176
-0.430039	0.470817	-0.277567	0.0807637	-0.21251	-0.730106	0.518307	-0.680909	0.891499	-0.832165	0.323802	0.929307	-0.389745	0.239855	0.654519	1.01945	0.352964	0.128238	-0.540781	-0.454381	0.453533	1.58859	0.886405	-0.430169	-0.676151	-0.0336201	0.101261	0.60101	0.111489	1.6809	1.28579	-0.41635	0.505892	-0.308656	-0.17716
-0.449952	0.454111	-0.267422	0.0782351	-0.174543	-0.7782	0.566749	-0.658685	0.885988	-0.806552	0.322814	1.0382	-0.360266	0.192734	0.672585	1.01286	0.268015	0.0895353	-0.472365	-0.536463	0.432331	1.62764	0.944881	-0.414944	-0.712089	0.0330583	0.110052	0.647826	0.193805	1.74068	1.17949	-0.41356	0.436472	-0.168407	-0.18134
-0.440991	0.435286	-0.251737	0.0711912	-0.157331	-0.814671	0.619826	-0.624319	0.875087	-0.801816	0.357233	1.16834	-0.341715	0.142819	0.694097	0.966982	0.222961	0.0715801	-0.397354	-0.589665	0.364445	1.65202	0.963256	-0.338005	-0.728172	0.11878	0.145177	0.607614	0.279022	1.77266	1.11146	-0.444744	0.41156	-0.165877	-0.151555
-0.439513	0.412857	-0.24146	0.0485018	-0.137778	-0.855031	0.586547	-0.657616	0.84511	-0.776499	0.371491	1.21265	-0.327341	0.105013	0.686929	0.920142	0.148489	0.0791006	-0.38105	-0.560784	0.323369	1.67781	0.952629	-0.297197	-0.713059	0.121093	0.177147	0.595821	0.334704	1.89367	1.05433	-0.427925	0.396294	-0.183769	-0.160937
-0.440774	0.387539	-0.232254	0.0277217	-0.106997	-0.85939	0.537541	-0.676641	0.835038	-0.786887	0.330622	1.30301	-0.326286	0.101885	0.693647	0.865614	0.13027	0.0142052	-0.343624	-0.560256	0.272541	1.69983	0.899168	-0.264032	-0.645398	0.0715092	0.282246	0.561045	0.369776	2.0101	1.02483	-0.451546	0.380553	-0.28092	-0.205027
-0.430399	0.388416	-0.216977	0.0147838	-0.0813298	-0.888964	0.541414	-0.726495	0.808979	-0.771645	0.291561	1.38112	-0.298991	0.0923875	0.729374	0.88722	0.111447	-0.0672833	-0.313097	-0.598249	0.261652	1.70495	0.866403	-0.233918	-0.679386	-0.0139477	0.326058	0.562732	0.391779	2.12071	0.993556	-0.434222	0.395718	-0.301426	-0.217161
-0.439013	0.392818	-0.204162	0.0322637	-0.045097	-0.870418	0.571395	-0.747654	0.837078	-0.772031	0.255328	1.48615	-0.277342	0.0651869	0.768332	0.896276	0.0869859	-0.0788786	-0.244059	-0.662764	0.219524	1.68994	0.847197	-0.203114	-0.643036	-0.0570123	0.380725	0.54775	0.384936	2.11555	0.963566	-0.412941	0.353418	-0.257778	-0.20142
-0.418277	0.414033	-0.192786	0.0688127	-0.0640702	-0.852135	0.60502	-0.780412	0.837069	-0.731217	0.24655	1.52016	-0.244717	0.0430194	0.801015	0.915053	0.0745478	-0.0140456	-0.264864	-0.638873	0.205786	1.67674	0.867631	-0.0952708	-0.679922	-0.0374194	0.381807	0.555185	0.392466	2.10169	0.924837	-0.345288	0.27242	-0.266029	-0.15162
-0.4443	0.443047	-0.188306	0.0892152	-0.0591451	-0.807382	0.581682	-0.756961	0.890579	-0.726071	0.218355	1.5815	-0.224393	0.0161552	0.818644	0.869915	-0.0095841	0.0666129	-0.291677	-0.584125	0.171145	1.65672	0.901425	-0.0322193	-0.685164	-0.12525	0.4104	0.604576	0.420723	2.08147	0.847114	-0.320726	0.237756	-0.250125	-0.207767
-0.456981	0.458723	-0.182775	0.0843725	-0.0495118	-0.812506	0.633403	-0.716717	0.906933	-0.708918	0.219348	1.61529	-0.196736	-0.0011927	0.846335	0.878874	-0.0600465	0.0963566	-0.325927	-0.626289	0.168092	1.65839	0.882171	0.0374556	-0.746852	-0.109805	0.37217	0.652604	0.491476	2.0685	0.826182	-0.335987	0.266199	-0.250276	-0.220418
-0.501293	0.451433	-0.171692	0.0862479	-0.0108506	-0.816047	0.685345	-0.679456	0.930098	-0.6895	0.251929	1.71716	-0.16607	-0.0204863	0.868221	0.895067	-0.135124	0.0432037	-0.321308	-0.661718	0.174255	1.65739	0.840142	0.0249161	-0.772652	-0.140643	0.325752	0.67067	0.564127	2.0184	0.793686	-0.346004	0.33597	-0.178483	-0.277112
-0.470502	0.437736	-0.160214	0.0672144	0.0068456	-0.805688	0.746287	-0.672681	0.934914	-0.675317	0.270051	1.6917	-0.148947	-0.0305063	0.881531	0.923146	-0.128125	0.0236209	-0.324174	-0.74251	0.200016	1.6785	0.778595	0.0482557	-0.726685	-0.0928714	0.286718	0.646906	0.608253	1.9723	0.792108	-0.35091	0.301902	-0.220701	-0.215846
-0.455051	0.44377	-0.153221	0.0691654	0.0310331	-0.790636	0.778126	-0.708753	0.922381	-0.65619	0.264168	1.70443	-0.135594	-0.0258862	0.910116	0.908697	-0.136096	-0.025188	-0.319221	-0.759411	0.216887	1.69068	0.814578	0.0410205	-0.739928	-0.0849133	0.306034	0.592362	0.609208	1.92949	0.733003	-0.305497	0.27635	-0.248623	-0.201746
-0.447318	0.456606	-0.158668	0.0377744	0.0583903	-0.788799	0.769152	-0.719159	0.927081	-0.653773	0.245452	1.66339	-0.0940626	-0.0075653	0.921994	0.87492	-0.112781	-0.0443031	-0.319675	-0.780691	0.184796	1.67842	0.832885	0.0434203	-0.748982	-0.0282017	0.3128	0.573352	0.643228	1.93402	0.683273	-0.275093	0.285063	-0.25004	-0.159661
-0.47106	0.464327	-0.168883	0.0661137	0.0751463	-0.813535	0.790098	-0.785405	0.891905	-0.646189	0.223699	1.69372	-0.0564312	-0.0076605	0.92648	0.832826	-0.116773	-0.102588	-0.318881	-0.77226	0.198306	1.66689	0.832787	0.055173	-0.798743	-0.0563049	0.326314	0.545945	0.701432	1.90065	0.61814	-0.230833	0.244293	-0.218454	-0.230599
-0.491986	0.453018	-0.164899	0.0721402	0.0848069	-0.814593	0.728116	-0.747745	0.893867	-0.658081	0.22671	1.70374	-0.0247274	-0.0058921	0.921572	0.76069	-0.0845475	-0.157864	-0.333966	-0.633154	0.214264	1.65339	0.796136	0.0814784	-0.780567	-0.0640002	0.329373	0.534286	0.753447	1.89579	0.587778	-0.214204	0.253715	-0.179713	-0.222044
-0.46846	0.449627	-0.157035	0.0617473	0.0865639	-0.805712	0.698595	-0.70742	0.913408	-0.644848	0.238995	1.73398	-0.018617	-0.030565	0.94411	0.740492	-0.0894338	-0.186254	-0.336294	-0.580999	0.236936	1.66897	0.764909	0.104703	-0.765975	-0.100386	0.336674	0.468538	0.751395	1.8507	0.580664	-0.243535	0.220613	-0.25993	-0.21812
-0.457744	0.445534	-0.158979	0.0519148	0.127864	-0.78219	0.660694	-0.621974	0.948699	-0.610551	0.244039	1.77275	-0.0120556	-0.037597	0.984489	0.768061	-0.0899649	-0.208078	-0.355133	-0.49925	0.239531	1.6595	0.768419	0.0673394	-0.733585	0.0210674	0.337218	0.497466	0.764671	1.82859	0.618064	-0.251143	0.272836	-0.234683	-0.169199
-0.440846	0.461068	-0.163738	0.045413	0.138024	-0.784011	0.66908	-0.612403	0.949785	-0.575051	0.228136	1.83106	0.0136827	-0.0518523	1.0041	0.774196	-0.0899458	-0.16872	-0.35237	-0.529229	0.210057	1.66772	0.732284	0.0547091	-0.710297	0.0002676	0.364811	0.481024	0.778812	1.81268	0.680746	-0.276064	0.264702	-0.219354	-0.173037
-0.478712	0.470959	-0.184511	0.0776357	0.140021	-0.773807	0.70026	-0.649679	0.894677	-0.565841	0.190918	1.8532	0.0423491	-0.0520432	1.00319	0.763345	-0.0685066	-0.16965	-0.375892	-0.583882	0.229165	1.68007	0.714645	0.0796018	-0.675015	-0.0086703	0.37329	0.497276	0.829334	1.73002	0.755211	-0.192154	0.254576	-0.140946	-0.241974
-0.511556	0.468554	-0.189409	0.0569929	0.15378	-0.777607	0.740011	-0.644174	0.875834	-0.547086	0.211477	1.85881	0.0997157	-0.0363182	0.988424	0.723435	-0.0610396	-0.14103	-0.373639	-0.660633	0.211787	1.72706	0.689582	0.103333	-0.6466	-0.0415578	0.375594	0.460823	0.849666	1.66932	0.793296	-0.0626682	0.236127	-0.0872637	-0.229668
-0.50768	0.453022	-0.198584	0.0798638	0.153537	-0.773777	0.747914	-0.660509	0.831553	-0.532038	0.236163	1.81527	0.124822	-0.039999	0.968305	0.783554	-0.0964685	-0.176781	-0.380991	-0.630616	0.217543	1.75898	0.58816	0.0518022	-0.648584	-0.0536472	0.322827	0.474109	0.840663	1.61923	0.761995	0.0914937	0.21231	-0.153858	-0.253382
-0.515583	0.442656	-0.17822	0.0481311	0.17118	-0.778916	0.787087	-0.626935	0.816757	-0.484699	0.241557	1.76516	0.165097	-0.0350137	0.967256	0.765749	-0.127502	-0.141817	-0.386495	-0.605332	0.192129	1.79304	0.531926	-0.0295951	-0.639198	-0.0814661	0.312043	0.451927	0.806056	1.64469	0.74349	0.13522	0.162613	-0.114939	-0.151648
-0.500063	0.448251	-0.17199	0.0287427	0.164604	-0.762168	0.745782	-0.610649	0.817295	-0.450741	0.211297	1.73303	0.181984	-0.0471894	0.971157	0.738818	-0.134571	-0.09831	-0.366359	-0.52955	0.191019	1.82595	0.546381	-0.0425689	-0.596314	-0.229536	0.291059	0.425723	0.727016	1.63745	0.721287	0.176045	0.122799	-0.12519	-0.135977
-0.510928	0.462236	-0.154276	0.0040076	0.223129	-0.745856	0.738134	-0.557405	0.820229	-0.389041	0.162693	1.70168	0.223502	-0.0139869	1.00439	0.681496	-0.119317	-0.0810236	-0.344077	-0.583111	0.175363	1.84734	0.688434	0.0221876	-0.518089	-0.275272	0.294504	0.382647	0.700252	1.62469	0.737299	0.134603	0.0229216	-0.0653735	-0.0725389
-0.485658	0.47531	-0.158619	0.0275058	0.277031	-0.743897	0.628298	-0.506485	0.832062	-0.341034	0.133825	1.67708	0.258776	0.0052117	1.00892	0.716602	-0.137875	-0.0738616	-0.315269	-0.43396	0.1825	1.85079	0.727707	-7.74e-05	-0.517628	-0.318476	0.262518	0.341679	0.682452	1.59314	0.693177	0.0904638	-0.0300287	-0.0346272	-0.0719562
-0.490592	0.470981	-0.159317	0.0432879	0.31512	-0.728039	0.645371	-0.508513	0.825654	-0.306206	0.105696	1.65939	0.302183	0.0494788	1.0227	0.767471	-0.167136	-0.127177	-0.325739	-0.445766	0.18023	1.82112	0.705884	-0.0024394	-0.57383	-0.242148	0.231627	0.278414	0.711243	1.58591	0.673952	-0.0233639	-0.0584936	-0.039623	-0.0793131
-0.473839	0.47284	-0.165055	0.0743129	0.372183	-0.701828	0.659509	-0.544886	0.8629	-0.299378	0.0863303	1.66411	0.326806	0.0562077	1.02351	0.774618	-0.194821	-0.145777	-0.36211	-0.361052	0.141062	1.77527	0.644329	-0.0041789	-0.670368	-0.145767	0.24901	0.269156	0.719874	1.5673	0.684058	-0.15999	-0.0605732	0.0372105	-0.155738
-0.470392	0.467443	-0.154987	0.0850657	0.388165	-0.680986	0.71814	-0.582364	0.89768	-0.314484	0.051391	1.60083	0.334826	0.0474685	1.01542	0.723996	-0.178822	-0.163837	-0.379016	-0.449985	0.0906335	1.76301	0.628864	0.0539887	-0.643254	-0.074088	0.270253	0.25907	0.714458	1.5688	0.74088	-0.171082	-0.106611	0.0783062	-0.156238
-0.44609	0.47256	-0.142827	0.111497	0.449147	-0.663961	0.745657	-0.606084	0.925058	-0.31392	0.073658	1.55061	0.339287	0.024199	1.02956	0.707367	-0.191174	-0.118563	-0.399823	-0.482983	0.0477662	1.74479	0.597344	0.0511636	-0.641673	-0.0596717	0.269667	0.341959	0.697375	1.5577	0.751053	-0.106274	-0.12533	0.145155	-0.110149
-0.446792	0.472238	-0.129984	0.0826611	0.43413	-0.673657	0.762747	-0.559195	0.946474	-0.292401	0.0809164	1.47309	0.364915	0.0276384	1.0471	0.702575	-0.201961	-0.123735	-0.395928	-0.571083	0.029171	1.7531	0.562894	0.0266783	-0.581703	-0.16047	0.25302	0.321253	0.721269	1.54242	0.751134	-0.0150787	-0.0968266	0.086202	-0.0553913
-0.434534	0.473245	-0.131742	0.0543202	0.471473	-0.699384	0.760586	-0.536639	0.981082	-0.252656	0.100938	1.42455	0.382781	0.0364707	1.07191	0.696366	-0.244646	-0.108534	-0.402421	-0.537923	-0.0085625	1.73973	0.461549	-0.0005955	-0.590694	-0.257467	0.17986	0.275992	0.734368	1.47482	0.697653	-0.0035714	-0.0889737	0.0077527	-0.0857332
-0.40651	0.476689	-0.121265	0.0443767	0.45639	-0.731822	0.749616	-0.503564	1.02494	-0.215439	0.0954154	1.38282	0.407581	0.0513679	1.08388	0.649714	-0.275517	-0.109654	-0.36664	-0.536203	-0.0481122	1.74259	0.348583	-0.0010132	-0.574357	-0.259172	0.187937	0.22968	0.755869	1.48733	0.656427	-0.0099988	-0.142647	-0.0094734	-0.114144
-0.416815	0.478429	-0.119825	0.0568243	0.461505	-0.752014	0.712448	-0.526085	1.03814	-0.176478	0.0902507	1.36795	0.418331	0.0353962	1.08247	0.599653	-0.317948	-0.0480737	-0.305868	-0.481953	-0.0361161	1.72207	0.264512	0.0333061	-0.55601	-0.2361	0.169244	0.213662	0.742526	1.48305	0.604626	-0.100885	-0.172088	-0.000275	-0.167367
-0.425128	0.476616	-0.117624	0.0542744	0.458962	-0.734583	0.696959	-0.517747	1.0157	-0.168892	0.120485	1.35166	0.42974	0.022726	1.0527	0.560612	-0.352462	0.0119303	-0.259811	-0.480524	-0.0522527	1.69674	0.194255	0.0807597	-0.549381	-0.273587	0.181541	0.201201	0.733378	1.53451	0.567159	-0.210965	-0.154848	0.0139525	-0.237588
-0.48116	0.488269	-0.115793	0.065098	0.476714	-0.761135	0.675359	-0.502614	1.00672	-0.146576	0.109308	1.41567	0.453276	0.0400183	1.00796	0.511402	-0.369704	0.0392627	-0.241177	-0.44571	-0.0638633	1.69031	0.217406	0.119271	-0.555387	-0.357694	0.131037	0.162488	0.734981	1.51489	0.520586	-0.290197	-0.116501	0.0365564	-0.325985
-0.442314	0.496758	-0.114499	0.0442978	0.51691	-0.730838	0.6506	-0.43436	0.987251	-0.161507	0.138575	1.41254	0.478435	0.0715214	0.968016	0.465186	-0.362799	-0.0342398	-0.271222	-0.39788	-0.071504	1.68251	0.263899	0.125321	-0.570261	-0.400048	0.0960025	0.147615	0.749139	1.5285	0.493464	-0.247343	-0.0851869	0.126258	-0.351158
-0.428945	0.495435	-0.113946	0.0727515	0.541288	-0.720938	0.669934	-0.406498	0.986141	-0.137971	0.115347	1.39664	0.505161	0.0918964	0.974172	0.428296	-0.354134	-0.0792209	-0.297207	-0.370733	-0.0816962	1.66374	0.341942	0.0908726	-0.561109	-0.389937	0.128198	0.205814	0.738982	1.48023	0.445893	-0.149696	-0.121973	0.192701	-0.304524
-0.400697	0.45944	-0.10571	0.077824	0.569366	-0.685014	0.639981	-0.432268	0.94998	-0.120271	0.13226	1.31107	0.535913	0.091064	0.999597	0.395239	-0.379064	-0.145023	-0.305429	-0.276407	-0.0680333	1.62478	0.300019	0.0216777	-0.522759	-0.301525	0.109093	0.223492	0.726449	1.49147	0.42607	-0.0910597	-0.060809	0.215727	-0.289266
-0.395498	0.435943	-0.104878	0.0743624	0.608886	-0.682774	0.662695	-0.377128	0.963764	-0.0893682	0.113025	1.24884	0.555972	0.0645184	1.0055	0.363236	-0.382843	-0.103661	-0.340027	-0.199626	-0.103847	1.61033	0.30346	-0.0211273	-0.481895	-0.281199	0.0977356	0.22724	0.700815	1.50651	0.42101	-0.129185	-0.01365	0.199856	-0.185785
-0.354879	0.423824	-0.105792	0.0712659	0.618723	-0.679706	0.68507	-0.334173	0.950222	-0.0815225	0.0939598	1.28383	0.587175	0.0365254	1.00398	0.318111	-0.373224	-0.105096	-0.325993	-0.210816	-0.106897	1.59954	0.280599	0.0334198	-0.395972	-0.216595	0.0622698	0.233079	0.74553	1.53675	0.430059	-0.181273	0.0804805	0.22537	-0.216498
-0.313606	0.424149	-0.120682	0.0358597	0.611045	-0.676595	0.744994	-0.336157	0.974494	-0.0665121	0.0706576	1.28409	0.610883	0.0237496	0.998657	0.284526	-0.289296	-0.0804693	-0.339037	-0.263652	-0.14101	1.58785	0.310796	0.105108	-0.264311	-0.277409	0.0749878	0.234895	0.755342	1.54146	0.451603	-0.175135	0.030199	0.30944	-0.148768
-0.295471	0.419342	-0.130045	0.0064701	0.600525	-0.677727	0.770918	-0.410291	0.960421	-0.0477738	0.0496106	1.25638	0.637067	0.0307589	0.986214	0.270892	-0.272366	-0.0423467	-0.33778	-0.357672	-0.162906	1.57434	0.25588	0.0803169	-0.202732	-0.268568	0.0634878	0.215951	0.768309	1.49537	0.394939	-0.0919566	0.0613308	0.379499	-0.20142
-0.312462	0.427651	-0.137147	-0.018039	0.620336	-0.66554	0.72585	-0.44805	0.959237	-0.0215596	0.0429917	1.16875	0.679871	0.0518442	0.956127	0.240814	-0.239516	-0.0320797	-0.359168	-0.338039	-0.178204	1.59176	0.27323	0.0293307	-0.160483	-0.305382	0.0195796	0.154979	0.714322	1.52214	0.380097	-0.0610103	0.0267299	0.361621	-0.143897
-0.352878	0.426345	-0.134469	-0.0013768	0.603631	-0.652142	0.669641	-0.369829	0.937061	-0.0225725	0.0172591	1.12654	0.703476	0.0238377	0.942501	0.227009	-0.266255	0.0072501	-0.377988	-0.245195	-0.175029	1.5991	0.344105	-0.0146074	-0.152519	-0.290163	-0.0073981	0.095762	0.68654	1.50822	0.348647	0.0050967	0.0439663	0.310219	-0.139061
-0.416985	0.429686	-0.143003	0.02	0.601159	-0.626131	0.649942	-0.353238	0.957319	-0.0128559	-0.0046474	1.14115	0.717712	0.0147237	0.940291	0.201637	-0.254953	-0.0073464	-0.352586	-0.237325	-0.162647	1.59198	0.384658	-0.0045143	-0.129169	-0.246507	-0.0227369	0.0750271	0.618432	1.48121	0.373292	0.0232402	0.0132017	0.178044	-0.100628
-0.437205	0.433811	-0.133072	0.0351118	0.596094	-0.60325	0.649714	-0.352959	1.01067	0.0131879	-0.0238296	1.18542	0.717598	0.0118324	0.955058	0.233355	-0.237884	0.0021972	-0.354117	-0.209299	-0.155129	1.57256	0.417894	0.0031413	-0.128223	-0.183952	-0.0555978	0.0824344	0.626369	1.48902	0.373807	0.142669	0.0386844	0.121222	-0.0432899
-0.417258	0.433793	-0.149743	0.0331495	0.592681	-0.553095	0.656725	-0.318709	0.994753	0.0303073	-0.0591132	1.142	0.715527	0.020948	0.913534	0.201447	-0.205557	0.0019718	-0.384029	-0.294943	-0.149672	1.53466	0.433267	-0.0098437	-0.10768	-0.142245	-0.0687365	0.0678084	0.618702	1.43489	0.37881	0.0433017	0.0951842	-0.0220614	0.0082707
-0.377384	0.447646	-0.123491	0.0385071	0.59027	-0.530241	0.612598	-0.322418	0.998899	0.0533018	-0.091675	1.2048	0.740537	0.0305859	0.902472	0.230744	-0.173777	0.046354	-0.435907	-0.258864	-0.178507	1.5073	0.476556	0.0093572	-0.0636245	-0.225698	-0.106197	0.106865	0.641978	1.46071	0.366868	0.0456727	0.113569	0.050711	0.0143124
-0.41252	0.429989	-0.120217	0.0020874	0.590187	-0.509236	0.638617	-0.275115	0.960854	0.0457635	-0.122778	1.15801	0.75279	0.0389903	0.89661	0.233232	-0.170416	0.0761619	-0.467414	-0.332207	-0.223433	1.49444	0.487675	0.0253365	-0.0438248	-0.276921	-0.0793623	0.0816989	0.631585	1.42622	0.346836	-0.0161085	0.146505	0.0842559	-0.0313331
-0.462442	0.455524	-0.116132	-0.0216849	0.621079	-0.520899	0.683835	-0.327697	0.999482	0.0663042	-0.134228	1.11794	0.772634	0.0431631	0.895281	0.260219	-0.176032	0.0395144	-0.460261	-0.349993	-0.267176	1.52201	0.503609	0.0513702	-0.0570976	-0.379106	-0.0424118	0.0735947	0.631364	1.42604	0.340344	0.0129467	0.145589	0.214005	-0.109162
-0.523311	0.454424	-0.126553	-0.0271248	0.602129	-0.535849	0.706875	-0.319286	0.993952	0.0764595	-0.174319	1.0431	0.777198	0.0222424	0.880352	0.240162	-0.147402	-0.0194802	-0.422058	-0.312314	-0.277805	1.55485	0.495232	0.0846108	-0.0526636	-0.314261	-0.0049462	0.017974	0.657852	1.40649	0.353992	-0.0871328	0.102096	0.152203	-0.134951
-0.525567	0.44286	-0.139821	-0.0029333	0.579764	-0.576862	0.697389	-0.380968	1.0167	0.0977089	-0.172284	0.98223	0.805758	0.0063582	0.900588	0.213542	-0.139152	-0.101454	-0.401807	-0.221695	-0.241374	1.58325	0.53487	0.0928424	-0.11095	-0.369979	-0.047913	0.0333643	0.640879	1.32022	0.36325	-0.126625	0.0675719	0.111429	-0.197128
-0.506533	0.410517	-0.14901	-0.0108087	0.574341	-0.596862	0.682406	-0.314544	1.01091	0.0838342	-0.174129	0.983581	0.821407	-0.0289087	0.883356	0.117435	-0.105607	-0.120683	-0.372986	-0.215914	-0.260343	1.587	0.572345	0.110651	-0.158521	-0.326314	-0.0561674	0.0342415	0.626249	1.31727	0.382564	-0.17125	0.0357145	0.0311531	-0.221665
-0.513732	0.389827	-0.157168	-0.026703	0.571572	-0.600194	0.700979	-0.339748	0.996418	0.0923826	-0.156573	0.936113	0.867478	-0.0219352	0.89726	0.0679307	-0.107396	-0.113906	-0.395855	-0.314574	-0.251648	1.60598	0.62418	0.0703458	-0.253747	-0.332777	-0.106305	0.0776414	0.595375	1.29301	0.415368	-0.187913	0.0555967	0.0320981	-0.236326
-0.506565	0.411012	-0.16204	-0.0653692	0.551419	-0.605792	0.698891	-0.328181	0.985111	0.0986691	-0.19019	0.958451	0.89866	-0.0054325	0.866525	0.0094292	-0.100511	-0.120647	-0.385596	-0.404954	-0.253178	1.59952	0.567272	0.0790783	-0.238779	-0.395161	-0.110604	0.101386	0.595071	1.27355	0.456929	-0.23418	0.0884885	0.0011231	-0.16821
-0.51085	0.418634	-0.152158	-0.0797045	0.556066	-0.589745	0.708421	-0.374692	0.984627	0.120941	-0.224785	0.892806	0.935031	0.0321489	0.879228	0.0799983	-0.11338	-0.137081	-0.395955	-0.462289	-0.222061	1.60661	0.452461	0.0639634	-0.285242	-0.484404	-0.177735	0.103451	0.587153	1.21757	0.452432	-0.249399	0.0847806	0.0392242	-0.126614
-0.507883	0.396109	-0.16108	-0.0506237	0.568758	-0.60755	0.690624	-0.331058	0.956779	0.113987	-0.237903	0.880502	0.952314	0.0317575	0.854748	0.0693691	-0.123299	-0.160382	-0.360556	-0.434372	-0.210515	1.58318	0.442963	0.161095	-0.315086	-0.581391	-0.217226	0.0828819	0.553222	1.16424	0.428594	-0.216961	0.0377349	0.0844665	-0.0863086
-0.466129	0.388692	-0.150859	-0.0215597	0.600259	-0.573284	0.687333	-0.264821	0.929199	0.111144	-0.246846	0.828803	0.967402	0.0266752	0.833901	0.0899137	-0.116277	-0.135308	-0.348249	-0.416275	-0.191565	1.57169	0.422121	0.151007	-0.337546	-0.517125	-0.262763	0.107806	0.561889	1.14513	0.391676	-0.207801	-0.0298931	0.121178	-0.108155
-0.405369	0.411282	-0.157122	0.0087824	0.587455	-0.589409	0.693315	-0.219999	0.934005	0.107409	-0.222913	0.85433	1.00092	0.0051624	0.829621	0.0032711	-0.0629953	-0.0821773	-0.343778	-0.403537	-0.169229	1.54515	0.393691	0.179838	-0.285457	-0.509048	-0.2944	0.164767	0.550222	1.11826	0.381271	-0.169064	-0.0942264	0.187256	-0.106108
-0.359305	0.42672	-0.155934	0.0285232	0.584829	-0.554869	0.680446	-0.213599	0.945121	0.101194	-0.215071	0.817648	1.0253	-0.002912	0.840237	-0.0221095	-0.08938	-0.115691	-0.358075	-0.386125	-0.148847	1.5117	0.259986	0.129857	-0.297025	-0.547716	-0.335281	0.172897	0.572429	1.08541	0.306551	-0.107642	-0.11072	0.189101	-0.191482
-0.337067	0.426037	-0.178226	0.0470526	0.593164	-0.565299	0.64545	-0.234859	0.934397	0.101984	-0.231878	0.831529	1.03013	-0.0169222	0.828157	-0.0456772	-0.105842	-0.180081	-0.360302	-0.369684	-0.158112	1.45986	0.190135	0.162451	-0.342859	-0.511015	-0.373785	0.150206	0.559199	1.10545	0.27115	-0.129688	-0.0908398	0.234656	-0.210448
-0.336761	0.417836	-0.18487	0.0808326	0.58249	-0.547795	0.586718	-0.238342	0.893842	0.11055	-0.262507	0.808123	1.00874	-0.0104982	0.816941	-0.0203672	-0.148297	-0.27667	-0.354808	-0.198453	-0.105465	1.43348	0.206237	0.21332	-0.341597	-0.511929	-0.396162	0.118758	0.554745	1.10454	0.237933	-0.164166	-0.052059	0.15058	-0.16364
-0.315336	0.419319	-0.191751	0.0312896	0.589048	-0.558825	0.611996	-0.189936	0.878736	0.121239	-0.283745	0.789584	0.985798	-0.0248161	0.784665	0.027336	-0.164582	-0.305146	-0.325823	-0.165354	-0.103216	1.42618	0.210162	0.184048	-0.349082	-0.423476	-0.432609	0.0765723	0.547191	1.14426	0.247182	-0.209669	0.0072433	0.153596	-0.0978226
-0.309139	0.414545	-0.179392	-0.001412	0.586542	-0.528609	0.645615	-0.18481	0.889844	0.105026	-0.267328	0.764445	0.983537	-0.0365647	0.763936	0.011974	-0.205315	-0.274417	-0.321447	-0.143934	-0.0930414	1.41288	0.222356	0.142931	-0.387631	-0.511509	-0.422486	0.0090053	0.477385	1.15656	0.281344	-0.262432	0.0297073	0.171087	-0.085125
-0.315436	0.402253	-0.174212	-0.01364	0.613214	-0.517741	0.642002	-0.240882	0.839966	0.0949628	-0.278578	0.776347	1.00515	-0.0437082	0.744677	0.0058802	-0.260445	-0.292364	-0.295561	-0.155519	-0.117648	1.3618	0.237593	0.0919197	-0.469995	-0.467681	-0.48473	-0.0077758	0.455946	1.17909	0.276571	-0.274965	0.0196492	0.266375	-0.104087
-0.302416	0.395483	-0.185668	0.029592	0.632577	-0.515471	0.610282	-0.263301	0.818135	0.0737284	-0.296982	0.803563	1.02206	-0.023576	0.712509	-0.0683319	-0.236182	-0.259574	-0.302637	-0.101676	-0.176318	1.30676	0.245989	0.141069	-0.423654	-0.467801	-0.48955	0.0520619	0.377669	1.17252	0.280479	-0.260369	-0.0688953	0.24812	-0.0480352
-0.323008	0.377376	-0.209643	0.0713909	0.634209	-0.539652	0.614661	-0.149343	0.768671	0.0563414	-0.314891	0.841554	1.04259	-0.011698	0.680745	-0.119898	-0.201163	-0.273267	-0.284266	-0.0583261	-0.188096	1.28032	0.232595	0.172335	-0.403591	-0.354102	-0.531302	0.15353	0.37882	1.15331	0.251164	-0.204069	-0.136916	0.330064	-0.0228085
-0.330999	0.354555	-0.214216	0.0764271	0.627919	-0.544307	0.633345	-0.107546	0.785848	0.0701098	-0.326268	0.834106	1.05926	0.0196346	0.66027	-0.139888	-0.189731	-0.180785	-0.307047	-0.0394004	-0.204548	1.26217	0.225727	0.171812	-0.421035	-0.350208	-0.550666	0.187571	0.363633	1.15533	0.239576	-0.18389	-0.179818	0.266361	-0.0207482
-0.344494	0.341386	-0.21558	0.0674545	0.578717	-0.529447	0.639193	-0.0632459	0.772108	0.0725395	-0.333893	0.771112	1.0699	0.0172475	0.643328	-0.180974	-0.196828	-0.134068	-0.32062	-0.035433	-0.128704	1.25154	0.214835	0.113596	-0.436262	-0.371903	-0.549764	0.231012	0.402552	1.13749	0.235833	-0.208539	-0.178831	0.290606	-0.044091
-0.296553	0.336263	-0.200401	0.0487357	0.585245	-0.518535	0.602481	-0.152098	0.774984	0.106625	-0.36598	0.665573	1.06734	0.0276094	0.669849	-0.155512	-0.213468	-0.0916681	-0.401474	-0.0698207	-0.0850486	1.2258	0.187103	0.0513771	-0.426841	-0.369298	-0.552239	0.241495	0.423783	1.12482	0.233255	-0.277826	-0.190742	0.214481	-0.0660387
-0.272464	0.34493	-0.203903	0.0341315	0.596207	-0.492753	0.56523	-0.115581	0.776545	0.102723	-0.394485	0.581763	1.08604	0.0093307	0.681139	-0.17139	-0.17777	-0.131133	-0.414428	-0.107924	-0.0744535	1.21772	0.129481	0.0216402	-0.401113	-0.415836	-0.520344	0.298015	0.387661	1.15755	0.268939	-0.302771	-0.171643	0.191728	-0.0946723
-0.232645	0.361564	-0.182976	0.0558248	0.639133	-0.483569	0.567931	-0.117091	0.811957	0.114998	-0.406547	0.519949	1.10083	0.0150018	0.706224	-0.160139	-0.149331	-0.12589	-0.438351	-0.129011	-0.124544	1.19376	0.0544988	0.0080485	-0.426504	-0.379784	-0.492359	0.277124	0.349853	1.21696	0.256951	-0.299183	-0.17214	0.272514	-0.108914
-0.233864	0.399053	-0.193985	0.0721596	0.603365	-0.434814	0.549036	-0.13713	0.839691	0.103471	-0.398886	0.487275	1.12271	0.032318	0.708779	-0.193578	-0.116791	-0.10603	-0.436302	-0.0498452	-0.142767	1.15838	0.087773	-0.0017179	-0.411451	-0.470544	-0.50123	0.29432	0.259872	1.2678	0.222409	-0.212464	-0.157306	0.216322	-0.0679007
-0.229448	0.415637	-0.205382	0.0924807	0.593971	-0.432402	0.538012	-0.135881	0.84392	0.0934284	-0.369923	0.482909	1.1111	0.0460807	0.720851	-0.218298	-0.152797	-0.0882541	-0.438879	-0.0972995	-0.158399	1.1132	0.124834	-0.0255915	-0.474266	-0.354291	-0.549969	0.313509	0.280867	1.27654	0.141823	-0.218902	-0.151737	0.31341	-0.0357651
-0.267339	0.40792	-0.219537	0.108891	0.59541	-0.353473	0.49761	-0.12884	0.831893	0.0740467	-0.380545	0.513835	1.11671	0.0485411	0.695167	-0.232224	-0.210964	-0.102044	-0.413686	-0.118436	-0.148209	1.08612	0.262252	-0.0011907	-0.505821	-0.363393	-0.627409	0.33608	0.268436	1.27479	0.084878	-0.15598	-0.100942	0.226937	-0.050147
-0.29292	0.395289	-0.214732	0.131228	0.658877	-0.319648	0.483934	-0.0592785	0.834141	0.0797738	-0.380074	0.530239	1.13238	0.0505454	0.679496	-0.219992	-0.261327	-0.152486	-0.356544	-0.172137	-0.15719	1.05912	0.321523	0.0281292	-0.517904	-0.265788	-0.659015	0.305806	0.287157	1.27236	0.0934171	-0.205874	-0.0756892	0.324127	-0.0296593
-0.269269	0.375938	-0.212918	0.168323	0.666934	-0.268102	0.437954	-0.0309875	0.826579	0.0848547	-0.427287	0.569618	1.1624	0.0731849	0.641152	-0.230913	-0.291672	-0.167634	-0.352115	-0.0854324	-0.159107	1.06472	0.33576	0.0793961	-0.447918	-0.309145	-0.672097	0.266206	0.238225	1.30448	0.0879801	-0.170035	-0.0421559	0.262793	-0.0702868
-0.273452	0.370905	-0.221542	0.172355	0.649492	-0.281921	0.431328	-0.0372372	0.817337	0.094687	-0.445448	0.546757	1.19129	0.0621778	0.643249	-0.233891	-0.309677	-0.21628	-0.357891	-0.0325663	-0.149104	1.08873	0.288056	0.104444	-0.386563	-0.300227	-0.693277	0.229513	0.247549	1.28515	0.128141	-0.237953	-0.0449065	0.258394	-0.133719
-0.299862	0.352069	-0.217772	0.193711	0.602321	-0.277207	0.409129	-0.0922581	0.825345	0.100858	-0.437401	0.618834	1.22543	0.0654706	0.638809	-0.247837	-0.32391	-0.219271	-0.359201	0.0003074	-0.178419	1.13857	0.320135	0.12513	-0.332987	-0.336422	-0.735973	0.254291	0.200935	1.2506	0.137935	-0.222783	-0.0750088	0.194185	-0.203922
-0.362841	0.345237	-0.217153	0.167501	0.636533	-0.266028	0.467338	-0.0491843	0.837132	0.0731416	-0.41499	0.596009	1.23046	0.0248634	0.649942	-0.259881	-0.321221	-0.226283	-0.334706	-0.0733075	-0.244524	1.1745	0.443417	0.143988	-0.328226	-0.202581	-0.76548	0.23165	0.208036	1.25874	0.153227	-0.243368	-0.0557039	0.211567	-0.250665
-0.359853	0.349114	-0.197097	0.140825	0.677493	-0.274697	0.49034	-0.112315	0.849408	0.105868	-0.416692	0.565408	1.24158	0.0495698	0.670365	-0.255903	-0.318218	-0.249694	-0.327127	-0.153678	-0.3057	1.19398	0.596957	0.107882	-0.304721	-0.176448	-0.79082	0.256325	0.137674	1.2358	0.152284	-0.184318	-0.0196571	0.166148	-0.21963
-0.372024	0.35241	-0.209666	0.168384	0.710268	-0.307806	0.525245	-0.121028	0.843058	0.105297	-0.454052	0.483628	1.22523	0.0422262	0.693988	-0.237384	-0.305434	-0.291535	-0.334118	-0.215761	-0.33737	1.21216	0.665958	0.146505	-0.27947	-0.152565	-0.796604	0.262916	0.126589	1.28202	0.184765	-0.168566	0.0598047	0.191036	-0.221417
-0.375771	0.344987	-0.195675	0.195684	0.719567	-0.324885	0.498782	-0.165315	0.868967	0.151883	-0.451178	0.424778	1.23593	0.0616491	0.707695	-0.214142	-0.26903	-0.346604	-0.340366	-0.216834	-0.332439	1.23812	0.67117	0.170584	-0.207824	-0.270288	-0.79906	0.241959	0.0522661	1.22149	0.278292	-0.213252	0.0288443	0.154548	-0.207886
-0.355398	0.348032	-0.21028	0.24756	0.724008	-0.329293	0.47472	-0.0854545	0.917793	0.154885	-0.445505	0.40732	1.24584	0.0574727	0.740932	-0.232161	-0.257105	-0.36773	-0.303764	-0.210493	-0.30048	1.24096	0.650822	0.206691	-0.181333	-0.358577	-0.759708	0.229574	0.0382635	1.2519	0.322957	-0.331798	0.0112237	0.176309	-0.220514
-0.292447	0.351417	-0.210737	0.217483	0.74767	-0.318213	0.437204	-0.0117872	0.936902	0.17079	-0.458079	0.434694	1.25588	0.0440508	0.727533	-0.281785	-0.24798	-0.357751	-0.263452	-0.16275	-0.282885	1.2689	0.622913	0.152087	-0.136697	-0.43241	-0.774535	0.171066	0.0436575	1.18562	0.309184	-0.364033	0.00062	0.125959	-0.168202
-0.237889	0.352803	-0.205008	0.237853	0.720948	-0.33352	0.430812	0.0160009	0.935805	0.167946	-0.458068	0.513718	1.26279	0.0253678	0.714459	-0.29054	-0.278311	-0.317902	-0.229263	-0.169019	-0.255794	1.2981	0.540744	0.0996227	-0.128888	-0.438203	-0.818011	0.200071	0.0369468	1.1732	0.242139	-0.344852	0.0180007	0.133608	-0.171628
-0.226095	0.346818	-0.204648	0.220856	0.708733	-0.325562	0.449429	-0.0136095	0.896414	0.16072	-0.422718	0.573039	1.25847	0.0053946	0.658484	-0.301007	-0.278547	-0.202793	-0.182751	-0.183034	-0.26084	1.33899	0.461843	0.116461	-0.0794772	-0.379773	-0.882857	0.182467	0.0249396	1.15843	0.229284	-0.353418	-0.0070482	0.101649	-0.185872
-0.246321	0.340143	-0.201886	0.194214	0.70176	-0.322162	0.462326	-0.0045397	0.908755	0.170711	-0.384563	0.548785	1.28117	0.0028171	0.633679	-0.355307	-0.283909	-0.143449	-0.137619	-0.188625	-0.316685	1.32397	0.360753	0.1927	-0.0438651	-0.307022	-0.849948	0.191848	0.0057041	1.18652	0.217079	-0.361475	-0.015731	0.104365	-0.259162
-0.27529	0.325043	-0.223536	0.167641	0.697369	-0.318798	0.47175	0.023049	0.904976	0.170207	-0.385584	0.565646	1.28769	0.0183299	0.621643	-0.451951	-0.281785	-0.118362	-0.0681234	-0.126069	-0.348045	1.30262	0.256129	0.243941	0.0280436	-0.31526	-0.813869	0.217866	0.0312249	1.17129	0.240799	-0.451052	-0.0344775	0.0910265	-0.239088
-0.30045	0.304765	-0.234765	0.153863	0.680966	-0.305038	0.448241	0.105827	0.918632	0.166881	-0.411095	0.576525	1.31347	0.0445776	0.604564	-0.508031	-0.265736	-0.187075	-0.0175475	-0.0269517	-0.334668	1.28003	0.150086	0.251181	0.0279425	-0.296611	-0.822699	0.229404	0.063835	1.19622	0.217042	-0.4453	-0.048513	0.0594	-0.229047
-0.2846	0.274657	-0.224004	0.181583	0.654982	-0.283531	0.473311	0.149072	0.886128	0.161864	-0.394183	0.62298	1.33413	0.0631162	0.572287	-0.497735	-0.252244	-0.241046	-0.0065909	0.02876	-0.256747	1.29073	0.0785214	0.282404	0.0383352	-0.386866	-0.882448	0.197502	0.131721	1.20895	0.215824	-0.447354	-0.0966859	0.0317618	-0.265564
-0.273644	0.281894	-0.21691	0.176603	0.673224	-0.239556	0.485212	0.165501	0.891539	0.163014	-0.414552	0.577918	1.35365	0.0777524	0.552904	-0.494934	-0.228285	-0.231446	-0.0239575	-0.0181211	-0.249456	1.27184	0.149416	0.294786	-0.0165101	-0.371195	-0.935309	0.132395	0.18004	1.21258	0.193443	-0.354753	-0.121087	0.0017118	-0.298213
-0.272259	0.261795	-0.197021	0.17994	0.6499	-0.233678	0.533477	0.20562	0.889733	0.179653	-0.396699	0.592903	1.36657	0.0782113	0.541317	-0.508801	-0.206931	-0.219788	-0.083292	-0.136256	-0.24564	1.24614	0.174601	0.331777	-0.0291617	-0.38295	-0.943598	0.0976166	0.244246	1.12186	0.210684	-0.327598	-0.140535	0.13083	-0.311385
-0.279451	0.254608	-0.217053	0.172817	0.658747	-0.206496	0.551096	0.199823	0.866211	0.189303	-0.37895	0.609055	1.364	0.0648826	0.529277	-0.534972	-0.205618	-0.202996	-0.104054	-0.136016	-0.271005	1.22859	0.243958	0.313041	-0.0504753	-0.389482	-0.969913	0.0956859	0.271688	1.12549	0.230026	-0.357769	-0.10363	0.216848	-0.274992
-0.28715	0.239303	-0.241581	0.158237	0.659085	-0.168736	0.597881	0.188336	0.812299	0.171741	-0.342639	0.642507	1.36329	0.0538794	0.498648	-0.579791	-0.215906	-0.232016	-0.15638	-0.169823	-0.244096	1.21077	0.218826	0.35339	-0.0276372	-0.408118	-0.942906	0.0995532	0.319309	1.13191	0.2607	-0.413371	-0.100889	0.183459	-0.3127
-0.273129	0.250826	-0.26014	0.15186	0.665882	-0.133616	0.589977	0.175422	0.794498	0.166158	-0.355705	0.659644	1.35575	0.0725606	0.504329	-0.589953	-0.214789	-0.271006	-0.182527	-0.140984	-0.267468	1.22741	0.252707	0.344358	0.0320791	-0.433347	-0.94434	0.0323199	0.335418	1.15432	0.266213	-0.454899	-0.0834722	0.116911	-0.352496
-0.283165	0.254123	-0.266408	0.150866	0.651941	-0.140996	0.563864	0.213684	0.825099	0.146479	-0.367507	0.668559	1.35272	0.0943606	0.495168	-0.630045	-0.240789	-0.33165	-0.206228	-0.165334	-0.259358	1.24447	0.261326	0.34487	0.0873048	-0.310769	-0.888011	-0.0388779	0.351425	1.13231	0.270095	-0.379763	-0.130988	0.0075766	-0.38055
-0.303005	0.261977	-0.256151	0.148092	0.61318	-0.166376	0.53365	0.228883	0.841841	0.183271	-0.392133	0.718415	1.36466	0.105477	0.47408	-0.635981	-0.207793	-0.347587	-0.237638	-0.160561	-0.242183	1.27627	0.306142	0.348401	0.163868	-0.367137	-0.847055	-0.125464	0.335407	1.12935	0.28614	-0.305592	-0.128846	0.0618081	-0.3545
-0.308359	0.262341	-0.254876	0.17218	0.65358	-0.16767	0.541882	0.235059	0.869306	0.180914	-0.396249	0.799779	1.37527	0.0969643	0.459287	-0.677765	-0.197695	-0.364818	-0.254058	-0.108756	-0.210296	1.28739	0.323669	0.377957	0.214752	-0.336111	-0.800387	-0.144358	0.31279	1.13681	0.277492	-0.193203	-0.132714	0.0780465	-0.27846
-0.316752	0.258448	-0.256565	0.177373	0.675295	-0.155589	0.589105	0.213752	0.883909	0.198648	-0.432042	0.876276	1.39693	0.104855	0.451551	-0.671691	-0.122567	-0.264214	-0.230067	-0.0625414	-0.197802	1.32683	0.301164	0.437455	0.262524	-0.42418	-0.846115	-0.14851	0.284945	1.09892	0.271052	-0.173117	-0.132897	0.113576	-0.270617
-0.297572	0.254232	-0.25637	0.173034	0.700522	-0.123079	0.668124	0.240405	0.949589	0.227828	-0.441497	0.925735	1.43831	0.12661	0.485174	-0.617362	-0.090964	-0.248965	-0.172808	-0.0484463	-0.247627	1.39478	0.304922	0.480917	0.255943	-0.380581	-0.969928	-0.18347	0.274812	1.04055	0.251491	-0.192623	-0.180172	0.0924768	-0.28316
-0.300727	0.245004	-0.254527	0.156743	0.701293	-0.112199	0.745638	0.234671	0.95759	0.243663	-0.45602	0.960349	1.45217	0.139973	0.49232	-0.578621	-0.0560313	-0.22546	-0.123592	-0.0919175	-0.276643	1.46312	0.278666	0.527299	0.209082	-0.406573	-1.04433	-0.184341	0.261584	1.00132	0.259576	-0.231052	-0.189269	0.0374864	-0.26452
-0.314775	0.2476	-0.247391	0.141968	0.720693	-0.097654	0.798217	0.263054	0.962893	0.24251	-0.497269	0.964446	1.44952	0.16996	0.507936	-0.554055	-0.0640941	-0.312519	-0.118048	-0.12408	-0.301383	1.50675	0.341361	0.523926	0.117668	-0.33825	-1.06637	-0.180555	0.293779	0.98956	0.228756	-0.258548	-0.157046	0.0283275	-0.237783
-0.300957	0.233724	-0.2423	0.175637	0.731508	-0.10316	0.802115	0.226156	0.95409	0.218415	-0.520178	0.987939	1.42404	0.177356	0.495644	-0.567913	-0.0998123	-0.310771	-0.111304	-0.143111	-0.251511	1.50281	0.308817	0.528938	0.0241684	-0.368289	-1.03113	-0.153092	0.322405	0.976691	0.191155	-0.262248	-0.124257	0.0054135	-0.203448
-0.312386	0.244409	-0.243145	0.141668	0.693246	-0.117299	0.8195	0.258331	0.939204	0.219884	-0.530014	0.960482	1.41438	0.184518	0.47701	-0.598359	-0.133414	-0.301204	-0.135713	-0.110135	-0.22729	1.53364	0.313964	0.597692	-0.0180391	-0.40713	-1.03177	-0.167335	0.362933	0.942708	0.182246	-0.335252	-0.14181	-0.0856957	-0.278669
-0.283979	0.237282	-0.229172	0.157357	0.652099	-0.126526	0.817587	0.23121	0.904586	0.252648	-0.506071	0.942695	1.42211	0.172375	0.481314	-0.611278	-0.141886	-0.290733	-0.135052	-0.104518	-0.216061	1.57208	0.284757	0.693072	-0.014984	-0.509662	-1.04395	-0.154021	0.381078	0.936813	0.178189	-0.338498	-0.17301	-0.0893406	-0.286219
-0.286471	0.242543	-0.227751	0.159609	0.647739	-0.159237	0.769343	0.261758	0.860409	0.263878	-0.490794	0.822197	1.43666	0.17562	0.486062	-0.6834	-0.122451	-0.343562	-0.144488	-0.0338246	-0.223672	1.64722	0.310961	0.798359	0.0287294	-0.45236	-1.02329	-0.141921	0.424824	0.94777	0.186102	-0.341158	-0.189763	-0.0985843	-0.312682
-0.29817	0.249224	-0.230408	0.18904	0.675191	-0.167451	0.699111	0.241964	0.84224	0.292109	-0.498964	0.779177	1.45361	0.184256	0.502178	-0.68361	-0.135139	-0.376609	-0.146497	-0.0266397	-0.259367	1.68867	0.355466	0.885861	0.0106059	-0.418612	-1.00521	-0.10105	0.438438	1.00214	0.181853	-0.299063	-0.204275	0.0122352	-0.339618
-0.330197	0.254987	-0.229499	0.137433	0.678646	-0.190607	0.673341	0.260595	0.864285	0.292588	-0.488658	0.685804	1.45277	0.203851	0.51779	-0.697216	-0.14938	-0.339912	-0.190535	-0.0238461	-0.259332	1.69453	0.43676	0.953703	0.0081099	-0.395526	-1.00482	-0.171305	0.43223	1.02054	0.196867	-0.318278	-0.287976	-0.0591436	-0.350597
-0.351569	0.262595	-0.228671	0.0989413	0.666541	-0.19613	0.697813	0.307845	0.890849	0.315268	-0.452905	0.70687	1.44357	0.229998	0.507209	-0.701194	-0.179556	-0.320316	-0.190571	0.0170178	-0.270477	1.67316	0.510158	0.983601	-0.0328308	-0.358876	-0.964211	-0.194654	0.419542	1.02803	0.184031	-0.317128	-0.284032	-0.0647435	-0.332163
-0.327772	0.263826	-0.225734	0.0925364	0.649264	-0.213212	0.668672	0.31088	0.921044	0.328278	-0.482429	0.641436	1.43053	0.230095	0.48681	-0.687143	-0.182729	-0.331463	-0.116962	0.134674	-0.257154	1.64702	0.554595	0.933516	-0.0075646	-0.325515	-0.969149	-0.233706	0.385457	1.03212	0.148289	-0.286352	-0.271423	-0.0907142	-0.28941
-0.306836	0.297132	-0.239848	0.125408	0.661698	-0.221081	0.663328	0.367694	0.916946	0.337233	-0.507477	0.609766	1.41852	0.20368	0.45163	-0.728242	-0.215399	-0.399153	-0.0658378	0.129839	-0.310663	1.61174	0.539622	0.928824	-0.0158622	-0.244015	-0.944839	-0.220395	0.356822	0.994375	0.10118	-0.237654	-0.199772	0.0614169	-0.256986
-0.302056	0.308078	-0.244103	0.0980175	0.665944	-0.245647	0.642811	0.38989	0.924861	0.345489	-0.604668	0.523914	1.43526	0.159696	0.470313	-0.69844	-0.252933	-0.427538	-0.0289282	0.155023	-0.336699	1.59506	0.57481	0.904537	0.0453397	-0.30727	-1.03329	-0.253604	0.279207	0.944676	0.0957744	-0.194393	-0.180663	0.182332	-0.169802
-0.301147	0.286086	-0.249858	0.0522098	0.677427	-0.262284	0.688178	0.40005	0.905011	0.329008	-0.590347	0.500171	1.44411	0.124061	0.461651	-0.753101	-0.275753	-0.408641	-0.0589026	0.0746318	-0.354658	1.58492	0.588677	0.901712	0.113975	-0.386295	-1.0521	-0.265329	0.226878	0.877239	0.121099	-0.147725	-0.18402	0.229711	-0.0731857
-0.296694	0.265147	-0.25651	0.0086115	0.693524	-0.270175	0.685206	0.396815	0.884843	0.331989	-0.610048	0.494225	1.48321	0.128192	0.483522	-0.754368	-0.271256	-0.369484	-0.0584599	0.0322749	-0.357408	1.5864	0.617218	0.87233	0.206824	-0.437455	-1.0895	-0.201567	0.177187	0.859951	0.137444	-0.0919241	-0.197266	0.121202	-0.0314139
-0.262631	0.231892	-0.249035	0.0204048	0.71603	-0.265942	0.692673	0.386941	0.881639	0.323996	-0.592273	0.549085	1.49007	0.117586	0.462404	-0.791304	-0.288677	-0.368637	-0.0506091	0.0064479	-0.363364	1.56372	0.541824	0.818101	0.223786	-0.400071	-1.07084	-0.176306	0.168783	0.851368	0.119302	-0.122805	-0.211037	0.0099619	-0.145433
-0.222012	0.241565	-0.253151	0.0458438	0.754684	-0.269186	0.650555	0.462941	0.890309	0.343257	-0.595583	0.523648	1.51632	0.142947	0.451486	-0.830616	-0.326095	-0.341426	-0.0673088	0.0212431	-0.373262	1.52905	0.526891	0.795173	0.182833	-0.311611	-1.06772	-0.176855	0.180722	0.842066	0.0616564	-0.112557	-0.193105	0.0692181	-0.288691
-0.239245	0.230009	-0.246739	0.0303918	0.739	-0.278426	0.609286	0.466658	0.889789	0.362698	-0.612868	0.5331	1.5093	0.12723	0.432658	-0.875625	-0.367272	-0.328234	-0.0688099	0.128252	-0.346977	1.45986	0.466514	0.766739	0.0863677	-0.347693	-1.04182	-0.271156	0.159327	0.810372	0.0528087	-0.224079	-0.205656	0.152997	-0.348258
-0.323075	0.250403	-0.261584	0.0314123	0.712473	-0.293028	0.603627	0.474991	0.85489	0.366034	-0.579862	0.536093	1.50058	0.127931	0.401782	-0.892008	-0.346404	-0.297646	-0.0549491	0.150758	-0.373812	1.41852	0.41144	0.832463	0.0801497	-0.345694	-1.07631	-0.28636	0.131952	0.808393	0.0729162	-0.250504	-0.262976	0.241755	-0.344119
-0.384969	0.231673	-0.253327	-0.0114273	0.684208	-0.288128	0.639537	0.380305	0.776382	0.365858	-0.562604	0.511548	1.50102	0.0945646	0.403991	-0.903018	-0.371229	-0.286291	-0.0405669	0.117364	-0.386298	1.36338	0.368261	0.875855	0.02996	-0.402596	-1.10616	-0.297652	0.105199	0.804952	0.101024	-0.337694	-0.312431	0.132254	-0.358393
-0.364738	0.231122	-0.272559	-0.0366112	0.698432	-0.284196	0.689715	0.36415	0.762511	0.339501	-0.536059	0.460877	1.50516	0.0678582	0.368457	-0.920027	-0.391839	-0.286584	-0.036455	0.0172498	-0.43039	1.34907	0.436724	0.942072	0.011519	-0.272838	-1.14589	-0.247142	0.0992172	0.844898	0.0627581	-0.311842	-0.351217	0.113773	-0.414921
-0.32559	0.213559	-0.285887	-0.0505011	0.71475	-0.289727	0.675185	0.388388	0.744238	0.301122	-0.544383	0.41402	1.4903	0.0315622	0.337432	-0.971188	-0.448943	-0.284062	-0.062684	-0.0021062	-0.411491	1.3233	0.48146	0.962345	-0.0816518	-0.193799	-1.10819	-0.203447	0.101516	0.869655	0.0198823	-0.317617	-0.364666	0.0987994	-0.422187
-0.317433	0.199666	-0.308793	-0.03068	0.67939	-0.325703	0.671253	0.466911	0.725692	0.264457	-0.540768	0.445355	1.46816	0.0024186	0.298426	-0.973735	-0.434421	-0.334736	-0.0518331	0.0257252	-0.410874	1.32455	0.47325	0.967912	-0.118712	-0.153045	-1.12237	-0.153042	0.0950009	0.925072	0.0156159	-0.389045	-0.434701	0.119333	-0.358069
-0.377135	0.163908	-0.316043	-0.0083687	0.674795	-0.353799	0.678234	0.551655	0.703038	0.235797	-0.477719	0.492892	1.46234	-0.0436625	0.294131	-0.977132	-0.439094	-0.420242	-0.0416637	0.0561962	-0.413001	1.35508	0.423485	0.925246	-0.176758	-0.180761	-1.10801	-0.0799442	0.104029	0.941971	0.0252585	-0.414411	-0.415463	0.129596	-0.379556
-0.41404	0.16241	-0.316703	-0.0331125	0.653733	-0.356483	0.764967	0.554554	0.71192	0.247791	-0.409547	0.442799	1.46186	-0.0652964	0.32728	-0.897465	-0.427154	-0.451962	-0.0256482	-0.0406238	-0.412922	1.39193	0.450868	0.895999	-0.185042	-0.275245	-1.15364	-0.0776514	0.0973238	0.98448	0.0376729	-0.404647	-0.429348	0.152894	-0.379598
-0.453962	0.162991	-0.323734	-0.0598153	0.656896	-0.379907	0.811835	0.561851	0.738249	0.261814	-0.316876	0.456044	1.46467	-0.0900176	0.33082	-0.86432	-0.431619	-0.518489	-0.0360998	-0.0606161	-0.403746	1.4368	0.483461	0.909242	-0.206257	-0.261623	-1.14786	-0.0784483	0.096261	0.9841	0.0344959	-0.388319	-0.37898	0.167454	-0.439118
-0.41775	0.172422	-0.32767	-0.0624573	0.627878	-0.41389	0.864323	0.60128	0.731282	0.266743	-0.254275	0.398049	1.4572	-0.118644	0.325026	-0.858846	-0.449974	-0.516238	-0.0333768	-0.0536791	-0.372068	1.46159	0.498717	0.934765	-0.223975	-0.282957	-1.16859	-0.126567	0.0988661	0.978235	0.0082789	-0.360113	-0.409771	0.143875	-0.393344
-0.410115	0.163199	-0.323577	-0.079486	0.620616	-0.474026	0.928124	0.600365	0.703752	0.27818	-0.179075	0.362799	1.49247	-0.138369	0.333291	-0.882572	-0.437173	-0.558169	-0.03518	-0.0389695	-0.368494	1.47233	0.517285	0.995371	-0.189271	-0.331137	-1.15659	-0.155063	0.0593801	0.999989	-0.0147876	-0.37795	-0.428242	0.0347917	-0.41836
-0.383248	0.16173	-0.328702	-0.0991743	0.613028	-0.481568	0.997533	0.610629	0.692436	0.26071	-0.151267	0.284458	1.51451	-0.143943	0.358801	-0.895123	-0.445268	-0.553638	-0.0434548	-0.0998272	-0.342672	1.45492	0.579113	1.01469	-0.188864	-0.40245	-1.13966	-0.210308	0.0682092	1.0445	-0.06742	-0.335971	-0.432688	0.0146813	-0.424527
-0.43165	0.162282	-0.33451	-0.115193	0.614027	-0.485839	1.04832	0.559534	0.696032	0.267941	-0.0830235	0.272114	1.52724	-0.127239	0.399447	-0.870335	-0.40064	-0.566546	-0.0477326	-0.111563	-0.345802	1.42691	0.617209	1.0735	-0.184714	-0.385152	-1.11171	-0.239385	0.0230016	1.08584	-0.0703266	-0.396987	-0.427998	-0.0657192	-0.497633
-0.424694	0.176512	-0.353757	-0.0928805	0.561153	-0.495437	1.00267	0.512736	0.682017	0.258557	-0.0559424	0.360353	1.51564	-0.109653	0.417743	-0.862657	-0.405382	-0.536523	-0.0710121	-0.0234807	-0.315434	1.43372	0.618873	1.06375	-0.247238	-0.252955	-1.08673	-0.213568	0.0508666	1.07809	-0.10498	-0.341303	-0.374985	-0.0528421	-0.478935
-0.498348	0.200647	-0.364917	-0.0559043	0.57439	-0.526296	0.965247	0.475192	0.669092	0.270477	0.036558	0.376214	1.50421	-0.124532	0.444988	-0.849771	-0.384702	-0.526445	-0.078982	0.0799658	-0.335465	1.44145	0.617025	1.06811	-0.188967	-0.185281	-1.08216	-0.180223	0.0406502	1.10169	-0.12035	-0.296191	-0.377933	-0.0711468	-0.475304
-0.50685	0.203591	-0.374057	-0.0396933	0.544542	-0.552151	0.918827	0.434517	0.6063	0.236501	0.0657345	0.417743	1.48459	-0.127611	0.425257	-0.865887	-0.342898	-0.471713	-0.107509	0.102025	-0.325663	1.46049	0.660146	1.03925	-0.139647	-0.226355	-1.07593	-0.214168	0.055679	1.14207	-0.100041	-0.272101	-0.359568	-0.0188961	-0.408402
-0.551272	0.198168	-0.375502	-0.0673531	0.578283	-0.526762	0.891832	0.446231	0.589547	0.238764	0.157045	0.367936	1.45963	-0.142525	0.401536	-0.897326	-0.337158	-0.520392	-0.137326	0.0347014	-0.338319	1.44713	0.722869	1.06833	-0.119885	-0.320681	-1.06206	-0.268898	0.0246453	1.17436	-0.110729	-0.242694	-0.37331	-0.0081128	-0.417517
-0.51888	0.18596	-0.366236	-0.0862126	0.578381	-0.510856	0.831599	0.474623	0.623941	0.227325	0.188368	0.414557	1.43612	-0.141266	0.364468	-0.919494	-0.345281	-0.513762	-0.181887	0.0005073	-0.322632	1.45935	0.652958	1.06126	-0.183848	-0.228379	-1.05209	-0.307122	0.0198468	1.19034	-0.118448	-0.249473	-0.327314	0.0488814	-0.439689
-0.477601	0.187632	-0.356023	-0.109032	0.583313	-0.488982	0.81511	0.499379	0.66935	0.250179	0.201286	0.423706	1.43337	-0.148257	0.395926	-0.928411	-0.383844	-0.506312	-0.164302	-0.0039666	-0.306809	1.47447	0.436453	1.10035	-0.203423	-0.216887	-1.03481	-0.29382	-0.0103219	1.17965	-0.166682	-0.168007	-0.359286	0.0177136	-0.438652
-0.437369	0.174687	-0.375278	-0.0709303	0.574055	-0.494975	0.815931	0.541029	0.648822	0.237988	0.156174	0.444457	1.45055	-0.139679	0.395642	-0.890478	-0.3606	-0.451028	-0.119162	0.0623838	-0.31167	1.5052	0.244693	1.08176	-0.177581	-0.272319	-1.09626	-0.290228	-0.0263883	1.19257	-0.165209	-0.16845	-0.32878	-0.0207415	-0.393767
-0.423215	0.171494	-0.407248	-0.0558749	0.556059	-0.479339	0.886146	0.605847	0.577697	0.228759	0.176814	0.437452	1.45818	-0.138387	0.405403	-0.876184	-0.289678	-0.440239	-0.0823219	-0.018981	-0.311039	1.52097	0.174854	1.20664	-0.0824902	-0.402779	-1.12975	-0.253024	-0.0291924	1.1496	-0.136809	-0.204533	-0.43752	-0.0631969	-0.326142
-0.414938	0.159589	-0.429222	-0.0349881	0.525322	-0.490065	0.894101	0.600748	0.537835	0.214531	0.220723	0.522374	1.45523	-0.123941	0.351381	-0.821726	-0.269747	-0.497263	-0.0808861	0.0369065	-0.285151	1.55784	0.176159	1.22433	-0.0394202	-0.398673	-1.15282	-0.247043	0.0206453	1.1451	-0.114383	-0.284233	-0.456188	-0.0651211	-0.285231
-0.372964	0.176507	-0.435336	-0.0435671	0.513167	-0.522771	0.881961	0.570843	0.524432	0.201988	0.294364	0.641319	1.42768	-0.145252	0.324334	-0.823057	-0.279466	-0.562008	-0.123814	0.0924471	-0.259416	1.64174	0.0926138	1.20916	-0.0169399	-0.315312	-1.11303	-0.215264	0.100474	1.12427	-0.104475	-0.306194	-0.488898	-0.121004	-0.319121
-0.335549	0.168312	-0.429142	-0.040791	0.482728	-0.563983	0.789054	0.526481	0.555314	0.186246	0.327942	0.809912	1.41198	-0.146507	0.309623	-0.793229	-0.302762	-0.58236	-0.132198	0.290621	-0.239577	1.74466	0.018974	1.12687	-0.0073289	-0.274044	-1.07944	-0.240263	0.123746	1.11376	-0.0926617	-0.290674	-0.385899	-0.192702	-0.316746
-0.321884	0.184209	-0.436816	0.0018552	0.472635	-0.580986	0.777503	0.468514	0.583837	0.178241	0.324525	0.879327	1.3992	-0.129829	0.313221	-0.768773	-0.283632	-0.604165	-0.145347	0.262033	-0.264885	1.81812	-0.103015	1.06817	0.0477717	-0.31011	-1.08257	-0.217793	0.117977	1.05115	-0.0757253	-0.240137	-0.351076	-0.241478	-0.358732
-0.3048	0.173337	-0.441097	0.0422742	0.469436	-0.568762	0.754576	0.428768	0.612636	0.192988	0.298232	0.913421	1.40435	-0.103306	0.339636	-0.702964	-0.254948	-0.565497	-0.130653	0.243039	-0.238685	1.85495	-0.0383962	1.04619	0.0838148	-0.391741	-1.14057	-0.250587	0.100049	0.960728	-0.0573828	-0.203389	-0.37582	-0.238077	-0.344589
-0.293003	0.176548	-0.444009	0.0724509	0.475158	-0.563469	0.799497	0.356669	0.60778	0.20612	0.28919	0.86626	1.40937	-0.0634553	0.332475	-0.693076	-0.205662	-0.55147	-0.128404	0.135756	-0.286968	1.84982	0.0147735	0.962407	0.0775651	-0.401937	-1.17874	-0.248269	0.0454756	0.909973	-0.0365158	-0.189025	-0.44361	-0.280186	-0.323392
-0.308702	0.175038	-0.459061	0.0479836	0.509975	-0.547027	0.761166	0.417088	0.581454	0.223439	0.302466	0.800358	1.41693	-0.0493055	0.321534	-0.679391	-0.157011	-0.49232	-0.140979	0.121135	-0.283157	1.84232	0.154956	0.873684	0.0430578	-0.384016	-1.24485	-0.259666	-0.0012331	0.931024	-0.0112715	-0.18867	-0.390634	-0.249387	-0.315866
-0.318196	0.181659	-0.473723	-0.0054154	0.51893	-0.540044	0.735845	0.455302	0.561314	0.197214	0.345961	0.685102	1.4193	-0.0121018	0.301048	-0.633972	-0.0544771	-0.499762	-0.172085	0.125771	-0.340271	1.79983	0.154333	0.791284	0.0452955	-0.38174	-1.23197	-0.312906	-0.0598278	1.03737	0.0559464	-0.261939	-0.360761	-0.220402	-0.242319
-0.344874	0.189665	-0.486434	-0.0138194	0.502987	-0.524521	0.733167	0.481021	0.5678	0.200174	0.370033	0.621509	1.41953	-0.0106067	0.310252	-0.557788	-0.0446419	-0.475443	-0.194892	0.181183	-0.30238	1.78375	0.121098	0.693525	0.0749537	-0.498367	-1.23998	-0.409359	-0.0771818	1.14787	0.0933114	-0.24839	-0.279471	-0.0973095	-0.232433
-0.299003	0.189707	-0.485786	0.0002821	0.480037	-0.550917	0.75341	0.495278	0.56174	0.193292	0.419245	0.585885	1.3976	-0.0176503	0.274269	-0.480547	-0.0231186	-0.480239	-0.212647	0.199811	-0.267423	1.74914	0.107633	0.602739	0.118568	-0.579651	-1.21699	-0.481753	-0.0893363	1.2098	0.113558	-0.147069	-0.267289	-0.147631	-0.162518
-0.312524	0.195909	-0.496795	0.0956988	0.408078	-0.577743	0.759246	0.483347	0.570798	0.182761	0.447979	0.645171	1.35812	-0.0540156	0.214051	-0.504636	-0.0429273	-0.468479	-0.229961	0.160253	-0.216554	1.75413	0.0550377	0.540551	0.15678	-0.614727	-1.19217	-0.46862	-0.061233	1.18408	0.0969896	0.024089	-0.242973	-0.185739	-0.121892
-0.244576	0.190523	-0.517155	0.133176	0.378897	-0.63872	0.701703	0.516108	0.513255	0.142676	0.482732	0.687166	1.32805	-0.064905	0.124151	-0.549837	-0.0490971	-0.462478	-0.216763	0.235849	-0.175927	1.78185	-0.164845	0.455371	0.185799	-0.698564	-1.14546	-0.399008	-0.0669323	1.19143	0.0718361	0.115493	-0.244471	-0.345359	-0.0598237
-0.254871	0.198287	-0.516812	0.154484	0.34735	-0.668462	0.604969	0.436783	0.497042	0.131043	0.498654	0.750698	1.32337	-0.0407579	0.104996	-0.574473	-0.101734	-0.470129	-0.227741	0.377442	-0.157566	1.78472	-0.367814	0.419342	0.200934	-0.756655	-1.10245	-0.40694	-0.0206283	1.26961	0.0371814	0.0750932	-0.269595	-0.43832	-0.0358979
-0.224579	0.184686	-0.514362	0.107978	0.34966	-0.701947	0.53502	0.416938	0.473083	0.103901	0.506036	0.771169	1.32289	-0.0334183	0.0974622	-0.570096	-0.149289	-0.442961	-0.240797	0.48953	-0.157024	1.75219	-0.397235	0.401321	0.2456	-0.781274	-1.10142	-0.388134	-0.0280138	1.39664	0.018139	0.0056074	-0.305048	-0.479723	-0.0507344
-0.263859	0.191876	-0.517053	0.0571158	0.310819	-0.670999	0.531756	0.341702	0.492619	0.119732	0.517126	0.731582	1.30798	-0.0320415	0.110934	-0.49716	-0.188049	-0.448955	-0.29005	0.470926	-0.149816	1.67504	-0.159489	0.396972	0.282247	-0.785149	-1.13952	-0.409144	0.0256001	1.37595	-0.0035282	0.0400268	-0.35853	-0.48286	-0.028807
-0.299403	0.195514	-0.549939	0.0509734	0.286045	-0.645015	0.519639	0.356667	0.486462	0.110175	0.560845	0.692395	1.28568	-0.0774234	0.0941829	-0.455391	-0.209705	-0.416789	-0.319659	0.435496	-0.179731	1.63483	-0.0753029	0.374998	0.335193	-0.838584	-1.1624	-0.407713	0.0250936	1.28368	-0.0149128	0.124714	-0.417406	-0.437617	-0.0176414
-0.348504	0.223454	-0.560899	0.0098127	0.260894	-0.627072	0.504149	0.378837	0.466823	0.138291	0.608412	0.612326	1.2852	-0.0571754	0.0827053	-0.39651	-0.217456	-0.328556	-0.352267	0.420677	-0.144245	1.60728	-0.290899	0.301337	0.334043	-0.87625	-1.15288	-0.469628	0.0367902	1.11256	-0.0264561	0.184051	-0.378068	-0.412733	-0.0602508
-0.373815	0.219973	-0.568436	0.012083	0.246625	-0.644126	0.412264	0.433691	0.421636	0.125727	0.635412	0.599286	1.27737	-0.020943	0.0771663	-0.355077	-0.170598	-0.226194	-0.368757	0.48727	-0.129143	1.56306	-0.441034	0.334074	0.368015	-0.872529	-1.15209	-0.466709	0.0164	1.0404	0.0464936	0.207822	-0.336683	-0.460991	-0.0675263
-0.390546	0.208589	-0.563762	-0.0018611	0.194501	-0.674652	0.422537	0.414842	0.342149	0.106561	0.63104	0.539017	1.26033	0.0407872	0.0924368	-0.321755	-0.149196	-0.134842	-0.400102	0.457441	-0.0935974	1.51422	-0.438492	0.336478	0.403676	-0.860367	-1.14891	-0.415945	-0.0366322	0.961712	0.102745	0.229301	-0.241062	-0.534018	-0.0939784
-0.393357	0.182343	-0.566251	0.0522737	0.18388	-0.675721	0.446291	0.387624	0.292061	0.0788847	0.611878	0.521839	1.22469	0.101219	0.0705499	-0.336301	-0.133472	-0.125218	-0.411413	0.433587	-0.119819	1.4625	-0.255661	0.388007	0.43618	-0.833428	-1.16765	-0.325531	-0.073241	0.987358	0.147502	0.264394	-0.198682	-0.600146	-0.0395272
-0.422279	0.192332	-0.573408	0.0612685	0.151998	-0.650671	0.483938	0.302446	0.255693	0.0728469	0.626912	0.496101	1.20517	0.162425	0.0803602	-0.402933	-0.13039	-0.12104	-0.431526	0.419431	-0.159222	1.45038	-0.18319	0.369858	0.443174	-0.775948	-1.10716	-0.331808	-0.125776	0.931434	0.0945721	0.270403	-0.130599	-0.571214	-0.0747502
-0.435129	0.202304	-0.570909	0.0737473	0.156777	-0.638635	0.45248	0.300358	0.32004	0.0910971	0.634262	0.498722	1.19677	0.243629	0.106315	-0.420874	-0.0762931	-0.144141	-0.447537	0.494127	-0.183306	1.4278	-0.20148	0.38486	0.475919	-0.840664	-1.08723	-0.354926	-0.0884743	0.859303	0.0753776	0.234873	-0.122686	-0.501051	-0.0964701
-0.481608	0.223618	-0.581689	0.0869923	0.134126	-0.648943	0.415546	0.277427	0.339485	0.103981	0.669758	0.554193	1.18855	0.283814	0.159603	-0.419127	0.0207604	-0.166734	-0.44217	0.542895	-0.170369	1.41997	-0.299269	0.442334	0.480046	-0.880446	-1.02995	-0.387839	-0.112703	0.733635	0.0891707	0.107144	-0.133539	-0.488111	-0.174527
-0.500221	0.228982	-0.570693	0.126942	0.119723	-0.692279	0.323707	0.294752	0.425113	0.0942981	0.698631	0.575936	1.18163	0.329709	0.181509	-0.36203	0.105782	-0.176567	-0.438422	0.62841	-0.172261	1.41267	-0.430885	0.471796	0.482585	-0.969049	-1.01783	-0.411458	-0.0976023	0.655572	0.139234	0.0554182	-0.155433	-0.40457	-0.156444
-0.529167	0.236435	-0.583395	0.120686	0.107136	-0.697646	0.289288	0.266203	0.413794	0.0480544	0.698616	0.596561	1.14609	0.307882	0.155137	-0.387916	0.180443	-0.168695	-0.443424	0.619979	-0.159588	1.40596	-0.510733	0.522068	0.474267	-0.899539	-0.965308	-0.411246	-0.159361	0.680976	0.176897	0.0793836	-0.160779	-0.406725	-0.0738703
-0.51341	0.235737	-0.586586	0.095083	0.110667	-0.671846	0.241673	0.256585	0.41857	0.013816	0.701591	0.556816	1.10133	0.300416	0.123665	-0.361836	0.191796	-0.144016	-0.453876	0.630556	-0.164344	1.36009	-0.4648	0.437902	0.446058	-0.836602	-0.949507	-0.391042	-0.142016	0.666041	0.190336	0.171175	-0.136878	-0.396459	-0.0337676
-0.501009	0.261466	-0.595172	0.0920459	0.0979084	-0.652468	0.246103	0.264141	0.329985	0.0284512	0.635504	0.535973	1.05747	0.286431	0.101494	-0.321656	0.236172	-0.119864	-0.455598	0.547483	-0.107618	1.29886	-0.43743	0.407747	0.447239	-0.768007	-0.992286	-0.330319	-0.177781	0.678635	0.150209	0.240536	-0.119695	-0.500376	0.0215114
-0.486901	0.273177	-0.590071	0.104078	0.0521454	-0.678773	0.212311	0.236961	0.328204	0.0350929	0.604801	0.504731	1.04037	0.276682	0.120884	-0.314449	0.281945	-0.101332	-0.453335	0.517844	-0.0689906	1.23511	-0.346421	0.343941	0.429483	-0.77059	-1.01699	-0.332363	-0.136177	0.569212	0.142327	0.250854	-0.123583	-0.664851	0.0251332
-0.529905	0.282604	-0.583442	0.104526	-0.0108173	-0.680224	0.174697	0.241404	0.3408	0.0087667	0.560175	0.49031	1.0179	0.24923	0.116911	-0.317988	0.322245	-0.100148	-0.48291	0.481274	-0.0482715	1.1768	-0.269433	0.346713	0.483142	-0.783821	-1.01566	-0.362081	-0.110704	0.511107	0.120965	0.285177	-0.137334	-0.704003	0.0979986
-0.566359	0.272554	-0.591357	0.0860448	-0.0466588	-0.679951	0.109377	0.274509	0.366053	-0.026229	0.551525	0.466215	0.998904	0.229266	0.109821	-0.347699	0.369225	-0.139525	-0.519346	0.488662	-0.0448385	1.10174	-0.0886086	0.336516	0.480724	-0.800188	-0.981228	-0.441697	-0.101756	0.463658	0.170913	0.313257	-0.107781	-0.673774	0.0975696
-0.610328	0.270071	-0.590205	0.0624777	-0.0598545	-0.634045	0.0513688	0.278583	0.374827	-0.0579357	0.554477	0.457837	0.95999	0.238007	0.0863308	-0.289261	0.456175	-0.0742826	-0.534471	0.536686	-0.0584421	1.0493	-0.0123746	0.323637	0.472243	-0.755777	-0.982135	-0.496385	-0.134277	0.481959	0.250669	0.298557	-0.089741	-0.549896	0.104077
-0.618087	0.278446	-0.581388	0.0447286	-0.0606783	-0.641071	0.003045	0.232514	0.348201	-0.0608118	0.56233	0.430917	0.957532	0.28519	0.0983505	-0.243964	0.585912	-0.0250982	-0.518748	0.604993	-0.056717	0.979494	-0.0794178	0.281625	0.425505	-0.796006	-1.0056	-0.56841	-0.18007	0.57485	0.378184	0.278533	-0.1059	-0.479071	0.0222674
-0.639743	0.274802	-0.563101	0.0358363	-0.0392429	-0.62634	-6.77e-05	0.159523	0.36106	-0.071368	0.564354	0.423138	0.963342	0.315605	0.121742	-0.200899	0.667472	0.0765227	-0.500292	0.627525	-0.0548447	0.911473	-0.284189	0.22068	0.400279	-0.82416	-1.08078	-0.595927	-0.201405	0.62792	0.487473	0.236967	-0.0981618	-0.454722	-0.021203
-0.650261	0.261023	-0.569679	0.0323186	-0.0177915	-0.628592	0.001701	0.132549	0.325474	-0.0872495	0.55035	0.402691	0.968109	0.35341	0.109919	-0.220319	0.753682	0.0545378	-0.490357	0.597299	-0.0491859	0.840744	-0.454887	0.163096	0.42099	-0.818142	-1.05442	-0.578002	-0.264753	0.710562	0.625488	0.222562	-0.0741281	-0.314169	-0.0432561
-0.655748	0.245845	-0.576841	0.0529046	-0.0398769	-0.628237	-0.042177	0.148067	0.345616	-0.0920861	0.519442	0.419807	0.954553	0.350102	0.0957842	-0.213669	0.814287	0.0598108	-0.475097	0.596141	-0.0553536	0.794926	-0.428863	0.178169	0.531369	-0.818983	-1.03943	-0.519249	-0.393859	0.652407	0.748996	0.267952	-0.0046421	-0.329333	0.0352208
-0.65487	0.252627	-0.57962	0.019921	-0.058429	-0.628271	-0.0726599	0.147105	0.336197	-0.0882553	0.510399	0.388318	0.937362	0.357367	0.107175	-0.171382	0.921815	0.0535181	-0.499848	0.557785	-0.0382042	0.758341	-0.336958	0.146354	0.654005	-0.733935	-0.998874	-0.50343	-0.481663	0.573699	0.91103	0.321035	0.0009014	-0.364868	0.128978
-0.655251	0.268442	-0.569216	0.0190321	-0.0965576	-0.609029	-0.0925461	0.189725	0.359824	-0.0650606	0.473993	0.378198	0.928136	0.344611	0.119944	-0.124036	0.973091	0.14273	-0.53332	0.494869	-0.0153558	0.703166	-0.15075	0.108705	0.722477	-0.675211	-1.02969	-0.488364	-0.563373	0.452674	0.987816	0.441767	0.0424088	-0.476255	0.189942
-0.665544	0.282535	-0.576492	0.0023872	-0.093092	-0.60174	-0.0960099	0.211962	0.365974	-0.0493612	0.456254	0.284063	0.926537	0.350892	0.159789	-0.08806	1.03656	0.205565	-0.569399	0.463679	0.0154961	0.638392	-0.0138705	-0.018301	0.720332	-0.610078	-1.01635	-0.487868	-0.640965	0.406678	1.05328	0.521204	0.0684849	-0.464373	0.165651
-0.654933	0.278175	-0.582878	0.0251263	-0.112227	-0.581343	-0.0857541	0.199352	0.370866	-0.0488585	0.428854	0.252812	0.933032	0.32295	0.158914	-0.0930303	1.10527	0.267154	-0.556814	0.400968	0.0286186	0.581322	0.217849	-0.0175173	0.708715	-0.515913	-0.995525	-0.421704	-0.696112	0.384047	1.12118	0.59214	0.133425	-0.286472	0.149104
-0.679556	0.276692	-0.589524	0.0559874	-0.136132	-0.580777	-0.10468	0.185109	0.338699	-0.0469508	0.463795	0.216629	0.950623	0.322709	0.184119	-0.0569753	1.21718	0.26477	-0.507567	0.429729	0.0692827	0.515789	0.269956	0.0223442	0.687043	-0.483739	-0.995068	-0.404267	-0.701789	0.358978	1.20205	0.514046	0.129323	-0.26564	0.106617
-0.716898	0.267169	-0.584507	0.0406224	-0.148225	-0.559778	-0.111519	0.151608	0.318128	-0.0522763	0.486107	0.231686	0.952437	0.284776	0.197772	-0.0308383	1.30823	0.278299	-0.502491	0.371659	0.0773601	0.467283	0.281756	0.0973582	0.70557	-0.374705	-1.00722	-0.41663	-0.677863	0.328847	1.25547	0.475913	0.141896	-0.144773	0.218702
-0.70396	0.25812	-0.591344	-0.003087	-0.180171	-0.567874	-0.137929	0.124892	0.312652	-0.0745908	0.490415	0.184108	0.930363	0.283629	0.180396	-0.0273338	1.32034	0.314151	-0.50809	0.358256	0.106318	0.400134	0.178541	0.128373	0.675288	-0.362069	-0.945536	-0.421182	-0.650454	0.364912	1.24708	0.34126	0.172446	-0.255331	0.128819
-0.642947	0.250736	-0.588546	-0.0637811	-0.167919	-0.556613	-0.145545	0.0872713	0.312451	-0.0822383	0.519003	0.0547354	0.91889	0.288827	0.151067	0.009173	1.31378	0.304035	-0.525883	0.297624	0.126786	0.355425	0.133319	0.153352	0.687876	-0.38486	-0.909502	-0.470523	-0.636126	0.4117	1.23789	0.326666	0.211481	-0.268559	0.161918
-0.581125	0.24816	-0.581479	-0.0418733	-0.208324	-0.570843	-0.196047	0.100096	0.281419	-0.0949587	0.515896	-0.0015504	0.906017	0.317557	0.10268	0.0332547	1.24243	0.289323	-0.528199	0.359804	0.169737	0.295144	0.202209	0.151331	0.614079	-0.342369	-0.871407	-0.480573	-0.62178	0.426081	1.18983	0.446641	0.308926	-0.405756	0.16791
-0.579965	0.244897	-0.575941	-0.0147258	-0.208895	-0.586814	-0.20852	0.162638	0.220703	-0.103776	0.519982	-0.0192921	0.889389	0.279705	0.059562	0.0705809	1.20081	0.229408	-0.519312	0.397473	0.189003	0.262143	0.177487	0.176731	0.588551	-0.319225	-0.871479	-0.516592	-0.60953	0.431701	1.14802	0.726321	0.34574	-0.443468	0.339774
-0.590551	0.220815	-0.570994	-0.0262734	-0.225899	-0.610148	-0.24147	0.160068	0.171253	-0.121058	0.466958	-0.0011191	0.887259	0.232218	0.0487129	0.0699162	1.18033	0.167297	-0.523528	0.412478	0.205927	0.233358	0.133192	0.173502	0.570608	-0.368597	-0.847661	-0.465389	-0.65854	0.444896	1.1083	0.983083	0.406308	-0.457028	0.45562
-0.595088	0.192392	-0.582983	-0.0577763	-0.197933	-0.600809	-0.230541	0.140938	0.141082	-0.134211	0.43879	-0.0765757	0.882478	0.186077	0.0401109	0.0695059	1.17746	0.111396	-0.490608	0.394061	0.196015	0.206912	0.0192833	0.162492	0.550123	-0.392302	-0.828056	-0.427766	-0.672818	0.462883	1.07039	1.11847	0.41299	-0.449206	0.555167
-0.593114	0.15656	-0.57317	-0.0466019	-0.216274	-0.592307	-0.227986	0.114798	0.135392	-0.156017	0.409021	-0.149512	0.861522	0.150551	0.0488662	0.0645441	1.11438	0.0845354	-0.478497	0.370005	0.176819	0.181124	0.023338	0.118215	0.475706	-0.39229	-0.787716	-0.399734	-0.691885	0.476701	1.01705	1.20142	0.438759	-0.470003	0.647818
-0.636855	0.155193	-0.583036	-0.0057885	-0.20552	-0.584944	-0.252483	0.125817	0.133167	-0.159318	0.407508	-0.206617	0.83928	0.103399	0.0466591	0.0750489	1.03716	0.0652039	-0.465816	0.405683	0.13248	0.14114	0.10378	0.0945824	0.415656	-0.326214	-0.811053	-0.378374	-0.696396	0.556216	0.951245	1.30648	0.44089	-0.427592	0.7208

## Sheet: Hotplate Cluster 2 hot
0.025921	-0.04788	-0.55419	-0.62349	0.112877	0.167305	-0.18594	1.15754	0.599349	-0.01484	0.403371	0.163777	0.382346	0.752616	0.609596	1.19163
-0.02056	-0.06778	-0.53949	-0.62712	0.104388	0.173901	-0.13602	1.14481	0.586677	0.020217	0.471162	0.18865	0.401649	0.736319	0.628503	1.23812
-0.03387	-0.09315	-0.46563	-0.62416	0.12723	0.098313	-0.05659	1.16703	0.574434	0.088354	0.516676	0.211758	0.474792	0.745578	0.614673	1.27971
-0.05669	-0.09583	-0.45361	-0.64821	0.138933	0.053023	-0.01249	1.19795	0.516103	0.115738	0.593526	0.258985	0.455758	0.742776	0.587835	1.25287
-0.0457	-0.10245	-0.38902	-0.66043	0.16721	0.052541	0.036408	1.20449	0.516586	0.098948	0.586997	0.25526	0.438178	0.724881	0.569687	1.24957
-0.07717	-0.09318	-0.3744	-0.70316	0.202677	0.024056	0.064778	1.22171	0.53549	0.069172	0.570224	0.232298	0.400358	0.710194	0.528824	1.27951
-0.1218	-0.12306	-0.3851	-0.71259	0.250566	0.097476	0.107827	1.23942	0.588049	0.072571	0.462658	0.187828	0.410954	0.708771	0.532035	1.29533
-0.1791	-0.12699	-0.41267	-0.73795	0.276188	0.013052	0.158763	1.28279	0.617891	0.107566	0.422235	0.184485	0.396977	0.708214	0.501691	1.2709
-0.20891	-0.13445	-0.41252	-0.70039	0.296731	-0.04076	0.168257	1.29479	0.601071	0.096571	0.392763	0.193798	0.353652	0.700107	0.516342	1.24283
-0.17906	-0.10028	-0.40764	-0.70404	0.253202	-0.0659	0.182104	1.30973	0.598536	0.077661	0.443503	0.18662	0.417126	0.716945	0.496679	1.26436
-0.19385	-0.11393	-0.41436	-0.71013	0.212259	-0.00522	0.162217	1.33232	0.580872	0.037698	0.48479	0.138941	0.42411	0.755671	0.506698	1.2842
-0.15732	-0.13617	-0.46948	-0.76056	0.130253	0.006762	0.187528	1.34204	0.596295	0.030527	0.531013	0.125529	0.457915	0.800689	0.440551	1.30228
-0.14667	-0.1499	-0.47893	-0.76649	0.122128	-0.01081	0.189957	1.32403	0.602465	0.0164	0.552604	0.081148	0.371469	0.832101	0.430462	1.28627
-0.04328	-0.12627	-0.52484	-0.74302	0.135853	-0.0252	0.191649	1.27268	0.583838	0.011463	0.574128	0.080036	0.346776	0.855541	0.408434	1.26959
0.039299	-0.07196	-0.54598	-0.71532	0.149526	-0.00785	0.184845	1.25757	0.585915	0.000256	0.546123	0.082107	0.36451	0.877043	0.470671	1.2369
0.069276	-0.02635	-0.57661	-0.70231	0.120012	-0.02252	0.154343	1.22864	0.521317	-0.03573	0.557582	0.142018	0.371854	0.87761	0.461662	1.23841
0.050482	-0.00769	-0.57272	-0.70334	0.092377	-0.02807	0.135947	1.24881	0.465882	-0.02239	0.535948	0.211789	0.438661	0.89314	0.482671	1.23771
-0.04564	-0.02952	-0.53435	-0.72682	0.082753	0.080522	0.140679	1.2307	0.418491	-0.03461	0.6415	0.187918	0.429553	0.902325	0.509915	1.28657
-0.08106	-0.06852	-0.51271	-0.76659	0.114783	0.159878	0.173776	1.25779	0.453128	-0.01681	0.659912	0.172858	0.398275	0.912341	0.565062	1.30681
-0.11669	-0.05269	-0.4936	-0.79145	0.090508	0.183388	0.202177	1.2292	0.476417	-0.039	0.696139	0.166646	0.359033	0.899539	0.570394	1.29723
-0.10516	-0.04864	-0.49532	-0.76035	0.046489	0.125375	0.206641	1.25521	0.458151	0.016545	0.586392	0.236421	0.397696	0.894927	0.521016	1.26661
-0.08913	-0.02551	-0.49435	-0.72013	-0.0081	0.047594	0.192556	1.25811	0.43303	0.059718	0.565373	0.242281	0.435411	0.892596	0.44105	1.27137
-0.12137	-0.05749	-0.54088	-0.68147	-0.00265	0.076832	0.166388	1.21141	0.425783	0.039668	0.510008	0.214931	0.444093	0.904127	0.367464	1.2676
-0.13424	-0.06115	-0.52448	-0.63345	0.033455	0.089871	0.142134	1.17787	0.467523	0.046721	0.493509	0.193334	0.440527	0.915273	0.394071	1.28638
-0.16109	-0.07966	-0.50413	-0.60584	0.076368	0.090652	0.138835	1.16163	0.527346	0.052573	0.488254	0.217121	0.489145	0.929405	0.412701	1.31166
-0.16175	-0.12326	-0.44199	-0.58306	0.138531	0.075519	0.133893	1.22429	0.581942	0.086514	0.465078	0.228724	0.512197	0.935942	0.411182	1.34123
-0.20374	-0.13001	-0.43487	-0.61887	0.182068	0.07371	0.108439	1.24196	0.617603	0.054161	0.482775	0.236281	0.456974	0.919552	0.372194	1.3566
-0.24239	-0.12089	-0.47613	-0.63297	0.208795	0.213168	0.049729	1.23629	0.552633	0.012561	0.468015	0.206845	0.445353	0.909062	0.310385	1.33621
-0.24058	-0.07936	-0.49053	-0.60859	0.171879	0.354591	-0.01303	1.20395	0.509262	0.027934	0.455344	0.219446	0.449543	0.891013	0.352942	1.33727
-0.21807	-0.07096	-0.48904	-0.54614	0.174389	0.388071	-0.03523	1.15578	0.40128	0.053992	0.466671	0.253523	0.535061	0.873266	0.336213	1.30089
-0.22197	-0.08543	-0.45702	-0.47197	0.183808	0.362234	-0.04666	1.15624	0.381234	0.103159	0.444097	0.305022	0.546182	0.852517	0.375286	1.26146
-0.19009	-0.08545	-0.46134	-0.44085	0.198484	0.395145	-0.04668	1.14366	0.369293	0.126494	0.49214	0.3414	0.519203	0.851417	0.318001	1.24205
-0.18469	-0.09578	-0.49185	-0.44656	0.2129	0.550917	-0.07324	1.13465	0.386278	0.113897	0.47764	0.314676	0.454666	0.85612	0.293048	1.242
-0.12238	-0.08137	-0.49956	-0.47518	0.2171	0.566784	-0.0826	1.10723	0.439446	0.130182	0.468358	0.305982	0.406482	0.838595	0.283245	1.25968
-0.12633	-0.06458	-0.57071	-0.51648	0.235107	0.500165	-0.12815	1.11155	0.438863	0.050524	0.462428	0.240152	0.328031	0.819276	0.29885	1.22509
-0.06547	-0.04301	-0.61599	-0.54622	0.19158	0.379975	-0.18239	1.13854	0.433508	0.021361	0.406614	0.18999	0.315463	0.819828	0.329393	1.219
-0.0867	-0.03626	-0.66676	-0.56324	0.158958	0.349338	-0.22914	1.12326	0.36692	-0.08178	0.317311	0.119524	0.283841	0.832853	0.339561	1.17754
-0.12109	-0.06569	-0.62408	-0.54884	0.110406	0.297564	-0.2301	1.14307	0.280891	-0.03868	0.270602	0.169155	0.322843	0.825002	0.337223	1.14687
-0.16975	-0.06433	-0.66249	-0.52557	0.119192	0.215107	-0.21259	1.10205	0.21292	-0.04549	0.241397	0.22574	0.284796	0.798492	0.304634	1.09597
-0.14627	-0.08433	-0.68198	-0.51345	0.101918	0.20582	-0.18106	1.11113	0.184985	-0.01397	0.190166	0.291861	0.258842	0.780775	0.277409	1.07843
-0.12102	-0.06473	-0.76522	-0.51972	0.05233	0.223527	-0.14826	1.06152	0.185786	-0.07104	0.130134	0.306237	0.198726	0.756891	0.298861	1.10085
-0.10898	-0.12091	-0.7404	-0.50586	-0.0407	0.282829	-0.11697	1.07117	0.18854	-0.08345	0.110086	0.294484	0.138927	0.726782	0.335112	1.12874
-0.1147	-0.12504	-0.71297	-0.50956	-0.08165	0.264957	-0.10159	1.06744	0.142773	-0.08171	0.192212	0.30351	0.075654	0.711465	0.326536	1.1288
-0.14198	-0.13512	-0.70915	-0.48193	-0.04995	0.181918	-0.07909	1.09985	0.123838	-0.0619	0.145064	0.276449	0.063029	0.701995	0.312795	1.1077
-0.12612	-0.08039	-0.73137	-0.45066	-0.00637	0.105659	-0.04815	1.08724	0.100651	-0.05897	0.15745	0.257401	0.09527	0.7087	0.271905	1.08817
-0.16013	-0.04337	-0.75459	-0.39769	-0.02859	0.000835	-0.02501	1.05953	0.128633	-0.03969	0.104375	0.241614	0.158945	0.69297	0.290391	1.06962
-0.14611	-0.03224	-0.75286	-0.33083	-0.05623	-0.07343	-0.03108	0.987125	0.079579	-0.03585	0.102381	0.263207	0.181601	0.679386	0.26881	1.04014
-0.18893	-0.03984	-0.78393	-0.27441	-0.07549	-0.13222	-0.03184	0.929517	0.052998	-0.04252	0.029009	0.322407	0.204448	0.671305	0.275866	1.01029
-0.20505	-0.07355	-0.84962	-0.22205	-0.03874	-0.20186	-0.0469	0.869698	-0.02618	-0.11714	-0.01224	0.362716	0.226042	0.664685	0.239754	0.991384
-0.23353	-0.07838	-0.84368	-0.18706	0.016894	-0.16131	-0.02892	0.876194	-0.02452	-0.11838	-0.12562	0.456301	0.308614	0.67795	0.228604	0.970238
-0.24587	-0.07894	-0.85491	-0.18213	0.053291	-0.1677	-0.03447	0.907589	-0.0441	-0.16357	-0.22329	0.505325	0.325192	0.669852	0.2118	0.968585
-0.27224	-0.1055	-0.83783	-0.2036	0.023187	-0.17369	-0.01099	0.974316	-0.01385	-0.17555	-0.35817	0.546852	0.309522	0.664736	0.206215	0.955363
-0.30415	-0.12319	-0.87249	-0.23197	-0.02123	-0.22801	-0.02205	0.997478	-0.00293	-0.24136	-0.35701	0.493591	0.266673	0.659453	0.179661	1.00142
-0.34424	-0.18263	-0.84429	-0.20938	-0.06044	-0.21607	-0.0059	1.03043	-0.00678	-0.25352	-0.39248	0.562514	0.285674	0.677872	0.17382	0.991008
-0.34625	-0.17354	-0.79843	-0.19668	-0.0322	-0.20111	0.010367	1.04848	-0.06339	-0.285	-0.3454	0.589014	0.287236	0.661102	0.190902	0.998615
-0.32004	-0.15491	-0.72817	-0.2708	0.026141	-0.20578	0.091483	1.03469	-0.10649	-0.30977	-0.44316	0.62682	0.249039	0.646777	0.182161	0.956421
-0.29241	-0.16699	-0.66889	-0.35054	0.097731	-0.18697	0.137398	1.02068	-0.14886	-0.32798	-0.56106	0.575837	0.164096	0.619808	0.175285	0.92906
-0.2857	-0.23411	-0.64645	-0.37811	0.165126	-0.25384	0.191318	0.994319	-0.19231	-0.30959	-0.67451	0.597407	0.163366	0.598055	0.179597	0.890716
-0.29196	-0.30572	-0.62708	-0.31038	0.141595	-0.32739	0.200668	0.981056	-0.24146	-0.32544	-0.6946	0.623766	0.169437	0.571699	0.172761	0.84674
-0.22491	-0.31637	-0.63932	-0.30115	0.087819	-0.47776	0.190015	0.978161	-0.27215	-0.35352	-0.62743	0.598536	0.184918	0.539226	0.15749	0.832117
-0.1038	-0.27675	-0.62201	-0.29586	-0.03858	-0.44833	0.170825	0.957107	-0.25031	-0.41105	-0.60076	0.546465	0.129672	0.532629	0.098059	0.817839
0.012586	-0.23559	-0.60074	-0.27951	-0.08186	-0.35605	0.140964	0.963244	-0.25112	-0.41234	-0.66419	0.524035	0.126497	0.519945	0.101951	0.842244
0.021887	-0.26248	-0.57403	-0.22978	-0.12675	-0.26246	0.125262	0.946875	-0.29204	-0.41823	-0.71746	0.513842	0.126854	0.527187	0.073949	0.815904
-0.03038	-0.32696	-0.57209	-0.14079	-0.08591	-0.20352	0.097939	0.949853	-0.34615	-0.41924	-0.81695	0.514177	0.205084	0.539237	0.07638	0.805348
-0.04912	-0.3776	-0.59588	-0.10951	-0.12276	-0.25503	0.038932	0.919318	-0.39181	-0.46825	-0.76162	0.484861	0.191795	0.542548	0.018055	0.759679
-0.00764	-0.34681	-0.63493	-0.08223	-0.12401	-0.28574	-0.01726	0.884447	-0.4198	-0.51374	-0.81379	0.466334	0.184487	0.554198	-0.01901	0.752774
0.088062	-0.29837	-0.6761	-0.12136	-0.19855	-0.30955	-0.10559	0.837905	-0.47443	-0.50838	-0.83357	0.434168	0.183039	0.565621	-0.09874	0.744492
0.14202	-0.26011	-0.67807	-0.09411	-0.19342	-0.28327	-0.15823	0.790389	-0.52459	-0.47096	-0.95891	0.458877	0.259576	0.588148	-0.08725	0.72067
0.180164	-0.27321	-0.66992	-0.01793	-0.20902	-0.28145	-0.2135	0.71507	-0.6146	-0.45125	-0.97005	0.537654	0.374144	0.604457	-0.09576	0.65892
0.163292	-0.3191	-0.6496	0.078746	-0.2542	-0.33424	-0.23802	0.667521	-0.69023	-0.47701	-1.00193	0.574852	0.427248	0.608964	-0.0541	0.611953
0.173017	-0.34047	-0.66526	0.134621	-0.376	-0.44596	-0.27538	0.627238	-0.76369	-0.51727	-0.97572	0.543716	0.441264	0.585827	-0.07935	0.561734
0.105293	-0.34803	-0.68227	0.157512	-0.52938	-0.46914	-0.29284	0.598724	-0.82656	-0.55951	-1.14013	0.459819	0.462441	0.519948	-0.09868	0.518923
0.073384	-0.37156	-0.70775	0.224835	-0.64756	-0.5044	-0.29708	0.554452	-0.89825	-0.6342	-1.2645	0.471786	0.486365	0.448395	-0.11475	0.422504
-0.01872	-0.5059	-0.71928	0.314866	-0.81205	-0.49218	-0.30473	0.52806	-0.96919	-0.68814	-1.39405	0.468986	0.565569	0.382609	-0.11293	0.380715
-0.06276	-0.60129	-0.74674	0.426178	-0.98729	-0.63188	-0.31955	0.50013	-1.01459	-0.77074	-1.42443	0.479543	0.578948	0.339945	-0.07467	0.322422
-0.13622	-0.69309	-0.77311	0.550689	-1.11146	-0.65337	-0.35454	0.433895	-1.05562	-0.85547	-1.43147	0.46478	0.650008	0.285172	-0.10357	0.289625
-0.20216	-0.78843	-0.88678	0.649942	-1.17167	-0.67873	-0.38657	0.329763	-1.10583	-0.99887	-1.44162	0.467467	0.600811	0.238992	-0.17529	0.194303
-0.27017	-0.90305	-0.94751	0.756538	-1.18163	-0.67453	-0.42046	0.262241	-1.12083	-1.05635	-1.4538	0.416484	0.613573	0.192347	-0.27375	0.112653
-0.36672	-0.97719	-1.01306	0.860743	-1.26012	-0.66159	-0.4526	0.18279	-1.19161	-1.11705	-1.5147	0.369391	0.600504	0.160852	-0.29514	0.035823
-0.41802	-0.98753	-1.0551	0.975287	-1.34761	-0.6675	-0.48635	0.122788	-1.26265	-1.14682	-1.59092	0.317855	0.661256	0.121549	-0.31025	-0.03259
-0.42323	-0.98356	-1.06434	1.06478	-1.40092	-0.6287	-0.53339	0.055221	-1.35071	-1.22218	-1.60613	0.381577	0.733257	0.064677	-0.31417	-0.10086
-0.38273	-0.95867	-1.09058	1.10629	-1.41523	-0.5407	-0.60723	0.002417	-1.39366	-1.24014	-1.59695	0.385675	0.800068	0.003501	-0.36034	-0.17717
-0.37733	-0.93313	-1.13451	1.16689	-1.37953	-0.51676	-0.65758	-0.08719	-1.42141	-1.29239	-1.62279	0.385902	0.829846	-0.05411	-0.42973	-0.2616
-0.40181	-0.92654	-1.19497	1.19588	-1.3874	-0.51142	-0.72344	-0.1835	-1.43623	-1.29379	-1.70203	0.275667	0.75983	-0.06269	-0.45733	-0.28095
-0.40377	-0.94	-1.17886	1.19757	-1.34261	-0.57454	-0.76489	-0.19234	-1.42914	-1.27365	-1.69986	0.156466	0.747687	-0.03601	-0.4876	-0.25324
-0.40188	-0.97392	-1.11596	1.15869	-1.30339	-0.52174	-0.81078	-0.14809	-1.38723	-1.25185	-1.65119	0.105894	0.771548	-0.01045	-0.47261	-0.23379
-0.36382	-0.99519	-1.07882	1.1005	-1.27155	-0.44941	-0.84562	-0.12165	-1.36552	-1.23889	-1.56472	0.119081	0.816918	0.003779	-0.48823	-0.23331
-0.34381	-0.99816	-1.15036	1.04771	-1.23266	-0.48024	-0.91383	-0.18492	-1.35665	-1.31059	-1.57779	0.119305	0.743718	-0.01344	-0.50345	-0.29505
-0.29128	-0.99009	-1.1839	1.019	-1.22783	-0.50224	-0.97196	-0.22917	-1.35852	-1.31618	-1.6484	0.06555	0.659189	-0.01881	-0.5139	-0.3302
-0.22189	-0.94777	-1.2328	1.0013	-1.13337	-0.52502	-1.00705	-0.22927	-1.3056	-1.33846	-1.72653	0.0084	0.612508	-0.01507	-0.53338	-0.37733
-0.20055	-0.95935	-1.25002	0.957342	-1.06051	-0.54631	-1.02686	-0.1973	-1.28511	-1.29566	-1.80547	-0.00965	0.58669	-0.00076	-0.55589	-0.38689
-0.14919	-0.92602	-1.26631	0.921266	-0.96464	-0.61997	-1.05911	-0.16382	-1.26899	-1.29181	-1.90212	-0.02395	0.549573	-0.00095	-0.5775	-0.3634
-0.15157	-0.89807	-1.25528	0.867989	-0.92709	-0.65652	-1.10831	-0.16132	-1.29914	-1.31832	-1.92975	-0.04501	0.508733	-0.03825	-0.55187	-0.36295
-0.12661	-0.85398	-1.2392	0.797753	-0.92289	-0.73895	-1.15822	-0.15189	-1.2982	-1.34531	-1.88162	-0.10217	0.453177	-0.08375	-0.4981	-0.36341
-0.13493	-0.87123	-1.21543	0.687339	-0.90623	-0.74874	-1.24658	-0.15894	-1.27649	-1.34917	-1.8201	-0.18052	0.413828	-0.12183	-0.42234	-0.38365
-0.14961	-0.93067	-1.18827	0.590846	-0.92688	-0.84951	-1.30198	-0.11856	-1.26554	-1.28271	-1.72452	-0.25789	0.39093	-0.14085	-0.40426	-0.35365
-0.16348	-0.95661	-1.12864	0.504091	-0.90389	-0.84076	-1.33434	-0.04854	-1.25308	-1.21242	-1.68326	-0.311	0.383006	-0.15706	-0.37198	-0.3295
-0.21473	-1.00012	-1.13021	0.45134	-0.9557	-0.93197	-1.32427	-0.02955	-1.30438	-1.16331	-1.58018	-0.33865	0.347761	-0.2014	-0.33304	-0.33506
-0.26677	-1.00423	-1.12713	0.412248	-0.96392	-0.92547	-1.31935	-0.05403	-1.33984	-1.16574	-1.5276	-0.34167	0.319299	-0.27787	-0.22321	-0.40485
-0.29559	-1.05552	-1.12797	0.332808	-1.07895	-0.93249	-1.32406	-0.07864	-1.35907	-1.11375	-1.49813	-0.34698	0.279615	-0.34154	-0.10848	-0.45591
-0.29625	-1.021	-1.02368	0.160528	-1.19029	-0.93353	-1.33424	0.002621	-1.35152	-0.98082	-1.45783	-0.41275	0.21543	-0.38291	-0.01361	-0.45922
-0.29989	-1.05561	-0.96135	-0.05952	-1.31537	-1.00792	-1.35169	0.056237	-1.38519	-0.85132	-1.47159	-0.52723	0.081044	-0.42615	0.030604	-0.43504
-0.30316	-1.02395	-0.94384	-0.22782	-1.40379	-1.06598	-1.3326	0.094617	-1.42782	-0.80049	-1.35619	-0.5937	-0.03094	-0.47575	0.026661	-0.41535
-0.35041	-1.02571	-0.96207	-0.29457	-1.4137	-1.02247	-1.27454	0.067358	-1.45324	-0.77907	-1.36104	-0.59555	-0.11661	-0.50749	0.016415	-0.42555
-0.3641	-0.96198	-0.96588	-0.29776	-1.4343	-0.97749	-1.1732	0.089294	-1.42568	-0.74468	-1.26437	-0.51653	-0.16802	-0.50997	-0.01843	-0.44974
-0.38471	-0.89776	-0.92986	-0.25205	-1.38486	-0.95199	-1.03894	0.119899	-1.40653	-0.70746	-1.18522	-0.45173	-0.20782	-0.50325	-0.05246	-0.45326
-0.38163	-0.84653	-0.91715	-0.22646	-1.35728	-1.01028	-0.91092	0.12777	-1.37894	-0.66935	-1.10326	-0.37767	-0.25463	-0.50186	-0.11797	-0.44601
-0.38713	-0.84431	-0.95242	-0.19184	-1.31055	-0.97426	-0.8104	0.110069	-1.37537	-0.65172	-1.02628	-0.34269	-0.30929	-0.51164	-0.21628	-0.41955
-0.41047	-0.8175	-0.94646	-0.16867	-1.30368	-0.93751	-0.74525	0.06611	-1.36588	-0.63928	-1.02956	-0.32522	-0.39432	-0.52303	-0.28739	-0.43737
-0.38971	-0.79395	-0.92389	-0.13277	-1.26201	-0.92704	-0.69947	0.063295	-1.38401	-0.61842	-0.96169	-0.29752	-0.47413	-0.52972	-0.34187	-0.43186
-0.37193	-0.70836	-0.87301	-0.13569	-1.23302	-0.93971	-0.6507	0.072085	-1.35273	-0.57445	-0.99488	-0.308	-0.51377	-0.52143	-0.35523	-0.43218
-0.35093	-0.67964	-0.83298	-0.14487	-1.20123	-0.95264	-0.62201	0.072458	-1.29332	-0.526	-1.00704	-0.3107	-0.52823	-0.5118	-0.38479	-0.40329
-0.34709	-0.63124	-0.81768	-0.18911	-1.1986	-0.93969	-0.61241	0.078371	-1.22974	-0.49906	-0.9964	-0.37031	-0.56437	-0.52295	-0.41446	-0.41281
-0.34368	-0.60296	-0.74133	-0.18666	-1.19926	-0.94154	-0.62323	0.05072	-1.2096	-0.49989	-0.89577	-0.38856	-0.62092	-0.53894	-0.41583	-0.40995
-0.31429	-0.56862	-0.71494	-0.19408	-1.19678	-0.92435	-0.61804	0.036801	-1.22588	-0.49872	-0.93013	-0.42106	-0.65819	-0.55025	-0.46033	-0.43676
-0.27719	-0.53502	-0.71042	-0.1877	-1.18596	-0.83396	-0.60376	0.008325	-1.22093	-0.51204	-0.88351	-0.4267	-0.67172	-0.55017	-0.5101	-0.44711
-0.20206	-0.47623	-0.75869	-0.19433	-1.18086	-0.81648	-0.59806	0.000799	-1.2157	-0.49048	-0.91419	-0.45017	-0.70027	-0.56547	-0.57784	-0.47003
-0.09831	-0.40421	-0.75576	-0.21142	-1.18907	-0.74722	-0.58876	-0.00934	-1.19252	-0.44742	-0.8097	-0.44689	-0.72213	-0.59066	-0.59682	-0.46241
-0.01342	-0.34217	-0.7337	-0.20984	-1.21548	-0.77132	-0.58128	-0.0204	-1.17237	-0.40725	-0.76282	-0.43289	-0.69622	-0.61476	-0.63202	-0.47311
0.095623	-0.2944	-0.71296	-0.22812	-1.25336	-0.69817	-0.57082	-0.06948	-1.1648	-0.36691	-0.76769	-0.44107	-0.71032	-0.63512	-0.65924	-0.47452
0.134774	-0.28063	-0.71335	-0.21047	-1.24675	-0.72544	-0.56747	-0.07928	-1.1517	-0.35688	-0.75644	-0.44642	-0.73614	-0.6602	-0.70647	-0.50493
0.169521	-0.27888	-0.69172	-0.18667	-1.27078	-0.71229	-0.57232	-0.11707	-1.13437	-0.33601	-0.74292	-0.44924	-0.80112	-0.69808	-0.73257	-0.52048
0.171154	-0.26128	-0.70797	-0.1923	-1.2866	-0.75838	-0.56671	-0.10919	-1.12663	-0.37827	-0.65405	-0.45206	-0.84773	-0.71446	-0.76235	-0.52247
0.214076	-0.25403	-0.69978	-0.21389	-1.3543	-0.78771	-0.58	-0.12823	-1.11422	-0.36237	-0.60594	-0.43786	-0.84328	-0.73734	-0.81533	-0.50616
0.325311	-0.18951	-0.72805	-0.27536	-1.42865	-0.84586	-0.5802	-0.13113	-1.13093	-0.35479	-0.66402	-0.45404	-0.85815	-0.72409	-0.86085	-0.51709
0.397628	-0.07714	-0.72411	-0.3162	-1.4316	-0.86788	-0.58891	-0.08954	-1.10675	-0.32372	-0.64319	-0.4673	-0.84377	-0.71945	-0.91615	-0.52921
0.484674	0.048645	-0.71696	-0.36948	-1.42809	-0.92331	-0.62071	-0.08699	-1.08185	-0.33345	-0.66086	-0.52779	-0.89682	-0.73653	-0.94645	-0.57891
0.534043	0.187897	-0.65358	-0.37943	-1.37472	-0.93024	-0.66639	-0.09147	-1.03685	-0.34839	-0.56057	-0.5426	-0.90929	-0.76985	-0.95883	-0.58532
0.596065	0.228208	-0.60704	-0.38174	-1.39984	-0.94816	-0.69983	-0.12968	-1.02906	-0.3381	-0.6094	-0.59186	-0.89588	-0.79884	-1.02119	-0.59139
0.670578	0.274286	-0.57512	-0.3938	-1.42154	-0.96866	-0.70626	-0.18139	-1.05233	-0.35162	-0.61738	-0.58601	-0.87915	-0.80029	-1.08398	-0.59089
0.760957	0.248159	-0.59301	-0.41038	-1.40306	-0.95926	-0.70072	-0.2095	-1.06699	-0.36381	-0.55752	-0.63307	-0.87131	-0.80934	-1.14108	-0.60931
0.892333	0.287799	-0.56545	-0.42511	-1.37973	-0.99461	-0.70131	-0.2314	-1.07123	-0.38416	-0.55221	-0.61215	-0.90447	-0.83867	-1.15788	-0.64892
0.972823	0.337263	-0.56438	-0.43986	-1.33666	-0.9808	-0.70261	-0.20582	-1.07221	-0.42048	-0.53124	-0.65951	-0.94649	-0.86969	-1.15241	-0.67171
1.00269	0.385804	-0.48591	-0.45682	-1.31993	-0.98175	-0.67594	-0.1972	-1.04705	-0.43407	-0.64267	-0.65936	-0.91539	-0.89235	-1.17068	-0.68948
0.966191	0.395688	-0.43338	-0.45681	-1.23868	-0.95332	-0.64818	-0.19871	-1.00841	-0.4671	-0.67325	-0.68714	-0.88515	-0.89463	-1.1769	-0.71599
0.945918	0.362919	-0.39056	-0.43516	-1.14812	-0.92868	-0.59274	-0.20969	-0.99595	-0.46099	-0.68008	-0.68455	-0.82071	-0.89629	-1.15582	-0.73254
0.93017	0.354531	-0.43169	-0.42921	-1.04426	-0.93365	-0.5646	-0.23957	-1.01111	-0.50116	-0.65947	-0.71434	-0.83572	-0.91112	-1.17523	-0.75835
0.953882	0.348633	-0.46733	-0.41743	-0.92849	-0.94514	-0.53789	-0.23885	-1.01213	-0.50525	-0.61992	-0.70505	-0.85788	-0.92247	-1.17913	-0.77058
0.954985	0.389725	-0.49583	-0.40918	-0.87735	-0.9883	-0.52671	-0.26975	-0.98021	-0.55231	-0.68129	-0.67869	-0.87259	-0.92494	-1.24458	-0.79423
0.96204	0.406703	-0.516	-0.40988	-0.81809	-1.05176	-0.51959	-0.28508	-0.96952	-0.57018	-0.70282	-0.64912	-0.89558	-0.92697	-1.24273	-0.81618
0.96067	0.367575	-0.5016	-0.44768	-0.80748	-1.06574	-0.51496	-0.32673	-0.95925	-0.61034	-0.71758	-0.62093	-0.8964	-0.93853	-1.23801	-0.84584
0.989106	0.333458	-0.46387	-0.51912	-0.75597	-1.08626	-0.50749	-0.3038	-0.93548	-0.59439	-0.72618	-0.61529	-0.92711	-0.94247	-1.20718	-0.88387
1.07217	0.317226	-0.4507	-0.60017	-0.72181	-1.09057	-0.50637	-0.29568	-0.90405	-0.65283	-0.73108	-0.61045	-0.96273	-0.94793	-1.20226	-0.9075
1.15799	0.323406	-0.4122	-0.67381	-0.6358	-1.0819	-0.50841	-0.27386	-0.86416	-0.6788	-0.70018	-0.6527	-0.98158	-0.95408	-1.17129	-0.91364
1.20867	0.310892	-0.38618	-0.73932	-0.53031	-1.01536	-0.52416	-0.28311	-0.84518	-0.70509	-0.66955	-0.69832	-1.0287	-0.98559	-1.13408	-0.91439
1.19924	0.315406	-0.29723	-0.74134	-0.38601	-0.88352	-0.51701	-0.26284	-0.82664	-0.6635	-0.61595	-0.70504	-1.09324	-0.99868	-1.09433	-0.93771
1.17827	0.314456	-0.25615	-0.7382	-0.26615	-0.74235	-0.47965	-0.20967	-0.79827	-0.65441	-0.64477	-0.63935	-1.15193	-1.01783	-1.12977	-0.97835
1.19034	0.344917	-0.22777	-0.67666	-0.18986	-0.60109	-0.45325	-0.19751	-0.76751	-0.69292	-0.77192	-0.57893	-1.18381	-1.02193	-1.14429	-1.01451
1.20629	0.312539	-0.18238	-0.65059	-0.20501	-0.55424	-0.42405	-0.14299	-0.75292	-0.74783	-0.89337	-0.54472	-1.21083	-1.01634	-1.15001	-1.0329
1.23002	0.269097	-0.15971	-0.63334	-0.26528	-0.56014	-0.41659	-0.15511	-0.72407	-0.78849	-0.96434	-0.54411	-1.19049	-0.99209	-1.17818	-1.03984
1.21805	0.181383	-0.14073	-0.68111	-0.34646	-0.64728	-0.39607	-0.16227	-0.69191	-0.81103	-0.91683	-0.50938	-1.2092	-0.97833	-1.18695	-1.0514
1.19735	0.165597	-0.17074	-0.71556	-0.40876	-0.65863	-0.38343	-0.20076	-0.64842	-0.82391	-1.00966	-0.45925	-1.18991	-0.96934	-1.22025	-1.06276
1.1856	0.157908	-0.1389	-0.71877	-0.45921	-0.6879	-0.35779	-0.19998	-0.60737	-0.8124	-1.04512	-0.43472	-1.22551	-0.9602	-1.16925	-1.06596
1.13971	0.18243	-0.0848	-0.70053	-0.44585	-0.67765	-0.33454	-0.14151	-0.54534	-0.79597	-1.04065	-0.41104	-1.20731	-0.95367	-1.13943	-1.05692
1.12812	0.170711	-0.04445	-0.70374	-0.43388	-0.75702	-0.33102	-0.12293	-0.5214	-0.78988	-0.97326	-0.40696	-1.25287	-0.97063	-1.08478	-1.06591
1.0975	0.160965	-0.02335	-0.6926	-0.43185	-0.85833	-0.33214	-0.12162	-0.5173	-0.83177	-0.92942	-0.36898	-1.26484	-1.00069	-1.07935	-1.09029
1.11538	0.129052	-0.02483	-0.66311	-0.39208	-0.92367	-0.32496	-0.13153	-0.51057	-0.87083	-0.97907	-0.38496	-1.29424	-1.00328	-1.09857	-1.10478
1.07477	0.084801	0.008677	-0.64384	-0.33518	-0.9606	-0.3191	-0.12528	-0.5109	-0.88238	-0.92414	-0.37143	-1.2822	-1.00688	-1.13417	-1.11335
1.0715	0.088757	0.03048	-0.67566	-0.22178	-0.86869	-0.33234	-0.12442	-0.52007	-0.89689	-0.89762	-0.42324	-1.32339	-1.00086	-1.11403	-1.09912
1.02378	0.102889	0.081135	-0.70982	-0.16708	-0.82251	-0.34175	-0.11221	-0.52194	-0.88792	-0.86406	-0.40125	-1.3105	-1.01472	-1.09906	-1.11464
0.980067	0.109706	0.110319	-0.74928	-0.14426	-0.75535	-0.34831	-0.1119	-0.51128	-0.92541	-0.93594	-0.39769	-1.28108	-1.02707	-1.04804	-1.10947
0.882896	0.102456	0.095187	-0.77051	-0.1844	-0.75841	-0.34663	-0.11631	-0.4931	-0.91867	-0.98971	-0.37434	-1.29019	-1.04959	-1.04501	-1.13028
0.786049	0.079413	0.13498	-0.77958	-0.17086	-0.65235	-0.35712	-0.13368	-0.49324	-0.94338	-0.99134	-0.35766	-1.25335	-1.08136	-1.03737	-1.143
0.720455	0.095359	0.143053	-0.78261	-0.13687	-0.48928	-0.36789	-0.14353	-0.48806	-0.93223	-1.03132	-0.36026	-1.23602	-1.10638	-1.05805	-1.16631
0.654817	0.044814	0.179055	-0.77591	-0.0662	-0.40436	-0.36486	-0.15303	-0.48683	-0.92646	-1.07538	-0.33305	-1.15691	-1.12316	-1.04135	-1.19127
0.615561	0.02506	0.155952	-0.77257	-0.08197	-0.37215	-0.3653	-0.17525	-0.50795	-0.89769	-1.00978	-0.37116	-1.22079	-1.13245	-0.99352	-1.19591
0.556733	-0.01466	0.118896	-0.76471	-0.11568	-0.41131	-0.35565	-0.18057	-0.49658	-0.8729	-0.93415	-0.37844	-1.24719	-1.13204	-0.9372	-1.21718
0.515808	0.007599	0.043416	-0.77286	-0.13299	-0.38633	-0.39184	-0.18944	-0.48266	-0.89069	-0.9005	-0.44148	-1.29089	-1.12773	-0.92893	-1.21989
0.490166	0.008209	-0.05055	-0.79322	-0.12921	-0.3922	-0.42277	-0.19062	-0.48915	-0.91753	-0.90672	-0.48664	-1.26202	-1.11573	-0.95679	-1.23614
0.489271	0.037103	-0.05465	-0.79422	-0.08455	-0.43371	-0.45756	-0.17221	-0.4645	-0.90608	-0.89658	-0.56412	-1.19753	-1.10069	-0.97818	-1.24953
0.490944	0.071789	0.046457	-0.8115	-0.10824	-0.50339	-0.46241	-0.16166	-0.45527	-0.85978	-0.80461	-0.59782	-1.14719	-1.0987	-0.95521	-1.25175
0.506025	0.064557	0.08163	-0.84849	-0.14304	-0.54726	-0.46069	-0.15147	-0.41828	-0.83131	-0.78196	-0.64828	-1.15306	-1.0958	-0.93945	-1.26898
0.504805	0.022997	0.122831	-0.92186	-0.15736	-0.5348	-0.46302	-0.16024	-0.38014	-0.83177	-0.65625	-0.7088	-1.21107	-1.10977	-0.9099	-1.28874
0.556739	-0.00804	0.06127	-0.95044	-0.15178	-0.53796	-0.43748	-0.14039	-0.3632	-0.843	-0.59925	-0.74988	-1.22077	-1.11488	-0.95336	-1.3466
0.551269	-0.02175	0.106853	-0.97357	-0.12561	-0.52791	-0.41652	-0.11324	-0.32662	-0.84459	-0.50742	-0.73569	-1.1767	-1.13211	-0.98818	-1.38783
0.538717	-0.02052	0.125687	-0.9716	-0.15979	-0.53029	-0.39207	-0.08158	-0.33114	-0.87149	-0.56511	-0.7097	-1.10532	-1.13085	-1.06051	-1.42719
0.467209	-0.02491	0.166853	-0.98885	-0.14933	-0.4727	-0.40459	-0.04175	-0.26453	-0.86324	-0.64909	-0.70299	-1.10433	-1.12181	-1.07985	-1.4504
0.421505	-0.02021	0.07263	-0.98569	-0.13688	-0.44039	-0.41135	-0.06324	-0.21615	-0.90437	-0.80009	-0.72783	-1.17698	-1.10272	-1.11555	-1.47723
0.383192	-0.0055	0.006359	-0.96539	-0.1127	-0.3374	-0.41903	-0.07434	-0.13427	-0.8898	-0.90675	-0.73927	-1.28692	-1.09068	-1.12844	-1.47105
0.335633	-0.03122	-0.08636	-0.95428	-0.09872	-0.29044	-0.40671	-0.13751	-0.08923	-0.92626	-0.95078	-0.73783	-1.32661	-1.0874	-1.16115	-1.42975
0.333126	-0.04354	-0.0658	-0.94025	-0.07459	-0.20223	-0.40604	-0.13535	-0.0592	-0.91797	-1.00256	-0.71604	-1.31065	-1.0899	-1.20513	-1.39649
0.350507	-0.05939	-0.05813	-0.96099	-0.03723	-0.18729	-0.40015	-0.13471	-0.02344	-0.90908	-1.02309	-0.73219	-1.26201	-1.07604	-1.2555	-1.37909
0.350098	-0.06462	-0.0195	-0.96852	0.015654	-0.16748	-0.39632	-0.12002	0.002887	-0.86601	-1.00378	-0.73982	-1.29105	-1.06486	-1.27601	-1.3814
0.313429	-0.05749	-0.02075	-0.99044	-0.03424	-0.21357	-0.38458	-0.13166	0.030046	-0.83302	-0.88168	-0.7736	-1.32163	-1.06107	-1.28966	-1.37056
0.234595	-0.05249	-0.03601	-1.00316	-0.1107	-0.19385	-0.3681	-0.15179	-0.00328	-0.81915	-0.79011	-0.77566	-1.35351	-1.08404	-1.25416	-1.33525
0.128097	-0.04243	-0.04301	-1.02657	-0.21027	-0.15757	-0.35846	-0.15921	-0.06923	-0.85083	-0.79622	-0.7776	-1.34701	-1.10409	-1.24902	-1.33641
0.02071	-0.07249	-0.03174	-1.05406	-0.20028	-0.05502	-0.34997	-0.17093	-0.11428	-0.86755	-0.81377	-0.793	-1.33546	-1.13321	-1.19615	-1.33594
-0.05348	-0.07634	-0.03602	-1.08173	-0.20351	-0.0259	-0.35696	-0.18219	-0.16116	-0.90835	-0.88407	-0.81013	-1.32916	-1.14289	-1.2306	-1.37428
-0.07732	-0.07557	-0.0173	-1.05938	-0.24159	0.02275	-0.37831	-0.20603	-0.15426	-0.91982	-0.84943	-0.83438	-1.31891	-1.1481	-1.21562	-1.36442
-0.09248	-0.0569	-0.00571	-1.03562	-0.29064	-0.04164	-0.40384	-0.20477	-0.14068	-0.919	-0.87975	-0.81979	-1.336	-1.13773	-1.22967	-1.38923
-0.08758	-0.05181	-0.00561	-1.03467	-0.31897	-0.15433	-0.43621	-0.22527	-0.1083	-0.89577	-0.75598	-0.8135	-1.35784	-1.13808	-1.21022	-1.38685
-0.09732	-0.06721	-0.02031	-1.04243	-0.30975	-0.32753	-0.45777	-0.2422	-0.10121	-0.87622	-0.7016	-0.82657	-1.38759	-1.15199	-1.26684	-1.44265
-0.07702	-0.04074	-0.03358	-1.03395	-0.29084	-0.41891	-0.48754	-0.27163	-0.09419	-0.84513	-0.63036	-0.87936	-1.38319	-1.15785	-1.28288	-1.45165
-0.09867	-0.06968	-0.04917	-1.01297	-0.29886	-0.38694	-0.4952	-0.2909	-0.12123	-0.85239	-0.68414	-0.92533	-1.3764	-1.1712	-1.29366	-1.48858
-0.10227	-0.07554	-0.09614	-1.01664	-0.28107	-0.32093	-0.52089	-0.32236	-0.16165	-0.87926	-0.71237	-1.00247	-1.39972	-1.18163	-1.30973	-1.48676
-0.1571	-0.11493	-0.09593	-1.02304	-0.32458	-0.29434	-0.51747	-0.36361	-0.20143	-0.89431	-0.7244	-1.01259	-1.40028	-1.19721	-1.35241	-1.48389
-0.18906	-0.08772	-0.11434	-0.98579	-0.31265	-0.3354	-0.56036	-0.41044	-0.20777	-0.90169	-0.68171	-1.00274	-1.43205	-1.21295	-1.35872	-1.46153
-0.24306	-0.08801	-0.08197	-0.93571	-0.36253	-0.33833	-0.57092	-0.47347	-0.20647	-0.88275	-0.69953	-1.00258	-1.40529	-1.22063	-1.30044	-1.45185
-0.24941	-0.05923	-0.07924	-0.87427	-0.3705	-0.376	-0.60301	-0.47857	-0.20322	-0.86578	-0.68242	-0.99228	-1.37798	-1.2237	-1.24552	-1.46259
-0.28067	-0.06182	-0.06705	-0.86463	-0.43741	-0.46533	-0.5932	-0.46796	-0.17208	-0.85193	-0.70293	-1.0271	-1.35351	-1.21262	-1.22009	-1.46935
-0.26594	-0.0206	-0.08796	-0.89418	-0.4418	-0.4901	-0.58365	-0.42749	-0.15762	-0.82965	-0.70489	-0.98095	-1.35306	-1.20519	-1.21761	-1.46933
-0.25244	-0.00103	-0.12049	-0.93557	-0.40477	-0.50031	-0.57375	-0.44002	-0.16821	-0.82513	-0.78706	-1.00408	-1.4033	-1.19738	-1.18492	-1.45391
-0.23229	0.01507	-0.1426	-0.9234	-0.31751	-0.47607	-0.58639	-0.47183	-0.17421	-0.82387	-0.76102	-1.03127	-1.42685	-1.20703	-1.19999	-1.45136
-0.2363	0.014138	-0.15523	-0.89313	-0.24137	-0.47183	-0.59781	-0.51851	-0.15196	-0.80488	-0.77115	-1.06952	-1.44982	-1.22432	-1.20417	-1.4786
-0.25237	0.056012	-0.15081	-0.84984	-0.22271	-0.49273	-0.61242	-0.55786	-0.11654	-0.79949	-0.71831	-1.09651	-1.40641	-1.23221	-1.22859	-1.50395
-0.25369	0.057872	-0.14113	-0.86399	-0.19671	-0.47221	-0.59444	-0.56222	-0.12733	-0.78308	-0.72434	-1.10282	-1.36686	-1.23798	-1.22939	-1.53633
-0.23923	0.064522	-0.14985	-0.91378	-0.20626	-0.5126	-0.62007	-0.54178	-0.14304	-0.80583	-0.75825	-1.16455	-1.36764	-1.24341	-1.23785	-1.51081
-0.24535	0.027146	-0.12281	-0.9576	-0.21154	-0.43941	-0.62792	-0.52954	-0.15263	-0.82044	-0.78237	-1.22824	-1.41798	-1.2625	-1.2662	-1.52342
-0.24391	0.019562	-0.14422	-0.97148	-0.2284	-0.33424	-0.63632	-0.53286	-0.15432	-0.81209	-0.83185	-1.23276	-1.48693	-1.26422	-1.29426	-1.5156
-0.24744	0.000567	-0.10354	-0.91874	-0.24691	-0.23195	-0.60355	-0.55786	-0.15282	-0.78196	-0.72256	-1.17547	-1.44429	-1.27083	-1.28331	-1.53233
-0.26377	-0.02506	-0.14565	-0.8745	-0.21139	-0.1862	-0.59256	-0.57151	-0.1725	-0.76159	-0.68546	-1.13538	-1.41925	-1.26407	-1.29218	-1.51688
-0.28539	-0.01721	-0.10969	-0.79795	-0.21768	-0.19058	-0.58474	-0.63471	-0.21459	-0.74065	-0.60572	-1.13046	-1.36378	-1.27305	-1.26984	-1.51435
-0.31994	-0.04265	-0.08337	-0.75775	-0.1385	-0.14116	-0.58672	-0.66261	-0.2223	-0.71567	-0.63157	-1.16512	-1.38514	-1.25905	-1.25202	-1.50665
-0.3034	-0.07159	-0.03854	-0.74096	-0.14596	-0.1626	-0.58741	-0.70072	-0.23078	-0.70277	-0.57506	-1.15621	-1.36785	-1.2593	-1.1952	-1.49294
-0.29545	-0.09297	-0.08092	-0.75821	-0.14672	-0.18966	-0.59899	-0.73354	-0.21042	-0.70415	-0.57402	-1.17727	-1.41268	-1.26223	-1.15907	-1.50844
-0.29979	-0.05392	-0.1274	-0.76263	-0.20723	-0.17774	-0.60269	-0.72745	-0.23367	-0.71789	-0.51632	-1.1841	-1.39384	-1.26371	-1.2008	-1.53364
-0.31597	0.03139	-0.1326	-0.74385	-0.28225	-0.13353	-0.599	-0.71367	-0.23124	-0.69875	-0.55107	-1.18549	-1.38154	-1.26987	-1.22778	-1.56367
-0.32747	0.063764	-0.08338	-0.72065	-0.29631	-0.21454	-0.59152	-0.66356	-0.25378	-0.72493	-0.59679	-1.1951	-1.33126	-1.26755	-1.224	-1.57388
-0.34827	0.05205	-0.07893	-0.68623	-0.39418	-0.38132	-0.61462	-0.66343	-0.25999	-0.77545	-0.64281	-1.18203	-1.28697	-1.27027	-1.18192	-1.59693
-0.35951	0.027253	-0.14439	-0.65363	-0.40965	-0.51081	-0.64248	-0.64911	-0.29549	-0.84797	-0.70577	-1.21183	-1.2575	-1.25409	-1.19187	-1.60335
-0.38414	0.034177	-0.16162	-0.60927	-0.42937	-0.46574	-0.65662	-0.67476	-0.32015	-0.86677	-0.70597	-1.20131	-1.2409	-1.25269	-1.18307	-1.60782
-0.39454	0.108751	-0.16095	-0.58381	-0.35809	-0.45078	-0.64405	-0.66864	-0.332	-0.8753	-0.72388	-1.21995	-1.23484	-1.25634	-1.15226	-1.58392
-0.45686	0.133831	-0.0865	-0.57729	-0.29981	-0.39478	-0.62431	-0.68291	-0.31827	-0.83571	-0.7113	-1.16981	-1.19434	-1.25782	-1.10989	-1.59224
-0.4752	0.148205	-0.08083	-0.5906	-0.27004	-0.48627	-0.61262	-0.65882	-0.33497	-0.79451	-0.7442	-1.15328	-1.20391	-1.24225	-1.12519	-1.61443
-0.52548	0.132469	-0.04398	-0.58294	-0.3071	-0.53735	-0.59356	-0.66178	-0.34256	-0.7293	-0.84504	-1.11656	-1.19548	-1.2294	-1.17451	-1.62469
-0.5769	0.103135	-0.02265	-0.58883	-0.39028	-0.58428	-0.57197	-0.6596	-0.34959	-0.72392	-0.83924	-1.10627	-1.20524	-1.22239	-1.21905	-1.63083
-0.63637	0.077361	0.028553	-0.57397	-0.51324	-0.46042	-0.55466	-0.64185	-0.32178	-0.73107	-0.86488	-1.10211	-1.12648	-1.22574	-1.24817	-1.60194
-0.64507	0.01611	0.005468	-0.57936	-0.61579	-0.47023	-0.54928	-0.64378	-0.33203	-0.78473	-0.78616	-1.09936	-1.11721	-1.2292	-1.2562	-1.60068
-0.64943	-0.01969	-0.02639	-0.54267	-0.64921	-0.52999	-0.53689	-0.66175	-0.3681	-0.86418	-0.77075	-1.14061	-1.13689	-1.25103	-1.25504	-1.62284
-0.64886	-0.05987	-0.02544	-0.54773	-0.64698	-0.56017	-0.51367	-0.66999	-0.36463	-0.91127	-0.69639	-1.13371	-1.12847	-1.26304	-1.26004	-1.66063
-0.65635	-0.10011	-0.03429	-0.52994	-0.59081	-0.42042	-0.49585	-0.69707	-0.39229	-0.9286	-0.61527	-1.20946	-1.16052	-1.27251	-1.27628	-1.68988
-0.66928	-0.15182	-0.03788	-0.54554	-0.57414	-0.34118	-0.47597	-0.72273	-0.37347	-0.89322	-0.58115	-1.22179	-1.15228	-1.26038	-1.36758	-1.67669
-0.6957	-0.17896	-0.09718	-0.54867	-0.62281	-0.39158	-0.45832	-0.74119	-0.36531	-0.86818	-0.56078	-1.24188	-1.21223	-1.25729	-1.42265	-1.67213
-0.69842	-0.20826	-0.15304	-0.54769	-0.75209	-0.40857	-0.44043	-0.75872	-0.38175	-0.86281	-0.56747	-1.21916	-1.19892	-1.26111	-1.46979	-1.67599
-0.66822	-0.19887	-0.12447	-0.52564	-0.85425	-0.38739	-0.41193	-0.74013	-0.40188	-0.82776	-0.57742	-1.24807	-1.13773	-1.27908	-1.44834	-1.65068
-0.66281	-0.21259	-0.10219	-0.4927	-0.90563	-0.30088	-0.39494	-0.76159	-0.46552	-0.81986	-0.52659	-1.27338	-1.09308	-1.29082	-1.4652	-1.6134
-0.69018	-0.13929	-0.05964	-0.44016	-0.89195	-0.34353	-0.36976	-0.78678	-0.47791	-0.82241	-0.54875	-1.26901	-1.08738	-1.28103	-1.44725	-1.58352
-0.68867	-0.05935	-0.07688	-0.36307	-0.89519	-0.25985	-0.37056	-0.8327	-0.51337	-0.88548	-0.56606	-1.19019	-1.11148	-1.28159	-1.40825	-1.61261
-0.67769	0.002943	-0.03395	-0.27199	-0.83483	-0.19806	-0.38178	-0.86221	-0.53467	-0.92213	-0.63295	-1.13227	-1.0658	-1.27896	-1.3624	-1.6356
-0.63152	0.021777	0.009822	-0.19875	-0.86109	-0.06791	-0.39414	-0.86553	-0.54549	-0.91862	-0.6602	-1.09915	-0.91686	-1.29198	-1.37687	-1.65392
-0.6285	-0.02751	-0.01144	-0.14242	-0.83333	0.087762	-0.41883	-0.87933	-0.57323	-0.88596	-0.576	-1.10032	-0.86029	-1.28059	-1.41044	-1.64734
-0.61573	-0.07749	-0.026	-0.10261	-0.85366	0.169633	-0.46898	-0.90765	-0.61742	-0.85533	-0.6028	-1.1121	-0.83745	-1.2708	-1.42819	-1.61882
-0.6064	-0.13086	-0.0465	-0.08391	-0.75813	0.077312	-0.49208	-0.91502	-0.66619	-0.8199	-0.6274	-1.11769	-0.86629	-1.25391	-1.43467	-1.56807
-0.5672	-0.12938	-0.0755	-0.0441	-0.66854	-0.11293	-0.49413	-0.93252	-0.73493	-0.81955	-0.67732	-1.14535	-0.80546	-1.25688	-1.45933	-1.52101
-0.50967	-0.09006	-0.1535	0.053403	-0.55094	-0.18816	-0.45846	-0.98831	-0.78057	-0.9083	-0.57277	-1.12595	-0.67674	-1.28561	-1.47688	-1.52407
-0.49614	-0.07311	-0.14806	0.154369	-0.52439	-0.18767	-0.45484	-1.03525	-0.80466	-0.94999	-0.47455	-1.07919	-0.5976	-1.30698	-1.46646	-1.5408
-0.51043	-0.08419	-0.16761	0.245646	-0.56777	-0.13359	-0.47994	-1.11301	-0.81005	-1.01648	-0.52632	-1.01221	-0.57567	-1.33926	-1.43961	-1.57238
-0.53635	-0.07326	-0.16294	0.286782	-0.63937	-0.11143	-0.48012	-1.1108	-0.81846	-0.9826	-0.6509	-0.96705	-0.55136	-1.30569	-1.44439	-1.56865
-0.55706	-0.10378	-0.23389	0.332881	-0.64163	-0.03767	-0.52155	-1.15534	-0.8387	-0.99863	-0.79332	-0.92977	-0.54105	-1.27653	-1.45179	-1.55174
-0.59391	-0.11733	-0.24588	0.364973	-0.56372	-0.09466	-0.51314	-1.12726	-0.87008	-0.9815	-0.84362	-0.90195	-0.47927	-1.22407	-1.47802	-1.55057
-0.62395	-0.18546	-0.27681	0.355292	-0.47771	-0.14437	-0.54419	-1.12025	-0.89157	-0.94319	-0.89475	-0.91217	-0.51542	-1.20195	-1.51604	-1.54347
-0.59133	-0.18486	-0.27103	0.37598	-0.44049	-0.11486	-0.50812	-1.11113	-0.91773	-0.92607	-0.9249	-0.91443	-0.50097	-1.19181	-1.54292	-1.54893
-0.52612	-0.20362	-0.28167	0.364782	-0.42307	-0.01853	-0.474	-1.09244	-0.91642	-0.85376	-1.00301	-0.92781	-0.51511	-1.16471	-1.51883	-1.53108
-0.48818	-0.18387	-0.24637	0.369844	-0.40556	0.012485	-0.43745	-1.09074	-0.91639	-0.8533	-0.98684	-0.93124	-0.50927	-1.1258	-1.47318	-1.5014
-0.4466	-0.16409	-0.20087	0.336338	-0.34177	-0.01105	-0.43766	-1.04053	-0.89722	-0.77237	-1.06092	-0.93266	-0.52837	-1.09024	-1.39172	-1.47165
-0.42726	-0.09886	-0.1645	0.341399	-0.26962	-0.00158	-0.45823	-1.04546	-0.89355	-0.76352	-1.05241	-0.92325	-0.57546	-1.06595	-1.3588	-1.45742
-0.41082	-0.05675	-0.12556	0.362547	-0.2363	0.102614	-0.4896	-1.03088	-0.86086	-0.70064	-1.18528	-0.89099	-0.6027	-1.08164	-1.2904	-1.45418
-0.42925	-0.024	-0.09766	0.399009	-0.26555	0.161022	-0.48059	-1.02107	-0.87265	-0.72163	-1.24724	-0.85905	-0.58011	-1.08233	-1.29449	-1.44606
-0.44189	-0.00788	-0.02522	0.425737	-0.3347	0.137656	-0.48008	-0.98947	-0.85508	-0.71315	-1.20081	-0.81434	-0.53757	-1.09498	-1.21703	-1.43461
-0.46405	0.018548	-0.02488	0.426722	-0.27381	0.06789	-0.46743	-0.99189	-0.84361	-0.7482	-1.12952	-0.76936	-0.51858	-1.06331	-1.19706	-1.41219
-0.46922	-0.03235	-0.0421	0.413615	-0.13122	0.059993	-0.50444	-1.01542	-0.80458	-0.71884	-0.9757	-0.73981	-0.56195	-1.04365	-1.14584	-1.38063
-0.46315	-0.07759	-0.05938	0.359018	0.027602	0.023794	-0.53691	-0.99863	-0.7725	-0.66743	-1.00923	-0.76387	-0.61065	-0.98788	-1.12175	-1.34237
-0.44699	-0.09926	-0.07263	0.343585	0.090008	0.068497	-0.57012	-0.95009	-0.75838	-0.57833	-1.00313	-0.78685	-0.68419	-0.9624	-1.15182	-1.32104
-0.46026	-0.08616	-0.07774	0.299854	0.123519	0.120121	-0.57152	-0.89088	-0.72432	-0.50753	-1.01365	-0.79026	-0.73363	-0.93703	-1.14383	-1.34081
-0.44738	-0.09173	-0.04096	0.32766	0.144663	0.22085	-0.54487	-0.87774	-0.71784	-0.46043	-0.89673	-0.78126	-0.7276	-0.95971	-1.14886	-1.31367
-0.43979	-0.12092	0.021532	0.38207	0.202858	0.230072	-0.50917	-0.91122	-0.71329	-0.43811	-0.80332	-0.75878	-0.69756	-0.97081	-1.09885	-1.30557
-0.38663	-0.10231	0.063493	0.441036	0.199245	0.142915	-0.45513	-0.93999	-0.74654	-0.43994	-0.7655	-0.75652	-0.66181	-0.97281	-1.09764	-1.2565
-0.39058	-0.10625	0.088303	0.466255	0.171679	0.073074	-0.42725	-0.94349	-0.7607	-0.43974	-0.80285	-0.74039	-0.65769	-0.95893	-1.10067	-1.25371
-0.40506	-0.13136	0.081571	0.466686	0.142255	0.057061	-0.37338	-0.92488	-0.77332	-0.4365	-0.81513	-0.72359	-0.62999	-0.94276	-1.10757	-1.23382
-0.43804	-0.13665	0.135167	0.498015	0.186491	0.093433	-0.33353	-0.91185	-0.78514	-0.40208	-0.83785	-0.65244	-0.56881	-0.94204	-1.13899	-1.21919
-0.4463	-0.1322	0.041144	0.499103	0.269267	0.158333	-0.25972	-0.86104	-0.76937	-0.3965	-0.82488	-0.58742	-0.51997	-0.91918	-1.22962	-1.21614
-0.40348	-0.14192	0.024414	0.555979	0.283933	0.126933	-0.25114	-0.8838	-0.79402	-0.40175	-0.77231	-0.54533	-0.52613	-0.92695	-1.22164	-1.21177
-0.42439	-0.20167	0.01652	0.585782	0.315664	0.171793	-0.23682	-0.89249	-0.77983	-0.40772	-0.71921	-0.55367	-0.58788	-0.91814	-1.2391	-1.20581
-0.45403	-0.24921	0.101924	0.641235	0.340017	0.198449	-0.28363	-1.00695	-0.82107	-0.37979	-0.7112	-0.57255	-0.70039	-0.95747	-1.16181	-1.19339
-0.50468	-0.22323	0.14504	0.627737	0.349492	0.228317	-0.28634	-0.9976	-0.82749	-0.32499	-0.80224	-0.59161	-0.72475	-0.93904	-1.17988	-1.15837
-0.58648	-0.23573	0.141309	0.616274	0.352506	0.223382	-0.29237	-1.01233	-0.81558	-0.26487	-0.82816	-0.62866	-0.72871	-0.92083	-1.13701	-1.15016
-0.62253	-0.18463	0.122538	0.59286	0.317564	0.133981	-0.26277	-0.946	-0.81183	-0.23946	-0.81848	-0.67243	-0.68183	-0.86584	-1.15697	-1.13246
-0.64275	-0.14293	0.162534	0.60722	0.375543	0.101704	-0.23542	-0.92014	-0.80528	-0.21596	-0.80965	-0.69101	-0.70251	-0.86834	-1.12048	-1.1539
-0.60616	-0.06587	0.223967	0.624254	0.382331	0.079566	-0.22252	-0.91935	-0.76791	-0.22873	-0.78564	-0.65672	-0.73157	-0.86194	-1.08977	-1.14355
-0.60936	-0.05305	0.315581	0.643004	0.441256	0.110709	-0.21567	-0.93245	-0.70593	-0.15941	-0.87578	-0.59518	-0.75879	-0.88132	-1.03692	-1.11394
-0.64144	-0.07153	0.341314	0.625451	0.480786	0.204746	-0.20155	-0.94094	-0.67892	-0.13937	-0.75538	-0.54488	-0.76814	-0.89186	-1.03068	-1.10832
-0.6863	-0.10497	0.373175	0.649198	0.556914	0.211784	-0.17939	-0.9149	-0.71316	-0.14615	-0.79501	-0.55041	-0.75328	-0.90548	-1.033	-1.08531
-0.7027	-0.14312	0.406618	0.656914	0.562526	0.22198	-0.14988	-0.89626	-0.72042	-0.14684	-0.62743	-0.5186	-0.71716	-0.90472	-1.02336	-1.06802
-0.71104	-0.17477	0.427873	0.681119	0.593611	0.17749	-0.16571	-0.87673	-0.68854	-0.13128	-0.58133	-0.5253	-0.68442	-0.88667	-0.96699	-1.02227
-0.67077	-0.17206	0.428838	0.672584	0.730367	0.13702	-0.17672	-0.85657	-0.69209	-0.08757	-0.33167	-0.50513	-0.6661	-0.86802	-0.91103	-1.02197
-0.67722	-0.15541	0.432315	0.674072	0.912777	0.094784	-0.1879	-0.83442	-0.69629	-0.0557	-0.13229	-0.50062	-0.64524	-0.84415	-0.93119	-1.02688
-0.64454	-0.15823	0.480502	0.650929	1.08513	0.032267	-0.15664	-0.83672	-0.6756	-0.01269	0.010925	-0.47222	-0.6207	-0.81841	-0.92574	-1.01367
-0.63517	-0.14829	0.463983	0.60657	1.13622	0.050642	-0.14116	-0.88326	-0.65123	0.029823	0.037419	-0.50922	-0.64371	-0.79947	-0.92679	-0.97348
-0.61727	-0.15703	0.498144	0.559775	1.15908	0.107658	-0.1043	-0.88448	-0.61565	0.057776	0.008247	-0.54296	-0.67769	-0.76446	-0.89079	-0.94204
-0.63488	-0.14076	0.515495	0.531908	1.14872	0.14621	-0.05801	-0.85934	-0.62123	0.07988	-0.03255	-0.5581	-0.7286	-0.75483	-0.89501	-0.91432
-0.66581	-0.16386	0.631876	0.522128	1.09566	0.162772	0.008765	-0.77817	-0.59333	0.118677	-0.07027	-0.51718	-0.72167	-0.75412	-0.89779	-0.90532
-0.6767	-0.18182	0.648109	0.552271	1.01055	0.12822	0.045836	-0.7644	-0.56588	0.138062	-0.03898	-0.47695	-0.72682	-0.78185	-0.90181	-0.90733
-0.6789	-0.18953	0.660791	0.567126	0.991445	0.116625	0.088545	-0.76873	-0.56342	0.167552	0.075828	-0.47507	-0.73441	-0.79372	-0.89978	-0.91457
-0.66948	-0.20353	0.601069	0.569904	1.03093	0.135692	0.107998	-0.78495	-0.59017	0.193189	0.091617	-0.47467	-0.77478	-0.79605	-0.90882	-0.90978
-0.62957	-0.15497	0.560787	0.559197	1.16899	0.210377	0.119039	-0.78276	-0.59717	0.209909	0.023634	-0.51387	-0.82527	-0.78622	-0.90652	-0.89955
-0.62717	-0.15129	0.526111	0.53155	1.21385	0.294961	0.115607	-0.76834	-0.57658	0.234333	0.023761	-0.50344	-0.83185	-0.78099	-0.91452	-0.91184
-0.5976	-0.09789	0.517974	0.510326	1.19814	0.347366	0.141647	-0.73837	-0.5155	0.250646	0.080338	-0.48122	-0.82594	-0.77245	-0.8909	-0.89902
-0.61448	-0.08837	0.567121	0.458689	1.1457	0.401173	0.167635	-0.71851	-0.47893	0.266224	0.104366	-0.42414	-0.78494	-0.76647	-0.87576	-0.88579
-0.58614	-0.073	0.598014	0.45017	1.12617	0.375173	0.185986	-0.69447	-0.4576	0.266744	0.042194	-0.42902	-0.76436	-0.74903	-0.84161	-0.83225
-0.60174	-0.03193	0.660842	0.473722	1.107	0.326244	0.177039	-0.71155	-0.45847	0.283203	0.08626	-0.43063	-0.73148	-0.72767	-0.78433	-0.82805

## Sheet: Hotplate Cluster 2 control
0.0902939	0.0925529	0.211386	-0.341175	0.353719	0.180858	0.0180157	0.144308	0.907016	0.399665	0.484104	0.0463802	0.162105	1.06298	0.792874	0.68859
0.0741983	0.108791	0.162071	-0.333802	0.342672	0.149501	0.0310314	0.15554	0.831047	0.34829	0.577982	-0.0289404	0.0896329	1.05608	0.767221	0.689835
0.0287628	0.0692285	0.212623	-0.34579	0.379097	0.10404	0.0276524	0.181275	0.814083	0.349202	0.606004	-0.022945	0.119344	1.07452	0.791029	0.717568
0.011353	0.0611397	0.192772	-0.353489	0.365786	0.0082875	-0.0120746	0.165127	0.758713	0.33679	0.555396	0.0370918	0.17609	1.07598	0.799445	0.661788
-0.0022434	0.0916819	0.200718	-0.337519	0.350358	-0.0061477	-0.0136931	0.154586	0.709892	0.309717	0.474459	0.133132	0.249459	1.04431	0.789505	0.663354
0.003125	0.130995	0.173431	-0.3373	0.299192	0.0430894	-0.0229203	0.169324	0.710698	0.275865	0.410584	0.115706	0.280403	1.02096	0.800409	0.640543
-0.0174954	0.123593	0.104924	-0.382534	0.265327	0.145743	-0.014287	0.182255	0.652991	0.199908	0.427835	0.0588658	0.267089	0.991171	0.774654	0.682323
-0.0331164	0.083126	0.0598334	-0.421668	0.252066	0.19442	-0.0203481	0.222329	0.701761	0.188734	0.430736	0.0913294	0.264739	1.00237	0.797393	0.691745
-0.0608759	0.0294524	0.0108045	-0.454099	0.280448	0.23044	-0.043265	0.19488	0.673687	0.141076	0.409624	0.0926806	0.252722	1.01604	0.764213	0.726974
-0.0721033	0.00407906	0.0827263	-0.460879	0.321902	0.19693	-0.0381358	0.210423	0.73434	0.193926	0.38587	0.165203	0.268738	1.03687	0.815433	0.735566
-0.0944568	0.0214303	0.0773131	-0.470948	0.334465	0.19383	-0.0447936	0.234025	0.68332	0.208417	0.424898	0.120781	0.276948	1.05637	0.811427	0.741791
-0.109515	0.0323455	0.0464993	-0.492814	0.285253	0.168554	-0.0453208	0.247055	0.652718	0.18883	0.442577	0.141481	0.274068	1.06704	0.834463	0.747375
-0.122718	0.019987	-0.0393226	-0.488357	0.221736	0.201631	-0.058881	0.277512	0.629629	0.128795	0.499434	0.071899	0.300616	1.0883	0.809784	0.737097
-0.120037	0.0023751	-0.093323	-0.492566	0.20209	0.206591	-0.075979	0.238392	0.606401	0.0780192	0.463852	0.0549724	0.254915	1.0865	0.838549	0.73441
-0.107386	-0.00638966	-0.0991853	-0.491108	0.208279	0.179329	-0.0789832	0.221612	0.626658	0.0847371	0.423847	0.0625262	0.264452	1.08626	0.848908	0.710228
-0.0929151	-0.0129496	-0.0825502	-0.532071	0.146229	0.16963	-0.063856	0.195095	0.646005	0.101714	0.371861	0.0779547	0.23565	1.09693	0.837955	0.718545
-0.104409	-0.0275136	-0.0422395	-0.53195	0.100995	0.199546	-0.0666578	0.228113	0.657006	0.129242	0.349744	0.0610795	0.23564	1.10528	0.83353	0.724087
-0.14605	-0.0713484	-0.0700176	-0.512439	0.0801623	0.221115	-0.0691914	0.248541	0.621144	0.140757	0.274114	0.0909506	0.255084	1.09744	0.831125	0.699477
-0.173127	-0.086664	-0.105553	-0.477176	0.0860333	0.213283	-0.091417	0.242879	0.566494	0.136225	0.296955	0.153633	0.241142	1.06785	0.799077	0.684008
-0.131917	-0.115964	-0.183928	-0.492197	0.0738835	0.165806	-0.111552	0.222819	0.516616	0.129844	0.319136	0.187673	0.26077	1.065	0.757308	0.662447
-0.0539476	-0.127166	-0.164557	-0.526182	0.0702925	0.196858	-0.123449	0.263578	0.519824	0.119364	0.298731	0.186092	0.174864	1.07247	0.708049	0.692069
0.0334429	-0.139975	-0.132823	-0.507281	0.134943	0.206504	-0.127145	0.28249	0.503692	0.172166	0.348234	0.205326	0.212072	1.09819	0.732435	0.725372
0.0637089	-0.148959	-0.0777273	-0.470235	0.184238	0.226463	-0.098958	0.319803	0.502627	0.196	0.360827	0.230076	0.255238	1.10962	0.704701	0.758194
0.09288	-0.114702	-0.0592456	-0.411178	0.20449	0.212274	-0.120426	0.293436	0.481235	0.228703	0.397721	0.257328	0.326628	1.10221	0.77153	0.734001
0.0850721	-0.110706	-0.0704916	-0.372801	0.222394	0.194723	-0.148781	0.247316	0.395442	0.163205	0.287474	0.271885	0.331488	1.07036	0.79833	0.716737
0.0329956	-0.146043	-0.115626	-0.351841	0.246205	0.191713	-0.179243	0.178379	0.350673	0.10566	0.215342	0.309479	0.339242	1.0687	0.819756	0.685988
0.0387098	-0.160691	-0.153319	-0.319128	0.317472	0.197891	-0.15973	0.172001	0.307991	0.107153	0.284625	0.362579	0.385858	1.06805	0.816233	0.686054
0.0792139	-0.13273	-0.197565	-0.313627	0.33093	0.17911	-0.161473	0.172872	0.337417	0.0923148	0.33667	0.381038	0.341487	1.08495	0.810345	0.647638
0.160888	-0.10016	-0.203551	-0.301817	0.373273	0.133657	-0.154881	0.197955	0.363402	0.138507	0.298789	0.391953	0.36905	1.07481	0.845896	0.65727
0.165897	-0.121442	-0.293678	-0.306987	0.351084	0.142191	-0.185769	0.183592	0.346324	0.093517	0.183591	0.293862	0.331696	1.0975	0.783644	0.659942
0.162362	-0.152392	-0.289139	-0.335938	0.363816	0.0827239	-0.199364	0.213136	0.378424	0.124197	0.110399	0.293866	0.316245	1.09317	0.77753	0.667212
0.140792	-0.159348	-0.284951	-0.364086	0.344924	0.0721557	-0.208095	0.23325	0.400706	0.0792073	0.145381	0.273321	0.220144	1.0836	0.716069	0.671924
0.176015	-0.169992	-0.216809	-0.384244	0.342407	-0.00144557	-0.19568	0.258707	0.421853	0.0978438	0.185953	0.355818	0.204046	1.06156	0.720855	0.708941
0.172093	-0.15507	-0.195738	-0.370848	0.277736	0.0345454	-0.179847	0.255381	0.418785	0.0571506	0.231312	0.391753	0.244759	1.04878	0.691988	0.720402
0.227992	-0.102395	-0.201308	-0.331664	0.263953	0.0400907	-0.190225	0.246711	0.399408	0.0495799	0.275155	0.477274	0.301975	1.06204	0.653277	0.759479
0.232416	-0.0675435	-0.205399	-0.313014	0.26079	0.0519847	-0.169423	0.243238	0.426945	0.0153966	0.226	0.512031	0.307875	1.0646	0.599105	0.737931
0.258309	-0.0636437	-0.248799	-0.321717	0.291552	0.0342608	-0.154279	0.269918	0.365747	0.0226387	0.205873	0.500351	0.235893	1.06355	0.573354	0.740474
0.246733	-0.103726	-0.182824	-0.374914	0.266108	0.0852974	-0.105682	0.313069	0.363159	0.0962515	0.189404	0.498866	0.178733	1.03463	0.616523	0.693881
0.22064	-0.109654	-0.101844	-0.427266	0.215924	0.104534	-0.0728755	0.396591	0.3739	0.155367	0.310765	0.505614	0.15159	1.01243	0.638985	0.717668
0.188851	-0.131053	-0.0317411	-0.45367	0.213794	0.156833	-0.0447487	0.404979	0.436253	0.192086	0.392948	0.520568	0.195699	0.99444	0.657388	0.7352
0.156622	-0.110896	-0.0575567	-0.421721	0.20277	0.141237	-0.0352964	0.392312	0.408756	0.16838	0.36533	0.454749	0.2123	0.980499	0.6735	0.765697
0.140133	-0.0947564	-0.0942204	-0.397673	0.228834	0.189678	-0.0246945	0.328266	0.325809	0.137551	0.288414	0.458854	0.196967	0.962408	0.70576	0.737025
0.133106	-0.0720847	-0.144819	-0.399542	0.214968	0.131128	0.018525	0.35033	0.279469	0.0863614	0.208183	0.477675	0.169736	0.961327	0.680351	0.727706
0.173836	-0.0618922	-0.104092	-0.415596	0.234191	0.171229	0.0739706	0.366768	0.302757	0.0826613	0.232573	0.555613	0.202743	0.953822	0.6799	0.693378
0.168037	-0.0674666	-0.143756	-0.38026	0.17822	0.198631	0.139737	0.428516	0.287429	0.090743	0.28375	0.575195	0.227185	0.928303	0.630937	0.675642
0.124096	-0.130715	-0.114126	-0.347176	0.165722	0.291239	0.225275	0.424957	0.276739	0.123594	0.354805	0.583244	0.238099	0.914353	0.569396	0.677877
0.0271977	-0.172399	-0.170197	-0.352238	0.108707	0.33177	0.277443	0.442831	0.213992	0.115262	0.30253	0.622417	0.150875	0.89553	0.453501	0.678495
-0.0211358	-0.184427	-0.181078	-0.417345	0.0716522	0.262834	0.347584	0.438408	0.206661	0.0778212	0.22623	0.734509	0.106629	0.869759	0.395429	0.720444
-0.0323925	-0.154784	-0.233939	-0.428077	0.0212833	0.239142	0.373304	0.511535	0.177627	0.0348138	0.0459716	0.89014	0.0824697	0.844904	0.373312	0.739129
-0.0674375	-0.154487	-0.245409	-0.446574	0.0294372	0.12525	0.423933	0.606167	0.185155	0.00881478	0.0148625	1.06058	0.117399	0.836249	0.337106	0.767611
-0.086931	-0.220333	-0.273509	-0.44004	0.0628436	0.0136829	0.418959	0.681616	0.12661	-0.0371692	0.0120558	1.11938	0.0713101	0.815253	0.215138	0.747338
-0.150207	-0.314578	-0.250911	-0.436737	0.0478196	-0.0680568	0.421092	0.71435	0.0669281	-0.0460956	0.0197381	1.21273	0.0990614	0.790471	0.172686	0.715805
-0.200814	-0.374342	-0.321457	-0.415257	0.0253649	-0.0415837	0.370615	0.694016	-0.0131584	-0.12506	-0.00750931	1.21102	-0.00317352	0.732993	0.191227	0.675724
-0.224015	-0.325376	-0.305619	-0.387743	0.0130843	0.00941234	0.346754	0.685218	-0.0411015	-0.150854	-0.0724183	1.26882	0.0607966	0.726235	0.276075	0.675571
-0.166954	-0.296946	-0.296442	-0.347845	0.0372806	0.0482259	0.330831	0.688661	-0.0834587	-0.144261	-0.0898085	1.40715	0.10731	0.701938	0.295389	0.632635
-0.0788788	-0.280344	-0.256348	-0.227658	0.0307149	0.0370818	0.358974	0.70944	-0.170357	-0.120316	-0.118643	1.67812	0.346386	0.702399	0.280515	0.635912
-0.00137453	-0.314174	-0.263501	-0.0822829	0.0124891	0.0222156	0.388718	0.717947	-0.233021	-0.118504	-0.295552	1.90974	0.455569	0.6805	0.257565	0.585614
0.0215674	-0.317792	-0.265358	0.0246532	-0.0645494	0.0720621	0.4114	0.716784	-0.322729	-0.176581	-0.447406	2.00018	0.566734	0.661742	0.249991	0.594342
0.0497648	-0.349764	-0.244016	0.0803748	-0.136695	0.0563435	0.42066	0.738103	-0.325868	-0.216368	-0.501839	1.96087	0.566269	0.643078	0.277404	0.573871
0.0283283	-0.415263	-0.217085	0.091678	-0.182245	0.127012	0.420911	0.728631	-0.369255	-0.260078	-0.496711	1.9796	0.549176	0.621188	0.343647	0.534672
0.0102075	-0.426587	-0.146069	0.0773065	-0.144996	-0.00317893	0.381574	0.717596	-0.388586	-0.233524	-0.533744	1.91046	0.505204	0.624219	0.393287	0.54171
0.0195407	-0.437718	-0.0826553	0.079644	-0.109651	-0.0491461	0.337219	0.657341	-0.460909	-0.228988	-0.656748	1.86856	0.472689	0.625808	0.403305	0.514668
0.0542336	-0.441192	-0.0366649	0.115581	-0.111253	-0.140909	0.280816	0.655414	-0.505372	-0.191323	-0.710185	1.82483	0.504419	0.634076	0.395461	0.552086
0.086045	-0.472791	-0.0724086	0.200517	-0.121054	-0.172708	0.249859	0.625537	-0.506777	-0.241011	-0.703121	1.79618	0.532897	0.619767	0.377576	0.54755
0.110558	-0.511618	-0.0810033	0.236678	-0.182204	-0.191947	0.212351	0.633558	-0.46491	-0.264383	-0.66173	1.74292	0.598411	0.606914	0.345966	0.559481
0.156778	-0.496717	-0.07987	0.246624	-0.227021	-0.223697	0.175423	0.561976	-0.447901	-0.324084	-0.59158	1.59696	0.589709	0.595571	0.318892	0.509234
0.210726	-0.512025	-0.0707181	0.254631	-0.332464	-0.204404	0.149376	0.500225	-0.463777	-0.382249	-0.513051	1.51453	0.516403	0.5617	0.310696	0.438098
0.273431	-0.50517	-0.0275559	0.307261	-0.40115	-0.318576	0.122864	0.424822	-0.497157	-0.405581	-0.535047	1.47047	0.492109	0.52003	0.330555	0.38478
0.299622	-0.541003	0.00971967	0.417142	-0.44699	-0.330206	0.111607	0.448094	-0.515012	-0.387867	-0.612691	1.46092	0.576296	0.493103	0.314866	0.354222
0.338976	-0.563327	0.0274607	0.540209	-0.479663	-0.341605	0.0551832	0.420747	-0.574572	-0.373987	-0.720077	1.45517	0.673025	0.471323	0.279637	0.336288
0.282901	-0.623028	0.064412	0.614747	-0.511171	-0.253291	0.0114763	0.449043	-0.618017	-0.38162	-0.755514	1.39437	0.74958	0.462396	0.250557	0.328285
0.234676	-0.694688	0.00706602	0.676715	-0.541911	-0.236706	-0.0550438	0.348544	-0.716434	-0.462306	-0.754575	1.33517	0.727487	0.416683	0.230057	0.265674
0.156132	-0.752773	-0.0813766	0.729208	-0.485082	-0.195819	-0.100501	0.281702	-0.816808	-0.526219	-0.823389	1.27677	0.749377	0.370546	0.198254	0.193011
0.111328	-0.778983	-0.238487	0.827611	-0.41237	-0.225838	-0.142364	0.145407	-0.900931	-0.652933	-0.914634	1.25246	0.804966	0.32949	0.144025	0.0962002
0.108476	-0.800367	-0.280678	0.924153	-0.427697	-0.167615	-0.190453	0.0555549	-0.952743	-0.70387	-1.0504	1.25643	0.940581	0.303411	0.110662	0.0617287
0.0800184	-0.869495	-0.323161	1.02886	-0.573672	-0.0520248	-0.202904	-0.0230262	-0.975965	-0.798696	-1.16383	1.23985	1.04119	0.261208	0.0402555	-0.0131574
-0.00541976	-0.935443	-0.429718	1.14048	-0.76934	0.175835	-0.22347	-0.165311	-1.07962	-0.937297	-1.22365	1.24858	1.05759	0.170353	0.00903216	-0.104127
-0.183524	-1.02008	-0.583161	1.24134	-0.975403	0.217126	-0.240573	-0.277763	-1.13614	-1.11209	-1.26758	1.23891	1.05802	0.0730505	-0.0538139	-0.199019
-0.29434	-1.03673	-0.727664	1.31053	-1.15567	0.168301	-0.276263	-0.340124	-1.18795	-1.22683	-1.23629	1.22989	1.06885	0.00164471	-0.0623059	-0.215384
-0.342861	-1.11376	-0.821548	1.37069	-1.24144	0.0862164	-0.284066	-0.372934	-1.213	-1.31726	-1.25865	1.17102	1.16946	-0.0387277	-0.0813209	-0.280491
-0.388372	-1.14385	-0.861515	1.45149	-1.23634	0.0496349	-0.265235	-0.391976	-1.27206	-1.35276	-1.26454	1.15481	1.24642	-0.0652145	-0.0922162	-0.335211
-0.473664	-1.24003	-0.899	1.53379	-1.24128	0.0322758	-0.2824	-0.418398	-1.3259	-1.38015	-1.31617	1.11405	1.28862	-0.08942	-0.137348	-0.431787
-0.519272	-1.26364	-0.91491	1.57924	-1.29263	0.106972	-0.327706	-0.435105	-1.4049	-1.38161	-1.41058	1.06677	1.21234	-0.0964171	-0.210832	-0.453472
-0.503832	-1.3286	-0.974462	1.55476	-1.32735	0.134813	-0.415348	-0.459588	-1.45038	-1.42305	-1.49048	0.927086	1.17056	-0.108535	-0.222227	-0.482727
-0.446345	-1.29556	-0.977982	1.50149	-1.34485	0.0045219	-0.468871	-0.464572	-1.42476	-1.4752	-1.59205	0.837474	1.19716	-0.114181	-0.161305	-0.50466
-0.42735	-1.29072	-1.00685	1.44366	-1.34034	-0.160682	-0.568669	-0.468793	-1.3558	-1.456	-1.63958	0.823965	1.18646	-0.119503	-0.134608	-0.526944
-0.381334	-1.24657	-1.01474	1.37743	-1.35825	-0.206216	-0.658065	-0.442897	-1.32278	-1.42445	-1.7412	0.813266	1.1196	-0.112447	-0.140446	-0.516336
-0.327967	-1.25169	-1.02367	1.33623	-1.2736	-0.139056	-0.743333	-0.453904	-1.35853	-1.42326	-1.84568	0.764753	1.02737	-0.112775	-0.177261	-0.535072
-0.248545	-1.23871	-0.981007	1.2822	-1.22068	-0.170003	-0.794282	-0.421713	-1.38896	-1.42883	-1.90753	0.699716	1.00048	-0.117181	-0.114398	-0.571788
-0.158762	-1.21844	-0.914333	1.23437	-1.09518	-0.289926	-0.827765	-0.40073	-1.35854	-1.37523	-1.89549	0.641621	0.996738	-0.0988368	-0.0864174	-0.617465
-0.112054	-1.19076	-0.874066	1.18397	-1.03681	-0.428443	-0.89169	-0.363375	-1.3191	-1.30391	-1.82971	0.628216	0.965995	-0.100258	-0.042313	-0.614095
-0.0726508	-1.14954	-0.901605	1.13195	-0.884512	-0.500809	-0.954086	-0.328101	-1.29745	-1.25823	-1.83493	0.526919	0.934607	-0.0973448	-0.0508334	-0.595562
-0.0186855	-1.14165	-0.973892	1.07691	-0.806134	-0.53449	-1.02094	-0.295593	-1.31235	-1.28899	-1.75523	0.493738	0.843888	-0.138371	-0.0107327	-0.604685
0.0945687	-1.0843	-1.00076	0.952657	-0.695595	-0.509178	-1.08174	-0.277439	-1.34391	-1.29802	-1.70494	0.342842	0.731096	-0.17709	0.0361762	-0.62725
0.229125	-1.0403	-1.0259	0.833738	-0.609555	-0.479546	-1.13438	-0.295857	-1.3687	-1.30284	-1.61325	0.218953	0.58241	-0.223286	0.0879268	-0.654657
0.305002	-0.983176	-0.969481	0.695493	-0.509499	-0.402723	-1.15903	-0.257188	-1.36938	-1.23099	-1.63446	0.113904	0.490853	-0.247378	0.137214	-0.658141
0.322193	-0.948892	-0.973771	0.613327	-0.450062	-0.345983	-1.17603	-0.218981	-1.35341	-1.1694	-1.6171	0.105604	0.473041	-0.248045	0.169346	-0.651721
0.316702	-0.965398	-0.920898	0.523368	-0.389157	-0.281611	-1.17603	-0.190341	-1.37386	-1.09452	-1.59368	0.114967	0.456931	-0.261062	0.195916	-0.67568
0.312588	-0.997378	-0.89323	0.454365	-0.394667	-0.239982	-1.17787	-0.201947	-1.38574	-1.01403	-1.4879	0.0677412	0.420524	-0.281942	0.192799	-0.67362
0.289001	-1.02647	-0.886247	0.357637	-0.438975	-0.202675	-1.15869	-0.214207	-1.38673	-0.944468	-1.45088	0.0368576	0.374668	-0.305154	0.216723	-0.657407
0.272057	-0.951946	-0.863199	0.270747	-0.572354	-0.20688	-1.12565	-0.184387	-1.3657	-0.872347	-1.38314	0.0594556	0.333865	-0.317292	0.236144	-0.620765
0.214904	-0.884587	-0.878829	0.201424	-0.689831	-0.225175	-1.09175	-0.180906	-1.36044	-0.835802	-1.43324	0.130349	0.266835	-0.329173	0.245115	-0.595854
0.185896	-0.850906	-0.807049	0.178591	-0.81163	-0.276065	-1.01336	-0.16764	-1.34999	-0.780302	-1.39046	0.196305	0.20337	-0.335918	0.237048	-0.597312
0.110938	-0.880993	-0.784612	0.174758	-0.910111	-0.286261	-0.920516	-0.165261	-1.34631	-0.748292	-1.33267	0.290879	0.200091	-0.339664	0.174539	-0.580661
0.084422	-0.891949	-0.731031	0.207684	-0.956762	-0.322896	-0.812	-0.158029	-1.36811	-0.739284	-1.23642	0.351598	0.170123	-0.358014	0.183709	-0.582086
0.0255702	-0.901032	-0.7372	0.222588	-0.943693	-0.331116	-0.720925	-0.15482	-1.38996	-0.683801	-1.15931	0.414709	0.123766	-0.360582	0.0859317	-0.577834
0.0164964	-0.886217	-0.730888	0.25474	-0.895932	-0.394392	-0.627323	-0.159517	-1.4068	-0.608881	-1.1611	0.417627	0.036669	-0.381709	0.0794217	-0.595281
-0.0252718	-0.840056	-0.695685	0.236002	-0.832289	-0.364063	-0.541359	-0.14077	-1.38429	-0.510643	-1.07379	0.427869	0.00805694	-0.386161	0.018238	-0.574627
-0.00476267	-0.812337	-0.659043	0.264161	-0.837827	-0.350176	-0.481886	-0.117663	-1.35432	-0.486217	-1.03469	0.386998	-0.0352339	-0.38914	0.0160673	-0.579507
-0.0163799	-0.830663	-0.611633	0.247677	-0.846245	-0.300952	-0.455305	-0.103997	-1.29229	-0.445182	-1.03866	0.339326	-0.0815334	-0.380814	-0.0158275	-0.557379
-0.0111017	-0.863287	-0.587164	0.253747	-0.890092	-0.330962	-0.425888	-0.10572	-1.25928	-0.437019	-0.984256	0.262992	-0.124992	-0.373875	-0.046574	-0.554932
-0.0123466	-0.865097	-0.536217	0.241504	-0.873485	-0.31888	-0.393925	-0.163643	-1.23917	-0.420003	-0.950794	0.256595	-0.154975	-0.374836	-0.0570891	-0.519844
0.0160096	-0.808792	-0.49056	0.255293	-0.901741	-0.413952	-0.355874	-0.178817	-1.18676	-0.388103	-0.826299	0.263163	-0.172506	-0.388238	-0.0707472	-0.50255
0.0682917	-0.768381	-0.432271	0.266636	-0.899499	-0.437791	-0.342949	-0.216783	-1.1418	-0.338137	-0.797671	0.313359	-0.158304	-0.396715	-0.0777076	-0.476363
0.128609	-0.729788	-0.420905	0.261951	-0.91233	-0.423204	-0.341957	-0.175412	-1.10041	-0.281881	-0.681533	0.334433	-0.193516	-0.433065	-0.0749904	-0.451611
0.144439	-0.711206	-0.40432	0.277035	-0.887194	-0.34083	-0.377278	-0.18807	-1.10454	-0.263202	-0.577104	0.404067	-0.250185	-0.457784	-0.0934911	-0.423143
0.147211	-0.670057	-0.448998	0.256168	-0.891795	-0.295072	-0.401154	-0.173734	-1.08505	-0.265126	-0.511107	0.378064	-0.278327	-0.482276	-0.150454	-0.425188
0.139182	-0.591613	-0.426771	0.243561	-0.882497	-0.295426	-0.412608	-0.200952	-1.07744	-0.24102	-0.502842	0.352202	-0.322947	-0.50462	-0.180536	-0.429949
0.178824	-0.546623	-0.367602	0.220023	-0.871447	-0.164142	-0.391153	-0.184033	-1.02538	-0.184095	-0.535054	0.294828	-0.277799	-0.507637	-0.162492	-0.451894
0.242637	-0.514556	-0.327098	0.226447	-0.857254	-0.135874	-0.407778	-0.199046	-1.00473	-0.141825	-0.627854	0.294034	-0.332689	-0.515042	-0.0889747	-0.439909
0.331615	-0.567538	-0.326525	0.219445	-0.848796	-0.102216	-0.418435	-0.183177	-0.950075	-0.104732	-0.599836	0.32788	-0.263294	-0.509056	-0.0596561	-0.416447
0.417409	-0.558276	-0.344021	0.224495	-0.846834	-0.139264	-0.432316	-0.188835	-0.916356	-0.127134	-0.547053	0.342342	-0.264987	-0.540208	-0.0712187	-0.394083
0.479329	-0.521474	-0.286535	0.248276	-0.819984	-0.058757	-0.410064	-0.165251	-0.860946	-0.122445	-0.399985	0.387736	-0.254985	-0.583017	-0.080356	-0.418809
0.528866	-0.439056	-0.267079	0.271917	-0.811577	0.00805896	-0.417392	-0.224468	-0.814328	-0.14743	-0.390794	0.405255	-0.300064	-0.627159	-0.0534671	-0.446839
0.532077	-0.433261	-0.24386	0.242621	-0.833572	-0.0370583	-0.406367	-0.236012	-0.776363	-0.0960557	-0.447549	0.387143	-0.347387	-0.623416	-0.0316371	-0.434769
0.570221	-0.408582	-0.222508	0.193629	-0.870819	-0.0311663	-0.425388	-0.268466	-0.7755	-0.055255	-0.550075	0.386124	-0.362188	-0.609525	-0.0578177	-0.407172
0.601679	-0.387835	-0.186905	0.154882	-0.906762	-0.0723824	-0.401731	-0.239129	-0.767485	-0.0291768	-0.562277	0.322953	-0.390801	-0.60391	-0.13968	-0.418232
0.687108	-0.347582	-0.149179	0.142043	-0.915583	-0.0752358	-0.403542	-0.231189	-0.720456	-0.0503344	-0.438733	0.308665	-0.393326	-0.623617	-0.158912	-0.41507
0.712866	-0.347695	-0.133776	0.131935	-0.929136	-0.130261	-0.397366	-0.216703	-0.675084	-0.0579684	-0.328269	0.238027	-0.403463	-0.638897	-0.16146	-0.413126
0.723219	-0.362187	-0.117429	0.103162	-0.937422	-0.112838	-0.410828	-0.233836	-0.624724	-0.0219487	-0.195313	0.201093	-0.403771	-0.65015	-0.122274	-0.398108
0.698664	-0.350887	-0.0938248	0.0615432	-0.908931	-0.0276388	-0.420181	-0.23627	-0.599995	0.0161911	-0.20555	0.197494	-0.390613	-0.649295	-0.123294	-0.409427
0.719033	-0.342337	-0.131311	0.0405071	-0.895479	0.0386672	-0.400227	-0.232142	-0.517122	0.0245165	-0.21484	0.194836	-0.417585	-0.663895	-0.125143	-0.420623
0.764486	-0.290181	-0.062643	0.0290008	-0.845697	0.0950421	-0.389824	-0.194248	-0.475793	0.034323	-0.362425	0.24458	-0.434812	-0.660012	-0.122195	-0.42184
0.764657	-0.287968	-0.0707021	0.0196373	-0.834034	0.109366	-0.392296	-0.21019	-0.473859	0.0456655	-0.325134	0.229217	-0.476436	-0.660144	-0.121928	-0.42077
0.770267	-0.279166	0.0332569	0.00200366	-0.822178	0.216465	-0.404475	-0.200826	-0.450844	0.0697881	-0.347429	0.248113	-0.420476	-0.641654	-0.121812	-0.405645
0.706674	-0.319748	0.00424797	-0.0106772	-0.799546	0.325004	-0.410286	-0.220396	-0.451689	0.0536748	-0.31968	0.215602	-0.404493	-0.642979	-0.14214	-0.405207
0.705129	-0.265294	0.0506054	-0.012792	-0.78503	0.389661	-0.396993	-0.20547	-0.429215	0.0398106	-0.376238	0.21696	-0.404398	-0.647344	-0.109642	-0.41044
0.644609	-0.279818	0.0654604	-0.0119186	-0.7687	0.402764	-0.396835	-0.206882	-0.407535	0.0436274	-0.276107	0.22994	-0.418791	-0.652112	-0.0834608	-0.43111
0.616589	-0.270904	0.131937	0.00094759	-0.761445	0.363413	-0.396201	-0.202649	-0.372658	0.0751452	-0.241886	0.22654	-0.416377	-0.665985	-0.0419187	-0.432697
0.564468	-0.316658	0.156207	-0.00218552	-0.754459	0.352951	-0.400759	-0.17284	-0.345338	0.0915244	-0.206665	0.200685	-0.380402	-0.682978	-0.092446	-0.421681
0.558065	-0.280232	0.137001	-0.00311795	-0.752076	0.316322	-0.378996	-0.196568	-0.379454	0.115746	-0.256827	0.165889	-0.391217	-0.696992	-0.163982	-0.448021
0.528346	-0.300222	0.12915	-0.0127794	-0.738908	0.32078	-0.380548	-0.179064	-0.39439	0.131498	-0.235524	0.186776	-0.410075	-0.718064	-0.212873	-0.465234
0.531863	-0.234453	0.120008	0.00116293	-0.694793	0.347578	-0.384756	-0.202754	-0.401685	0.129801	-0.197194	0.156477	-0.459487	-0.742485	-0.193388	-0.48708
0.506221	-0.252642	0.139355	0.00063123	-0.680618	0.406519	-0.387499	-0.207326	-0.380733	0.129189	-0.126474	0.15714	-0.440929	-0.765571	-0.133576	-0.470766
0.501049	-0.238607	0.170182	0.0125712	-0.687207	0.447304	-0.391894	-0.241237	-0.347404	0.102753	-0.0464848	0.117682	-0.407362	-0.775669	-0.0734922	-0.462623
0.513944	-0.290281	0.198328	0.00450102	-0.680057	0.456437	-0.419036	-0.289664	-0.333941	0.0833677	-0.0978724	0.145946	-0.388189	-0.776252	-0.0510311	-0.483724
0.524577	-0.292872	0.221243	-0.00485795	-0.634588	0.39738	-0.424028	-0.273021	-0.303374	0.0774157	-0.0740407	0.168847	-0.346809	-0.781422	-0.0348583	-0.477627
0.552554	-0.252983	0.280701	-0.0410549	-0.630318	0.345574	-0.393258	-0.260723	-0.306142	0.113512	-0.0842047	0.218517	-0.299434	-0.770332	-0.0446587	-0.414263
0.507391	-0.256169	0.305222	-0.0584867	-0.646499	0.341549	-0.3448	-0.237235	-0.270017	0.125091	-0.0101412	0.24321	-0.217972	-0.753101	-0.0287936	-0.369736
0.477178	-0.268372	0.329618	-0.0820992	-0.680205	0.375803	-0.313587	-0.236498	-0.247695	0.119625	-0.0293143	0.223251	-0.260342	-0.751527	-0.0411105	-0.381101
0.394853	-0.337174	0.304027	-0.0716933	-0.668527	0.420775	-0.320743	-0.215889	-0.218842	0.131817	-0.0325489	0.222283	-0.264746	-0.745893	-0.0546317	-0.415444
0.426215	-0.299434	0.314691	-0.0760402	-0.667011	0.427145	-0.318761	-0.194737	-0.175489	0.168563	-0.074384	0.191286	-0.283685	-0.760775	-0.0490861	-0.424713
0.490257	-0.259952	0.275321	-0.076318	-0.641875	0.438615	-0.325424	-0.17969	-0.174853	0.216592	-0.0686381	0.205306	-0.216886	-0.769077	-0.108238	-0.426872
0.576482	-0.182549	0.278875	-0.104411	-0.641725	0.412282	-0.324935	-0.218377	-0.143974	0.236256	-0.112715	0.189674	-0.152085	-0.798255	-0.123713	-0.439701
0.584913	-0.215387	0.299857	-0.109056	-0.63095	0.397255	-0.316873	-0.247232	-0.182309	0.253331	-0.0946137	0.2141	-0.164773	-0.816138	-0.155997	-0.444391
0.574697	-0.230469	0.364354	-0.0938599	-0.641821	0.396541	-0.333178	-0.307852	-0.175337	0.237754	-0.142209	0.216017	-0.186667	-0.819582	-0.102271	-0.403181
0.532398	-0.241316	0.399745	-0.0721945	-0.589422	0.493863	-0.320814	-0.308862	-0.164216	0.220316	-0.0838904	0.169427	-0.252408	-0.824664	-0.145509	-0.391162
0.487456	-0.205005	0.365267	-0.0635674	-0.581042	0.529679	-0.293804	-0.310771	-0.117072	0.196818	-0.00556196	0.147064	-0.256246	-0.831978	-0.162756	-0.38514
0.426098	-0.169552	0.388002	-0.0485115	-0.550048	0.472924	-0.301459	-0.288458	-0.0571435	0.247294	0.14004	0.122887	-0.212471	-0.849872	-0.142427	-0.387406
0.385823	-0.171935	0.285571	-0.0477243	-0.560845	0.422982	-0.300171	-0.335882	-0.127557	0.234555	0.164639	0.106686	-0.257822	-0.882594	-0.0970697	-0.403951
0.35807	-0.175679	0.339657	-0.0426506	-0.53544	0.421875	-0.298604	-0.340107	-0.140748	0.311044	0.0869176	0.101258	-0.211468	-0.881806	-0.071633	-0.394848
0.347944	-0.175721	0.317815	-0.020871	-0.520602	0.412919	-0.261538	-0.382703	-0.207291	0.291891	0.0492391	0.0581957	-0.276766	-0.881058	-0.109063	-0.419994
0.350405	-0.151911	0.399262	0.0027855	-0.510334	0.335086	-0.233082	-0.371255	-0.161622	0.330711	0.00938401	0.0703572	-0.253177	-0.838941	-0.0723406	-0.414052
0.358759	-0.110128	0.347051	0.0465667	-0.494592	0.241946	-0.241322	-0.407799	-0.196249	0.300833	0.017019	0.0192123	-0.258544	-0.837683	-0.0716119	-0.406563
0.355086	-0.0973057	0.344057	0.0731384	-0.457098	0.2475	-0.223374	-0.391874	-0.209597	0.318769	-0.0270014	0.00657851	-0.206974	-0.833459	-0.0519312	-0.376108
0.354398	-0.106528	0.317597	0.0753931	-0.416265	0.265819	-0.219341	-0.369706	-0.209832	0.321255	-0.00672166	0.00116937	-0.145325	-0.827943	-0.114673	-0.385112
0.353122	-0.124353	0.341902	0.0831663	-0.367218	0.322004	-0.211435	-0.398228	-0.202979	0.341863	-0.0347415	-0.00312332	-0.162357	-0.820816	-0.111523	-0.402566
0.336516	-0.130358	0.318552	0.0481137	-0.355335	0.356173	-0.200153	-0.428441	-0.213149	0.30321	-0.0905114	-0.0139861	-0.228173	-0.827333	-0.0879092	-0.406454
0.330609	-0.107643	0.349011	0.0575553	-0.301377	0.33478	-0.18078	-0.439388	-0.190074	0.344078	-0.0383633	-0.0205548	-0.234056	-0.842794	-0.0488454	-0.39448
0.310357	-0.0893704	0.357202	0.0591565	-0.274225	0.28397	-0.173445	-0.414023	-0.171315	0.329498	0.0194575	0.0212269	-0.222787	-0.833058	-0.0664114	-0.396437
0.284767	-0.081905	0.390716	0.0807001	-0.22513	0.223432	-0.183193	-0.390949	-0.144636	0.384935	0.105557	0.0291676	-0.128732	-0.80686	-0.0721621	-0.376594
0.283768	-0.0652877	0.418782	0.0847143	-0.201939	0.283927	-0.181289	-0.396562	-0.144913	0.374753	0.0443106	0.00971396	-0.0507064	-0.782092	-0.0903102	-0.363362
0.24717	-0.103886	0.456659	0.0463572	-0.171918	0.363909	-0.168971	-0.377993	-0.161938	0.396266	0.0613837	-0.0183364	-0.0211539	-0.800615	-0.0861667	-0.350252
0.239855	-0.103034	0.464723	0.0111264	-0.130269	0.432484	-0.186241	-0.365992	-0.138723	0.382221	-0.00524439	-0.0157911	-0.0749813	-0.815373	-0.12589	-0.382204
0.230442	-0.0973449	0.420686	-0.00744531	-0.13358	0.371024	-0.228995	-0.38693	-0.140815	0.352156	0.0115558	-0.0362144	-0.158314	-0.831183	-0.101823	-0.389219
0.25516	-0.0584844	0.363512	-0.0205297	-0.11882	0.323275	-0.282279	-0.416887	-0.115344	0.331143	0.0141981	-0.0439194	-0.189298	-0.81655	-0.0982933	-0.391516
0.271738	-0.0451531	0.341943	-0.0374313	-0.134337	0.315785	-0.272973	-0.436752	-0.100537	0.324868	0.0278221	-0.0867076	-0.133019	-0.807459	-0.0738604	-0.371103
0.251262	-0.0597599	0.388812	-0.0457934	-0.107218	0.334699	-0.251933	-0.40873	-0.0667138	0.353462	0.0403922	-0.0537512	-0.0991465	-0.795114	-0.0539288	-0.384328
0.251445	-0.0457143	0.423299	-0.0738988	-0.135379	0.340715	-0.192514	-0.367872	-0.0151377	0.400756	-0.0302777	-0.0508812	-0.0300715	-0.778136	-0.0406868	-0.350515
0.224402	-0.054448	0.39801	-0.0862806	-0.138914	0.337678	-0.147712	-0.341352	0.0530981	0.402619	0.019111	-0.0271803	-0.0373224	-0.764318	-0.0233934	-0.352675
0.21036	-0.0716713	0.427219	-0.1178	-0.15876	0.347657	-0.128694	-0.355068	0.0839279	0.428844	-0.0296416	-0.0290075	-0.0352027	-0.754253	-0.0345755	-0.317001
0.187768	-0.0994585	0.372276	-0.118597	-0.126154	0.321916	-0.121763	-0.385684	0.0702407	0.366812	-0.0398076	-0.038029	-0.03857	-0.760972	-0.064244	-0.345998
0.18199	-0.110587	0.369001	-0.153394	-0.126683	0.324682	-0.129901	-0.40963	0.0433512	0.357308	-0.133927	-0.0693777	-0.0616064	-0.750725	-0.106074	-0.350923
0.200001	-0.114183	0.338324	-0.165529	-0.119615	0.324561	-0.0969576	-0.412468	0.0165509	0.329631	-0.10989	-0.0797337	-0.0414518	-0.753262	-0.132229	-0.357528
0.204978	-0.130189	0.397943	-0.159265	-0.10188	0.269288	-0.0536006	-0.375498	0.0498006	0.380169	-0.0154936	-0.081419	-0.0377086	-0.744949	-0.13099	-0.318519
0.199015	-0.113972	0.4441	-0.145046	-0.0790159	0.218872	-0.0211526	-0.37677	0.0459558	0.390965	0.00706374	-0.0634788	-0.00982247	-0.760826	-0.116928	-0.309546
0.179622	-0.10619	0.424756	-0.134888	-0.0756756	0.220371	-0.0127384	-0.366791	0.083466	0.383796	-0.02957	-0.0981594	-0.0571305	-0.757719	-0.159526	-0.328223
0.156506	-0.0980194	0.369214	-0.12388	-0.120834	0.304864	-0.0200355	-0.398813	0.0189814	0.3195	0.00387924	-0.0825399	-0.0707839	-0.761403	-0.195775	-0.384188
0.163586	-0.0800826	0.360695	-0.105781	-0.11387	0.345493	-0.0152617	-0.390525	0.0158015	0.317102	0.135424	-0.0863158	-0.0708175	-0.76006	-0.189252	-0.395686
0.150556	-0.0585284	0.383714	-0.126372	-0.100841	0.335924	-0.0137466	-0.392571	-0.0278865	0.274814	0.213919	-0.0480685	-0.050365	-0.75898	-0.143731	-0.362574
0.177459	-0.023956	0.443104	-0.144859	-0.0813897	0.326552	0.0102653	-0.379064	0.0232861	0.318731	0.184826	-0.0562115	-0.0282595	-0.740131	-0.143516	-0.323378
0.146002	-0.0305679	0.476392	-0.148374	-0.0946923	0.283165	0.0279409	-0.396735	-0.0157602	0.329889	0.126314	0.0062873	0.0291843	-0.718587	-0.138228	-0.300302
0.155759	-0.0327806	0.411632	-0.132947	-0.11617	0.270623	0.024194	-0.356422	-0.0223069	0.391269	0.0472551	-0.00204408	0.0449587	-0.693168	-0.147286	-0.286317
0.129143	-0.0175228	0.419492	-0.125072	-0.131742	0.224038	0.0113046	-0.366706	-0.046931	0.399615	-0.0963599	0.0193287	0.0548551	-0.731759	-0.136297	-0.327967
0.146573	0.0167831	0.357358	-0.121676	-0.17452	0.229058	-0.00640422	-0.342407	-0.0384369	0.406588	-0.162204	-0.050255	-0.0113604	-0.740162	-0.164216	-0.367198
0.15932	0.0488097	0.373918	-0.129727	-0.20542	0.209796	0.00539304	-0.374777	-0.0284275	0.370661	-0.108836	-0.0702085	-0.0260514	-0.776692	-0.183824	-0.419607
0.128055	-0.0114184	0.349354	-0.131202	-0.230486	0.237696	0.0153727	-0.343445	-0.0354631	0.399619	-0.0306926	-0.127104	-0.0449086	-0.766048	-0.176499	-0.40789
0.101124	-0.0549608	0.309752	-0.125822	-0.227279	0.204783	0.0299763	-0.367555	-0.026239	0.384285	0.0339796	-0.116165	0.0167761	-0.787876	-0.258219	-0.394417
0.0270395	-0.0916965	0.27474	-0.111583	-0.211737	0.157676	0.0141221	-0.433735	-0.0668472	0.386984	0.0146362	-0.109086	0.0551358	-0.792848	-0.30733	-0.37436
0.0376443	-0.0736728	0.220182	-0.116448	-0.143681	0.115149	-0.0176414	-0.515295	-0.0789521	0.3133	0.0488834	-0.124941	0.0522282	-0.816227	-0.340184	-0.371581
0.0416203	-0.084219	0.276359	-0.152627	-0.0865853	0.117175	-0.0315846	-0.518718	-0.0827556	0.350054	0.0173244	-0.110153	0.00427153	-0.817657	-0.280011	-0.382214
0.0659991	-0.0620987	0.302731	-0.160542	-0.0372765	0.12776	-0.0105132	-0.491265	-0.0407947	0.340033	0.0447639	-0.162061	-0.0721223	-0.822844	-0.191152	-0.388353
0.06242	-0.0676273	0.303953	-0.197944	-0.0374582	0.163755	0.00046638	-0.46824	-0.0351436	0.35949	0.055893	-0.136871	-0.0939679	-0.812989	-0.161014	-0.372347
0.0319715	-0.0449706	0.292771	-0.191551	-0.035716	0.159119	-0.0152637	-0.488171	-0.0207283	0.300187	0.0458795	-0.131764	-0.158439	-0.834365	-0.132425	-0.385161
0.0125381	-0.0560117	0.27094	-0.208378	-0.00026055	0.155027	-0.027117	-0.443169	0.0128443	0.335048	0.075523	-0.0694349	-0.0800164	-0.832768	-0.193196	-0.368681
0.0122813	-0.0224322	0.307812	-0.201032	-0.0231552	0.146217	-0.00852798	-0.443833	0.0661771	0.340415	0.0878985	-0.0466613	-0.065818	-0.829158	-0.211849	-0.375504
0.0404041	-0.0453467	0.263903	-0.225378	0.00755686	0.219696	-0.00833663	-0.424571	0.0815474	0.3638	0.0825306	-0.0493012	-0.0414457	-0.820378	-0.292114	-0.337592
0.0448179	-0.0827231	0.241951	-0.265998	-0.0028674	0.293748	0.00075223	-0.429339	0.0272126	0.35764	0.00205992	-0.0724744	-0.137475	-0.825544	-0.318762	-0.349487
0.0220748	-0.115003	0.194084	-0.263721	0.017676	0.386433	-0.00496967	-0.447164	0.018044	0.379597	0.00702079	-0.135539	-0.187889	-0.833853	-0.363816	-0.332395
0.0129701	-0.14062	0.190496	-0.268027	0.0333515	0.423042	0.00538596	-0.423823	-0.0163878	0.39284	0.0818342	-0.175244	-0.207781	-0.821925	-0.352969	-0.317467
-0.0282849	-0.144187	0.179204	-0.237885	0.0247049	0.497368	-0.00734595	-0.473021	0.0150902	0.404221	0.067583	-0.16765	-0.217979	-0.832151	-0.346858	-0.317891
-0.0526322	-0.177413	0.150508	-0.234811	0.0282053	0.551675	-0.0333869	-0.435114	-0.0158954	0.427345	0.123474	-0.157696	-0.226813	-0.836261	-0.304697	-0.32905
-0.0588357	-0.140065	0.145443	-0.23519	-0.0200421	0.597081	-0.0356645	-0.466844	-0.0136325	0.394371	0.0984722	-0.152975	-0.240974	-0.857805	-0.282671	-0.365007
-0.0251412	-0.0983829	0.20092	-0.227398	-0.0495893	0.593024	-0.0313357	-0.43131	-0.0110908	0.401293	0.136689	-0.140899	-0.228488	-0.876908	-0.219085	-0.371766
0.0113285	-0.0364656	0.21568	-0.214336	-0.0733333	0.547468	-0.0350023	-0.44611	-0.00751103	0.344546	0.160976	-0.157991	-0.286259	-0.870152	-0.217634	-0.371932
-0.00027125	-0.0442982	0.191657	-0.200918	-0.105476	0.485096	-0.0655602	-0.446573	-0.0343806	0.362671	0.18664	-0.157531	-0.315634	-0.872294	-0.175472	-0.366198
0.00312175	-0.0852511	0.1467	-0.196409	-0.109495	0.468063	-0.0915942	-0.472049	-0.0509315	0.325856	0.250339	-0.166433	-0.380157	-0.843031	-0.200704	-0.371307
-0.00319649	-0.0972841	0.0994901	-0.209817	-0.119793	0.503843	-0.0849662	-0.513738	-0.100467	0.328196	0.184526	-0.145975	-0.432869	-0.85567	-0.19964	-0.359108
-0.00471342	-0.129579	0.0734767	-0.219612	-0.133013	0.513188	-0.0625838	-0.538322	-0.0773134	0.281147	0.222531	-0.158579	-0.475288	-0.858885	-0.245949	-0.337636
0.00717634	-0.109929	0.0110625	-0.250691	-0.137168	0.495435	-0.0365359	-0.552243	-0.11601	0.2601	0.312058	-0.218909	-0.438856	-0.882927	-0.280648	-0.281915
0.00967451	-0.140023	0.040416	-0.265049	-0.123389	0.45655	0.0021501	-0.519427	-0.0902073	0.259296	0.326996	-0.270972	-0.355271	-0.879235	-0.319036	-0.278838
0.0272727	-0.0995423	0.0420714	-0.281938	-0.0600232	0.487884	0.0207043	-0.521618	-0.111939	0.29271	0.298743	-0.324254	-0.335892	-0.895922	-0.308428	-0.280234
0.022538	-0.0980259	0.0669696	-0.305065	-0.00748463	0.51075	0.0321511	-0.499552	-0.0880871	0.305033	0.254158	-0.347516	-0.349179	-0.893001	-0.36289	-0.282291
0.0296717	-0.0770505	0.0518187	-0.306912	0.0506448	0.488434	0.00808574	-0.508135	-0.101059	0.298531	0.323318	-0.317552	-0.332108	-0.909779	-0.343215	-0.2796
0.0220579	-0.0801915	0.0354482	-0.335727	0.0545394	0.510327	-0.00715763	-0.458636	-0.0941301	0.299653	0.304991	-0.280141	-0.304869	-0.888462	-0.407262	-0.269915
-0.00553653	-0.102823	0.0600035	-0.314286	0.0879748	0.509824	0.00337622	-0.406102	-0.0806164	0.335236	0.272866	-0.205416	-0.243629	-0.904851	-0.39884	-0.278769
-0.0487487	-0.152463	0.0153109	-0.318203	0.11639	0.552089	0.0036093	-0.372762	-0.0597832	0.292773	0.22239	-0.224232	-0.272294	-0.913016	-0.46932	-0.273385
-0.0879693	-0.144319	0.0215333	-0.318938	0.153094	0.545076	0.0103201	-0.367148	-0.0362635	0.27408	0.150122	-0.244964	-0.276793	-0.947416	-0.430509	-0.295901
-0.096349	-0.163902	0.0203235	-0.317699	0.146409	0.564671	-0.00590616	-0.385022	-0.0106996	0.252939	0.203793	-0.287465	-0.294138	-0.939393	-0.448948	-0.338022
-0.0919955	-0.158342	0.103203	-0.353662	0.127138	0.611357	-0.00312937	-0.367869	0.0124005	0.323922	0.169694	-0.238846	-0.252403	-0.942422	-0.453334	-0.348624
-0.0885074	-0.186045	0.144341	-0.327833	0.14357	0.630724	-0.0032879	-0.384468	0.00840413	0.32361	0.197315	-0.202471	-0.256252	-0.938558	-0.467192	-0.351175
-0.0542363	-0.108525	0.14351	-0.352548	0.11633	0.587675	0.00746664	-0.373557	-0.0216295	0.289253	0.169992	-0.172145	-0.290536	-0.937481	-0.475894	-0.339978
-0.0611602	-0.103538	0.0932542	-0.340841	0.103182	0.573552	0.0242415	-0.375605	-0.0423237	0.240171	0.16676	-0.203102	-0.384921	-0.936527	-0.491448	-0.346138
-0.0596584	-0.0919257	0.0881184	-0.3487	0.120068	0.572305	0.063262	-0.355644	-0.0234392	0.269356	0.216254	-0.164435	-0.363836	-0.922465	-0.525679	-0.320979
-0.0887934	-0.119981	0.0443111	-0.367743	0.134492	0.562149	0.102783	-0.370099	-0.0314478	0.258653	0.122024	-0.170961	-0.370898	-0.931324	-0.509296	-0.319079
-0.0738513	-0.0330521	0.0259071	-0.369002	0.136439	0.534255	0.115888	-0.37436	-0.059915	0.249843	0.104806	-0.129443	-0.338519	-0.926577	-0.541097	-0.302929
-0.0397959	0.0255635	0.0598641	-0.380229	0.0663831	0.51652	0.139139	-0.378558	-0.0622554	0.2556	0.0792831	-0.149672	-0.248168	-0.900399	-0.58163	-0.270647
-0.0489743	0.0754576	0.0527062	-0.34175	0.0554009	0.592768	0.129748	-0.418406	-0.0978478	0.293527	0.157492	-0.151492	-0.198512	-0.88398	-0.585898	-0.222556
-0.0390456	0.0656264	0.0781996	-0.351504	0.0699188	0.554028	0.166185	-0.434607	-0.103684	0.330088	0.212253	-0.18416	-0.143509	-0.877432	-0.600996	-0.235417
-0.05471	0.0551666	0.0228151	-0.358328	0.0909298	0.493935	0.193402	-0.446984	-0.182513	0.323133	0.294133	-0.166044	-0.215882	-0.89472	-0.643981	-0.270899
-0.0298589	0.0653031	0.100599	-0.354099	0.0801447	0.425562	0.244847	-0.410924	-0.170806	0.345683	0.294158	-0.125553	-0.204706	-0.893203	-0.669175	-0.274789
-0.0534702	0.058261	0.140439	-0.325073	0.0383987	0.377907	0.256515	-0.401968	-0.175677	0.374144	0.262412	-0.0478012	-0.233931	-0.904165	-0.632019	-0.267587
-0.064844	0.0693065	0.175614	-0.30145	0.0123186	0.344244	0.273969	-0.378017	-0.141395	0.418726	0.1601	-0.0511052	-0.202646	-0.910997	-0.589154	-0.253456
-0.0872823	0.0806624	0.142328	-0.285569	-0.0229934	0.303469	0.269991	-0.404334	-0.152793	0.402702	0.120961	-0.057523	-0.24819	-0.929512	-0.595121	-0.266866
-0.0838935	0.0922038	0.162091	-0.298721	-0.0327028	0.25995	0.313005	-0.385269	-0.161664	0.41995	0.126665	-0.113548	-0.19366	-0.908188	-0.634796	-0.25951
-0.073211	0.0996384	0.124607	-0.308196	-0.0532172	0.204677	0.323195	-0.409011	-0.197929	0.353618	0.20573	-0.144484	-0.239225	-0.922232	-0.685292	-0.287988
-0.0790661	0.0471485	0.136713	-0.311355	-0.0592541	0.148692	0.347066	-0.394797	-0.238403	0.325668	0.281394	-0.151218	-0.170826	-0.936753	-0.718368	-0.309946
-0.101627	0.0652435	0.0958414	-0.289443	-0.0497877	0.219746	0.33082	-0.410515	-0.257181	0.270841	0.308001	-0.123942	-0.189459	-0.957137	-0.720002	-0.328468
-0.10927	0.0503374	0.151582	-0.245944	-0.0567067	0.311008	0.325348	-0.401049	-0.255793	0.282355	0.281064	-0.130912	-0.154309	-0.945827	-0.68991	-0.328044
-0.096729	0.0818588	0.124096	-0.217602	-0.0542533	0.292436	0.343356	-0.421997	-0.275148	0.279939	0.264083	-0.148255	-0.135643	-0.916945	-0.676288	-0.31451
-0.0310406	0.0698774	0.146641	-0.188633	-0.0701814	0.133141	0.372867	-0.415012	-0.312507	0.291893	0.151619	-0.202106	-0.0936218	-0.912306	-0.648906	-0.297805
0.034958	0.112331	0.117247	-0.178915	-0.0591538	0.0106999	0.3716	-0.439536	-0.329412	0.262621	0.134114	-0.212274	-0.105785	-0.922409	-0.678654	-0.300227
0.053421	0.111704	0.10023	-0.167846	-0.0126511	-0.0117962	0.351556	-0.434454	-0.309857	0.259586	0.038833	-0.223047	-0.110204	-0.930725	-0.698357	-0.31973
0.0261568	0.106564	0.0473587	-0.166625	0.0423349	-0.0151142	0.323213	-0.449106	-0.301099	0.255225	0.158209	-0.237221	-0.141018	-0.923344	-0.76137	-0.330531
-0.0224464	0.0609601	-0.0127483	-0.16522	0.0989682	0.0214527	0.338906	-0.429464	-0.303368	0.270799	0.16919	-0.251855	-0.10246	-0.92463	-0.747356	-0.344915
-0.0435898	0.0751942	0.00054577	-0.204722	0.116491	0.0596746	0.354897	-0.456223	-0.286059	0.233344	0.208803	-0.315279	-0.160151	-0.925923	-0.736723	-0.355106
-0.0549873	0.0786706	0.00123726	-0.228636	0.119331	0.0902648	0.35915	-0.511469	-0.319168	0.154861	0.0941414	-0.259147	-0.137592	-0.944429	-0.722707	-0.368899
-0.054167	0.0855156	0.0808028	-0.231919	0.0912796	0.0117589	0.360394	-0.510519	-0.346182	0.127062	0.029635	-0.231	-0.099957	-0.915341	-0.778653	-0.340334
-0.0459823	0.0716032	0.0962556	-0.199852	0.00927876	-0.0646828	0.346362	-0.449454	-0.389585	0.143394	-0.0768552	-0.161744	-0.098892	-0.921721	-0.804855	-0.346203
-0.074018	0.0464243	0.122796	-0.107309	-0.0616743	-0.097824	0.35039	-0.423926	-0.380801	0.192071	-0.014362	-0.201987	-0.0417755	-0.918456	-0.804171	-0.346712
-0.145506	0.0090025	0.0436088	-0.0266353	-0.0992004	-0.0529555	0.34848	-0.437781	-0.379391	0.151145	-0.0163519	-0.162397	-0.0538588	-0.92748	-0.755217	-0.365036
-0.173308	0.00945067	-0.0173817	0.0234664	-0.0911479	0.0705326	0.37011	-0.505234	-0.423291	0.0923991	0.046168	-0.155259	0.0381638	-0.90723	-0.80799	-0.374707
-0.190006	0.0398829	-0.101515	0.00750757	-0.084768	0.230642	0.396678	-0.541061	-0.491433	0.00294828	0.0103066	-0.132337	-0.00349575	-0.90053	-0.837529	-0.402421
-0.169396	0.0565664	-0.0841271	-0.0169657	-0.0478918	0.299626	0.409032	-0.612153	-0.573162	-0.00816127	-0.00134516	-0.191	-0.0135882	-0.905274	-0.822519	-0.435544
-0.160068	0.00958433	-0.0675102	0.0005536	-0.0046042	0.268993	0.40302	-0.59104	-0.57834	-0.0035807	-0.119364	-0.235468	0.0143156	-0.901239	-0.791826	-0.414811
-0.127895	-0.0516375	-0.0269401	0.0259181	0.0491906	0.233313	0.413292	-0.587443	-0.568113	0.0221135	-0.20496	-0.24479	0.037077	-0.916244	-0.786689	-0.433104
-0.0906999	-0.111578	-0.0571384	0.0934771	0.0956363	0.214974	0.45075	-0.536818	-0.515366	-0.00798674	-0.194352	-0.21466	0.0654397	-0.921697	-0.847039	-0.466035
-0.0753468	-0.153019	-0.0537915	0.114463	0.149066	0.147401	0.511806	-0.551628	-0.49497	0.0368615	-0.142813	-0.114692	0.0568745	-0.94021	-0.809171	-0.498601
-0.0663675	-0.168359	-0.0817094	0.166604	0.130775	0.0908357	0.557008	-0.535455	-0.464957	0.00385792	-0.171664	-0.0761571	0.12047	-0.924272	-0.812669	-0.456202
-0.0812624	-0.195867	-0.133065	0.18439	0.0723069	0.107102	0.583154	-0.579188	-0.513594	-0.0146488	-0.287838	-0.0457297	0.132011	-0.933108	-0.794833	-0.420237
-0.0826477	-0.1735	-0.218511	0.19976	0.0330667	0.175153	0.57397	-0.60044	-0.577704	-0.124063	-0.333307	-0.0277743	0.104785	-0.934023	-0.837628	-0.418311
-0.0546368	-0.173483	-0.277076	0.176132	0.0428753	0.155934	0.566802	-0.620305	-0.635981	-0.123215	-0.421371	-0.0502877	0.0619825	-0.903463	-0.830366	-0.41955
-0.0503728	-0.13548	-0.224683	0.175025	0.0764291	0.0986232	0.568691	-0.594649	-0.642783	-0.0803579	-0.48697	-0.0331295	0.0716185	-0.866041	-0.769897	-0.432236
-0.0454716	-0.141618	-0.229952	0.139076	0.102816	-0.0511172	0.574078	-0.601338	-0.660135	-0.0433248	-0.512444	-0.0511678	0.0968132	-0.83801	-0.756614	-0.442368
-0.0448488	-0.0713215	-0.201532	0.141634	0.0669679	-0.167837	0.57468	-0.624748	-0.666687	-0.0296127	-0.446017	-0.052427	0.144179	-0.826443	-0.694515	-0.460178
-0.0408334	-0.014091	-0.257672	0.116254	0.00625404	-0.26048	0.535067	-0.645674	-0.69639	-0.0248331	-0.478539	-0.0771889	0.188281	-0.7983	-0.761	-0.448124
-0.0860405	0.023935	-0.233237	0.125659	-0.0515113	-0.153817	0.514505	-0.632162	-0.703747	-0.0199114	-0.58461	-0.149992	0.201664	-0.765954	-0.725369	-0.446717
-0.144204	0.00597457	-0.235413	0.143775	-0.0397105	-0.0625337	0.452123	-0.64797	-0.703843	-0.0313284	-0.612445	-0.155811	0.176629	-0.755708	-0.74773	-0.447479
-0.181515	0.0139954	-0.261262	0.181162	-0.0279837	0.0678273	0.431297	-0.689691	-0.717803	-0.0853441	-0.596052	-0.171715	0.194642	-0.745181	-0.687145	-0.448234
-0.181341	0.0250704	-0.297207	0.234898	-0.010154	0.142491	0.413102	-0.743874	-0.689088	-0.130146	-0.565972	-0.156749	0.230362	-0.757041	-0.709467	-0.486418
-0.174356	0.0227983	-0.334038	0.252798	-0.00994977	0.177689	0.414429	-0.691026	-0.701235	-0.148716	-0.602237	-0.160029	0.253219	-0.76653	-0.726792	-0.502049
-0.162667	-0.0161183	-0.32231	0.248104	-0.0237939	0.159674	0.410344	-0.666621	-0.679486	-0.160827	-0.625305	-0.139643	0.231098	-0.796074	-0.751393	-0.533721
-0.174271	-0.113554	-0.310304	0.270297	-0.0574012	0.108236	0.371071	-0.633668	-0.722182	-0.147756	-0.629928	-0.120863	0.217698	-0.808417	-0.711955	-0.477874
-0.184227	-0.183327	-0.256658	0.302392	-0.0608124	0.191092	0.367868	-0.664024	-0.72769	-0.173916	-0.748058	-0.0772465	0.230725	-0.821895	-0.659614	-0.486861
-0.21008	-0.240679	-0.301173	0.299345	-0.0192421	0.178304	0.339183	-0.641691	-0.742469	-0.193961	-0.76199	-0.084107	0.247152	-0.815815	-0.632879	-0.477065
-0.26086	-0.252153	-0.319581	0.260586	-0.0207229	0.177029	0.360479	-0.609432	-0.737712	-0.22209	-0.752957	-0.0824823	0.278014	-0.798237	-0.630599	-0.485
-0.327202	-0.304917	-0.370151	0.22473	-0.0488447	0.038049	0.353811	-0.625034	-0.747846	-0.184573	-0.673424	-0.110055	0.246467	-0.778738	-0.608908	-0.500982
-0.387882	-0.345098	-0.350931	0.234544	-0.0637477	-0.0488185	0.384057	-0.651601	-0.73555	-0.173629	-0.693473	-0.0989199	0.208794	-0.763745	-0.578294	-0.512884
-0.391479	-0.376747	-0.387496	0.237288	-0.0555435	-0.175929	0.395305	-0.658553	-0.762888	-0.143646	-0.746239	-0.152115	0.180772	-0.764389	-0.562224	-0.527951
-0.395162	-0.409873	-0.408127	0.231041	-0.110909	-0.284703	0.433159	-0.610462	-0.743936	-0.140421	-0.767311	-0.172528	0.172525	-0.753134	-0.575862	-0.508465
-0.362842	-0.422588	-0.410485	0.184818	-0.196072	-0.386538	0.445841	-0.55496	-0.729496	-0.108188	-0.77027	-0.234816	0.122442	-0.737884	-0.573205	-0.496146
-0.343225	-0.401306	-0.352192	0.151816	-0.284554	-0.398974	0.462939	-0.539797	-0.628849	-0.080297	-0.81	-0.283767	0.0747295	-0.699767	-0.595572	-0.485722
-0.350948	-0.40096	-0.368689	0.109424	-0.24064	-0.38284	0.445487	-0.544663	-0.58202	-0.056283	-0.855064	-0.348438	0.0524891	-0.664827	-0.624564	-0.463103
-0.359221	-0.395525	-0.306953	0.101084	-0.233393	-0.359501	0.44089	-0.580215	-0.576358	-0.0539046	-0.853519	-0.32864	0.072246	-0.652092	-0.633201	-0.418796
-0.369058	-0.453022	-0.329788	0.101978	-0.258891	-0.391421	0.435172	-0.579752	-0.607722	-0.0623311	-0.818304	-0.286119	0.0109211	-0.662914	-0.638831	-0.418635
-0.337861	-0.435946	-0.303817	0.134968	-0.365289	-0.316038	0.428091	-0.552453	-0.648855	-0.0706066	-0.766843	-0.257335	0.0118904	-0.66802	-0.647505	-0.418329
-0.352198	-0.455176	-0.302535	0.182866	-0.402014	-0.230944	0.421892	-0.528497	-0.664607	-0.0224442	-0.742674	-0.278996	-0.0155686	-0.694094	-0.62913	-0.435583
-0.377972	-0.437977	-0.27665	0.215616	-0.400939	-0.151355	0.425031	-0.511669	-0.690557	0.00396807	-0.678778	-0.236927	0.0331896	-0.704749	-0.61245	-0.447708
-0.43433	-0.460924	-0.303738	0.208346	-0.412985	-0.123214	0.423317	-0.496871	-0.681903	0.00810556	-0.66667	-0.243964	-0.00499027	-0.730796	-0.59973	-0.464635
-0.431632	-0.418966	-0.331638	0.223547	-0.45778	-0.112176	0.394257	-0.485832	-0.673985	-0.0489438	-0.640632	-0.224938	-0.00784096	-0.738045	-0.624766	-0.467617

## Sheet: Coldplate Cluster 1 cold
-0.36791	-0.53712	-0.43883	0.200446	-0.4017	0.155988	-0.44222	0.09657	-0.21519	-0.74133	-0.06098	-0.66419	-0.13269	-0.38062	-0.19009
-0.35624	-0.54706	-0.45469	0.213236	-0.38668	0.236759	-0.43319	0.116265	-0.22226	-0.69756	-0.06471	-0.64845	-0.0488	-0.35847	-0.14341
-0.35074	-0.55481	-0.45912	0.211232	-0.38668	0.212187	-0.41566	0.173635	-0.17592	-0.65418	-0.00946	-0.67038	0.072647	-0.34521	-0.15456
-0.33467	-0.53432	-0.48062	0.182669	-0.40367	0.238197	-0.32906	0.213753	-0.16679	-0.54967	0.030468	-0.66483	0.047221	-0.32215	-0.16696
-0.32528	-0.52092	-0.4443	0.106015	-0.40606	0.180935	-0.3504	0.275499	-0.20397	-0.46805	0.055421	-0.70314	-0.03484	-0.30272	-0.19721
-0.32707	-0.53061	-0.44166	0.040719	-0.40408	0.19739	-0.36172	0.281337	-0.27845	-0.43377	0.01586	-0.69153	-0.22525	-0.2504	-0.16909
-0.3247	-0.53135	-0.41325	0.085084	-0.39097	0.157328	-0.38352	0.25004	-0.2814	-0.43328	0.000898	-0.75138	-0.13212	-0.16755	-0.12903
-0.33205	-0.54862	-0.36663	0.125999	-0.37488	0.151738	-0.29782	0.235355	-0.24946	-0.4706	-0.04418	-0.72077	-0.0224	-0.11372	-0.13578
-0.31547	-0.55633	-0.35409	0.161073	-0.38086	0.09028	-0.26634	0.161749	-0.29495	-0.54986	-0.0355	-0.74551	0.017583	-0.0438	-0.11903
-0.31839	-0.58633	-0.32841	0.136754	-0.37941	0.060029	-0.28087	0.140892	-0.28495	-0.61479	-0.02181	-0.71715	-0.02529	-0.02478	-0.06154
-0.32932	-0.63094	-0.40535	0.180374	-0.41805	0.030211	-0.31513	0.07833	-0.31524	-0.65087	-0.02345	-0.75095	-0.01733	0.005411	0.018791
-0.37608	-0.65748	-0.44237	0.15262	-0.4358	-0.02222	-0.28595	0.064987	-0.2754	-0.61641	-0.02568	-0.75052	0.067714	0.00657	0.036323
-0.38775	-0.67139	-0.43266	0.157002	-0.46714	-0.02627	-0.25735	0.060219	-0.32941	-0.58384	-0.05549	-0.7419	0.067126	-0.04842	0.034364
-0.40908	-0.654	-0.4372	0.100894	-0.47243	-0.04985	-0.24574	0.013851	-0.32519	-0.66317	-0.0494	-0.71128	-0.06917	-0.12422	0.004478
-0.3977	-0.6278	-0.41072	0.099485	-0.46058	-0.0203	-0.3219	0.005033	-0.30249	-0.66314	-0.08487	-0.68353	-0.26061	-0.21602	0.027084
-0.37098	-0.65413	-0.40961	0.014522	-0.43885	0.006422	-0.31716	0.02996	-0.29963	-0.65907	-0.09465	-0.69608	-0.3827	-0.19916	0.000705
-0.35612	-0.65893	-0.35327	-0.04486	-0.41096	0.024786	-0.38928	0.066759	-0.26235	-0.57966	-0.06936	-0.69589	-0.36535	-0.16078	7.05e-05
-0.34726	-0.61548	-0.31512	-0.07723	-0.43069	0.038325	-0.36468	0.096437	-0.28831	-0.6123	-0.09029	-0.72344	-0.28122	-0.15118	-0.06115
-0.3117	-0.58145	-0.31478	-0.04942	-0.44594	-0.006	-0.3337	0.061951	-0.3011	-0.68605	-0.13204	-0.73861	-0.28095	-0.17523	0.033885
-0.27861	-0.57168	-0.31046	0.000771	-0.41068	-0.01409	-0.27626	0.018515	-0.3238	-0.76421	-0.23425	-0.73994	-0.36645	-0.27956	0.086263
-0.23403	-0.58635	-0.34154	0.038615	-0.3678	-0.04569	-0.2243	-0.03409	-0.26847	-0.75405	-0.28868	-0.69666	-0.47689	-0.29165	0.208768
-0.27286	-0.5601	-0.39885	0.053765	-0.34047	-0.05084	-0.25638	-0.083	-0.15089	-0.72111	-0.31444	-0.68367	-0.3858	-0.26517	0.208648
-0.3067	-0.53582	-0.43082	0.062268	-0.35326	-0.0877	-0.23517	-0.0881	-0.07957	-0.67501	-0.29664	-0.65595	-0.41361	-0.2232	0.266309
-0.33452	-0.56305	-0.43686	0.068418	-0.35584	-0.09808	-0.27023	-0.10043	0.039737	-0.67999	-0.24804	-0.64404	-0.23679	-0.19846	0.264864
-0.35409	-0.63132	-0.39571	0.177883	-0.38842	-0.11619	-0.22571	-0.16218	0.047644	-0.66244	-0.1915	-0.60424	-0.22201	-0.2571	0.282222
-0.34872	-0.64168	-0.42754	0.219635	-0.41617	-0.12954	-0.24153	-0.20557	0.084091	-0.6159	-0.21763	-0.61719	-0.1352	-0.24199	0.255081
-0.33866	-0.61411	-0.39839	0.220717	-0.43636	-0.13347	-0.23811	-0.25282	0.082895	-0.61237	-0.24166	-0.62576	-0.32339	-0.28657	0.238382
-0.31185	-0.55885	-0.41047	0.114443	-0.42257	-0.15314	-0.28415	-0.17779	0.115546	-0.70486	-0.30506	-0.60988	-0.35612	-0.3432	0.205076
-0.29979	-0.59682	-0.38694	0.069187	-0.43874	-0.18677	-0.33494	-0.1885	0.073201	-0.68312	-0.36675	-0.56943	-0.2704	-0.38029	0.122536
-0.29193	-0.60731	-0.40162	0.117256	-0.45271	-0.29975	-0.30687	-0.25165	0.020005	-0.6882	-0.41513	-0.57275	-0.06886	-0.38074	0.058313
-0.29941	-0.65798	-0.44096	0.207946	-0.47519	-0.357	-0.30866	-0.39224	0.009027	-0.59649	-0.48729	-0.59069	-0.02962	-0.35411	-0.04744
-0.29595	-0.66277	-0.48008	0.257012	-0.47115	-0.37332	-0.22497	-0.46753	0.040003	-0.63759	-0.41745	-0.60602	-0.07033	-0.4026	-0.02834
-0.29194	-0.67685	-0.48285	0.232444	-0.49196	-0.32145	-0.20799	-0.52492	-0.01177	-0.60336	-0.42394	-0.57931	-0.09989	-0.45976	-0.00531
-0.28564	-0.64706	-0.46399	0.143125	-0.4694	-0.33187	-0.14221	-0.49629	0.037981	-0.54348	-0.34419	-0.6201	-0.17698	-0.50284	0.093881
-0.27182	-0.60296	-0.43737	0.035814	-0.47629	-0.29225	-0.18183	-0.42631	0.052201	-0.44765	-0.35651	-0.64177	-0.1509	-0.4742	0.085354
-0.26802	-0.64622	-0.50093	0.010443	-0.43422	-0.30882	-0.15514	-0.34225	0.061258	-0.38907	-0.3446	-0.63467	-0.32412	-0.45347	0.074197
-0.25935	-0.67495	-0.54437	-0.03733	-0.4406	-0.28652	-0.17485	-0.32382	-0.07783	-0.43692	-0.35611	-0.61815	-0.39337	-0.45095	0.005122
-0.25074	-0.70188	-0.58897	-0.02657	-0.44081	-0.32833	-0.13282	-0.37748	-0.18324	-0.57384	-0.44672	-0.63084	-0.51972	-0.55612	-0.02948
-0.24221	-0.68625	-0.58514	-0.0476	-0.46301	-0.31947	-0.19216	-0.36125	-0.13252	-0.56616	-0.48684	-0.66565	-0.44272	-0.56393	-0.14998
-0.23704	-0.66218	-0.59892	-0.05492	-0.51027	-0.27095	-0.16781	-0.35337	-0.05703	-0.45626	-0.50441	-0.66504	-0.42554	-0.51687	-0.22951
-0.27893	-0.65481	-0.81212	-0.17157	-0.4578	-0.23406	-0.42503	-0.59143	0.019127	-0.40193	-0.44675	-0.61728	-0.47118	-0.41894	-0.30873
-0.27292	-0.62394	-0.82577	-0.24263	-0.46314	-0.23966	-0.40729	-0.62878	-0.06914	-0.48639	-0.43721	-0.61421	-0.48059	-0.48877	-0.28023
-0.25697	-0.62407	-0.85669	-0.31295	-0.41584	-0.27546	-0.50423	-0.72022	-0.04428	-0.61097	-0.40658	-0.59714	-0.41651	-0.60431	-0.23955
-0.23422	-0.64242	-0.65771	-0.27635	-0.46252	-0.29674	-0.3131	-0.51505	-0.04877	-0.55624	-0.39166	-0.61392	-0.38352	-0.73471	-0.25504
-0.29863	-0.61167	-0.73693	-0.32935	-0.45709	-0.29405	-0.34002	-0.54306	0.031397	-0.47495	-0.38293	-0.59083	-0.18099	-0.74874	-0.29884
-0.37004	-0.57181	-0.76538	-0.38412	-0.4588	-0.26678	-0.30347	-0.49374	-0.01448	-0.38479	-0.35815	-0.56774	-0.07508	-0.70415	-0.31264
-0.39896	-0.5068	-0.75175	-0.44725	-0.459	-0.26989	-0.28431	-0.4864	-0.00649	-0.38713	-0.33329	-0.5545	-0.0039	-0.59383	-0.23548
-0.37068	-0.55028	-0.67748	-0.46021	-0.45195	-0.27255	-0.37277	-0.49665	-0.03876	-0.36136	-0.34242	-0.54222	-0.2208	-0.5203	-0.21189
-0.35591	-0.55239	-0.60554	-0.43404	-0.46026	-0.33286	-0.37117	-0.55064	-0.10901	-0.40314	-0.4323	-0.55118	-0.3071	-0.46168	-0.24391
-0.37156	-0.58682	-0.65252	-0.41078	-0.47975	-0.31761	-0.4396	-0.53785	-0.15155	-0.39369	-0.46822	-0.5421	-0.24196	-0.41577	-0.31639
-0.3612	-0.55749	-0.67342	-0.37936	-0.48771	-0.309	-0.35047	-0.55794	-0.14298	-0.4935	-0.43065	-0.5469	-0.13453	-0.36035	-0.36723
-0.37047	-0.55666	-0.72493	-0.31408	-0.49619	-0.29185	-0.34198	-0.57865	-0.08716	-0.52084	-0.42013	-0.51596	-0.06126	-0.33062	-0.32281
-0.36353	-0.53211	-0.72426	-0.26957	-0.49189	-0.321	-0.29484	-0.64682	-0.08973	-0.56164	-0.43478	-0.50695	-0.04143	-0.28835	-0.28427
-0.40676	-0.58459	-0.74291	-0.30855	-0.49978	-0.32387	-0.29989	-0.70776	-0.07408	-0.54979	-0.45508	-0.49931	-0.12452	-0.25576	-0.26568
-0.40706	-0.55831	-0.74502	-0.3342	-0.50582	-0.34862	-0.2337	-0.71668	-0.12084	-0.46709	-0.42833	-0.53443	-0.08462	-0.17667	-0.2993
-0.38242	-0.58815	-0.72992	-0.33007	-0.51708	-0.35433	-0.10969	-0.74354	-0.13095	-0.5168	-0.30253	-0.54714	-0.04331	-0.21338	-0.34328
-0.37519	-0.6096	-0.77683	-0.29019	-0.52661	-0.35727	-0.05815	-0.76039	-0.17476	-0.46666	-0.28083	-0.54394	0.046814	-0.21978	-0.3186
-0.38732	-0.67058	-0.78351	-0.29999	-0.51684	-0.33499	-0.06233	-0.7489	-0.10848	-0.55052	-0.30872	-0.53364	-0.03815	-0.23289	-0.33809
-0.39556	-0.66511	-0.78937	-0.32233	-0.50795	-0.37243	-0.07857	-0.67538	-0.11112	-0.49086	-0.40024	-0.53331	0.079584	-0.15548	-0.29365
-0.41187	-0.65566	-0.7486	-0.33338	-0.54952	-0.40656	-0.06952	-0.62579	-0.16828	-0.51234	-0.4776	-0.58733	0.137721	-0.17137	-0.23124
-0.42761	-0.61378	-0.7785	-0.36359	-0.59893	-0.44578	-0.0615	-0.68411	-0.24523	-0.46968	-0.52555	-0.61344	0.032726	-0.18897	-0.10813
-0.47676	-0.63978	-0.80641	-0.42033	-0.64943	-0.4504	-0.04207	-0.75129	-0.27437	-0.49898	-0.65775	-0.67633	-0.1018	-0.23146	-0.02347
-0.46918	-0.66185	-0.83275	-0.4483	-0.66494	-0.49683	0.03552	-0.79986	-0.2362	-0.48343	-0.6181	-0.67492	-0.13793	-0.22715	0.053521
-0.46399	-0.73901	-0.80133	-0.47208	-0.66882	-0.55255	0.030087	-0.76229	-0.17238	-0.52173	-0.58956	-0.70277	-0.1241	-0.23295	0.039161
-0.44843	-0.7301	-0.83163	-0.48431	-0.64629	-0.55011	0.020916	-0.79493	-0.05399	-0.56101	-0.5824	-0.69816	-0.16562	-0.24802	0.076106
-0.48973	-0.65631	-0.84274	-0.52738	-0.63517	-0.53661	-0.00436	-0.81964	0.053618	-0.63932	-0.61735	-0.6919	-0.12114	-0.28111	0.056726
-0.5159	-0.63813	-0.89034	-0.54232	-0.63736	-0.50079	0.091539	-0.90485	0.155004	-0.69528	-0.67628	-0.67552	0.086236	-0.32813	0.051985
-0.55132	-0.61073	-0.91945	-0.57572	-0.67518	-0.5041	0.100461	-0.91914	0.140673	-0.71225	-0.64574	-0.61028	0.100047	-0.33628	0.028866
-0.57788	-0.63324	-0.96774	-0.59667	-0.67582	-0.45257	0.123362	-0.9289	0.212512	-0.73734	-0.61909	-0.54956	-0.00902	-0.37198	-0.00224
-0.62162	-0.63777	-0.98109	-0.66026	-0.70449	-0.41711	0.161288	-0.94858	0.218997	-0.7798	-0.62199	-0.4879	-0.08054	-0.42837	-0.01278
-0.66501	-0.6582	-0.94959	-0.68928	-0.68722	-0.37362	0.190421	-1.04254	0.289098	-0.81684	-0.54059	-0.51289	-0.05748	-0.483	-0.08771
-0.69419	-0.69398	-0.95924	-0.72944	-0.73572	-0.38082	0.200256	-1.08634	0.30167	-0.79362	-0.60949	-0.5801	0.107103	-0.45812	-0.10955
-0.71675	-0.70149	-0.98463	-0.74724	-0.73112	-0.35678	0.14023	-1.09056	0.335839	-0.7082	-0.59891	-0.64028	0.008736	-0.4483	-0.14603
-0.74409	-0.69295	-1.04532	-0.73552	-0.76138	-0.33667	0.165411	-1.07212	0.418269	-0.65768	-0.60143	-0.62456	-0.02954	-0.4804	-0.09999
-0.74736	-0.61133	-0.9695	-0.76711	-0.73005	-0.28541	0.092857	-1.06527	0.476102	-0.68251	-0.47141	-0.59409	-0.19454	-0.49274	-0.00775
-0.77922	-0.56014	-0.94307	-0.76651	-0.74777	-0.23376	0.067509	-1.05237	0.564002	-0.7176	-0.33904	-0.52021	-0.08917	-0.48868	0.053796
-0.77883	-0.5658	-0.89824	-0.83143	-0.79879	-0.17384	0.00377	-1.04742	0.55428	-0.73275	-0.28697	-0.52769	0.027612	-0.42237	0.108782
-0.82252	-0.59663	-0.87402	-0.84447	-0.84785	-0.06316	0.057223	-1.07826	0.561532	-0.75664	-0.28195	-0.49568	0.167017	-0.38046	0.112972
-0.81536	-0.6053	-0.83509	-0.85516	-0.87912	-0.07723	0.027621	-1.12537	0.462769	-0.72839	-0.36279	-0.53545	0.243372	-0.30585	0.192033
-0.83231	-0.57843	-0.80011	-0.89001	-0.86439	-0.07329	0.02474	-1.15802	0.419862	-0.68918	-0.3559	-0.52248	0.11369	-0.24879	0.343115
-0.85431	-0.58869	-0.78487	-0.95117	-0.85569	-0.10949	0.048413	-1.11045	0.340549	-0.59254	-0.32647	-0.5136	0.031826	-0.18121	0.569717
-0.88915	-0.59417	-0.81283	-1.02664	-0.89694	-0.12589	0.123489	-1.11318	0.220967	-0.50418	-0.31424	-0.51775	0.013031	-0.16229	0.738422
-0.91669	-0.56592	-0.80552	-1.00901	-0.87136	-0.1822	0.181848	-1.14284	0.140344	-0.40899	-0.40352	-0.4806	0.018211	-0.15298	0.781964
-0.90766	-0.53361	-0.83108	-0.98489	-0.92231	-0.27664	0.1987	-1.22792	0.05277	-0.30507	-0.5442	-0.50225	0.082683	-0.15704	0.7453
-0.92999	-0.4815	-0.82796	-0.95881	-0.93453	-0.31411	0.219309	-1.30617	0.06018	-0.30569	-0.61116	-0.47168	0.051438	-0.11028	0.739032
-0.95451	-0.46765	-0.89241	-1.02508	-1.00708	-0.3172	0.208184	-1.30192	0.075492	-0.30799	-0.57661	-0.48385	0.104755	-0.05554	0.811622
-0.98757	-0.42581	-0.9708	-1.0357	-1.02477	-0.31966	0.249336	-1.3608	0.051249	-0.32501	-0.64233	-0.43109	-0.03289	0.000527	0.836331
-1.00215	-0.41154	-1.03412	-1.10797	-1.05785	-0.32409	0.315708	-1.29555	0.047457	-0.26322	-0.66347	-0.38523	-0.18208	0.107734	0.846132
-1.02006	-0.40304	-1.04535	-1.08138	-1.07403	-0.28137	0.334889	-1.29497	0.071024	-0.1912	-0.79021	-0.32691	-0.39409	0.298247	0.834782
-1.02558	-0.44294	-1.0011	-1.09726	-1.06735	-0.21193	0.317845	-1.16404	0.104804	-0.16839	-0.78401	-0.3143	-0.42269	0.58035	0.879827
-1.03034	-0.47453	-0.90208	-1.07859	-1.0128	-0.13488	0.23306	-1.14422	0.196683	-0.16074	-0.8086	-0.26912	-0.4312	0.826302	1.00174
-1.03198	-0.49862	-0.79679	-1.15151	-0.99891	-0.19069	0.235588	-1.0404	0.140226	-0.16992	-0.9125	-0.23392	-0.10897	1.05504	1.16451
-1.02449	-0.47468	-0.75145	-1.25588	-0.98486	-0.2419	0.187939	-0.99778	0.178721	-0.13248	-0.90839	-0.10486	0.054367	1.23996	1.40336
-1.00913	-0.47552	-0.71603	-1.33619	-0.9528	-0.22326	0.113274	-0.84876	0.089179	-0.12727	-0.96286	0.021002	0.150887	1.47018	1.60096
-0.98426	-0.46467	-0.67674	-1.33477	-0.91191	-0.12803	0.026167	-0.76346	0.100366	-0.13394	-0.96996	0.162306	0.188689	1.59888	1.75594
-0.99986	-0.42771	-0.6011	-1.31819	-0.89383	-0.07178	-0.04799	-0.68377	0.065543	-0.11885	-1.04905	0.226675	0.378104	1.75877	1.85962
-1.00369	-0.37773	-0.58231	-1.27467	-0.90393	-0.06918	-0.05045	-0.60959	0.134157	-0.05556	-1.05047	0.284831	0.743299	1.90775	1.94014
-1.00906	-0.29705	-0.57109	-1.33851	-0.90896	-0.09514	-0.01167	-0.50566	0.251851	0.044168	-0.93157	0.346574	1.24118	2.10207	2.0326
-0.9821	-0.19127	-0.56805	-1.36273	-0.89989	-0.05725	0.110191	-0.40102	0.425493	0.096379	-0.83832	0.393808	1.60174	2.13292	2.09323
-0.95556	-0.08018	-0.51503	-1.42184	-0.86306	-0.03013	0.216653	-0.30416	0.585651	0.069969	-0.73085	0.433915	1.84586	2.12292	2.11266
-0.91164	0.011916	-0.43351	-1.28677	-0.79017	0.035865	0.435638	-0.29881	0.70425	0.044631	-0.67515	0.533195	1.94274	2.13418	2.04834
-0.83993	0.100167	-0.35201	-1.14075	-0.66697	0.066639	0.66098	-0.23414	0.694787	0.061234	-0.56721	0.63419	2.11037	2.18839	1.98483
-0.7583	0.182585	-0.2351	-0.96306	-0.56778	0.107096	0.951502	-0.20645	0.648447	0.202327	-0.52792	0.736554	2.12731	2.21272	1.97472
-0.6643	0.292297	-0.12182	-0.88251	-0.51696	0.151083	1.23077	-0.09909	0.564475	0.315452	-0.52725	0.800667	2.19813	2.1905	1.95356
-0.57778	0.322046	-0.02562	-0.75529	-0.5071	0.193155	1.47676	-0.0798	0.529304	0.312414	-0.49786	0.873592	2.36854	2.17046	1.93376
-0.46904	0.490279	0.06718	-0.62355	-0.48768	0.26451	1.74115	-0.04695	0.524527	0.287457	-0.35418	0.974405	2.67696	2.10985	1.84757
-0.3686	0.703848	0.12925	-0.51436	-0.41947	0.349618	1.91047	-0.01128	0.513292	0.268561	-0.09298	1.04254	2.80265	2.02715	1.75545
-0.30273	0.950081	0.189085	-0.48493	-0.30057	0.477824	2.04816	-0.01631	0.533676	0.304501	0.134029	1.12728	2.73292	1.92618	1.65404
-0.25779	1.10551	0.204761	-0.49516	-0.16577	0.610074	2.10154	-0.02553	0.503566	0.301076	0.371774	1.21459	2.52154	1.83539	1.60433
-0.24738	1.19086	0.201971	-0.50002	-0.02842	0.713365	2.07097	0.018208	0.446464	0.295751	0.563141	1.25989	2.0942	1.78413	1.59117
-0.20526	1.30647	0.238292	-0.49937	0.050266	0.73385	2.06504	0.103048	0.409374	0.383808	0.73583	1.35848	1.52684	1.73888	1.5286
-0.171	1.39783	0.302985	-0.43112	0.134482	0.731827	2.16304	0.175441	0.351133	0.473103	0.757389	1.3845	1.07577	1.71297	1.45311
-0.10499	1.44908	0.33169	-0.34198	0.214453	0.704531	2.32736	0.174537	0.323298	0.541467	0.789021	1.44559	0.774713	1.62572	1.43342
-0.07389	1.47981	0.317482	-0.22079	0.259307	0.721013	2.41152	0.135484	0.293711	0.568435	0.83903	1.44806	0.596709	1.57333	1.44728
-0.04123	1.52019	0.334454	-0.13953	0.271348	0.726797	2.41618	0.126206	0.304368	0.577761	1.01525	1.42266	0.522932	1.53701	1.40127
-0.02998	1.60238	0.397294	-0.04051	0.251573	0.744066	2.39601	0.07356	0.332737	0.563614	1.08736	1.36476	0.454787	1.51202	1.33381
0.005899	1.67814	0.459114	0.026159	0.257147	0.774274	2.39194	0.060447	0.274953	0.494653	1.05549	1.27085	0.515962	1.45901	1.30272
0.046383	1.65083	0.49538	0.115876	0.261469	0.741311	2.32949	0.028143	0.282906	0.423183	0.910132	1.23251	0.480757	1.39641	1.2538
0.088166	1.57196	0.542393	0.187858	0.255816	0.723724	2.25468	0.07293	0.20814	0.461828	0.722144	1.16299	0.475135	1.37532	1.13792
0.107477	1.5192	0.579585	0.207282	0.266828	0.646579	2.16871	0.15922	0.250985	0.463753	0.621621	1.11023	0.429564	1.34725	1.01124
0.123191	1.51799	0.601782	0.210394	0.278224	0.669534	2.1073	0.288607	0.204974	0.51956	0.566042	1.03678	0.511947	1.26496	0.913957
0.153483	1.52465	0.560701	0.185235	0.332531	0.723173	2.03624	0.358919	0.282859	0.502583	0.649229	1.03399	0.442637	1.16409	0.853668
0.201891	1.53547	0.538212	0.255609	0.408676	0.892869	1.99057	0.4209	0.35964	0.485572	0.722411	1.01381	0.560883	1.0678	0.797972
0.273751	1.59688	0.471891	0.30309	0.470971	1.08038	1.93264	0.457858	0.479733	0.489632	0.744362	0.976545	0.543299	0.98319	0.743511
0.328232	1.67599	0.435931	0.360132	0.537757	1.20743	1.90299	0.481198	0.503336	0.491514	0.748992	0.909062	0.674364	0.915711	0.665842
0.379148	1.68408	0.415861	0.389469	0.599068	1.25659	1.87557	0.51567	0.499946	0.563727	0.733506	0.86433	0.60818	0.881631	0.577674
0.401994	1.6173	0.398133	0.412434	0.685848	1.29621	1.81919	0.514643	0.490204	0.548137	0.697326	0.833291	0.514924	0.86643	0.567736
0.420743	1.56581	0.380813	0.427144	0.760019	1.33303	1.80345	0.548696	0.555159	0.523015	0.626588	0.824478	0.353241	0.805599	0.58466
0.442187	1.56633	0.369001	0.396525	0.799326	1.37882	1.76411	0.562965	0.648762	0.548335	0.582277	0.865759	0.278525	0.762642	0.568932
0.473636	1.54903	0.323087	0.372532	0.847744	1.39542	1.73437	0.633689	0.729328	0.586627	0.587461	0.824492	0.350877	0.73191	0.486046
0.5237	1.57452	0.309849	0.382301	0.867638	1.44024	1.68443	0.682182	0.819141	0.661982	0.626545	0.789395	0.467063	0.709969	0.435685
0.563972	1.57567	0.291497	0.464628	0.954061	1.51066	1.67002	0.706479	0.891548	0.642574	0.677771	0.657307	0.556852	0.730726	0.42321
0.592872	1.65836	0.319204	0.584203	1.00017	1.59507	1.69352	0.699061	1.01194	0.546008	0.697042	0.603574	0.614639	0.809849	0.472453
0.617229	1.67274	0.309496	0.703407	1.06016	1.5914	1.6778	0.63578	1.10009	0.522737	0.727689	0.53267	0.576113	0.922235	0.524825
0.613088	1.68519	0.325064	0.73155	1.08861	1.56962	1.6828	0.589126	1.13768	0.520004	0.781971	0.558747	0.493047	0.933075	0.536859
0.633713	1.67827	0.383714	0.727963	1.1115	1.51199	1.6486	0.560679	1.10273	0.530461	0.838315	0.583028	0.289858	0.914633	0.495186
0.636347	1.69094	0.409695	0.669999	1.1369	1.54844	1.64256	0.638016	1.07447	0.543011	0.961399	0.621131	0.165557	0.879123	0.376671
0.679651	1.72969	0.447186	0.694181	1.17433	1.59207	1.62396	0.757263	1.08133	0.504393	0.969505	0.61184	0.114314	0.825206	0.259708
0.685897	1.81946	0.414192	0.69929	1.22983	1.65065	1.56969	0.819608	1.07058	0.553738	1.05069	0.599229	0.131393	0.770884	0.161767
0.752866	1.89744	0.475382	0.731076	1.31465	1.70355	1.5319	0.923241	1.02699	0.537936	1.03616	0.563756	0.262557	0.748725	0.187151
0.7769	1.92777	0.44812	0.720245	1.34247	1.67353	1.45406	0.962087	0.987131	0.589284	1.04974	0.526255	0.331529	0.762154	0.311778
0.799847	1.89915	0.499878	0.736351	1.38851	1.65779	1.48279	1.03839	1.01879	0.618215	1.02278	0.543321	0.251267	0.758411	0.454391
0.763691	1.83973	0.471966	0.711237	1.38986	1.59207	1.42113	1.05129	1.12175	0.638415	1.03762	0.597825	0.11547	0.749575	0.502143
0.785138	1.76244	0.493687	0.707135	1.42038	1.54072	1.40441	1.07067	1.08697	0.648551	1.02525	0.667766	0.026341	0.741397	0.452461
0.806136	1.73585	0.501129	0.712807	1.48081	1.4587	1.34925	1.0949	1.0618	0.642751	0.998458	0.739498	0.153974	0.695395	0.392834
0.828953	1.70819	0.480549	0.731043	1.53223	1.42318	1.35069	1.0901	0.974808	0.660614	0.894615	0.759306	0.267377	0.63074	0.312156
0.824997	1.71574	0.520943	0.778851	1.54218	1.35854	1.27004	1.11964	0.938762	0.600633	0.946039	0.748871	0.301879	0.562271	0.235505
0.881394	1.67747	0.558576	0.760038	1.52232	1.33346	1.18767	1.10966	1.01995	0.630476	1.01313	0.741576	0.267776	0.527509	0.179686
0.925551	1.70582	0.661141	0.782546	1.51902	1.33266	1.10781	1.12588	0.993052	0.590114	1.023	0.745083	0.186791	0.527327	0.152669
0.966496	1.69627	0.676366	0.752243	1.52472	1.43287	1.06513	1.12297	1.09762	0.683573	0.892022	0.709749	0.141185	0.532967	0.122097
0.97825	1.70188	0.712791	0.756882	1.513	1.47479	1.04583	1.15984	1.0324	0.659706	0.731751	0.658696	0.195217	0.562589	0.057634
0.988155	1.65142	0.731797	0.755162	1.47921	1.41774	1.04717	1.1366	1.04966	0.74016	0.688432	0.609753	0.165853	0.544499	0.016716
1.00433	1.64479	0.773045	0.801973	1.48143	1.35141	1.06823	1.11972	0.953169	0.736535	0.662422	0.580954	0.268303	0.530641	0.015903
1.01054	1.64159	0.740758	0.840314	1.4303	1.25206	1.07068	1.08943	0.930781	0.734473	0.634771	0.544078	0.144478	0.534458	0.049288
1.06493	1.60253	0.776902	0.892046	1.42125	1.2648	1.08877	1.10885	1.00619	0.679484	0.646663	0.574572	0.209872	0.538153	0.091063
1.11629	1.60382	0.823635	0.942272	1.36848	1.24374	1.07455	1.10808	1.11524	0.676475	0.642374	0.616389	0.340203	0.516782	0.107347
1.15352	1.59766	0.911039	0.973144	1.38395	1.29519	1.13464	1.08868	1.18385	0.705858	0.6697	0.660782	0.405188	0.506182	0.131372
1.1657	1.61057	0.962929	0.993228	1.35978	1.26679	1.09924	1.03985	1.11439	0.658335	0.625239	0.621506	0.444776	0.50136	0.164005
1.20327	1.56562	0.9871	0.966508	1.37863	1.25473	1.10023	1.03147	1.1758	0.666864	0.67032	0.62085	0.268769	0.524913	0.21493
1.26157	1.56331	0.984639	1.04092	1.37685	1.20295	1.03325	1.04986	1.21517	0.669261	0.700935	0.621689	0.236115	0.509581	0.240092
1.29952	1.61475	0.977354	1.09697	1.38304	1.11962	1.08588	1.0991	1.41508	0.720298	0.760284	0.690956	0.295636	0.475258	0.242824
1.32045	1.61734	1.00048	1.1128	1.40356	1.03687	1.06755	1.14774	1.47825	0.668408	0.71636	0.698765	0.301835	0.435341	0.215739
1.34387	1.56577	1.03674	1.10201	1.43626	0.983656	1.05076	1.13864	1.50867	0.692858	0.746653	0.689639	0.377316	0.399243	0.229739
1.38015	1.46607	1.06434	1.07451	1.50577	0.958533	0.978875	1.14831	1.44531	0.680846	0.721475	0.643233	0.252799	0.432915	0.234965
1.41083	1.37636	1.10187	1.12964	1.48101	0.890012	0.928431	1.16696	1.33875	0.671053	0.685966	0.637194	0.285938	0.459671	0.261113
1.40827	1.27562	1.07686	1.15318	1.44493	0.816627	0.846021	1.15162	1.28534	0.592175	0.605923	0.642949	0.159459	0.49224	0.349246
1.46067	1.20745	1.1107	1.23869	1.40179	0.776579	0.762001	1.16707	1.25785	0.50207	0.54519	0.619272	0.20844	0.490639	0.405253
1.49825	1.2091	1.11287	1.29225	1.42054	0.752285	0.747142	1.13319	1.31034	0.506443	0.567488	0.576102	0.173021	0.494544	0.459574
1.52376	1.24971	1.12709	1.34811	1.42281	0.791033	0.74477	1.13153	1.30585	0.465041	0.54343	0.519665	0.312442	0.447647	0.417022
1.49723	1.25857	1.12381	1.39223	1.42317	0.825724	0.737088	1.10932	1.31282	0.48066	0.534489	0.478042	0.292635	0.441713	0.504565
1.49854	1.21161	1.05469	1.44146	1.42115	0.873838	0.720813	1.08275	1.25062	0.442081	0.484943	0.470069	0.227601	0.434769	0.599876
1.51866	1.18579	1.05355	1.45019	1.41541	0.884072	0.763988	1.11749	1.27478	0.453029	0.465128	0.429177	0.273551	0.495375	0.734363
1.54509	1.17615	0.984037	1.41007	1.36507	0.876174	0.764687	1.13622	1.22386	0.416129	0.392498	0.371891	0.290004	0.518849	0.779505
1.54492	1.20388	1.03457	1.36844	1.35992	0.869201	0.775971	1.14948	1.21298	0.356978	0.374532	0.323387	0.338846	0.556174	0.783387
1.56809	1.19837	1.04434	1.31335	1.30296	0.820764	0.693151	1.18835	1.16933	0.274427	0.317334	0.276205	0.171305	0.514708	0.761018
1.57611	1.20614	1.15172	1.34108	1.31025	0.862458	0.697528	1.20016	1.22058	0.225844	0.327887	0.24598	0.126347	0.415544	0.74122
1.58391	1.15619	1.18744	1.35017	1.25142	0.794973	0.722197	1.26455	1.26066	0.245548	0.358914	0.170927	0.271788	0.355625	0.732184
1.59359	1.09901	1.26298	1.41105	1.26589	0.76232	0.747854	1.2809	1.28286	0.247009	0.448133	0.141386	0.369385	0.296544	0.731544
1.57763	1.07234	1.21416	1.37045	1.25733	0.665697	0.74676	1.3106	1.24671	0.254969	0.526276	0.161564	0.374069	0.27901	0.692499
1.562	1.13793	1.21663	1.35749	1.24811	0.739561	0.70413	1.27626	1.17451	0.242887	0.561228	0.165713	0.204447	0.226464	0.682255
1.52734	1.23213	1.2003	1.27888	1.28947	0.803689	0.64525	1.17399	1.19706	0.296027	0.642115	0.193522	0.20314	0.196763	0.575098
1.55402	1.31937	1.27632	1.27663	1.29238	0.870071	0.617588	1.16776	1.14695	0.348662	0.734211	0.226671	0.221526	0.167318	0.461365
1.60312	1.37685	1.35701	1.27943	1.35059	0.949816	0.593075	1.23196	1.12729	0.43741	0.803023	0.365184	0.225528	0.112936	0.257601
1.6553	1.44988	1.40974	1.33816	1.36657	1.04918	0.690487	1.30352	1.13184	0.518998	0.896287	0.503059	0.214309	0.048541	0.128861
1.66334	1.48064	1.41591	1.33741	1.38079	1.14458	0.700724	1.29163	1.14632	0.674452	0.945894	0.592384	0.084747	-0.05994	0.019664
1.66574	1.50734	1.39431	1.28702	1.37937	1.20229	0.702629	1.26552	1.19493	0.739334	0.958349	0.558219	0.177416	-0.08806	0.032314
1.6929	1.49049	1.40595	1.26087	1.37865	1.26399	0.719485	1.2777	1.15474	0.760984	0.888493	0.541311	0.105768	-0.09515	0.095231
1.72776	1.53749	1.42721	1.25157	1.41361	1.34125	0.696146	1.28047	1.23467	0.668988	0.828652	0.520737	0.366047	-0.07141	0.17948
1.74579	1.54119	1.44651	1.31663	1.44241	1.35879	0.644122	1.26613	1.24263	0.57153	0.810173	0.522322	0.427676	-0.05805	0.26614
1.72942	1.52756	1.46767	1.39201	1.42884	1.31378	0.570849	1.29394	1.285	0.500018	0.766477	0.462939	0.617915	-0.06116	0.340746
1.72072	1.56404	1.50362	1.42228	1.3826	1.24189	0.577223	1.29925	1.22101	0.481063	0.686239	0.421882	0.518703	-0.07136	0.369163
1.74559	1.57115	1.53398	1.43048	1.3357	1.15829	0.628391	1.25539	1.19782	0.53877	0.5884	0.407219	0.398048	-0.11195	0.287068
1.79648	1.58081	1.59135	1.37296	1.29102	1.16427	0.616346	1.22455	1.12576	0.565688	0.572553	0.3967	0.334737	-0.1638	0.166138
1.79712	1.48842	1.59784	1.43119	1.25839	1.14721	0.611809	1.2531	1.15789	0.588155	0.520352	0.365822	0.405725	-0.19424	0.086403
1.81265	1.46372	1.6429	1.41177	1.22878	1.1856	0.619526	1.32807	1.19614	0.585444	0.514811	0.310599	0.601103	-0.20438	0.100413
1.82439	1.4361	1.6286	1.46901	1.21711	1.1593	0.637842	1.31616	1.32313	0.5437	0.484724	0.245492	0.70656	-0.19704	0.110791
1.8675	1.37878	1.61754	1.49023	1.20743	1.1502	0.628757	1.26659	1.29269	0.491185	0.380642	0.226442	0.735077	-0.16766	0.123886
1.87777	1.38371	1.59046	1.57005	1.24504	1.14094	0.644164	1.20055	1.34012	0.43495	0.448338	0.256927	0.630323	-0.15031	0.104264
1.86544	1.3896	1.54913	1.57643	1.29112	1.15917	0.6595	1.20606	1.2486	0.390931	0.419236	0.273176	0.537994	-0.15669	0.060692
1.89007	1.44048	1.55374	1.55889	1.31741	1.20155	0.741953	1.24171	1.24061	0.416332	0.508233	0.263133	0.351906	-0.14534	0.032812
1.87925	1.4229	1.55117	1.52412	1.32663	1.20442	0.830908	1.26874	1.21505	0.40505	0.461888	0.203462	0.285254	-0.16063	0.077023
1.87816	1.42362	1.56903	1.49513	1.29574	1.21587	0.928267	1.26396	1.16197	0.440021	0.41937	0.22365	0.278073	-0.13562	0.11258
1.88784	1.39815	1.59982	1.50259	1.32121	1.19813	0.988066	1.18099	1.13959	0.334146	0.422979	0.210766	0.314367	-0.12459	0.1676
1.90925	1.38868	1.58471	1.53321	1.27108	1.23795	1.01501	1.14835	0.990776	0.22514	0.341155	0.186425	0.355176	-0.14337	0.119128
1.91381	1.40152	1.60244	1.58632	1.26803	1.31014	1.06475	1.10336	0.898709	0.17712	0.376056	0.133657	0.326061	-0.20156	0.056841
1.88523	1.44919	1.61096	1.64711	1.23149	1.36298	1.11834	1.08739	0.843889	0.262199	0.368023	0.084303	0.216979	-0.26742	-0.02756
1.92016	1.45525	1.63723	1.71379	1.23509	1.38889	1.18463	1.09736	0.853915	0.400269	0.425727	0.109441	0.028898	-0.32249	-0.11359
1.96294	1.38914	1.69435	1.80349	1.2112	1.37512	1.18785	1.08981	0.892413	0.523041	0.364917	0.073992	-0.09716	-0.39466	-0.23841
2.00976	1.29905	1.74998	1.90472	1.16765	1.38718	1.17009	1.06914	0.833128	0.629379	0.362063	0.080689	-0.02672	-0.45988	-0.40147
2.02503	1.27108	1.83451	1.99047	1.10644	1.42772	1.15419	0.982884	0.802086	0.709348	0.297878	0.033414	0.155872	-0.54159	-0.57032
2.03805	1.34131	1.84255	1.97161	1.06399	1.46749	1.14558	0.955006	0.821457	0.744817	0.317944	0.022076	0.209867	-0.5404	-0.65059
2.05991	1.39557	1.88416	1.90718	1.05883	1.50864	1.19256	1.01917	0.847411	0.69515	0.281323	-0.00152	0.236717	-0.52889	-0.69548
2.07229	1.4066	1.84926	1.90493	1.0593	1.53888	1.17461	1.04157	0.837941	0.704555	0.200789	-0.01984	0.091979	-0.49816	-0.68533
2.12111	1.35428	1.90368	1.93682	1.0786	1.49365	1.18774	1.0574	0.818294	0.740073	0.089258	-0.02034	0.002738	-0.51418	-0.69279
2.18118	1.28135	1.86485	1.99834	1.06324	1.44192	1.20192	1.02441	0.784897	0.873317	0.042334	-0.00173	-0.17147	-0.50945	-0.70036
2.25895	1.25492	1.90721	1.99114	1.03968	1.37875	1.26822	1.02611	0.788452	0.932053	0.043327	0.040492	-0.27036	-0.52003	-0.75099
2.26718	1.25528	1.88815	2.02535	0.99223	1.35877	1.29974	1.04406	0.73532	0.942227	0.119703	0.066591	-0.35453	-0.52553	-0.7748
2.23839	1.23615	1.88628	2.02837	0.97728	1.36023	1.30287	1.0778	0.743469	0.876996	0.200888	0.104872	-0.38953	-0.55954	-0.8283
2.21375	1.1923	1.91313	2.04705	0.98307	1.31469	1.28447	1.14546	0.711376	0.818187	0.26094	0.153798	-0.35901	-0.58364	-0.81026
2.22654	1.15024	1.90009	2.03444	1.01097	1.2994	1.28765	1.21873	0.740337	0.76646	0.227345	0.181451	-0.30641	-0.61833	-0.77682
2.27398	1.23734	1.93527	2.04406	0.991986	1.27511	1.23574	1.19906	0.710999	0.760962	0.261551	0.148014	-0.1871	-0.64683	-0.72774
2.26993	1.36286	1.89735	2.07359	0.997369	1.28628	1.1841	1.15787	0.730349	0.701043	0.259375	0.135986	-0.11688	-0.64589	-0.75908
2.26684	1.45525	1.95743	2.13219	0.956267	1.27073	1.16671	1.09395	0.684381	0.665908	0.296783	0.129945	-0.12666	-0.57463	-0.75322
2.26009	1.46533	1.9963	2.1032	0.924242	1.28699	1.17078	1.07267	0.714377	0.696289	0.202632	0.138226	-0.14092	-0.52018	-0.75931
2.25616	1.4909	2.04909	2.09745	0.882895	1.32333	1.20241	1.05442	0.751492	0.781503	0.254409	0.115242	-0.22548	-0.49864	-0.58928
2.29508	1.54246	2.03243	2.12175	0.906348	1.37621	1.18733	1.0641	0.86422	0.829225	0.34388	0.082667	-0.17443	-0.53055	-0.47709
2.31405	1.59313	2.03383	2.13095	0.933451	1.37532	1.14288	1.09954	0.771676	0.853609	0.376707	0.079291	-0.23816	-0.49454	-0.51207
2.33764	1.59879	2.00097	2.12601	0.935406	1.37348	1.13749	1.1425	0.72288	0.920492	0.439455	0.059535	-0.2418	-0.36705	-0.5807
2.31685	1.59086	1.98028	2.12491	0.907278	1.3612	1.12134	1.13962	0.584728	1.07146	0.452886	0.05924	-0.25217	-0.29197	-0.69489
2.31381	1.59516	1.98016	2.17328	0.941045	1.34719	1.18332	1.14306	0.653719	1.20313	0.504989	0.042719	-0.13984	-0.28332	-0.65677
2.31824	1.60416	2.05056	2.16149	1.01438	1.32135	1.18107	1.12505	0.658761	1.2605	0.494276	0.064612	-0.18417	-0.39185	-0.6745
2.33033	1.6586	2.11403	2.11289	1.07875	1.28603	1.21404	1.09588	0.765771	1.25528	0.495752	0.119655	-0.11441	-0.38186	-0.67748
2.32098	1.71573	2.115	2.07477	1.14143	1.30525	1.20588	1.10247	0.908647	1.16898	0.57531	0.140664	-0.03985	-0.32929	-0.60446
2.30504	1.76603	2.09221	2.03233	1.17165	1.30224	1.14508	1.14527	0.967922	1.0824	0.581807	0.142889	0.172157	-0.20302	-0.53459
2.25594	1.74402	2.07253	2.0281	1.17604	1.28746	1.12182	1.18188	0.908175	1.0448	0.582883	0.161927	0.131258	-0.07346	-0.40872
2.23638	1.72899	2.08103	1.99493	1.13798	1.17575	1.10578	1.2063	0.721114	0.983189	0.55563	0.199189	0.190157	-0.09936	-0.54205
2.2497	1.71669	2.07474	1.97991	1.10882	1.177	1.16816	1.21386	0.729076	0.905228	0.606171	0.23353	0.320098	-0.10271	-0.67998
2.31527	1.72923	2.09332	1.95565	1.0951	1.25032	1.20561	1.22742	0.711658	0.793629	0.588554	0.188592	0.489446	-0.15284	-0.80033
2.35372	1.71365	2.07312	1.98282	1.0978	1.38659	1.18495	1.18508	0.766531	0.807654	0.632641	0.150835	0.500697	-0.07085	-0.74499
2.32277	1.66801	2.01386	1.98296	1.10538	1.42766	1.162	1.13996	0.726559	0.814291	0.577363	0.103379	0.524491	-0.03841	-0.73569
2.26158	1.64124	1.93362	1.92962	1.11557	1.37829	1.13604	1.14278	0.72338	0.785459	0.567997	0.097252	0.461145	-0.04234	-0.73807
2.23608	1.65406	1.86692	1.8901	1.14943	1.35906	1.14896	1.16613	0.713579	0.690773	0.567996	0.09269	0.463739	-0.06909	-0.7457
2.22135	1.60495	1.87942	1.87823	1.14179	1.27002	1.12698	1.21954	0.650465	0.600826	0.597313	0.112015	0.2417	-0.1164	-0.66755
2.19585	1.58376	1.92132	1.86752	1.15488	1.23026	1.09411	1.22088	0.630615	0.556786	0.611482	0.138216	0.312232	-0.09529	-0.53836
2.15402	1.51067	1.999	1.86205	1.12622	1.20558	1.05821	1.24491	0.605318	0.561497	0.580464	0.164436	0.324989	-0.06521	-0.37786
2.14614	1.56174	2.01819	1.86192	1.11614	1.2614	1.02114	1.2237	0.62841	0.522694	0.569391	0.236059	0.376381	-0.07889	-0.26591
2.14198	1.58723	2.03132	1.90091	1.07746	1.31784	0.987216	1.19426	0.588723	0.463278	0.545928	0.31733	0.330758	-0.11021	-0.30206
2.12599	1.62121	2.00434	1.86647	1.0458	1.33636	0.954939	1.16141	0.518066	0.402122	0.497797	0.386407	0.346232	-0.14977	-0.31385
2.11088	1.61168	1.98733	1.81353	1.03666	1.31715	0.885563	1.18129	0.482775	0.370694	0.298301	0.396693	0.380181	-0.12538	-0.37136
2.08896	1.54965	1.8794	1.74943	1.05593	1.26232	0.775503	1.21724	0.510379	0.342967	0.217782	0.357432	0.29225	-0.13713	-0.41359
2.10529	1.46985	1.82926	1.68163	1.05383	1.18796	0.705438	1.26161	0.538877	0.357695	0.066119	0.30701	0.347006	-0.12854	-0.44272
2.06126	1.37002	1.78913	1.57169	1.06188	1.12325	0.685212	1.29419	0.495716	0.424036	0.102462	0.263737	0.374209	-0.13738	-0.50186
2.03139	1.30293	1.77857	1.45077	1.11109	1.04653	0.704681	1.35501	0.415502	0.440708	0.125181	0.224227	0.430901	-0.07366	-0.44019
1.93444	1.25406	1.76369	1.34326	1.16886	1.01418	0.675841	1.3889	0.351259	0.333692	0.119848	0.202874	0.154392	-0.03951	-0.44302
1.94263	1.21343	1.72982	1.30446	1.21632	0.944985	0.62926	1.35493	0.308974	0.305563	0.067927	0.16414	-0.0212	0.002942	-0.42948
1.92487	1.1879	1.74694	1.33297	1.2074	0.897166	0.588173	1.36005	0.297644	0.325474	0.00211	0.116141	-0.0191	0.009111	-0.4484
1.8934	1.13762	1.67322	1.34335	1.18136	0.836951	0.577971	1.25179	0.263632	0.460245	-0.03672	0.102449	-0.06323	0.01557	-0.38876
1.82339	1.06974	1.63869	1.38373	1.1215	0.848027	0.588003	1.2101	0.206519	0.520139	-0.05526	0.078707	-0.07024	0.035589	-0.33046
1.79234	1.029	1.60128	1.36719	1.08125	0.841412	0.565315	1.08092	0.093839	0.499771	-0.06106	0.08941	-0.29538	0.03765	-0.36246
1.74959	1.00602	1.57406	1.33312	1.05925	0.769593	0.501657	1.11241	0.097771	0.439419	0.034737	0.090975	-0.4041	0.027457	-0.43565
1.71986	0.992056	1.53429	1.27161	1.0519	0.715687	0.423849	1.13765	0.12183	0.404979	0.132561	0.065912	-0.30701	0.004963	-0.50642
1.67362	0.916602	1.41523	1.19344	1.01911	0.696554	0.315767	1.13529	0.197863	0.449596	0.152482	0.042637	-0.11987	-0.00474	-0.44626
1.67894	0.851923	1.3719	1.19574	0.960763	0.67507	0.277305	1.14474	0.186618	0.436544	0.143602	-0.02489	0.131784	-0.04229	-0.39177
1.65781	0.837787	1.33511	1.18586	0.939246	0.623119	0.284157	1.14137	0.188356	0.322975	0.160512	-0.01889	0.041681	-0.03236	-0.28108
1.61448	0.838674	1.3196	1.12217	0.917713	0.643118	0.326623	1.15599	0.198258	0.16704	0.210234	-0.03113	-0.09009	-0.04891	-0.24601
1.56103	0.865495	1.27774	1.01879	0.905512	0.66336	0.2602	1.11662	0.176033	0.099772	0.192838	0.020047	-0.23088	-0.00137	-0.18134
1.54978	0.84072	1.2337	0.971884	0.869316	0.64137	0.228798	1.06051	0.125057	0.111888	0.16125	0.061864	-0.24094	0.04084	-0.16231
1.55298	0.830604	1.22494	0.988428	0.832658	0.536179	0.186112	1.05311	0.067898	0.226572	0.109008	0.138483	-0.05263	0.101772	-0.08533
1.56484	0.836225	1.19069	1.02246	0.818752	0.477709	0.195388	0.997831	0.014729	0.23001	0.119218	0.13609	0.093496	0.096114	-0.08927
1.54777	0.843096	1.17973	1.08202	0.805643	0.438218	0.212722	0.921638	0.030376	0.260546	0.115507	0.156941	0.124816	0.082292	-0.04082
1.54363	0.887163	1.16745	1.13029	0.820716	0.3915	0.206828	0.836646	0.009354	0.209985	0.116808	0.147419	-0.02535	0.070766	-0.11116
1.53458	0.889562	1.16792	1.14922	0.830248	0.352004	0.215627	0.795618	0.011244	0.184443	0.128376	0.182428	0.015934	0.138577	-0.12127
1.51081	0.894134	1.04843	1.04219	0.808173	0.310623	0.095873	0.770227	-0.02132	0.111387	0.163383	0.163052	-0.00481	0.183588	-0.13533
1.47769	0.837191	0.975667	1.03043	0.792659	0.256649	0.027697	0.754844	0.012226	0.10456	0.197348	0.107096	0.035494	0.210227	-0.1134
1.48501	0.796261	0.955709	1.00014	0.776732	0.226271	-0.05291	0.735828	-0.01806	0.15429	0.140577	0.054037	-0.05209	0.201906	-0.09456
1.50794	0.760123	1.02492	1.02817	0.820785	0.182294	-0.03105	0.73454	-0.03521	0.235492	0.132745	0.001561	-0.08274	0.183665	-0.09061
1.56919	0.807103	1.06894	0.979023	0.857763	0.184371	-0.02976	0.68033	-0.05078	0.334139	0.068152	0.000825	-0.24595	0.16696	-0.10176
1.5951	0.821698	1.03351	0.996499	0.841991	0.149208	0.005876	0.610892	-0.00893	0.439124	0.107346	-0.01722	-0.37694	0.077824	-0.18754
1.59121	0.885841	0.967972	1.00493	0.811842	0.13829	-0.01852	0.533328	-0.04876	0.497339	0.083589	-0.05157	-0.47052	-0.02799	-0.31289
1.58357	0.866411	0.900582	1.04385	0.750693	0.10785	-0.05319	0.50312	-0.11697	0.448903	0.085565	-0.09321	-0.32048	-0.126	-0.38275
1.51778	0.925341	0.737214	0.977797	0.764228	0.049607	-0.30294	0.31704	-0.16753	0.422521	0.10387	-0.12813	-0.36798	-0.11678	-0.41049
1.52941	0.977752	0.774636	1.01933	0.727407	-0.00222	-0.3469	0.337675	-0.18655	0.395686	0.093591	-0.15034	-0.24313	-0.14749	-0.41977
1.5021	1.01296	0.732811	1.04896	0.713552	-0.04438	-0.36749	0.322521	-0.2101	0.420531	0.134375	-0.10554	-0.46705	-0.17206	-0.44172
1.55394	0.95824	0.854539	1.2078	0.699236	-0.07241	-0.17387	0.448889	-0.24447	0.390556	0.145966	-0.07029	-0.41478	-0.24013	-0.45562
1.53702	0.925211	0.777635	1.2439	0.669723	-0.0934	-0.24223	0.436652	-0.26639	0.459341	0.099971	-0.03668	-0.48474	-0.2892	-0.51358
1.53826	0.901737	0.781034	1.2777	0.601756	-0.14234	-0.1884	0.440197	-0.31734	0.485192	0.032824	-0.05996	-0.19116	-0.34304	-0.58423
1.51102	0.879718	0.741884	1.2443	0.54509	-0.16659	-0.23744	0.461424	-0.35889	0.438923	-0.00324	-0.10602	-0.0271	-0.40138	-0.6343
1.49484	0.739094	0.719606	1.16901	0.507745	-0.2032	-0.21411	0.459619	-0.41481	0.350645	-0.1054	-0.12572	0.097912	-0.38371	-0.58083
1.51042	0.648095	0.721019	1.11727	0.485197	-0.2348	-0.33045	0.469563	-0.45841	0.319187	-0.18106	-0.16932	0.156982	-0.37972	-0.52483
1.52631	0.575629	0.74037	1.13423	0.435988	-0.22523	-0.31452	0.524007	-0.46589	0.316348	-0.26833	-0.1679	0.169702	-0.35561	-0.4796
1.55118	0.542479	0.740588	1.17995	0.395874	-0.21649	-0.36874	0.559157	-0.47202	0.28191	-0.29291	-0.18301	0.124169	-0.31607	-0.50389
1.52741	0.463861	0.647931	1.16336	0.407342	-0.16844	-0.32677	0.557917	-0.4183	0.230208	-0.33174	-0.17538	-0.02772	-0.32639	-0.54641
1.49929	0.388557	0.591003	1.13302	0.403501	-0.15885	-0.38188	0.557355	-0.41622	0.247729	-0.35848	-0.21737	-0.05798	-0.32875	-0.57418
1.4743	0.324896	0.546672	1.12918	0.373267	-0.1174	-0.37344	0.537476	-0.42679	0.242581	-0.29582	-0.28728	-0.00358	-0.39786	-0.62146
1.45952	0.28125	0.536385	1.09539	0.336349	-0.09976	-0.45369	0.544553	-0.4945	0.231659	-0.34737	-0.28581	0.033825	-0.43572	-0.63336
1.46881	0.225805	0.509431	1.04672	0.324469	-0.07245	-0.50363	0.579912	-0.51982	0.216348	-0.36061	-0.23219	-0.13838	-0.46601	-0.64676
1.47205	0.168723	0.502272	1.04695	0.34172	-0.09752	-0.5281	0.565675	-0.53174	0.242156	-0.3774	-0.13465	-0.35642	-0.4543	-0.62941
1.48772	0.129877	0.483812	1.0271	0.320009	-0.08439	-0.54417	0.588341	-0.52745	0.244772	-0.27441	-0.14381	-0.49904	-0.45251	-0.66023
1.45456	0.098693	0.409067	1.02272	0.276202	-0.10008	-0.57001	0.559987	-0.62513	0.265282	-0.34153	-0.14386	-0.47015	-0.43992	-0.68693
1.44142	0.047311	0.338111	1.01189	0.28787	-0.12762	-0.6474	0.58678	-0.65876	0.272247	-0.35339	-0.17235	-0.4691	-0.48139	-0.7095

## Sheet: Coldplate Cluster 1 control
-0.577248	-0.353541	-0.47024	-0.171785	-0.181066	-0.316148	-0.459793	-0.542772	-0.386283	-0.478959	-0.0101851	-0.208429	-0.542894	-0.758465	-0.17091
-0.534605	-0.311613	-0.458541	-0.142418	-0.180348	-0.270769	-0.441271	-0.530413	-0.387512	-0.466923	0.0206429	-0.223744	-0.454977	-0.784125	-0.21515
-0.531702	-0.305549	-0.431061	-0.119746	-0.191394	-0.195514	-0.365666	-0.508353	-0.454651	-0.482407	-0.0724828	-0.243119	-0.510062	-0.790794	-0.23002
-0.494916	-0.312578	-0.370322	-0.128447	-0.210358	-0.103822	-0.356289	-0.511263	-0.466735	-0.478622	-0.0590242	-0.248582	-0.410268	-0.803628	-0.226511
-0.545512	-0.336285	-0.317001	-0.123877	-0.19364	-0.0803378	-0.35202	-0.553248	-0.456891	-0.443207	-0.0570242	-0.250861	-0.332709	-0.857652	-0.296286
-0.561948	-0.324082	-0.280074	-0.0777068	-0.170023	-0.0866185	-0.346898	-0.596577	-0.383402	-0.454753	-0.0347643	-0.24127	-0.190484	-0.890379	-0.313626
-0.611228	-0.330385	-0.296525	0.0024187	-0.146905	-0.102813	-0.352182	-0.570095	-0.259108	-0.496818	-0.105087	-0.253784	-0.0292202	-0.948077	-0.310909
-0.606851	-0.366714	-0.297104	-0.0405756	-0.187221	-0.140701	-0.313783	-0.540225	-0.316986	-0.540374	-0.162784	-0.280965	0.0604482	-0.981075	-0.232787
-0.605553	-0.386172	-0.280883	-0.0680025	-0.182312	-0.14601	-0.306584	-0.482965	-0.293003	-0.481085	-0.110814	-0.264604	0.0065121	-0.975533	-0.220035
-0.60011	-0.364524	-0.322526	-0.0763076	-0.188194	-0.169818	-0.299047	-0.532093	-0.376933	-0.436257	-0.0512454	-0.253483	-0.128502	-0.951991	-0.285683
-0.594619	-0.35107	-0.364528	-0.0676237	-0.183988	-0.0761322	-0.363585	-0.592465	-0.317989	-0.415164	-0.075153	-0.230346	-0.287692	-0.94872	-0.382181
-0.597361	-0.39984	-0.41347	-0.0937844	-0.224248	-0.0456307	-0.431901	-0.654574	-0.405584	-0.43362	-0.141176	-0.265336	-0.29951	-0.868074	-0.363074
-0.579278	-0.449782	-0.408752	-0.106611	-0.236842	-0.0042621	-0.470521	-0.675415	-0.467289	-0.478767	-0.17262	-0.271392	-0.265348	-0.800292	-0.341362
-0.568445	-0.46594	-0.41551	-0.141318	-0.225519	-0.0696834	-0.498352	-0.649788	-0.524045	-0.562726	-0.105177	-0.275904	-0.296486	-0.773677	-0.288183
-0.581007	-0.44821	-0.389827	-0.183546	-0.206718	-0.037949	-0.455991	-0.610882	-0.483378	-0.54875	-0.0109137	-0.294445	-0.30806	-0.777207	-0.31171
-0.57425	-0.412123	-0.356235	-0.194016	-0.211676	-0.0387802	-0.485247	-0.599025	-0.444502	-0.557007	0.11661	-0.320164	-0.364632	-0.737764	-0.297722
-0.584854	-0.412295	-0.316946	-0.187497	-0.210208	0.0103706	-0.483864	-0.580316	-0.404127	-0.51609	0.128705	-0.322947	-0.282789	-0.604948	-0.325319
-0.556334	-0.377783	-0.363368	-0.172088	-0.192209	-0.0513931	-0.555288	-0.589946	-0.416742	-0.493964	0.124321	-0.270033	-0.163922	-0.523544	-0.340284
-0.558891	-0.396394	-0.3464	-0.196873	-0.207666	-0.07203	-0.6068	-0.539118	-0.46979	-0.493259	-0.00478114	-0.292983	-0.0786045	-0.524048	-0.347367
-0.566467	-0.341628	-0.405886	-0.197246	-0.220362	-0.145843	-0.62957	-0.548068	-0.503882	-0.541901	0.0417862	-0.309256	-0.0312484	-0.563076	-0.333691
-0.587776	-0.366119	-0.387507	-0.199083	-0.262837	-0.229207	-0.626831	-0.550995	-0.536702	-0.62735	0.0328288	-0.389388	-0.0875609	-0.5523	-0.386891
-0.598759	-0.352687	-0.387991	-0.200107	-0.250981	-0.26507	-0.528471	-0.603802	-0.47582	-0.628039	0.110024	-0.352266	-0.112413	-0.496885	-0.427156
-0.609223	-0.414124	-0.328886	-0.234767	-0.220366	-0.298484	-0.505469	-0.593071	-0.48233	-0.637867	0.0884516	-0.329074	-0.153624	-0.431906	-0.494484
-0.610091	-0.407207	-0.337093	-0.240469	-0.19951	-0.23793	-0.437924	-0.627638	-0.416634	-0.64073	0.0818332	-0.281237	-0.174443	-0.403968	-0.534731
-0.62155	-0.46659	-0.397957	-0.248217	-0.209308	-0.240045	-0.519775	-0.6128	-0.465437	-0.685242	-0.0240909	-0.297106	-0.159591	-0.36865	-0.611823
-0.599726	-0.482573	-0.459967	-0.146904	-0.243158	-0.284147	-0.548533	-0.644697	-0.474296	-0.710212	-0.0858652	-0.32267	-0.249279	-0.375144	-0.626391
-0.611997	-0.552282	-0.46063	-0.140914	-0.28372	-0.319708	-0.575735	-0.559738	-0.52593	-0.691112	-0.145997	-0.36991	-0.182748	-0.402583	-0.644478
-0.603697	-0.584735	-0.448438	-0.173696	-0.297147	-0.33035	-0.510465	-0.526874	-0.487213	-0.734127	-0.126944	-0.395852	-0.150543	-0.431631	-0.606926
-0.648423	-0.599216	-0.452093	-0.229917	-0.306668	-0.336527	-0.451338	-0.493106	-0.473006	-0.69849	-0.18223	-0.421884	-0.100021	-0.376284	-0.584241
-0.648304	-0.590395	-0.487464	-0.243193	-0.255327	-0.365077	-0.474582	-0.519645	-0.487856	-0.757072	-0.192893	-0.414608	-0.184012	-0.315162	-0.543961
-0.675652	-0.581708	-0.492393	-0.192445	-0.239432	-0.432316	-0.46044	-0.556906	-0.536376	-0.726297	-0.247161	-0.434068	-0.292031	-0.307895	-0.552098
-0.678478	-0.591517	-0.445941	-0.180218	-0.228337	-0.462375	-0.487449	-0.573472	-0.535026	-0.779989	-0.266733	-0.455736	-0.286981	-0.376089	-0.544841
-0.689205	-0.60253	-0.364124	-0.143012	-0.252337	-0.503086	-0.433391	-0.581043	-0.498853	-0.773256	-0.319662	-0.458039	-0.323254	-0.449869	-0.512463
-0.689662	-0.609326	-0.325963	-0.149103	-0.30684	-0.506308	-0.426554	-0.583557	-0.509461	-0.754773	-0.301617	-0.480354	-0.157061	-0.5128	-0.50486
-0.68092	-0.685686	-0.391717	-0.156793	-0.356972	-0.478554	-0.368481	-0.635008	-0.499029	-0.705078	-0.274094	-0.516064	-0.20212	-0.522762	-0.506668
-0.702586	-0.689943	-0.456649	-0.137942	-0.404691	-0.505314	-0.376154	-0.690954	-0.533044	-0.61828	-0.299344	-0.56185	0.0180507	-0.529191	-0.467984
-0.718027	-0.669985	-0.485472	-0.155441	-0.411263	-0.49414	-0.311738	-0.688702	-0.553042	-0.58937	-0.340437	-0.589439	0.0786381	-0.452369	-0.411903
-0.73023	-0.639324	-0.464907	-0.169882	-0.381221	-0.506205	-0.330008	-0.682297	-0.579271	-0.604062	-0.416437	-0.596898	0.207512	-0.466447	-0.425038
-0.746953	-0.634009	-0.488849	-0.218395	-0.363871	-0.491944	-0.323686	-0.663132	-0.52835	-0.6994	-0.389977	-0.635166	0.102732	-0.488948	-0.525532
-0.759941	-0.660201	-0.547453	-0.291847	-0.356221	-0.527881	-0.402079	-0.661874	-0.460167	-0.722498	-0.336035	-0.634188	-0.0225149	-0.582381	-0.578202
-0.769559	-0.599087	-0.567142	-0.295922	-0.369564	-0.522042	-0.373902	-0.610016	-0.426293	-0.770648	-0.302437	-0.659677	0.0187668	-0.601446	-0.611107
-0.766826	-0.560604	-0.608386	-0.352868	-0.381304	-0.497763	-0.400063	-0.60686	-0.443483	-0.790739	-0.281019	-0.612231	0.0464243	-0.607772	-0.628992
-0.770898	-0.507324	-0.620495	-0.327527	-0.356017	-0.478863	-0.353629	-0.627034	-0.417227	-0.839092	-0.354056	-0.611443	0.0250401	-0.601039	-0.659319
-0.790568	-0.525637	-0.639672	-0.376158	-0.34186	-0.49876	-0.406224	-0.690853	-0.384657	-0.850247	-0.350378	-0.555904	0.0670731	-0.680592	-0.664185
-0.789892	-0.582828	-0.644457	-0.359519	-0.346446	-0.540087	-0.307516	-0.744886	-0.41992	-0.863297	-0.361057	-0.597017	0.169981	-0.71124	-0.639772
-0.824426	-0.67949	-0.653533	-0.362734	-0.380955	-0.572403	-0.252105	-0.750255	-0.458939	-0.945269	-0.341273	-0.595147	0.294068	-0.742241	-0.614315
-0.808065	-0.717633	-0.692634	-0.403263	-0.42999	-0.623684	-0.196219	-0.734854	-0.555267	-1.01827	-0.354238	-0.614617	0.121505	-0.720015	-0.608288
-0.830719	-0.742829	-0.707448	-0.403855	-0.461678	-0.654474	-0.261695	-0.71356	-0.565898	-1.04553	-0.481868	-0.604764	-0.00713957	-0.715741	-0.612302
-0.832348	-0.75566	-0.684868	-0.436815	-0.491584	-0.711731	-0.258225	-0.688341	-0.67259	-1.07222	-0.537084	-0.607997	-0.145375	-0.730597	-0.600072
-0.869539	-0.781585	-0.664264	-0.385719	-0.484888	-0.735164	-0.183044	-0.732486	-0.652922	-1.06813	-0.661289	-0.605417	-0.121306	-0.67407	-0.582665
-0.870071	-0.75951	-0.71968	-0.401785	-0.484683	-0.748977	-0.107975	-0.765431	-0.649588	-1.089	-0.55455	-0.559703	-0.317614	-0.574508	-0.545955
-0.87887	-0.677347	-0.765834	-0.411174	-0.493529	-0.737166	-0.0907456	-0.846578	-0.633089	-1.02871	-0.519088	-0.544423	-0.4039	-0.452551	-0.537388
-0.872635	-0.656745	-0.808645	-0.431619	-0.516675	-0.734552	-0.0513493	-0.843449	-0.638756	-1.07293	-0.415338	-0.578287	-0.4768	-0.436281	-0.524747
-0.891806	-0.704424	-0.763357	-0.424212	-0.500435	-0.702677	-0.01031	-0.853541	-0.661774	-1.1395	-0.389223	-0.618481	-0.304942	-0.444118	-0.511461
-0.876087	-0.759594	-0.769265	-0.34913	-0.505048	-0.667334	-0.0216727	-0.889103	-0.646304	-1.12791	-0.437899	-0.638946	-0.10868	-0.484979	-0.504864
-0.897089	-0.764181	-0.711725	-0.398535	-0.499221	-0.628745	-0.042125	-0.877537	-0.684108	-1.11389	-0.458306	-0.634335	-0.049296	-0.521407	-0.465824
-0.909684	-0.717339	-0.741848	-0.431707	-0.538535	-0.612383	-0.084739	-0.87044	-0.721281	-1.04204	-0.52756	-0.673749	-0.0329992	-0.599033	-0.526158
-0.919316	-0.692729	-0.72314	-0.509463	-0.547064	-0.619454	-0.0826776	-0.829295	-0.775103	-1.09935	-0.604899	-0.687503	-0.0184811	-0.644326	-0.573505
-0.917071	-0.66052	-0.739612	-0.487613	-0.56789	-0.663033	-0.140858	-0.839315	-0.793824	-1.08832	-0.631378	-0.693902	0.0655461	-0.633817	-0.614029
-0.909553	-0.632974	-0.673899	-0.455402	-0.563225	-0.71574	-0.146116	-0.851026	-0.74262	-1.01502	-0.678954	-0.67301	0.102364	-0.566254	-0.532772
-0.92762	-0.628614	-0.674886	-0.470987	-0.563808	-0.734558	-0.175154	-0.8688	-0.697953	-0.883915	-0.578111	-0.68329	-0.0933462	-0.562619	-0.476283
-0.925112	-0.624524	-0.701086	-0.487898	-0.540824	-0.686773	-0.162847	-0.867191	-0.630068	-0.698714	-0.52768	-0.684155	-0.0851634	-0.51715	-0.45498
-0.91153	-0.612565	-0.697824	-0.607441	-0.586338	-0.676501	-0.228001	-0.862647	-0.678287	-0.699742	-0.482756	-0.695887	-0.0923547	-0.521678	-0.460681
-0.91316	-0.636765	-0.716008	-0.656246	-0.577333	-0.748023	-0.314001	-0.803425	-0.674942	-0.690697	-0.489647	-0.678624	0.0333407	-0.458196	-0.450527
-0.928489	-0.621298	-0.684753	-0.692948	-0.612287	-0.728058	-0.360733	-0.756794	-0.699179	-0.764422	-0.51513	-0.66508	0.0886391	-0.42803	-0.481357
-0.9512	-0.629307	-0.704729	-0.65724	-0.574738	-0.704877	-0.331815	-0.73549	-0.639307	-0.76405	-0.513053	-0.613354	0.101797	-0.448471	-0.518
-0.970381	-0.590436	-0.706508	-0.65819	-0.611324	-0.624177	-0.276164	-0.764368	-0.651724	-0.813387	-0.543457	-0.583816	0.0715742	-0.501967	-0.500094
-0.98153	-0.617478	-0.735969	-0.668034	-0.624329	-0.673357	-0.250736	-0.852828	-0.67486	-0.737082	-0.552445	-0.509449	0.0619775	-0.558696	-0.461875
-0.971695	-0.715182	-0.758548	-0.659722	-0.624715	-0.714244	-0.25286	-0.924352	-0.689042	-0.714946	-0.596879	-0.475946	0.0971754	-0.590272	-0.411258
-0.949008	-0.727963	-0.761106	-0.637922	-0.590766	-0.756701	-0.210195	-0.996857	-0.693889	-0.715734	-0.681601	-0.426513	0.160019	-0.598298	-0.400332
-0.965836	-0.749082	-0.747222	-0.603344	-0.590661	-0.763418	-0.15475	-1.02261	-0.715416	-0.719238	-0.706149	-0.409947	0.123098	-0.630918	-0.341972
-1.00899	-0.705506	-0.767007	-0.662143	-0.621001	-0.751751	-0.133235	-1.01795	-0.729691	-0.678475	-0.745417	-0.420179	0.0625023	-0.642449	-0.351819
-1.04219	-0.733549	-0.746341	-0.684446	-0.664929	-0.740629	-0.153525	-1.01284	-0.703182	-0.548471	-0.716692	-0.435279	0.0263463	-0.650905	-0.371394
-1.05381	-0.708464	-0.76523	-0.757126	-0.64524	-0.751778	-0.232258	-1.00069	-0.616332	-0.574905	-0.688351	-0.467291	0.0623861	-0.681806	-0.403132
-1.08468	-0.719687	-0.735235	-0.784128	-0.65682	-0.742113	-0.244664	-0.93829	-0.517517	-0.62314	-0.641946	-0.471552	0.132447	-0.748949	-0.37053
-1.11003	-0.721516	-0.760944	-0.883418	-0.613704	-0.725533	-0.220702	-0.873735	-0.412116	-0.729255	-0.587932	-0.508402	0.125086	-0.717295	-0.276774
-1.13304	-0.704921	-0.717028	-0.938943	-0.651621	-0.703464	-0.184739	-0.86334	-0.402992	-0.835144	-0.555474	-0.525518	0.0762522	-0.712536	-0.180756
-1.14325	-0.667667	-0.682492	-0.949745	-0.664331	-0.689916	-0.123508	-0.930183	-0.399165	-0.920002	-0.47049	-0.560315	0.0708537	-0.707202	-0.128106
-1.16357	-0.65369	-0.636992	-0.884072	-0.710702	-0.666515	-0.106161	-1.00734	-0.427843	-0.921712	-0.40796	-0.52336	0.130435	-0.753286	-0.161838
-1.18681	-0.686933	-0.668983	-0.842415	-0.74771	-0.676979	-0.0993039	-1.02254	-0.467769	-0.844765	-0.456068	-0.50494	0.168893	-0.802114	-0.20684
-1.18363	-0.686916	-0.732679	-0.854984	-0.767335	-0.680581	-0.142616	-1.0715	-0.514885	-0.744259	-0.541149	-0.478962	0.0422127	-0.791045	-0.204293
-1.21701	-0.670327	-0.798956	-0.933885	-0.787174	-0.733344	-0.203987	-1.11026	-0.502218	-0.604481	-0.673874	-0.487609	-0.160191	-0.782113	-0.175381
-1.23921	-0.64266	-0.832983	-1.01182	-0.782201	-0.740528	-0.208069	-1.16864	-0.43687	-0.54749	-0.615386	-0.503089	-0.344966	-0.591543	-0.134939
-1.28947	-0.593531	-0.864908	-1.01163	-0.796427	-0.766383	-0.242683	-1.1113	-0.415456	-0.486953	-0.598676	-0.517837	-0.410535	-0.480752	-0.166325
-1.29667	-0.616422	-0.911413	-1.06505	-0.798481	-0.752729	-0.244518	-1.03882	-0.462481	-0.492225	-0.550854	-0.548633	-0.4161	-0.304747	-0.208029
-1.2964	-0.631885	-0.966359	-1.10544	-0.825216	-0.708933	-0.232476	-0.947799	-0.52537	-0.449825	-0.702974	-0.553015	-0.475173	-0.214045	-0.235419
-1.28764	-0.685509	-0.984156	-1.19788	-0.81964	-0.686891	-0.201226	-1.0008	-0.588291	-0.450341	-0.805608	-0.546054	-0.627792	-0.0889575	-0.151604
-1.28658	-0.663356	-0.92472	-1.18729	-0.858184	-0.668199	-0.130708	-1.03939	-0.610447	-0.443863	-0.845167	-0.50482	-0.558456	-0.0189106	-0.0636495
-1.29613	-0.648255	-0.869481	-1.16817	-0.834178	-0.667075	-0.0808377	-1.07759	-0.566855	-0.4026	-0.794854	-0.500389	-0.573998	0.151778	-0.0204241
-1.29656	-0.604142	-0.834441	-1.16804	-0.863779	-0.683674	-0.0164829	-1.01405	-0.538302	-0.247131	-0.77685	-0.495066	-0.314031	0.488767	0.00224354
-1.30478	-0.625444	-0.854974	-1.19343	-0.863261	-0.717274	0.0109345	-0.966363	-0.476323	-0.186384	-0.804773	-0.492965	-0.218871	0.875111	0.112398
-1.31059	-0.628124	-0.841363	-1.22784	-0.90002	-0.815203	-0.0014255	-0.959885	-0.529478	-0.21571	-0.883249	-0.454775	0.107208	1.20114	0.258124
-1.31454	-0.621195	-0.829295	-1.32196	-0.915499	-0.842159	-0.0221053	-0.985033	-0.480356	-0.272595	-0.840056	-0.391592	0.281417	1.4478	0.384181
-1.32299	-0.568102	-0.79525	-1.39322	-0.959141	-0.87386	-0.0323331	-0.961537	-0.464732	-0.351066	-0.798623	-0.375526	0.491665	1.68274	0.436446
-1.30065	-0.562992	-0.793213	-1.42808	-0.969035	-0.872115	0.00263623	-0.873723	-0.378192	-0.39241	-0.732581	-0.268771	0.641583	1.89456	0.494762
-1.32953	-0.485523	-0.782997	-1.4287	-0.968814	-0.947769	0.0478878	-0.792917	-0.274687	-0.388227	-0.690864	-0.139909	0.954695	2.16001	0.605929
-1.31831	-0.370093	-0.803675	-1.40983	-0.966133	-0.945881	0.0856372	-0.775407	-0.165539	-0.356275	-0.673775	0.0351296	1.37691	2.32761	0.73591
-1.34814	-0.255911	-0.817812	-1.45159	-0.949332	-0.935791	0.0708007	-0.795908	-0.0266069	-0.321317	-0.630934	0.104406	2.05836	2.47281	0.900601
-1.3034	-0.193978	-0.812757	-1.46223	-0.957652	-0.91499	0.038389	-0.756259	0.0443039	-0.323594	-0.66473	0.128173	2.54302	2.52629	0.953835
-1.2897	-0.130528	-0.79156	-1.50314	-0.943262	-0.9302	0.0400799	-0.671237	0.0782936	-0.270849	-0.632786	0.189175	3.20471	2.56349	0.938486
-1.25536	-0.0360479	-0.770006	-1.4805	-0.952124	-0.948039	0.148858	-0.529465	0.108307	-0.207204	-0.553551	0.260761	3.42129	2.53895	0.903994
-1.23943	-0.0425415	-0.743843	-1.36324	-0.923699	-0.868297	0.298757	-0.507994	0.0649117	-0.199449	-0.488528	0.400534	3.20251	2.45357	0.903192
-1.1852	-0.0507192	-0.630513	-1.18176	-0.889341	-0.793709	0.51943	-0.590511	0.0732727	-0.172186	-0.400754	0.485379	2.57853	2.39834	0.93188
-1.11913	-0.0611553	-0.457946	-0.989438	-0.825981	-0.666568	0.770045	-0.703641	0.0993397	-0.16232	-0.294409	0.573932	1.85917	2.31789	0.87983
-1.01558	-0.11266	-0.282393	-0.82078	-0.761141	-0.611138	1.00364	-0.760316	0.0886373	-0.15771	-0.211006	0.606349	1.52818	2.28973	0.827102
-0.93211	-0.188083	-0.199638	-0.761965	-0.706657	-0.498305	1.13807	-0.75795	0.0817317	-0.129686	-0.148608	0.713687	1.08745	2.2414	0.772261
-0.880996	-0.277912	-0.200337	-0.803473	-0.612609	-0.408929	1.13717	-0.690498	0.0788744	-0.069589	-0.133356	0.863952	0.73033	2.17702	0.791538
-0.869036	-0.344153	-0.268512	-0.821874	-0.537443	-0.29392	1.15489	-0.569306	0.128721	-0.0161321	-0.0232525	1.00969	0.579442	2.00053	0.746775
-0.850914	-0.418188	-0.319758	-0.7879	-0.475391	-0.223462	1.15405	-0.469301	0.135989	0.0118204	0.0253959	1.11397	0.495738	1.82808	0.709904
-0.842269	-0.437474	-0.350947	-0.735395	-0.504868	-0.235725	1.17651	-0.483749	0.0584831	0.0974496	0.0463335	1.1571	0.504928	1.7016	0.657837
-0.816024	-0.406177	-0.324629	-0.732056	-0.497435	-0.273181	1.24919	-0.515751	0.0266096	0.183736	0.0933847	1.21389	0.475964	1.6541	0.660825
-0.81709	-0.349244	-0.339821	-0.728829	-0.499042	-0.351189	1.33222	-0.528353	0.0487324	0.15738	0.065528	1.23637	0.509917	1.62526	0.715913
-0.788345	-0.354579	-0.337042	-0.703445	-0.466857	-0.379032	1.40698	-0.505156	0.129754	0.0999517	0.0836074	1.29088	0.552356	1.5203	0.681348
-0.760555	-0.344218	-0.349961	-0.70537	-0.470104	-0.368415	1.40494	-0.490437	0.184824	0.0743155	0.0416656	1.30476	0.554279	1.44966	0.643354
-0.715229	-0.35632	-0.295314	-0.697831	-0.448691	-0.27555	1.3816	-0.454751	0.19688	0.0934015	0.172167	1.29247	0.474016	1.39955	0.557879
-0.691593	-0.331432	-0.264035	-0.755393	-0.450533	-0.1806	1.32721	-0.382055	0.200478	0.16925	0.251605	1.27414	0.521147	1.47084	0.523396
-0.693011	-0.300799	-0.259728	-0.846382	-0.43571	-0.0629544	1.23291	-0.320136	0.24573	0.173178	0.261672	1.27112	0.414624	1.479	0.440801
-0.662494	-0.268509	-0.274255	-0.917399	-0.404927	-0.0151156	1.14589	-0.243952	0.335498	0.185219	0.273925	1.28852	0.40029	1.46167	0.426262
-0.612009	-0.314259	-0.225541	-0.877148	-0.3923	-0.0107305	1.11811	-0.232455	0.370897	0.158745	0.284095	1.28976	0.271063	1.43353	0.44669
-0.566533	-0.309941	-0.160593	-0.778654	-0.362713	-0.0151922	1.1435	-0.259401	0.427393	0.175829	0.259196	1.3039	0.175564	1.48487	0.520972
-0.535517	-0.315671	-0.113994	-0.772781	-0.361192	-0.0189574	1.11391	-0.297719	0.481242	0.206501	0.284139	1.29933	0.0996365	1.51588	0.504207
-0.530961	-0.270548	-0.107839	-0.773356	-0.325278	-0.00619011	1.10668	-0.289304	0.489883	0.233313	0.354122	1.31001	-0.0471739	1.5277	0.480041
-0.494128	-0.320002	-0.0871713	-0.798791	-0.274051	-0.0505846	1.09663	-0.277886	0.531692	0.204396	0.547744	1.35419	-0.141741	1.48266	0.475783
-0.509684	-0.342935	-0.0750042	-0.72737	-0.233723	-0.09205	1.15921	-0.28625	0.497643	0.130861	0.633258	1.39598	-0.250272	1.50482	0.457273
-0.490267	-0.316072	-0.0613293	-0.721927	-0.226355	-0.144608	1.18518	-0.314491	0.494559	0.0487113	0.684298	1.39875	-0.1935	1.57082	0.4823
-0.460634	-0.261185	-0.0218521	-0.735208	-0.200707	-0.167056	1.13329	-0.247861	0.45761	0.0176923	0.701449	1.38035	-0.182006	1.65263	0.45773
-0.408969	-0.209985	0.00865017	-0.713807	-0.146845	-0.137188	1.05007	-0.182128	0.454409	0.0132311	0.680342	1.35462	0.00673659	1.71358	0.47371
-0.386263	-0.213421	0.0135417	-0.672621	-0.101397	-0.137455	0.934894	-0.117566	0.473479	-0.00241241	0.637	1.39084	0.0289326	1.69852	0.375246
-0.396246	-0.19925	0.0129497	-0.600692	-0.100311	-0.102164	0.876457	-0.103597	0.440511	-0.00797959	0.65898	1.3814	0.079256	1.61099	0.29877
-0.399139	-0.209105	0.00353283	-0.614713	-0.0887823	-0.143867	0.819245	-0.10787	0.427276	0.0671364	0.674601	1.38301	0.0438879	1.50925	0.203794
-0.382707	-0.17671	0.0123251	-0.649663	-0.0735177	-0.13387	0.77923	-0.117625	0.386235	0.0938803	0.651972	1.35069	0.0644817	1.42609	0.186507
-0.370515	-0.18622	0.0079058	-0.619118	-0.044187	-0.157834	0.775507	-0.118176	0.416212	0.111041	0.609114	1.31978	0.0782926	1.40074	0.198669
-0.361372	-0.206888	0.0359051	-0.551876	-0.0438215	-0.161223	0.797538	-0.105926	0.439831	0.00354103	0.570818	1.24514	0.0503277	1.32354	0.216524
-0.366241	-0.189798	0.0330203	-0.472688	-0.00032811	-0.160285	0.825153	-0.107019	0.571403	0.0263534	0.699119	1.18263	0.056628	1.295	0.240612
-0.343612	-0.146512	-0.0195295	-0.461104	-0.0153222	-0.146915	0.770819	-0.142909	0.580754	0.0453215	0.733658	1.11979	0.040895	1.25904	0.212609
-0.333947	-0.0823766	-0.0928978	-0.51537	-0.00598569	-0.150773	0.62933	-0.157228	0.564501	0.173856	0.797874	1.08393	-0.106013	1.26951	0.1832
-0.297053	-0.0491782	-0.138797	-0.503358	-0.00416159	-0.127667	0.531443	-0.133368	0.479364	0.19654	0.826935	1.01444	-0.159773	1.23971	0.167836
-0.296862	-0.0510948	-0.142869	-0.497482	-0.0336383	-0.136276	0.477258	-0.119573	0.365682	0.270808	0.788304	0.955438	-0.148014	1.20789	0.164907
-0.27458	-0.054326	-0.141037	-0.472756	-0.0357757	-0.177381	0.527496	-0.139105	0.297632	0.286171	0.823525	0.9187	0.0276359	1.06853	0.153171
-0.2934	-0.0533931	-0.163015	-0.487864	-0.0620517	-0.252593	0.496115	-0.131773	0.275223	0.338423	0.76836	0.832239	0.107389	0.947712	0.0994756
-0.262497	-0.0370824	-0.136353	-0.507861	-0.0183859	-0.339957	0.464442	-0.0866462	0.353367	0.339663	0.873427	0.80729	0.161126	0.840121	0.0659085
-0.261464	-0.043879	-0.104687	-0.488175	-0.0188674	-0.335685	0.415714	-0.0275359	0.355393	0.385352	0.858376	0.787485	0.100781	0.840892	-0.01468
-0.246929	-0.0870171	-0.0552952	-0.494984	0.00186056	-0.340829	0.372885	-0.032472	0.372855	0.366375	0.869704	0.821529	0.0426575	0.789134	-0.103638
-0.243962	-0.087856	-0.0319729	-0.488142	0.026452	-0.348016	0.328624	-0.0290937	0.337023	0.436231	0.843696	0.803034	0.0316936	0.784221	-0.0995883
-0.227533	-0.0990838	-0.0256774	-0.509834	0.0494139	-0.391878	0.224433	-0.007243	0.327003	0.43398	0.86265	0.766538	-0.0840932	0.765354	-0.117551
-0.190447	-0.120585	-0.0466543	-0.47665	0.0923333	-0.388228	0.166933	0.0541991	0.284594	0.473812	0.929657	0.730893	-0.253109	0.732128	-0.0902277
-0.186035	-0.15136	-0.0308042	-0.439716	0.0941313	-0.387604	0.108528	0.104224	0.270977	0.428774	0.90188	0.703815	-0.26916	0.620155	-0.219421
-0.175359	-0.146387	-0.0582714	-0.392213	0.0877719	-0.352406	0.105791	0.156671	0.252103	0.42805	0.839347	0.659336	-0.19683	0.561774	-0.228029
-0.159459	-0.170745	-0.0282592	-0.368004	0.0919802	-0.352786	0.0387248	0.17567	0.313714	0.465195	0.742069	0.649801	-0.0385159	0.525354	-0.216258
-0.169448	-0.179879	-0.0146997	-0.390826	0.115484	-0.306537	0.0717412	0.194316	0.389244	0.413773	0.754467	0.622618	-0.163422	0.540699	-0.179258
-0.162055	-0.201972	0.0890382	-0.384251	0.179458	-0.289533	0.0951628	0.194896	0.447418	0.43459	0.783091	0.642971	-0.318704	0.540915	-0.153563
-0.145959	-0.174624	0.159487	-0.381326	0.194996	-0.25518	0.121853	0.186427	0.428582	0.412579	0.823036	0.635477	-0.484414	0.546026	-0.202879
-0.131612	-0.176204	0.194809	-0.340312	0.178628	-0.249565	0.0385614	0.171042	0.377512	0.527838	0.814616	0.638082	-0.457392	0.55503	-0.228185
-0.119588	-0.171755	0.21941	-0.305494	0.152211	-0.211841	-0.0779611	0.15174	0.404398	0.548135	0.864947	0.653683	-0.448884	0.531643	-0.267093
-0.121675	-0.162001	0.270102	-0.29608	0.0964098	-0.181661	-0.135611	0.188216	0.352289	0.541862	0.836943	0.659615	-0.464011	0.499359	-0.263815
-0.062141	-0.175871	0.305488	-0.280744	0.0899072	-0.158338	-0.164245	0.221358	0.358383	0.425864	0.876572	0.663135	-0.60475	0.417911	-0.243912
-0.0323747	-0.185203	0.304523	-0.28857	0.088398	-0.20742	-0.177715	0.21865	0.31342	0.421762	0.924812	0.633732	-0.541235	0.383545	-0.247119
-0.0269408	-0.256547	0.332697	-0.29423	0.112599	-0.244959	-0.169725	0.208183	0.343053	0.37878	1.01985	0.60096	-0.450692	0.383842	-0.291876
-0.0399841	-0.273335	0.337362	-0.292421	0.0792155	-0.336003	-0.2377	0.229074	0.331147	0.453863	0.932287	0.532262	-0.283102	0.427855	-0.316731
-0.0342934	-0.226637	0.392571	-0.269652	0.0785009	-0.336133	-0.260076	0.271675	0.363333	0.399111	0.916956	0.510341	-0.210791	0.379815	-0.337151
0.00630809	-0.14217	0.409419	-0.264507	0.0847669	-0.371218	-0.261706	0.289962	0.382261	0.455629	0.873365	0.471441	-0.196869	0.401872	-0.309613
0.0314369	-0.120426	0.441301	-0.266671	0.13199	-0.348658	-0.264716	0.291809	0.397101	0.478105	0.983824	0.464525	-0.0954432	0.449791	-0.269778
0.0880508	-0.136526	0.419532	-0.286381	0.0829108	-0.363078	-0.238504	0.312937	0.310425	0.552838	0.963747	0.446945	-0.132411	0.533457	-0.232363
0.102978	-0.178088	0.428727	-0.260235	0.0490937	-0.319521	-0.305307	0.32552	0.210021	0.535829	0.932775	0.472644	-0.0355642	0.504291	-0.193866
0.115533	-0.19726	0.389847	-0.260151	0.031368	-0.294679	-0.289882	0.305302	0.106587	0.495569	0.965311	0.499973	-0.0823428	0.499648	-0.152946
0.130355	-0.236233	0.410118	-0.276217	0.0583203	-0.191435	-0.29397	0.29804	0.146619	0.50998	1.01528	0.504875	-0.0226962	0.480221	-0.111844
0.146116	-0.237904	0.374982	-0.279984	0.0940094	-0.163615	-0.238561	0.285007	0.17318	0.513302	1.08226	0.493225	0.0593124	0.453209	-0.156066
0.17326	-0.219098	0.347919	-0.276126	0.0960576	-0.0753697	-0.237588	0.27612	0.224445	0.491654	1.03868	0.52498	0.0451804	0.425638	-0.205476
0.155062	-0.198509	0.309004	-0.2669	0.144241	-0.0993491	-0.288727	0.279495	0.255492	0.462928	1.05878	0.580834	0.133179	0.426721	-0.219332
0.139766	-0.172647	0.29503	-0.269162	0.161494	-0.0695183	-0.347	0.295607	0.299123	0.471849	1.06701	0.655578	0.0741543	0.508663	-0.164779
0.127311	-0.137667	0.286184	-0.240648	0.202488	-0.10501	-0.386408	0.336182	0.356674	0.530526	1.09068	0.705884	0.0834368	0.541261	-0.146621
0.13577	-0.1337	0.303162	-0.228827	0.218465	-0.0781724	-0.414367	0.341765	0.34131	0.486272	0.982743	0.7211	0.0445892	0.585341	-0.159376
0.148341	-0.124134	0.272911	-0.224943	0.232411	-0.0673345	-0.445054	0.321701	0.412668	0.474817	0.938932	0.699531	-0.047691	0.652899	-0.18607
0.141732	-0.156114	0.308543	-0.250648	0.261314	-0.0123845	-0.498757	0.289992	0.424698	0.428919	0.956874	0.669485	-0.0421986	0.701403	-0.13959
0.120335	-0.0648868	0.296759	-0.235522	0.270592	0.0122059	-0.532488	0.245497	0.482604	0.461426	1.01873	0.642842	0.115053	0.784052	-0.0982464
0.152817	-0.03286	0.352835	-0.185832	0.270789	0.0391468	-0.55788	0.207422	0.453951	0.482818	1.02873	0.628261	0.267368	0.79123	0.0174938
0.166066	0.0385496	0.337616	-0.129951	0.237387	0.0185589	-0.574474	0.177644	0.390378	0.535808	0.967556	0.621591	0.347151	0.791196	0.100441
0.184032	0.0188128	0.301463	-0.131024	0.203192	-0.0331938	-0.621553	0.24405	0.310358	0.541569	0.851581	0.609385	0.207328	0.698844	0.235969
0.165555	0.0229953	0.226262	-0.173926	0.182263	-0.102924	-0.599362	0.282833	0.257044	0.598024	0.801037	0.60763	0.243446	0.63461	0.301559
0.197138	-0.0236367	0.237758	-0.238494	0.187002	-0.105809	-0.544171	0.306735	0.274126	0.594671	0.719099	0.615091	0.235081	0.615424	0.361212
0.208007	-0.0744806	0.286228	-0.261643	0.169908	-0.0982721	-0.450578	0.28821	0.292122	0.620402	0.802777	0.680194	0.382952	0.587421	0.373684
0.214877	-0.10682	0.301473	-0.285083	0.175943	-0.0559063	-0.476601	0.309661	0.31651	0.558279	0.872473	0.727165	0.39491	0.565255	0.424164
0.197661	-0.0559565	0.309075	-0.320954	0.169141	-0.0357019	-0.47862	0.354023	0.368587	0.539748	0.968307	0.777525	0.277096	0.54795	0.434192
0.196441	-0.024442	0.306697	-0.308305	0.164786	-0.0348784	-0.531023	0.381249	0.3533	0.525704	0.932281	0.733141	0.0870683	0.567962	0.462309
0.202358	0.0223223	0.326643	-0.336192	0.141041	-0.0165246	-0.504385	0.37295	0.292188	0.482312	0.869507	0.703858	-0.0480799	0.561055	0.488
0.224111	-0.03263	0.340907	-0.270021	0.124383	-0.0546536	-0.439798	0.366445	0.177192	0.485034	0.794626	0.639862	0.08999	0.542153	0.498213
0.241027	-0.049918	0.292766	-0.245944	0.0970605	-0.0653644	-0.312928	0.34081	0.145893	0.43717	0.7584	0.621668	0.0401506	0.473825	0.441645
0.263845	-0.114444	0.266	-0.160944	0.0834105	-0.068797	-0.266777	0.343991	0.133304	0.45043	0.648619	0.596743	0.0699552	0.411846	0.360516
0.252251	-0.133436	0.248308	-0.154835	0.070517	-0.0552504	-0.26179	0.354061	0.110589	0.411033	0.621878	0.564977	-0.0335645	0.368591	0.283634
0.24777	-0.15116	0.328277	-0.157363	0.0811479	-0.0331709	-0.238939	0.403898	0.0918675	0.45817	0.617896	0.549155	0.0364396	0.393292	0.271118
0.229655	-0.122525	0.429392	-0.192196	0.057602	-0.060236	-0.200977	0.471145	0.0964766	0.533706	0.653075	0.495951	-0.00275742	0.448261	0.311392
0.224476	-0.0508934	0.481578	-0.201714	0.0283462	-0.0661172	-0.199714	0.57223	0.109446	0.589029	0.664219	0.466378	0.0283633	0.491709	0.367001
0.230853	-0.00823359	0.505454	-0.263103	0.020218	-0.103377	-0.213548	0.672819	0.0940223	0.568048	0.628663	0.45081	0.0388385	0.582349	0.417102
0.205348	0.0148248	0.452301	-0.302869	-0.00463743	-0.124406	-0.269363	0.730183	0.0221915	0.450615	0.619718	0.472526	-0.00380884	0.609029	0.348804
0.200059	0.00911291	0.433331	-0.352596	0.0114174	-0.164709	-0.271562	0.738146	0.022899	0.373899	0.567299	0.486922	0.0414959	0.629886	0.30609
0.178244	0.0633699	0.396827	-0.31108	-0.0209897	-0.125665	-0.347733	0.707546	0.0342865	0.392897	0.561205	0.496067	0.130889	0.617288	0.190404
0.182411	0.107735	0.439281	-0.331423	0.0241215	-0.106437	-0.370994	0.683551	0.111005	0.429607	0.537507	0.501986	0.271981	0.702323	0.0557383
0.153612	0.108617	0.434092	-0.377285	0.0125469	-0.0490458	-0.421908	0.693466	0.121749	0.475061	0.582579	0.474867	0.391994	0.792401	-0.0581854
0.14765	0.113292	0.420207	-0.45448	0.0260358	-0.0574267	-0.432588	0.707761	0.132019	0.48195	0.559299	0.448899	0.397774	0.945611	-0.0861147
0.139982	0.142364	0.388675	-0.464355	0.0425333	-0.0394315	-0.449096	0.77	0.137203	0.501126	0.498652	0.417526	0.453464	0.936199	-0.0599762
0.142014	0.207767	0.422604	-0.43899	0.0620373	-0.0227171	-0.460118	0.772334	0.161775	0.476193	0.510532	0.410699	0.410453	0.845992	0.0220621
0.156969	0.21715	0.494148	-0.432774	0.0982146	0.0623165	-0.470746	0.771205	0.178367	0.449634	0.545684	0.422949	0.41434	0.574739	0.124101
0.157166	0.24153	0.559747	-0.4173	0.0545221	0.100673	-0.420535	0.757461	0.119397	0.477791	0.584421	0.421918	0.473895	0.470882	0.252886
0.170558	0.25345	0.570867	-0.417434	0.0173507	0.128437	-0.399514	0.721119	0.0884282	0.525625	0.402645	0.400159	0.494037	0.393655	0.275422
0.184911	0.255618	0.572468	-0.374301	0.00023139	0.0910088	-0.381625	0.690482	0.0986932	0.544424	0.352642	0.378141	0.535885	0.442763	0.221514
0.221	0.188336	0.614343	-0.303744	0.0456051	0.018443	-0.421128	0.683222	0.173189	0.540654	0.297728	0.349027	0.4861	0.372871	0.181393
0.243458	0.138224	0.690217	-0.311327	0.0936263	-0.0474767	-0.408795	0.69118	0.219341	0.579795	0.414493	0.365962	0.486536	0.361622	0.158386
0.2215	0.145498	0.727454	-0.34983	0.139855	-0.134085	-0.410754	0.728881	0.190375	0.60075	0.353205	0.317195	0.45527	0.332473	0.140274
0.20113	0.212644	0.705467	-0.45947	0.145558	-0.150338	-0.433036	0.700874	0.118847	0.662875	0.356141	0.295547	0.397315	0.36864	0.0806651
0.177663	0.212004	0.654774	-0.462677	0.141959	-0.17651	-0.461658	0.72885	0.0477159	0.625593	0.308319	0.24413	0.375285	0.377141	0.0046423
0.19378	0.193673	0.662637	-0.449887	0.128579	-0.14923	-0.500737	0.707735	0.00925117	0.520477	0.319979	0.173806	0.33166	0.332447	0.044885
0.212599	0.155562	0.668475	-0.396824	0.135534	-0.158713	-0.483259	0.733545	0.0440546	0.380005	0.375284	0.153799	0.220889	0.291137	0.153467
0.223099	0.151628	0.659408	-0.403531	0.150665	-0.188873	-0.534047	0.734217	0.0679551	0.339872	0.397499	0.119543	0.136812	0.243887	0.287629
0.218306	0.109541	0.620664	-0.425362	0.12276	-0.223744	-0.539079	0.717343	0.0756423	0.348489	0.36409	0.100474	0.0124069	0.223039	0.370656
0.22872	0.0691637	0.618388	-0.430629	0.106539	-0.226365	-0.572602	0.685111	0.0734587	0.445553	0.368837	0.0327807	-0.0794139	0.191719	0.334082
0.234054	0.0638072	0.638363	-0.40177	0.0944428	-0.183476	-0.531709	0.630565	0.0325992	0.405608	0.333392	0.00592633	-0.180524	0.169509	0.210647
0.248476	0.064378	0.671656	-0.335625	0.110003	-0.152429	-0.541192	0.631159	0.0314298	0.511005	0.379893	0.00808168	-0.11978	0.186805	0.0500629
0.237361	0.0960679	0.66334	-0.322937	0.145557	-0.148899	-0.570645	0.601441	-0.019708	0.481384	0.357365	0.0735997	0.0226826	0.201109	-0.0891411
0.241784	0.06553	0.642689	-0.304853	0.154794	-0.142603	-0.608182	0.576095	-0.0044524	0.561336	0.382044	0.110266	0.00267743	0.212109	-0.141962
0.240025	0.0313581	0.606034	-0.312666	0.177974	-0.144793	-0.624653	0.560725	-0.0456605	0.544361	0.408113	0.214728	-0.128767	0.163544	-0.304623
0.25568	-0.0629855	0.603453	-0.310864	0.15412	-0.0721874	-0.642677	0.588746	-0.0460221	0.591824	0.412279	0.265668	-0.268732	0.115211	-0.341043
0.288547	-0.0654309	0.627494	-0.285039	0.185057	-0.0081484	-0.612573	0.621714	-0.0366182	0.579677	0.398187	0.365372	-0.152869	0.097016	-0.385351
0.301539	-0.0381962	0.67101	-0.260409	0.200249	0.0295352	-0.631199	0.581964	0.0152159	0.517859	0.426314	0.40614	-0.186894	0.0982904	-0.289239
0.300564	0.0155616	0.752181	-0.202074	0.208766	0.0564628	-0.600992	0.528401	0.0549201	0.450837	0.429226	0.458769	-0.0455495	0.119226	-0.239392
0.299739	0.0845095	0.798068	-0.174366	0.190305	0.0416888	-0.662748	0.473834	0.0956142	0.426705	0.42657	0.44294	-0.0672236	0.0413363	-0.183138
0.272832	0.102879	0.811162	-0.232232	0.141114	0.037015	-0.725437	0.547844	0.11214	0.381133	0.404816	0.40898	0.0768212	-0.0114288	-0.180005
0.258691	0.113975	0.722877	-0.312624	0.162025	-0.0473114	-0.819701	0.589126	0.175033	0.30468	0.394781	0.373712	0.114076	-0.0853731	-0.22152
0.241619	0.0955139	0.668778	-0.361092	0.159763	-0.0434971	-0.892524	0.617742	0.210381	0.267198	0.484901	0.321712	0.149423	0.011358	-0.246148
0.251782	0.149464	0.653759	-0.34015	0.208433	-0.0843492	-0.885899	0.546136	0.218645	0.33184	0.458458	0.286394	0.2579	0.104075	-0.273743
0.227541	0.159426	0.642886	-0.363145	0.196415	-0.103588	-0.887098	0.495879	0.198559	0.389844	0.457351	0.236245	0.108045	0.195949	-0.244528
0.196292	0.168665	0.620482	-0.419176	0.184626	-0.169551	-0.926583	0.500564	0.17314	0.412475	0.363585	0.2015	0.157126	0.14682	-0.237596
0.168698	0.123856	0.54841	-0.476558	0.127028	-0.189896	-0.955091	0.539226	0.146718	0.377762	0.320889	0.185709	0.153621	0.16303	-0.185623
0.161817	0.122746	0.547054	-0.508384	0.056853	-0.219019	-0.991638	0.598479	0.0527037	0.335369	0.228402	0.158131	0.225068	0.153692	-0.141551
0.140387	0.101639	0.569385	-0.465888	0.0276006	-0.232189	-0.977997	0.623541	0.0156209	0.31289	0.231527	0.159351	0.154461	0.203403	-0.0972577
0.151151	0.0900044	0.576913	-0.388895	0.0109892	-0.237928	-1.02909	0.625921	0.0314759	0.32422	0.182321	0.0797686	0.0494168	0.16635	-0.0814544
0.139091	0.0386323	0.597284	-0.287579	0.0125978	-0.235647	-1.00998	0.591733	0.0124124	0.362489	0.13878	-0.00537829	0.0121086	0.165607	-0.113485
0.136837	0.0509868	0.550878	-0.266649	-0.00725412	-0.238567	-0.942313	0.510344	-0.0232401	0.309531	0.0702663	-0.0753552	-0.0331469	0.131345	-0.139029
0.122629	0.0428634	0.561732	-0.301339	-0.0270622	-0.252963	-0.833685	0.42407	-0.0576456	0.28978	0.0882379	-0.0393707	-0.0952539	0.100969	-0.149874
0.120511	0.0312554	0.546003	-0.375912	-0.0240124	-0.245772	-0.764445	0.381037	-0.0137993	0.294701	0.0951201	0.012578	-0.182537	0.0113529	-0.142831
0.137443	0.00402355	0.591432	-0.365243	-0.0788906	-0.274943	-0.683002	0.375138	-0.0970956	0.353856	0.0503904	0.0533568	-0.327442	-0.0405548	-0.177503
0.111628	0.0375495	0.644836	-0.404867	-0.107226	-0.340447	-0.624229	0.427766	-0.147021	0.353698	-0.0293547	0.033849	-0.49004	-0.0143021	-0.190398
0.105503	0.0751783	0.598043	-0.378278	-0.147068	-0.375476	-0.600421	0.424978	-0.16864	0.384561	-0.031559	0.0215692	-0.572786	0.0620517	-0.224687
0.0806833	0.0823061	0.619334	-0.444258	-0.114881	-0.416356	-0.634665	0.417779	-0.121461	0.422837	-0.045041	0.00294325	-0.65457	0.0962208	-0.322531
0.0961305	0.0350052	0.564928	-0.38518	-0.114331	-0.407172	-0.63356	0.383798	-0.0591865	0.466754	-0.0483227	-0.0117971	-0.668059	0.0728117	-0.425961
0.112778	0.0212105	0.613496	-0.333546	-0.0951108	-0.40951	-0.636371	0.351982	-0.0874049	0.472962	-0.07622	-0.0691224	-0.579838	0.0879704	-0.475922
0.0758139	-0.00327055	0.560099	-0.330552	-0.139983	-0.450059	-0.640905	0.344324	-0.0914199	0.40702	-0.115084	-0.140688	-0.298054	0.125594	-0.488054
0.045326	-0.0563888	0.591772	-0.368231	-0.157265	-0.522508	-0.588259	0.377824	-0.227489	0.416205	-0.176865	-0.200748	-0.0874345	0.185293	-0.40751
0.0197819	-0.0116038	0.592802	-0.421598	-0.212957	-0.515321	-0.457674	0.420149	-0.246277	0.353249	-0.151602	-0.161555	0.0100292	0.179487	-0.407638
0.0649516	-0.0213813	0.608966	-0.381338	-0.155372	-0.470485	-0.398175	0.437794	-0.248747	0.384839	-0.122167	-0.114246	-0.0640581	0.222696	-0.378059
0.084883	0.0119176	0.57877	-0.387144	-0.115218	-0.374683	-0.397571	0.375609	-0.185686	0.290851	-0.0300887	-0.0677378	-0.0126155	0.269164	-0.438695
0.0816192	-0.0392253	0.638064	-0.379317	-0.118744	-0.391414	-0.457011	0.341022	-0.200777	0.186986	-0.0385703	-0.107199	-0.035974	0.352092	-0.423735
0.0557791	-0.0560959	0.663226	-0.455867	-0.116666	-0.387823	-0.547365	0.343407	-0.168082	0.145325	-0.0386717	-0.100029	0.0176583	0.429647	-0.388808
0.0303586	-0.0213915	0.698305	-0.473164	-0.147584	-0.440996	-0.553104	0.374943	-0.180817	0.162683	-0.0428165	-0.077351	-0.0115337	0.503644	-0.357797
0.0125925	-0.017606	0.620035	-0.518059	-0.103043	-0.422568	-0.584305	0.39975	-0.15506	0.247328	-0.107037	-0.0321557	0.129598	0.530531	-0.371452
0.0323796	0.00072799	0.570076	-0.439257	-0.127137	-0.420068	-0.526752	0.391408	-0.231037	0.304577	-0.11215	-0.0424459	0.122305	0.474703	-0.423686
0.0181769	0.00737743	0.554992	-0.452641	-0.121743	-0.391593	-0.57241	0.342343	-0.218267	0.379022	-0.139474	-0.0169721	0.310757	0.418334	-0.468805
0.0126104	-0.0155766	0.558791	-0.440356	-0.157247	-0.43015	-0.590586	0.242982	-0.242526	0.410928	-0.102569	-0.0153126	0.37302	0.44353	-0.421951
-0.0111877	0.0268831	0.563582	-0.526666	-0.14265	-0.423954	-0.590779	0.137262	-0.179177	0.453862	-0.0865102	-0.0346479	0.545457	0.445904	-0.356627
0.0345027	-0.0198228	0.54514	-0.478959	-0.168412	-0.468972	-0.553415	0.0849433	-0.288594	0.495066	-0.137655	-0.116954	0.431286	0.449937	-0.309891
0.0266541	0.0345363	0.556694	-0.477451	-0.120078	-0.455507	-0.45393	0.0791613	-0.241999	0.525975	-0.0844081	-0.149963	0.249302	0.388721	-0.351282
0.00355024	0.0037145	0.542773	-0.454031	-0.123272	-0.463519	-0.400704	0.112294	-0.261927	0.528107	-0.0918	-0.141603	0.208042	0.35891	-0.370048
-0.0522862	-0.00077105	0.512194	-0.475912	-0.100177	-0.434125	-0.399313	0.126834	-0.227485	0.544012	-0.0381321	-0.138645	0.301852	0.304903	-0.382478
-0.0370743	-0.0544742	0.472556	-0.460939	-0.109844	-0.476179	-0.423115	0.0981284	-0.316025	0.586025	-0.11306	-0.178739	0.451016	0.291393	-0.363601
-0.0259919	-0.11194	0.476687	-0.441079	-0.108069	-0.464917	-0.386926	0.0965737	-0.418155	0.529003	-0.136029	-0.159876	0.203787	0.294445	-0.363319
-0.029147	-0.219295	0.476361	-0.472108	-0.101312	-0.496174	-0.337195	0.0944681	-0.411523	0.476337	-0.157822	-0.154065	-0.137501	0.309821	-0.32566
-0.0421507	-0.267104	0.470673	-0.514161	-0.109156	-0.466686	-0.337027	0.124995	-0.408104	0.436632	-0.119684	-0.138974	-0.364668	0.333469	-0.264699
-0.0513808	-0.233712	0.416407	-0.54823	-0.118595	-0.509082	-0.3846	0.12842	-0.357555	0.440969	-0.0732702	-0.178313	-0.275482	0.21068	-0.217726
-0.0737245	-0.146375	0.365017	-0.608821	-0.114464	-0.443723	-0.43151	0.13628	-0.318063	0.38735	-0.0289544	-0.158541	-0.124071	0.110183	-0.185836
-0.105896	-0.117296	0.321128	-0.617928	-0.12979	-0.396851	-0.336358	0.182284	-0.297116	0.254067	-0.0283678	-0.130045	-0.158046	0.0207382	-0.196243
-0.137742	-0.114718	0.25834	-0.625888	-0.199704	-0.374527	-0.29931	0.223542	-0.350921	0.107084	-0.0878189	-0.094101	-0.241279	0.0891561	-0.180656
-0.142582	-0.158541	0.243906	-0.560597	-0.232381	-0.38397	-0.222679	0.263528	-0.385177	0.020916	-0.087871	-0.084668	-0.234416	0.120999	-0.165155
-0.171034	-0.127115	0.244649	-0.534717	-0.263316	-0.399686	-0.249833	0.271535	-0.476244	0.0247673	-0.138378	-0.102541	-0.0939618	0.089789	-0.174655
-0.171916	-0.206219	0.319787	-0.556041	-0.221309	-0.386225	-0.219888	0.267522	-0.479228	0.0639018	-0.0840921	-0.133036	0.131407	0.10456	-0.110875
-0.178939	-0.174279	0.343586	-0.600336	-0.219605	-0.397969	-0.265126	0.265802	-0.517032	0.0862095	-0.137301	-0.174231	0.229507	0.206123	-0.0561541
-0.204301	-0.248859	0.298487	-0.660204	-0.196213	-0.367961	-0.292962	0.326942	-0.52146	0.174612	-0.0871363	-0.19868	0.223312	0.328199	0.0651506
-0.210468	-0.209792	0.260735	-0.627617	-0.227058	-0.346866	-0.243659	0.344222	-0.5221	0.215621	-0.114975	-0.184142	0.109796	0.417398	0.0786159
-0.21943	-0.213318	0.239602	-0.577355	-0.227766	-0.330094	-0.177273	0.351359	-0.528517	0.0962006	-0.0103905	-0.181423	0.0032837	0.362414	0.116963
-0.226553	-0.207659	0.252262	-0.583233	-0.237743	-0.392064	-0.109135	0.321809	-0.396052	-0.094095	0.0143312	-0.131932	-0.00108705	0.336482	0.091054
-0.259188	-0.200707	0.214461	-0.604084	-0.210452	-0.438969	-0.123923	0.286789	-0.331698	-0.240737	0.0846183	-0.139661	0.0257162	0.269551	0.128159
-0.256992	-0.233736	0.215396	-0.624448	-0.201202	-0.442872	-0.163263	0.265198	-0.273292	-0.256978	0.0117365	-0.126735	0.0638108	0.204825	0.0648433
-0.265161	-0.263748	0.194674	-0.548923	-0.203462	-0.452939	-0.213881	0.191311	-0.36373	-0.159831	-0.0338625	-0.168907	0.0668722	0.15888	0.0489498
-0.271312	-0.333262	0.217628	-0.541636	-0.191969	-0.464641	-0.220159	0.154704	-0.384881	-0.0757929	-0.134858	-0.165402	-0.0460816	0.11818	-0.0052621
-0.307801	-0.371341	0.181461	-0.511999	-0.183166	-0.437792	-0.180568	0.0638757	-0.399668	0.0455341	-0.173738	-0.187288	-0.0505372	0.0746204	-0.0283929
-0.31127	-0.369127	0.193085	-0.562893	-0.13732	-0.408302	-0.214541	0.0204218	-0.421039	0.0166525	-0.215563	-0.183147	-0.118756	-0.0783823	-0.108102
-0.333943	-0.376134	0.171998	-0.560204	-0.147053	-0.397496	-0.210111	0.00122182	-0.389687	0.0390783	-0.206759	-0.212044	-0.00077104	-0.164758	-0.23519
-0.342634	-0.370328	0.130674	-0.60189	-0.176874	-0.440178	-0.270054	0.0897082	-0.420224	0.0122142	-0.221091	-0.259234	-0.123769	-0.213827	-0.252776
-0.362858	-0.392758	0.0944609	-0.622878	-0.250865	-0.436958	-0.231351	0.1326	-0.447436	0.09166	-0.384365	-0.331107	-0.106142	-0.156244	-0.309501
-0.359302	-0.342817	0.0734482	-0.589715	-0.287071	-0.434644	-0.233856	0.159744	-0.512577	0.0916947	-0.429406	-0.380072	-0.201651	-0.148568	-0.270709
-0.381516	-0.367609	0.101959	-0.594014	-0.33135	-0.445629	-0.14997	0.12098	-0.565692	0.14906	-0.477726	-0.416382	-0.127448	-0.130354	-0.351142
-0.369184	-0.320406	0.0795591	-0.553658	-0.336245	-0.469518	-0.125301	0.0576922	-0.518333	0.105779	-0.317451	-0.417602	-0.0299247	-0.139609	-0.328635
-0.376591	-0.374808	0.0109449	-0.566255	-0.341562	-0.492404	-0.130976	-0.0449866	-0.541115	0.068737	-0.268356	-0.417955	0.0440701	-0.150097	-0.329443
-0.380104	-0.347838	-0.0600258	-0.488527	-0.3224	-0.50481	-0.132517	-0.126455	-0.452666	0.0118345	-0.210157	-0.382541	0.0999782	-0.131865	-0.257685
-0.376406	-0.364808	-0.0740284	-0.496313	-0.304307	-0.483217	-0.131794	-0.131851	-0.422316	-0.0378981	-0.184268	-0.393098	0.137137	-0.102442	-0.195294
-0.393883	-0.322171	-0.00651679	-0.496314	-0.324658	-0.528343	-0.103439	-0.0374138	-0.383395	-0.0182811	-0.227083	-0.377454	0.0916783	-0.0588101	-0.152285
-0.378225	-0.323305	0.0319559	-0.546662	-0.350918	-0.517749	-0.0639463	0.00943537	-0.410937	0.0268775	-0.211662	-0.321655	-0.00583212	-0.0843594	-0.168655
-0.382812	-0.364823	0.00718134	-0.517226	-0.366664	-0.54827	-0.0603328	0.0011848	-0.447849	0.0993026	-0.22858	-0.274772	0.0227326	-0.145155	-0.249535
-0.37823	-0.403369	-0.070486	-0.494461	-0.347474	-0.524885	-0.0604111	-0.0923474	-0.436388	0.079074	-0.236437	-0.262438	0.0174593	-0.224566	-0.278864
-0.377471	-0.385792	-0.134617	-0.451672	-0.36922	-0.545958	-0.0746506	-0.174223	-0.465917	0.0657886	-0.300978	-0.290966	0.128599	-0.185406	-0.288791
-0.38013	-0.371314	-0.121937	-0.443804	-0.410781	-0.557649	-0.0829729	-0.149677	-0.437781	0.0363409	-0.287478	-0.280442	0.0186156	-0.0974968	-0.116545
-0.370225	-0.388642	-0.101241	-0.465648	-0.449816	-0.628775	-0.137068	-0.0795675	-0.492409	0.0813417	-0.270932	-0.266402	0.0989236	0.088415	0.0487692

## Sheet: Coldplate Cluster 2 cold
0.205808	0.183409	0.014734	-0.02597	-0.11262	0.362342	0.187658	0.377879	0.255104	0.463422	0.662278
0.321693	0.242297	0.05075	0.032462	-0.08838	0.36712	0.178634	0.366175	0.286052	0.417495	0.651435
0.32876	0.217318	0.132256	-0.02465	-0.0866	0.336361	0.192172	0.360069	0.216291	0.414069	0.645886
0.39305	0.202678	0.108173	-0.03129	-0.08729	0.333041	0.232621	0.301911	0.218942	0.428376	0.648225
0.429099	0.191365	-0.01698	-0.06094	-0.08814	0.36932	0.288045	0.25133	0.150107	0.459582	0.730809
0.47053	0.223487	0.011675	-0.0432	-0.09546	0.403364	0.332105	0.234303	0.158672	0.424735	0.793189
0.45763	0.279234	0.012085	-0.08683	-0.09269	0.404052	0.430312	0.28894	0.136686	0.440646	0.853864
0.443249	0.300964	0.072415	-0.1103	-0.08122	0.389725	0.55703	0.33539	0.137717	0.464128	0.859167
0.437952	0.302379	0.083651	-0.11601	-0.03729	0.369159	0.627887	0.320809	0.192206	0.565355	0.858437
0.510341	0.3494	0.039265	-0.092	-0.03679	0.306769	0.638512	0.286571	0.212896	0.520162	0.842349
0.62879	0.383335	-0.04716	-0.09013	-0.04003	0.257905	0.563275	0.27685	0.25308	0.504453	0.778103
0.693934	0.457456	-0.19806	-0.07037	-0.09306	0.220554	0.547634	0.287011	0.219868	0.438119	0.752816
0.738621	0.465545	-0.30397	-0.09803	-0.08784	0.185488	0.47773	0.28518	0.235181	0.441064	0.678093
0.610358	0.431967	-0.21649	-0.07482	-0.11331	0.113892	0.480515	0.241073	0.229771	0.447979	0.744755
0.525098	0.375109	-0.19801	-0.04333	-0.10774	0.085745	0.409677	0.226267	0.203807	0.409987	0.786972
0.414974	0.355364	-0.09251	0.005177	-0.15722	0.12234	0.357282	0.188649	0.216287	0.406423	0.890208
0.465537	0.327483	0.0341	-0.02039	-0.15485	0.188747	0.273317	0.170313	0.227553	0.363497	0.883876
0.505732	0.279542	0.196352	-0.08261	-0.16959	0.217875	0.25073	0.189666	0.290685	0.359006	0.822496
0.568427	0.279213	0.083287	-0.1137	-0.16176	0.270096	0.286517	0.205032	0.334158	0.360037	0.729771
0.491679	0.263635	-0.06278	-0.07339	-0.17382	0.315657	0.312616	0.241492	0.314043	0.370457	0.666604
0.458349	0.319051	-0.11699	-0.02526	-0.18411	0.388554	0.300291	0.250146	0.339881	0.414658	0.644321
0.41989	0.336901	-0.0904	-0.00988	-0.21104	0.4434	0.261539	0.261254	0.346787	0.464143	0.651808
0.509165	0.348104	-0.13291	-0.03937	-0.2254	0.56441	0.261553	0.279183	0.353089	0.523504	0.629372
0.511286	0.363109	-0.25687	-0.0236	-0.23693	0.642133	0.326943	0.284217	0.323779	0.505909	0.617225
0.529504	0.437697	-0.09731	-0.00838	-0.24287	0.698359	0.423464	0.320854	0.348679	0.422045	0.612353
0.490555	0.484878	-0.07053	0.045252	-0.25187	0.72177	0.483792	0.350373	0.404775	0.440342	0.606184
0.514743	0.473149	0.138807	0.023006	-0.24649	0.780269	0.542997	0.345866	0.448378	0.503632	0.626245
0.43847	0.361213	-0.03088	0.01565	-0.24339	0.839205	0.548317	0.277586	0.404149	0.589225	0.624876
0.430804	0.302528	-0.02198	-0.01087	-0.22902	0.901741	0.594402	0.254057	0.346583	0.607376	0.638348
0.378976	0.282077	-0.15471	-0.03131	-0.24242	0.934296	0.62416	0.255864	0.288204	0.585054	0.622492
0.44513	0.264699	-0.02884	-0.05528	-0.21663	0.956335	0.739334	0.330624	0.271833	0.630976	0.658534
0.421504	0.276781	-0.02154	-0.03607	-0.20619	0.981667	0.842357	0.35815	0.274516	0.638374	0.703119
0.448215	0.300181	-0.07598	-0.00987	-0.16032	1.0351	0.964413	0.378745	0.316082	0.645324	0.753296
0.415355	0.353672	-0.0925	0.057588	-0.15987	1.13747	1.04944	0.381636	0.362482	0.634592	0.762022
0.420477	0.386827	-0.05815	0.02609	-0.17457	1.21269	1.07068	0.327652	0.423986	0.618954	0.755107
0.397188	0.347349	-0.033	0.014055	-0.18864	1.25127	1.03729	0.324483	0.39899	0.662841	0.714903
0.340307	0.313356	0.024863	-0.02811	-0.19396	1.26371	0.945068	0.328363	0.360273	0.693344	0.718802
0.336722	0.259102	0.021562	-0.02677	-0.17487	1.26609	0.993159	0.391219	0.307718	0.704175	0.722638
0.36677	0.29899	0.086097	0.018928	-0.17093	1.31034	1.01084	0.389728	0.27579	0.662948	0.704232
0.39716	0.338584	-0.00991	0.057747	-0.18366	1.34936	1.06647	0.349958	0.216634	0.658174	0.675529
0.373265	0.358337	-0.02371	0.104309	-0.13568	1.31363	1.01959	0.160488	0.18261	0.781994	0.668513
0.344854	0.391062	-0.05929	0.126829	-0.14131	1.31202	1.00098	0.118181	0.170444	0.777642	0.692055
0.282584	0.327971	-0.01238	0.140871	-0.12351	1.28676	0.966616	0.053033	0.158937	0.705954	0.699117
0.19577	0.321881	-0.0496	0.202291	-0.14558	1.35679	0.966626	0.11891	0.105992	0.557993	0.731795
0.144718	0.291753	0.031719	0.228733	-0.12915	1.34407	0.919176	0.075931	0.053099	0.533258	0.753691
0.165827	0.31853	0.117294	0.259157	-0.11648	1.35567	0.847987	0.124379	0.077992	0.535595	0.735617
0.209197	0.290227	0.203072	0.160345	-0.14189	1.38595	0.755637	0.178674	0.072323	0.521098	0.75978
0.197943	0.234722	0.16697	0.1106	-0.14463	1.42856	0.691536	0.171019	0.072736	0.504467	0.782756
0.210135	0.164131	0.031972	0.059093	-0.12237	1.43131	0.672237	0.168958	0.021878	0.472593	0.738402
0.225418	0.188909	-0.01148	0.028074	-0.11308	1.39487	0.570151	0.177281	0.063344	0.469543	0.694469
0.209971	0.151981	-0.02614	-0.05873	-0.10259	1.37676	0.572166	0.234948	0.059027	0.495756	0.656606
0.152292	0.141462	0.084627	-0.09774	-0.11476	1.36429	0.548952	0.278219	0.088591	0.522656	0.660153
0.053389	0.019634	0.145101	-0.08435	-0.11117	1.33696	0.586928	0.310523	0.013316	0.494268	0.609799
0.014441	-0.02469	0.247675	-0.04846	-0.12995	1.32845	0.606004	0.342673	0.042833	0.459604	0.57849
0.043675	0.011209	0.311248	-0.02988	-0.12328	1.32052	0.647738	0.34447	0.081923	0.460823	0.582649
0.089309	0.019942	0.356376	-0.05877	-0.1338	1.30159	0.692661	0.296292	0.127861	0.48609	0.594476
0.164254	0.038275	0.370253	-0.02881	-0.11256	1.24518	0.68734	0.25529	0.154224	0.550057	0.644373
0.128004	-0.06536	0.403577	-0.03774	-0.09636	1.22225	0.6805	0.245033	0.085248	0.553061	0.647974
0.154918	-0.03356	0.218449	0.015737	-0.04321	1.21161	0.636815	0.226686	0.135867	0.538377	0.64456
0.101011	-0.03826	0.013845	-5.9e-05	-0.03823	1.18189	0.575851	0.204292	0.101833	0.475103	0.535025
0.131328	0.05323	-0.08024	-0.01578	-0.03818	1.17227	0.512988	0.1504	0.105721	0.449008	0.514822
0.112057	-0.0144	-0.00487	0.000601	-0.0592	1.20517	0.42924	0.156088	0.053151	0.445178	0.44736
0.187245	-0.07168	0.174069	-0.02731	-0.04863	1.22588	0.41736	0.156536	0.016447	0.443221	0.426375
0.199169	-0.12626	0.115404	-0.03425	-0.02982	1.16936	0.318875	0.115672	0.05973	0.453816	0.409426
0.214844	-0.12024	0.14717	-0.09895	0.028317	1.09567	0.300849	0.070362	0.073545	0.432577	0.436472
0.129524	-0.14978	0.076955	-0.11331	0.093485	1.0705	0.233642	-0.00601	0.065511	0.460006	0.475891
0.047405	-0.21423	0.095173	-0.10035	0.163482	1.06093	0.215487	0.00712	-0.01097	0.46838	0.490065
-0.01395	-0.18787	0.025546	-0.06541	0.198895	1.04333	0.189034	-0.01081	-0.04608	0.48722	0.447375
-0.07946	-0.16827	0.069256	-0.05553	0.223328	0.977773	0.103313	-0.05029	-0.08833	0.479123	0.456326
-0.11601	-0.15109	-0.00771	-0.05786	0.205626	0.937075	0.088396	-0.06357	-0.09904	0.541712	0.432486
-0.1252	-0.15596	0.010623	-0.05602	0.163804	0.886318	0.025416	-0.0481	-0.11771	0.585974	0.438953
-0.1225	-0.10705	0.040049	-0.06171	0.121047	0.826378	-0.01668	-0.00828	-0.06268	0.590281	0.376735
-0.13054	-0.07081	0.06962	-0.04773	0.111205	0.783949	-0.12336	-0.03574	-0.07077	0.556164	0.359397
-0.08256	-0.08453	0.051586	-0.01139	0.118604	0.741852	-0.2381	-0.07276	-0.11794	0.556951	0.344144
-0.07439	-0.13567	-0.05116	0.054702	0.115993	0.75168	-0.34461	-0.14236	-0.14471	0.599116	0.359541
-0.07592	-0.19226	-0.03354	0.123345	0.09435	0.73167	-0.47243	-0.23497	-0.12954	0.540144	0.32842
-0.17135	-0.21623	-0.08293	0.156148	0.078176	0.782386	-0.49129	-0.29378	-0.06824	0.507619	0.25417
-0.17507	-0.27726	-0.14315	0.185276	0.04291	0.815343	-0.53771	-0.29421	-0.09168	0.475847	0.164851
-0.18335	-0.29394	-0.18465	0.247104	0.006608	0.877127	-0.53046	-0.30319	-0.04785	0.546072	0.119996
-0.12946	-0.37639	-0.2349	0.282025	-0.08446	0.875626	-0.61237	-0.34604	-0.03304	0.588477	0.159882
-0.02449	-0.44253	-0.30993	0.3423	-0.15014	0.884978	-0.68088	-0.37177	0.077391	0.591993	0.186627
0.118129	-0.48774	-0.28787	0.407784	-0.23764	0.902768	-0.73657	-0.37789	0.107388	0.561133	0.135614
0.155634	-0.5651	-0.27447	0.438884	-0.29862	0.904395	-0.76831	-0.37557	0.092572	0.559355	0.08992
0.162658	-0.58218	-0.32967	0.483012	-0.37484	0.915944	-0.79857	-0.37796	0.022992	0.536292	0.061148
0.109986	-0.64165	-0.4076	0.403031	-0.45101	0.871871	-0.89174	-0.3781	-0.00793	0.524329	0.054756
0.114537	-0.61003	-0.41971	0.337442	-0.51559	0.82598	-0.93859	-0.37814	0.051708	0.460618	0.059064
0.082231	-0.64844	-0.41547	0.233166	-0.58395	0.781373	-0.97044	-0.34071	0.078252	0.459641	0.064875
0.060746	-0.69694	-0.43051	0.16681	-0.65382	0.746045	-0.91077	-0.32912	0.024156	0.440251	0.090535
0.000735	-0.78814	-0.52898	0.021808	-0.70032	0.733991	-0.91996	-0.35891	-0.08489	0.431811	0.117702
-0.07146	-0.86432	-0.51293	-0.16508	-0.73494	0.674462	-0.87278	-0.49882	-0.21537	0.35641	0.134941
-0.04299	-0.91286	-0.53111	-0.30966	-0.74035	0.632415	-0.87026	-0.59104	-0.24079	0.298263	0.131426
0.034033	-0.8921	-0.57657	-0.41964	-0.76025	0.56493	-0.89816	-0.67755	-0.21894	0.233166	0.012705
0.150815	-0.87065	-0.65231	-0.54559	-0.77427	0.538107	-0.95019	-0.75103	-0.15917	0.206854	-0.12079
0.17165	-0.9087	-0.72598	-0.73701	-0.80607	0.533086	-1.04015	-0.85247	-0.14477	0.180988	-0.16629
0.183396	-0.97753	-0.71636	-0.91282	-0.79572	0.495735	-0.97909	-0.93598	-0.13517	0.14109	-0.1622
0.2162	-1.01708	-0.78422	-1.02927	-0.81493	0.442721	-0.97393	-0.98916	-0.04588	0.121471	-0.13164
0.231255	-1.02802	-0.86446	-1.12138	-0.8336	0.359398	-0.90042	-1.02111	-0.01627	0.078783	-0.19234
0.265964	-1.03687	-0.91194	-1.15074	-0.86056	0.35179	-0.92976	-1.056	0.039124	0.073425	-0.3147
0.235784	-1.07356	-0.78685	-1.16646	-0.87874	0.316792	-0.94991	-1.08336	0.037949	0.065591	-0.37581
0.221681	-1.14665	-0.70932	-1.20979	-0.88202	0.242147	-1.05141	-1.14576	0.056648	0.095499	-0.37163
0.222037	-1.20804	-0.7175	-1.27101	-0.93475	0.159605	-1.08392	-1.19071	0.022021	0.129481	-0.36426
0.245919	-1.20641	-0.76213	-1.27632	-0.95472	0.094472	-1.11679	-1.28145	0.016884	0.191144	-0.44343
0.301081	-1.13863	-0.71869	-1.25821	-0.99786	0.089252	-1.08317	-1.35966	0.023752	0.218572	-0.49891
0.311976	-1.11188	-0.60946	-1.23223	-1.05881	0.043469	-1.16027	-1.43433	0.079278	0.196188	-0.54982
0.319908	-1.09767	-0.64612	-1.26882	-1.12794	0.030165	-1.18116	-1.497	0.109226	0.163005	-0.60543
0.338231	-1.09511	-0.69251	-1.26616	-1.19249	0.053931	-1.18241	-1.5097	0.17486	0.112559	-0.78091
0.336107	-1.03964	-0.73526	-1.19671	-1.19747	0.078673	-1.15085	-1.56439	0.205175	0.131046	-0.90477
0.285979	-1.06264	-0.57742	-1.20389	-1.23497	0.068137	-1.10212	-1.56913	0.162218	0.111365	-1.0171
0.326564	-1.0565	-0.51385	-1.13314	-1.25838	0.084217	-1.12451	-1.60105	0.19196	0.090023	-1.08657
0.351385	-1.02153	-0.31144	-1.16096	-1.29995	0.10756	-1.10114	-1.57426	0.187356	0.032949	-1.13333
0.425449	-0.94953	-0.15498	-1.06861	-1.30559	0.192328	-1.08541	-1.553	0.229105	0.006809	-1.11453
0.397186	-0.89088	0.102253	-1.08653	-1.32997	0.179893	-1.07734	-1.54184	0.151827	0.002495	-1.09406
0.394689	-0.90854	0.134812	-1.09737	-1.36456	0.190902	-1.03404	-1.53374	0.091554	-0.01259	-1.0612
0.393693	-0.9158	0.178608	-1.118	-1.38193	0.144038	-1.03847	-1.51692	0.058507	-0.04026	-1.10396
0.394483	-0.90915	0.105839	-1.1287	-1.38074	0.10711	-1.00553	-1.52037	0.061678	-0.10013	-1.08163
0.369253	-0.90717	0.153551	-1.06217	-1.35045	0.033589	-1.00306	-1.50479	0.036884	-0.09358	-1.10509
0.355978	-0.97492	0.114382	-1.00954	-1.35071	-0.02761	-0.92888	-1.47957	-0.01248	-0.10891	-1.08538
0.321835	-1.05233	0.019453	-0.95012	-1.31445	-0.07334	-0.87443	-1.46438	-0.08267	-0.06441	-1.08828
0.382683	-1.13394	0.029687	-0.88723	-1.30454	-0.09558	-0.83146	-1.48379	-0.14062	-0.03073	-1.0636
0.434533	-1.04511	-0.04279	-0.83157	-1.28169	-0.11928	-0.83484	-1.53542	-0.17089	-0.04727	-1.00942
0.454193	-1.02579	-0.02173	-0.7688	-1.28416	-0.13947	-0.84817	-1.53751	-0.19818	-0.04686	-0.97515
0.465346	-0.98138	-0.02481	-0.69085	-1.27388	-0.14943	-0.83177	-1.54175	-0.16719	-0.0575	-0.9458
0.456045	-1.00602	0.005851	-0.65374	-1.25201	-0.14691	-0.78468	-1.49411	-0.15104	-0.00693	-0.95992
0.48552	-1.02343	0.046745	-0.60648	-1.24222	-0.10867	-0.71432	-1.49152	-0.19613	0.005271	-0.99962
0.500631	-0.9685	0.087028	-0.5546	-1.23707	-0.12182	-0.67525	-1.46423	-0.24873	-0.03541	-0.98315
0.506759	-0.9569	0.150885	-0.49822	-1.25978	-0.10389	-0.67235	-1.4286	-0.2881	-0.08411	-0.97717
0.508613	-0.9305	0.100663	-0.46079	-1.26103	-0.16181	-0.68057	-1.39964	-0.2625	-0.13471	-0.95431
0.453302	-0.98177	0.069765	-0.44044	-1.26236	-0.20535	-0.7086	-1.37737	-0.28689	-0.17355	-0.93407
0.420555	-0.92005	0.063784	-0.41435	-1.23716	-0.24004	-0.71893	-1.41515	-0.29315	-0.2083	-0.93262
0.387174	-0.8516	0.195257	-0.40803	-1.22068	-0.27582	-0.72003	-1.3726	-0.31862	-0.22759	-0.93832
0.353441	-0.74869	0.245484	-0.46098	-1.20976	-0.26688	-0.73924	-1.32925	-0.37974	-0.21436	-0.9631
0.281126	-0.73376	0.211445	-0.5269	-1.20348	-0.30714	-0.76731	-1.27675	-0.46656	-0.18558	-0.95913
0.231891	-0.72459	0.209092	-0.56936	-1.2026	-0.26511	-0.77612	-1.21645	-0.52078	-0.19504	-0.95762
0.200323	-0.66856	0.139082	-0.61405	-1.19276	-0.25809	-0.73153	-1.17776	-0.49474	-0.17765	-1.00973
0.208442	-0.63015	0.252362	-0.62005	-1.2012	-0.25324	-0.72976	-1.1288	-0.44217	-0.22096	-0.9903
0.207971	-0.5724	0.227591	-0.63191	-1.18828	-0.26304	-0.73502	-1.15623	-0.4094	-0.21573	-0.99353
0.223618	-0.58184	0.307768	-0.67264	-1.17756	-0.27404	-0.79096	-1.1437	-0.41658	-0.25651	-0.96579
0.160546	-0.59601	0.178112	-0.68155	-1.16096	-0.25801	-0.78331	-1.12477	-0.45668	-0.25042	-1.03644
0.146833	-0.57146	0.212511	-0.6721	-1.16399	-0.31494	-0.80822	-1.10312	-0.4946	-0.25379	-1.0789
0.137451	-0.53529	0.150795	-0.60182	-1.17601	-0.33562	-0.73178	-1.12912	-0.4721	-0.23933	-1.09545
0.207477	-0.48076	0.324908	-0.62377	-1.16841	-0.38857	-0.77363	-1.16157	-0.46879	-0.21501	-1.06415
0.239623	-0.48336	0.321255	-0.61695	-1.13893	-0.36409	-0.79193	-1.12272	-0.46873	-0.21497	-1.00644
0.275318	-0.4994	0.395893	-0.62464	-1.09334	-0.39408	-0.86809	-1.07002	-0.48779	-0.20681	-0.9567
0.288357	-0.52511	0.350029	-0.56047	-1.06184	-0.39239	-0.81844	-1.07042	-0.47905	-0.21967	-0.90101
0.280242	-0.51736	0.319267	-0.5444	-1.04092	-0.4172	-0.81956	-1.06433	-0.44654	-0.21749	-0.89636
0.23717	-0.54326	0.397706	-0.52764	-1.02239	-0.41148	-0.78342	-1.05692	-0.45425	-0.25668	-0.88216
0.198811	-0.56624	0.315662	-0.51312	-1.00703	-0.42251	-0.80087	-1.01386	-0.5213	-0.25352	-0.87974
0.192743	-0.60029	0.312921	-0.45672	-1.00593	-0.46573	-0.76997	-1.05919	-0.58277	-0.25121	-0.84465
0.225073	-0.60589	0.199934	-0.4324	-0.98103	-0.50472	-0.74559	-1.06128	-0.68141	-0.23555	-0.81988
0.241626	-0.62372	0.243787	-0.40496	-0.95875	-0.51568	-0.68316	-1.03988	-0.70596	-0.26199	-0.79993
0.208917	-0.58724	0.207055	-0.44767	-0.93067	-0.51254	-0.57423	-0.95884	-0.76062	-0.27226	-0.78233
0.140189	-0.53854	0.182058	-0.44247	-0.91696	-0.51645	-0.52266	-0.93014	-0.77411	-0.28239	-0.7836
0.070534	-0.48841	0.163044	-0.4477	-0.91097	-0.53997	-0.50181	-0.88896	-0.7962	-0.28155	-0.86941
-0.00701	-0.47966	0.19356	-0.47666	-0.9016	-0.5636	-0.53145	-0.88752	-0.77743	-0.30038	-0.85742
-0.0667	-0.47478	0.236348	-0.5387	-0.89238	-0.57746	-0.53786	-0.86203	-0.73005	-0.31321	-0.81825
-0.07623	-0.44872	0.312133	-0.58608	-0.8649	-0.63844	-0.54688	-0.87451	-0.7254	-0.31438	-0.76964
-0.05719	-0.43938	0.302588	-0.59865	-0.84749	-0.66792	-0.54684	-0.82939	-0.74985	-0.34984	-0.79903
0.011678	-0.44648	0.289043	-0.58356	-0.83511	-0.7016	-0.58642	-0.83515	-0.76711	-0.40547	-0.87599
0.060197	-0.44166	0.264403	-0.59395	-0.8049	-0.69885	-0.58745	-0.83833	-0.73056	-0.43102	-0.90161
0.077033	-0.42785	0.284945	-0.58301	-0.77865	-0.71842	-0.58216	-0.91187	-0.70726	-0.43238	-0.95226
0.034612	-0.41376	0.185756	-0.55352	-0.73609	-0.71125	-0.55845	-0.90237	-0.74896	-0.39898	-0.95317
-0.01349	-0.43367	0.091421	-0.55109	-0.7512	-0.69605	-0.57296	-0.87884	-0.81401	-0.39359	-0.95321
-0.00597	-0.44779	0.130639	-0.5167	-0.75932	-0.67478	-0.6061	-0.80572	-0.87461	-0.39576	-0.94829
0.014971	-0.41595	0.208446	-0.5231	-0.77739	-0.68635	-0.6089	-0.76904	-0.82384	-0.42577	-0.95594
0.004886	-0.37151	0.261387	-0.55725	-0.78032	-0.68664	-0.56428	-0.73083	-0.79763	-0.47405	-0.9511
0.050389	-0.36034	0.150872	-0.61775	-0.76494	-0.68504	-0.52354	-0.74337	-0.72196	-0.49516	-0.90057
0.003774	-0.39309	-0.0085	-0.67374	-0.77036	-0.68409	-0.49913	-0.74373	-0.73949	-0.48952	-0.85212
-0.01452	-0.385	-0.06812	-0.62695	-0.73837	-0.70187	-0.49472	-0.70499	-0.69367	-0.47051	-0.8479
-0.05276	-0.4261	-0.11713	-0.57913	-0.72722	-0.7051	-0.43797	-0.64929	-0.71224	-0.44282	-0.8829
0.024253	-0.42842	0.03993	-0.54408	-0.72483	-0.7179	-0.39059	-0.63678	-0.69888	-0.46625	-0.92097
0.061353	-0.51815	0.030073	-0.6079	-0.71401	-0.69571	-0.37877	-0.64075	-0.70407	-0.47408	-0.84954
0.077256	-0.49126	0.065845	-0.69999	-0.69682	-0.68343	-0.43447	-0.65025	-0.67515	-0.5424	-0.80567
0.090887	-0.48811	-0.05516	-0.7716	-0.65563	-0.66543	-0.44728	-0.64996	-0.64305	-0.5188	-0.79384
0.106372	-0.43167	-0.04224	-0.74492	-0.62596	-0.67282	-0.45891	-0.65835	-0.65621	-0.53862	-0.82987
0.070665	-0.44839	-0.12633	-0.71458	-0.5864	-0.71653	-0.47264	-0.69094	-0.64373	-0.49341	-0.89047
0.01823	-0.49793	-0.18813	-0.66902	-0.55461	-0.72355	-0.50156	-0.69569	-0.6932	-0.56044	-0.88347
0.040563	-0.49297	-0.1426	-0.65922	-0.53663	-0.78544	-0.53625	-0.73845	-0.64863	-0.60774	-0.92669
0.091672	-0.52971	-0.03654	-0.65496	-0.52513	-0.77885	-0.50659	-0.7332	-0.70075	-0.65391	-0.92478
0.120386	-0.54771	0.023139	-0.66981	-0.50099	-0.81582	-0.48724	-0.73552	-0.72849	-0.63742	-0.93462
0.118149	-0.62174	-0.087	-0.70158	-0.48402	-0.81292	-0.48502	-0.70305	-0.80843	-0.61299	-0.89039
0.138053	-0.64439	-0.12149	-0.70368	-0.46419	-0.8454	-0.53869	-0.70948	-0.85226	-0.62769	-0.89974
0.13726	-0.6564	-0.12806	-0.68729	-0.47293	-0.84063	-0.60407	-0.7477	-0.86951	-0.66356	-0.95865
0.062907	-0.65724	-0.11239	-0.60795	-0.46971	-0.85544	-0.61055	-0.81706	-0.91342	-0.73247	-1.01445
-0.03463	-0.65029	-0.1457	-0.54102	-0.4632	-0.88358	-0.58394	-0.83166	-0.93541	-0.75591	-1.04585
-0.16746	-0.59215	-0.14143	-0.4481	-0.46176	-0.89332	-0.55578	-0.78145	-0.93655	-0.79362	-1.09039
-0.22384	-0.59247	-0.28619	-0.49368	-0.4711	-0.87636	-0.5258	-0.72163	-0.93364	-0.78857	-1.16162
-0.27496	-0.54024	-0.25582	-0.53692	-0.46862	-0.8264	-0.51501	-0.69961	-0.89001	-0.81017	-1.23589
-0.27132	-0.57378	-0.3783	-0.58299	-0.4514	-0.80011	-0.4811	-0.70102	-0.86992	-0.83362	-1.22614
-0.27162	-0.52564	-0.3482	-0.56157	-0.39669	-0.80581	-0.47701	-0.72309	-0.82078	-0.82059	-1.24379
-0.25782	-0.4911	-0.50969	-0.54728	-0.3708	-0.8432	-0.46208	-0.71253	-0.7825	-0.83851	-1.182
-0.21303	-0.40736	-0.41878	-0.5378	-0.35558	-0.90645	-0.47023	-0.70029	-0.73333	-0.82157	-1.15843
-0.24573	-0.37458	-0.5159	-0.5003	-0.33861	-0.95473	-0.46156	-0.69807	-0.75266	-0.8603	-1.05275
-0.32946	-0.36644	-0.56501	-0.46485	-0.32359	-1.00946	-0.45164	-0.71895	-0.77982	-0.8726	-1.02898
-0.46998	-0.38332	-0.72486	-0.44682	-0.27115	-1.03531	-0.4415	-0.74356	-0.88415	-0.8512	-1.02198
-0.52489	-0.33033	-0.74707	-0.4321	-0.23987	-1.06199	-0.46284	-0.72438	-0.92219	-0.85939	-1.03084
-0.53832	-0.29483	-0.80789	-0.44085	-0.19825	-1.07862	-0.49108	-0.78128	-0.99394	-0.85449	-0.9711
-0.52693	-0.20118	-0.85088	-0.44323	-0.16046	-1.06031	-0.49966	-0.83486	-0.97497	-0.85548	-0.95057
-0.51706	-0.15165	-0.90793	-0.47611	-0.13636	-1.01463	-0.4678	-0.81965	-0.98048	-0.82635	-0.90517
-0.5545	-0.1262	-1.00757	-0.4447	-0.13279	-0.97563	-0.48128	-0.76527	-0.99121	-0.83681	-0.91939
-0.57286	-0.09289	-0.94634	-0.41138	-0.17068	-0.99022	-0.50098	-0.70044	-1.00451	-0.85959	-0.83342
-0.55591	-0.04035	-0.87782	-0.38418	-0.19097	-1.00878	-0.5521	-0.69055	-1.01321	-0.90491	-0.83913
-0.51359	0.033125	-0.67352	-0.38737	-0.23992	-1.04249	-0.59105	-0.65387	-0.96919	-0.94421	-0.77694
-0.44729	0.050498	-0.67418	-0.39737	-0.2676	-1.02029	-0.60885	-0.66037	-0.90074	-0.98682	-0.80183
-0.4204	0.01951	-0.73621	-0.35213	-0.28947	-0.97472	-0.64705	-0.64943	-0.87081	-0.96714	-0.85167
-0.39504	0.005641	-0.77907	-0.28671	-0.27925	-0.89241	-0.61685	-0.61978	-0.86857	-0.96236	-0.91885
-0.46244	-0.01274	-0.89647	-0.25678	-0.2796	-0.88177	-0.64018	-0.58342	-0.87382	-0.99501	-0.94544
-0.58816	-0.00261	-0.89273	-0.26044	-0.29736	-0.90641	-0.64765	-0.60705	-0.89505	-1.01287	-0.8518
-0.66322	0.012751	-0.79804	-0.21253	-0.28856	-0.91998	-0.58641	-0.64339	-0.92321	-1.03856	-0.80792
-0.68384	0.039326	-0.6521	-0.2084	-0.28064	-0.92989	-0.5954	-0.62628	-0.96488	-0.9967	-0.776
-0.74861	0.045747	-0.55007	-0.21785	-0.2662	-0.95584	-0.52219	-0.58165	-1.02141	-1.02005	-0.81759
-0.83036	0.027445	-0.6635	-0.28402	-0.27418	-0.97559	-0.58174	-0.56981	-1.06002	-0.99191	-0.77635
-0.90794	-0.05885	-0.82257	-0.32556	-0.28212	-0.97612	-0.58629	-0.57156	-1.13554	-0.99043	-0.7422
-0.8694	-0.0917	-0.78296	-0.26621	-0.26869	-0.90932	-0.61858	-0.52489	-1.13275	-0.93447	-0.6875
-0.84797	-0.12173	-0.67105	-0.25462	-0.25719	-0.89395	-0.61378	-0.466	-1.16051	-0.93737	-0.70817
-0.83662	-0.11017	-0.5084	-0.22071	-0.25325	-0.84119	-0.57863	-0.3938	-1.12684	-0.94551	-0.68367
-0.86238	-0.08378	-0.50925	-0.27435	-0.29016	-0.80568	-0.54413	-0.39848	-1.07441	-0.97545	-0.66235
-0.93634	-0.07929	-0.66586	-0.29978	-0.31382	-0.76097	-0.52903	-0.38353	-1.09136	-0.99509	-0.68278
-0.98323	-0.02747	-0.6845	-0.30373	-0.34864	-0.73121	-0.52514	-0.38885	-1.11258	-0.96997	-0.69198
-0.98338	0.025042	-0.7879	-0.27416	-0.36706	-0.73509	-0.53706	-0.36538	-1.15546	-0.95113	-0.71911
-0.89754	0.059351	-0.77809	-0.22084	-0.40645	-0.74198	-0.53117	-0.35464	-1.11236	-0.9158	-0.6898
-0.82933	0.103544	-0.75445	-0.15895	-0.39911	-0.75493	-0.51748	-0.3835	-1.1	-0.93363	-0.75485
-0.85769	0.036276	-0.74941	-0.14624	-0.38965	-0.78786	-0.47651	-0.42623	-1.11839	-0.88435	-0.72456
-0.89975	0.086497	-0.75386	-0.13853	-0.38152	-0.82366	-0.43627	-0.40417	-1.11836	-0.8558	-0.72491
-0.9353	0.078892	-0.82681	-0.1369	-0.35966	-0.88075	-0.40522	-0.40812	-1.10458	-0.84217	-0.68782
-0.96154	0.174047	-0.87824	-0.0713	-0.33193	-0.93749	-0.4134	-0.41044	-1.05257	-0.89766	-0.75478
-1.03549	0.084432	-0.69684	-0.05062	-0.28721	-0.96883	-0.43899	-0.52184	-1.05594	-0.90806	-0.77317
-1.04988	0.054383	-0.71259	-0.08662	-0.28275	-0.98083	-0.47132	-0.55481	-1.09147	-0.94104	-0.77343
-0.95709	-0.08377	-0.64387	-0.19333	-0.28627	-0.96033	-0.48848	-0.54223	-1.13199	-0.9467	-0.79617
-0.91926	-0.06168	-0.79679	-0.2456	-0.27517	-0.91014	-0.45752	-0.48566	-1.15255	-0.95391	-0.82161
-0.99864	-0.10227	-0.78184	-0.25831	-0.23818	-0.85027	-0.45607	-0.42192	-1.14901	-0.96977	-0.85673
-1.08942	-0.07614	-0.73719	-0.22543	-0.21398	-0.81874	-0.4516	-0.4033	-1.19315	-1.00708	-0.8409
-1.07506	-0.13572	-0.58939	-0.24495	-0.20324	-0.8305	-0.45873	-0.36292	-1.2514	-1.02006	-0.83137
-0.93355	-0.12269	-0.55994	-0.26591	-0.21505	-0.86122	-0.41988	-0.38202	-1.26622	-0.99156	-0.81994
-0.83284	-0.10601	-0.55183	-0.32865	-0.19513	-0.88395	-0.44435	-0.41328	-1.23128	-0.98637	-0.80117
-0.70323	-0.07595	-0.65323	-0.3918	-0.18047	-0.87267	-0.4924	-0.38705	-1.15666	-1.00051	-0.75013
-0.69069	-0.12717	-0.67999	-0.40163	-0.1303	-0.8544	-0.53671	-0.38	-1.18353	-1.01556	-0.74056
-0.63796	-0.16204	-0.65091	-0.39445	-0.0967	-0.83118	-0.54029	-0.34575	-1.19134	-1.03668	-0.73425
-0.67238	-0.15633	-0.69316	-0.37395	-0.05743	-0.8171	-0.50024	-0.31176	-1.20813	-1.09344	-0.76745
-0.62017	-0.0953	-0.65299	-0.34378	-0.07511	-0.80891	-0.44078	-0.21672	-1.21699	-1.10139	-0.69913
-0.65414	-0.06555	-0.67272	-0.35489	-0.12076	-0.82324	-0.43607	-0.1477	-1.20494	-1.13945	-0.69819
-0.57947	-0.0347	-0.55474	-0.31793	-0.15396	-0.86823	-0.4759	-0.17263	-1.15896	-1.11675	-0.69756
-0.43879	-0.01655	-0.49624	-0.30592	-0.14762	-0.91909	-0.56619	-0.22238	-1.05182	-1.17674	-0.76984
-0.28104	-0.01577	-0.47735	-0.23908	-0.13806	-0.90472	-0.57911	-0.2421	-1.00576	-1.15031	-0.69887
-0.14737	0.044638	-0.5108	-0.16528	-0.15205	-0.8888	-0.58959	-0.19167	-0.95611	-1.10736	-0.71579
-0.10641	0.132792	-0.58547	-0.11827	-0.17016	-0.83846	-0.58779	-0.19021	-0.8841	-1.05548	-0.69667
-0.07632	0.223397	-0.60299	-0.01942	-0.16775	-0.79104	-0.61272	-0.17467	-0.82831	-0.9961	-0.67561
-0.05257	0.250207	-0.59217	-0.01959	-0.16147	-0.74931	-0.66768	-0.15253	-0.7697	-1.01395	-0.60466
-0.02868	0.24938	-0.52951	-0.01633	-0.15526	-0.71969	-0.70204	-0.04013	-0.75805	-1.02363	-0.57548
-0.03552	0.205147	-0.58273	-0.11369	-0.16351	-0.73272	-0.74189	0.023513	-0.76041	-1.06196	-0.59815
-0.06326	0.131194	-0.64025	-0.15839	-0.15044	-0.72747	-0.72885	0.024599	-0.81361	-1.04496	-0.61018
-0.12318	0.04242	-0.67718	-0.21944	-0.13035	-0.73724	-0.74223	-0.06252	-0.8183	-1.07951	-0.71047
-0.20703	-0.0107	-0.73225	-0.27127	-0.09503	-0.76629	-0.7695	-0.09114	-0.81275	-1.14656	-0.75534
-0.23167	0.002293	-0.70226	-0.30858	-0.0744	-0.77321	-0.84309	-0.13112	-0.77979	-1.26466	-0.71758
-0.27483	-0.01973	-0.78032	-0.32331	-0.09459	-0.80543	-0.87552	-0.13363	-0.78018	-1.35211	-0.56793
-0.18178	0.001123	-0.68827	-0.32884	-0.09846	-0.75752	-0.86256	-0.17104	-0.75144	-1.3228	-0.51175
-0.13103	0.024136	-0.69039	-0.33726	-0.12137	-0.73894	-0.81997	-0.10869	-0.70489	-1.29534	-0.51305
-0.08568	0.09051	-0.59357	-0.35701	-0.12106	-0.69772	-0.80708	-0.05841	-0.67375	-1.21759	-0.48987
-0.12417	0.131622	-0.60672	-0.34617	-0.135	-0.66501	-0.84206	-0.01993	-0.60998	-1.22857	-0.44587
-0.26253	0.084742	-0.64569	-0.36445	-0.10784	-0.65036	-0.85311	-0.06491	-0.64868	-1.21105	-0.3931
-0.3369	0.099885	-0.61006	-0.38048	-0.07423	-0.63538	-0.87103	-0.08545	-0.69186	-1.21109	-0.34587
-0.38931	0.073657	-0.61757	-0.37796	-0.0627	-0.63504	-0.87755	-0.07166	-0.75692	-1.22935	-0.34473
-0.36634	0.13269	-0.5996	-0.34452	-0.09025	-0.61065	-0.84514	-0.06826	-0.76766	-1.22938	-0.37373
-0.31902	0.116495	-0.77426	-0.299	-0.09971	-0.58773	-0.8541	-0.04141	-0.74761	-1.22113	-0.36566
-0.18325	0.135703	-0.67792	-0.29909	-0.10563	-0.59611	-0.81434	-0.01952	-0.68624	-1.20604	-0.34633
-0.09837	0.087534	-0.69602	-0.32014	-0.09903	-0.56575	-0.86418	0.045199	-0.65557	-1.21031	-0.25564
0.003778	0.064229	-0.646	-0.32036	-0.11244	-0.52717	-0.84703	0.071105	-0.59851	-1.21125	-0.26742
0.049098	0.032105	-0.83002	-0.34278	-0.11065	-0.44649	-0.83963	0.080109	-0.56865	-1.1974	-0.26348
0.129841	0.07529	-0.88435	-0.35477	-0.12701	-0.4311	-0.79671	0.049197	-0.49085	-1.16132	-0.2908
0.105699	0.065644	-0.90601	-0.35906	-0.15939	-0.42338	-0.73887	0.030709	-0.47396	-1.14124	-0.24485
0.066134	0.069106	-0.88194	-0.2863	-0.20567	-0.42903	-0.68068	0.037745	-0.48646	-1.15939	-0.20918
0.014122	0.003237	-0.80517	-0.27767	-0.24301	-0.39084	-0.61174	0.081222	-0.47394	-1.14285	-0.16891
0.082415	-0.02355	-0.81187	-0.27962	-0.22684	-0.33646	-0.57725	0.121833	-0.45809	-1.10268	-0.19274
0.105549	-0.00689	-0.72774	-0.34715	-0.2215	-0.33036	-0.62017	0.14359	-0.37017	-1.04317	-0.15472
0.130385	0.004612	-0.74376	-0.34621	-0.19515	-0.33133	-0.62695	0.174652	-0.36148	-1.07325	-0.1553
0.13552	0.062845	-0.53532	-0.3785	-0.18668	-0.39401	-0.65392	0.190555	-0.31904	-1.15574	-0.12602
0.196302	0.067906	-0.50077	-0.39272	-0.15151	-0.4134	-0.64485	0.179937	-0.37594	-1.21487	-0.14618
0.237375	0.11392	-0.39753	-0.38055	-0.11024	-0.39975	-0.63505	0.139721	-0.3619	-1.20938	-0.11085
0.151622	0.103449	-0.52996	-0.32673	-0.10127	-0.34093	-0.53612	0.135784	-0.4152	-1.12217	-0.06511
0.026411	0.099034	-0.52585	-0.28833	-0.0904	-0.29715	-0.45113	0.168011	-0.46038	-1.03096	-0.05321
-0.10138	0.029404	-0.632	-0.30425	-0.08188	-0.30783	-0.41351	0.20989	-0.57767	-0.93902	-0.048
-0.05198	0.026657	-0.59926	-0.35932	-0.04701	-0.31198	-0.42271	0.101131	-0.59288	-0.85701	-0.00849
-0.04777	0.039904	-0.64558	-0.31371	-0.00336	-0.31602	-0.35994	0.110056	-0.62402	-0.8438	0.031876
-0.05429	0.105355	-0.56028	-0.23952	0.024297	-0.31466	-0.27132	0.066268	-0.59969	-0.84689	0.048056
-0.11817	0.119222	-0.52279	-0.18993	0.066007	-0.30076	-0.16521	0.139216	-0.63353	-0.86664	0.0615
-0.15457	0.182949	-0.56042	-0.17702	0.084025	-0.26083	-0.0876	0.104327	-0.61713	-0.7885	0.059004
-0.12815	0.205069	-0.69847	-0.13792	0.132145	-0.20954	-0.06192	0.141787	-0.62267	-0.77553	0.041638
-0.1348	0.212744	-0.72763	-0.09171	0.153061	-0.1577	-0.03812	0.199071	-0.62755	-0.78251	-0.02048
-0.04505	0.203006	-0.74147	-0.07784	0.18252	-0.13045	-0.01794	0.18754	-0.56634	-0.81737	0.021561
0.023771	0.186119	-0.70418	-0.06705	0.182259	-0.0764	0.016924	0.177579	-0.51172	-0.79329	0.01735
0.051698	0.231724	-0.69982	-0.08662	0.190274	-0.03019	0.067291	0.145248	-0.46475	-0.75023	-0.03389
0.022673	0.185679	-0.49737	-0.11401	0.210072	0.019317	0.074541	0.216051	-0.51987	-0.7286	-0.05961
-0.07499	0.180062	-0.21369	-0.13712	0.239279	0.039393	0.094274	0.229721	-0.5821	-0.72223	-0.03599
-0.11209	0.207227	-0.03143	-0.06745	0.286718	0.046933	0.074449	0.275332	-0.58365	-0.72839	0.017774
-0.19139	0.26187	0.211839	-0.03837	0.33623	0.069936	0.074225	0.269992	-0.58184	-0.73313	-0.00043
-0.27784	0.244579	0.49319	-0.071	0.375093	0.06461	0.098102	0.24817	-0.56857	-0.68518	0.103659
-0.35526	0.18373	0.639878	-0.11689	0.402359	0.095694	0.136146	0.223078	-0.60973	-0.68503	0.344151
-0.33622	0.166255	0.64871	-0.11608	0.420358	0.140367	0.193018	0.193118	-0.62835	-0.67363	0.593747
-0.29335	0.115204	0.540643	-0.09871	0.454815	0.195432	0.23806	0.186346	-0.64486	-0.68913	0.726763
-0.25064	0.038127	0.771242	-0.0884	0.469454	0.190533	0.275435	0.180537	-0.64892	-0.6476	0.703407
-0.25533	-0.05572	0.823458	-0.01121	0.503175	0.161793	0.292606	0.177494	-0.59904	-0.62069	0.671761

## Sheet: Coldplate Cluster 2 control
0.0307296	0.198159	-0.0469956	0.686562	0.933191	0.374492	0.227826	0.280011	0.332779	0.656884	0.405026
0.0329444	0.27433	-0.0933426	0.731305	0.93097	0.392299	0.183701	0.253662	0.36309	0.697574	0.457194
0.0234662	0.298432	-0.109819	0.751614	0.906575	0.413071	0.216378	0.224468	0.372662	0.742915	0.436903
0.0397912	0.316684	-0.0507877	0.73551	0.872029	0.458697	0.257009	0.239372	0.380213	0.681045	0.388402
0.038349	0.371644	-0.0678971	0.757009	0.853428	0.512988	0.281843	0.227564	0.363944	0.742809	0.301188
0.0539946	0.434308	-0.0406504	0.79646	0.832773	0.581954	0.291028	0.224248	0.356333	0.784161	0.268451
0.0224574	0.481225	-0.0526906	0.837839	0.830122	0.655566	0.322475	0.216781	0.311419	0.832582	0.22756
-0.0092638	0.49302	-0.0161171	0.827859	0.812812	0.716023	0.323184	0.232489	0.313164	0.849455	0.171394
0.0236073	0.588744	-0.0648843	0.851708	0.789148	0.747375	0.348176	0.228018	0.329592	0.840514	0.214329
0.0293581	0.613703	-0.12136	0.852297	0.778764	0.772419	0.372023	0.214368	0.349422	0.884811	0.26075
0.0287009	0.593344	-0.114073	0.843769	0.767229	0.75221	0.399175	0.223026	0.375582	0.876877	0.329174
0.0386582	0.553635	-0.037937	0.844324	0.76494	0.736267	0.40402	0.205622	0.455079	0.896137	0.329954
0.0215059	0.511325	-0.0811117	0.764736	0.754208	0.736635	0.414591	0.214971	0.480788	0.900957	0.326319
0.0389888	0.435088	-0.108088	0.752964	0.741118	0.75861	0.39435	0.197192	0.468087	0.908716	0.329985
0.0247798	0.347736	-0.1526	0.70739	0.725787	0.79924	0.413011	0.216939	0.380058	0.929238	0.32822
-0.00824065	0.234523	-0.0649108	0.716846	0.695925	0.818857	0.472476	0.226523	0.366351	0.942265	0.3353
-0.0105355	0.203482	0.00617559	0.634099	0.658323	0.829749	0.544162	0.28329	0.337302	0.917113	0.353903
-0.0672754	0.168005	-0.00282912	0.528028	0.627344	0.824083	0.542858	0.268496	0.378276	0.87177	0.340405
-0.0758249	0.184684	-0.0730149	0.466286	0.610155	0.821388	0.546171	0.235993	0.359893	0.843836	0.319793
-0.122002	0.206304	-0.0682481	0.424536	0.58112	0.8294	0.558398	0.164472	0.366821	0.877001	0.313124
-0.130962	0.206148	-0.0802336	0.440869	0.563828	0.850197	0.605337	0.18939	0.389487	0.946786	0.29712
-0.106327	0.224952	0.00168935	0.507301	0.52762	0.857411	0.57591	0.214801	0.426385	0.999096	0.337205
-0.124554	0.173534	-0.00932328	0.602026	0.510075	0.905329	0.533287	0.28209	0.440929	0.986631	0.286153
-0.0808108	0.158588	0.051563	0.679991	0.474815	0.926613	0.467395	0.264381	0.420802	0.942381	0.271839
-0.10321	0.197969	0.0390268	0.674327	0.444849	0.921949	0.436887	0.237413	0.398541	0.890393	0.190944
-0.0512739	0.284733	-0.0101436	0.711583	0.428139	0.901083	0.43604	0.197407	0.399299	0.947987	0.258652
-0.0492132	0.368526	-0.132259	0.738887	0.416598	0.91866	0.449727	0.170403	0.402149	0.930892	0.316941
0.00684208	0.334066	-0.220368	0.698525	0.428487	0.98766	0.433481	0.194598	0.372721	0.945609	0.402351
0.0803812	0.317635	-0.20396	0.56907	0.415292	1.02339	0.376943	0.226358	0.405756	0.887605	0.358142
0.079843	0.225383	-0.211767	0.414333	0.395237	1.02293	0.372545	0.260131	0.365308	0.924103	0.325651
0.0198749	0.20462	-0.0892717	0.382588	0.374316	0.98025	0.421116	0.288293	0.34406	0.892356	0.316557
-0.105772	0.197942	-0.0459243	0.445206	0.394333	0.945957	0.448965	0.279706	0.297091	0.889895	0.27958
-0.164454	0.220835	-0.0183539	0.521772	0.437593	0.902923	0.439531	0.283919	0.276705	0.819697	0.237442
-0.109934	0.247593	-0.106484	0.548943	0.483151	0.851741	0.417721	0.287113	0.291859	0.846846	0.198823
-0.0383993	0.17902	-0.174505	0.556266	0.509615	0.796287	0.412178	0.23899	0.230032	0.834429	0.216487
0.0837409	0.181931	-0.0600091	0.533332	0.510614	0.729195	0.436188	0.253132	0.209398	0.847722	0.21911
0.125111	0.173887	0.0893393	0.534162	0.520325	0.701481	0.429189	0.231038	0.213815	0.847907	0.187399
0.0799455	0.199987	0.232726	0.498614	0.541223	0.662202	0.47513	0.253825	0.221878	0.886157	0.175693
-0.0236829	0.216425	0.267142	0.596603	0.577578	0.644028	0.491845	0.234949	0.238043	0.884729	0.169652
-0.120886	0.262908	0.218595	0.656191	0.5989	0.590153	0.502607	0.210153	0.187503	0.829683	0.20396
-0.184213	0.293182	0.197895	0.712748	0.60384	0.552093	0.487735	0.224528	0.160796	0.760533	0.206708
-0.22814	0.339222	0.15015	0.697864	0.603079	0.505724	0.441138	0.196022	0.149392	0.750024	0.214981
-0.282225	0.372794	0.154943	0.709459	0.592278	0.502211	0.398113	0.255336	0.178893	0.766408	0.210098
-0.341558	0.368827	0.161267	0.738331	0.569156	0.507929	0.352212	0.268365	0.168122	0.766443	0.239952
-0.357818	0.353087	0.205363	0.76252	0.54067	0.519667	0.386217	0.343073	0.146012	0.728311	0.252313
-0.324399	0.293069	0.172866	0.67835	0.509898	0.523768	0.400176	0.364528	0.120595	0.680732	0.212545
-0.281981	0.268777	0.0302652	0.664908	0.481195	0.525091	0.391567	0.366436	0.143078	0.667011	0.198251
-0.221064	0.256854	-0.106895	0.620293	0.466138	0.516237	0.414022	0.349515	0.162772	0.652429	0.219926
-0.247545	0.164762	-0.147346	0.61133	0.45374	0.480842	0.439504	0.337998	0.183594	0.673824	0.283019
-0.157796	0.157923	-0.163476	0.526276	0.475659	0.432704	0.486621	0.410935	0.246226	0.666605	0.331987
-0.158881	0.110943	0.0419822	0.47669	0.485785	0.357258	0.508978	0.461573	0.316255	0.670639	0.39318
-0.0658015	0.148293	0.157636	0.448241	0.488648	0.313305	0.522483	0.517831	0.36233	0.63053	0.418758
-0.0889318	0.119213	0.440876	0.467863	0.462283	0.259839	0.554815	0.524975	0.351428	0.639718	0.428677
-0.0787171	0.105967	0.600552	0.427107	0.450881	0.258319	0.577901	0.56577	0.285345	0.61303	0.386747
[truncated: 246 more rows]
