# Supplementary material for: An excitatory lateral hypothalamic circuit orchestrating pain behaviors in mice
Source: eLife. 2021 May 27;10:e66446. doi: 10.7554/eLife.66446 (PMC8159376; doi:10.7554/eLife.66446)
Supplement: Figure 1—source data 1. [file elife-66446-fig1-data1.xlsx]

## Sheet: Hotplate
1	2	3	4	5	6	7	8	9	10	11	12	13	14	15	16	17	18	19	20	21	22	23	24	25	26	27	28	29	30	31	32	33	34	35	36	37	38	39	40	41	42	43	44	45	46	47	48	49	50
0.17955	-0.75444	-0.55688	-0.5763	-0.54585	0.112248	-0.54074	-0.40577	-0.58214	-0.74443	-0.61472	-0.25114	-0.99767	-0.52474	-0.61622	-0.20692	-0.77539	0.192578	-0.37602	-0.34981	-0.06622	-0.63091	-0.05345	-0.37592	-0.31089	-0.05405	-0.1539	-0.7844	0.170793	-0.58979	-0.43706	-0.37965	-0.18328	-0.06664	-0.10616	0.212718	-0.23572	-0.35585	0.621969	0.688835	-0.12996	0.086501	0.01337	-0.10181	-0.05903	1.41517	0.275708	0.025921	-0.04788	-0.1643
0.16724	-0.74598	-0.56841	-0.59098	-0.54427	0.131469	-0.54978	-0.41457	-0.58169	-0.73239	-0.6081	-0.22077	-0.97925	-0.50508	-0.62242	-0.18989	-0.78605	0.173533	-0.36381	-0.33894	-0.07175	-0.63491	-0.09603	-0.36449	-0.36906	-0.05354	-0.16247	-0.75024	0.128274	-0.61541	-0.39732	-0.42727	-0.16305	-0.15271	-0.1326	0.183099	-0.23863	-0.3152	0.689244	0.633464	-0.14032	0.089937	0.001093	-0.04168	0.009803	1.32114	0.266288	-0.02056	-0.06778	-0.17129
0.164106	-0.74875	-0.5851	-0.63389	-0.50044	0.155987	-0.51608	-0.33968	-0.53963	-0.73822	-0.58933	-0.2502	-0.95209	-0.46966	-0.64378	-0.18461	-0.76446	0.148822	-0.34207	-0.40617	-0.10883	-0.62015	-0.12459	-0.40568	-0.42733	-0.06232	-0.17339	-0.64851	0.074912	-0.5996	-0.39254	-0.4239	-0.22146	-0.22892	-0.16278	0.165465	-0.22546	-0.35851	0.811608	0.560542	-0.10334	0.090733	0.030115	-0.08535	0.121874	1.18069	0.238883	-0.03387	-0.09315	-0.15579
0.24984	-0.75551	-0.58637	-0.59026	-0.50245	0.132959	-0.4934	-0.30763	-0.54609	-0.75352	-0.56743	-0.26574	-0.92405	-0.47558	-0.68089	-0.21358	-0.74576	0.116125	-0.33469	-0.50606	-0.09369	-0.61097	-0.19618	-0.42817	-0.48892	-0.15937	-0.14993	-0.65091	0.111795	-0.57056	-0.37599	-0.46723	-0.20275	-0.26923	-0.24053	0.128065	-0.16167	-0.27079	0.824775	0.515261	-0.08053	0.071815	0.013077	-0.11633	0.149664	1.08981	0.189566	-0.05669	-0.09583	-0.05643
0.250637	-0.77063	-0.5805	-0.55049	-0.48803	0.098568	-0.49254	-0.31784	-0.55493	-0.74715	-0.55543	-0.25294	-0.91134	-0.46725	-0.71049	-0.17833	-0.72598	0.133625	-0.31665	-0.45334	-0.08164	-0.60712	-0.28581	-0.40063	-0.47225	-0.21644	-0.16412	-0.59394	0.127488	-0.58258	-0.38283	-0.47483	-0.19712	-0.2511	-0.28393	0.108662	-0.07089	-0.20923	0.811432	0.469654	-0.09737	0.09185	0.02532	-0.27879	0.107516	1.07562	0.178228	-0.0457	-0.10245	-0.02339
0.257046	-0.79257	-0.56929	-0.50998	-0.4841	0.066516	-0.50099	-0.36367	-0.58546	-0.74134	-0.55875	-0.22014	-0.91732	-0.48177	-0.71776	-0.18716	-0.70336	0.150618	-0.31782	-0.42358	-0.07396	-0.62305	-0.37763	-0.38455	-0.52688	-0.18131	-0.13392	-0.594	0.132072	-0.58301	-0.36395	-0.55022	-0.13756	-0.28976	-0.37203	0.071289	-0.09279	-0.18511	0.771782	0.434305	-0.13353	0.033836	0.006343	-0.26905	0.063927	1.10732	0.12583	-0.07717	-0.09318	0.04396
0.196163	-0.7885	-0.58368	-0.52941	-0.47985	0.088705	-0.53051	-0.36788	-0.59855	-0.74973	-0.54673	-0.25133	-0.9281	-0.5012	-0.71821	-0.20236	-0.71714	0.17752	-0.32483	-0.24992	-0.09569	-0.65147	-0.31271	-0.42578	-0.51506	-0.00795	-0.11076	-0.61405	0.135543	-0.59246	-0.36537	-0.58772	-0.07369	-0.30346	-0.4053	0.095313	-0.14861	-0.21112	0.735249	0.388175	-0.09756	0.015191	0.020681	-0.22783	0.039756	1.0953	0.103888	-0.1218	-0.12306	0.143559
0.2057	-0.78239	-0.59015	-0.54107	-0.45271	0.088891	-0.51841	-0.41478	-0.60761	-0.76749	-0.5483	-0.27944	-0.92967	-0.53525	-0.71226	-0.23359	-0.65998	0.187059	-0.36824	-0.28883	-0.10841	-0.66355	-0.32062	-0.50095	-0.4532	0.108094	-0.10719	-0.67418	0.199572	-0.56683	-0.37007	-0.60421	-0.03386	-0.26168	-0.41706	0.089397	-0.26729	-0.20903	0.802017	0.360373	-0.03809	-0.02738	0.079747	-0.17532	0.077686	0.99517	0.087288	-0.1791	-0.12699	0.160132
0.200623	-0.77756	-0.58823	-0.57512	-0.49039	0.117331	-0.5176	-0.44731	-0.58011	-0.75384	-0.54009	-0.3194	-0.92441	-0.53837	-0.70779	-0.22805	-0.62125	0.167088	-0.37965	-0.2698	-0.09507	-0.67366	-0.35828	-0.5407	-0.35877	0.045007	-0.10858	-0.68705	0.268929	-0.56843	-0.36997	-0.57048	-0.02206	-0.15669	-0.35666	0.078813	-0.32918	-0.214	0.886427	0.311166	0.012393	-0.00903	0.1082	-0.14316	0.089195	0.872863	0.086382	-0.20891	-0.13445	0.173032
0.170158	-0.8057	-0.56964	-0.604	-0.50519	0.119624	-0.51177	-0.4859	-0.58486	-0.73803	-0.55594	-0.34721	-0.9259	-0.53063	-0.69901	-0.19325	-0.54192	0.168376	-0.35634	-0.35769	-0.09401	-0.6681	-0.4273	-0.52929	-0.28456	-0.00911	-0.1065	-0.69566	0.290879	-0.58577	-0.40578	-0.50871	-0.12767	-0.02685	-0.37019	-0.00184	-0.36464	-0.26537	0.889009	0.284501	0.011706	0.016751	0.105675	-0.15402	0.083906	0.833572	0.055013	-0.17906	-0.10028	0.079597
0.172769	-0.82304	-0.56223	-0.57881	-0.52255	0.120898	-0.47689	-0.45921	-0.58832	-0.721	-0.57679	-0.36991	-0.93811	-0.5123	-0.69219	-0.16751	-0.55062	0.147553	-0.31907	-0.35162	-0.10609	-0.68515	-0.48228	-0.51208	-0.36384	-0.00766	-0.10909	-0.71489	0.376803	-0.59175	-0.38857	-0.50327	-0.15953	-0.15287	-0.33152	-0.0106	-0.32866	-0.31047	0.856527	0.228007	-0.03106	-0.00861	0.05066	-0.19904	0.065968	0.803	0.000243	-0.19385	-0.11393	0.060173
0.17077	-0.83818	-0.55136	-0.54474	-0.54245	0.099027	-0.4838	-0.49998	-0.60305	-0.75567	-0.58826	-0.36586	-0.94802	-0.51409	-0.66762	-0.18742	-0.54544	0.191703	-0.30854	-0.34445	-0.13388	-0.6662	-0.49087	-0.52029	-0.40943	0.099869	-0.11724	-0.76535	0.44912	-0.60231	-0.42138	-0.49879	-0.18923	-0.19994	-0.36357	0.009428	-0.3436	-0.29419	0.776211	0.195305	-0.04939	-0.07707	0.024586	-0.31684	0.009791	0.760381	0.038137	-0.15732	-0.13617	0.015513
0.175395	-0.82273	-0.57114	-0.52476	-0.5688	0.067532	-0.437	-0.50055	-0.57757	-0.76011	-0.59172	-0.41626	-0.96335	-0.51382	-0.61231	-0.19983	-0.55427	0.141222	-0.29676	-0.33879	-0.12663	-0.65871	-0.53826	-0.47223	-0.43939	0.040454	-0.12993	-0.77922	0.457829	-0.61214	-0.43342	-0.50913	-0.15436	-0.2792	-0.36693	0.044066	-0.36286	-0.3307	0.775698	0.189349	-0.0941	-0.09771	0.047976	-0.34556	0.033965	0.72766	0.062926	-0.14667	-0.1499	-0.04036
0.143746	-0.81089	-0.57199	-0.56804	-0.63492	0.041989	-0.43196	-0.52824	-0.57623	-0.75635	-0.5513	-0.47927	-0.96911	-0.50342	-0.53976	-0.25517	-0.50904	0.078325	-0.28404	-0.36479	-0.10581	-0.64686	-0.4695	-0.50069	-0.41182	0.011099	-0.09275	-0.76708	0.363408	-0.64249	-0.51398	-0.48737	-0.21641	-0.14554	-0.39348	-0.03364	-0.36339	-0.30992	0.762711	0.193996	-0.07188	-0.06027	0.038802	-0.33677	-0.00635	0.692798	0.103127	-0.04328	-0.12627	-0.06195
0.124373	-0.80389	-0.59934	-0.59616	-0.62493	0.030221	-0.41544	-0.46189	-0.58926	-0.74063	-0.55708	-0.55442	-0.96618	-0.47998	-0.49308	-0.26435	-0.46072	-0.04936	-0.24338	-0.41733	-0.0918	-0.66077	-0.42941	-0.53521	-0.34751	-0.03121	-0.07913	-0.78892	0.273363	-0.64379	-0.55548	-0.43153	-0.23987	-0.07021	-0.3596	-0.11634	-0.39577	-0.36595	0.736472	0.206087	-0.01833	0.050303	0.09663	-0.3086	0.043741	0.686935	-0.00475	0.039299	-0.07196	-0.07901
0.09396	-0.8183	-0.58886	-0.59643	-0.64895	0.034133	-0.4419	-0.44807	-0.58311	-0.7248	-0.55014	-0.53845	-0.95497	-0.47173	-0.49633	-0.25345	-0.42789	-0.07018	-0.26898	-0.37751	-0.09582	-0.68052	-0.35324	-0.60806	-0.30318	-0.03418	-0.09838	-0.81689	0.216852	-0.62782	-0.55083	-0.42807	-0.23284	-0.01288	-0.29505	-0.14285	-0.40818	-0.31926	0.637022	0.183325	0.007411	0.001788	0.087964	-0.35826	-0.03089	0.624131	-0.06018	0.069276	-0.02635	-0.04367
0.068622	-0.82141	-0.60736	-0.57813	-0.62713	0.03715	-0.49428	-0.38974	-0.596	-0.73103	-0.57783	-0.55903	-0.94787	-0.49245	-0.53365	-0.22342	-0.39722	-0.05791	-0.28709	-0.32464	-0.10739	-0.70331	-0.2538	-0.59229	-0.20573	-0.07749	-0.13199	-0.85983	0.173585	-0.59185	-0.47958	-0.4029	-0.1869	0.058145	-0.17362	-0.12862	-0.38722	-0.34747	0.554924	0.162024	-0.0299	-0.07	0.110309	-0.39	0.011196	0.630098	-0.07887	0.050482	-0.00769	-0.09215
0.075403	-0.80506	-0.60139	-0.59002	-0.62977	0.033847	-0.5158	-0.39531	-0.59429	-0.72871	-0.58453	-0.5665	-0.94909	-0.49083	-0.55799	-0.17378	-0.4149	-0.01558	-0.33119	-0.37788	-0.09568	-0.721	-0.24913	-0.54348	-0.19395	-0.09711	-0.1644	-0.83647	0.126023	-0.57526	-0.43779	-0.45163	-0.10752	0.024492	-0.27125	-0.08911	-0.34013	-0.3809	0.499523	0.122016	-0.13484	-0.15577	0.082716	-0.40228	-0.00219	0.601857	-0.05296	-0.04564	-0.02952	-0.1418
0.087113	-0.79931	-0.60159	-0.6354	-0.59404	0.024823	-0.5653	-0.37948	-0.61732	-0.75261	-0.58266	-0.58533	-0.94781	-0.45755	-0.55617	-0.17895	-0.45524	-0.02476	-0.31558	-0.4233	-0.10487	-0.73953	-0.25817	-0.55941	-0.25312	-0.04581	-0.15404	-0.82705	0.134142	-0.57039	-0.42455	-0.49681	-0.07214	-0.08752	-0.32671	-0.00938	-0.22011	-0.3337	0.543427	0.086055	-0.18662	-0.18616	0.042244	-0.42878	-0.02169	0.569434	-0.02518	-0.08106	-0.06852	-0.11928
0.088714	-0.79296	-0.57859	-0.67157	-0.58565	0.028847	-0.5318	-0.44257	-0.58407	-0.75641	-0.58894	-0.58828	-0.9392	-0.39725	-0.56524	-0.17208	-0.44252	-0.07754	-0.33629	-0.52747	-0.07358	-0.74363	-0.34012	-0.60526	-0.28387	-0.03267	-0.13664	-0.81596	0.069335	-0.56406	-0.41981	-0.47646	-0.07726	-0.15524	-0.40766	0.066973	-0.17872	-0.377	0.501098	0.050109	-0.13252	-0.17976	0.06606	-0.45999	-0.08835	0.489351	-0.01298	-0.11669	-0.05269	-0.10106
0.069247	-0.78307	-0.57377	-0.64227	-0.56024	0.010374	-0.57189	-0.40206	-0.54278	-0.75711	-0.5811	-0.59923	-0.93055	-0.38168	-0.56825	-0.18684	-0.42003	-0.07105	-0.32237	-0.44491	-0.11589	-0.76016	-0.32185	-0.60477	-0.28116	-0.08534	-0.11208	-0.82112	0.088419	-0.61068	-0.35784	-0.42107	-0.12582	-0.20123	-0.35797	0.140465	-0.13998	-0.32756	0.585069	-0.00312	-0.13104	-0.24819	0.131592	-0.42581	-0.0685	0.420911	-0.0038	-0.10516	-0.04864	-0.08559
0.050039	-0.75798	-0.57618	-0.61505	-0.57156	0.034566	-0.59051	-0.38549	-0.52046	-0.74652	-0.59349	-0.62239	-0.94774	-0.39406	-0.59126	-0.16181	-0.34127	-0.04959	-0.33296	-0.42113	-0.10815	-0.76331	-0.33264	-0.54591	-0.20686	-0.11855	-0.10676	-0.79227	0.063214	-0.69321	-0.30783	-0.35098	-0.1377	-0.11343	-0.33337	0.109942	-0.14857	-0.35473	0.522164	-0.03803	-0.13342	-0.22899	0.20933	-0.35362	-0.00487	0.411749	0.008699	-0.08913	-0.02551	-0.1758
0.052396	-0.75152	-0.59122	-0.62437	-0.55627	0.028328	-0.65524	-0.38083	-0.53165	-0.75457	-0.57088	-0.59844	-0.97946	-0.43127	-0.62475	-0.1774	-0.41293	-0.02675	-0.34182	-0.35599	-0.12528	-0.76874	-0.35776	-0.49754	-0.25247	-0.05757	-0.08707	-0.81717	0.108635	-0.73989	-0.28829	-0.41233	-0.12288	-0.20201	-0.3029	0.138836	-0.21191	-0.29232	0.538891	-0.10476	-0.22412	-0.27324	0.20016	-0.1985	0.018628	0.365273	-0.03257	-0.12137	-0.05749	-0.12168
0.054476	-0.74679	-0.59732	-0.64257	-0.58291	0.056629	-0.66409	-0.41942	-0.51669	-0.73568	-0.6012	-0.54355	-0.98506	-0.45463	-0.615	-0.14766	-0.44032	-0.03902	-0.34797	-0.3374	-0.0884	-0.77893	-0.37682	-0.51431	-0.26682	-0.07289	-0.07702	-0.76707	0.108267	-0.72231	-0.33214	-0.47146	-0.11921	-0.13978	-0.21524	0.07448	-0.20777	-0.24825	0.544118	-0.09641	-0.22055	-0.19606	0.172786	-0.14502	-0.02664	0.380303	-0.04503	-0.13424	-0.06115	-0.09709
0.074494	-0.73448	-0.59965	-0.67243	-0.59038	0.059293	-0.66342	-0.45888	-0.49468	-0.73186	-0.59012	-0.47721	-0.97077	-0.45561	-0.61174	-0.14551	-0.47561	-0.03302	-0.32993	-0.42235	-0.08646	-0.79023	-0.42975	-0.56366	-0.28611	-0.04539	-0.09057	-0.78879	0.134345	-0.66159	-0.35675	-0.49258	-0.10003	-0.13954	-0.125	0.07848	-0.21395	-0.20923	0.563308	-0.12556	-0.21396	-0.22718	0.193997	-0.0653	0.004308	0.386003	-0.04961	-0.16109	-0.07966	0.006418
0.095036	-0.74056	-0.60445	-0.67094	-0.59168	0.095384	-0.64124	-0.4526	-0.47264	-0.72885	-0.59847	-0.42538	-0.96082	-0.46628	-0.58557	-0.12316	-0.44925	-0.00588	-0.32517	-0.47408	-0.10913	-0.7907	-0.4451	-0.59056	-0.30758	-0.03927	-0.124	-0.75886	0.19028	-0.61834	-0.36128	-0.49503	-0.10419	-0.11583	-0.2404	0.024793	-0.12495	-0.16275	0.634189	-0.081	-0.18193	-0.20873	0.223081	-0.08858	0.012889	0.396062	-0.09567	-0.16175	-0.12326	0.008232
0.079811	-0.74869	-0.60587	-0.70584	-0.56352	0.110756	-0.61602	-0.45295	-0.49962	-0.74843	-0.54904	-0.39998	-0.97027	-0.45564	-0.63691	-0.12241	-0.46502	-0.05822	-0.35373	-0.57108	-0.138	-0.7832	-0.43649	-0.62578	-0.32621	-0.03486	-0.17155	-0.80562	0.277766	-0.58928	-0.33281	-0.52	-0.06637	-0.18208	-0.25391	0.051857	-0.07927	-0.13001	0.572887	-0.09322	-0.1885	-0.23561	0.236187	-0.15154	0.052458	0.42377	-0.10937	-0.20374	-0.13001	0.044052
0.05993	-0.75735	-0.61439	-0.71546	-0.52634	0.129288	-0.60131	-0.39078	-0.53195	-0.75452	-0.55742	-0.40486	-0.97025	-0.49067	-0.64597	-0.13856	-0.48403	-0.05609	-0.41439	-0.49519	-0.13131	-0.75567	-0.38649	-0.60038	-0.35765	-0.0654	-0.14156	-0.81268	0.317274	-0.55332	-0.29973	-0.57212	-0.03141	-0.16019	-0.30008	-0.00475	-0.09625	-0.15759	0.532287	-0.08935	-0.21336	-0.22038	0.19407	-0.13882	0.014102	0.441081	-0.1449	-0.24239	-0.12089	0.041296
0.053587	-0.7401	-0.61532	-0.69481	-0.52274	0.121106	-0.62567	-0.36913	-0.51949	-0.74974	-0.54913	-0.42273	-0.96618	-0.50054	-0.64095	-0.10654	-0.46045	-0.02856	-0.40644	-0.45325	-0.13163	-0.7395	-0.35579	-0.58874	-0.37522	-0.08341	-0.14009	-0.80835	0.36579	-0.5659	-0.3026	-0.59941	0.003631	-0.0976	-0.25688	-0.03513	-0.14136	-0.11224	0.434941	-0.07662	-0.18763	-0.20573	0.185831	-0.16324	0.004793	0.49234	-0.11254	-0.24058	-0.07936	-0.00558
0.053254	-0.73926	-0.62054	-0.68729	-0.54543	0.120562	-0.63298	-0.36552	-0.50903	-0.73829	-0.53996	-0.46838	-0.95011	-0.55202	-0.63034	-0.09551	-0.44501	0.050087	-0.41158	-0.35986	-0.13669	-0.72588	-0.39649	-0.57895	-0.38618	-0.06749	-0.09571	-0.79865	0.310685	-0.54415	-0.33675	-0.60898	-0.02073	-0.1082	-0.25108	-0.03494	-0.16491	-0.11892	0.425336	-0.04797	-0.10875	-0.21035	0.157482	-0.15181	-0.03337	0.4366	-0.12475	-0.21807	-0.07096	-0.00622
0.085241	-0.74311	-0.61695	-0.6684	-0.53512	0.107398	-0.63889	-0.48795	-0.45834	-0.73132	-0.51062	-0.50585	-0.95237	-0.54604	-0.6209	-0.04736	-0.44088	0.132757	-0.36328	-0.34589	-0.17108	-0.72561	-0.40757	-0.53902	-0.42481	-0.04055	-0.08104	-0.78706	0.326757	-0.5482	-0.3508	-0.64915	-0.04533	-0.21399	-0.24839	-0.03859	-0.15531	-0.07158	0.385951	-0.00394	-0.08271	-0.1527	0.139959	-0.19988	0.06339	0.417363	-0.12313	-0.22197	-0.08543	-0.02597
0.087781	-0.74948	-0.61612	-0.66504	-0.54896	0.089463	-0.59901	-0.56258	-0.44874	-0.71976	-0.50368	-0.47636	-0.95567	-0.55715	-0.624	-0.02621	-0.45747	0.12116	-0.36337	-0.38094	-0.19586	-0.726	-0.43082	-0.51802	-0.40337	-0.11693	-0.07181	-0.75444	0.306127	-0.55461	-0.35142	-0.64319	-0.13237	-0.20327	-0.23476	-0.11805	-0.17288	-0.09459	0.366296	-0.00079	-0.12768	-0.05875	0.0835	-0.26944	0.100426	0.436811	-0.12435	-0.19009	-0.08545	-0.01021
0.101232	-0.74584	-0.61726	-0.62705	-0.54739	0.065911	-0.57097	-0.59086	-0.45188	-0.72736	-0.49503	-0.44655	-0.95747	-0.52699	-0.60786	-0.08351	-0.45687	0.116058	-0.34336	-0.4801	-0.17812	-0.71526	-0.45385	-0.46886	-0.45253	-0.06362	-0.04598	-0.76553	0.351825	-0.56371	-0.33429	-0.6541	-0.11663	-0.14339	-0.25725	-0.17878	-0.22641	-0.03706	0.312341	-0.00209	-0.21492	-0.00432	0.09607	-0.28975	0.104824	0.521306	-0.15829	-0.18469	-0.09578	-0.05098
0.042359	-0.74901	-0.62077	-0.62269	-0.56159	0.071771	-0.54681	-0.581	-0.45939	-0.75134	-0.43332	-0.44911	-0.95831	-0.51717	-0.59106	-0.12764	-0.40066	0.064689	-0.36787	-0.52222	-0.17565	-0.6989	-0.40246	-0.44351	-0.41357	-0.05224	-0.08823	-0.71518	0.322425	-0.55242	-0.34884	-0.6508	-0.10549	-0.00839	-0.19542	-0.20304	-0.26986	-0.10915	0.369292	0.005131	-0.23491	0.073349	0.125199	-0.27004	0.004982	0.601185	-0.2613	-0.12238	-0.08137	-0.12051
0.055085	-0.7501	-0.63302	-0.65406	-0.5783	0.07189	-0.57725	-0.51402	-0.47137	-0.80062	-0.3401	-0.48748	-0.95661	-0.49367	-0.56642	-0.18125	-0.35679	0.035824	-0.35812	-0.51713	-0.13735	-0.68806	-0.35415	-0.41624	-0.44182	0.001885	-0.05713	-0.75611	0.262997	-0.53605	-0.36575	-0.64921	-0.06698	-0.01875	-0.10066	-0.12425	-0.3042	-0.19876	0.293802	0.02457	-0.20256	0.129188	0.12598	-0.22071	-0.07495	0.608934	-0.30737	-0.12633	-0.06458	-0.23341
0.041745	-0.74685	-0.63019	-0.70086	-0.58385	0.085637	-0.58784	-0.49688	-0.44281	-0.83115	-0.27191	-0.53611	-0.97867	-0.46857	-0.54564	-0.1421	-0.30996	0.071363	-0.36869	-0.43342	-0.17025	-0.68145	-0.27035	-0.42168	-0.39063	-0.02643	-0.11663	-0.7504	0.191936	-0.55947	-0.3782	-0.62347	-0.11909	0.025589	-0.04947	-0.18145	-0.3286	-0.30269	0.291484	0.059363	-0.12647	0.220175	0.094677	-0.16356	-0.09767	0.59	-0.27838	-0.06547	-0.04301	-0.2185
0.067396	-0.74482	-0.63477	-0.71365	-0.60813	0.072264	-0.60808	-0.4487	-0.45002	-0.83642	-0.23687	-0.57074	-0.99085	-0.44921	-0.5222	-0.11656	-0.35009	0.03393	-0.35649	-0.44037	-0.17304	-0.66477	-0.36279	-0.45223	-0.43089	-0.11934	-0.11307	-0.78583	0.173741	-0.56546	-0.37376	-0.55366	-0.17228	0.010735	-0.00925	-0.20344	-0.38432	-0.35446	0.223982	0.066071	-0.10914	0.156221	0.071638	-0.16962	-0.12697	0.534049	-0.20359	-0.0867	-0.03626	-0.22921
0.031453	-0.73442	-0.64218	-0.6767	-0.58655	0.074917	-0.57538	-0.45727	-0.41196	-0.83256	-0.19502	-0.60801	-0.99939	-0.44372	-0.51455	-0.02952	-0.38161	0.021206	-0.37053	-0.43687	-0.25126	-0.66438	-0.32112	-0.52701	-0.42243	-0.12374	-0.18344	-0.75834	0.2108	-0.60423	-0.344	-0.55321	-0.15073	-0.00531	0.103949	-0.2235	-0.37639	-0.32247	0.311672	0.037053	-0.05809	0.046875	0.097711	-0.14446	-0.03894	0.450913	-0.13688	-0.12109	-0.06569	-0.08136
0.022503	-0.73942	-0.66822	-0.65075	-0.59568	0.063905	-0.55692	-0.45129	-0.41175	-0.83165	-0.2012	-0.62861	-0.98954	-0.46179	-0.50426	-0.00873	-0.40761	-0.0301	-0.36719	-0.47355	-0.26961	-0.66616	-0.33607	-0.56698	-0.49865	-0.17647	-0.17334	-0.76526	0.257426	-0.61641	-0.33621	-0.52239	-0.16558	-0.11418	0.173317	-0.10738	-0.37633	-0.31785	0.289264	0.011219	-0.0707	-0.03801	0.091205	-0.18991	-0.03058	0.404256	-0.09351	-0.16975	-0.06433	-0.04218
0.05574	-0.7329	-0.68146	-0.62274	-0.61228	0.051243	-0.51143	-0.44162	-0.40397	-0.85528	-0.20638	-0.62095	-0.99485	-0.46353	-0.52998	-0.0158	-0.39822	-0.04999	-0.37237	-0.4991	-0.30613	-0.67951	-0.24299	-0.63462	-0.52805	-0.15324	-0.15852	-0.77934	0.290362	-0.65876	-0.33114	-0.52589	-0.12821	-0.16143	0.206454	-0.01501	-0.39819	-0.19734	0.286306	-0.00783	-0.01808	0.017971	0.059422	-0.26499	-0.07838	0.37105	-0.00966	-0.14627	-0.08433	-0.00177
0.051932	-0.72393	-0.68906	-0.64808	-0.64453	0.038263	-0.55826	-0.45295	-0.44354	-0.85381	-0.24635	-0.63669	-0.98728	-0.43449	-0.53707	-0.07478	-0.40972	-0.05767	-0.38029	-0.39922	-0.26702	-0.69925	-0.25794	-0.62999	-0.54272	-0.12818	-0.15528	-0.80065	0.283132	-0.67849	-0.35052	-0.46534	-0.12288	-0.16103	0.225024	0.020131	-0.46699	-0.2074	0.172225	0.002398	-0.035	0.105743	0.070487	-0.24116	-0.16777	0.397238	-0.00583	-0.12102	-0.06473	-0.02777
0.075833	-0.71175	-0.67965	-0.6586	-0.629	0.029777	-0.63156	-0.42109	-0.48806	-0.8585	-0.23194	-0.64552	-0.98912	-0.40289	-0.52385	-0.06835	-0.4107	-0.07358	-0.38984	-0.3488	-0.26221	-0.71891	-0.2215	-0.56311	-0.523	-0.12003	-0.16495	-0.80413	0.220738	-0.67248	-0.30494	-0.44862	-0.04773	-0.05282	0.320782	0.012977	-0.49011	-0.20081	0.160875	0.003629	-0.05733	0.163911	0.105134	-0.21092	-0.19873	0.40013	-0.09466	-0.10898	-0.12091	-0.02956
0.050854	-0.71178	-0.6703	-0.66548	-0.62512	0.025259	-0.66211	-0.41448	-0.49206	-0.84602	-0.21234	-0.65402	-0.98312	-0.37285	-0.4879	-0.02612	-0.4017	-0.04964	-0.43967	-0.26421	-0.25156	-0.74301	-0.20088	-0.54759	-0.48386	-0.13171	-0.15877	-0.76439	0.159042	-0.63732	-0.25124	-0.398	-0.07937	-0.03172	0.357412	0.01561	-0.42148	-0.31547	0.157686	-0.0124	-0.02517	0.154128	0.205109	-0.14887	-0.17455	0.382201	-0.23712	-0.1147	-0.12504	0.042613
0.054696	-0.7151	-0.66281	-0.66204	-0.62694	0.014216	-0.65798	-0.38783	-0.48157	-0.85948	-0.20422	-0.70982	-1.0053	-0.38081	-0.47628	0.024106	-0.41762	-0.073	-0.45393	-0.28949	-0.24808	-0.7396	-0.18278	-0.55749	-0.46242	-0.22821	-0.13445	-0.77665	0.126658	-0.61716	-0.19009	-0.43122	-0.03562	-0.05857	0.337985	0.056453	-0.38573	-0.37184	0.208753	-0.03519	-0.01102	0.134325	0.268503	-0.18137	-0.14728	0.290714	-0.32046	-0.14198	-0.13512	0.099248
0.044048	-0.72774	-0.66649	-0.64619	-0.66609	0.004951	-0.60248	-0.39155	-0.45933	-0.8533	-0.19499	-0.69655	-1.02441	-0.38041	-0.47109	0.061837	-0.44237	-0.06674	-0.44191	-0.26472	-0.19602	-0.75217	-0.14377	-0.61217	-0.39812	-0.22152	-0.11959	-0.79539	0.109744	-0.58916	-0.21739	-0.4359	-0.08468	-0.17944	0.376128	0.133895	-0.33234	-0.41155	0.146491	-0.01957	0.046964	0.155642	0.312078	-0.17036	-0.17244	0.207245	-0.30647	-0.12612	-0.08039	0.10153
0.024989	-0.72334	-0.67498	-0.62879	-0.68126	0.00063	-0.5992	-0.37996	-0.45069	-0.83691	-0.20649	-0.69933	-1.03928	-0.39768	-0.45919	0.072635	-0.44766	-0.06962	-0.3816	-0.22839	-0.19029	-0.75952	-0.14253	-0.58666	-0.39059	-0.26707	-0.13538	-0.81598	0.111848	-0.56026	-0.2377	-0.46907	-0.06976	-0.1387	0.516537	0.145972	-0.37151	-0.44435	0.104935	-0.01512	7.47e-07	0.154046	0.28177	-0.11418	-0.13952	0.171439	-0.27954	-0.16013	-0.04337	0.044799
-0.00949	-0.72528	-0.67372	-0.62839	-0.70347	0.014375	-0.56509	-0.36024	-0.44369	-0.82393	-0.22649	-0.66314	-1.05655	-0.40418	-0.46142	0.058876	-0.41945	-0.04859	-0.32375	-0.17273	-0.21922	-0.77783	-0.11242	-0.56243	-0.34276	-0.29121	-0.11503	-0.86472	0.062654	-0.55025	-0.24289	-0.45989	-0.12269	-0.06718	0.613859	0.139418	-0.42729	-0.52491	0.034328	0.00074	0.071219	0.178631	0.204542	-0.07297	-0.12945	0.172605	-0.21594	-0.14611	-0.03224	0.052274
-0.01308	-0.7129	-0.6855	-0.61906	-0.74064	0.020223	-0.55418	-0.37859	-0.39815	-0.82635	-0.2442	-0.6807	-1.08494	-0.40938	-0.46504	0.097865	-0.40435	-0.07776	-0.30512	-0.12862	-0.26034	-0.77254	-0.1419	-0.54194	-0.32088	-0.32295	-0.13708	-0.88627	0.086908	-0.5658	-0.23368	-0.47136	-0.09686	0.053895	0.601878	0.046701	-0.52145	-0.49762	0.041802	-0.04663	0.074328	0.195834	0.17163	-0.0401	-0.0765	0.142433	-0.20568	-0.18893	-0.03984	0.063307
-0.00477	-0.72535	-0.69277	-0.63314	-0.76736	-0.00239	-0.5233	-0.40521	-0.37834	-0.84392	-0.2467	-0.67436	-1.11568	-0.40055	-0.4808	0.134348	-0.43348	-0.03609	-0.28258	-0.13079	-0.25657	-0.76227	-0.16041	-0.5819	-0.29354	-0.2407	-0.12863	-0.97983	0.068155	-0.57127	-0.24496	-0.48193	-0.10417	-0.01005	0.571498	0.020252	-0.57727	-0.50579	-0.01874	-0.08687	0.097286	0.150398	0.081788	-0.03607	-0.05431	0.06367	-0.19648	-0.20505	-0.07355	0.123451
0.013965	-0.7099	-0.71417	-0.61549	-0.74652	-0.00785	-0.48528	-0.41221	-0.29695	-0.87777	-0.21049	-0.65639	-1.1173	-0.3785	-0.43446	0.196691	-0.46642	0.000766	-0.2707	-0.13023	-0.25815	-0.75284	-0.18455	-0.61608	-0.27604	-0.19834	-0.14291	-0.94979	0.068072	-0.51979	-0.27903	-0.49575	-0.10042	-0.04174	0.609485	0.003591	-0.58585	-0.42477	-0.01845	-0.11398	0.046031	0.088506	0.038935	-0.04364	-0.04088	0.007944	-0.27795	-0.23353	-0.07838	0.119203
-0.00148	-0.67727	-0.72208	-0.6163	-0.73015	-0.02033	-0.46076	-0.40876	-0.26463	-0.90276	-0.16078	-0.66222	-1.10997	-0.39772	-0.36887	0.188642	-0.50496	0.077117	-0.19599	-0.17977	-0.26543	-0.74564	-0.22675	-0.66372	-0.2569	-0.16399	-0.10733	-0.94428	0.02346	-0.44242	-0.2799	-0.52104	-0.10644	-0.05415	0.671681	-0.0184	-0.56599	-0.49881	-0.07512	-0.11988	0.076015	-0.02312	-0.03706	-0.01577	-0.08423	-0.00562	-0.31307	-0.24587	-0.07894	0.170271
-0.02943	-0.62858	-0.73242	-0.61136	-0.77141	-0.02336	-0.43341	-0.37466	-0.22458	-0.94296	-0.11066	-0.67102	-1.102	-0.40775	-0.31883	0.154941	-0.49938	0.057641	-0.10485	-0.24458	-0.30235	-0.75757	-0.24286	-0.62873	-0.18922	-0.12427	-0.10575	-0.92966	0.065993	-0.41763	-0.27383	-0.51329	-0.14787	0.007673	0.705061	-0.05311	-0.5652	-0.46784	0.044933	-0.13934	0.118429	-0.0308	0.005933	-0.03001	-0.12631	0.009994	-0.38062	-0.27224	-0.1055	0.190108
-0.0446	-0.598	-0.72231	-0.60198	-0.82746	-0.05882	-0.44735	-0.38827	-0.26514	-0.94652	-0.03058	-0.68102	-1.10533	-0.40926	-0.26348	0.143678	-0.47116	0.089457	-0.04909	-0.29074	-0.26855	-0.74708	-0.22223	-0.61114	-0.08387	-0.01614	-0.10582	-0.94572	0.115591	-0.43083	-0.27146	-0.50359	-0.11996	0.005911	0.81117	-0.10357	-0.50646	-0.47265	0.030401	-0.16134	0.140852	-0.08864	0.034931	0.012081	-0.21252	0.003564	-0.40379	-0.30415	-0.12319	0.187199
-0.06411	-0.56796	-0.7347	-0.56301	-0.8301	-0.09055	-0.46774	-0.41613	-0.25285	-0.95585	0.019257	-0.65374	-1.10245	-0.3698	-0.23786	0.179633	-0.45551	0.058165	-0.03655	-0.25622	-0.25982	-0.73349	-0.13897	-0.60733	0.044677	0.066664	-0.14756	-0.92369	0.170889	-0.49542	-0.27263	-0.48946	-0.07689	0.006831	0.83071	-0.12506	-0.41386	-0.42303	0.116892	-0.21057	0.115301	-0.05286	0.061963	-0.0861	-0.17514	-0.02175	-0.44018	-0.34424	-0.18263	0.14635
-0.06747	-0.52929	-0.75502	-0.52398	-0.79096	-0.11956	-0.45699	-0.46762	-0.24437	-0.95441	0.067086	-0.6748	-1.08869	-0.35484	-0.18405	0.264538	-0.44158	0.090866	-0.06415	-0.22271	-0.26181	-0.68697	-0.07818	-0.62327	0.148348	0.052823	-0.20466	-0.88167	0.156343	-0.49301	-0.25821	-0.49551	-0.04097	-0.02463	0.815257	-0.15817	-0.3505	-0.37656	0.03849	-0.20732	0.097259	-0.0591	0.017217	-0.1291	-0.20356	-0.0798	-0.42619	-0.34625	-0.17354	0.170247
-0.02908	-0.50799	-0.78387	-0.50762	-0.77813	-0.138	-0.40839	-0.45868	-0.22847	-0.98322	0.113088	-0.70389	-1.07504	-0.36457	-0.16777	0.266496	-0.40482	0.059457	-0.10716	-0.27757	-0.33266	-0.66207	-0.00077	-0.57188	0.208182	0.06809	-0.21295	-0.87577	0.124237	-0.4154	-0.27701	-0.48583	-0.04892	0.039962	0.689237	-0.20503	-0.38015	-0.39487	0.034049	-0.21993	0.072229	0.028605	-0.03987	-0.13911	-0.21882	-0.07292	-0.46156	-0.32004	-0.15491	0.114288
-0.00755	-0.50167	-0.78878	-0.49355	-0.78952	-0.15263	-0.37926	-0.46235	-0.23323	-1.00391	0.193211	-0.73228	-1.06068	-0.39799	-0.12029	0.256515	-0.35179	0.156583	-0.14771	-0.25837	-0.38104	-0.62712	0.039266	-0.5971	0.204771	0.148324	-0.20497	-0.897	0.069459	-0.39455	-0.24433	-0.52752	-0.07471	-0.07968	0.657254	-0.17074	-0.47934	-0.3729	-0.051	-0.26635	0.116017	0.032547	-0.09613	-0.01801	-0.30096	-0.07614	-0.48412	-0.29241	-0.16699	0.084613
-0.00971	-0.49123	-0.8068	-0.47594	-0.79943	-0.15794	-0.36629	-0.41932	-0.23881	-1.01364	0.291231	-0.7101	-1.04878	-0.41986	-0.07925	0.25756	-0.27721	0.194439	-0.18124	-0.31286	-0.4401	-0.59146	0.084857	-0.68272	0.291434	0.252117	-0.17076	-0.88591	0.063188	-0.38627	-0.25321	-0.57437	-0.09612	-0.0658	0.649415	-0.17345	-0.51679	-0.35267	-0.09544	-0.30453	0.164338	-0.08428	-0.11139	0.101437	-0.36451	-0.05485	-0.45034	-0.2857	-0.23411	0.067859
-0.03847	-0.46263	-0.82089	-0.41273	-0.77676	-0.16795	-0.33491	-0.46414	-0.20883	-1.01202	0.414943	-0.72215	-1.05535	-0.45097	-0.06127	0.2931	-0.23934	0.333976	-0.19059	-0.36763	-0.4733	-0.55223	-0.00756	-0.79856	0.335662	0.316977	-0.16104	-0.87043	0.132766	-0.45935	-0.21284	-0.57775	-0.13159	-0.13543	0.675737	-0.16381	-0.54482	-0.30935	-0.16577	-0.33489	0.230002	-0.16247	-0.02298	0.148966	-0.37671	-0.09658	-0.35067	-0.29196	-0.30572	0.088675
-0.02161	-0.41052	-0.84073	-0.26754	-0.76959	-0.17463	-0.30279	-0.50361	-0.18594	-1.02448	0.554272	-0.70134	-1.07439	-0.44283	-0.03826	0.297525	-0.15548	0.314248	-0.20733	-0.40216	-0.53837	-0.50357	-0.08391	-0.74294	0.440735	0.388899	-0.1128	-0.81791	0.273803	-0.45752	-0.17533	-0.53183	-0.19364	0.010688	0.688096	-0.247	-0.47879	-0.31548	-0.2119	-0.26164	0.215917	-0.16645	0.058332	0.112865	-0.38565	-0.05637	-0.24654	-0.22491	-0.31637	0.062636
-0.00691	-0.36186	-0.84732	-0.13488	-0.78564	-0.19862	-0.30122	-0.55624	-0.15676	-1.03536	0.69741	-0.75019	-1.10154	-0.46714	-0.03128	0.277195	-0.1584	0.279477	-0.2345	-0.31946	-0.54655	-0.4933	-0.1684	-0.60242	0.465	0.479693	-0.07186	-0.80014	0.387662	-0.49568	-0.17313	-0.50735	-0.16132	0.066877	0.69171	-0.32018	-0.4503	-0.38839	-0.2843	-0.17824	0.207441	-0.04648	0.177157	0.069361	-0.3924	0.013006	-0.1663	-0.1038	-0.27675	0.024773
-0.00184	-0.31787	-0.85137	-0.00875	-0.82407	-0.2267	-0.31425	-0.51859	-0.14412	-1.04069	0.779165	-0.7431	-1.11697	-0.45838	-0.02416	0.30281	-0.13122	0.209173	-0.26799	-0.22086	-0.55128	-0.46388	-0.19198	-0.47375	0.535286	0.537926	-0.06091	-0.76457	0.467369	-0.47974	-0.18991	-0.50543	-0.15705	0.180428	0.738045	-0.39736	-0.45069	-0.30582	-0.25778	-0.05907	0.176541	0.05499	0.216969	0.014203	-0.40237	0.153908	-0.12826	0.012586	-0.23559	0.031051
-0.04068	-0.30257	-0.8644	0.006579	-0.85294	-0.26253	-0.36144	-0.43948	-0.12422	-1.0572	0.86036	-0.66314	-1.11727	-0.46771	-0.04903	0.367337	-0.18306	0.157665	-0.30119	-0.14283	-0.5559	-0.45146	-0.26366	-0.44322	0.555236	0.504092	-0.06479	-0.74122	0.489582	-0.47568	-0.23797	-0.55239	-0.14212	0.057062	0.792908	-0.3446	-0.49415	-0.1992	-0.26973	-0.01857	0.141069	-0.01119	0.190601	0.003176	-0.42	0.161936	-0.07501	0.021887	-0.26248	0.101554
-0.04943	-0.29017	-0.8826	0.032814	-0.86255	-0.30069	-0.41222	-0.39973	-0.15306	-1.08407	0.933399	-0.55753	-1.11798	-0.48544	-0.07059	0.426729	-0.18466	0.114468	-0.32794	-0.14005	-0.58452	-0.394	-0.37075	-0.47436	0.541392	0.476744	-0.08631	-0.73685	0.520836	-0.45825	-0.24344	-0.5739	-0.10574	-0.07985	0.767933	-0.28753	-0.49157	-0.02401	-0.26793	0.01177	0.105145	-0.04561	0.119482	0.06311	-0.42506	0.159142	-0.03597	-0.03038	-0.32696	0.093943
-0.0789	-0.27909	-0.90676	0.045789	-0.85996	-0.3235	-0.49274	-0.38512	-0.17531	-1.10393	1.0303	-0.43213	-1.11581	-0.49217	-0.07051	0.464517	-0.11253	0.005984	-0.37537	-0.01991	-0.61897	-0.3254	-0.46022	-0.44156	0.587806	0.460753	-0.09322	-0.72212	0.553865	-0.47016	-0.22633	-0.56394	-0.10671	-0.09864	0.691992	-0.25675	-0.39307	-0.03573	-0.32891	0.059932	0.099514	-0.10041	0.056369	0.196412	-0.47896	0.152822	0.049597	-0.04912	-0.3776	0.063161
-0.13247	-0.26958	-0.92986	0.096661	-0.87338	-0.33849	-0.49467	-0.4079	-0.19886	-1.1194	1.11304	-0.43952	-1.14646	-0.51557	-0.06154	0.477809	-0.03438	0.017618	-0.4213	-0.03968	-0.62446	-0.24515	-0.40296	-0.37674	0.62956	0.517102	-0.09486	-0.73821	0.629243	-0.45255	-0.21584	-0.51245	-0.13314	-0.05817	0.697445	-0.30097	-0.32018	-0.04134	-0.38687	0.138993	0.091574	0.049738	0.037378	0.319726	-0.52947	0.203186	0.093748	-0.00764	-0.34681	0.105002
-0.21295	-0.2573	-0.9384	0.151611	-0.90791	-0.33907	-0.52151	-0.39211	-0.16883	-1.12913	1.19928	-0.43077	-1.16062	-0.51686	-0.04477	0.516902	0.064889	0.032766	-0.45872	0.056121	-0.61452	-0.1595	-0.28065	-0.2617	0.712379	0.58944	-0.06687	-0.73185	0.628488	-0.41315	-0.17608	-0.44132	-0.2816	0.060528	0.802993	-0.3587	-0.23062	-0.01636	-0.40435	0.181729	0.080818	0.1288	-0.05073	0.51933	-0.58544	0.24464	0.136313	0.088062	-0.29837	0.127571
-0.30771	-0.23828	-0.9538	0.206279	-0.94695	-0.34712	-0.54735	-0.44059	-0.13129	-1.11801	1.22711	-0.49298	-1.17919	-0.55262	-0.03346	0.603296	0.113231	0.101339	-0.47348	0.173821	-0.60609	-0.06683	-0.26631	-0.21468	0.725855	0.565084	-0.06965	-0.69679	0.629279	-0.38293	-0.17054	-0.42604	-0.36218	0.037386	0.878856	-0.33455	-0.24414	0.096863	-0.37471	0.194284	0.033667	0.228103	-0.12593	0.668905	-0.59801	0.243691	0.194907	0.14202	-0.26011	0.11545
-0.32274	-0.20824	-0.9687	0.232277	-0.9815	-0.37378	-0.5643	-0.41535	-0.10026	-1.0957	1.24324	-0.48476	-1.15412	-0.60173	-0.02541	0.668823	0.244456	0.084577	-0.51497	0.288236	-0.5933	0.038677	-0.30859	-0.19649	0.740663	0.465844	-0.07809	-0.65471	0.610184	-0.3869	-0.15752	-0.41328	-0.388	0.122723	0.965809	-0.274	-0.30266	0.226345	-0.3607	0.22399	0.052838	0.236629	-0.15468	0.684393	-0.59691	0.241854	0.271997	0.180164	-0.27321	-0.00605
-0.37385	-0.1884	-0.98932	0.249956	-0.99447	-0.40165	-0.54401	-0.43398	-0.08742	-1.07497	1.26351	-0.47105	-1.15636	-0.6409	-0.03127	0.746554	0.413659	0.143533	-0.57865	0.293129	-0.55858	0.131674	-0.34904	-0.19773	0.761511	0.352132	-0.08762	-0.60517	0.621501	-0.42757	-0.17823	-0.38024	-0.33847	0.041807	1.03606	-0.08373	-0.37056	0.222006	-0.37304	0.253048	0.037084	0.249961	-0.09747	0.659406	-0.58376	0.221845	0.339108	0.163292	-0.3191	-0.08069
-0.40509	-0.17604	-1.00311	0.242214	-0.98637	-0.42376	-0.53555	-0.4054	-0.07271	-1.1011	1.3456	-0.36528	-1.15851	-0.68707	-0.03643	0.796501	0.647043	0.149129	-0.61579	0.28561	-0.52295	0.226957	-0.22801	-0.18552	0.772961	0.433028	-0.10748	-0.56279	0.638657	-0.44145	-0.15244	-0.33533	-0.22713	0.030265	1.13459	0.024826	-0.33152	0.280099	-0.44429	0.262314	0.012226	0.194052	-0.00752	0.732856	-0.5835	0.277228	0.409351	0.173017	-0.34047	-0.03433
-0.4965	-0.16777	-1.02124	0.240572	-0.9685	-0.41663	-0.50844	-0.38999	-0.06518	-1.12808	1.41358	-0.34634	-1.17059	-0.68842	-0.07212	0.901643	0.835383	0.261998	-0.66438	0.219757	-0.56025	0.318623	-0.06981	-0.21972	0.801783	0.411938	-0.13479	-0.52982	0.664634	-0.49611	-0.16143	-0.30514	-0.0543	-0.05371	1.20938	0.113697	-0.29919	0.266824	-0.43424	0.234153	-0.04626	0.110529	0.140857	0.94628	-0.62613	0.416094	0.494481	0.105293	-0.34803	0.023009
-0.53891	-0.1419	-1.03565	0.228532	-0.92704	-0.42032	-0.48297	-0.36116	-0.07543	-1.16502	1.47099	-0.29863	-1.16198	-0.66972	-0.14483	0.96865	1.06305	0.300013	-0.68142	0.21524	-0.59791	0.392773	0.020665	-0.30743	0.849396	0.370696	-0.18018	-0.48212	0.690822	-0.56692	-0.16095	-0.27249	0.072019	-0.01432	1.27018	0.115865	-0.30859	0.364633	-0.47249	0.225281	-0.06815	0.092677	0.35243	1.1405	-0.67521	0.6142	0.627483	0.073384	-0.37156	0.079739
-0.61017	-0.10209	-1.04453	0.238625	-0.89399	-0.41776	-0.45606	-0.32482	-0.07863	-1.17144	1.48611	-0.31238	-1.15194	-0.59375	-0.18426	1.05198	1.2426	0.385617	-0.70251	0.165225	-0.64227	0.444756	0.021237	-0.45006	0.912566	0.214665	-0.18958	-0.44959	0.695408	-0.67837	-0.13415	-0.25373	0.179976	-0.03118	1.37272	0.189714	-0.31631	0.388634	-0.43899	0.190284	-0.02921	0.075831	0.524924	1.28871	-0.64478	0.764353	0.747801	-0.01872	-0.5059	0.126569
-0.63778	-0.06936	-1.03067	0.250135	-0.88054	-0.44685	-0.48187	-0.30578	-0.05935	-1.19811	1.48915	-0.25081	-1.16299	-0.5593	-0.21407	1.12251	1.50842	0.405673	-0.69585	0.267344	-0.6379	0.504246	0.033729	-0.57805	0.957923	0.172978	-0.23279	-0.43721	0.701887	-0.757	-0.11463	-0.14494	0.274444	0.036405	1.40542	0.265254	-0.20541	0.509582	-0.49524	0.136421	0.052437	0.072531	0.596179	1.34489	-0.65615	0.821318	0.849552	-0.06276	-0.60129	0.129566
-0.69376	-0.03837	-1.03213	0.224426	-0.89448	-0.45203	-0.51116	-0.32565	-0.01173	-1.20175	1.47379	-0.29182	-1.17774	-0.56459	-0.22874	1.20802	1.71794	0.418168	-0.72314	0.310157	-0.66786	0.563737	0.059991	-0.63519	0.937012	0.039668	-0.26508	-0.39695	0.672249	-0.82152	-0.13159	-0.03585	0.457838	0.072458	1.46683	0.361025	-0.15504	0.60745	-0.55264	0.075682	0.093447	-0.01578	0.617183	1.40438	-0.61415	0.872167	0.939092	-0.13622	-0.69309	0.191001
-0.68079	-0.01645	-1.05798	0.218107	-0.97233	-0.47608	-0.54148	-0.30911	0.021926	-1.20677	1.44758	-0.2972	-1.20099	-0.60216	-0.28313	1.22965	1.87924	0.483671	-0.76001	0.34124	-0.68603	0.626478	0.062831	-0.65141	0.877475	-0.12592	-0.28511	-0.41907	0.704598	-0.88456	-0.22567	0.078162	0.667436	-0.02649	1.45972	0.544718	-0.11827	0.728714	-0.70284	0.027177	0.134375	-0.14276	0.614989	1.40944	-0.65122	0.870761	1.03906	-0.20216	-0.78843	0.282033
-0.70014	0.002159	-1.09073	0.226646	-1.00386	-0.47709	-0.53468	-0.31935	0.041248	-1.19885	1.42669	-0.3495	-1.19879	-0.63676	-0.29438	1.23327	1.99051	0.574216	-0.79082	0.310604	-0.71297	0.641228	0.060563	-0.65665	0.849213	-0.28413	-0.26507	-0.37391	0.722092	-0.94938	-0.3149	0.159929	0.78581	-0.13244	1.45307	0.659329	-0.20323	0.764887	-0.82166	0.010891	0.135008	-0.30233	0.675	1.50949	-0.61405	0.862324	1.1785	-0.27017	-0.90305	0.349747
-0.69059	0.017065	-1.10088	0.267437	-1.0205	-0.46838	-0.50155	-0.26317	0.068802	-1.19906	1.39951	-0.40257	-1.19572	-0.6405	-0.29587	1.23217	2.01643	0.656367	-0.79407	0.239948	-0.75031	0.653942	0.159204	-0.69723	0.86889	-0.40061	-0.25012	-0.38114	0.768489	-0.95723	-0.34777	0.249889	0.826524	-0.24732	1.37913	0.741397	-0.18485	0.82748	-0.90743	-0.00872	0.135373	-0.36766	0.699654	1.39794	-0.64278	0.791701	1.15544	-0.36672	-0.97719	0.293682
-0.71921	0.017924	-1.09756	0.282367	-0.99974	-0.45284	-0.48744	-0.27102	0.072607	-1.22074	1.38463	-0.44681	-1.18253	-0.65349	-0.2974	1.26465	2.06774	0.692446	-0.81698	0.237628	-0.81983	0.653722	0.360846	-0.73633	0.853665	-0.45826	-0.26632	-0.3808	0.754017	-0.93876	-0.32053	0.454638	0.759247	-0.23297	1.38337	0.812245	-0.15588	0.836233	-0.93106	-0.05362	0.096508	-0.32737	0.742979	1.27313	-0.69561	0.82825	1.07716	-0.41802	-0.98753	0.10443
-0.71172	0.040826	-1.09122	0.26395	-0.95479	-0.44469	-0.49338	-0.26662	0.089404	-1.2172	1.38789	-0.45264	-1.16418	-0.60998	-0.33218	1.33836	2.08878	0.7011	-0.84304	0.203509	-0.89836	0.667089	0.504268	-0.78443	0.824705	-0.54201	-0.31261	-0.3837	0.707599	-0.92058	-0.25454	0.670523	0.824988	-0.27945	1.41356	0.907105	-0.05972	0.945458	-0.90964	-0.08554	0.094249	-0.22019	0.700449	1.18761	-0.73699	0.785191	0.927956	-0.42323	-0.98356	0.07685
-0.69135	0.070262	-1.10023	0.28655	-0.93385	-0.45349	-0.55537	-0.34982	0.110592	-1.22316	1.37729	-0.3956	-1.15343	-0.59097	-0.35897	1.40694	2.11154	0.788475	-0.89284	0.301897	-0.92952	0.69051	0.595335	-0.80478	0.772431	-0.6432	-0.35111	-0.37364	0.684248	-0.90448	-0.14033	0.96835	0.842127	-0.30436	1.3808	0.995812	0.004359	0.998398	-0.92258	-0.12948	0.141848	-0.12628	0.619027	1.16332	-0.80584	0.743045	0.90225	-0.38273	-0.95867	0.055006
-0.69962	0.104733	-1.10962	0.283933	-0.89885	-0.45834	-0.56755	-0.35506	0.118922	-1.23267	1.35818	-0.40678	-1.13881	-0.5849	-0.3738	1.46891	2.13359	0.917714	-0.90329	0.265699	-0.94407	0.691445	0.682832	-0.82194	0.735629	-0.73501	-0.42033	-0.33671	0.665452	-0.83735	-0.11931	1.24202	0.904635	-0.3676	1.33159	1.02592	0.046654	1.11352	-0.96815	-0.1578	0.223773	-0.17326	0.426139	1.06831	-0.83256	0.544125	0.832168	-0.37733	-0.93313	0.093295
-0.7279	0.129795	-1.10315	0.284036	-0.94971	-0.4573	-0.52383	-0.40159	0.139047	-1.23769	1.31482	-0.46494	-1.15388	-0.58403	-0.35475	1.47362	2.17263	1.04127	-0.94637	0.225593	-0.88829	0.711543	0.806012	-0.74868	0.704326	-0.84026	-0.4272	-0.32818	0.694401	-0.74962	-0.11006	1.60946	0.847275	-0.3255	1.16955	1.01441	0.016007	1.10692	-1.0114	-0.21801	0.219329	-0.27741	0.231328	0.827761	-0.87979	0.43149	0.908078	-0.40181	-0.92654	0.018323
-0.75484	0.145107	-1.09169	0.244818	-0.94913	-0.45727	-0.45684	-0.3935	0.176782	-1.24947	1.28404	-0.51908	-1.17296	-0.55962	-0.31926	1.44977	2.23121	1.15034	-0.9887	0.184281	-0.84421	0.706876	0.899343	-0.71519	0.61486	-0.7556	-0.40681	-0.29364	0.677028	-0.62142	-0.15005	1.96223	0.685531	-0.34867	1.09245	1.03709	0.046812	1.08909	-0.99679	-0.27732	0.213188	-0.4209	-0.00858	0.55062	-0.7922	0.278482	1.0102	-0.40377	-0.94	0.010495
-0.73753	0.1634	-1.0656	0.221363	-0.9541	-0.44837	-0.401	-0.4681	0.245619	-1.2428	1.24231	-0.57432	-1.19222	-0.496	-0.30643	1.39717	2.22328	1.21397	-1.01997	0.156021	-0.78556	0.716088	1.0674	-0.71013	0.527702	-0.73756	-0.3372	-0.27058	0.600296	-0.54201	-0.17576	2.20376	0.667943	-0.40346	0.939838	1.07126	0.058771	1.06766	-0.97857	-0.28595	0.22667	-0.41886	-0.12725	0.427175	-0.70758	0.207263	1.08641	-0.40188	-0.97392	-0.01842
-0.71925	0.178096	-1.04101	0.226345	-0.89862	-0.43699	-0.35265	-0.56737	0.29934	-1.22339	1.18828	-0.60232	-1.20112	-0.41539	-0.31727	1.34065	2.1933	1.28925	-1.03024	0.140477	-0.77056	0.713565	1.168	-0.75736	0.408115	-0.65229	-0.27362	-0.17051	0.53754	-0.47484	-0.19915	2.32241	0.712757	-0.50415	0.90087	1.12716	0.118143	1.11061	-0.9471	-0.2956	0.302427	-0.37528	-0.18709	0.31298	-0.61912	0.109678	1.0453	-0.36382	-0.99519	0.000961
-0.69804	0.179674	-1.01333	0.216284	-0.86902	-0.42691	-0.29925	-0.63173	0.307006	-1.19957	1.15869	-0.6283	-1.21844	-0.3474	-0.3287	1.30242	2.14762	1.32129	-1.01358	0.116647	-0.73619	0.720277	1.20499	-0.79526	0.348823	-0.66696	-0.24847	-0.1712	0.534249	-0.53126	-0.19142	2.3578	0.876263	-0.58939	0.832716	1.19211	0.128606	1.12316	-0.97571	-0.29146	0.375654	-0.27684	-0.1235	0.376556	-0.68306	0.093459	0.955954	-0.34381	-0.99816	-0.00251
-0.63319	0.168779	-0.9905	0.235674	-0.80184	-0.40571	-0.2271	-0.66786	0.30926	-1.17082	1.09593	-0.64364	-1.22731	-0.29015	-0.29823	1.27777	2.09671	1.41718	-1.03041	0.146567	-0.7108	0.719959	1.08091	-0.75455	0.261053	-0.58728	-0.21778	-0.12367	0.653875	-0.54697	-0.18355	2.41631	0.829141	-0.61354	0.777333	1.22762	0.048181	1.07442	-0.94988	-0.3462	0.350687	-0.11748	-0.14318	0.365273	-0.75327	0.07869	0.914507	-0.29128	-0.99009	0.02275
-0.61488	0.18468	-0.98446	0.257115	-0.74759	-0.38624	-0.19283	-0.68297	0.340659	-1.18315	1.05167	-0.617	-1.23768	-0.25609	-0.28072	1.25521	2.04523	1.53726	-1.0115	0.183012	-0.70103	0.714694	1.06929	-0.70465	0.197498	-0.54749	-0.18486	-0.15305	0.719335	-0.55926	-0.18545	2.48258	0.624462	-0.64234	0.697408	1.28177	0.036391	0.993292	-0.88146	-0.35226	0.298814	-0.01968	-0.22728	0.426356	-0.75804	0.071195	0.902908	-0.22189	-0.94777	-0.00433
-0.55889	0.197963	-0.96693	0.34542	-0.70581	-0.33822	-0.16048	-0.71351	0.394675	-1.19764	0.975854	-0.51807	-1.22858	-0.22283	-0.26752	1.22629	1.97615	1.73786	-0.97305	0.273901	-0.6653	0.701818	1.14759	-0.648	0.073133	-0.39677	-0.15868	-0.13235	0.847961	-0.47185	-0.18714	2.53028	0.357461	-0.65082	0.673635	1.36372	0.017091	0.941422	-0.7683	-0.3898	0.188919	0.065983	-0.40481	0.520652	-0.73022	0.057848	0.814132	-0.20055	-0.95935	-0.03288
-0.4835	0.211368	-0.93139	0.433122	-0.66924	-0.29911	-0.04944	-0.79217	0.476331	-1.19558	0.919731	-0.3289	-1.2399	-0.13518	-0.27915	1.23388	1.92975	1.90249	-0.88274	0.252452	-0.67305	0.707722	1.22863	-0.6131	0.003821	-0.40242	-0.08649	-0.15886	0.946074	-0.40416	-0.15172	2.60816	0.109809	-0.70065	0.60905	1.47368	-0.01965	0.916794	-0.68909	-0.38992	0.160176	0.066803	-0.54768	0.581466	-0.64133	0.06342	0.791807	-0.14919	-0.92602	-0.09239
-0.35524	0.223799	-0.88194	0.512559	-0.57352	-0.20383	0.07443	-0.81847	0.564603	-1.17002	0.88066	-0.15766	-1.22015	-0.00898	-0.26009	1.25562	1.85966	1.99362	-0.71559	0.259357	-0.66613	0.724718	1.27254	-0.6066	-0.04587	-0.33162	-0.05626	-0.17679	1.04156	-0.31543	-0.11097	2.61118	-0.04588	-0.81771	0.456342	1.60877	-0.0621	0.84154	-0.67705	-0.41524	0.122812	0.054093	-0.66079	0.818306	-0.65201	0.068261	0.716635	-0.15157	-0.89807	-0.11007
-0.1596	0.265843	-0.83759	0.575461	-0.4559	-0.09777	0.276925	-0.9003	0.687107	-1.13369	0.815801	0.04042	-1.21508	0.152237	-0.22651	1.33803	1.78148	1.96649	-0.48261	0.216396	-0.71097	0.776077	1.18242	-0.58714	-0.08272	-0.45293	-0.00199	-0.19213	1.05124	-0.26515	-0.0697	2.53589	-0.03747	-0.82725	0.211867	1.53411	-0.13248	0.732948	-0.63443	-0.41924	0.146495	0.113524	-0.7767	0.747573	-0.64317	0.044904	0.660416	-0.12661	-0.85398	-0.08464
0.039914	0.323656	-0.78459	0.622624	-0.338	0.01702	0.42152	-0.93677	0.82864	-1.10897	0.795631	0.189001	-1.18731	0.277267	-0.15877	1.4096	1.70421	1.88477	-0.2633	0.232457	-0.69216	0.831144	1.15674	-0.57245	-0.15525	-0.39046	0.028565	-0.16836	1.04104	-0.2272	0.003694	2.43069	-0.19252	-0.76244	-0.01658	1.46112	-0.11198	0.567188	-0.55208	-0.43972	0.122521	0.100687	-0.88957	0.684908	-0.72337	0.023923	0.604585	-0.13493	-0.87123	-0.04765
0.259091	0.387409	-0.73891	0.719371	-0.25213	0.113877	0.602819	-0.96914	0.93384	-1.06743	0.765665	0.344042	-1.1751	0.347387	-0.11399	1.49394	1.60509	1.80526	-0.09977	0.203826	-0.66987	0.883596	1.13001	-0.52965	-0.24228	-0.3306	0.081549	-0.10734	1.0974	-0.21937	0.071155	2.32427	-0.30881	-0.65159	-0.21112	1.37718	-0.1065	0.495627	-0.424	-0.4383	0.118241	0.170125	-0.91484	0.388512	-0.70476	0.047351	0.534849	-0.14961	-0.93067	-0.00127
0.410668	0.438456	-0.68703	0.762009	-0.1819	0.210361	0.731377	-0.95357	1.03665	-1.02046	0.769067	0.463335	-1.13921	0.408095	-0.06321	1.55892	1.51109	1.76844	0.006249	0.106708	-0.63673	0.905416	1.153	-0.46496	-0.33345	-0.16217	0.15888	-0.04001	1.19737	-0.20049	0.099964	2.2554	-0.52679	-0.73345	-0.27712	1.48439	-0.14144	0.552092	-0.28647	-0.44728	0.062965	0.136397	-0.92168	0.316112	-0.69619	0.03143	0.526052	-0.16348	-0.95661	0.040387
0.538027	0.495496	-0.65968	0.796021	-0.09108	0.282523	0.830592	-0.91515	1.11069	-0.96036	0.756145	0.546131	-1.0932	0.475157	-0.04013	1.63623	1.4267	1.75253	0.107615	0.115957	-0.6225	0.923126	1.16175	-0.38612	-0.40737	-0.18013	0.229613	-0.01087	1.25599	-0.22435	0.125602	2.09417	-0.43606	-0.8657	-0.38568	1.52727	-0.10578	0.565412	-0.19351	-0.45478	0.058772	0.145669	-0.90904	0.264986	-0.68534	-0.03925	0.483421	-0.21473	-1.00012	0.07469
0.694638	0.547797	-0.63735	0.801514	0.022638	0.347557	0.871597	-0.8078	1.21657	-0.93736	0.700945	0.601432	-1.03633	0.569402	-0.01168	1.71249	1.37202	1.69642	0.229233	0.135599	-0.62625	0.915818	1.10539	-0.30663	-0.46565	-0.2709	0.308394	-0.04642	1.29508	-0.27327	0.204257	1.99563	-0.38149	-0.9249	-0.41691	1.50084	-0.08317	0.514742	-0.16711	-0.47271	0.041442	0.157674	-0.86641	0.27777	-0.71078	-0.09222	0.479086	-0.26677	-1.00423	0.027297
0.810858	0.610254	-0.60073	0.8378	0.166308	0.382607	0.908548	-0.75169	1.31627	-0.90823	0.664807	0.609382	-0.97487	0.658082	0.015255	1.79764	1.36289	1.60902	0.311907	0.229408	-0.61522	0.901805	1.10083	-0.29163	-0.50671	-0.33845	0.384498	-0.06749	1.32565	-0.36026	0.324134	1.86759	-0.19813	-0.86492	-0.52972	1.45327	-0.00167	0.409093	-0.09596	-0.49081	0.079323	0.145771	-0.78988	0.237027	-0.72699	-0.09078	0.471113	-0.29559	-1.05552	0.013514
0.874357	0.684601	-0.53845	0.881113	0.29814	0.422105	0.96439	-0.65054	1.47903	-0.86835	0.639415	0.644863	-0.91284	0.749613	0.09726	1.87404	1.34953	1.43192	0.356132	0.206108	-0.59542	0.877433	1.04486	-0.26172	-0.52945	-0.2045	0.469697	-0.03531	1.34569	-0.4085	0.48911	1.83559	-0.23448	-0.79418	-0.49954	1.40779	-0.02717	0.40739	0.07905	-0.49078	0.073254	0.070775	-0.71857	0.20356	-0.71351	-0.03969	0.537561	-0.29625	-1.021	-0.01969
0.896467	0.77717	-0.45894	0.888622	0.42871	0.434359	1.00522	-0.68748	1.60628	-0.80011	0.667045	0.638536	-0.85224	0.82118	0.204295	1.95849	1.33843	1.28602	0.381323	0.292397	-0.5857	0.870332	0.965244	-0.23624	-0.56891	-0.06069	0.562844	0.036755	1.33101	-0.4131	0.64378	1.76166	-0.19512	-0.7678	-0.52951	1.34152	-0.06505	0.431652	0.161539	-0.49002	0.065603	0.073074	-0.67925	0.238734	-0.7776	-0.01713	0.54243	-0.29989	-1.05561	0.0369
0.903312	0.856663	-0.40026	0.89972	0.547551	0.452068	0.991267	-0.63298	1.6774	-0.7576	0.69754	0.665501	-0.78884	0.834371	0.312123	1.99038	1.31772	1.15054	0.404646	0.408123	-0.58202	0.863274	0.98049	-0.2012	-0.58334	0.066163	0.640302	0.059047	1.27603	-0.42999	0.794089	1.7269	-0.19569	-0.68678	-0.48283	1.22691	-0.08171	0.416606	0.255513	-0.45227	0.038416	0.055932	-0.66336	0.318677	-0.86727	0.0269	0.630787	-0.30316	-1.02395	0.063295
0.907125	0.908794	-0.37278	0.912925	0.6242	0.457073	1.0286	-0.63184	1.67746	-0.7342	0.699557	0.725883	-0.73621	0.821526	0.388929	2.02513	1.24801	1.07481	0.486168	0.471843	-0.54796	0.858095	0.987389	-0.21982	-0.6113	0.110648	0.648866	0.062618	1.29726	-0.42042	0.910609	1.62945	-0.06325	-0.66654	-0.51867	1.11734	-0.09145	0.410779	0.267862	-0.45342	0.007724	0.085445	-0.65337	0.344842	-0.92694	0.021098	0.59892	-0.35041	-1.02571	0.100069
0.917814	0.897252	-0.35621	0.901322	0.664249	0.477597	1.07887	-0.58498	1.66467	-0.7492	0.712372	0.79942	-0.68472	0.780237	0.430681	2.0279	1.20431	1.0181	0.570068	0.472393	-0.48015	0.860294	1.07356	-0.23945	-0.59736	0.157581	0.597084	0.003434	1.30175	-0.45983	0.993678	1.53802	-0.01865	-0.60831	-0.52529	1.09628	-0.05017	0.346112	0.381638	-0.4008	0.041611	-0.0067	-0.62298	0.339151	-0.8966	0.083566	0.67982	-0.3641	-0.96198	0.122061
0.965074	0.884721	-0.35168	0.913756	0.682029	0.469926	1.16082	-0.52845	1.63244	-0.74417	0.706236	0.892373	-0.65866	0.760026	0.441049	2.05047	1.14712	0.954859	0.6934	0.462308	-0.42209	0.882963	1.06002	-0.24646	-0.59932	0.193971	0.545646	-0.01583	1.29617	-0.42454	1.0479	1.42579	0.040499	-0.62083	-0.55177	1.06115	-0.04352	0.300127	0.382332	-0.38779	0.044914	0.013486	-0.57979	0.252447	-0.88093	0.102421	0.638019	-0.38471	-0.89776	0.112567
1.00869	0.856686	-0.33402	0.898754	0.69202	0.468159	1.23053	-0.5028	1.58203	-0.73656	0.747183	0.930587	-0.62945	0.719566	0.45537	2.0646	1.13633	0.929249	0.759803	0.467188	-0.3596	0.899634	1.1237	-0.24542	-0.6243	0.161181	0.551063	-0.03902	1.29432	-0.44708	1.09074	1.35824	0.038034	-0.55156	-0.48004	1.01237	0.061346	0.258664	0.423683	-0.31645	0.063477	-0.04578	-0.49644	0.240381	-0.89539	0.166406	0.6688	-0.38163	-0.84653	0.125302
1.05486	0.874334	-0.3318	0.895028	0.704079	0.491498	1.30408	-0.49619	1.50973	-0.71468	0.74248	0.990632	-0.6191	0.700407	0.479616	2.08547	1.06576	0.886699	0.820495	0.433996	-0.28253	0.900394	1.13446	-0.21383	-0.63542	0.142734	0.573917	-0.03674	1.2967	-0.38783	1.15489	1.27048	0.098741	-0.54536	-0.44324	0.929555	-0.00542	0.214532	0.396385	-0.31757	0.059102	-0.07404	-0.54504	0.168802	-0.91139	0.131415	0.620159	-0.38713	-0.84431	0.16792
1.10243	0.863064	-0.30191	0.826917	0.722913	0.548387	1.39419	-0.49794	1.45928	-0.68913	0.76469	0.963785	-0.59036	0.679261	0.521541	2.09099	0.994245	0.863265	0.851305	0.313277	-0.22191	0.899313	1.20665	-0.13926	-0.60988	0.082738	0.585577	-0.03746	1.27364	-0.36785	1.25939	1.17118	0.1422	-0.53568	-0.41548	0.897317	-0.05905	0.145036	0.377193	-0.29685	0.019711	-0.08036	-0.53704	0.183377	-0.89471	0.084728	0.563945	-0.41047	-0.8175	0.181463
1.19667	0.886781	-0.28272	0.798605	0.731933	0.622615	1.4021	-0.51387	1.4163	-0.65509	0.726211	1.01656	-0.57045	0.674457	0.543314	2.05128	0.929688	0.78714	0.85712	0.331389	-0.19451	0.896871	1.24561	-0.07738	-0.54065	0.144569	0.629508	-0.0213	1.19657	-0.35781	1.36151	1.0685	0.184068	-0.51749	-0.40104	0.809342	-0.09041	0.035583	0.311378	-0.27618	-0.01528	-0.0353	-0.51504	0.159899	-0.86	0.046906	0.535365	-0.38971	-0.79395	0.204615
1.24238	0.907184	-0.25048	0.761803	0.730713	0.659045	1.40632	-0.47336	1.39339	-0.60798	0.734154	1.1253	-0.54191	0.632446	0.599054	2.00223	0.862221	0.690521	0.856433	0.344213	-0.16508	0.902724	1.28162	-0.09155	-0.5136	0.156826	0.683689	-0.01513	1.12994	-0.35186	1.42654	1.00412	0.175158	-0.5323	-0.29736	0.783195	-0.08793	-0.0851	0.297298	-0.24559	-0.05494	0.039007	-0.42355	0.222262	-0.86298	0.023193	0.452057	-0.37193	-0.70836	0.14425
1.27182	0.946955	-0.22437	0.774208	0.72505	0.698158	1.39627	-0.49342	1.37118	-0.55579	0.747014	1.33071	-0.51956	0.611242	0.652104	1.96412	0.827163	0.620465	0.9103	0.442435	-0.16396	0.909111	1.30623	-0.07438	-0.47275	0.165324	0.730749	0.011745	1.10803	-0.37271	1.49602	0.964169	0.205877	-0.44242	-0.122	0.663914	-0.04257	-0.16326	0.24033	-0.20892	-0.06625	0.022796	-0.4019	0.243243	-0.8434	0.066094	0.428038	-0.35093	-0.67964	0.078053
1.29585	0.969243	-0.19237	0.764619	0.734596	0.716156	1.45215	-0.44897	1.35194	-0.50564	0.790456	1.49805	-0.50185	0.582648	0.732289	1.97272	0.75826	0.572144	1.05935	0.431539	-0.16394	0.905614	1.32687	-0.07894	-0.49597	0.145002	0.725374	0.011932	1.08663	-0.33476	1.56208	0.903642	0.195228	-0.46697	-0.08273	0.656185	-0.02419	-0.22464	0.225915	-0.22393	-0.0745	0.059086	-0.42197	0.237222	-0.85938	0.077986	0.321173	-0.34709	-0.63124	0.120003
1.31549	0.977379	-0.1456	0.806602	0.759646	0.74873	1.52197	-0.46142	1.34459	-0.45153	0.86598	1.72298	-0.47916	0.589914	0.79299	1.99173	0.72857	0.569356	1.20726	0.512193	-0.20999	0.923794	1.42891	-0.01799	-0.46757	0.161736	0.711649	0.069173	1.05658	-0.34596	1.64533	0.847547	0.231181	-0.36465	-0.09884	0.554898	0.147155	-0.21887	0.182457	-0.21475	-0.09075	0.078992	-0.46832	0.210782	-0.87952	0.092224	0.321898	-0.34368	-0.60296	0.105534
1.37223	0.994566	-0.11384	0.805351	0.77608	0.763405	1.62711	-0.44634	1.35926	-0.4219	0.923676	1.90363	-0.46613	0.556078	0.840708	2.01481	0.68415	0.552751	1.27624	0.384048	-0.19685	0.947395	1.42177	-0.02194	-0.47929	0.159901	0.705264	0.08446	1.05214	-0.32448	1.68006	0.781655	0.226049	-0.3683	-0.09284	0.538005	0.222481	-0.21168	0.194269	-0.21722	-0.07467	0.076001	-0.46205	0.188053	-0.87803	0.072547	0.291191	-0.31429	-0.56862	0.182659
1.39418	1.00928	-0.06488	0.83096	0.783117	0.791471	1.70995	-0.44276	1.33536	-0.40596	0.973617	2.17891	-0.44296	0.526279	0.856513	1.99137	0.638799	0.528254	1.27042	0.385451	-0.17756	1.00187	1.43178	0.029983	-0.41946	0.126381	0.7157	0.106845	1.0731	-0.30741	1.7427	0.735588	0.22009	-0.32928	-0.01932	0.494287	0.267456	-0.26539	0.141641	-0.18756	-0.06751	0.022719	-0.4984	0.194355	-0.87435	0.061093	0.316806	-0.27719	-0.53502	0.123515
1.41779	1.02493	-0.02262	0.800938	0.788255	0.803565	1.77978	-0.42625	1.30364	-0.41294	0.996292	2.29056	-0.43792	0.464115	0.863729	1.99014	0.587118	0.505795	1.26089	0.277898	-0.15614	0.992617	1.37444	0.139424	-0.36543	0.132716	0.746315	0.097299	1.06146	-0.2339	1.81409	0.688565	0.155439	-0.32258	0.061388	0.502026	0.210732	-0.28553	0.144701	-0.1268	-0.03068	-0.04452	-0.47301	0.165033	-0.81712	0.091301	0.331114	-0.20206	-0.47623	0.191852
1.41808	1.05042	0.043583	0.818425	0.780942	0.838452	1.79314	-0.42966	1.2844	-0.38044	1.03367	2.42825	-0.42609	0.425132	0.886458	1.95933	0.530557	0.466321	1.31613	0.410041	-0.16863	0.962033	1.40131	0.260777	-0.32234	0.164141	0.804622	0.136322	1.00541	-0.11374	1.8491	0.657018	0.017698	-0.34069	0.052525	0.491101	0.258681	-0.31237	0.125849	-0.0735	-0.02954	-0.09655	-0.48479	0.212348	-0.78336	0.092981	0.334222	-0.09831	-0.40421	0.203709
1.38985	1.09605	0.099917	0.817776	0.80305	0.863196	1.79809	-0.43438	1.3133	-0.35527	1.1076	2.4226	-0.42581	0.355368	0.893678	1.93796	0.492674	0.442597	1.3839	0.490011	-0.21207	0.916984	1.45101	0.375956	-0.23123	0.209981	0.887937	0.145433	0.966228	0.034318	1.8558	0.594597	0.085676	-0.19883	0.048291	0.382366	0.254904	-0.27873	0.157069	-0.03221	-0.01756	-0.15955	-0.4336	0.15389	-0.73339	0.134366	0.33743	-0.01342	-0.34217	0.249152
1.38695	1.13979	0.157953	0.803012	0.792319	0.908712	1.85327	-0.43594	1.3347	-0.31815	1.16169	2.40749	-0.4124	0.303822	0.89627	1.89373	0.436891	0.386825	1.40149	0.478151	-0.21359	0.906796	1.46485	0.400098	-0.20971	0.131566	0.979771	0.17094	0.959152	0.143574	1.86293	0.528293	0.100327	-0.14523	0.032767	0.340985	0.249595	-0.30895	0.11325	-0.03029	0.007186	-0.17271	-0.40004	0.22854	-0.73399	0.094139	0.351949	0.095623	-0.2944	0.293222
1.34207	1.17793	0.199783	0.764713	0.834675	0.924282	1.92922	-0.39101	1.33586	-0.3102	1.2123	2.32555	-0.40206	0.257184	0.891413	1.89733	0.404297	0.353977	1.38804	0.411737	-0.20367	0.900633	1.47592	0.436291	-0.20789	0.09713	1.02361	0.174655	0.993189	0.194049	1.90195	0.469494	0.174116	-0.13749	0.038825	0.315447	0.204016	-0.28481	0.112771	-0.02322	0.007704	-0.18203	-0.36006	0.114555	-0.68704	0.084087	0.369266	0.134774	-0.28063	0.334299
1.36057	1.20856	0.251604	0.727704	0.863473	0.971281	2.00429	-0.40009	1.33836	-0.29071	1.24513	2.24965	-0.37971	0.2447	0.912804	1.90563	0.401243	0.285761	1.39719	0.322783	-0.15255	0.902133	1.41665	0.473917	-0.17529	9.81e-05	1.03803	0.204899	0.961021	0.198021	1.94354	0.447272	0.162594	-0.18961	0.091748	0.394887	0.168473	-0.23521	0.067808	-0.0016	0.042301	-0.14711	-0.32758	0.148825	-0.67352	0.02304	0.399256	0.169521	-0.27888	0.299196
1.37334	1.23428	0.297082	0.723708	0.900737	0.996515	2.0265	-0.39335	1.32834	-0.28945	1.29078	2.23438	-0.36787	0.232066	0.911874	1.87766	0.407177	0.264096	1.44966	0.385449	-0.1072	0.886791	1.38109	0.537847	-0.15103	0.008084	1.07504	0.1959	0.967807	0.234269	1.94488	0.431958	0.166319	-0.19887	0.178001	0.358704	0.103982	-0.19444	0.005611	-0.00124	0.018671	-0.16888	-0.38854	0.035491	-0.68265	0.024056	0.388625	0.171154	-0.26128	0.280129
1.43237	1.26763	0.36003	0.734062	0.899994	1.03647	2.02221	-0.42804	1.3293	-0.27433	1.33261	2.23455	-0.34634	0.231574	0.915528	1.85625	0.436159	0.240317	1.55906	0.482349	-0.05588	0.86198	1.35316	0.5075	-0.11681	-0.0099	1.09713	0.231493	0.943773	0.293062	1.95536	0.356631	0.205049	-0.18117	0.188771	0.316989	0.070629	-0.15992	-0.02387	0.028567	0.181906	-0.11609	-0.39349	-0.02453	-0.70744	-0.02428	0.403221	0.214076	-0.25403	0.259217
1.43678	1.31131	0.418824	0.724355	0.889201	1.05785	2.02422	-0.39244	1.3419	-0.27808	1.36195	2.22192	-0.33695	0.186158	0.895523	1.80919	0.437948	0.19295	1.6648	0.457663	-0.0079	0.827171	1.29153	0.489896	-0.15546	0.047651	1.16564	0.227156	0.924367	0.342944	1.95188	0.270476	0.167765	-0.20455	0.182549	0.261768	0.052719	-0.19219	0.024252	0.056563	0.272752	-0.07114	-0.42755	-0.00514	-0.67651	-0.05949	0.42623	0.325311	-0.18951	0.316251
1.42751	1.35761	0.480896	0.7695	0.905472	1.08028	2.08119	-0.34927	1.36245	-0.28279	1.39708	2.21769	-0.31899	0.141294	0.908987	1.7626	0.456449	0.165132	1.80271	0.448236	0.008836	0.838685	1.27153	0.501761	-0.12108	0.090427	1.21779	0.22414	0.892339	0.408702	1.97877	0.185731	0.145572	-0.19882	0.126599	0.260146	0.117795	-0.18629	0.108107	0.136867	0.352354	-0.02606	-0.42677	0.018367	-0.63849	-0.07678	0.474183	0.397628	-0.07714	0.356009
1.4344	1.40401	0.549973	0.792122	0.948015	1.09536	2.14385	-0.2906	1.3908	-0.2898	1.42014	2.23963	-0.29974	0.118537	0.944601	1.72416	0.464514	0.071642	1.88957	0.371146	0.043257	0.85932	1.18832	0.590578	-0.07557	0.054064	1.29558	0.198104	0.85653	0.428981	2.06126	0.144526	0.094133	-0.17896	0.156042	0.253585	0.064419	-0.24886	0.103174	0.185634	0.302268	-0.01189	-0.42593	0.058027	-0.65978	-0.08758	0.525451	0.484674	0.048645	0.365349
1.50712	1.45118	0.615424	0.886554	0.982395	1.11146	2.21232	-0.24513	1.39048	-0.26606	1.4972	2.37671	-0.26785	0.154558	0.999279	1.72264	0.503749	0.098286	1.98906	0.421083	0.08007	0.888342	1.15459	0.673342	-0.00101	-0.01043	1.34054	0.227599	0.862592	0.442469	2.16784	0.141311	0.042282	-0.12354	0.214275	0.210688	0.133248	-0.2647	0.010731	0.265348	0.282913	0.040137	-0.47424	-0.04984	-0.66807	-0.09362	0.592779	0.534043	0.187897	0.315997
1.62792	1.50388	0.687519	0.929207	1.00427	1.15414	2.26127	-0.20233	1.40675	-0.25062	1.53697	2.46917	-0.24212	0.157196	1.03426	1.75711	0.548131	0.074582	2.04514	0.45126	0.107541	0.88571	1.10828	0.72667	0.062354	-0.03632	1.34638	0.24982	0.840179	0.406526	2.24452	0.115609	0.110659	-0.10895	0.308797	0.187501	0.113556	-0.25764	-0.08263	0.289051	0.264549	0.066806	-0.43005	-0.08276	-0.67512	-0.13214	0.614366	0.596065	0.228208	0.31105
1.72685	1.55678	0.735408	0.984557	1.00182	1.20268	2.3082	-0.16248	1.39766	-0.23532	1.58513	2.49755	-0.22299	0.154106	1.01155	1.73411	0.572746	0.125974	2.08289	0.503026	0.136998	0.892083	1.09787	0.771738	0.13227	-0.01921	1.37739	0.22645	0.809773	0.440738	2.28757	0.104834	0.178344	-0.05043	0.31127	0.127949	0.193952	-0.24257	-0.06255	0.31388	0.21764	0.081659	-0.45643	-0.01986	-0.62887	-0.12139	0.638501	0.670578	0.274286	0.272711
1.74057	1.5771	0.792426	0.968505	1.03387	1.22944	2.32504	-0.12893	1.41132	-0.23208	1.58834	2.43386	-0.20356	0.12654	1.02203	1.71284	0.540498	0.048014	2.0776	0.52711	0.132861	0.90649	1.06258	0.794688	0.186173	-0.00494	1.39147	0.198438	0.722227	0.506101	2.27597	0.08122	0.218709	-0.17004	0.245671	0.164642	0.149934	-0.23327	-0.02308	0.296803	0.170005	0.0932	-0.3698	0.109862	-0.60101	-0.16552	0.624574	0.760957	0.248159	0.346806
1.75933	1.59161	0.842364	0.932702	1.07811	1.24007	2.30516	-0.06393	1.44907	-0.17882	1.59792	2.39651	-0.16495	0.147042	1.03025	1.69076	0.49671	0.028728	2.0656	0.540844	0.164476	0.929906	0.954396	0.860649	0.232198	-0.00782	1.41981	0.221127	0.675803	0.585727	2.25767	0.074991	0.21638	-0.17407	0.183789	0.083415	0.145702	-0.24283	0.029272	0.342934	0.148242	0.191503	-0.33221	0.213133	-0.59816	-0.19053	0.63806	0.892333	0.287799	0.308932
1.75779	1.61499	0.894478	0.940285	1.15818	1.26234	2.3068	-0.04451	1.48377	-0.14665	1.61035	2.35879	-0.12181	0.157844	1.06722	1.70927	0.433999	-0.02012	2.0135	0.604285	0.184119	0.970589	0.879812	0.932721	0.291494	0.032207	1.41344	0.264721	0.65156	0.602131	2.23331	0.084792	0.172185	-0.18703	0.227308	0.041026	0.151043	-0.26838	0.040017	0.360782	0.125248	0.282108	-0.27633	0.19395	-0.58155	-0.20205	0.66693	0.972823	0.337263	0.363016
1.80129	1.64655	0.950981	0.969961	1.2648	1.30443	2.3213	0.026313	1.55441	-0.11269	1.64459	2.27972	-0.08089	0.165669	1.07187	1.72119	0.410593	0.010326	1.99501	0.698922	0.194742	0.988364	0.840656	0.988995	0.369785	0.078075	1.40427	0.326013	0.656704	0.596416	2.20045	0.058498	0.229911	-0.12966	0.274977	-0.05097	0.188697	-0.24265	0.044481	0.368306	0.098341	0.37644	-0.23889	0.174178	-0.58651	-0.14508	0.634631	1.00269	0.385804	0.305776
1.82261	1.67766	0.992496	1.0549	1.34242	1.35293	2.32712	0.10402	1.60642	-0.09801	1.68607	2.17912	-0.04511	0.158773	1.07885	1.71009	0.377612	0.016092	1.97831	0.840916	0.221342	0.981836	0.848768	0.979635	0.457772	0.002044	1.39274	0.367612	0.619982	0.579276	2.14527	0.053745	0.229778	-0.17595	0.42721	-0.06303	0.233686	-0.24675	0.039179	0.33952	0.078159	0.391243	-0.19067	0.106831	-0.55209	-0.14153	0.60933	0.966191	0.395688	0.239482
1.84564	1.70534	1.04439	1.07039	1.38338	1.39396	2.37505	0.246874	1.69839	-0.0688	1.73308	2.18034	-0.00055	0.139296	1.07354	1.6625	0.378045	-0.02327	1.97357	0.918374	0.250592	0.9249	0.88161	0.939803	0.575373	-0.07075	1.35402	0.396579	0.548285	0.569265	1.99309	0.044531	0.2806	-0.25045	0.455747	-0.03215	0.330601	-0.21543	0.040135	0.316774	0.118982	0.40414	-0.16527	0.174851	-0.52274	-0.15275	0.505676	0.945918	0.362919	0.15347
1.88026	1.73639	1.07487	1.09513	1.35043	1.43655	2.37225	0.357366	1.74402	-0.05182	1.74066	2.16871	0.028233	0.116328	1.05028	1.65052	0.385557	-0.08108	1.93004	0.993163	0.34245	0.882696	0.901861	0.921493	0.721247	-0.18518	1.30858	0.35835	0.461093	0.662168	1.8546	0.081539	0.226851	-0.21685	0.414351	-0.02987	0.393028	-0.21463	0.035911	0.310834	0.175194	0.402422	-0.20335	0.212215	-0.54265	-0.23205	0.340796	0.93017	0.354531	0.120261
1.92606	1.77366	1.12129	1.08469	1.3579	1.45367	2.32766	0.414773	1.78215	-0.03037	1.74706	2.18843	0.061705	0.093364	1.06335	1.69294	0.424853	-0.12329	1.8578	1.10089	0.42952	0.853586	0.934762	0.927307	0.771339	-0.10988	1.22107	0.341039	0.347365	0.737684	1.73815	0.126099	0.123028	-0.16295	0.297126	-0.05056	0.457202	-0.16396	0.120929	0.317481	0.219853	0.3977	-0.2991	0.262084	-0.48608	-0.29312	0.251747	0.953882	0.348633	0.168463
1.99704	1.78559	1.15131	1.06398	1.33353	1.47707	2.23693	0.491544	1.79484	-0.02129	1.77862	2.09153	0.080035	0.079076	1.059	1.6872	0.477058	-0.10809	1.78649	1.11487	0.471266	0.856268	0.90874	0.955054	0.793331	-0.057	1.18657	0.309137	0.259549	0.873389	1.64082	0.181439	-0.02654	-0.11122	0.246791	-0.06049	0.438602	-0.08628	0.071528	0.397857	0.259688	0.407317	-0.46121	0.208241	-0.49686	-0.35372	0.177397	0.954985	0.389725	0.171019
2.06076	1.81279	1.18682	1.03719	1.34065	1.5152	2.19929	0.555637	1.79413	-0.0075	1.82596	2.04297	0.108823	0.09241	1.08619	1.65177	0.503394	-0.02735	1.75421	1.10984	0.524456	0.840066	0.93908	0.961156	0.714883	0.036111	1.13582	0.28934	0.176779	0.894462	1.53631	0.191724	-0.11843	-0.12482	0.264587	-0.01548	0.498462	-0.02245	0.033129	0.455222	0.298137	0.404419	-0.56619	0.188646	-0.49298	-0.38041	0.212429	0.96204	0.406703	0.214224
2.11467	1.85578	1.22518	1.02287	1.33766	1.5499	2.25941	0.653648	1.82047	0.023558	1.86306	2.01782	0.13833	0.152776	1.08888	1.61041	0.535097	-0.00917	1.73582	1.12017	0.551628	0.822626	0.91744	0.980421	0.689663	-0.01243	1.10667	0.286355	0.142359	0.959391	1.41204	0.228345	-0.23145	-0.1538	0.254753	0.058759	0.559587	0.005651	0.04558	0.521089	0.293866	0.456121	-0.64828	0.124163	-0.51609	-0.3802	0.172123	0.96067	0.367575	0.146075
2.16914	1.91186	1.25836	1.04856	1.37324	1.5863	2.35106	0.774696	1.871	0.054062	1.84761	2.04893	0.176748	0.237992	1.12719	1.62144	0.527621	0.04485	1.68223	1.12694	0.599282	0.794565	0.961493	1.00622	0.628469	-0.05557	1.0685	0.290887	0.138098	0.947477	1.30872	0.212721	-0.28494	-0.10902	0.283396	0.051404	0.639582	0.004447	0.108486	0.520239	0.219343	0.459637	-0.67519	0.089952	-0.52257	-0.386	0.271	0.989106	0.333458	0.215406
2.22533	1.95669	1.28824	1.06298	1.41893	1.57198	2.4022	0.915891	1.90444	0.081039	1.82026	2.0762	0.212714	0.3284	1.10962	1.62314	0.529575	0.024111	1.57089	1.11216	0.594228	0.766627	0.887053	1.00706	0.55091	-0.08437	1.03838	0.265455	0.209188	1.0232	1.2538	0.207505	-0.36574	-0.13659	0.275412	0.057245	0.636561	0.043299	0.138086	0.524654	0.13501	0.446364	-0.71625	0.012904	-0.49933	-0.3994	0.33347	1.07217	0.317226	0.221703
2.2661	1.9759	1.3224	1.10028	1.47853	1.57366	2.39378	1.03609	1.92142	0.102188	1.80902	2.06982	0.241087	0.393992	1.11147	1.6285	0.5349	0.056658	1.5089	1.01082	0.600415	0.727277	0.8665	1.00617	0.52642	-0.0937	1.00772	0.233057	0.274435	1.01761	1.23596	0.178414	-0.36673	-0.09591	0.221414	-0.02593	0.626339	0.104766	0.119526	0.507106	0.045151	0.347199	-0.75053	0.003036	-0.48474	-0.41096	0.523161	1.15799	0.323406	0.285501
2.24872	1.9992	1.34388	1.12502	1.55409	1.56354	2.32864	1.10812	1.91293	0.122067	1.8035	1.96447	0.264763	0.45938	1.0889	1.6267	0.482882	0.0294	1.48248	1.01838	0.621333	0.704355	0.754399	0.989338	0.497812	0.01902	0.987392	0.186123	0.309427	1.08045	1.244	0.150882	-0.36588	-0.14692	0.230378	-0.06119	0.573278	0.078433	0.173728	0.461438	0.006741	0.229564	-0.7695	0.025422	-0.51463	-0.47205	0.599979	1.20867	0.310892	0.287739
2.24207	1.99844	1.37258	1.15376	1.61078	1.60057	2.25138	1.12027	1.91866	0.16309	1.80426	1.88621	0.304071	0.499782	1.11423	1.60613	0.440009	0.02297	1.52279	1.13575	0.644965	0.700288	0.852478	1.03767	0.517195	0.092038	0.967637	0.202863	0.324719	1.09008	1.19974	0.141518	-0.34884	-0.12539	0.263052	-0.15841	0.585073	0.023864	0.268029	0.397228	-0.05503	0.116405	-0.78239	0.071424	-0.50931	-0.503	0.596202	1.19924	0.315406	0.233012
2.20879	1.98787	1.37996	1.15854	1.60307	1.62843	2.2123	1.14875	1.89294	0.19222	1.78431	1.78984	0.343959	0.524503	1.11331	1.56349	0.362971	-0.01788	1.51042	1.16944	0.676856	0.710106	0.909996	1.06263	0.51489	0.13558	0.958056	0.211314	0.326037	1.17249	1.09123	0.050403	-0.2015	-0.18513	0.350504	-0.17824	0.616506	-0.00725	0.35372	0.319087	-0.09058	0.057293	-0.78061	0.079759	-0.53486	-0.56982	0.372993	1.17827	0.314456	0.186518
2.17417	1.94391	1.42183	1.13178	1.60688	1.66509	2.25652	1.1926	1.83821	0.220648	1.76982	1.76437	0.391587	0.540257	1.12791	1.55124	0.405675	0.028206	1.48857	1.15748	0.738406	0.706505	1.06237	1.16774	0.614868	0.079093	0.846437	0.243864	0.331842	1.17064	0.980361	0.031482	-0.14911	-0.10719	0.404932	-0.22435	0.650249	0.064527	0.336865	0.310267	-0.1199	0.104751	-0.78835	0.061641	-0.4924	-0.52032	0.151108	1.19034	0.344917	0.032527
2.12437	1.92264	1.4567	1.13076	1.61212	1.68335	2.33822	1.26505	1.796	0.231531	1.74037	1.69839	0.425907	0.566112	1.12041	1.56783	0.476893	0.018783	1.44552	1.07463	0.796211	0.695776	1.10547	1.22489	0.656329	0.084714	0.74849	0.273112	0.302673	1.15376	0.845102	-0.00802	-0.06791	-0.05553	0.443851	-0.26101	0.64401	0.071001	0.382391	0.333137	-0.08131	0.083769	-0.82429	0.048408	-0.48277	-0.50979	0.025167	1.20629	0.312539	-0.07669
2.13008	1.90315	1.49456	1.10932	1.66619	1.71412	2.40342	1.34989	1.79211	0.228709	1.69883	1.62465	0.45862	0.604211	1.11205	1.53419	0.556609	0.008895	1.37734	1.03705	0.826905	0.679375	1.15209	1.29437	0.703458	0.144637	0.657465	0.270834	0.291466	1.12627	0.748789	0.036149	-0.17182	0.015355	0.422615	-0.24773	0.58363	0.03629	0.36862	0.385467	-0.03836	0.076332	-0.81686	0.046602	-0.46455	-0.43342	-0.00877	1.23002	0.269097	-0.12762
2.16014	1.90581	1.52798	1.13047	1.68486	1.74276	2.40638	1.38122	1.76601	0.256823	1.63884	1.55595	0.485071	0.660624	1.11131	1.52294	0.603674	-0.05026	1.34333	1.03191	0.846953	0.650258	1.20298	1.32216	0.697622	0.209651	0.610628	0.240176	0.238928	1.13283	0.612147	0.016056	-0.13906	-0.03782	0.368721	-0.25132	0.604282	-0.02582	0.392932	0.414015	-0.04368	0.009656	-0.81074	0.037512	-0.45492	-0.40532	-0.05705	1.21805	0.181383	-0.10347
2.1715	1.9196	1.55379	1.09787	1.7089	1.76514	2.41072	1.43603	1.71474	0.302736	1.57282	1.4951	0.508823	0.706046	1.11291	1.4928	0.595201	-0.01521	1.31596	0.951849	0.89416	0.615284	1.24618	1.3316	0.73475	0.165629	0.557231	0.196701	0.176205	1.16108	0.502745	0.002885	-0.1385	-0.0237	0.373857	-0.25905	0.603942	-0.09714	0.308872	0.428371	-0.04956	0.030484	-0.77382	0.046133	-0.44629	-0.31802	-0.08286	1.19735	0.165597	-0.035
2.15198	1.9299	1.57506	1.09543	1.70494	1.79539	2.39458	1.45222	1.62277	0.359126	1.49321	1.46905	0.543455	0.768955	1.12859	1.50945	0.594013	-0.00732	1.32728	0.891599	0.925274	0.573811	1.32166	1.32704	0.755822	0.156619	0.493931	0.16811	0.08494	1.17071	0.367653	-0.0409	-0.0493	-0.07448	0.381654	-0.23306	0.675882	-0.15542	0.310715	0.415224	-0.09203	0.072966	-0.72199	0.024628	-0.43746	-0.27791	-0.14591	1.1856	0.157908	-0.01304
2.17091	1.93451	1.58206	1.09134	1.73246	1.8073	2.36535	1.54703	1.58802	0.39577	1.44256	1.42199	0.589986	0.800364	1.12293	1.47811	0.557787	0.010984	1.32824	0.772916	0.919662	0.555504	1.27378	1.28087	0.707409	0.127334	0.457886	0.221729	0.067882	1.14732	0.277087	-0.08156	-0.05668	-0.10189	0.309803	-0.17212	0.623848	-0.14135	0.340461	0.429654	-0.06563	0.031603	-0.66696	0.008886	-0.45469	-0.2925	-0.09351	1.13971	0.18243	0.000255
2.17756	1.9095	1.58674	1.10235	1.7645	1.81649	2.35286	1.63947	1.53274	0.413153	1.42032	1.40186	0.658283	0.867664	1.12954	1.46895	0.578408	-0.01975	1.29944	0.759006	0.938105	0.533884	1.25555	1.29978	0.679815	0.171961	0.405594	0.243675	0.034475	1.14047	0.220241	-0.09869	-0.02631	-0.1182	0.170623	-0.13716	0.577944	-0.09111	0.44736	0.466454	-0.01838	0.085583	-0.64803	-0.03212	-0.49646	-0.30579	-0.09532	1.12812	0.170711	0.047184
2.21699	1.91592	1.6082	1.10637	1.79923	1.79878	2.30318	1.71102	1.48609	0.453808	1.42857	1.30608	0.716438	0.894294	1.10272	1.44262	0.596829	-0.01245	1.26327	0.767356	0.990103	0.537302	1.12285	1.30587	0.619532	0.175969	0.374385	0.255581	0.024087	1.11582	0.212261	-0.11219	-0.00243	0.006563	0.13191	-0.22336	0.481436	-0.02174	0.45501	0.489038	0.073761	0.103664	-0.62824	-0.11972	-0.55596	-0.29196	-0.02562	1.0975	0.160965	0.027654
2.2007	1.89308	1.61619	1.06275	1.80722	1.80494	2.28622	1.68321	1.43269	0.480049	1.40811	1.22499	0.764383	0.898248	1.1029	1.42213	0.572377	0.007526	1.2025	0.825989	1.00671	0.527024	1.07455	1.29815	0.62922	0.185355	0.360505	0.238946	-0.05347	1.14449	0.223565	-0.12064	0.008143	0.044139	0.115061	-0.28006	0.45225	-0.02824	0.508332	0.47995	0.183668	0.135003	-0.56938	-0.14625	-0.5836	-0.25809	-0.06633	1.11538	0.129052	0.139077
2.20956	1.89296	1.63146	1.06588	1.81558	1.81733	2.2515	1.61288	1.43576	0.522159	1.34939	1.16494	0.785288	0.909411	1.10432	1.36824	0.550262	0.058898	1.14715	0.880077	1.02271	0.515481	0.997386	1.23661	0.620258	0.158299	0.36634	0.269625	-0.09315	1.12864	0.212522	-0.128	-0.02883	-0.00322	0.205729	-0.2904	0.492602	0.041367	0.541431	0.436123	0.240514	0.091127	-0.48129	-0.1327	-0.5715	-0.2381	-0.12891	1.07477	0.084801	0.137037
2.17739	1.89249	1.63789	1.06318	1.86131	1.82261	2.2592	1.5776	1.4664	0.556341	1.31368	1.1545	0.803058	0.932353	1.11986	1.33251	0.519298	0.094305	1.10506	0.9182	1.02332	0.475982	1.05323	1.1873	0.604593	0.175619	0.356631	0.313029	-0.0978	1.11902	0.216666	-0.15513	-0.09953	-0.13283	0.215792	-0.24509	0.531983	0.071562	0.590971	0.423829	0.287198	0.072246	-0.47319	-0.03396	-0.61058	-0.26225	-0.1879	1.0715	0.088757	0.213893
2.10095	1.92864	1.64695	1.07689	1.92938	1.80128	2.27592	1.6043	1.49051	0.621175	1.28456	1.13051	0.831056	0.96747	1.12127	1.30284	0.539114	0.106724	1.06133	0.899643	1.05528	0.453942	1.10268	1.14495	0.612004	0.168512	0.327448	0.346346	-0.08271	1.11237	0.197146	-0.18144	-0.14114	-0.11947	0.324376	-0.22061	0.554109	0.115536	0.685828	0.36603	0.299501	0.090326	-0.51565	0.004124	-0.64144	-0.25132	-0.26701	1.02378	0.102889	0.156109
2.03334	1.93483	1.64663	1.05942	1.9659	1.7658	2.27895	1.69728	1.5074	0.661334	1.30209	1.07864	0.863972	0.962255	1.08743	1.2638	0.512028	0.135338	1.03163	0.931695	1.06417	0.445405	1.14225	1.13849	0.600369	0.166589	0.302279	0.324929	-0.06461	1.13992	0.16458	-0.20815	-0.23107	-0.08767	0.466915	-0.25399	0.518238	0.064254	0.703476	0.326568	0.293397	0.095179	-0.56192	-0.00828	-0.6725	-0.27402	-0.31712	0.980067	0.109706	0.165117
1.96011	1.92694	1.63502	1.03354	1.98826	1.73472	2.27174	1.81201	1.51409	0.686523	1.29097	1.0421	0.90019	0.96719	1.08755	1.22406	0.498877	0.176357	0.985469	0.903208	1.0783	0.442993	1.12444	1.13862	0.622149	0.178925	0.276142	0.298129	-0.11048	1.15949	0.127025	-0.22643	-0.24739	-0.01341	0.569249	-0.29775	0.458986	0.119528	0.736037	0.272183	0.303866	0.098305	-0.59849	-0.04697	-0.6631	-0.27768	-0.38323	0.882896	0.102456	0.146401
1.92054	1.94118	1.64734	1.0821	2.01579	1.7046	2.25857	1.83597	1.54853	0.734387	1.28188	1.03178	0.932313	0.990364	1.10675	1.21534	0.465233	0.199495	0.955091	0.888913	1.10215	0.435392	1.08532	1.12839	0.576435	0.17182	0.226141	0.290194	-0.11723	1.15589	0.109905	-0.23097	-0.30098	-0.04772	0.611876	-0.31523	0.401734	0.131748	0.683272	0.258115	0.322342	0.078849	-0.61453	-0.14815	-0.63249	-0.31173	-0.42084	0.786049	0.079413	0.165547
1.89861	1.97193	1.66065	1.07323	2.08577	1.68447	2.22119	1.85048	1.55002	0.784323	1.27177	1.02883	0.952208	1.00626	1.1352	1.20291	0.461749	0.175526	0.91697	0.728448	1.09767	0.424113	0.997281	1.11729	0.563274	0.227144	0.237048	0.306241	-0.11419	1.09929	0.167918	-0.26357	-0.25171	-0.00357	0.508061	-0.30114	0.270173	0.206751	0.692057	0.265705	0.335916	0.057225	-0.62092	-0.18385	-0.62931	-0.31052	-0.43236	0.720455	0.095359	0.145992
1.85043	2.00267	1.69101	1.06297	2.1303	1.70121	2.20116	1.80233	1.57377	0.841734	1.28824	0.987834	0.964409	1.03365	1.12983	1.19605	0.397857	0.156214	0.854203	0.615545	1.1266	0.413579	0.94619	1.03228	0.553425	0.169388	0.254273	0.355709	-0.02931	1.05519	0.217932	-0.31097	-0.26413	-0.07007	0.475337	-0.26333	0.176986	0.14848	0.706106	0.247066	0.366551	0.103596	-0.61877	-0.23811	-0.62537	-0.31866	-0.49712	0.654817	0.044814	0.159621
1.84171	2.00039	1.72012	1.04795	2.14143	1.75215	2.16233	1.85762	1.58781	0.890996	1.32862	0.980522	0.983719	1.06927	1.15368	1.16726	0.394431	0.226717	0.781366	0.56544	1.15508	0.397296	0.951406	0.984473	0.554591	0.177905	0.322824	0.396335	0.034645	1.00273	0.221314	-0.35323	-0.22239	-0.02902	0.407317	-0.24996	0.193447	0.155924	0.720502	0.281897	0.403362	0.191201	-0.56216	-0.25118	-0.67608	-0.29536	-0.52241	0.615561	0.02506	0.112998
1.84154	2.01797	1.7424	1.085	2.12668	1.78787	2.11293	1.85215	1.61171	0.957311	1.33579	0.981748	1.00446	1.08658	1.18084	1.1589	0.333881	0.258165	0.695035	0.636304	1.1872	0.39681	1.01605	0.961595	0.568252	0.148707	0.325477	0.403719	0.069985	0.988809	0.150069	-0.38659	-0.23716	0.024962	0.384841	-0.29729	0.287415	0.145132	0.692973	0.2855	0.436214	0.261844	-0.51991	-0.27779	-0.66204	-0.28479	-0.55793	0.556733	-0.01466	0.055121
1.87459	2.01814	1.76231	1.08632	2.0946	1.78248	2.02024	1.85098	1.59813	1.00138	1.31598	0.913808	1.00017	1.07469	1.19819	1.12618	0.329825	0.293121	0.635063	0.710587	1.18985	0.398344	1.04889	0.967973	0.531831	0.223722	0.352074	0.332697	0.010905	0.999522	0.093513	-0.41169	-0.2154	0.063501	0.300452	-0.34262	0.286771	0.134006	0.711407	0.329413	0.475534	0.245164	-0.47558	-0.24584	-0.64774	-0.2752	-0.53341	0.515808	0.007599	0.023388
1.88836	2.02714	1.75431	1.06933	2.05749	1.73574	1.94956	1.81906	1.57778	1.03648	1.2615	0.859495	0.967855	1.02869	1.18404	1.10283	0.280819	0.258114	0.588757	0.74684	1.18645	0.393254	1.10546	1.02107	0.475784	0.159995	0.360579	0.246619	-0.05527	0.980129	0.051021	-0.4246	-0.20747	0.12814	0.321504	-0.45609	0.22474	0.110958	0.662355	0.347114	0.467193	0.268804	-0.44394	-0.18675	-0.58469	-0.26286	-0.5085	0.490166	0.008209	0.020633
1.88335	2.04608	1.76194	1.04693	2.08696	1.70874	1.93127	1.83339	1.61433	1.07649	1.23045	0.791134	0.963802	1.00463	1.20816	1.12154	0.222002	0.247767	0.544368	0.708907	1.18081	0.360093	1.11219	1.02876	0.431159	0.169285	0.341174	0.258485	-0.07647	0.976113	0.049048	-0.45272	-0.22736	0.082451	0.344934	-0.47941	0.087843	0.15024	0.688525	0.38236	0.46079	0.22182	-0.43194	-0.19859	-0.5234	-0.25984	-0.47307	0.489271	0.037103	0.121204
1.90482	2.07666	1.78042	1.07349	2.17276	1.67607	1.97869	1.84334	1.68747	1.16315	1.22282	0.85763	1.00117	1.03991	1.26752	1.15219	0.198712	0.238472	0.530359	0.621078	1.18504	0.352261	1.03949	1.10981	0.440264	0.183925	0.271963	0.348989	-0.0354	0.947485	0.035725	-0.45378	-0.19182	0.248825	0.371144	-0.57664	0.127065	0.24684	0.711982	0.39818	0.484915	0.216384	-0.44332	-0.27969	-0.46561	-0.1986	-0.44294	0.490944	0.071789	0.206831
1.95559	2.1024	1.8004	1.07468	2.2519	1.67326	1.97919	1.88105	1.72854	1.19683	1.20806	0.833322	1.03924	1.07115	1.29144	1.14534	0.170626	0.221131	0.507656	0.537198	1.19777	0.333965	0.913911	1.15258	0.426923	0.295585	0.197209	0.380733	0.012272	0.933662	0.023079	-0.45259	-0.17963	0.234746	0.317141	-0.56226	0.121044	0.304524	0.783696	0.404165	0.523634	0.163861	-0.48	-0.35976	-0.49521	-0.17471	-0.44706	0.506025	0.064557	0.272024
1.98679	2.12033	1.84103	1.08415	2.27945	1.63002	1.91065	1.85262	1.73376	1.24387	1.22081	0.8328	1.07684	1.11241	1.32595	1.11496	0.200183	0.214877	0.49267	0.612581	1.20878	0.314128	0.739303	1.20497	0.385436	0.35107	0.158222	0.404067	-0.01116	0.940725	0.01815	-0.43354	-0.10595	0.204801	0.20169	-0.52649	0.134885	0.319948	0.896894	0.381627	0.550734	0.150731	-0.46375	-0.43247	-0.59679	-0.17133	-0.51496	0.504805	0.022997	0.282885
2.00156	2.12373	1.83717	1.07645	2.27506	1.64958	1.82002	1.89678	1.70706	1.24004	1.18773	0.741641	1.09938	1.10876	1.33976	1.07817	0.186267	0.168477	0.455628	0.704528	1.22575	0.295103	0.713111	1.19152	0.365678	0.40851	0.166021	0.351641	-0.05531	0.953855	-0.02653	-0.41148	-0.11966	0.098421	0.122707	-0.47637	0.035922	0.265594	0.894745	0.369739	0.558927	0.109321	-0.41934	-0.35075	-0.63057	-0.17375	-0.57108	0.556739	-0.00804	0.188552
2.01135	2.12473	1.84672	1.12761	2.29071	1.68321	1.77067	1.89582	1.67354	1.26998	1.16135	0.761128	1.14101	1.1174	1.35497	1.04201	0.16999	0.188799	0.47789	0.847691	1.20399	0.26936	0.651212	1.19724	0.356079	0.384715	0.151989	0.346913	-0.07295	0.965111	-0.0301	-0.39469	-0.17046	0.039836	0.103088	-0.43816	0.032108	0.25569	0.95174	0.377583	0.500791	0.093994	-0.38332	-0.3407	-0.63476	-0.14131	-0.58572	0.551269	-0.02175	0.124118
2.05387	2.10356	1.84242	1.20023	2.33118	1.78931	1.83808	1.93172	1.67009	1.27391	1.11489	0.764135	1.16369	1.11246	1.32858	1.00749	0.12252	0.200267	0.516998	0.74731	1.19429	0.284395	0.678063	1.2257	0.35351	0.440749	0.129731	0.324769	-0.01878	0.911819	-0.05191	-0.39135	-0.16052	0.124229	0.108825	-0.4627	0.069448	0.21025	0.920602	0.423607	0.481235	0.110542	-0.36546	-0.23665	-0.58295	-0.06264	-0.53091	0.538717	-0.02052	0.060745
2.10365	2.08911	1.86792	1.29035	2.36461	1.85826	1.89349	1.9084	1.65737	1.30442	1.11712	0.868921	1.18041	1.12172	1.31902	0.98037	0.066997	0.270472	0.543237	0.73356	1.16292	0.273401	0.70507	1.26034	0.282338	0.463608	0.095056	0.330292	0.004181	0.891491	-0.02382	-0.41984	-0.21651	0.082306	0.153907	-0.43968	0.19655	0.216234	1.01848	0.453938	0.404238	0.167743	-0.39773	-0.20274	-0.60738	-0.02041	-0.53384	0.467209	-0.02491	0.113229
2.12643	2.06228	1.88172	1.36137	2.32401	1.94488	1.97617	1.92569	1.62075	1.34178	1.12372	0.979568	1.17441	1.11649	1.31457	0.972679	0.02379	0.312935	0.573971	0.64642	1.18338	0.284506	0.715324	1.25652	0.28002	0.511847	0.10161	0.294418	-0.01111	0.892167	-0.0874	-0.45102	-0.16408	0.107781	0.202741	-0.43887	0.24149	0.235677	1.0392	0.425466	0.365185	0.180042	-0.40142	-0.14813	-0.59763	0.013328	-0.57486	0.421505	-0.02021	0.147032
2.1068	2.03322	1.89566	1.41311	2.26174	1.96872	1.94748	1.95351	1.55255	1.38175	1.14347	1.05523	1.17694	1.10203	1.31543	0.957744	0.026201	0.447622	0.568235	0.736709	1.19006	0.261916	0.636379	1.25423	0.353704	0.528756	0.115277	0.254772	0.002511	0.880036	-0.13326	-0.48079	-0.16439	0.082126	0.193729	-0.40643	0.242155	0.231067	1.04076	0.368073	0.271101	0.150927	-0.38207	-0.13692	-0.61114	0.001788	-0.55949	0.383192	-0.0055	0.163074
2.07787	2.00878	1.89148	1.44619	2.2148	1.9883	1.88907	1.96534	1.47579	1.41519	1.11958	1.11206	1.1851	1.06549	1.28256	0.940153	0.023852	0.575399	0.566823	0.816268	1.19346	0.245356	0.480461	1.26386	0.404259	0.506695	0.097652	0.200105	0.010831	0.839999	-0.20233	-0.49594	-0.10407	0.080846	0.199574	-0.38901	0.148343	0.220357	0.920072	0.30319	0.221448	0.041624	-0.36006	-0.15793	-0.59743	-0.02645	-0.55447	0.335633	-0.03122	0.158595
2.10621	1.98537	1.90137	1.41733	2.24524	1.95701	1.81548	1.98557	1.44546	1.44256	1.11084	1.08043	1.20986	1.04768	1.25317	0.909519	0.040832	0.675519	0.509318	0.865267	1.19419	0.227573	0.278247	1.31961	0.472435	0.529353	0.074391	0.227878	0.047124	0.812519	-0.19706	-0.49937	-0.15047	0.15077	0.119845	-0.43204	0.033967	0.208164	0.878785	0.269217	0.098822	-0.03678	-0.4129	-0.07405	-0.55645	-0.0749	-0.53525	0.333126	-0.04354	0.133831
2.14852	1.97292	1.90503	1.39519	2.25245	1.95654	1.74839	1.97063	1.40954	1.47672	1.07339	1.04211	1.22106	1.04307	1.23788	0.90918	0.035745	0.713444	0.468237	0.918545	1.1914	0.226199	0.212878	1.33306	0.448954	0.503202	0.052547	0.210535	0.012054	0.820412	-0.20301	-0.49596	-0.22618	0.162657	0.072565	-0.49049	-0.02167	0.138071	0.89731	0.236092	0.054672	-0.0598	-0.44828	-0.07616	-0.52469	-0.0519	-0.60571	0.350507	-0.05939	0.136092
2.22759	1.95284	1.93538	1.42219	2.23896	2.00552	1.71419	1.98757	1.38778	1.51943	1.08736	1.06088	1.24771	1.02519	1.24712	0.8954	0.025894	0.71281	0.428094	0.977838	1.21892	0.221557	0.154871	1.33237	0.477842	0.51076	0.029305	0.223513	0.057004	0.842703	-0.22024	-0.48207	-0.31391	0.174391	0.088046	-0.50604	-0.02233	0.112449	0.985292	0.260145	0.049564	-0.05265	-0.43087	-0.01644	-0.5075	-0.00891	-0.65125	0.350098	-0.06462	0.10686
2.27879	1.9546	1.96106	1.46455	2.22068	2.05818	1.59397	1.97117	1.36501	1.54583	1.09963	1.06435	1.26651	1.02757	1.25452	0.871211	0.018163	0.735615	0.421046	1.11752	1.24486	0.214088	0.212297	1.27194	0.423981	0.563292	0.021332	0.225533	0.014481	0.823011	-0.23336	-0.51935	-0.33214	0.118553	-0.01431	-0.4923	0.050403	0.119288	0.974202	0.286502	0.143759	-0.14948	-0.346	-0.01237	-0.55691	0.0559	-0.54915	0.313429	-0.05749	0.109078
2.31933	1.96043	1.97828	1.49461	2.23102	2.10666	1.54709	2.00653	1.36096	1.58087	1.12614	1.12215	1.31698	1.04945	1.24887	0.855279	0.016898	0.782515	0.438069	1.1662	1.29409	0.190578	0.229198	1.21619	0.383849	0.583399	-0.03276	0.264656	-0.00739	0.779081	-0.24781	-0.55542	-0.28831	0.082232	-0.06304	-0.48267	0.068295	0.142139	0.972742	0.360821	0.179988	-0.20947	-0.30118	0.053031	-0.58055	0.103417	-0.37167	0.234595	-0.05249	0.071349
2.36586	1.97871	1.96915	1.48799	2.25349	2.11394	1.44362	2.07134	1.37086	1.59866	1.15323	1.08162	1.3398	1.04902	1.21603	0.846372	0.028354	0.898966	0.513275	1.25096	1.3015	0.176178	0.223492	1.11369	0.340645	0.540482	-0.08444	0.258378	-0.04262	0.721258	-0.25308	-0.61226	-0.17585	0.103751	-0.09012	-0.54976	0.093651	0.169979	0.868673	0.381948	0.165093	-0.24832	-0.27337	0.004468	-0.58967	0.146707	-0.18786	0.128097	-0.04243	0.04219
2.39349	1.98414	1.95856	1.49786	2.28915	2.13281	1.43377	2.14537	1.38248	1.62043	1.21015	1.14626	1.38287	1.04147	1.20424	0.821387	0.034099	0.923915	0.61914	1.2933	1.31495	0.157466	0.257331	0.980965	0.324183	0.522363	-0.13729	0.23015	-0.0475	0.652835	-0.2399	-0.59144	-0.01669	0.096984	-0.08802	-0.55017	0.060597	0.111594	0.820762	0.378733	0.140388	-0.13103	-0.23161	0.017808	-0.58778	0.220715	-0.11211	0.02071	-0.07249	-0.02842
2.42509	1.97917	1.96064	1.50765	2.29532	2.15676	1.4763	2.20708	1.39524	1.62116	1.23029	1.14245	1.39986	1.00171	1.1974	0.754836	0.018443	0.894475	0.666816	1.28753	1.31089	0.138374	0.261815	0.831328	0.29634	0.509465	-0.13096	0.179835	-0.05672	0.602363	-0.22149	-0.5807	0.084044	0.034989	-0.11138	-0.4977	0.030302	0.058451	0.763988	0.319245	0.155859	-0.0768	-0.15944	0.001789	-0.59162	0.198059	-0.09557	-0.05348	-0.07634	-0.02862
2.43802	1.98152	1.98682	1.53145	2.29106	2.20167	1.51494	2.19179	1.40431	1.64717	1.22929	1.17788	1.42246	1.03085	1.21664	0.743105	0.056648	0.834919	0.726582	1.31481	1.31691	0.121629	0.281535	0.778842	0.334481	0.518396	-0.12165	0.212718	-0.06996	0.523316	-0.19686	-0.49355	0.142965	0.106767	-0.21582	-0.41084	-0.03568	0.032985	0.770519	0.287706	0.20086	-0.06579	-0.09419	0.091	-0.58758	0.210234	-0.02916	-0.07732	-0.07557	-0.11097
2.41967	1.99297	2.02614	1.55536	2.2677	2.26241	1.48605	2.12487	1.43892	1.6558	1.18294	1.15894	1.41045	1.05915	1.20713	0.774807	0.086408	0.791618	0.750346	1.38804	1.32461	0.094791	0.221618	0.77916	0.401893	0.542962	-0.13342	0.228196	-0.06059	0.49006	-0.19889	-0.46814	0.174637	0.084084	-0.24908	-0.36028	-0.09344	0.035335	0.828897	0.238513	0.201278	-0.03602	-0.04156	0.170226	-0.5542	0.164704	-0.07132	-0.09248	-0.0569	-0.08012
2.44304	1.99746	2.04134	1.6247	2.25203	2.32234	1.40625	2.03788	1.43052	1.68175	1.1568	1.15482	1.41727	1.09763	1.19143	0.78392	0.163473	0.758651	0.830114	1.56118	1.3078	0.094192	0.172277	0.829002	0.50679	0.559178	-0.13332	0.248766	0.010127	0.472058	-0.1982	-0.38985	0.18946	0.268979	-0.22222	-0.44271	-0.07612	0.136886	0.791553	0.243116	0.180645	-0.03153	0.005321	0.235021	-0.49814	0.160764	-0.12296	-0.08758	-0.05181	-0.15771
2.43873	2.00539	2.04739	1.66541	2.26613	2.37118	1.36098	2.01193	1.44433	1.67735	1.15154	1.16647	1.4297	1.10062	1.17333	0.740186	0.171625	0.686002	0.824906	1.58677	1.31695	0.090505	0.246181	0.868125	0.472821	0.654963	-0.12353	0.22683	0.037802	0.500987	-0.18149	-0.36333	0.204295	0.211203	-0.26286	-0.48303	0.00812	0.218981	0.791557	0.198053	0.128437	-0.02978	-0.02537	0.237308	-0.48404	0.11578	-0.21479	-0.09732	-0.06721	-0.06243
2.39275	2.01793	2.04443	1.69253	2.27838	2.37997	1.39281	2.04213	1.45242	1.69291	1.15364	1.16573	1.45187	1.09196	1.17322	0.673822	0.188187	0.66249	0.821335	1.49597	1.29362	0.112068	0.340393	0.911433	0.432513	0.666534	-0.0907	0.236122	0.096788	0.536865	-0.12669	-0.31148	0.154974	0.302207	-0.2022	-0.49888	0.090069	0.230028	0.724724	0.247073	0.083439	-0.11959	-0.0792	0.138262	-0.43386	0.096126	-0.18022	-0.07702	-0.04074	-0.0706
2.30342	2.02149	2.05448	1.66999	2.28426	2.37136	1.46036	2.07512	1.47574	1.69273	1.17168	1.16326	1.44681	1.09523	1.17501	0.637909	0.153751	0.71999	0.786762	1.21802	1.29731	0.101222	0.504516	0.904334	0.335558	0.657893	-0.06675	0.227742	0.089368	0.550716	-0.078	-0.29971	0.141032	0.153965	-0.13127	-0.38001	0.100817	0.190594	0.739161	0.22468	-0.01269	-0.21809	-0.22377	0.136008	-0.43496	0.075913	-0.12789	-0.09867	-0.06968	-0.03772
2.23948	2.01833	2.06494	1.68311	2.27042	2.36891	1.50338	2.09323	1.46846	1.70651	1.15948	1.09453	1.44712	1.07639	1.16772	0.618884	0.15139	0.715475	0.80588	1.07519	1.2857	0.075835	0.581529	0.85677	0.333473	0.663533	-0.04572	0.170735	0.046153	0.527645	-0.04117	-0.27613	0.133013	0.190024	-0.00586	-0.31054	0.052702	0.054047	0.726423	0.220445	-0.0756	-0.26203	-0.24592	0.064781	-0.45282	0.078153	-0.0804	-0.10227	-0.07554	-0.14757
2.22215	2.02953	2.07775	1.69402	2.28905	2.34794	1.53934	2.08318	1.46466	1.74869	1.1653	1.00987	1.45999	1.08252	1.1644	0.606759	0.125669	0.767958	0.808196	0.987992	1.2996	0.037181	0.583539	0.801196	0.34292	0.670644	-0.01942	0.158051	-0.01622	0.489516	-0.0681	-0.26663	0.183473	0.1933	0.030272	-0.27832	0.012393	0.036938	0.74481	0.173788	-0.0676	-0.3256	-0.26624	0.105071	-0.45305	0.028577	-0.05253	-0.1571	-0.11493	-0.13318
2.22095	2.02968	2.11553	1.71954	2.28141	2.3334	1.45668	2.08296	1.46405	1.78446	1.1785	0.951969	1.46989	1.08468	1.14913	0.653773	0.127178	0.70872	0.824787	1.13403	1.34194	0.039906	0.593076	0.807221	0.389977	0.733961	-0.02023	0.144727	-0.03292	0.484038	-0.08123	-0.25581	0.170931	0.245035	0.072609	-0.26848	0.060369	0.029052	0.720783	0.156544	-0.00737	-0.29157	-0.25281	0.046798	-0.4543	0.008206	-0.07878	-0.18906	-0.08772	-0.11108
2.208	2.02006	2.16002	1.71348	2.27997	2.28863	1.44362	2.08123	1.50371	1.82017	1.17639	0.934756	1.47806	1.10834	1.17361	0.663847	0.142851	0.746228	0.842079	1.09568	1.36249	0.05902	0.564028	0.778069	0.448722	0.720474	-0.00578	0.179955	-0.00682	0.486921	-0.10997	-0.25977	0.15336	0.198319	0.111056	-0.241	0.068458	0.030381	0.679144	0.150708	0.018632	-0.27145	-0.27377	0.035103	-0.43352	-0.03699	-0.10587	-0.24306	-0.08801	0.010351
2.19313	2.01089	2.20753	1.69461	2.26437	2.26805	1.38703	2.09553	1.54677	1.83748	1.14892	0.869268	1.48311	1.10564	1.18778	0.678032	0.202408	0.705321	0.840261	1.06431	1.36554	0.107294	0.62785	0.748213	0.499305	0.732886	-0.02273	0.190134	-0.00312	0.429254	-0.13511	-0.25831	0.149731	0.186723	0.142296	-0.21905	0.098554	-0.08009	0.655	0.16487	0.036207	-0.1879	-0.26003	-0.01478	-0.42047	-0.00866	-0.15294	-0.24941	-0.05923	0.064954
2.1763	2.01625	2.22154	1.65247	2.28593	2.24559	1.36645	2.09599	1.5832	1.85814	1.1119	0.820663	1.4925	1.13113	1.22854	0.623664	0.259831	0.760641	0.837565	0.964626	1.34028	0.12219	0.702679	0.728065	0.591749	0.696519	-0.01278	0.223032	-0.0673	0.324057	-0.19674	-0.24799	0.201352	0.178321	0.122271	-0.18895	0.075533	-0.08972	0.607245	0.171427	0.014104	-0.14859	-0.21163	0.062796	-0.42961	-0.00717	-0.14598	-0.28067	-0.06182	0.093671
2.13805	2.024	2.2237	1.63675	2.3122	2.20495	1.32835	2.12374	1.56158	1.84823	1.08794	0.806348	1.50198	1.17213	1.20585	0.61578	0.251055	0.838249	0.787024	0.956617	1.32046	0.121768	0.771958	0.766918	0.606811	0.695347	-0.03412	0.230429	-0.12816	0.288182	-0.23106	-0.29734	0.365293	0.184398	0.05669	-0.17737	0.056224	-0.03354	0.663577	0.152575	-0.0846	-0.12664	-0.14941	0.12272	-0.38331	0.000503	-0.17255	-0.26594	-0.0206	0.042989
2.13074	2.01078	2.21408	1.61182	2.3288	2.1865	1.27236	2.11962	1.51584	1.84892	1.08474	0.79418	1.50645	1.22657	1.16887	0.589526	0.23696	0.956992	0.71156	0.958521	1.3161	0.108752	0.758688	0.80393	0.633419	0.655736	0.002798	0.203093	-0.17317	0.34313	-0.24775	-0.32639	0.443009	0.194773	0.10773	-0.16514	-0.02201	0.018852	0.659818	0.111343	-0.11717	-0.08521	-0.13095	0.154181	-0.41945	-0.06599	-0.25195	-0.25244	-0.00103	0.018786
2.11354	2.01605	2.22263	1.63724	2.31607	2.17664	1.21217	2.07373	1.49734	1.86143	1.08597	0.822299	1.50746	1.2489	1.1567	0.596544	0.236209	1.10196	0.667507	1.04958	1.30763	0.127006	0.667082	0.808158	0.621562	0.589083	0.008574	0.17954	-0.18626	0.400003	-0.25237	-0.34639	0.475941	0.268317	0.157963	-0.18872	-0.02539	0.061705	0.68092	0.069387	-0.11132	-0.08369	-0.16323	0.037638	-0.41044	-0.07777	-0.30043	-0.23229	0.01507	-0.00238
2.15539	2.01357	2.22944	1.65357	2.29666	2.16977	1.1885	1.97731	1.51384	1.90485	1.08084	0.79702	1.49159	1.24027	1.16287	0.605792	0.262956	1.18889	0.612128	1.008	1.2937	0.133417	0.566212	0.858252	0.682369	0.562099	-0.00254	0.169442	-0.18194	0.431285	-0.27021	-0.3488	0.419554	0.340901	0.239244	-0.19628	-0.06043	0.077256	0.606105	0.073088	-0.05541	-0.13224	-0.25041	-0.03834	-0.40935	-0.12009	-0.34471	-0.2363	0.014138	0.011445
2.15201	2.02155	2.24911	1.69054	2.26419	2.1315	1.18507	1.93338	1.55738	1.9514	1.05093	0.809395	1.49237	1.22059	1.21255	0.628067	0.290701	1.28341	0.592558	1.018	1.26733	0.145411	0.542785	0.912843	0.681932	0.507976	-0.07567	0.180288	-0.15485	0.449567	-0.28978	-0.38516	0.400809	0.376247	0.244782	-0.20101	-0.09196	0.145485	0.58042	0.084116	-0.03459	-0.20006	-0.31459	-0.11731	-0.33484	-0.16022	-0.32703	-0.25237	0.056012	0.035712
2.172	2.02135	2.25364	1.69395	2.25612	2.09872	1.20427	1.93099	1.57915	1.96906	1.02379	0.784677	1.51915	1.2129	1.23223	0.571071	0.308839	1.29598	0.536988	0.906768	1.2483	0.114695	0.464101	0.867368	0.650055	0.507485	-0.08077	0.192236	-0.14366	0.484948	-0.29969	-0.45264	0.42561	0.351693	0.202493	-0.19763	-0.14593	0.146614	0.53065	0.093883	0.031465	-0.22037	-0.27516	-0.14044	-0.25966	-0.29531	-0.36771	-0.25369	0.057872	0.106946
2.10196	2.04391	2.26638	1.6606	2.27016	2.07491	1.1568	1.93187	1.5657	1.97903	1.00278	0.719892	1.55751	1.2173	1.2503	0.485919	0.347922	1.32539	0.473305	0.884935	1.20476	0.120216	0.436424	0.801544	0.657767	0.480019	-0.01553	0.177069	-0.1322	0.481709	-0.24131	-0.47904	0.440902	0.417822	0.202843	-0.26119	-0.12475	0.156422	0.516036	0.116169	0.16813	-0.20965	-0.15338	-0.1239	-0.21708	-0.35881	-0.3598	-0.23923	0.064522	0.183997
2.10768	2.03411	2.27003	1.67487	2.30373	2.05876	1.16962	1.95593	1.54586	1.9742	1.03002	0.733494	1.57171	1.21585	1.23261	0.411346	0.343487	1.31514	0.437271	0.847702	1.17215	0.11857	0.404401	0.697414	0.684068	0.505442	0.058146	0.162738	-0.06315	0.47705	-0.1791	-0.49646	0.467631	0.359121	0.137304	-0.28749	-0.02487	0.256422	0.482235	0.117946	0.283247	-0.27625	-0.07507	-0.21745	-0.21609	-0.3893	-0.37188	-0.24535	0.027146	0.226625
2.07706	2.04137	2.25898	1.73433	2.32175	2.01525	1.18221	2.00195	1.48702	1.97685	1.05535	0.703562	1.57881	1.18471	1.18692	0.393082	0.374661	1.35513	0.409005	0.808824	1.11547	0.15095	0.413833	0.74174	0.801053	0.582306	0.057738	0.117245	0.013604	0.470977	-0.11837	-0.49452	0.473763	0.388921	0.188492	-0.31987	0.024711	0.227735	0.477161	0.123511	0.306458	-0.34346	-0.03559	-0.22728	-0.25807	-0.36268	-0.37228	-0.24391	0.019562	0.207561
2.11742	2.03937	2.26194	1.8112	2.29171	1.99601	1.22593	2.06216	1.47968	1.99137	1.0898	0.751841	1.58658	1.17553	1.16947	0.411694	0.416417	1.29371	0.470791	0.812463	1.1242	0.166663	0.372201	0.747321	0.830564	0.599065	0.032206	0.158626	0.083122	0.43933	-0.15388	-0.47904	0.433741	0.354948	0.064012	-0.32849	0.072765	0.232753	0.474875	0.070631	0.2588	-0.37936	-0.02273	-0.32143	-0.19385	-0.37507	-0.37064	-0.24744	0.000567	0.20336
2.09381	2.0484	2.26623	1.84117	2.23609	2.01381	1.18442	2.06913	1.43491	1.9945	1.09061	0.758694	1.58781	1.18809	1.15657	0.432963	0.465605	1.20796	0.561302	0.832856	1.10277	0.167158	0.328196	0.758675	0.906154	0.625036	0.014988	0.140132	0.096419	0.381454	-0.15349	-0.51569	0.370136	0.366274	0.037316	-0.41181	0.070846	0.143662	0.514883	0.014389	0.19134	-0.34385	-0.01368	-0.24534	-0.19379	-0.43327	-0.42172	-0.26377	-0.02506	0.202498
2.1616	2.0512	2.28427	1.83612	2.20283	2.07326	1.12722	2.05337	1.44989	2.01239	1.09341	0.733998	1.57668	1.22734	1.16529	0.481746	0.526966	1.09462	0.69098	0.894463	1.13647	0.157014	0.326054	0.717954	0.889052	0.526078	-0.00274	0.164316	0.124123	0.351813	-0.19964	-0.52603	0.328543	0.438743	-0.02843	-0.47233	0.054254	0.108986	0.499432	-0.00628	0.207	-0.32799	-0.05181	-0.25518	-0.08508	-0.3971	-0.42788	-0.28539	-0.01721	0.134181
2.1578	2.05671	2.28521	1.84017	2.18835	2.12532	1.08914	2.07447	1.47124	2.02594	1.09727	0.696259	1.58441	1.26607	1.15569	0.505915	0.5388	1.06378	0.769674	0.930602	1.14963	0.144783	0.336679	0.675976	0.914214	0.515595	0.00149	0.169926	0.153651	0.346736	-0.19475	-0.56532	0.317223	0.476599	-0.08317	-0.51284	0.010665	-0.01108	0.515684	-0.00247	0.229019	-0.34867	-0.12613	-0.14904	-0.13056	-0.38032	-0.42692	-0.31994	-0.04265	0.074918
2.20396	2.0727	2.28855	1.88062	2.18416	2.18272	1.07885	2.09074	1.53664	2.04245	1.07778	0.695578	1.60869	1.27164	1.15845	0.503258	0.573766	1.08167	0.834957	0.968772	1.18092	0.139952	0.369239	0.656747	0.938952	0.511975	-0.00329	0.199618	0.164097	0.346353	-0.2552	-0.55658	0.284409	0.55808	-0.09473	-0.5114	-0.03123	-0.03557	0.465937	0.051823	0.278176	-0.35523	-0.11342	-0.11443	-0.07199	-0.30764	-0.37449	-0.3034	-0.07159	0.048595
2.14577	2.07607	2.29218	1.9302	2.14576	2.22658	1.10827	2.07796	1.59288	2.05215	1.06666	0.720565	1.61655	1.26685	1.15835	0.459148	0.559424	1.03711	0.872451	0.956629	1.1646	0.1368	0.298379	0.638406	0.992347	0.550073	0.013312	0.194895	0.178964	0.328012	-0.26876	-0.57668	0.268489	0.565977	-0.13799	-0.52066	-0.09032	0.012507	0.467399	0.062248	0.312835	-0.31589	-0.06763	-0.07876	-0.1281	-0.32103	-0.36697	-0.29545	-0.09297	0.098901
2.14843	2.06468	2.28651	1.95902	2.16977	2.26866	1.04375	2.08348	1.63939	2.05195	1.06416	0.758984	1.60823	1.26729	1.16391	0.397576	0.556145	1.0065	0.932169	1.01855	1.12725	0.142507	0.27989	0.603838	0.993359	0.615665	0.020253	0.160438	0.15187	0.326108	-0.28878	-0.56335	0.256596	0.519678	-0.1385	-0.51389	-0.07003	0.092713	0.418236	0.05866	0.422511	-0.24639	0.062648	-0.11983	-0.13158	-0.32514	-0.35807	-0.29979	-0.05392	0.124118
2.15583	2.07286	2.29165	1.95978	2.19296	2.27905	0.99128	2.13164	1.67567	2.07048	1.08274	0.699915	1.60203	1.29101	1.19939	0.42764	0.563195	0.92689	0.958848	1.0614	1.07394	0.155664	0.208983	0.593103	0.961468	0.604812	-0.03895	0.158927	0.139147	0.289673	-0.30764	-0.53736	0.306532	0.569807	-0.19785	-0.53508	-0.09885	0.077804	0.437515	0.045074	0.467032	-0.24545	0.109078	-0.1455	-0.10818	-0.33165	-0.24954	-0.31597	0.03139	0.094734
2.18805	2.09933	2.28726	1.96531	2.25431	2.27816	0.905066	2.22115	1.73373	2.08411	1.09016	0.694697	1.62136	1.32408	1.23889	0.433831	0.587955	0.879914	0.963351	1.16653	1.01878	0.145749	0.262975	0.536555	0.894279	0.683205	-0.11301	0.163879	0.091424	0.260233	-0.31917	-0.50169	0.287618	0.47621	-0.25162	-0.50636	-0.1186	0.022691	0.462051	0.069421	0.541203	-0.28638	0.10543	-0.18534	-0.06969	-0.36055	-0.11232	-0.32747	0.063764	0.211857
2.18188	2.13369	2.30033	2.0028	2.2393	2.28755	0.950709	2.25859	1.78795	2.08394	1.05275	0.679597	1.61909	1.34213	1.26003	0.473462	0.627114	0.845448	0.95558	1.13481	0.957433	0.12751	0.254696	0.518947	0.816412	0.677659	-0.16277	0.190601	0.071047	0.224726	-0.29351	-0.50315	0.315818	0.398592	-0.25217	-0.43912	-0.19683	-0.02362	0.451171	0.104821	0.543761	-0.22026	0.110958	-0.18014	0.056337	-0.39037	-0.0603	-0.34827	0.05205	0.316933
2.1938	2.13065	2.29648	2.02283	2.20792	2.27463	0.978691	2.20312	1.8294	2.07106	1.01905	0.682102	1.59473	1.35457	1.24672	0.457317	0.664454	0.794063	0.933324	1.06874	0.898174	0.096553	0.281602	0.46529	0.776552	0.699929	-0.13322	0.166467	0.080939	0.205075	-0.22765	-0.50149	0.306015	0.263471	-0.2565	-0.40385	-0.28759	-0.06734	0.377506	0.122569	0.60037	-0.10256	0.158407	-0.15652	0.146639	-0.38553	-0.1611	-0.35951	0.027253	0.402039
2.24541	2.12164	2.31481	2.00594	2.18012	2.26549	0.967549	2.21371	1.84163	2.07966	0.981605	0.722228	1.58941	1.40481	1.24178	0.501008	0.706528	0.74103	0.902398	0.975984	0.873448	0.09697	0.240583	0.456	0.754729	0.741751	-0.12583	0.169778	0.135177	0.178803	-0.22175	-0.47034	0.336884	0.319293	-0.22926	-0.40368	-0.30721	-0.01009	0.358594	0.122265	0.530931	-0.00346	0.205934	-0.15943	0.234235	-0.31669	-0.23559	-0.38414	0.034177	0.326821
2.23747	2.09959	2.31871	1.9631	2.18772	2.24647	0.97932	2.1548	1.84764	2.09343	0.97807	0.741021	1.60189	1.44884	1.24734	0.539	0.80939	0.729458	0.842424	0.927666	0.860337	0.099772	0.349007	0.428222	0.828846	0.782095	-0.16349	0.146933	0.21361	0.12925	-0.26254	-0.43507	0.399641	0.460723	-0.13174	-0.45427	-0.27767	-0.04505	0.346619	0.132202	0.449763	-0.00238	0.196553	-0.10951	0.277833	-0.24058	-0.2983	-0.39454	0.108751	0.250111
2.17304	2.1063	2.33049	1.96733	2.2077	2.24212	1.00603	2.22049	1.8557	2.11469	0.98811	0.8228	1.63988	1.49546	1.23821	0.574704	0.908782	0.709848	0.774512	0.862228	0.854751	0.126866	0.451949	0.43112	0.86711	0.793387	-0.20506	0.180038	0.250684	0.120117	-0.31668	-0.38534	0.492508	0.518295	-0.03546	-0.44552	-0.16936	-0.04302	0.362917	0.129214	0.356969	-0.07458	0.183005	-0.16843	0.256946	-0.2193	-0.31347	-0.45686	0.133831	0.205065
2.07448	2.10935	2.3226	2.00385	2.21541	2.21557	1.1117	2.18337	1.82602	2.10965	0.988831	0.921847	1.65281	1.48128	1.2086	0.534072	1.06818	0.784641	0.747771	0.815639	0.820711	0.174906	0.567028	0.381956	0.887904	0.7443	-0.20258	0.192358	0.242204	0.095672	-0.33007	-0.34326	0.571649	0.49655	0.099226	-0.4678	-0.09271	-0.14911	0.311507	0.112478	0.416319	-0.1366	0.208479	-0.13339	0.248168	-0.26051	-0.32707	-0.4752	0.148205	0.185528
2.08063	2.10387	2.34155	2.04863	2.21418	2.15575	1.15385	2.28574	1.75867	2.12649	0.978865	1.01484	1.67553	1.46546	1.18023	0.478209	1.19384	0.768077	0.776223	0.76678	0.790333	0.272826	0.502834	0.33268	0.872971	0.746456	-0.20079	0.236494	0.254422	0.069577	-0.34501	-0.28469	0.618116	0.49642	0.14259	-0.50835	-0.03717	-0.1419	0.29627	0.086641	0.502851	-0.16133	0.318458	-0.22221	0.210827	-0.26866	-0.33192	-0.52548	0.132469	0.199734
2.07474	2.08852	2.34227	2.03804	2.23019	2.11942	1.24526	2.30116	1.67614	2.145	0.961454	1.05888	1.6775	1.42629	1.14281	0.420279	1.3388	0.878023	0.804696	0.673484	0.786038	0.381761	0.476148	0.21548	0.853482	0.770862	-0.22602	0.232994	0.259011	0.001911	-0.36097	-0.22311	0.625767	0.567809	0.210473	-0.51465	-0.01647	-0.25022	0.33476	0.024583	0.573809	-0.16132	0.481989	-0.1945	0.192391	-0.22346	-0.33158	-0.5769	0.103135	0.176916
2.10757	2.06862	2.35702	2.02838	2.25093	2.134	1.31244	2.38909	1.62565	2.17109	0.968503	0.99143	1.6991	1.43252	1.1501	0.376678	1.38054	0.956334	0.802587	0.563462	0.771871	0.470627	0.538725	0.24986	0.848906	0.781766	-0.25857	0.288628	0.301915	-0.06875	-0.34403	-0.18466	0.685819	0.591821	0.199715	-0.50021	-0.02376	-0.18077	0.355948	0.031258	0.371361	-0.12236	0.702548	-0.25086	0.167224	-0.09994	-0.36945	-0.63637	0.077361	0.164546
2.14557	2.06564	2.34563	2.01072	2.22961	2.14892	1.36745	2.30067	1.58553	2.16229	0.963138	0.958425	1.68235	1.45492	1.14911	0.327098	1.40858	1.08961	0.768642	0.484067	0.733923	0.536897	0.582335	0.273397	0.848855	0.658484	-0.25553	0.273976	0.301279	-0.08404	-0.33722	-0.17313	0.751387	0.594628	0.179557	-0.46003	-0.0763	-0.15392	0.291068	0.016037	0.19671	-0.22226	0.71727	-0.23904	0.106888	-0.01953	-0.33902	-0.64507	0.01611	0.137699
2.18512	2.0526	2.34238	1.9795	2.21057	2.11228	1.3909	2.26978	1.57548	2.15691	0.943706	0.890429	1.69438	1.5078	1.17512	0.276983	1.39763	1.12239	0.737065	0.480113	0.690586	0.59624	0.602529	0.306743	0.844758	0.595967	-0.2748	0.286401	0.286779	-0.05251	-0.34	-0.18773	0.823804	0.587722	0.0624	-0.47331	-0.13887	-0.08296	0.165064	0.003303	0.08498	-0.29352	0.685771	-0.27053	0.050793	-0.00875	-0.2359	-0.64943	-0.01969	0.147107
2.15523	2.04546	2.33181	1.96979	2.19582	2.04658	1.35338	2.20904	1.54892	2.14846	0.902017	0.838464	1.67405	1.51741	1.15883	0.26136	1.45483	1.12773	0.723686	0.570115	0.649517	0.638772	0.592722	0.316486	0.855289	0.509118	-0.28637	0.249552	0.242649	0.013413	-0.3498	-0.19007	0.907887	0.722589	0.005985	-0.58933	-0.09204	-0.09861	0.142649	-0.07773	0.134959	-0.41289	0.618609	-0.27636	0.050504	-0.04505	-0.18179	-0.64886	-0.05987	0.061484
2.13782	2.04022	2.3293	1.95905	2.17797	2.00829	1.30151	2.29954	1.5263	2.15187	0.888262	0.784596	1.6912	1.4925	1.1936	0.233227	1.47966	1.08848	0.687874	0.580194	0.672541	0.662132	0.671817	0.296871	0.912396	0.562113	-0.29601	0.266185	0.253514	0.036354	-0.34076	-0.17792	0.920732	0.70686	0.052698	-0.62391	-0.02012	-0.09166	0.1154	-0.15413	0.214834	-0.48339	0.680312	-0.24635	0.044391	-0.08259	-0.1648	-0.65635	-0.10011	0.091322
2.08094	2.05315	2.32757	1.9727	2.16173	1.99738	1.24929	2.3216	1.47559	2.14094	0.890446	0.815513	1.68527	1.46101	1.19677	0.174244	1.56472	1.10092	0.68993	0.575767	0.680572	0.679485	0.761358	0.286911	0.996987	0.657181	-0.2324	0.266645	0.299187	0.046056	-0.31201	-0.10906	0.899178	0.718552	0.149656	-0.55893	0.043023	-0.04926	0.116616	-0.21546	0.2274	-0.59864	0.729169	-0.2129	0.033944	-0.08591	-0.27965	-0.66928	-0.15182	0.095313
2.10733	2.03429	2.30792	1.97813	2.14369	1.96782	1.25919	2.3164	1.43136	2.11611	0.911078	0.861145	1.68343	1.43642	1.18853	0.083037	1.61033	1.03069	0.710954	0.500133	0.673964	0.703445	0.684727	0.193241	0.963819	0.756605	-0.16908	0.257825	0.341666	-0.00383	-0.2984	-0.02559	0.84571	0.575618	0.197303	-0.40489	-0.0429	-0.1173	0.040548	-0.27687	0.247525	-0.57521	0.799305	-0.14688	0.001621	-0.08284	-0.29945	-0.6957	-0.17896	0.161193
2.13636	2.01283	2.2785	2.0332	2.13461	1.94611	1.23412	2.3025	1.36401	2.08978	0.931525	0.89378	1.67616	1.41301	1.15202	-0.03747	1.69385	0.978134	0.740417	0.567774	0.654239	0.713108	0.637072	0.170056	0.865739	0.750015	-0.10265	0.226564	0.345877	-0.02354	-0.30256	0.055925	0.896424	0.542679	0.092385	-0.20047	0.008902	-0.14227	-0.01558	-0.30369	0.207779	-0.50621	0.930369	-0.19338	-0.04585	-0.09943	-0.32173	-0.69842	-0.20826	0.114312
2.17655	1.98226	2.25845	2.07736	2.13808	1.90234	1.21183	2.25392	1.32835	2.09294	0.955848	0.902492	1.68124	1.40683	1.15106	-0.0913	1.76824	1.00929	0.76554	0.581054	0.614408	0.716362	0.594343	0.147269	0.827526	0.603303	-0.06401	0.249874	0.326126	-0.05798	-0.30052	0.12867	0.992929	0.536636	0.007869	-0.07635	0.031663	-0.21208	-0.10385	-0.31582	0.177005	-0.33701	1.03046	-0.14946	-0.0068	-0.04936	-0.25706	-0.66822	-0.19887	0.026032
2.16565	1.97783	2.26049	2.13403	2.11144	1.87485	1.18342	2.25386	1.29947	2.09448	0.977577	0.882079	1.68626	1.39452	1.14075	-0.07654	1.86345	1.10173	0.768643	0.597891	0.572922	0.746162	0.562329	0.142098	0.921003	0.543056	-0.02747	0.272535	0.324784	-0.06264	-0.2927	0.20452	1.11559	0.639896	-0.02933	-0.02535	0.098923	-0.22634	-0.14827	-0.32887	0.153549	-0.40202	1.07987	-0.19853	0.00054	-0.03109	-0.19003	-0.66281	-0.21259	0.009492
2.08701	1.96536	2.26017	2.18509	2.08565	1.84983	1.1622	2.22545	1.27531	2.09859	1.01172	0.838553	1.66153	1.41742	1.10515	-0.00886	1.96656	1.20528	0.757867	0.650785	0.565034	0.759074	0.416252	0.082486	0.99968	0.496849	0.019136	0.296341	0.280869	-0.09563	-0.3009	0.34216	1.16181	0.684094	-0.01114	-0.00411	-0.0355	-0.31521	-0.17596	-0.36164	0.151616	-0.423	1.01801	-0.07011	0.093113	-0.01157	-0.07407	-0.69018	-0.13929	-0.0071
2.05716	1.94344	2.25353	2.28336	2.03409	1.84187	1.17639	2.25524	1.23476	2.07963	1.03088	0.79448	1.63989	1.41473	1.04105	0.043159	1.96704	1.23762	0.708273	0.724442	0.578837	0.75735	0.34163	0.09939	1.03289	0.535393	0.036483	0.303007	0.341152	-0.05476	-0.32658	0.532466	1.10932	0.728665	0.064666	-0.0197	-0.11835	-0.29262	-0.14209	-0.31759	0.112165	-0.46978	0.955736	-0.01983	0.094272	-0.03238	-0.03707	-0.68867	-0.05935	-0.03535
1.9779	1.92399	2.24469	2.35275	2.00131	1.7909	1.19799	2.23009	1.23783	2.07534	1.05658	0.839972	1.61512	1.42451	1.01874	0.114187	1.97163	1.29007	0.624716	0.770889	0.589387	0.733164	0.28726	0.085969	1.02393	0.442328	0.038312	0.327389	0.350789	-0.06771	-0.36029	0.681642	1.09533	0.651269	0.111907	0.12832	-0.19362	-0.28148	-0.14188	-0.259	0.096079	-0.38345	0.953135	0.196397	0.145558	-0.05161	0.051993	-0.67769	0.002943	-0.07962
1.91592	1.93378	2.21644	2.37834	1.98829	1.71098	1.25199	2.18109	1.27323	2.08625	1.05668	0.898345	1.61305	1.38775	1.0007	0.179314	1.95253	1.2605	0.547974	0.705233	0.528767	0.741354	0.344386	0.108197	1.07727	0.367768	0.017278	0.349828	0.372489	-0.10168	-0.35387	0.849185	1.13985	0.646165	0.126473	0.205901	-0.19321	-0.20971	-0.14339	-0.19034	0.065429	-0.38892	0.971363	0.138895	0.195835	-0.02248	0.114553	-0.63152	0.021777	-0.21692
1.90498	1.94379	2.19906	2.39056	1.92428	1.63253	1.21955	2.0597	1.32862	2.08009	1.06274	0.905809	1.57496	1.34947	0.987691	0.273487	1.92613	1.24464	0.480473	0.715471	0.471864	0.782044	0.281188	0.120606	1.07895	0.276271	0.015034	0.34748	0.313863	-0.17124	-0.33381	0.907241	1.25868	0.585439	0.163432	0.324328	-0.15048	-0.21229	-0.22095	-0.19492	-0.01469	-0.52909	1.04933	0.061279	0.299549	-0.02658	0.234149	-0.6285	-0.02751	-0.30139
1.92928	1.9491	2.18695	2.36506	1.84256	1.56762	1.18891	1.99967	1.33387	2.07409	1.03731	0.870269	1.54789	1.31568	0.96521	0.329944	1.87653	1.19995	0.455311	0.669295	0.464054	0.844053	0.233708	0.088271	1.13122	0.316289	0.011845	0.346706	0.281099	-0.16307	-0.26298	0.977667	1.26912	0.487716	0.260165	0.347736	-0.12168	-0.19215	-0.26013	-0.22086	-0.06834	-0.7124	0.999352	-0.0503	0.41159	-0.03979	0.243827	-0.61573	-0.07749	-0.29077
1.95849	1.92874	2.18833	2.37257	1.76218	1.53661	1.17099	1.91847	1.31373	2.03635	1.0468	0.848805	1.51761	1.29587	0.925314	0.369398	1.86698	1.25861	0.417336	0.65382	0.462076	0.911326	0.216289	0.06359	1.10619	0.338446	0.002079	0.342817	0.306136	-0.11528	-0.2228	1.00627	1.04895	0.475667	0.356536	0.304206	-0.09565	-0.15286	-0.27681	-0.2103	-0.11922	-0.67096	0.941771	-0.12718	0.512213	0.000249	0.205633	-0.6064	-0.13086	-0.24746
1.90903	1.91919	2.15702	2.33362	1.72372	1.48257	1.15738	1.91984	1.23212	2.00954	1.02237	0.864268	1.48887	1.27559	0.870879	0.344407	1.95364	1.23446	0.378441	0.592941	0.420551	0.979731	0.128705	-0.04084	1.1016	0.323797	0.024468	0.30993	0.318635	-0.12041	-0.1763	1.09688	0.759277	0.538365	0.334956	0.217633	-0.05083	-0.09452	-0.3566	-0.21759	-0.02282	-0.3815	0.808299	0.002187	0.533575	0.011954	0.129281	-0.5672	-0.12938	-0.1646
1.86767	1.9144	2.12187	2.30486	1.71243	1.45886	1.1065	1.87099	1.16464	1.99505	1.02421	0.893436	1.47439	1.23746	0.790231	0.292043	2.00075	1.24695	0.302908	0.609675	0.361823	1.04357	0.054559	-0.0319	1.07855	0.110674	0.073645	0.296709	0.324879	-0.14634	-0.17421	1.17176	0.514148	0.646773	0.236745	0.18698	-0.03856	-0.07806	-0.45286	-0.19052	-0.01918	-0.12352	0.744616	0.161191	0.523243	0.043008	0.063675	-0.50967	-0.09006	-0.20987
1.83091	1.91181	2.09899	2.26866	1.69325	1.38973	1.0044	1.84995	1.12445	2.01972	0.998055	0.912925	1.46604	1.22791	0.731254	0.323838	2.02282	1.27426	0.249358	0.692268	0.315873	1.11459	-0.11787	-0.07066	1.02264	-0.03228	0.062825	0.333334	0.273117	-0.09184	-0.1526	1.26541	0.422337	0.632859	0.259556	0.212729	0.051879	-0.09486	-0.51257	-0.20698	0.008086	-0.09557	0.654802	0.403614	0.535021	0.039009	0.021365	-0.49614	-0.07311	-0.20291
1.85122	1.88625	2.08437	2.27816	1.62629	1.34048	0.953141	1.81559	1.07246	2.02678	0.990816	0.973996	1.45845	1.19024	0.675968	0.356008	1.98047	1.31689	0.187225	0.709045	0.34077	1.15194	-0.23192	0.018925	0.879158	-0.1743	-0.01769	0.368455	0.185698	0.010534	-0.16477	1.30715	0.438792	0.558388	0.302447	0.271247	0.019332	-0.03607	-0.59798	-0.22796	-0.08901	-0.17823	0.60729	0.324978	0.555181	0.081633	0.015723	-0.51043	-0.08419	-0.30851
1.87932	1.84773	2.07428	2.30145	1.56271	1.28576	0.91824	1.77133	1.03761	2.01459	0.956151	0.973753	1.43386	1.1561	0.632408	0.390936	1.94316	1.38523	0.140887	0.764321	0.36128	1.18021	-0.22507	0.037626	0.704896	-0.14653	-0.0591	0.355192	0.177288	0.112195	-0.2079	1.32101	0.518858	0.437057	0.391631	0.341119	0.04183	0.050047	-0.65529	-0.27081	-0.12298	-0.19262	0.55389	0.26328	0.576178	0.119289	0.038333	-0.53635	-0.07326	-0.35548
1.82771	1.8087	2.05716	2.28041	1.45873	1.25497	0.927093	1.69838	1.00978	2.00715	0.877159	0.906728	1.39706	1.11767	0.596732	0.430972	1.8651	1.45908	0.095664	0.674058	0.419188	1.18614	-0.20314	0.10737	0.561075	-0.11481	-0.11461	0.303388	0.141683	0.142045	-0.21669	1.26076	0.596417	0.273914	0.426824	0.559665	0.012235	0.120481	-0.70171	-0.24353	-0.19519	-0.11594	0.58318	0.319618	0.588327	0.106416	0.083629	-0.55706	-0.10378	-0.38113
1.76275	1.80073	2.03439	2.29907	1.41075	1.22274	0.944774	1.64904	1.00485	1.99783	0.799875	0.796005	1.38112	1.09548	0.578409	0.425383	1.85174	1.57272	0.043019	0.638688	0.423191	1.19386	-0.14034	0.0702	0.495039	-0.03216	-0.10711	0.290273	0.190859	0.137952	-0.23154	1.19986	0.581161	0.208318	0.515006	0.768343	0.098038	0.136174	-0.71704	-0.17873	-0.11008	-0.09229	0.520596	0.35281	0.722681	0.119671	0.152991	-0.59391	-0.11733	-0.34847
1.67453	1.79031	2.01819	2.30633	1.32675	1.21106	0.93214	1.64943	0.960703	1.99619	0.731542	0.763923	1.35022	1.08432	0.572019	0.481037	1.8157	1.61757	-0.0004	0.566605	0.434112	1.19051	-0.09852	0.045752	0.383192	0.038835	-0.17692	0.267767	0.165821	0.153698	-0.22315	1.2177	0.423569	0.229437	0.589378	0.934859	0.13141	0.191076	-0.76977	-0.10191	-0.06458	-0.07544	0.435598	0.277263	0.874482	0.090128	0.142903	-0.62395	-0.18546	-0.29634
1.69541	1.77374	1.99721	2.37266	1.31439	1.19253	0.972824	1.65263	0.913413	1.97016	0.67767	0.782046	1.34544	1.08127	0.546301	0.462542	1.86401	1.67515	-0.03929	0.44869	0.417057	1.20937	-0.07481	0.024153	0.366683	0.074302	-0.177	0.284757	0.170403	0.157131	-0.27879	1.28215	0.289433	0.410752	0.617836	0.924006	0.148495	0.198285	-0.80645	-0.0772	-0.03727	-0.10375	0.337738	0.076718	0.966273	0.102375	0.143257	-0.59133	-0.18486	-0.3533
1.66113	1.74156	1.99415	2.42385	1.32037	1.16057	1.00181	1.6599	0.873161	1.92874	0.650646	0.794723	1.32971	1.1121	0.535546	0.472697	1.84884	1.68719	-0.04977	0.420475	0.390791	1.25016	-0.05729	0.098632	0.313771	0.140742	-0.15154	0.248355	0.180493	0.161633	-0.307	1.33527	0.248461	0.405156	0.616546	0.96997	0.155818	0.233693	-0.76682	-0.05375	-0.18741	-0.04177	0.362889	-0.02974	0.939663	0.108648	0.104109	-0.52612	-0.20362	-0.42641
1.58884	1.726	1.99844	2.46881	1.35306	1.10314	1.08265	1.61918	0.846587	1.92339	0.596103	0.720217	1.33331	1.14014	0.531798	0.420105	1.87075	1.69729	-0.07598	0.327104	0.396075	1.28555	-0.08993	0.20692	0.288289	0.249551	-0.06928	0.288239	0.241086	0.134405	-0.34783	1.3359	0.257929	0.450232	0.640991	0.968114	0.245335	0.182312	-0.73704	-0.06454	-0.32904	0.028149	0.367869	-0.04601	0.873383	0.166353	0.125523	-0.48818	-0.18387	-0.47699
1.44852	1.69799	1.99323	2.48738	1.3698	1.05394	1.09869	1.59933	0.782457	1.90183	0.589665	0.6353	1.32703	1.17076	0.547795	0.399954	1.82995	1.70597	-0.10825	0.314546	0.394231	1.28283	-0.04767	0.294603	0.201474	0.295634	-0.04629	0.290025	0.29569	0.062188	-0.34466	1.33277	0.27317	0.460121	0.730973	0.943898	0.26526	0.195871	-0.69524	-0.05453	-0.39275	0.209538	0.369087	0.006649	0.84966	0.238937	0.089571	-0.4466	-0.16409	-0.49746
1.2908	1.65111	1.98551	2.41955	1.31731	1.0317	1.06476	1.53419	0.739111	1.91239	0.535762	0.523478	1.32242	1.1859	0.53882	0.363835	1.80446	1.7015	-0.14259	0.317751	0.472306	1.22684	0.121287	0.262019	0.161529	0.287192	-0.03106	0.359425	0.251832	0.022232	-0.36822	1.34487	0.230638	0.52322	0.852227	0.867218	0.210062	0.131589	-0.69087	-0.04465	-0.40009	0.316478	0.370229	0.253272	0.79636	0.301984	0.081415	-0.42726	-0.09886	-0.44521
1.1965	1.6205	1.95187	2.4128	1.30878	1.03028	1.01845	1.4211	0.684721	1.896	0.516086	0.467378	1.31473	1.23282	0.527759	0.393588	1.78906	1.7151	-0.16252	0.325255	0.471839	1.16588	0.291334	0.207722	0.193854	0.280934	-0.07269	0.363313	0.233587	-0.01292	-0.29056	1.37106	0.268292	0.541571	0.92681	0.880635	0.165343	0.168399	-0.68572	-0.02485	-0.3967	0.42888	0.418722	0.306988	0.743239	0.396886	0.078913	-0.41082	-0.05675	-0.48794
1.16386	1.58482	1.93766	2.40285	1.30083	1.00883	0.972352	1.38365	0.682629	1.88572	0.481193	0.431317	1.30472	1.23061	0.512907	0.374794	1.79747	1.66113	-0.18345	0.392149	0.469572	1.1112	0.306909	0.122339	0.20543	0.197294	-0.04978	0.39222	0.285583	-0.02345	-0.29295	1.41473	0.27252	0.483526	0.940243	0.968066	0.131837	0.178804	-0.74111	-0.04423	-0.41677	0.462474	0.476738	0.400232	0.644214	0.429649	0.143641	-0.42925	-0.024	-0.49338
1.21018	1.56593	1.91835	2.43525	1.31478	0.968229	0.952271	1.33795	0.682013	1.87496	0.47768	0.480767	1.30371	1.25684	0.499991	0.40146	1.79806	1.5757	-0.17739	0.355907	0.411025	1.07739	0.164102	0.108821	0.19301	0.168404	-0.04296	0.421263	0.416673	-0.06915	-0.27067	1.41698	0.336247	0.504189	0.819408	0.998857	0.173058	0.26334	-0.74288	-0.07377	-0.44688	0.466555	0.498326	0.205992	0.642058	0.424857	0.222306	-0.44189	-0.00788	-0.59783
1.27382	1.51152	1.90902	2.39713	1.27988	0.943899	0.90836	1.36492	0.650768	1.8424	0.473676	0.476155	1.29221	1.2431	0.487902	0.379526	1.75057	1.45071	-0.20432	0.328636	0.424257	1.05116	0.05172	0.059996	0.175284	0.17974	-0.03106	0.459024	0.501927	-0.09583	-0.36215	1.37685	0.421502	0.475189	0.720439	0.990922	0.068192	0.21703	-0.77059	-0.08999	-0.40878	0.470198	0.538739	0.076156	0.636583	0.403925	0.257029	-0.46405	0.018548	-0.65716
1.33304	1.48663	1.90278	2.37787	1.24271	0.943699	0.851721	1.31305	0.599069	1.81783	0.459492	0.493829	1.28178	1.27091	0.47622	0.350709	1.66509	1.35333	-0.18644	0.337867	0.419957	1.01551	0.090423	0.029094	0.135488	0.335182	0.022278	0.497213	0.51097	-0.13392	-0.34788	1.30192	0.38687	0.457253	0.698998	1.00746	0.070359	0.249402	-0.78203	-0.08988	-0.40462	0.411396	0.497504	-0.01667	0.727948	0.362659	0.280623	-0.46922	-0.03235	-0.69681
1.38137	1.46093	1.90932	2.34578	1.21948	0.950562	0.82556	1.32103	0.539726	1.80438	0.434397	0.436965	1.26441	1.24392	0.500361	0.287657	1.6132	1.2841	-0.21846	0.332629	0.433569	0.992931	0.078597	0.013826	0.159854	0.510895	0.062359	0.514291	0.491492	-0.14061	-0.32726	1.26403	0.35173	0.460891	0.762116	1.08409	0.005061	0.184493	-0.82044	-0.05058	-0.37248	0.44991	0.537776	0.035105	0.822823	0.380185	0.227944	-0.46315	-0.07759	-0.68051
1.41425	1.44139	1.9079	2.36599	1.20352	0.930666	0.788679	1.26854	0.506269	1.7791	0.396668	0.42402	1.22147	1.2207	0.494369	0.224205	1.54239	1.23971	-0.19466	0.441617	0.396202	0.946916	-0.02672	-0.00667	0.122802	0.571018	0.15755	0.517221	0.463125	-0.1314	-0.21718	1.259	0.255659	0.509422	0.749132	1.0834	0.032789	0.216132	-0.80389	-0.05466	-0.35425	0.443553	0.535154	0.057825	1.00813	0.359172	0.227131	-0.44699	-0.09926	-0.70758
1.39024	1.39949	1.91343	2.3465	1.16997	0.8886	0.771608	1.26294	0.475487	1.7505	0.39289	0.414259	1.1998	1.16313	0.499816	0.185459	1.46542	1.21845	-0.21733	0.441964	0.379246	0.905503	-0.18696	0.019796	0.132292	0.685864	0.186822	0.533808	0.42931	-0.09332	-0.17116	1.24127	0.290916	0.542225	0.65022	1.03055	0.035728	0.227543	-0.75136	-0.04722	-0.35428	0.423986	0.568748	0.144159	1.10694	0.37747	0.155622	-0.46026	-0.08616	-0.78335
1.39927	1.36923	1.91104	2.36533	1.1564	0.865575	0.6705	1.23506	0.46541	1.73757	0.391778	0.367242	1.20546	1.14658	0.475513	0.178107	1.33245	1.16665	-0.18849	0.632755	0.360122	0.83764	-0.27339	0.048226	0.067172	0.667335	0.186997	0.58556	0.40782	-0.05689	-0.18166	1.22623	0.230099	0.512251	0.542771	0.968729	0.062346	0.233739	-0.71709	-0.08132	-0.36873	0.36386	0.534127	0.181538	1.18395	0.334584	0.106437	-0.44738	-0.09173	-0.78722
1.40273	1.32434	1.9121	2.36205	1.16332	0.837226	0.618911	1.22379	0.450009	1.76009	0.406295	0.359432	1.25205	1.12274	0.46599	0.157624	1.24966	1.10918	-0.14781	0.677285	0.355834	0.785096	-0.24754	0.064964	0.034498	0.664784	0.131701	0.639899	0.369561	-0.04296	-0.25645	1.19467	0.146134	0.52554	0.499717	0.938898	0.091001	0.276524	-0.75236	-0.08664	-0.39818	0.345914	0.479949	0.254557	1.12791	0.323136	0.032891	-0.43979	-0.12092	-0.78452
1.39609	1.29619	1.8867	2.34216	1.16631	0.805938	0.604418	1.19133	0.421372	1.77331	0.383785	0.294435	1.26761	1.10644	0.425582	0.112683	1.20464	1.04652	-0.11703	0.674852	0.36772	0.754628	-0.21496	0.044736	0.005441	0.572361	0.129947	0.634446	0.424197	-0.0693	-0.31428	1.16566	0.12086	0.587762	0.489181	0.884527	0.030485	0.238476	-0.81644	-0.12123	-0.39416	0.426047	0.488394	0.166822	1.06903	0.314543	-0.02571	-0.38663	-0.10231	-0.73334
1.34566	1.25236	1.8589	2.30396	1.15716	0.758341	0.61404	1.17575	0.376191	1.7687	0.397828	0.252357	1.2628	1.05942	0.402955	0.071479	1.19319	1.06014	-0.12551	0.532775	0.354989	0.770146	-0.17271	-0.02306	0.061777	0.578749	0.170196	0.612909	0.435257	-0.08357	-0.3224	1.13356	0.182973	0.637352	0.517251	0.835433	0.021361	0.248201	-0.86641	-0.15804	-0.37795	0.434477	0.468425	0.095867	0.988325	0.32617	-0.08531	-0.39058	-0.10625	-0.83241
1.23877	1.23387	1.82973	2.22575	1.13243	0.711719	0.617874	1.17584	0.331696	1.72617	0.415185	0.189684	1.23724	1.02572	0.360997	0.030667	1.18659	1.12571	-0.18732	0.432789	0.344863	0.771739	-0.14247	-0.02754	0.069736	0.486729	0.239788	0.609204	0.458576	-0.1021	-0.32668	1.10708	0.332106	0.605655	0.582404	0.80003	0.019809	0.251822	-0.85545	-0.18116	-0.41213	0.437724	0.535179	0.102799	0.974339	0.286417	-0.16984	-0.40506	-0.13136	-0.85344
1.14409	1.20655	1.82653	2.17276	1.12117	0.697753	0.603844	1.20997	0.267778	1.72855	0.430001	0.128946	1.23371	1.00049	0.342363	0.042164	1.21823	1.16146	-0.20378	0.373877	0.309967	0.767947	-0.08376	-0.02749	0.175087	0.445726	0.246289	0.649678	0.393466	-0.12413	-0.32947	1.12568	0.373297	0.662155	0.624938	0.732467	0.047181	0.30178	-0.83977	-0.17296	-0.43175	0.38026	0.64139	0.147597	1.04584	0.294069	-0.16988	-0.43804	-0.13665	-0.98561
1.09935	1.18622	1.76853	2.12675	1.13276	0.668423	0.57702	1.21111	0.220501	1.61283	0.41703	0.140542	1.17894	0.919794	0.25367	-0.00768	1.19016	1.11582	-0.20484	0.409194	0.25196	0.747002	-0.08591	-0.00729	0.15577	0.441573	0.244015	0.527121	0.324643	-0.17491	-0.31801	1.1098	0.343603	0.652754	0.616723	0.652642	0.081332	0.355293	-0.82851	-0.20389	-0.42854	0.374574	0.716394	0.166019	1.15685	0.257899	-0.17606	-0.4463	-0.1322	-0.98197
1.16526	1.15254	1.77122	2.12495	1.0988	0.643535	0.564578	1.17494	0.17203	1.62937	0.375044	0.058617	1.17249	0.869487	0.228437	-0.01292	1.14573	0.97858	-0.19697	0.439339	0.258575	0.735508	-0.13487	-0.00711	0.193553	0.411183	0.234931	0.504959	0.294174	-0.21725	-0.2987	1.04796	0.309943	0.769118	0.496435	0.50877	0.009842	0.303368	-0.85907	-0.22273	-0.3936	0.361893	0.677855	0.060166	1.2327	0.275261	-0.2149	-0.40348	-0.14192	-1.02089
1.20476	1.11947	1.74296	2.141	1.07079	0.618971	0.469346	1.06992	0.170512	1.60125	0.36062	0.009024	1.14604	0.802963	0.202677	-0.05403	0.994682	0.895292	-0.21914	0.577083	0.261206	0.732532	-0.13582	-0.07684	0.157629	0.432263	0.226562	0.492925	0.271218	-0.21617	-0.26771	0.933623	0.256854	0.61554	0.382183	0.460005	0.056799	0.261897	-0.84338	-0.27291	-0.36343	0.355564	0.541445	-0.06311	1.26398	0.195941	-0.30912	-0.42439	-0.20167	-0.90026
1.1602	1.10102	1.79458	2.12377	1.00069	0.607158	0.44727	0.947352	0.136285	1.72213	0.32617	0.005907	1.17271	0.830694	0.248351	-0.02727	0.914814	0.902172	-0.21609	0.555566	0.329047	0.722902	-0.05802	-0.16621	0.15312	0.318403	0.249355	0.637822	0.281301	-0.23051	-0.23931	0.846716	0.30038	0.548638	0.358395	0.463639	0.086176	0.21902	-0.83248	-0.28015	-0.34523	0.377327	0.514476	-0.11067	1.22553	0.199599	-0.38068	-0.45403	-0.24921	-0.83769
1.03123	1.08347	1.79209	2.06212	0.980662	0.585985	0.41733	0.908121	0.122363	1.72882	0.32436	0.042124	1.15875	0.802569	0.25053	-0.05278	0.882423	0.929451	-0.17565	0.542318	0.33875	0.721049	0.071621	-0.22051	0.187203	0.399754	0.281091	0.691114	0.223068	-0.24213	-0.21861	0.832958	0.230627	0.479192	0.434233	0.498033	0.201382	0.260377	-0.82862	-0.27291	-0.28308	0.421402	0.566799	-0.03686	1.26852	0.205824	-0.37981	-0.50468	-0.22323	-0.80291
0.950317	1.07651	1.80021	2.0106	0.949669	0.541049	0.47428	0.84129	0.078616	1.73641	0.308722	0.122171	1.14405	0.778988	0.250764	-0.06997	0.842267	0.921478	-0.11893	0.448676	0.356192	0.713987	0.12354	-0.24284	0.125234	0.443701	0.324761	0.715575	0.229297	-0.25271	-0.22154	0.738222	0.366669	0.470957	0.521017	0.472554	0.219208	0.254155	-0.84607	-0.24056	-0.25768	0.45722	0.673757	-0.05955	1.27537	0.228908	-0.40392	-0.58648	-0.23573	-0.82148
0.906889	1.04118	1.76308	1.97341	0.931689	0.513998	0.470052	0.867566	0.052432	1.68668	0.316848	0.117585	1.12051	0.731764	0.230445	-0.13496	0.830926	0.83058	-0.09875	0.422016	0.317915	0.709165	0.090182	-0.24642	0.157358	0.551935	0.360884	0.686776	0.228804	-0.26598	-0.23187	0.672679	0.459195	0.526934	0.483818	0.423393	0.203101	0.301967	-0.94916	-0.21459	-0.25094	0.401533	0.764938	-0.06359	1.3184	0.187828	-0.35139	-0.62253	-0.18463	-0.81931
0.890407	1.01283	1.74438	1.95359	0.90403	0.492996	0.44645	0.790722	0.043035	1.68553	0.303541	0.116932	1.11333	0.733666	0.230137	-0.15451	0.786381	0.811648	-0.11894	0.388082	0.314481	0.707541	0.123551	-0.30305	0.174724	0.596231	0.36911	0.700932	0.239405	-0.27908	-0.24939	0.615907	0.548195	0.480949	0.382843	0.434639	0.151929	0.22017	-0.93857	-0.17939	-0.19742	0.368469	0.821591	-0.14927	1.30081	0.146982	-0.26555	-0.64275	-0.14293	-0.73218
0.880643	0.984364	1.74096	1.92255	0.890026	0.495098	0.404507	0.78863	0.01646	1.69947	0.277532	0.072547	1.1131	0.750418	0.210886	-0.12996	0.789471	0.826394	-0.1271	0.384001	0.30188	0.672085	0.171169	-0.29911	0.233095	0.615403	0.361794	0.731123	0.218283	-0.28633	-0.2639	0.625406	0.52016	0.557553	0.366242	0.460209	0.112789	0.182216	-0.93294	-0.16461	-0.1641	0.314599	0.856749	-0.14763	1.32153	0.14816	-0.16043	-0.60616	-0.06587	-0.69884
0.885615	0.964756	1.76337	1.91671	0.866433	0.493879	0.434522	0.753664	-0.02775	1.74139	0.26264	0.009585	1.13782	0.76748	0.20866	-0.07845	0.745875	0.858979	-0.11052	0.262109	0.334714	0.625757	0.195704	-0.33057	0.233892	0.613317	0.344162	0.815183	0.198515	-0.22032	-0.29668	0.590437	0.540178	0.520691	0.437793	0.515943	0.054215	0.153411	-0.85185	-0.15321	-0.09144	0.299462	0.824262	-0.2523	1.35092	0.151441	-0.14991	-0.60936	-0.05305	-0.66295
0.856043	0.939269	1.74553	1.95571	0.85015	0.473396	0.44297	0.80315	-0.10313	1.73695	0.254521	0.009499	1.13875	0.739824	0.166945	-0.0755	0.684717	0.870576	-0.04924	0.272029	0.297088	0.585683	0.067285	-0.31647	0.194369	0.613636	0.324226	0.82391	0.257524	-0.16064	-0.2994	0.53551	0.525093	0.550589	0.484644	0.532483	0.107894	0.302084	-0.86098	-0.16541	-0.13896	0.164934	0.848843	-0.33835	1.32594	0.147717	-0.12153	-0.64144	-0.07153	-0.71657
0.848785	0.912714	1.71457	1.94818	0.840008	0.46171	0.462974	0.822407	-0.14706	1.72287	0.241715	-0.00127	1.13944	0.730645	0.167157	-0.12199	0.611654	0.810528	-0.00957	0.186502	0.267293	0.569762	-0.08699	-0.33608	0.182018	0.520797	0.354727	0.829585	0.342762	-0.08407	-0.29651	0.508453	0.469276	0.538459	0.467645	0.579506	0.074155	0.332427	-0.91575	-0.19124	-0.13778	0.120325	0.790587	-0.36235	1.27094	0.149909	-0.15895	-0.6863	-0.10497	-0.70882
0.818946	0.882726	1.68605	1.92542	0.846189	0.440363	0.412215	0.803019	-0.17575	1.69608	0.205787	-0.06233	1.11984	0.708309	0.138737	-0.17372	0.57317	0.803572	0.013761	0.237973	0.205513	0.556539	-0.18856	-0.33623	0.179391	0.518223	0.374286	0.858106	0.42704	-0.07745	-0.274	0.500968	0.371228	0.52822	0.348243	0.563491	0.058801	0.291571	-0.9071	-0.20745	-0.16965	0.165655	0.777868	-0.29404	1.2422	0.150672	-0.15901	-0.7027	-0.14312	-0.70657
0.809325	0.86075	1.6813	1.88794	0.839504	0.434805	0.411142	0.717029	-0.17868	1.67796	0.177749	-0.11998	1.10589	0.708021	0.151303	-0.22084	0.577719	0.76217	0.03541	0.147238	0.217635	0.54449	-0.2041	-0.38126	0.203086	0.508879	0.459423	0.854983	0.457541	-0.07408	-0.27835	0.485759	0.398359	0.543385	0.301048	0.609844	0.01846	0.20128	-0.893	-0.19927	-0.14147	0.19752	0.737253	-0.23733	1.24641	0.138396	-0.15444	-0.71104	-0.17477	-0.70337
0.78436	0.82604	1.68569	1.89985	0.80482	0.409379	0.385644	0.667058	-0.20226	1.65847	0.189065	-0.15021	1.0903	0.68612	0.143761	-0.28508	0.607705	0.715544	0.0472	0.175253	0.201344	0.511325	-0.19947	-0.44402	0.219391	0.644989	0.510576	0.869806	0.452127	-0.11193	-0.27539	0.473749	0.394209	0.535166	0.245462	0.671201	0.046503	0.193604	-0.88269	-0.17209	-0.07087	0.161168	0.752507	-0.17409	1.27177	0.106657	-0.08099	-0.67077	-0.17206	-0.6546
0.759845	0.804907	1.67584	1.89971	0.787432	0.376924	0.36137	0.631918	-0.22335	1.62199	0.19197	-0.12228	1.07892	0.664576	0.140708	-0.35216	0.598816	0.5696	0.061963	0.21302	0.16359	0.472228	-0.18534	-0.46806	0.268879	0.700483	0.579552	0.841325	0.484236	-0.13758	-0.28219	0.464387	0.439157	0.555881	0.293568	0.738594	0.041599	0.256963	-0.81346	-0.15676	-0.04261	0.06085	0.743301	-0.18038	1.2736	0.097796	-0.03027	-0.67722	-0.15541	-0.63669
0.742165	0.769468	1.68718	1.85908	0.774306	0.360146	0.282294	0.656929	-0.25329	1.60475	0.192007	-0.15387	1.08045	0.647886	0.131855	-0.40891	0.574927	0.56231	0.039305	0.355091	0.109509	0.422927	-0.1543	-0.41676	0.255871	0.794049	0.590612	0.876465	0.466231	-0.12173	-0.27541	0.437356	0.494939	0.511196	0.284346	0.786016	0.034449	0.265916	-0.82373	-0.14908	-0.06112	0.044598	0.710791	-0.13214	1.28227	0.081698	-0.0725	-0.64454	-0.15823	-0.56246
0.702179	0.732799	1.6924	1.82212	0.758215	0.338763	0.213696	0.575078	-0.2745	1.59003	0.166173	-0.2201	1.06848	0.620986	0.124263	-0.45676	0.515603	0.518075	0.021029	0.446407	0.1059	0.382087	-0.18318	-0.39012	0.302535	0.856494	0.640439	0.848825	0.450319	-0.08742	-0.28093	0.420393	0.492378	0.500243	0.278352	0.75147	-0.03289	0.311896	-0.78945	-0.13476	-0.10356	0.068557	0.645133	-0.08778	1.25253	0.063811	-0.1098	-0.63517	-0.14829	-0.49131
0.644246	0.681446	1.70333	1.80348	0.732911	0.324853	0.206904	0.552403	-0.27212	1.5821	0.173084	-0.24335	1.06781	0.602139	0.139358	-0.49048	0.479412	0.523385	0.047955	0.458908	0.097937	0.366123	-0.1616	-0.35469	0.288987	0.919549	0.651994	0.825289	0.400975	-0.07066	-0.27073	0.380818	0.560691	0.536649	0.244646	0.761263	-0.03363	0.309858	-0.85141	-0.11343	-0.07801	0.098121	0.647054	-0.00618	1.20191	0.086168	-0.10945	-0.61727	-0.15703	-0.43852
0.645647	0.649504	1.6724	1.80739	0.726835	0.292826	0.233348	0.570859	-0.3046	1.56263	0.167714	-0.28002	1.07556	0.574071	0.146893	-0.53666	0.436669	0.436832	0.083651	0.364571	0.092141	0.336816	-0.19464	-0.36504	0.361149	0.982319	0.67074	0.810953	0.4063	-0.03731	-0.26236	0.365136	0.518458	0.538625	0.264084	0.734258	-0.10014	0.311029	-0.80318	-0.12738	-0.06483	0.100966	0.60228	0.060873	1.20481	0.072712	-0.12775	-0.63488	-0.14076	-0.45669
0.670017	0.619433	1.6619	1.77653	0.749056	0.271507	0.247307	0.587264	-0.31133	1.54523	0.180215	-0.25714	1.0887	0.569922	0.149249	-0.58336	0.390135	0.415878	0.120875	0.316394	0.04743	0.315894	-0.21183	-0.34177	0.313064	1.01034	0.67605	0.85544	0.417078	-0.02341	-0.22256	0.293813	0.53338	0.463629	0.273621	0.744289	-0.04931	0.328224	-0.72536	-0.13832	-0.08506	0.071293	0.560811	-0.05288	1.24388	0.062141	-0.17122	-0.66581	-0.16386	-0.47574
0.721463	0.600142	1.64451	1.77496	0.746552	0.245647	0.210581	0.526323	-0.34496	1.53634	0.168223	-0.27506	1.07672	0.536599	0.129138	-0.63281	0.325103	0.436468	0.133357	0.375872	0.051923	0.289266	-0.25296	-0.28221	0.275394	1.0197	0.724323	0.885779	0.427449	-0.03268	-0.16221	0.283362	0.342461	0.482027	0.241642	0.661818	-0.01878	0.311872	-0.69923	-0.15336	-0.18068	0.031879	0.396248	-0.14272	1.28999	0.058217	-0.21802	-0.6767	-0.18182	-0.50023
0.708913	0.562519	1.63885	1.75544	0.721531	0.257138	0.167325	0.425334	-0.36664	1.52046	0.169175	-0.24763	1.06975	0.519661	0.129528	-0.67298	0.271517	0.434615	0.133815	0.432031	0.023405	0.270299	-0.31829	-0.2314	0.154716	0.960866	0.778383	0.908624	0.373246	-0.04204	-0.15235	0.247923	0.209136	0.467799	0.207426	0.573326	0.010847	0.353689	-0.65514	-0.16301	-0.23671	0.060115	0.28015	-0.18452	1.24747	0.071305	-0.29136	-0.6789	-0.18953	-0.42658
0.714066	0.539385	1.61225	1.75134	0.669874	0.238733	0.154011	0.39869	-0.41036	1.49394	0.16646	-0.20859	1.06838	0.493866	0.14042	-0.6899	0.221073	0.3824	0.096149	0.40911	0.046152	0.241859	-0.32108	-0.17207	0.100814	0.947461	0.791955	0.888306	0.341253	-0.05057	-0.14326	0.273595	0.071176	0.553279	0.140748	0.504624	-0.01787	0.372485	-0.77733	-0.14728	-0.25431	0.095136	0.153908	-0.13787	1.19739	0.101942	-0.32289	-0.66948	-0.20353	-0.42471
0.670842	0.518588	1.5919	1.67385	0.632143	0.226519	0.146649	0.421127	-0.45723	1.47677	0.162033	-0.1593	1.05513	0.466238	0.174578	-0.71122	0.174599	0.366334	0.05989	0.285789	0.074784	0.202756	-0.33996	-0.19338	0.083678	0.965986	0.816009	0.870448	0.276692	-0.04955	-0.16026	0.275021	-0.02499	0.528793	0.218794	0.424928	-0.07871	0.446403	-0.80089	-0.14292	-0.227	0.160033	0.155509	-0.07951	1.14917	0.11504	-0.36994	-0.62957	-0.15497	-0.38411
0.61222	0.509478	1.59051	1.62601	0.594716	0.190107	0.140445	0.367975	-0.4492	1.46787	0.175957	-0.13328	1.02021	0.415386	0.198511	-0.72455	0.122033	0.31995	0.072383	0.289038	0.084029	0.183111	-0.35293	-0.21591	0.113654	1.0117	0.809793	0.846441	0.275338	-0.08842	-0.11376	0.245809	-0.054	0.511655	0.230797	0.388933	-0.06468	0.40451	-0.85174	-0.11425	-0.2375	0.159685	0.145839	-0.01427	1.21792	0.165371	-0.35812	-0.62717	-0.15129	-0.45114
0.529334	0.508685	1.57262	1.5402	0.568306	0.185555	0.133268	0.36284	-0.44166	1.45603	0.188562	-0.18065	0.987137	0.375341	0.193438	-0.7548	0.13911	0.322015	0.112934	0.303856	0.051423	0.183587	-0.26498	-0.21547	0.092983	1.01839	0.858575	0.843898	0.232074	-0.09979	-0.10003	0.210043	-0.03896	0.565579	0.296596	0.324268	-0.10547	0.32856	-0.76992	-0.10614	-0.28435	0.168876	0.234794	-0.05364	1.24941	0.216778	-0.37975	-0.5976	-0.09789	-0.51307
0.498231	0.473786	1.57013	1.52591	0.549768	0.162855	0.150394	0.31483	-0.44567	1.44012	0.204148	-0.23199	0.990736	0.376693	0.148695	-0.7537	0.132464	0.257664	0.136008	0.316827	-0.02105	0.184011	-0.13159	-0.24334	0.061832	0.999367	0.829863	0.8561	0.27485	-0.09845	-0.08037	0.114219	0.003958	0.498435	0.277514	0.338555	-0.08529	0.286737	-0.69072	-0.08044	-0.28878	0.136243	0.246524	-0.09213	1.29846	0.215603	-0.40045	-0.61448	-0.08837	-0.51143
0.468934	0.43525	1.5537	1.52172	0.529374	0.167531	0.191036	0.386889	-0.49017	1.41861	0.229589	-0.30898	0.991796	0.369665	0.103222	-0.75259	0.139706	0.246032	0.119127	0.23439	-0.03779	0.17331	0.046291	-0.26231	0.053778	0.989027	0.833078	0.872955	0.234319	-0.10839	-0.11243	0.066874	0.012213	0.552852	0.343442	0.280746	-0.11399	0.220776	-0.72296	-0.09307	-0.27906	0.15879	0.299214	-0.24428	1.21532	0.221313	-0.42109	-0.58614	-0.073	-0.48151
0.446884	0.385162	1.54369	1.53889	0.543913	0.169708	0.199146	0.418755	-0.53676	1.41143	0.214353	-0.3634	1.0094	0.359285	0.11112	-0.73066	0.123976	0.257021	0.086733	0.177176	-0.06467	0.162555	0.025233	-0.26038	0.084418	0.948064	0.778711	0.894899	0.257696	-0.12295	-0.09609	0.02161	0.046339	0.566663	0.362259	0.192675	-0.12268	0.234974	-0.67384	-0.0955	-0.30149	0.15571	0.296063	-0.27288	1.21602	0.215154	-0.38884	-0.60174	-0.03193	-0.45116
[truncated: 37 more columns]

## Sheet: Ctrl_hot
1	2	3	4	5	6	7	8	9	10	11	12	13	14	15	16	17	18	19	20	21	22	23	24	25	26	27	28	29	30	31	32	33	34	35	36	37	38	39	40	41	42	43	44	45	46	47	48	49	50
-0.436385	-0.671732	-0.700963	-0.640983	-0.60474	-0.019915	-0.612702	-0.547211	-0.736444	-0.325779	-0.605036	-0.612746	-0.716913	-0.355063	-0.364513	-0.412748	-0.627047	-0.155394	-0.10908	-0.140529	0.2214	-0.683265	-0.0607419	-0.0631591	-0.38032	-0.0580248	-0.0538425	-0.372714	-0.116176	-0.0527308	-0.554573	-0.681364	-0.139086	0.0865285	-0.180086	-0.543154	-0.361642	-0.17472	0.392218	-0.304269	0.0907054	-0.0433346	0.102035	0.0830091	0.153546	-0.447798	0.0470918	0.0902939	0.0925529	0.322064
-0.407664	-0.692965	-0.713297	-0.607452	-0.595433	-0.041642	-0.602031	-0.527866	-0.722506	-0.358057	-0.596104	-0.642774	-0.739864	-0.404317	-0.353359	-0.428319	-0.618742	-0.179566	-0.0934841	-0.110513	0.235228	-0.705447	-0.0754809	-0.0653845	-0.36088	0.037674	-0.0435355	-0.409017	-0.152123	-0.0157064	-0.565479	-0.693445	-0.177236	0.112482	-0.251188	-0.577368	-0.364573	-0.177805	0.346299	-0.3012	0.0804158	-0.0870652	0.127543	0.001798	0.074936	-0.472962	0.0344953	0.0741983	0.108791	0.355996
-0.378565	-0.698841	-0.711518	-0.571419	-0.606828	-0.0281491	-0.594502	-0.499153	-0.711813	-0.378238	-0.572597	-0.689766	-0.743203	-0.398359	-0.312516	-0.405049	-0.632211	-0.154919	-0.0831735	-0.0599138	0.231144	-0.724433	-0.11916	-0.0845784	-0.388185	0.0639753	-0.0454424	-0.4163	-0.170675	-0.0425484	-0.550751	-0.738414	-0.220413	-0.101359	-0.279746	-0.585218	-0.293234	-0.177094	0.39429	-0.351536	0.0602892	-0.148428	0.106004	-0.0963019	0.124312	-0.561192	-0.0153423	0.0287628	0.0692285	0.460033
-0.384007	-0.686602	-0.708645	-0.58136	-0.601324	-0.006454	-0.568331	-0.542619	-0.650945	-0.383275	-0.558842	-0.671205	-0.759215	-0.447002	-0.308146	-0.386913	-0.632501	-0.182692	-0.0487746	-0.0951481	0.19577	-0.741359	-0.101709	-0.0493173	-0.372152	0.129259	-0.0727265	-0.435274	-0.108296	-0.0424753	-0.510824	-0.779076	-0.159612	-0.0553252	-0.384011	-0.571626	-0.356042	-0.143062	0.362719	-0.361273	0.0563207	-0.178514	0.100058	-0.0547964	0.130338	-0.555578	-0.0357295	0.011353	0.0611397	0.399829
-0.421776	-0.674094	-0.706238	-0.594545	-0.613312	0.0101785	-0.549139	-0.569208	-0.615768	-0.39676	-0.556455	-0.670048	-0.76109	-0.465909	-0.305638	-0.390782	-0.62107	-0.219822	-0.0377396	-0.0765142	0.155228	-0.744793	-0.0788483	-0.0807596	-0.373123	0.0102113	-0.083579	-0.436835	-0.0614715	-0.0759277	-0.528894	-0.773588	-0.137476	-0.0576821	-0.382056	-0.549862	-0.407542	-0.181847	0.399683	-0.393451	0.110855	-0.194004	0.0165451	-0.0312472	0.201774	-0.549387	-0.0209711	-0.0022434	0.0916819	0.400888
-0.448962	-0.6617	-0.703987	-0.574094	-0.59793	0.0055274	-0.50462	-0.600614	-0.572491	-0.397424	-0.541186	-0.609254	-0.754319	-0.488096	-0.323045	-0.45035	-0.595462	-0.264925	-0.042689	-0.104713	0.16928	-0.740217	-0.078038	-0.101609	-0.320862	0.0800442	-0.0523636	-0.420134	0.0163619	-0.118603	-0.565118	-0.743221	-0.126778	0.0967541	-0.362013	-0.538226	-0.450408	-0.167293	0.333327	-0.371917	0.118956	-0.147955	0.0315025	0.0225702	0.182113	-0.509757	0.0098723	0.003125	0.130995	0.343049
-0.467421	-0.658464	-0.725523	-0.557519	-0.609694	0.0150087	-0.491452	-0.579034	-0.591884	-0.435497	-0.502308	-0.596289	-0.769734	-0.514404	-0.352455	-0.475321	-0.57096	-0.322442	-0.0639036	-0.15827	0.186246	-0.74648	-0.0901037	-0.0703324	-0.294254	-0.0030473	-0.0167849	-0.471891	0.0664008	-0.157633	-0.598114	-0.682961	-0.136584	0.231698	-0.259575	-0.616458	-0.461144	-0.0915993	0.284193	-0.310205	0.121256	-0.0996588	0.0656298	-0.0438442	0.116203	-0.502112	0.0039095	-0.0174954	0.123593	0.291763
-0.491671	-0.672109	-0.714199	-0.562255	-0.585976	0.0406459	-0.516012	-0.606922	-0.571281	-0.451241	-0.490772	-0.616372	-0.789821	-0.522256	-0.395668	-0.479711	-0.56429	-0.317069	-0.0778035	-0.101636	0.148037	-0.744095	-0.0882271	-0.0268616	-0.290775	0.127412	0.0066711	-0.494833	0.111322	-0.201624	-0.618371	-0.667636	-0.175587	0.24779	-0.247537	-0.64474	-0.408699	-0.113902	0.294159	-0.247025	0.0612879	-0.0139261	0.144371	0.0482396	0.103232	-0.481589	-0.0052337	-0.0331164	0.083126	0.287581
-0.474519	-0.6769	-0.70671	-0.633258	-0.61298	0.0630392	-0.502684	-0.639575	-0.607137	-0.444272	-0.53331	-0.603114	-0.804772	-0.559053	-0.425437	-0.4559	-0.59946	-0.28216	-0.0891604	-0.116799	0.138683	-0.757929	-0.0734226	-0.0199652	-0.360508	0.135156	-0.0178851	-0.525431	0.0769486	-0.170252	-0.560059	-0.659446	-0.163185	0.153101	-0.201847	-0.623841	-0.439284	-0.144704	0.26733	-0.25256	0.0053701	-0.0039111	0.145764	0.0775073	0.11337	-0.460909	-0.0406539	-0.0608759	0.0294524	0.26441
-0.465689	-0.689384	-0.683983	-0.650703	-0.611849	0.0468151	-0.53819	-0.660192	-0.60096	-0.420377	-0.568956	-0.572768	-0.794606	-0.527463	-0.423296	-0.442647	-0.650165	-0.23506	-0.0893335	0.015588	0.121573	-0.759515	-0.1227	-0.0709777	-0.413832	0.25317	-0.0465599	-0.457009	0.0720613	-0.170348	-0.606836	-0.686809	-0.220136	-0.00894132	-0.225188	-0.551312	-0.443645	-0.229925	0.286709	-0.24566	-0.0179072	0.031879	0.134029	0.129359	0.161595	-0.461957	-0.0413596	-0.0721033	0.00407906	0.365097
-0.431888	-0.677148	-0.695655	-0.657627	-0.620551	0.028072	-0.509084	-0.603297	-0.627218	-0.421886	-0.581424	-0.504665	-0.781298	-0.515714	-0.400069	-0.478386	-0.699367	-0.30267	-0.0386786	-0.0177906	0.127693	-0.784124	-0.182652	-0.106387	-0.491971	0.229882	-0.0537733	-0.470369	0.0516071	-0.121531	-0.577816	-0.680096	-0.207997	0.00508805	-0.145246	-0.562313	-0.470619	-0.179066	0.304517	-0.245342	-0.00820041	0.0360338	0.150982	0.101661	0.10081	-0.430126	-0.0469869	-0.0944568	0.0214303	0.39093
-0.393019	-0.686505	-0.705438	-0.652647	-0.602173	0.0458659	-0.57087	-0.551805	-0.628577	-0.434531	-0.572602	-0.483576	-0.776223	-0.472445	-0.417594	-0.496258	-0.699222	-0.39335	0.0173319	-0.0076705	0.131668	-0.781659	-0.226591	-0.150649	-0.491501	0.157038	-0.0524384	-0.49117	0.0714733	-0.146937	-0.630162	-0.684729	-0.240791	0.0546973	-0.158652	-0.578119	-0.496129	-0.185729	0.324675	-0.210821	0.0559821	0.00910023	0.181735	0.135464	0.0447257	-0.403375	0.013765	-0.109515	0.0323455	0.481491
-0.352612	-0.683757	-0.714069	-0.657567	-0.579315	0.0578524	-0.555287	-0.542168	-0.616472	-0.447044	-0.567076	-0.443925	-0.78501	-0.471766	-0.396017	-0.500529	-0.694879	-0.483501	0.100385	-0.0428175	0.133229	-0.788711	-0.177004	-0.138884	-0.492428	0.0672297	-0.0572554	-0.560055	0.0797558	-0.171863	-0.620113	-0.655421	-0.205341	0.071704	-0.14716	-0.535459	-0.472642	-0.145015	0.390112	-0.194986	0.0234129	-0.0578328	0.187726	0.157843	0.0419137	-0.353596	0.0529163	-0.122718	0.019987	0.439808
-0.350743	-0.693162	-0.714743	-0.650734	-0.588857	0.0522914	-0.560111	-0.528121	-0.597909	-0.452691	-0.572351	-0.436767	-0.790758	-0.494852	-0.383786	-0.470106	-0.708909	-0.510148	0.0987603	-0.00017061	0.178791	-0.775118	-0.142487	-0.125645	-0.449621	0.00194724	-0.0899957	-0.589319	0.0546761	-0.186114	-0.651194	-0.671858	-0.20443	-0.0450524	-0.192907	-0.463404	-0.507194	-0.102938	0.349089	-0.219159	0.00076836	-0.120892	0.197054	0.153476	0.0399498	-0.333968	0.0178511	-0.120037	0.0023751	0.470301
-0.361018	-0.690789	-0.713292	-0.635946	-0.62684	0.0190219	-0.536974	-0.565319	-0.581586	-0.450152	-0.567315	-0.433257	-0.799151	-0.494831	-0.350292	-0.453401	-0.692308	-0.522091	0.0895743	0.00891581	0.194895	-0.776839	-0.118776	-0.0973462	-0.398099	0.0443506	-0.107384	-0.576678	0.0370797	-0.217714	-0.657445	-0.660479	-0.157495	-0.0664037	-0.18342	-0.392492	-0.536128	-0.0502672	0.387905	-0.229192	-0.0356823	-0.161043	0.187138	0.195037	0.0751037	-0.32749	0.00828759	-0.107386	-0.00638966	0.402181
-0.374815	-0.698517	-0.702901	-0.615615	-0.656071	0.00385064	-0.509997	-0.628794	-0.571652	-0.438462	-0.543555	-0.465954	-0.789251	-0.492467	-0.346334	-0.45338	-0.671754	-0.566374	0.0279931	-0.0243504	0.173865	-0.778912	-0.142945	-0.0910255	-0.364211	0.116637	-0.137358	-0.572383	0.00367765	-0.199316	-0.647759	-0.631239	-0.192086	-0.0432819	-0.123498	-0.399774	-0.568805	-0.0867231	0.370391	-0.262372	0.0374451	-0.146228	0.187523	0.283522	0.0623176	-0.326671	-0.00584165	-0.0929151	-0.0129496	0.430371
-0.369977	-0.700375	-0.703977	-0.615325	-0.673142	-0.0117458	-0.531261	-0.603327	-0.552521	-0.41349	-0.561146	-0.494958	-0.786976	-0.451301	-0.314426	-0.474551	-0.662438	-0.572903	-0.0384923	-0.0304078	0.141029	-0.786291	-0.15476	-0.118383	-0.333028	0.116882	-0.100517	-0.521927	-0.00759506	-0.203762	-0.613415	-0.611557	-0.141813	0.0392286	-0.0977704	-0.412787	-0.608548	-0.17351	0.442257	-0.247123	0.105809	-0.184168	0.188316	0.281389	0.0812673	-0.331612	0.0334633	-0.104409	-0.0275136	0.475342
-0.397739	-0.701485	-0.714961	-0.642746	-0.622597	-0.00192733	-0.493561	-0.569082	-0.529159	-0.416835	-0.563673	-0.594204	-0.792692	-0.477865	-0.318547	-0.498868	-0.698468	-0.566673	-0.104743	-0.0819714	0.0880817	-0.783162	-0.152099	-0.147112	-0.344218	0.0750494	-0.111454	-0.537542	-0.0460794	-0.169418	-0.555731	-0.595646	-0.209765	-0.0298512	-0.020963	-0.397334	-0.567366	-0.254592	0.433157	-0.25444	0.156676	-0.149855	0.157679	0.275595	0.0784338	-0.362847	-0.0158712	-0.14605	-0.0713484	0.54749
-0.422443	-0.706589	-0.715936	-0.625441	-0.607862	0.00576574	-0.522502	-0.522827	-0.534503	-0.430094	-0.576872	-0.585792	-0.794033	-0.511866	-0.347456	-0.490187	-0.740865	-0.522566	-0.141044	0.00359016	0.092702	-0.780848	-0.160376	-0.127235	-0.334052	0.00080352	-0.137355	-0.533447	-0.0611038	-0.170532	-0.529472	-0.61214	-0.286843	-0.0594227	0.0368746	-0.413433	-0.524318	-0.18642	0.479475	-0.271637	0.0942193	-0.140377	0.168385	0.15189	0.115226	-0.341078	-0.00637904	-0.173127	-0.086664	0.549065
-0.443188	-0.690898	-0.721973	-0.627245	-0.597425	0.0195034	-0.539963	-0.516213	-0.566562	-0.47522	-0.532033	-0.61329	-0.813964	-0.611578	-0.392907	-0.477481	-0.741503	-0.537535	-0.150662	0.0505864	0.0978719	-0.797249	-0.111098	-0.0784695	-0.327859	-0.0185751	-0.157143	-0.567864	-0.0519211	-0.160414	-0.52701	-0.605286	-0.391331	-0.11816	0.170321	-0.423318	-0.518664	-0.167543	0.405473	-0.291134	0.0255771	-0.0679508	0.156175	0.174325	0.100583	-0.376081	-0.00132774	-0.131917	-0.115964	0.5321
-0.445037	-0.673189	-0.731925	-0.636567	-0.587242	0.0178988	-0.54692	-0.508527	-0.634976	-0.505368	-0.528684	-0.544901	-0.811866	-0.659867	-0.44543	-0.455999	-0.775086	-0.549135	-0.158814	0.0491841	0.1263	-0.790798	-0.121548	-0.0355438	-0.322454	-0.0306339	-0.20049	-0.572503	-0.0359583	-0.13322	-0.525239	-0.617991	-0.430711	-0.14221	0.138192	-0.459564	-0.590664	-0.0910038	0.477896	-0.310364	-0.0496414	-0.0981728	0.158504	0.142192	0.0792882	-0.410201	0.0226073	-0.0539476	-0.127166	0.577748
-0.473202	-0.647025	-0.745508	-0.649879	-0.574475	0.031132	-0.555626	-0.463074	-0.669417	-0.522685	-0.525854	-0.578011	-0.814941	-0.67846	-0.471541	-0.439173	-0.756959	-0.545543	-0.174668	0.00997006	0.129236	-0.806773	-0.138142	-0.0190177	-0.279023	0.0273312	-0.18314	-0.548968	-0.0459265	-0.140444	-0.499554	-0.568486	-0.411694	-0.152451	0.137751	-0.409438	-0.641239	-0.142939	0.495119	-0.307907	-0.0448924	-0.125689	0.167629	0.187801	0.0962587	-0.473303	0.0333459	0.0334429	-0.139975	0.58138
-0.501481	-0.649034	-0.753711	-0.625226	-0.554552	0.0358115	-0.494034	-0.441569	-0.651818	-0.518702	-0.526146	-0.546674	-0.798594	-0.66396	-0.482556	-0.396954	-0.77507	-0.581133	-0.207032	-0.0260775	0.101501	-0.799751	-0.177654	-0.0205962	-0.228821	0.0779876	-0.216535	-0.532656	-0.0159035	-0.14769	-0.462097	-0.557185	-0.401825	-0.136447	0.108604	-0.352483	-0.604653	-0.0879068	0.53603	-0.321213	-0.080937	-0.147491	0.161074	0.169287	0.144717	-0.493297	-0.00020872	0.0637089	-0.148959	0.598697
-0.533372	-0.657363	-0.738706	-0.627248	-0.539763	0.0333909	-0.475072	-0.450723	-0.593132	-0.510583	-0.511378	-0.559165	-0.787032	-0.631001	-0.44425	-0.311463	-0.740758	-0.584105	-0.234716	-0.0684529	0.0874422	-0.827589	-0.212027	-0.0262971	-0.173884	0.123503	-0.253495	-0.488209	-0.020233	-0.173871	-0.407921	-0.522723	-0.38595	-0.0435731	0.148011	-0.276296	-0.59849	-0.159659	0.548973	-0.307417	-0.083096	-0.132849	0.213598	0.218282	0.153916	-0.430342	-0.0605391	0.09288	-0.114702	0.512131
-0.545596	-0.669442	-0.722055	-0.642149	-0.560155	0.0292458	-0.478892	-0.491762	-0.548298	-0.486516	-0.502806	-0.527152	-0.785829	-0.63665	-0.433152	-0.277988	-0.763226	-0.548643	-0.234565	-0.0321741	0.0951443	-0.849732	-0.173427	-0.0544037	-0.172392	0.0444442	-0.290222	-0.465229	-0.0248633	-0.181028	-0.370877	-0.552307	-0.366485	-0.00848568	0.184472	-0.246303	-0.56905	-0.123164	0.559236	-0.311449	-0.0807135	-0.141772	0.199094	0.164933	0.120874	-0.399207	-0.103978	0.0850721	-0.110706	0.458861
-0.54476	-0.677797	-0.703877	-0.680681	-0.548737	0.0581298	-0.501897	-0.544661	-0.515289	-0.493428	-0.492962	-0.494706	-0.795121	-0.634682	-0.468793	-0.26361	-0.776067	-0.498726	-0.2141	-0.0620254	0.116846	-0.858902	-0.236655	-0.0492807	-0.215138	-0.0574544	-0.285207	-0.454152	-0.069856	-0.157254	-0.399974	-0.531968	-0.313681	-0.0553298	0.162544	-0.172542	-0.604243	-0.115574	0.615012	-0.319404	-0.109675	-0.131624	0.179056	0.189549	0.123031	-0.346365	-0.158693	0.0329956	-0.146043	0.374783
-0.509444	-0.674203	-0.700409	-0.706478	-0.598485	0.0747073	-0.577381	-0.559254	-0.505195	-0.476769	-0.478749	-0.430482	-0.806915	-0.648011	-0.502397	-0.268029	-0.819349	-0.462289	-0.162886	0.115679	0.104514	-0.846575	-0.222554	-0.0299726	-0.206744	-0.133125	-0.258508	-0.458906	-0.0883762	-0.127781	-0.45457	-0.530207	-0.266279	-0.0501308	0.168041	-0.194213	-0.604611	-0.133377	0.556554	-0.318185	-0.11982	-0.0846796	0.102932	0.166301	0.162619	-0.338933	-0.148028	0.0387098	-0.160691	0.380665
-0.47014	-0.667411	-0.70869	-0.7124	-0.582315	0.0776373	-0.545901	-0.498738	-0.496184	-0.512606	-0.458904	-0.402016	-0.810793	-0.634407	-0.516966	-0.273703	-0.856365	-0.516461	-0.121383	0.0365337	0.0989498	-0.828934	-0.329168	-0.0245928	-0.186538	-0.113834	-0.245136	-0.492036	-0.118057	-0.0490117	-0.456508	-0.54808	-0.271424	-0.0997459	0.109606	-0.18821	-0.688115	-0.108956	0.510719	-0.289782	-0.125295	-0.0322906	0.0745222	0.196489	0.175132	-0.331116	-0.199082	0.0792139	-0.13273	0.397009
-0.437668	-0.648287	-0.70869	-0.731313	-0.590763	0.0796461	-0.534719	-0.501582	-0.509044	-0.505107	-0.46531	-0.433462	-0.816441	-0.62112	-0.517332	-0.274761	-0.854959	-0.423312	-0.114315	0.0148039	0.115819	-0.818576	-0.287615	0.00331372	-0.0975005	-0.0349297	-0.256963	-0.485551	-0.128595	-0.0474633	-0.426838	-0.580141	-0.325879	-0.0787733	0.12793	-0.234816	-0.734527	-0.134979	0.423461	-0.28043	-0.124948	-0.0432177	0.0809106	0.183692	0.23133	-0.29225	-0.165822	0.160888	-0.10016	0.395341
-0.438491	-0.648943	-0.705486	-0.711775	-0.608586	0.082753	-0.494786	-0.481669	-0.51024	-0.523687	-0.472092	-0.494859	-0.853995	-0.636795	-0.514745	-0.275579	-0.816662	-0.386683	-0.156159	-0.130135	0.149249	-0.840422	-0.289536	0.0550746	-0.0255184	-0.0180281	-0.241665	-0.529125	-0.15926	-0.0743403	-0.416955	-0.613965	-0.313611	-0.0795114	0.135812	-0.267283	-0.741716	-0.0536295	0.368848	-0.260516	-0.210496	-0.0794969	0.123935	0.182549	0.227307	-0.228949	-0.184167	0.165897	-0.121442	0.316544
-0.46793	-0.651962	-0.69893	-0.752696	-0.630207	0.0896661	-0.493057	-0.519614	-0.532333	-0.496637	-0.486844	-0.517716	-0.872306	-0.627369	-0.534227	-0.255393	-0.741125	-0.336544	-0.228624	-0.135947	0.151653	-0.854672	-0.192853	0.08892	-0.0454735	0.0679125	-0.24755	-0.514383	-0.17386	-0.112866	-0.413167	-0.626105	-0.277252	-0.0360064	0.22621	-0.286735	-0.766622	-0.102546	0.380292	-0.291182	-0.266656	-0.121942	0.134744	0.126127	0.239627	-0.169306	-0.129388	0.162362	-0.152392	0.292467
-0.477118	-0.663323	-0.687231	-0.759729	-0.657404	0.0973538	-0.466662	-0.528837	-0.541837	-0.51186	-0.460196	-0.500646	-0.881964	-0.623175	-0.535208	-0.219572	-0.718933	-0.368631	-0.231598	-0.191545	0.10795	-0.856379	-0.170381	0.08251	-0.0809998	-0.0174416	-0.306071	-0.549895	-0.147056	-0.0976272	-0.398266	-0.638044	-0.304933	-0.129558	0.238019	-0.291304	-0.697826	-0.0524069	0.350562	-0.315805	-0.286543	-0.1203	0.101512	0.121391	0.231142	-0.171165	-0.111404	0.140792	-0.159348	0.287968
-0.48555	-0.65129	-0.687315	-0.764065	-0.651751	0.110732	-0.48921	-0.518403	-0.526033	-0.513957	-0.469793	-0.490396	-0.858812	-0.593409	-0.543818	-0.20701	-0.718916	-0.418128	-0.253128	-0.110834	0.0847726	-0.821249	-0.192306	0.0921666	-0.126603	-0.0336553	-0.361081	-0.532946	-0.119675	-0.100331	-0.339302	-0.630429	-0.286938	-0.218622	0.188144	-0.268536	-0.699196	-0.0561502	0.490362	-0.357361	-0.265716	-0.10097	0.0917915	0.08484	0.229656	-0.210555	-0.0734956	0.176015	-0.169992	0.380357
-0.503748	-0.639969	-0.689178	-0.738141	-0.686502	0.128524	-0.472566	-0.525955	-0.508347	-0.532058	-0.469882	-0.497495	-0.856986	-0.591444	-0.525128	-0.199758	-0.717446	-0.418049	-0.244612	-0.199714	0.0789892	-0.802732	-0.183521	0.118035	-0.0664343	-0.166271	-0.392703	-0.553544	-0.0881828	-0.107652	-0.27692	-0.601245	-0.349836	-0.192536	0.141136	-0.3405	-0.683105	-0.0636323	0.488129	-0.371414	-0.251295	-0.0807221	0.106382	0.169851	0.19037	-0.234732	-0.0562013	0.172093	-0.15507	0.442289
-0.539093	-0.623711	-0.71033	-0.75119	-0.693446	0.109703	-0.530954	-0.464907	-0.512355	-0.519248	-0.503465	-0.528493	-0.865353	-0.593564	-0.515571	-0.181432	-0.682386	-0.424662	-0.257842	-0.183564	0.0567611	-0.797946	-0.11707	0.170222	-0.0271893	-0.0854207	-0.345284	-0.577451	-0.0967732	-0.155624	-0.201838	-0.568175	-0.336513	-0.00269575	0.181363	-0.442577	-0.678871	-0.197868	0.549054	-0.350328	-0.243616	-0.0534752	0.148116	0.185761	0.165877	-0.223345	-0.0023301	0.227992	-0.102395	0.421843
-0.591473	-0.628057	-0.714509	-0.754791	-0.692472	0.114339	-0.475498	-0.457824	-0.541932	-0.504904	-0.500661	-0.569701	-0.867935	-0.592528	-0.480472	-0.193218	-0.701211	-0.357594	-0.214004	-0.25445	0.0219181	-0.819609	0.0211194	0.171776	-0.0205318	-0.0938953	-0.323294	-0.607759	-0.125196	-0.101582	-0.192012	-0.582092	-0.406142	-0.0472031	0.381917	-0.491305	-0.615414	-0.287127	0.430355	-0.361057	-0.25235	-0.00684085	0.119945	0.265418	0.197078	-0.266815	-0.0725605	0.232416	-0.0675435	0.445179
-0.582311	-0.646465	-0.726434	-0.775336	-0.67677	0.12595	-0.468154	-0.439668	-0.571791	-0.477829	-0.50591	-0.611908	-0.86098	-0.593981	-0.455722	-0.237332	-0.735495	-0.288754	-0.152797	-0.178096	0.00610325	-0.811838	0.0908191	0.176437	-0.0566213	-0.0353496	-0.282431	-0.63926	-0.120997	-0.0890569	-0.187212	-0.60196	-0.383421	-0.0901476	0.456993	-0.512258	-0.567452	-0.280038	0.316283	-0.355539	-0.244801	-0.0236783	0.12603	0.309108	0.142278	-0.263799	-0.0923754	0.258309	-0.0636437	0.467931
-0.597245	-0.670386	-0.726207	-0.770798	-0.650914	0.155495	-0.424317	-0.488531	-0.568218	-0.442233	-0.498961	-0.605419	-0.818631	-0.562764	-0.4125	-0.253959	-0.799956	-0.278131	-0.121917	-0.14324	0.0501401	-0.815796	0.0380523	0.108155	-0.070295	-0.00970327	-0.336108	-0.6314	-0.155837	-0.0391982	-0.228821	-0.636641	-0.391824	-0.206716	0.446412	-0.478175	-0.583327	-0.216329	0.275778	-0.370028	-0.252192	-0.0255907	0.104055	0.295082	0.0946804	-0.303533	-0.16868	0.246733	-0.103726	0.543943
-0.568519	-0.676025	-0.738085	-0.781713	-0.593894	0.145943	-0.427888	-0.480903	-0.584229	-0.442209	-0.48187	-0.585954	-0.793407	-0.571862	-0.410972	-0.254021	-0.836005	-0.311559	-0.0705587	-0.196037	0.0820474	-0.803988	-0.040866	0.0883299	-0.130214	0.0595202	-0.332265	-0.595334	-0.145143	-0.0161003	-0.231513	-0.639286	-0.388239	-0.200027	0.392997	-0.511383	-0.588573	-0.139075	0.271421	-0.401487	-0.247581	-0.104296	0.125178	0.193984	0.0682098	-0.30552	-0.124427	0.22064	-0.109654	0.521331
-0.575822	-0.662733	-0.733735	-0.775987	-0.575619	0.147282	-0.45861	-0.519302	-0.580786	-0.430711	-0.480383	-0.573986	-0.800703	-0.57779	-0.426556	-0.202643	-0.866921	-0.395223	-0.100317	-0.153073	0.0880414	-0.791738	-0.0487675	0.0446236	-0.181793	0.0753488	-0.334324	-0.541972	-0.217314	-0.0169206	-0.262892	-0.660923	-0.364575	-0.247907	0.373305	-0.494536	-0.543062	-0.219298	0.269291	-0.440002	-0.273218	-0.142699	0.0721142	0.157257	0.101997	-0.338509	-0.150106	0.188851	-0.131053	0.509173
-0.571294	-0.662211	-0.718094	-0.773323	-0.591679	0.129311	-0.479459	-0.554478	-0.582011	-0.434205	-0.470785	-0.57575	-0.827021	-0.600783	-0.441864	-0.192307	-0.851844	-0.419824	-0.134684	-0.14806	0.0817168	-0.795228	-0.052847	0.0667173	-0.262715	0.0200635	-0.294813	-0.53477	-0.25138	-0.0107221	-0.242367	-0.652303	-0.338186	-0.260941	0.409069	-0.507633	-0.516035	-0.210004	0.192036	-0.437123	-0.257178	-0.222269	0.0796468	0.155899	0.056353	-0.356493	-0.157743	0.156622	-0.110896	0.512954
-0.569107	-0.680472	-0.713901	-0.781896	-0.604636	0.146543	-0.499062	-0.612114	-0.55672	-0.434983	-0.481703	-0.570582	-0.83348	-0.564454	-0.455769	-0.194424	-0.829018	-0.46149	-0.208647	-0.0299983	0.066651	-0.792146	-0.0607637	0.0248944	-0.310384	0.0425983	-0.242105	-0.53176	-0.27871	-0.0335835	-0.233967	-0.637981	-0.379338	-0.184705	0.374334	-0.491432	-0.490954	-0.249707	0.199148	-0.411833	-0.205401	-0.224952	0.0857128	0.227476	0.0642322	-0.325818	-0.195201	0.140133	-0.0947564	0.54916
-0.519261	-0.699633	-0.705666	-0.787518	-0.614961	0.107973	-0.4582	-0.607717	-0.555828	-0.470815	-0.486389	-0.554359	-0.840874	-0.540705	-0.473062	-0.232381	-0.789535	-0.475525	-0.214629	-0.0633754	0.10266	-0.783899	-0.112867	0.0479884	-0.353337	-0.041317	-0.205876	-0.618152	-0.263569	-0.0351864	-0.234266	-0.612743	-0.405782	-0.101689	0.34694	-0.535405	-0.46491	-0.176986	0.187972	-0.380282	-0.20758	-0.18384	0.107046	0.182279	0.0277842	-0.29761	-0.192284	0.133106	-0.0720847	0.554672
-0.45774	-0.693113	-0.710032	-0.786939	-0.558718	0.0698928	-0.458979	-0.578326	-0.538499	-0.489644	-0.486586	-0.522294	-0.839039	-0.516276	-0.492611	-0.278075	-0.800163	-0.483752	-0.192748	-0.0375991	0.0908354	-0.760154	-0.139103	0.0356058	-0.354172	-0.00147988	-0.174765	-0.60261	-0.290848	-0.0575959	-0.254165	-0.604075	-0.466934	-0.0330602	0.254661	-0.592625	-0.423481	-0.252839	0.316327	-0.340147	-0.205588	-0.122275	0.131265	0.119948	0.113161	-0.260535	-0.192348	0.173836	-0.0618922	0.507798
-0.428233	-0.674301	-0.700092	-0.77349	-0.568337	0.0467052	-0.417577	-0.570418	-0.525022	-0.510804	-0.449401	-0.47846	-0.849382	-0.533939	-0.453567	-0.274548	-0.813799	-0.421152	-0.184409	-0.114232	0.0949513	-0.721016	-0.201953	0.0543786	-0.36944	-0.0708588	-0.196377	-0.669488	-0.342711	-0.0631622	-0.243257	-0.610236	-0.420021	-0.0494485	0.164083	-0.608123	-0.501624	-0.190186	0.225598	-0.328244	-0.258379	-0.170911	0.0983812	0.0626172	0.053176	-0.23407	-0.161793	0.168037	-0.0674666	0.394785
-0.410723	-0.66405	-0.697013	-0.779132	-0.550396	0.0212524	-0.398013	-0.571494	-0.489797	-0.512207	-0.420257	-0.388541	-0.847532	-0.566767	-0.391451	-0.270346	-0.860246	-0.361745	-0.184899	-0.115935	0.033503	-0.701869	-0.273385	-0.0218996	-0.397732	0.0271881	-0.187765	-0.62954	-0.362684	-0.0524147	-0.245631	-0.654716	-0.345311	-0.224973	0.115266	-0.519993	-0.5645	-0.215245	0.298111	-0.316647	-0.24134	-0.22274	0.086488	0.0475823	0.117695	-0.27285	-0.154573	0.124096	-0.130715	0.374106
-0.392086	-0.649422	-0.691274	-0.80053	-0.57301	0.0123416	-0.346418	-0.608707	-0.496266	-0.524871	-0.364531	-0.371362	-0.851875	-0.609568	-0.299789	-0.210428	-0.866221	-0.317655	-0.210712	-0.115515	0.0241522	-0.68283	-0.278177	-0.0930267	-0.452703	0.0534973	-0.212644	-0.673599	-0.381478	-0.0611547	-0.186619	-0.653552	-0.278739	-0.241372	0.0260209	-0.45367	-0.721228	-0.218274	0.140981	-0.314677	-0.230871	-0.271646	0.0681511	0.0834928	0.0611422	-0.247476	-0.093137	0.0271977	-0.172399	0.36661
-0.360574	-0.621337	-0.687486	-0.820421	-0.601211	-0.0214758	-0.262667	-0.600379	-0.49281	-0.53232	-0.330021	-0.395503	-0.871543	-0.666809	-0.257474	-0.208978	-0.845867	-0.249773	-0.231222	-0.171585	-0.0143759	-0.677379	-0.212739	-0.173887	-0.382457	0.0670076	-0.246515	-0.669017	-0.393131	-0.0869012	-0.213946	-0.618036	-0.24043	-0.169814	-0.0465514	-0.435465	-0.72534	-0.378009	0.0873812	-0.285974	-0.206169	-0.225727	0.0825142	0.0986717	0.0769123	-0.215419	-0.01741	-0.0211358	-0.184427	0.416152
-0.361354	-0.593333	-0.699606	-0.807972	-0.657946	-0.0582448	-0.197454	-0.577605	-0.495188	-0.583507	-0.221022	-0.411661	-0.871179	-0.716616	-0.178259	-0.219263	-0.784083	-0.16005	-0.272759	-0.196544	-0.0399744	-0.652436	-0.109052	-0.191995	-0.289508	0.113232	-0.26095	-0.737438	-0.4469	-0.153517	-0.180414	-0.529903	-0.219438	0.031747	-0.0370045	-0.476448	-0.691472	-0.401691	0.0394629	-0.277836	-0.174669	-0.208326	0.133633	-0.0305002	-0.00123506	-0.102134	0.0590758	-0.0323925	-0.154784	0.373699
-0.355058	-0.575573	-0.712139	-0.804017	-0.704054	-0.0839409	-0.130076	-0.509546	-0.499535	-0.660803	-0.137879	-0.469548	-0.895713	-0.757748	-0.148862	-0.275349	-0.708023	-0.0843414	-0.295226	-0.244421	-0.0950463	-0.626833	-0.0497346	-0.227301	-0.203666	0.152057	-0.244437	-0.760631	-0.451767	-0.165512	-0.162394	-0.495492	-0.135044	-0.0798299	-0.0393185	-0.397823	-0.563737	-0.426518	0.0274165	-0.349365	-0.140298	-0.201503	0.167002	-0.0947295	0.00995169	-0.0861787	0.0430691	-0.0674375	-0.154487	0.271515
-0.35947	-0.561321	-0.740131	-0.794988	-0.727882	-0.115482	-0.12056	-0.480064	-0.497539	-0.749464	-0.0166043	-0.466103	-0.907329	-0.815404	-0.0927796	-0.27667	-0.626927	-0.102375	-0.311443	-0.172205	-0.0868944	-0.61474	-0.00334663	-0.224818	-0.253149	0.257622	-0.205394	-0.841264	-0.411103	-0.192194	-0.0946551	-0.488127	-0.0722092	-0.139428	-0.0232073	-0.368254	-0.506587	-0.384895	0.0567581	-0.414892	-0.076366	-0.243812	0.209283	-0.16848	-0.0225225	-0.101024	-0.0116469	-0.086931	-0.220333	0.247092
-0.330981	-0.517839	-0.762722	-0.805506	-0.709507	-0.147041	-0.0951775	-0.449142	-0.483181	-0.793847	0.0423591	-0.52229	-0.929786	-0.84763	-0.082493	-0.203801	-0.589358	-0.10457	-0.31032	-0.19599	-0.0903434	-0.590451	-0.00058122	-0.238044	-0.271801	0.232144	-0.246328	-0.837224	-0.3917	-0.201936	-0.0517787	-0.479068	-0.0764465	-0.234871	-0.090615	-0.328682	-0.491977	-0.413434	-0.099115	-0.490798	-0.0609037	-0.274218	0.188689	-0.101023	-0.00253159	-0.212523	-0.0921781	-0.150207	-0.314578	0.229769
-0.295459	-0.478663	-0.785506	-0.787843	-0.730718	-0.193701	-0.0470664	-0.468637	-0.476016	-0.842122	0.123329	-0.510967	-0.95045	-0.875599	-0.0617378	-0.120721	-0.568008	-0.107768	-0.332081	-0.240604	-0.0997034	-0.536896	0.0480492	-0.237847	-0.280104	0.28182	-0.289289	-0.933796	-0.35439	-0.226614	-0.00535042	-0.453471	-0.0841722	-0.194351	-0.0159041	-0.358155	-0.410238	-0.431318	-0.135702	-0.515705	-0.0787408	-0.362994	0.125188	-0.0799477	-0.119052	-0.291429	-0.103071	-0.200814	-0.374342	0.285186
-0.24226	-0.436853	-0.793567	-0.732862	-0.715599	-0.253443	-0.0561405	-0.428945	-0.450447	-0.829915	0.172035	-0.536196	-0.967132	-0.84202	-0.0337911	-0.0532885	-0.518272	-0.105551	-0.352989	-0.213107	-0.143453	-0.469097	0.0880294	-0.237909	-0.221072	0.292805	-0.304919	-0.918908	-0.35212	-0.241484	0.0474992	-0.393681	-0.133935	-0.0595425	0.0620892	-0.442893	-0.264733	-0.396215	-0.133385	-0.4928	-0.134055	-0.322461	0.143419	-0.0335586	-0.180173	-0.305078	-0.0865257	-0.224015	-0.325376	0.259323
-0.213168	-0.396283	-0.799837	-0.704289	-0.705922	-0.290131	-0.0946027	-0.39911	-0.436575	-0.837202	0.225902	-0.486536	-0.978415	-0.830702	-0.00923032	0.00996302	-0.456074	-0.116596	-0.383128	-0.110153	-0.183116	-0.41987	0.13888	-0.259805	-0.207628	0.391229	-0.306747	-0.927382	-0.316936	-0.222013	0.0765581	-0.355253	-0.180229	-0.073576	0.0869233	-0.439863	-0.133486	-0.433443	-0.0749859	-0.474972	-0.129528	-0.255562	0.134804	-0.12584	-0.217631	-0.305615	-0.0926495	-0.166954	-0.296946	0.225504
-0.23435	-0.350839	-0.813194	-0.652813	-0.733577	-0.320958	-0.116732	-0.358305	-0.402887	-0.824923	0.271573	-0.405824	-0.979314	-0.821745	0.0267535	0.0876352	-0.351448	-0.143367	-0.417929	0.00203717	-0.20262	-0.395482	0.184378	-0.265207	-0.226504	0.264533	-0.338031	-0.873532	-0.329985	-0.253179	0.0376913	-0.314561	-0.179839	0.00957387	0.0726538	-0.510199	-0.0630832	-0.332571	-0.0706104	-0.461312	-0.0859409	-0.241223	0.18611	-0.0872335	-0.140236	-0.277527	-0.0596793	-0.0788788	-0.280344	0.186926
-0.248125	-0.317513	-0.833071	-0.669214	-0.76719	-0.311311	-0.0781247	-0.406421	-0.38776	-0.87025	0.319182	-0.349299	-0.993737	-0.825274	0.0372809	0.203109	-0.297406	-0.122201	-0.493061	-0.0114468	-0.238715	-0.381642	0.228593	-0.336479	-0.259836	0.292071	-0.41434	-0.85586	-0.34811	-0.225653	-0.0413306	-0.284773	-0.238431	-0.20497	0.134315	-0.441134	-0.067086	-0.312283	-0.133456	-0.50659	0.0197557	-0.256032	0.103571	-0.0218112	-0.104175	-0.315765	-0.103286	-0.00137453	-0.314174	0.215131
-0.327694	-0.2752	-0.85961	-0.673615	-0.789584	-0.288203	-0.0535045	-0.419478	-0.370959	-0.907433	0.414473	-0.344707	-1.00147	-0.834775	0.0552588	0.266219	-0.212113	-0.0537213	-0.552102	-0.0610152	-0.272943	-0.35106	0.337281	-0.301945	-0.266633	0.249587	-0.443674	-0.827346	-0.340258	-0.221505	-0.095997	-0.256517	-0.147789	-0.139958	0.277055	-0.446878	-0.0788187	-0.302604	-0.0997241	-0.480099	0.0338038	-0.251102	0.133989	0.226457	-0.0877206	-0.296575	-0.131664	0.0215674	-0.317792	0.280348
-0.34015	-0.234703	-0.894631	-0.680626	-0.751941	-0.258797	-0.0705279	-0.37739	-0.335714	-0.942739	0.511163	-0.338652	-1.01018	-0.830848	0.0661178	0.323251	-0.179607	0.039595	-0.588187	0.00282173	-0.295412	-0.350254	0.448268	-0.325743	-0.176593	0.401347	-0.451247	-0.80787	-0.29593	-0.201446	-0.135145	-0.258101	-0.114862	-0.0648959	0.378446	-0.42928	-0.0882734	-0.272434	-0.145891	-0.452881	0.0673214	-0.210107	0.109371	0.282745	-0.0626618	-0.281847	-0.158011	0.0497648	-0.349764	0.370244
-0.393727	-0.197872	-0.917712	-0.681932	-0.739407	-0.235642	-0.108636	-0.260017	-0.318221	-0.971422	0.632364	-0.33078	-1.00672	-0.849365	0.080269	0.361084	-0.126171	0.1106	-0.611701	0.0438644	-0.321002	-0.328298	0.542983	-0.310779	-0.0768838	0.419744	-0.451507	-0.777786	-0.229789	-0.191655	-0.145816	-0.287871	0.0545378	0.0179711	0.494516	-0.318337	-0.0876876	-0.254979	-0.189906	-0.413442	0.0292945	-0.233066	0.200213	0.323416	-0.0848666	-0.258487	-0.154393	0.0283283	-0.415263	0.380009
-0.350421	-0.182409	-0.929425	-0.641881	-0.736916	-0.251615	-0.118573	-0.193552	-0.275676	-0.955581	0.727775	-0.347771	-0.991856	-0.81435	0.148279	0.460026	-0.121886	0.122669	-0.649689	0.0735561	-0.360266	-0.307003	0.583688	-0.350759	-0.0244897	0.439881	-0.473287	-0.733576	-0.250826	-0.162508	-0.132736	-0.317133	0.00559917	0.0300648	0.491229	-0.29617	-0.0768841	-0.18908	-0.268895	-0.397521	0.0104794	-0.296751	0.161876	0.294101	-0.0939844	-0.263099	-0.0810159	0.0102075	-0.426587	0.409939
-0.373348	-0.170617	-0.929506	-0.593243	-0.741456	-0.241145	-0.0856284	-0.208181	-0.238102	-0.952423	0.870929	-0.346105	-0.988286	-0.803035	0.191583	0.561575	-0.116155	0.100024	-0.703485	0.0717488	-0.400661	-0.263449	0.593282	-0.262479	-0.0142628	0.488609	-0.484832	-0.664377	-0.247563	-0.0567145	-0.0704398	-0.315674	-0.0288911	-0.041271	0.481035	-0.214998	-0.0417929	-0.200484	-0.297866	-0.355687	-0.0366881	-0.200889	0.0998381	0.389144	-0.167242	-0.298146	-0.0767236	0.0195407	-0.437718	0.412175
-0.314974	-0.15776	-0.939743	-0.503387	-0.735501	-0.272637	-0.0626249	-0.18054	-0.206549	-0.944759	0.995041	-0.357371	-0.979613	-0.783915	0.201558	0.657558	-0.115568	0.0476165	-0.714803	0.116289	-0.424612	-0.247335	0.622345	-0.172244	-0.0320598	0.591887	-0.460791	-0.636335	-0.187301	-0.0209513	-0.00523853	-0.319479	-0.0859623	-0.0910115	0.351354	-0.225138	-0.0275828	-0.218042	-0.388833	-0.337778	-0.0640554	-0.181394	-0.0561215	0.37673	-0.173398	-0.310348	-0.00780125	0.0542336	-0.441192	0.446016
-0.358583	-0.137085	-0.957225	-0.435094	-0.773624	-0.249737	-0.044406	-0.21279	-0.21726	-0.961361	1.13266	-0.303611	-0.994434	-0.782156	0.148106	0.702592	-0.11366	0.0165475	-0.710972	0.182244	-0.383933	-0.253186	0.630686	-0.119178	0.00908897	0.64426	-0.432609	-0.647969	-0.0921889	0.0144684	-0.03412	-0.322733	-0.0265581	-0.275495	0.3708	-0.211677	0.0479394	-0.183193	-0.418844	-0.357381	-0.0622699	-0.117217	-0.145311	0.420979	-0.216117	-0.369436	-0.00453469	0.086045	-0.472791	0.43746
-0.328556	-0.11848	-0.989343	-0.379501	-0.832838	-0.264126	-0.10739	-0.225101	-0.240855	-0.966393	1.18461	-0.249658	-1.01561	-0.783349	0.111808	0.726174	-0.0516605	0.0402026	-0.698002	0.217217	-0.372635	-0.242777	0.571302	-0.18145	0.0851524	0.631722	-0.388116	-0.634314	0.00822836	-0.0398575	-0.1199	-0.269115	-0.0260295	-0.314473	0.407187	-0.22791	0.0335171	-0.153641	-0.476947	-0.415483	-0.0287393	-0.179358	-0.154317	0.337253	-0.230507	-0.443547	-0.0456779	0.110558	-0.511618	0.446649
-0.344287	-0.0917108	-1.00095	-0.330949	-0.886354	-0.264881	-0.150416	-0.3226	-0.255483	-0.960482	1.25673	-0.151049	-1.04689	-0.778034	0.0760065	0.717608	0.0269489	0.0863168	-0.707989	0.309778	-0.347827	-0.239088	0.460663	-0.225563	0.189543	0.576432	-0.364685	-0.613238	-0.0001769	-0.0475246	-0.200909	-0.166509	0.00421023	-0.221632	0.453517	-0.258383	0.0639344	-0.0510619	-0.543316	-0.447219	0.00796535	-0.153167	-0.0906644	0.40654	-0.343439	-0.490616	-0.0920402	0.156778	-0.496717	0.409839
-0.306679	-0.0716442	-1.00628	-0.283835	-0.918763	-0.273405	-0.183622	-0.343145	-0.250412	-0.975505	1.29812	-0.0938012	-1.06198	-0.789847	0.0343658	0.733303	0.129335	0.154174	-0.75144	0.344635	-0.372539	-0.223844	0.356082	-0.252628	0.242073	0.575564	-0.365291	-0.551617	0.0310534	-0.0494288	-0.220852	-0.132135	0.067579	-0.141061	0.454583	-0.237123	-0.0183894	0.00231844	-0.615931	-0.470035	0.053142	-0.198476	-0.049283	0.462663	-0.415501	-0.499118	-0.0953492	0.210726	-0.512025	0.414308
-0.295865	-0.0496402	-0.994219	-0.252661	-0.939019	-0.285872	-0.18198	-0.333305	-0.213962	-0.975277	1.3723	-0.00434083	-1.04962	-0.756831	0.00246662	0.780719	0.160572	0.220209	-0.808069	0.409524	-0.354475	-0.210614	0.286521	-0.2111	0.132451	0.56528	-0.386165	-0.459818	0.0668948	0.0152393	-0.25566	-0.161538	0.104729	-0.260449	0.525485	-0.166894	-0.00442768	0.0784313	-0.598331	-0.456843	0.0945621	-0.204816	-0.0510337	0.635508	-0.483849	-0.509287	0.0361182	0.273431	-0.50517	0.527624
-0.32134	-0.0369806	-0.990462	-0.252479	-0.942445	-0.299868	-0.210155	-0.281321	-0.16817	-0.995545	1.42909	0.0886435	-1.03451	-0.72915	-0.0382443	0.816557	0.185681	0.226019	-0.839624	0.481425	-0.382859	-0.172107	0.25486	-0.131101	0.0716117	0.476175	-0.39999	-0.359988	0.122499	0.0871028	-0.285122	-0.208799	0.100168	-0.364007	0.590888	-0.107241	-0.0553994	0.118346	-0.510525	-0.445154	0.0797212	-0.220398	-0.138809	0.750357	-0.431336	-0.53303	0.163849	0.299622	-0.541003	0.605536
-0.35229	-0.0167336	-0.994873	-0.223648	-0.956208	-0.333702	-0.231761	-0.268138	-0.143458	-0.996917	1.49174	0.18009	-1.0396	-0.697608	-0.0617559	0.869201	0.225063	0.147475	-0.841331	0.618278	-0.392734	-0.119804	0.145404	-0.0330015	0.0438163	0.470138	-0.394278	-0.312793	0.236117	0.157345	-0.318483	-0.130288	-0.0401311	-0.214355	0.696252	-0.164462	-0.0138377	0.157313	-0.488323	-0.451288	0.049289	-0.204571	-0.164356	0.984786	-0.442093	-0.493254	0.247268	0.338976	-0.563327	0.586267
-0.425911	0.028803	-0.988419	-0.166221	-0.95797	-0.362163	-0.237159	-0.334747	-0.118856	-1.0129	1.54288	0.261912	-1.04723	-0.707986	-0.0647568	0.893993	0.290109	0.0909385	-0.801161	0.71321	-0.404411	-0.0684617	0.1035	0.00546872	0.0821837	0.438777	-0.37756	-0.271745	0.286935	0.17064	-0.301066	-0.0530373	-0.0279483	-0.104682	0.811807	-0.158603	-0.00248526	0.173353	-0.50213	-0.484238	-0.0195539	-0.208065	-0.202351	1.07687	-0.450416	-0.434795	0.273424	0.282901	-0.623028	0.3909
-0.541099	0.099615	-1.0176	-0.0783645	-0.949731	-0.37688	-0.291454	-0.378412	-0.132704	-1.01979	1.50624	0.363382	-1.06197	-0.709235	-0.0697686	0.981848	0.386364	0.091638	-0.783445	0.848295	-0.421382	-0.00378663	0.0880383	-0.0682421	0.139036	0.477081	-0.395049	-0.235243	0.414939	0.108896	-0.291271	0.0427033	0.0261506	-0.0312382	1.01546	-0.130243	0.168463	0.219502	-0.552461	-0.554179	-0.0303116	-0.227762	-0.0823597	1.18494	-0.509714	-0.421964	0.337785	0.234676	-0.694688	0.2287
-0.638043	0.151066	-1.02586	-0.0551734	-0.970104	-0.3925	-0.331269	-0.373414	-0.104106	-1.02962	1.50142	0.446275	-1.0572	-0.739912	-0.085151	1.01366	0.47048	0.158	-0.834505	0.809087	-0.4055	0.0895938	0.145511	-0.117505	0.245388	0.391548	-0.418728	-0.211242	0.419435	0.0376923	-0.287776	0.0999082	0.180825	-0.154787	1.11108	0.0343134	0.214774	0.307199	-0.641155	-0.570945	-0.0551882	-0.213278	0.0594106	1.15349	-0.571698	-0.444686	0.384521	0.156132	-0.752773	0.0799142
-0.7497	0.184831	-1.05436	-0.0526364	-0.996939	-0.40193	-0.396718	-0.324665	-0.103939	-1.02382	1.45708	0.426188	-1.06523	-0.771355	-0.144407	1.02234	0.597811	0.160053	-0.921656	0.846395	-0.42136	0.215482	0.265846	-0.176684	0.421334	0.23378	-0.42119	-0.209094	0.432613	-0.0423584	-0.283557	0.169788	0.24393	-0.0957183	1.24626	0.0447931	0.287088	0.293913	-0.794042	-0.607568	-0.0519853	-0.115177	0.248521	1.32114	-0.61487	-0.425034	0.345856	0.111328	-0.778983	-0.0173832
-0.785567	0.190194	-1.06991	-0.0932223	-1.03766	-0.420557	-0.381922	-0.329382	-0.0473155	-1.01402	1.48347	0.367976	-1.0579	-0.793256	-0.153117	1.00671	0.665665	0.194135	-0.993153	0.761864	-0.442532	0.343791	0.363304	-0.206793	0.470899	0.105358	-0.409601	-0.179397	0.372006	-0.0746565	-0.278866	0.231039	0.237925	-0.130951	1.30552	0.0875318	0.267762	0.258142	-0.969176	-0.53415	-0.0838156	0.00545293	0.410527	1.42782	-0.595275	-0.362825	0.210029	0.108476	-0.800367	-0.133063
-0.825155	0.197846	-1.10797	-0.119455	-0.995671	-0.426841	-0.41529	-0.311943	-0.0369588	-1.01547	1.45194	0.26413	-1.06033	-0.811879	-0.180971	0.988399	0.766334	0.173985	-1.02329	0.786802	-0.525202	0.444476	0.41366	-0.281862	0.498283	-0.0347388	-0.427099	-0.178971	0.320218	-0.153577	-0.277599	0.326328	0.25525	-0.146581	1.44823	0.149857	0.292606	0.266614	-1.06697	-0.47507	-0.0781581	0.0301599	0.545341	1.6566	-0.585791	-0.20565	0.167261	0.0800184	-0.869495	-0.253846
-0.837746	0.191787	-1.1412	-0.135447	-0.960343	-0.447389	-0.424971	-0.271531	-0.0448283	-1.01959	1.44414	0.23391	-1.03955	-0.817708	-0.206489	0.956812	0.850672	0.251052	-1.03872	0.702957	-0.578161	0.524458	0.419145	-0.360972	0.522561	-0.241736	-0.487647	-0.179579	0.243086	-0.236772	-0.294147	0.386949	0.548864	-0.235674	1.5	0.347636	0.310487	0.344168	-1.21094	-0.383138	-0.127306	-0.0617474	0.816817	1.74465	-0.683306	-0.0562876	0.245968	-0.00541976	-0.935443	-0.352868
-0.870141	0.162456	-1.1502	-0.13503	-0.973682	-0.461426	-0.443124	-0.256893	-0.0922406	-1.0135	1.41271	0.24318	-1.03172	-0.853562	-0.291419	0.893293	0.962657	0.315067	-1.06139	0.640539	-0.629824	0.60066	0.411558	-0.454944	0.63393	-0.613751	-0.517984	-0.228817	0.230232	-0.385291	-0.286428	0.450864	1.00401	-0.198899	1.50567	0.494807	0.271456	0.44014	-1.23586	-0.357388	-0.111571	-0.22747	1.04188	1.73741	-0.846451	0.0955612	0.361866	-0.183524	-1.02008	-0.406626
-0.865646	0.157753	-1.16294	-0.102717	-1.00569	-0.479503	-0.448031	-0.324145	-0.106625	-1.00132	1.3923	0.235031	-1.03045	-0.842641	-0.321118	0.866577	1.0933	0.456095	-1.07244	0.637859	-0.617132	0.670092	0.522057	-0.549117	0.669774	-0.857254	-0.49714	-0.198811	0.260268	-0.464225	-0.311648	0.543342	1.38165	-0.148439	1.50144	0.67566	0.306537	0.498715	-1.35995	-0.358812	-0.0783164	-0.358943	1.25155	1.61364	-0.917767	0.146345	0.449295	-0.29434	-1.03673	-0.392287
-0.874074	0.157684	-1.16134	-0.107704	-1.00782	-0.48734	-0.416616	-0.360819	-0.100606	-1.00515	1.35109	0.177523	-1.03007	-0.820021	-0.369811	0.837426	1.19033	0.54718	-1.10317	0.596811	-0.687262	0.729084	0.534635	-0.607785	0.727733	-1.05319	-0.474343	-0.188084	0.306833	-0.515363	-0.352987	0.659223	1.52897	-0.0304259	1.41832	0.668359	0.257481	0.533407	-1.43233	-0.392586	-0.0284327	-0.475026	1.31679	1.51976	-0.958531	0.138491	0.415055	-0.342861	-1.11376	-0.344506
-0.872329	0.19506	-1.17821	-0.0902678	-0.977302	-0.496434	-0.372459	-0.347462	-0.0838008	-0.995067	1.31104	0.114924	-1.01252	-0.755461	-0.359576	0.853046	1.32137	0.660344	-1.10996	0.508612	-0.711863	0.762761	0.624276	-0.635109	0.782607	-1.22531	-0.522394	-0.11208	0.316865	-0.519346	-0.454008	0.770407	1.59935	-0.116443	1.33544	0.69181	0.285433	0.647476	-1.44208	-0.45813	0.0133848	-0.556288	1.36526	1.45332	-0.954858	0.0470221	0.391233	-0.388372	-1.14385	-0.224141
-0.891566	0.210686	-1.17722	-0.0968928	-0.956146	-0.493357	-0.320706	-0.323987	-0.0661169	-1.00036	1.26837	0.105037	-1.00337	-0.72013	-0.389558	0.849916	1.42625	0.726436	-1.1381	0.457976	-0.757956	0.797129	0.647732	-0.660974	0.843796	-1.33684	-0.58268	-0.0981076	0.362414	-0.583871	-0.45885	0.82016	1.87686	-0.142783	1.26292	0.636506	0.305873	0.768422	-1.43967	-0.476022	0.0081664	-0.554293	1.4512	1.33629	-0.948395	0.0288904	0.315623	-0.473664	-1.24003	-0.156483
-0.895428	0.21413	-1.1772	-0.066939	-0.949794	-0.492665	-0.312981	-0.331459	-0.0406876	-0.987398	1.22489	0.0656003	-1.00249	-0.678046	-0.368209	0.85306	1.48434	0.802532	-1.15582	0.43582	-0.709729	0.825605	0.727742	-0.733548	0.785728	-1.40919	-0.62001	-0.104886	0.36232	-0.697952	-0.454061	0.875398	2.16854	-0.303505	1.24806	0.777235	0.30477	0.872175	-1.39959	-0.49358	0.0280105	-0.576376	1.52347	1.24044	-0.943061	0.00232301	0.388222	-0.519272	-1.26364	-0.0499981
-0.912522	0.217152	-1.15803	-0.0553427	-0.915358	-0.476089	-0.337722	-0.371814	0.00154676	-1.01947	1.13162	0.00504343	-1.01483	-0.648521	-0.353268	0.818339	1.48573	0.872315	-1.17808	0.504461	-0.724524	0.864026	0.805927	-0.753167	0.666073	-1.39976	-0.597126	-0.130727	0.360284	-0.705476	-0.360617	0.980454	2.16256	-0.337588	1.25904	0.873438	0.361877	0.961032	-1.4184	-0.497823	-0.00519301	-0.568704	1.45866	1.29068	-1.00631	0.0725115	0.437112	-0.503832	-1.3286	-0.0086678
-0.932725	0.226474	-1.12818	-0.0542587	-0.867965	-0.480744	-0.36096	-0.378921	0.0741812	-1.03228	1.02861	-0.0845823	-1.01548	-0.567258	-0.307985	0.770219	1.54528	0.975927	-1.16942	0.53188	-0.715868	0.862551	0.896317	-0.741697	0.577653	-1.33841	-0.554486	-0.107761	0.348338	-0.711101	-0.353227	1.13052	1.99337	-0.295113	1.31241	0.886393	0.332687	1.03897	-1.30604	-0.50894	0.0779977	-0.533749	1.31055	1.38261	-1.0486	0.061302	0.545408	-0.446345	-1.29556	0.0965284
-0.914348	0.243494	-1.08921	-0.0717086	-0.827798	-0.455747	-0.399834	-0.464049	0.129276	-1.03375	0.925956	-0.121384	-1.02906	-0.476216	-0.285119	0.794391	1.65695	1.09403	-1.14015	0.567296	-0.706675	0.88039	1.00583	-0.668501	0.597343	-1.22866	-0.565814	-0.0846371	0.315563	-0.651945	-0.310136	1.3313	1.87662	-0.26706	1.31038	0.920219	0.357217	1.07624	-1.21575	-0.51772	0.0765854	-0.507195	1.14307	1.48259	-1.07495	0.0260828	0.608601	-0.42735	-1.29072	0.110423
-0.873281	0.242632	-1.04146	-0.0894993	-0.814005	-0.450771	-0.38925	-0.535935	0.159661	-1.01583	0.884758	-0.165683	-1.04642	-0.369906	-0.268463	0.816177	1.76564	1.1619	-1.14567	0.496504	-0.662727	0.885765	1.12038	-0.668532	0.593813	-1.06866	-0.550346	-0.068338	0.267875	-0.670789	-0.260191	1.58722	1.8618	-0.217272	1.19605	0.908524	0.256609	1.00715	-1.22436	-0.523014	0.203341	-0.511677	1.08106	1.39717	-1.01694	-0.0280447	0.723636	-0.381334	-1.24657	0.0519387
-0.889284	0.250124	-0.993701	-0.117491	-0.74755	-0.40777	-0.34096	-0.62444	0.191906	-1.00817	0.8471	-0.241278	-1.05568	-0.282478	-0.218668	0.85014	1.77493	1.13672	-1.1838	0.345677	-0.633298	0.90679	1.31541	-0.663629	0.508533	-1.03474	-0.540866	-0.0730108	0.146643	-0.592632	-0.186401	1.81874	1.77187	-0.436918	1.02776	1.022	0.207165	0.915345	-1.16415	-0.558867	0.176692	-0.51212	0.998318	1.30476	-1.04771	-0.0895641	0.78439	-0.327967	-1.25169	-0.0422676
-0.970406	0.276516	-0.957246	-0.1223	-0.701302	-0.4079	-0.292914	-0.66739	0.286816	-1.01627	0.817576	-0.256822	-1.0483	-0.180187	-0.163406	0.816783	1.77023	1.09682	-1.20696	0.275533	-0.603333	0.912624	1.44834	-0.627492	0.390342	-1.00417	-0.455151	-0.0380921	0.0961215	-0.493403	-0.157259	2.03087	1.43468	-0.54665	0.890843	1.02732	0.245674	0.889344	-1.08249	-0.58389	0.244127	-0.439073	0.881965	1.15208	-1.05194	-0.0915266	0.779804	-0.248545	-1.23871	-0.195627
-0.980743	0.328441	-0.92274	-0.12383	-0.613019	-0.409771	-0.239203	-0.736585	0.419981	-1.013	0.779126	-0.291905	-1.03953	-0.0895734	-0.0807005	0.799412	1.78491	1.16117	-1.1775	0.25768	-0.564405	0.933148	1.4844	-0.54621	0.336801	-0.8002	-0.396278	-0.0203851	0.0772793	-0.401432	-0.17293	2.14979	1.19338	-0.657971	0.858798	1.01319	0.286772	0.86	-0.987648	-0.615432	0.191742	-0.307316	0.722986	1.10939	-1.00033	-0.181261	0.719874	-0.158762	-1.21844	-0.242471
-1.0001	0.370376	-0.882691	-0.107812	-0.591428	-0.445488	-0.213877	-0.839398	0.529462	-1.00013	0.71405	-0.235416	-1.02572	0.0258427	-0.0556266	0.796931	1.81049	1.23365	-1.14974	0.292073	-0.519106	0.9605	1.38523	-0.495178	0.349682	-0.675526	-0.358616	-0.0408728	0.114049	-0.317943	-0.162779	2.2889	0.851162	-0.538069	0.764539	0.95561	0.373527	0.837147	-0.91963	-0.679903	0.169573	-0.278343	0.526106	1.14452	-0.938928	-0.267345	0.61508	-0.112054	-1.19076	-0.367472
-0.938936	0.401918	-0.837479	-0.116797	-0.516954	-0.490005	-0.113588	-0.911628	0.617272	-0.991593	0.639202	-0.238862	-1.03501	0.0927166	0.00640537	0.815293	1.7733	1.30956	-1.118	0.198334	-0.529051	1.01333	1.27265	-0.448005	0.309179	-0.534222	-0.326782	-0.0853215	0.17591	-0.225685	-0.111034	2.36661	0.538494	-0.597022	0.652355	0.939727	0.398525	0.76932	-0.877754	-0.765914	0.117488	-0.298528	0.237894	1.16915	-0.877395	-0.384839	0.508033	-0.0726508	-1.14954	-0.372103
-0.933434	0.429965	-0.784204	-0.0925442	-0.475857	-0.527706	-0.00225631	-0.96672	0.671027	-0.979353	0.557498	-0.148486	-1.03231	0.203055	0.0113227	0.825014	1.70043	1.21743	-1.06611	0.0825474	-0.482299	1.08811	1.16792	-0.367926	0.224646	-0.661908	-0.260942	-0.154623	0.239601	-0.0896386	-0.0670335	2.41924	0.178325	-0.564273	0.516754	1.01106	0.428572	0.721126	-0.756394	-0.816984	0.0949085	-0.279403	-0.0719895	1.05649	-0.945333	-0.408387	0.402709	-0.0186855	-1.14165	-0.461192
-0.837915	0.447728	-0.730013	-0.0794492	-0.40389	-0.572118	0.0907727	-0.977695	0.759715	-0.980329	0.503271	-0.0507854	-1.03153	0.290013	0.090784	0.878613	1.6148	1.18737	-0.989212	0.0191228	-0.510312	1.19944	1.11784	-0.249853	0.143263	-0.596253	-0.204803	-0.150795	0.334348	0.0240476	0.00428259	2.44199	-0.134022	-0.580671	0.36586	1.07705	0.446838	0.661762	-0.662475	-0.814872	0.0956863	-0.196665	-0.314107	0.801329	-0.97836	-0.437307	0.308039	0.0945687	-1.0843	-0.480889
-0.745659	0.452098	-0.674601	-0.0327309	-0.33769	-0.588217	0.143582	-0.991474	0.836079	-0.995091	0.467373	0.113898	-1.01584	0.391265	0.143397	0.892975	1.53278	1.11519	-0.938083	0.0154736	-0.483681	1.29344	1.0497	-0.177701	0.0650687	-0.545198	-0.101455	-0.179142	0.408732	0.0612661	0.0806646	2.44751	-0.270058	-0.430546	0.183105	1.06305	0.498675	0.67487	-0.549063	-0.760639	0.08212	-0.00848114	-0.412478	0.558322	-1.01871	-0.438347	0.238654	0.229125	-1.0403	-0.483209
-0.690651	0.475302	-0.623918	-0.0323318	-0.275442	-0.583474	0.177977	-0.984137	0.963606	-0.99444	0.442031	0.158911	-0.968711	0.460406	0.24912	0.901438	1.38579	1.10659	-0.925035	0.0501308	-0.520266	1.34165	0.968781	-0.149612	0.00346474	-0.475023	-0.0323932	-0.158801	0.481699	0.0841288	0.179108	2.43595	-0.422249	-0.434096	0.0289642	1.13925	0.543822	0.672387	-0.408247	-0.698422	0.0372248	0.120704	-0.411907	0.488408	-0.991838	-0.454584	0.153926	0.305002	-0.983176	-0.45831
-0.642072	0.492507	-0.574158	0.0108736	-0.23902	-0.601234	0.228341	-0.976337	1.07386	-1.00382	0.411518	0.212133	-0.921637	0.533677	0.274814	0.88722	1.15054	1.05196	-0.917252	0.0644903	-0.441079	1.36999	0.832881	-0.100221	-0.0434834	-0.436565	0.0398945	-0.248339	0.536506	0.0814229	0.29556	2.33625	-0.442691	-0.411349	-0.0905032	1.1269	0.595957	0.644228	-0.324112	-0.660647	-0.0761301	0.192993	-0.486139	0.532053	-0.987866	-0.397527	0.124965	0.322193	-0.948892	-0.444912
-0.592289	0.522983	-0.524515	0.0318016	-0.222107	-0.609044	0.346605	-0.980842	1.1548	-0.97611	0.394334	0.255265	-0.850062	0.603115	0.309377	0.949303	0.946212	0.992411	-0.875078	-0.0532168	-0.403677	1.38344	0.775571	-0.0203168	-0.0976758	-0.423022	0.0381724	-0.239445	0.608872	0.129506	0.4164	2.242	-0.553224	-0.485454	-0.201075	1.19988	0.565138	0.610203	-0.221011	-0.656795	-0.173514	0.207885	-0.545885	0.524701	-0.997464	-0.347645	0.0529569	0.316702	-0.965398	-0.470392
-0.534576	0.537411	-0.465964	0.0616068	-0.206832	-0.642211	0.404803	-0.963018	1.22155	-0.952473	0.367688	0.314357	-0.795251	0.656724	0.336499	1.04437	0.815382	0.894521	-0.848761	-0.145734	-0.310457	1.40465	0.69172	0.0241072	-0.160337	-0.219723	0.0376909	-0.270618	0.6228	0.128263	0.493598	2.13252	-0.524678	-0.470254	-0.256546	1.15341	0.58756	0.614159	-0.184925	-0.671783	-0.223337	0.26676	-0.628824	0.466096	-1.03713	-0.331771	-0.0109691	0.312588	-0.997378	-0.432998
-0.461188	0.544263	-0.449255	0.0598308	-0.190821	-0.637054	0.458694	-0.903473	1.21979	-0.94137	0.330263	0.386688	-0.753945	0.638979	0.341117	1.09612	0.774603	0.780319	-0.801069	-0.235728	-0.271359	1.41744	0.654866	-0.0153555	-0.187408	-0.101632	0.0440426	-0.239511	0.610561	0.105112	0.540364	2.03932	-0.492725	-0.497718	-0.286281	1.12264	0.462606	0.636716	-0.157156	-0.698436	-0.201341	0.250188	-0.589426	0.386353	-1.07178	-0.389142	-0.0558795	0.289001	-1.02647	-0.36461
-0.422544	0.556004	-0.44078	0.0677372	-0.143691	-0.641343	0.457962	-0.836001	1.2295	-0.960859	0.319515	0.416211	-0.710806	0.606549	0.33686	1.14081	0.765553	0.645235	-0.815161	-0.269978	-0.1736	1.42169	0.623651	-0.092606	-0.200055	0.052965	0.0331604	-0.283014	0.571905	0.120004	0.615861	2.02954	-0.554359	-0.442855	-0.281573	1.01172	0.460515	0.654407	-0.122477	-0.701841	-0.158765	0.22902	-0.590559	0.384571	-1.08313	-0.410606	-0.0048177	0.272057	-0.951946	-0.296213
-0.407726	0.553274	-0.444341	0.0602366	-0.131986	-0.667397	0.477882	-0.744593	1.18662	-0.96832	0.27634	0.419336	-0.673315	0.527578	0.335869	1.14248	0.76097	0.605117	-0.816288	-0.314308	-0.0861195	1.40758	0.628889	-0.14968	-0.278953	0.0780296	0.0137463	-0.311958	0.534548	0.167589	0.717112	2.01286	-0.639492	-0.504192	-0.242187	0.958363	0.396235	0.592484	-0.0981863	-0.697914	-0.0677871	0.123903	-0.549633	0.390674	-1.14568	-0.433799	0.113773	0.214904	-0.884587	-0.236549
-0.403912	0.539124	-0.404781	0.0766326	-0.107537	-0.665347	0.47635	-0.715125	1.1922	-0.939409	0.31644	0.454467	-0.619416	0.508634	0.363779	1.14127	0.747246	0.574263	-0.819002	-0.329383	-0.0133358	1.38283	0.707966	-0.204019	-0.460668	0.0422377	0.0219004	-0.305754	0.521394	0.228082	0.821657	2.04611	-0.75446	-0.600803	-0.212924	0.974287	0.528142	0.576304	-0.0788667	-0.695586	-0.000138845	-0.0362726	-0.548382	0.405906	-1.14154	-0.419438	0.304411	0.185896	-0.850906	-0.177505
-0.37376	0.515314	-0.368899	0.104847	-0.152013	-0.68634	0.447509	-0.672266	1.18411	-0.908035	0.313334	0.459855	-0.575941	0.447554	0.404575	1.11633	0.695461	0.58421	-0.806442	-0.253282	0.0811929	1.37711	0.740137	-0.247087	-0.614761	-0.0357972	0.0264073	-0.315314	0.503189	0.2162	0.866662	1.98764	-0.724198	-0.779983	-0.168382	1.06032	0.564454	0.597959	-0.0842622	-0.705819	0.00696024	-0.199767	-0.49571	0.323534	-1.17551	-0.429896	0.402191	0.110938	-0.880993	-0.104698
-0.334674	0.511854	-0.344881	0.128054	-0.154585	-0.656142	0.43585	-0.693397	1.17986	-0.899456	0.367631	0.487383	-0.53514	0.430559	0.425612	1.09811	0.659498	0.554034	-0.815802	-0.238295	0.202898	1.37046	0.844467	-0.270646	-0.699069	-0.0690217	0.0288262	-0.330166	0.53109	0.177929	0.922953	1.91755	-0.718317	-0.847168	-0.207227	1.07906	0.656876	0.634079	-0.104781	-0.704933	-0.0317741	-0.268903	-0.436929	0.254755	-1.15767	-0.429972	0.476838	0.084422	-0.891949	-0.0422789
-0.325625	0.508809	-0.340036	0.112425	-0.195743	-0.68816	0.408699	-0.720982	1.14733	-0.892911	0.357529	0.475373	-0.502624	0.36857	0.46367	1.09787	0.629041	0.499318	-0.827493	-0.191306	0.343159	1.37525	0.865948	-0.299257	-0.720669	-0.0439129	0.00655084	-0.350207	0.531054	0.140843	0.966794	1.81629	-0.68291	-0.931403	-0.258935	1.07957	0.632656	0.619119	-0.114058	-0.71814	-0.0367914	-0.245731	-0.384853	0.141912	-1.16857	-0.463469	0.46049	0.0255703	-0.901032	-0.0381803
-0.30095	0.523122	-0.330581	0.0674983	-0.221737	-0.680318	0.433859	-0.718235	1.11998	-0.883456	0.372849	0.453945	-0.464879	0.36237	0.507094	1.07695	0.609137	0.471837	-0.820708	-0.271535	0.41205	1.34982	0.890509	-0.32296	-0.733318	-0.0361608	0.0052721	-0.316755	0.545968	0.134683	1.04596	1.72379	-0.659341	-0.950038	-0.298416	1.01106	0.612494	0.590145	-0.168362	-0.712455	0.037674	-0.208555	-0.383809	0.216685	-1.12663	-0.509567	0.470213	0.0164964	-0.886217	-0.0259535
-0.289306	0.511928	-0.316236	0.0341654	-0.213846	-0.678758	0.422938	-0.712527	1.08934	-0.87453	0.378749	0.459549	-0.437021	0.351446	0.548478	1.08405	0.555866	0.396342	-0.786791	-0.271788	0.426674	1.36731	0.88615	-0.334317	-0.746606	-0.0558117	-0.00989202	-0.237357	0.533352	0.141653	1.14789	1.64675	-0.580183	-1.01775	-0.325441	0.94423	0.559527	0.582634	-0.150462	-0.756505	0.0239874	-0.19847	-0.412601	0.301695	-1.08174	-0.522898	0.413585	-0.0252718	-0.840056	0.000302378
-0.304381	0.523109	-0.30297	0.0421463	-0.217313	-0.654515	0.47513	-0.706608	1.04427	-0.870406	0.39105	0.432684	-0.422055	0.342707	0.58367	1.04389	0.536641	0.373246	-0.753325	-0.330469	0.437907	1.38152	0.868362	-0.334048	-0.729253	-0.0416976	0.00457348	-0.245	0.53103	0.117288	1.28519	1.60373	-0.548078	-0.866619	-0.30932	0.794234	0.558562	0.594106	-0.18283	-0.718778	0.0191907	-0.161962	-0.367736	0.288977	-1.05554	-0.490012	0.377234	-0.00476267	-0.812337	0.0366203
-0.33254	0.512475	-0.296455	0.0557493	-0.176982	-0.646095	0.535212	-0.718214	0.987248	-0.862451	0.402635	0.497802	-0.428502	0.326945	0.604313	1.00024	0.505145	0.267344	-0.707143	-0.382919	0.47769	1.42742	0.857853	-0.295986	-0.702267	0.00519088	0.0665982	-0.27674	0.590517	0.0962038	1.44263	1.56598	-0.506729	-0.77745	-0.314227	0.745456	0.491565	0.533813	-0.179659	-0.72129	-0.0150475	-0.118001	-0.288647	0.263183	-1.02874	-0.429134	0.28977	-0.0163799	-0.830663	0.012689
-0.361056	0.506079	-0.28867	0.0812219	-0.211355	-0.665977	0.564429	-0.727989	0.937745	-0.866237	0.396214	0.634358	-0.43501	0.2851	0.628361	0.966019	0.475379	0.219905	-0.653519	-0.40952	0.49499	1.46909	0.843326	-0.332776	-0.681623	0.00601998	0.118342	-0.326941	0.593487	0.0603926	1.56017	1.50506	-0.481934	-0.669856	-0.275318	0.672314	0.500478	0.521423	-0.284598	-0.688435	0.0253706	-0.151337	-0.191714	0.151379	-1.01446	-0.411264	0.315015	-0.0111017	-0.863287	0.000139182
-0.387095	0.483863	-0.284958	0.0849573	-0.192299	-0.691555	0.541934	-0.705363	0.903422	-0.848566	0.3627	0.779426	-0.422087	0.2703	0.635671	0.989535	0.402308	0.166044	-0.600898	-0.444207	0.489116	1.5305	0.852285	-0.39263	-0.656017	-0.033119	0.123581	-0.272046	0.6272	0.0636987	1.64855	1.40965	-0.447867	-0.665606	-0.238997	0.631196	0.493962	0.442651	-0.301547	-0.686174	0.0938657	-0.192914	-0.181176	0.185496	-0.989079	-0.426418	0.311637	-0.0123466	-0.865097	0.102897
-0.430039	0.470817	-0.277567	0.0807637	-0.212511	-0.730106	0.518307	-0.680909	0.891499	-0.832165	0.323802	0.929307	-0.389745	0.239855	0.654519	1.01945	0.352964	0.128238	-0.540781	-0.454381	0.453533	1.58859	0.886405	-0.430168	-0.676151	-0.0336201	0.10126	-0.207707	0.60101	0.111489	1.6809	1.28579	-0.41635	-0.620033	-0.178021	0.505893	0.579071	0.448692	-0.308656	-0.638499	0.118721	-0.23833	-0.17716	0.133236	-0.962176	-0.440025	0.346996	0.0160096	-0.808792	0.202685
-0.449952	0.454111	-0.267422	0.0782351	-0.174543	-0.778199	0.566749	-0.658685	0.885989	-0.806552	0.322814	1.0382	-0.360266	0.192734	0.672585	1.01286	0.268015	0.0895353	-0.472365	-0.536463	0.432331	1.62764	0.944881	-0.414944	-0.712089	0.0330583	0.110052	-0.1008	0.647826	0.193805	1.74068	1.17949	-0.41356	-0.603431	-0.124133	0.436472	0.587652	0.465247	-0.168407	-0.609853	0.16615	-0.153823	-0.18134	0.117316	-0.919574	-0.445961	0.267633	0.0682917	-0.768381	0.252443
-0.440991	0.435286	-0.251737	0.0711912	-0.157331	-0.814671	0.619826	-0.624319	0.875087	-0.801816	0.357233	1.16834	-0.341715	0.142819	0.694097	0.966982	0.222961	0.0715801	-0.397354	-0.589664	0.364445	1.65202	0.963256	-0.338005	-0.728172	0.11878	0.145177	-0.0666505	0.607614	0.279022	1.77266	1.11146	-0.444744	-0.576172	-0.0646865	0.41156	0.603549	0.45384	-0.165877	-0.595404	0.129158	-0.0904473	-0.151555	0.00454306	-0.873497	-0.400025	0.235919	0.128609	-0.729788	0.162932
-0.439513	0.412857	-0.24146	0.0485018	-0.137778	-0.855031	0.586547	-0.657616	0.84511	-0.776499	0.371491	1.21265	-0.327341	0.105013	0.686929	0.920142	0.148489	0.0791006	-0.38105	-0.560784	0.323369	1.67781	0.952629	-0.297197	-0.713059	0.121093	0.177147	-0.0541586	0.595821	0.334704	1.89367	1.05433	-0.427925	-0.555648	-0.120986	0.396294	0.571371	0.386287	-0.183768	-0.571744	0.0786335	-0.0420178	-0.160937	-0.0379085	-0.887229	-0.385231	0.193101	0.144439	-0.711206	0.157086
-0.440774	0.387539	-0.232254	0.0277217	-0.106997	-0.85939	0.537541	-0.676641	0.835038	-0.786887	0.330622	1.30301	-0.326287	0.101885	0.693647	0.865614	0.13027	0.0142052	-0.343624	-0.560256	0.272541	1.69983	0.899168	-0.264032	-0.645398	0.0715092	0.282246	-0.0717893	0.561045	0.369776	2.0101	1.02483	-0.451546	-0.558555	-0.17928	0.380553	0.554893	0.328057	-0.28092	-0.546841	0.00413303	-0.115365	-0.205027	-0.0531545	-0.853005	-0.365276	0.235056	0.147211	-0.670057	0.178579
-0.430399	0.388415	-0.216977	0.0147838	-0.0813298	-0.888964	0.541414	-0.726494	0.808979	-0.771645	0.291561	1.38112	-0.298991	0.0923875	0.729374	0.88722	0.111447	-0.0672833	-0.313097	-0.598249	0.261652	1.70495	0.866403	-0.233918	-0.679386	-0.0139477	0.326058	-0.0339427	0.562732	0.391779	2.12071	0.993556	-0.434222	-0.548259	-0.154955	0.395718	0.546221	0.358537	-0.301426	-0.49665	-0.037534	-0.136179	-0.217161	0.0140109	-0.818603	-0.353769	0.254341	0.139182	-0.591613	0.249718
-0.439012	0.392818	-0.204162	0.0322637	-0.045097	-0.870418	0.571396	-0.747654	0.837079	-0.772031	0.255328	1.48615	-0.277342	0.0651869	0.768332	0.896276	0.0869859	-0.0788786	-0.244058	-0.662764	0.219524	1.68994	0.847197	-0.203114	-0.643036	-0.0570123	0.380725	0.00259342	0.54775	0.384936	2.11555	0.963566	-0.412941	-0.506974	-0.0493087	0.353418	0.572479	0.39332	-0.257778	-0.500333	-0.0264083	-0.199547	-0.20142	0.0435875	-0.766633	-0.354091	0.323052	0.178824	-0.546623	0.232354
-0.418277	0.414033	-0.192787	0.0688127	-0.0640702	-0.852135	0.60502	-0.780412	0.837069	-0.731217	0.24655	1.52016	-0.244717	0.0430194	0.801015	0.915053	0.0745478	-0.0140456	-0.264864	-0.638873	0.205786	1.67674	0.867631	-0.0952708	-0.679922	-0.0374194	0.381807	0.0382894	0.555185	0.392466	2.10169	0.924837	-0.345288	-0.377214	0.0814618	0.27242	0.584227	0.450899	-0.266029	-0.46436	-0.0423978	-0.189149	-0.15162	0.0802558	-0.763139	-0.334427	0.337046	0.242637	-0.514556	0.221232
-0.4443	0.443046	-0.188306	0.0892152	-0.0591451	-0.807382	0.581682	-0.756961	0.890579	-0.726071	0.218354	1.5815	-0.224393	0.0161552	0.818644	0.869915	-0.00958406	0.0666129	-0.291678	-0.584125	0.171145	1.65672	0.901425	-0.0322193	-0.685164	-0.12525	0.4104	0.0563513	0.604576	0.420723	2.08147	0.847114	-0.320726	-0.496863	0.0734498	0.237756	0.613572	0.456684	-0.250125	-0.452993	-0.0617533	-0.176178	-0.207767	0.103777	-0.748724	-0.383434	0.304235	0.331615	-0.567538	0.289462
-0.456981	0.458723	-0.182775	0.0843725	-0.0495118	-0.812506	0.633403	-0.716717	0.906933	-0.708918	0.219348	1.61529	-0.196736	-0.00119265	0.846335	0.878874	-0.0600465	0.0963566	-0.325927	-0.626289	0.168092	1.65839	0.882171	0.0374556	-0.746852	-0.109805	0.37217	0.0861565	0.652604	0.491476	2.0685	0.826182	-0.335987	-0.577545	0.0955991	0.266199	0.668487	0.46631	-0.250276	-0.394097	-0.0901474	-0.0739953	-0.220418	-0.00796916	-0.749382	-0.39852	0.218446	0.417409	-0.558276	0.385507
-0.501293	0.451433	-0.171692	0.0862479	-0.0108506	-0.816047	0.685345	-0.679456	0.930098	-0.6895	0.251929	1.71716	-0.16607	-0.0204863	0.868221	0.895067	-0.135124	0.0432037	-0.321307	-0.661718	0.174255	1.65739	0.840142	0.0249161	-0.772652	-0.140643	0.325752	0.113616	0.67067	0.564127	2.0184	0.793686	-0.346004	-0.731615	0.0506286	0.33597	0.691092	0.415935	-0.178483	-0.379371	-0.084151	-0.0110919	-0.277112	-0.0411039	-0.75166	-0.424645	0.173272	0.479329	-0.521474	0.438222
-0.470502	0.437736	-0.160214	0.0672144	0.00684559	-0.805687	0.746287	-0.672681	0.934914	-0.675317	0.270051	1.6917	-0.148947	-0.0305063	0.881531	0.923146	-0.128125	0.0236209	-0.324174	-0.74251	0.200016	1.6785	0.778595	0.0482557	-0.726685	-0.0928714	0.286718	0.135314	0.646906	0.608253	1.9723	0.792109	-0.35091	-0.641551	0.0181367	0.301902	0.663258	0.313371	-0.220701	-0.322563	-0.0713829	0.0451592	-0.215846	-0.0714125	-0.808409	-0.421518	0.172739	0.528866	-0.439056	0.39906
-0.455051	0.44377	-0.153221	0.0691654	0.0310331	-0.790636	0.778126	-0.708753	0.922381	-0.65619	0.264168	1.70443	-0.135594	-0.0258862	0.910116	0.908696	-0.136096	-0.025188	-0.319221	-0.759411	0.216887	1.69068	0.814579	0.0410205	-0.739928	-0.0849133	0.306034	0.183975	0.592362	0.609208	1.92949	0.733003	-0.305497	-0.56674	0.0780684	0.27635	0.632151	0.271804	-0.248623	-0.303183	-0.0411245	0.0324001	-0.201746	-0.0284076	-0.749761	-0.412014	0.202324	0.532077	-0.433261	0.396778
-0.447318	0.456606	-0.158668	0.0377744	0.0583903	-0.788799	0.769152	-0.719159	0.927081	-0.653773	0.245452	1.66339	-0.0940626	-0.00756529	0.921994	0.87492	-0.112781	-0.0443031	-0.319675	-0.780691	0.184796	1.67842	0.832884	0.0434203	-0.748982	-0.0282017	0.3128	0.21139	0.573352	0.643228	1.93402	0.683273	-0.275093	-0.527692	0.024237	0.285063	0.595733	0.28717	-0.25004	-0.260875	-0.0216598	0.0312017	-0.159661	-0.0381296	-0.68519	-0.432919	0.181548	0.570221	-0.408582	0.376606
-0.47106	0.464327	-0.168883	0.0661137	0.0751463	-0.813535	0.790098	-0.785405	0.891905	-0.646189	0.223699	1.69372	-0.0564312	-0.00766045	0.92648	0.832826	-0.116773	-0.102588	-0.318881	-0.77226	0.198306	1.66689	0.832787	0.055173	-0.798743	-0.0563049	0.326314	0.245283	0.545945	0.701432	1.90065	0.61814	-0.230833	-0.544475	0.0334221	0.244293	0.593846	0.340322	-0.218454	-0.258108	0.0162762	-0.0186397	-0.230599	-0.0880455	-0.608612	-0.430121	0.201263	0.601679	-0.387835	0.414803
-0.491986	0.453018	-0.164899	0.0721402	0.0848069	-0.814593	0.728116	-0.747745	0.893867	-0.658081	0.22671	1.70374	-0.0247274	-0.00589211	0.921572	0.76069	-0.0845475	-0.157864	-0.333966	-0.633154	0.214264	1.65339	0.796136	0.0814784	-0.780567	-0.0640002	0.329373	0.263934	0.534286	0.753447	1.89579	0.587778	-0.214204	-0.594472	-0.0544453	0.253715	0.59585	0.272516	-0.179713	-0.251396	0.0309934	-0.00666258	-0.222044	0.0134227	-0.606189	-0.46066	0.267851	0.687108	-0.347582	0.362598
-0.46846	0.449627	-0.157035	0.0617473	0.0865639	-0.805712	0.698595	-0.70742	0.913408	-0.644848	0.238995	1.73398	-0.018617	-0.030565	0.94411	0.740492	-0.0894338	-0.186254	-0.336294	-0.580999	0.236936	1.66897	0.764909	0.104702	-0.765975	-0.100385	0.336674	0.298288	0.468538	0.751395	1.8507	0.580664	-0.243535	-0.578058	-0.0142157	0.220613	0.608807	0.219584	-0.25993	-0.263811	0.0500858	-0.0226335	-0.21812	0.109584	-0.596843	-0.435075	0.341687	0.712866	-0.347695	0.334589
-0.457744	0.445534	-0.158979	0.0519148	0.127864	-0.78219	0.660694	-0.621974	0.948699	-0.610551	0.244039	1.77275	-0.0120556	-0.037597	0.984489	0.76806	-0.0899649	-0.208079	-0.355133	-0.49925	0.239531	1.6595	0.768419	0.0673394	-0.733585	0.0210674	0.337218	0.297341	0.497466	0.764671	1.82859	0.618064	-0.251143	-0.56667	-0.0389344	0.272836	0.645441	0.209012	-0.234684	-0.293382	0.074042	0.00104618	-0.169199	0.158774	-0.599739	-0.43231	0.313133	0.723219	-0.362187	0.260421
-0.440846	0.461067	-0.163738	0.045413	0.138024	-0.784011	0.66908	-0.612403	0.949785	-0.575051	0.228136	1.83106	0.0136827	-0.0518523	1.0041	0.774196	-0.0899458	-0.16872	-0.35237	-0.529229	0.210057	1.66772	0.732284	0.0547091	-0.710297	0.000267585	0.364811	0.293746	0.481024	0.778812	1.81268	0.680746	-0.276064	-0.579162	0.00436506	0.264702	0.67712	0.253764	-0.219354	-0.279807	0.083709	-0.0174018	-0.173037	0.110639	-0.614292	-0.420997	0.279215	0.698664	-0.350887	0.205029
-0.478712	0.470959	-0.184511	0.0776357	0.140021	-0.773807	0.70026	-0.649679	0.894677	-0.565841	0.190918	1.8532	0.0423491	-0.0520432	1.00319	0.763345	-0.0685066	-0.16965	-0.375892	-0.583882	0.229165	1.68007	0.714645	0.0796018	-0.675015	-0.00867032	0.37329	0.243235	0.497276	0.829334	1.73002	0.75521	-0.192154	-0.537584	0.0217795	0.254576	0.737498	0.207419	-0.140946	-0.262985	0.0705639	-0.00915011	-0.241974	0.0539445	-0.650631	-0.391903	0.236316	0.719033	-0.342337	0.126179
-0.511556	0.468554	-0.189409	0.0569929	0.15378	-0.777607	0.740011	-0.644174	0.875834	-0.547085	0.211477	1.85881	0.0997157	-0.0363182	0.988424	0.723435	-0.0610396	-0.14103	-0.373639	-0.660633	0.211787	1.72706	0.689582	0.103334	-0.6466	-0.0415578	0.375594	0.281125	0.460823	0.849666	1.66932	0.793296	-0.0626682	-0.510084	0.0698112	0.236127	0.703618	0.141286	-0.0872637	-0.229568	0.0491482	0.0545964	-0.229668	0.0241147	-0.620174	-0.371648	0.216713	0.764486	-0.290181	0.0785414
-0.50768	0.453022	-0.198584	0.0798638	0.153537	-0.773777	0.747914	-0.660508	0.831553	-0.532038	0.236163	1.81527	0.124822	-0.039999	0.968305	0.783554	-0.0964685	-0.176781	-0.38099	-0.630616	0.217543	1.75898	0.58816	0.0518022	-0.648584	-0.0536472	0.322827	0.267802	0.474109	0.840663	1.61923	0.761995	0.0914937	-0.447542	0.0369877	0.21231	0.690193	0.10641	-0.153858	-0.243067	0.0145935	0.0517751	-0.253382	-0.0209857	-0.624143	-0.319095	0.15796	0.764657	-0.287968	0.00505643
-0.515583	0.442656	-0.17822	0.0481311	0.17118	-0.778916	0.787087	-0.626936	0.816757	-0.484699	0.241557	1.76516	0.165097	-0.0350137	0.967256	0.765749	-0.127502	-0.141817	-0.386495	-0.605332	0.192129	1.79304	0.531926	-0.0295951	-0.639198	-0.0814661	0.312043	0.331987	0.451927	0.806056	1.64469	0.74349	0.13522	-0.411748	0.0157673	0.162613	0.699203	0.120515	-0.114939	-0.223547	0.0186323	0.0540379	-0.151648	-0.0292558	-0.575821	-0.349268	0.143422	0.770267	-0.279166	-0.01409
-0.500063	0.448251	-0.17199	0.0287427	0.164604	-0.762168	0.745782	-0.610649	0.817295	-0.450741	0.211298	1.73303	0.181984	-0.0471894	0.971157	0.738818	-0.134571	-0.09831	-0.366359	-0.529549	0.191019	1.82595	0.546381	-0.0425689	-0.596314	-0.229536	0.291059	0.32329	0.425723	0.727016	1.63745	0.721287	0.176045	-0.397222	-0.0283947	0.122799	0.724554	0.156288	-0.12519	-0.232597	-0.0373401	-0.0279596	-0.135977	0.00956046	-0.623268	-0.364479	0.205176	0.706674	-0.319748	-0.0847993
-0.510928	0.462236	-0.154276	0.00400758	0.223129	-0.745856	0.738134	-0.557406	0.820229	-0.389041	0.162693	1.70168	0.223502	-0.0139869	1.00439	0.681496	-0.119316	-0.0810236	-0.344077	-0.583111	0.175363	1.84734	0.688434	0.0221876	-0.518089	-0.275272	0.294504	0.355418	0.382647	0.700252	1.62469	0.737299	0.134603	-0.309877	-0.0138898	0.0229216	0.704434	0.20992	-0.0653735	-0.214945	-0.0494843	-0.0198699	-0.0725389	-0.0467542	-0.587647	-0.374277	0.236401	0.70513	-0.265294	-0.05983
-0.485658	0.47531	-0.158619	0.0275058	0.277031	-0.743897	0.628298	-0.506485	0.832062	-0.341034	0.133826	1.67708	0.258776	0.00521167	1.00892	0.716602	-0.137875	-0.0738616	-0.315269	-0.43396	0.1825	1.85079	0.727707	-7.74e-05	-0.517628	-0.318476	0.262518	0.346234	0.341679	0.682452	1.59314	0.693177	0.0904638	-0.352672	-0.0335294	-0.0300287	0.708497	0.15158	-0.0346272	-0.278531	-0.0637556	-0.0969094	-0.0719562	-0.0950723	-0.531074	-0.374929	0.199437	0.644609	-0.279818	-0.0625447
-0.490592	0.470981	-0.159317	0.0432879	0.31512	-0.728039	0.645371	-0.508513	0.825654	-0.306206	0.105696	1.65939	0.302183	0.0494788	1.0227	0.767471	-0.167136	-0.127177	-0.325739	-0.445766	0.18023	1.82112	0.705884	-0.00243941	-0.57383	-0.242148	0.231627	0.363119	0.278414	0.711243	1.58591	0.673952	-0.0233639	-0.346981	-0.0454462	-0.0584936	0.685409	0.1394	-0.039623	-0.290889	-0.066996	-0.138379	-0.0793131	-0.0983392	-0.497446	-0.346164	0.131435	0.616589	-0.270904	-0.0391014
-0.473839	0.47284	-0.165055	0.0743129	0.372183	-0.701828	0.659509	-0.544886	0.8629	-0.299378	0.0863303	1.66411	0.326806	0.0562077	1.02351	0.774618	-0.19482	-0.145777	-0.36211	-0.361052	0.141062	1.77527	0.644329	-0.00417894	-0.670368	-0.145767	0.24901	0.366775	0.269156	0.719874	1.5673	0.684058	-0.15999	-0.407462	-0.108043	-0.0605732	0.711099	0.109515	0.0372105	-0.330699	-0.106246	-0.207601	-0.155738	-0.0148606	-0.467038	-0.38268	0.102201	0.564468	-0.316658	-0.046882
-0.470392	0.467443	-0.154987	0.0850657	0.388165	-0.680986	0.71814	-0.582364	0.89768	-0.314484	0.051391	1.60083	0.334826	0.0474685	1.01542	0.723996	-0.178823	-0.163837	-0.379016	-0.449985	0.0906335	1.76301	0.628864	0.0539887	-0.643254	-0.074088	0.270253	0.363976	0.25907	0.714459	1.5688	0.74088	-0.171082	-0.285262	-0.110256	-0.106611	0.647651	0.0227148	0.0783062	-0.283525	-0.136447	-0.164459	-0.156238	0.0642621	-0.492757	-0.344394	0.145142	0.558065	-0.280232	-0.0406057
-0.44609	0.47256	-0.142827	0.111497	0.449147	-0.663961	0.745657	-0.606084	0.925058	-0.31392	0.0736579	1.55061	0.339287	0.024199	1.02956	0.707366	-0.191174	-0.118563	-0.399823	-0.482983	0.0477662	1.74479	0.597344	0.0511636	-0.641673	-0.0596717	0.269667	0.374787	0.341959	0.697375	1.5577	0.751053	-0.106274	-0.288749	-0.0229484	-0.12533	0.652144	0.0476162	0.145155	-0.306082	-0.152336	-0.130961	-0.110149	0.0638631	-0.433862	-0.366718	0.142259	0.528346	-0.300222	-0.0580552
-0.446793	0.472238	-0.129984	0.0826611	0.434129	-0.673657	0.762747	-0.559195	0.946474	-0.292401	0.0809164	1.47309	0.364915	0.0276384	1.0471	0.702575	-0.201961	-0.123735	-0.395928	-0.571083	0.029171	1.7531	0.562894	0.0266783	-0.581703	-0.16047	0.253019	0.399362	0.321253	0.721269	1.54242	0.751134	-0.0150787	-0.28077	0.0110341	-0.0968266	0.670396	0.0387361	0.086202	-0.304194	-0.119464	-0.0954668	-0.0553913	0.0617601	-0.407247	-0.309782	0.0996473	0.531863	-0.234453	-0.0352885
-0.434534	0.473245	-0.131742	0.0543202	0.471473	-0.699384	0.760586	-0.536639	0.981082	-0.252656	0.100938	1.42455	0.382781	0.0364707	1.07191	0.696366	-0.244646	-0.108533	-0.402421	-0.537923	-0.00856249	1.73973	0.461549	-0.000595505	-0.590694	-0.257467	0.17986	0.422693	0.275992	0.734368	1.47482	0.697653	-0.00357141	-0.339119	-0.0149193	-0.0889737	0.723537	0.0806242	0.00775269	-0.334144	-0.12533	-0.111036	-0.0857332	-0.0943794	-0.401384	-0.282028	0.00885769	0.506221	-0.252642	-0.0552054
-0.40651	0.476689	-0.121265	0.0443767	0.45639	-0.731822	0.749616	-0.503564	1.02494	-0.215439	0.0954154	1.38282	0.407581	0.0513679	1.08388	0.649714	-0.275517	-0.109654	-0.36664	-0.536203	-0.0481122	1.74259	0.348582	-0.00101316	-0.574357	-0.259172	0.187937	0.453386	0.22968	0.755869	1.48733	0.656427	-0.00999884	-0.270616	-0.123667	-0.142647	0.726096	0.0115084	-0.00947342	-0.374199	-0.10164	-0.0838615	-0.114144	-0.131483	-0.399348	-0.256283	-0.00843546	0.501049	-0.238607	-0.021517
-0.416815	0.478429	-0.119825	0.0568243	0.461505	-0.752014	0.712448	-0.526085	1.03814	-0.176478	0.0902507	1.36795	0.418331	0.0353962	1.08247	0.599653	-0.317948	-0.0480737	-0.305868	-0.481953	-0.0361161	1.72207	0.264513	0.0333061	-0.55601	-0.2361	0.169244	0.453235	0.213662	0.742526	1.48305	0.604627	-0.100885	-0.263474	-0.160773	-0.172087	0.676014	-0.0410393	-0.00027498	-0.386232	-0.127154	-0.0778541	-0.167367	-0.137586	-0.450741	-0.290405	0.0318422	0.513944	-0.290281	-0.0347066
-0.425128	0.476616	-0.117624	0.0542744	0.458962	-0.734583	0.696959	-0.517747	1.0157	-0.168892	0.120485	1.35166	0.42974	0.022726	1.0527	0.560612	-0.352462	0.0119303	-0.259811	-0.480524	-0.0522527	1.69674	0.194255	0.0807597	-0.549382	-0.273587	0.181541	0.440867	0.201201	0.733378	1.53451	0.567159	-0.210965	-0.298458	-0.0876692	-0.154848	0.672961	-0.0652506	0.0139525	-0.396546	-0.103217	-0.0511733	-0.237588	-0.00352276	-0.473049	-0.350825	0.0608504	0.524577	-0.292872	-0.0235575
-0.48116	0.488269	-0.115793	0.065098	0.476714	-0.761136	0.675359	-0.502614	1.00672	-0.146576	0.109308	1.41567	0.453276	0.0400183	1.00796	0.511402	-0.369704	0.0392627	-0.241178	-0.44571	-0.0638633	1.69031	0.217406	0.119271	-0.555387	-0.357694	0.131037	0.455568	0.162488	0.734981	1.51489	0.520587	-0.290197	-0.332728	-0.0483532	-0.116501	0.671457	-0.0350234	0.0365564	-0.356311	-0.121876	-0.0900169	-0.325985	-0.0222289	-0.466551	-0.358917	0.098538	0.552554	-0.252983	-0.0108808
-0.442314	0.496758	-0.114499	0.0442978	0.51691	-0.730838	0.6506	-0.43436	0.987251	-0.161507	0.138575	1.41254	0.478435	0.0715214	0.968016	0.465186	-0.362799	-0.0342398	-0.271222	-0.39788	-0.071504	1.68251	0.263899	0.125321	-0.570261	-0.400048	0.0960025	0.476945	0.147615	0.749139	1.5285	0.493464	-0.247343	-0.288396	0.0147401	-0.0851869	0.690126	-0.013899	0.126258	-0.307433	-0.126032	-0.131485	-0.351158	-0.0721187	-0.419643	-0.319912	0.0682762	0.507391	-0.256169	-0.0241099
-0.428945	0.495435	-0.113946	0.0727515	0.541288	-0.720938	0.669934	-0.406498	0.986141	-0.137971	0.115347	1.39664	0.505161	0.0918964	0.974172	0.428296	-0.354134	-0.0792209	-0.297207	-0.370733	-0.0816962	1.66374	0.341942	0.0908726	-0.561109	-0.389937	0.128198	0.548482	0.205814	0.738983	1.48023	0.445893	-0.149696	-0.164333	0.0224835	-0.121973	0.646659	-0.000573176	0.192701	-0.261223	-0.159999	-0.169341	-0.304524	-0.0849488	-0.392555	-0.282877	0.0520822	0.477178	-0.268372	-0.0262897
-0.400697	0.45944	-0.10571	0.077824	0.569366	-0.685014	0.639981	-0.432268	0.94998	-0.120271	0.13226	1.31107	0.535913	0.091064	0.999597	0.395239	-0.379064	-0.145023	-0.305429	-0.276407	-0.0680333	1.62478	0.300019	0.0216777	-0.522759	-0.301525	0.109093	0.590629	0.223492	0.726449	1.49147	0.42607	-0.0910597	-0.173497	0.091797	-0.060809	0.667899	-0.0319704	0.215727	-0.235223	-0.170319	-0.148678	-0.289265	-0.0646358	-0.378023	-0.258248	-0.0829605	0.394853	-0.337174	-0.0454405
-0.395498	0.435943	-0.104878	0.0743624	0.608886	-0.682774	0.662695	-0.377128	0.963764	-0.0893682	0.113025	1.24884	0.555972	0.0645184	1.0055	0.363236	-0.382843	-0.103661	-0.340027	-0.199626	-0.103847	1.61033	0.30346	-0.0211273	-0.481895	-0.281198	0.0977356	0.59771	0.22724	0.700815	1.50651	0.42101	-0.129185	-0.144173	0.10201	-0.01365	0.676554	-0.109969	0.199856	-0.213578	-0.153675	-0.103058	-0.185785	0.0311976	-0.356554	-0.276423	-0.16572	0.426215	-0.299434	-0.00734479
-0.354879	0.423824	-0.105792	0.0712659	0.618723	-0.679706	0.68507	-0.334173	0.950222	-0.0815225	0.0939598	1.28383	0.587175	0.0365254	1.00398	0.318111	-0.373224	-0.105096	-0.325993	-0.210816	-0.106897	1.59954	0.280599	0.0334198	-0.395972	-0.216595	0.0622698	0.559068	0.233079	0.74553	1.53675	0.430059	-0.181273	-0.227702	0.111159	0.0804805	0.717257	-0.120896	0.22537	-0.194641	-0.177875	-0.0242172	-0.216497	-0.0313423	-0.309115	-0.257695	-0.248227	0.490257	-0.259952	0.0349711
-0.313606	0.424149	-0.120682	0.0358597	0.611045	-0.676595	0.744994	-0.336157	0.974494	-0.0665121	0.0706576	1.28409	0.610883	0.0237496	0.998657	0.284526	-0.289296	-0.0804693	-0.339038	-0.263652	-0.14101	1.58785	0.310796	0.105108	-0.264311	-0.277409	0.0749878	0.532284	0.234895	0.755342	1.54146	0.451603	-0.175135	-0.0704653	-0.0226854	0.030199	0.726058	-0.104742	0.30944	-0.108617	-0.176902	0.0417868	-0.148768	-0.0506577	-0.275755	-0.203483	-0.26671	0.576482	-0.182549	-0.0589882
-0.295471	0.419342	-0.130045	0.00647011	0.600525	-0.677727	0.770918	-0.410291	0.960421	-0.0477738	0.0496106	1.25638	0.637067	0.0307589	0.986214	0.270892	-0.272366	-0.0423467	-0.33778	-0.357672	-0.162906	1.57434	0.25588	0.0803169	-0.202731	-0.268568	0.0634878	0.563135	0.215951	0.768309	1.49537	0.394939	-0.0919566	-0.162586	-0.107246	0.0613308	0.756532	-0.112588	0.379499	-0.0935178	-0.144125	0.106094	-0.20142	-0.0176462	-0.263623	-0.198	-0.368805	0.584913	-0.215387	-0.102791
-0.312462	0.427651	-0.137147	-0.018039	0.620336	-0.66554	0.72585	-0.44805	0.959237	-0.0215596	0.0429917	1.16875	0.679871	0.0518442	0.956127	0.240814	-0.239516	-0.0320797	-0.359168	-0.338039	-0.178204	1.59176	0.273229	0.0293307	-0.160483	-0.305382	0.0195796	0.577598	0.154979	0.714322	1.52214	0.380097	-0.0610103	-0.035863	-0.173426	0.0267299	0.787901	-0.0603632	0.361621	-0.0635035	-0.0773093	0.0992767	-0.143897	0.0318751	-0.229921	-0.206847	-0.404412	0.574697	-0.230469	-0.229224
-0.352878	0.426345	-0.134469	-0.00137676	0.603631	-0.652142	0.669641	-0.36983	0.937061	-0.0225725	0.0172591	1.12654	0.703476	0.0238377	0.942501	0.227009	-0.266255	0.00725009	-0.377988	-0.245195	-0.175029	1.5991	0.344105	-0.0146074	-0.152519	-0.290163	-0.00739806	0.586506	0.095762	0.68654	1.50822	0.348647	0.00509668	-0.134558	-0.141443	0.0439663	0.802882	-0.111847	0.310219	-0.109736	-0.0588165	0.0500442	-0.139061	0.0424035	-0.209643	-0.258197	-0.449284	0.532398	-0.241316	-0.209883
-0.416985	0.429686	-0.143003	0.02	0.601159	-0.626131	0.649942	-0.353238	0.957319	-0.0128559	-0.00464741	1.14115	0.717712	0.0147237	0.940291	0.201637	-0.254953	-0.00734639	-0.352586	-0.237325	-0.162647	1.59198	0.384658	-0.00451435	-0.129169	-0.246507	-0.0227369	0.555584	0.0750271	0.618432	1.48121	0.373292	0.0232402	-0.0186986	-0.154902	0.0132017	0.816094	-0.0991305	0.178044	-0.0705093	-0.0704875	-0.0124796	-0.100628	-0.0854787	-0.183931	-0.206715	-0.362678	0.487456	-0.205005	-0.238991
-0.437205	0.433811	-0.133072	0.0351118	0.596094	-0.60325	0.649714	-0.352959	1.01067	0.0131879	-0.0238296	1.18542	0.717598	0.0118324	0.955058	0.233355	-0.237884	0.00219718	-0.354117	-0.209299	-0.155129	1.57256	0.417894	0.00314126	-0.128223	-0.183952	-0.0555978	0.581844	0.0824344	0.626369	1.48902	0.373807	0.142669	-0.060339	-0.139696	0.0386844	0.843996	-0.0501694	0.121222	-0.0492584	-0.111459	-0.0322464	-0.0432899	-0.150326	-0.185789	-0.157766	-0.413477	0.426098	-0.169552	-0.248411
-0.417258	0.433792	-0.149743	0.0331495	0.592681	-0.553095	0.656725	-0.318709	0.994753	0.0303073	-0.0591132	1.142	0.715527	0.0209479	0.913534	0.201447	-0.205557	0.00197175	-0.384029	-0.294943	-0.149672	1.53466	0.433267	-0.00984369	-0.10768	-0.142245	-0.0687365	0.480785	0.0678084	0.618702	1.43489	0.37881	0.0433017	-0.0428616	-0.146175	0.0951842	0.910784	-0.0548545	-0.0220614	0.0409127	-0.0751919	-0.00963235	0.00827075	-0.112047	-0.266868	-0.128586	-0.4622	0.385823	-0.171935	-0.2565
-0.377384	0.447646	-0.123491	0.0385071	0.59027	-0.530241	0.612598	-0.322418	0.998899	0.0533018	-0.091675	1.2048	0.740537	0.0305859	0.902472	0.230744	-0.173777	0.046354	-0.435907	-0.258864	-0.178507	1.5073	0.476556	0.00935721	-0.0636245	-0.225698	-0.106197	0.517572	0.106865	0.641978	1.46071	0.366868	0.0456727	-0.0573347	-0.0423081	0.113569	0.927501	-0.0654547	0.050711	0.0557589	-0.124706	0.0638077	0.0143124	-0.034462	-0.263599	-0.126403	-0.532646	0.35807	-0.175679	-0.326555
-0.41252	0.429989	-0.120217	0.00208737	0.590188	-0.509236	0.638617	-0.275115	0.960854	0.0457635	-0.122778	1.15801	0.752789	0.0389903	0.89661	0.233232	-0.170416	0.0761619	-0.467414	-0.332207	-0.223433	1.49444	0.487675	0.0253365	-0.0438248	-0.276921	-0.0793623	0.499588	0.0816989	0.631585	1.42622	0.346836	-0.0161085	-0.0558757	0.00818957	0.146505	0.990328	-0.160305	0.0842559	0.0746582	-0.104519	0.116624	-0.0313331	0.0306166	-0.305067	-0.155515	-0.513075	0.347944	-0.175721	-0.276024
-0.462442	0.455523	-0.116132	-0.0216849	0.621079	-0.520899	0.683835	-0.327697	0.999482	0.0663042	-0.134228	1.11794	0.772634	0.0431631	0.895281	0.260219	-0.176032	0.0395144	-0.460261	-0.349993	-0.267176	1.52201	0.503609	0.0513702	-0.0570976	-0.379106	-0.0424118	0.579418	0.0735947	0.631364	1.42604	0.340344	0.0129467	-0.0437711	0.0697068	0.145589	1.01484	-0.198145	0.214006	0.0393556	-0.166817	0.0826885	-0.109162	0.033151	-0.230545	-0.136189	-0.493281	0.350405	-0.151911	-0.276295
-0.523311	0.454424	-0.126553	-0.0271248	0.602129	-0.535849	0.706875	-0.319286	0.993952	0.0764595	-0.174319	1.0431	0.777198	0.0222424	0.880352	0.240162	-0.147402	-0.0194802	-0.422058	-0.312314	-0.277805	1.55485	0.495232	0.0846108	-0.0526636	-0.314261	-0.00494618	0.507792	0.017974	0.657852	1.40649	0.353992	-0.0871328	0.00934975	0.0179381	0.102095	1.07106	-0.215544	0.152203	0.0625771	-0.164598	0.0994333	-0.134951	-0.00423116	-0.219378	-0.123701	-0.554432	0.358759	-0.110128	-0.269851
-0.525567	0.44286	-0.139821	-0.00293326	0.579764	-0.576862	0.697389	-0.380968	1.0167	0.0977089	-0.172284	0.98223	0.805758	0.00635817	0.900588	0.213542	-0.139152	-0.101454	-0.401807	-0.221695	-0.241374	1.58325	0.53487	0.0928424	-0.11095	-0.369979	-0.047913	0.503681	0.0333643	0.640879	1.32022	0.36325	-0.126625	-0.00352702	-0.0153789	0.0675719	1.0058	-0.292872	0.111429	0.0906144	-0.177372	0.102614	-0.197128	-0.0434862	-0.179797	-0.109051	-0.564337	0.355086	-0.0973057	-0.281053
-0.506534	0.410517	-0.14901	-0.0108087	0.574341	-0.596862	0.682406	-0.314544	1.01091	0.0838342	-0.174129	0.983581	0.821407	-0.0289087	0.883356	0.117435	-0.105607	-0.120683	-0.372986	-0.215914	-0.260343	1.587	0.572345	0.110651	-0.158521	-0.326314	-0.0561674	0.456891	0.0342415	0.626249	1.31727	0.382564	-0.17125	0.00692305	-0.100583	0.0357145	0.980172	-0.277075	0.0311531	0.0993909	-0.122726	0.0989451	-0.221665	-0.0627155	-0.10332	-0.135577	-0.531084	0.354398	-0.106528	-0.311665
-0.513732	0.389827	-0.157168	-0.026703	0.571572	-0.600194	0.700979	-0.339748	0.996418	0.0923826	-0.156573	0.936113	0.867478	-0.0219352	0.89726	0.0679307	-0.107395	-0.113906	-0.395855	-0.314574	-0.251648	1.60598	0.62418	0.0703458	-0.253747	-0.332777	-0.106305	0.500525	0.0776414	0.595375	1.29301	0.415368	-0.187913	-0.0883293	-0.125856	0.0555967	0.929907	-0.263035	0.0320981	0.0379114	-0.0717423	0.0600435	-0.236326	-0.0574623	-0.098358	-0.17039	-0.456491	0.353122	-0.124353	-0.299592
-0.506565	0.411012	-0.16204	-0.0653692	0.551419	-0.605792	0.698891	-0.328181	0.985111	0.0986691	-0.19019	0.958451	0.89866	-0.00543251	0.866525	0.00942917	-0.100511	-0.120647	-0.385596	-0.404954	-0.253178	1.59952	0.567272	0.0790783	-0.238779	-0.395161	-0.110604	0.491106	0.101386	0.595071	1.27355	0.456929	-0.23418	-0.106808	-0.144375	0.0884885	0.921458	-0.145707	0.00112315	-0.0283258	-0.0822554	0.0698535	-0.16821	-0.033711	-0.105225	-0.17396	-0.485744	0.336516	-0.130358	-0.407365
-0.51085	0.418634	-0.152158	-0.0797045	0.556066	-0.589745	0.708421	-0.374692	0.984627	0.120941	-0.224785	0.892806	0.935031	0.0321489	0.879228	0.0799983	-0.11338	-0.137081	-0.395955	-0.462289	-0.222061	1.60661	0.452461	0.0639634	-0.285242	-0.484404	-0.177735	0.552786	0.103451	0.587153	1.21757	0.452432	-0.249399	-0.198013	-0.122631	0.0847806	0.854702	-0.165608	0.0392242	-0.0725868	-0.137214	0.0756227	-0.126614	0.00213503	-0.144608	-0.186687	-0.526391	0.330609	-0.107643	-0.399419
-0.507883	0.396109	-0.16108	-0.0506237	0.568758	-0.60755	0.690624	-0.331058	0.956779	0.113987	-0.237904	0.880502	0.952314	0.0317575	0.854748	0.0693691	-0.123299	-0.160382	-0.360556	-0.434372	-0.210515	1.58318	0.442963	0.161095	-0.315086	-0.581391	-0.217226	0.532443	0.0828819	0.553222	1.16424	0.428594	-0.216961	-0.183282	-0.145272	0.0377349	0.868425	-0.157115	0.0844665	-0.0599384	-0.252551	0.0451792	-0.0863086	-0.077928	-0.122872	-0.172948	-0.551184	0.310357	-0.0893704	-0.386633
-0.466129	0.388692	-0.150859	-0.0215597	0.600259	-0.573285	0.687333	-0.264821	0.9292	0.111144	-0.246846	0.828803	0.967402	0.0266752	0.833901	0.0899137	-0.116277	-0.135308	-0.348249	-0.416275	-0.191565	1.57169	0.422121	0.151007	-0.337546	-0.517125	-0.262763	0.497005	0.107806	0.561889	1.14513	0.391676	-0.207801	-0.202724	-0.266766	-0.0298931	0.905592	-0.202105	0.121178	-0.0957373	-0.289314	0.00766863	-0.108155	-0.140337	-0.0555299	-0.192554	-0.588344	0.284767	-0.081905	-0.363172
-0.405369	0.411283	-0.157122	0.00878238	0.587455	-0.589409	0.693315	-0.219999	0.934005	0.107409	-0.222913	0.85433	1.00092	0.00516244	0.829621	0.00327111	-0.0629953	-0.0821773	-0.343778	-0.403537	-0.169229	1.54515	0.393691	0.179838	-0.285457	-0.509048	-0.2944	0.450611	0.164767	0.550222	1.11826	0.381271	-0.169064	-0.0896294	-0.229029	-0.0942264	0.964607	-0.16867	0.187256	-0.0734587	-0.270961	0.0152435	-0.106108	-0.278534	-0.0624429	-0.192151	-0.609156	0.283768	-0.0652876	-0.413525
-0.359305	0.42672	-0.155934	0.0285232	0.584829	-0.554869	0.680445	-0.213599	0.945121	0.101194	-0.215071	0.817648	1.0253	-0.00291202	0.840237	-0.0221095	-0.08938	-0.115691	-0.358075	-0.386125	-0.148847	1.5117	0.259986	0.129857	-0.297025	-0.547716	-0.335281	0.463484	0.172897	0.572429	1.08541	0.306551	-0.107642	-0.138723	-0.212204	-0.11072	0.948169	-0.19351	0.189101	-0.0984115	-0.22712	0.0165512	-0.191482	-0.295574	-0.0559832	-0.237691	-0.712167	0.24717	-0.103886	-0.390156
-0.337067	0.426037	-0.178226	0.0470526	0.593164	-0.565299	0.64545	-0.234859	0.934397	0.101984	-0.231878	0.831529	1.03013	-0.0169222	0.828157	-0.0456772	-0.105842	-0.180081	-0.360302	-0.369684	-0.158112	1.45986	0.190135	0.162451	-0.342859	-0.511015	-0.373785	0.483063	0.150206	0.559199	1.10545	0.27115	-0.129688	-0.182196	-0.167113	-0.0908398	0.964186	-0.23796	0.234656	-0.067399	-0.249696	-0.0424313	-0.210448	-0.281299	-0.0785606	-0.232854	-0.715809	0.239855	-0.103034	-0.31406
-0.336761	0.417836	-0.18487	0.0808326	0.58249	-0.547795	0.586718	-0.238342	0.893842	0.11055	-0.262507	0.808123	1.00874	-0.0104982	0.816941	-0.0203672	-0.148297	-0.27667	-0.354808	-0.198453	-0.105465	1.43348	0.206237	0.21332	-0.341597	-0.511929	-0.396162	0.448743	0.118758	0.554745	1.10454	0.237933	-0.164166	-0.194122	-0.249243	-0.052059	0.996085	-0.258651	0.15058	-0.0411479	-0.286794	-0.0518309	-0.16364	-0.176163	-0.150527	-0.227756	-0.74337	0.230442	-0.0973449	-0.273192
-0.315336	0.419319	-0.191751	0.0312896	0.589048	-0.558825	0.611996	-0.189936	0.878736	0.121239	-0.283745	0.789584	0.985798	-0.0248161	0.784665	0.027336	-0.164582	-0.305146	-0.325823	-0.165354	-0.103216	1.42618	0.210162	0.184048	-0.349082	-0.423476	-0.432609	0.418285	0.0765723	0.547191	1.14426	0.247182	-0.209669	-0.275769	-0.280686	0.00724334	0.951755	-0.236705	0.153596	-0.0392109	-0.233363	-0.0630518	-0.0978226	-0.0554198	-0.207245	-0.255185	-0.716085	0.25516	-0.0584844	-0.258272
-0.309139	0.414545	-0.179392	-0.00141204	0.586542	-0.528609	0.645615	-0.18481	0.889844	0.105026	-0.267328	0.764445	0.983537	-0.0365647	0.763936	0.011974	-0.205315	-0.274417	-0.321447	-0.143934	-0.0930414	1.41288	0.222356	0.142931	-0.387631	-0.511509	-0.422486	0.392045	0.00900526	0.477385	1.15656	0.281344	-0.262432	-0.296068	-0.279548	0.0297073	0.891591	-0.163034	0.171087	-0.0475259	-0.171731	-0.0442994	-0.085125	0.0705471	-0.242945	-0.328522	-0.689228	0.271738	-0.0451531	-0.252376
-0.315436	0.402253	-0.174212	-0.01364	0.613214	-0.517741	0.642002	-0.240882	0.839966	0.0949628	-0.278578	0.776347	1.00515	-0.0437082	0.744677	0.00588021	-0.260445	-0.292364	-0.29556	-0.155519	-0.117648	1.3618	0.237593	0.0919197	-0.469995	-0.467681	-0.48473	0.4464	-0.00777576	0.455946	1.17909	0.276571	-0.274965	-0.347335	-0.320588	0.0196492	0.852245	-0.0928592	0.266375	-0.119285	-0.157161	-0.0453921	-0.104087	0.0845704	-0.171021	-0.371499	-0.722084	0.251262	-0.0597599	-0.186647
-0.302416	0.395483	-0.185668	0.029592	0.632577	-0.515471	0.610282	-0.263301	0.818135	0.0737284	-0.296982	0.803563	1.02206	-0.023576	0.712509	-0.0683319	-0.236182	-0.259574	-0.302637	-0.101676	-0.176318	1.30676	0.245989	0.141069	-0.423654	-0.467801	-0.48955	0.452336	0.0520619	0.377669	1.17252	0.280479	-0.260369	-0.13538	-0.297395	-0.0688953	0.942617	-0.0589735	0.24812	-0.116708	-0.198719	-0.029281	-0.0480352	0.0545003	-0.107483	-0.340122	-0.694236	0.251445	-0.0457143	-0.194499
-0.323008	0.377376	-0.209643	0.0713909	0.634209	-0.539652	0.614661	-0.149343	0.768671	0.0563414	-0.314891	0.841554	1.04259	-0.011698	0.680745	-0.119898	-0.201163	-0.273267	-0.284266	-0.0583261	-0.188096	1.28032	0.232595	0.172335	-0.403591	-0.354102	-0.531302	0.44005	0.15353	0.37882	1.15331	0.251164	-0.204069	-0.0536601	-0.272085	-0.136916	1.00293	-0.0143573	0.330064	-0.143982	-0.208216	0.0150393	-0.0228085	-0.030906	-0.115425	-0.287693	-0.74455	0.224402	-0.054448	-0.166383
-0.330999	0.354555	-0.214216	0.0764271	0.627919	-0.544307	0.633345	-0.107546	0.785848	0.0701098	-0.326268	0.834106	1.05926	0.0196346	0.66027	-0.139888	-0.189731	-0.180785	-0.307047	-0.0394004	-0.204548	1.26217	0.225727	0.171812	-0.421035	-0.350208	-0.550667	0.413601	0.187571	0.363633	1.15533	0.239576	-0.18389	-0.0122217	-0.141959	-0.179818	1.01429	0.0267898	0.266361	-0.131081	-0.128094	-0.000978297	-0.0207482	-0.115398	-0.143591	-0.273043	-0.724684	0.21036	-0.0716713	-0.120974
-0.344494	0.341385	-0.215579	0.0674545	0.578717	-0.529447	0.639193	-0.0632459	0.772108	0.0725395	-0.333893	0.771112	1.0699	0.0172475	0.643328	-0.180974	-0.196828	-0.134068	-0.32062	-0.035433	-0.128704	1.25154	0.214835	0.113596	-0.436262	-0.371903	-0.549764	0.376096	0.231012	0.402552	1.13749	0.235833	-0.208539	-0.0698036	-0.18955	-0.17883	0.900132	-0.0292308	0.290606	-0.142059	-0.0464588	0.0142649	-0.044091	-0.103993	-0.220354	-0.268804	-0.799268	0.187768	-0.0994585	-0.077
-0.296553	0.336263	-0.200401	0.0487357	0.585245	-0.518535	0.602481	-0.152098	0.774984	0.106625	-0.36598	0.665573	1.06734	0.0276094	0.669849	-0.155512	-0.213468	-0.0916681	-0.401474	-0.0698207	-0.0850486	1.2258	0.187103	0.0513771	-0.426841	-0.369297	-0.552239	0.387973	0.241495	0.423783	1.12482	0.233255	-0.277826	-0.0753734	-0.173546	-0.190742	0.769739	-0.103021	0.214481	-0.125904	0.053626	0.00588551	-0.0660387	-0.131083	-0.21498	-0.284887	-0.844549	0.18199	-0.110587	-0.043491
-0.272464	0.34493	-0.203903	0.0341315	0.596207	-0.492753	0.56523	-0.115581	0.776545	0.102723	-0.394485	0.581763	1.08604	0.00933065	0.681139	-0.17139	-0.17777	-0.131133	-0.414428	-0.107924	-0.0744535	1.21772	0.129481	0.0216402	-0.401113	-0.415836	-0.520344	0.453	0.298015	0.387661	1.15755	0.268939	-0.302771	-0.0567428	-0.258209	-0.171642	0.651482	-0.228006	0.191728	-0.106796	0.0616117	0.00909051	-0.0946723	-0.0689192	-0.211265	-0.282081	-0.839603	0.200001	-0.114183	-0.0541262
-0.232644	0.361564	-0.182977	0.0558248	0.639133	-0.483569	0.567931	-0.117091	0.811957	0.114998	-0.406547	0.519949	1.10083	0.0150018	0.706224	-0.160139	-0.149331	-0.12589	-0.438351	-0.129011	-0.124544	1.19376	0.0544988	0.00804851	-0.426504	-0.379784	-0.492359	0.509091	0.277124	0.349853	1.21696	0.256951	-0.299183	-0.00354648	-0.243543	-0.17214	0.676774	-0.20038	0.272514	-0.0979507	0.107145	-0.0446233	-0.108914	-0.0816321	-0.151818	-0.318878	-0.785864	0.204978	-0.130189	-0.0266823
-0.233864	0.399053	-0.193985	0.0721596	0.603365	-0.434814	0.549036	-0.13713	0.839691	0.103471	-0.398886	0.487275	1.12271	0.032318	0.708779	-0.193578	-0.116791	-0.106031	-0.436303	-0.0498452	-0.142767	1.15838	0.087773	-0.00171788	-0.411451	-0.470544	-0.50123	0.503195	0.29432	0.259872	1.2678	0.222409	-0.212464	0.0559664	-0.171926	-0.157306	0.725295	-0.186546	0.216322	-0.083539	0.0607631	-0.120998	-0.0679007	0.00530777	-0.191058	-0.336898	-0.670027	0.199015	-0.113972	-0.00612424
-0.229448	0.415637	-0.205382	0.0924807	0.593971	-0.432402	0.538012	-0.135881	0.84392	0.0934284	-0.369923	0.482908	1.1111	0.0460807	0.720851	-0.218298	-0.152797	-0.0882541	-0.438879	-0.0972995	-0.1584	1.1132	0.124834	-0.0255915	-0.474266	-0.354291	-0.549969	0.428656	0.31351	0.280867	1.27654	0.141823	-0.218902	-0.0322014	-0.210251	-0.151737	0.749867	-0.106371	0.31341	-0.104149	0.0648551	-0.0818026	-0.0357651	0.0411126	-0.194725	-0.385907	-0.703976	0.179622	-0.10619	0.0290615
-0.267339	0.40792	-0.219537	0.108891	0.59541	-0.353473	0.49761	-0.12884	0.831893	0.0740467	-0.380545	0.513835	1.11671	0.0485411	0.695167	-0.232224	-0.210964	-0.102044	-0.413686	-0.118436	-0.148209	1.08612	0.262252	-0.00119074	-0.505821	-0.363393	-0.627409	0.377487	0.33608	0.268436	1.27479	0.084878	-0.15598	-0.152963	-0.203095	-0.100942	0.794072	-0.0618997	0.226937	-0.101754	0.0243744	-0.060608	-0.050147	0.0905142	-0.243134	-0.390841	-0.698213	0.156506	-0.0980194	0.0471152
-0.29292	0.395289	-0.214732	0.131229	0.658877	-0.319648	0.483934	-0.0592785	0.834141	0.0797738	-0.380074	0.530239	1.13238	0.0505454	0.679496	-0.219992	-0.261327	-0.152486	-0.356544	-0.172137	-0.15719	1.05912	0.321523	0.0281292	-0.517904	-0.265788	-0.659015	0.386498	0.305806	0.287157	1.27236	0.0934171	-0.205874	-0.186934	-0.323181	-0.0756892	0.78715	-0.153753	0.324127	-0.0887979	0.123062	-0.0284661	-0.0296593	0.11474	-0.199599	-0.399559	-0.718845	0.163586	-0.0800825	0.115515
-0.269269	0.375938	-0.212917	0.168323	0.666934	-0.268102	0.437954	-0.0309875	0.826579	0.0848547	-0.427287	0.569618	1.1624	0.0731849	0.641152	-0.230913	-0.291672	-0.167634	-0.352115	-0.0854324	-0.159107	1.06472	0.33576	0.0793961	-0.447918	-0.309145	-0.672097	0.392053	0.266206	0.238225	1.30448	0.0879801	-0.170035	-0.223505	-0.280761	-0.0421559	0.833348	-0.189517	0.262793	-0.0938403	0.153461	-0.0628969	-0.0702868	0.109536	-0.213958	-0.424155	-0.706375	0.150556	-0.0585284	0.20798
-0.273452	0.370905	-0.221542	0.172356	0.649492	-0.281921	0.431328	-0.0372372	0.817337	0.094687	-0.445448	0.546757	1.19129	0.0621778	0.643249	-0.233891	-0.309677	-0.21628	-0.357891	-0.0325663	-0.149104	1.08873	0.288056	0.104444	-0.386563	-0.300227	-0.693277	0.383307	0.229513	0.247549	1.28515	0.128141	-0.237953	-0.202315	-0.306413	-0.0449065	0.756692	-0.275814	0.258394	-0.0924948	0.242649	-0.0859976	-0.133719	0.0706666	-0.199274	-0.462311	-0.686965	0.177459	-0.023956	0.287953
-0.299862	0.352069	-0.217772	0.193711	0.602321	-0.277207	0.409129	-0.0922581	0.825345	0.100857	-0.437401	0.618834	1.22543	0.0654706	0.638808	-0.247837	-0.32391	-0.219271	-0.359201	0.000307441	-0.178419	1.13857	0.320135	0.12513	-0.332987	-0.336422	-0.735973	0.413744	0.254291	0.200935	1.2506	0.137935	-0.222783	-0.208471	-0.380787	-0.0750088	0.731719	-0.20451	0.194184	-0.130018	0.229447	-0.10642	-0.203922	0.0709448	-0.143582	-0.455596	-0.679159	0.146002	-0.0305679	0.316063
-0.362841	0.345237	-0.217153	0.167501	0.636533	-0.266028	0.467338	-0.0491843	0.837132	0.0731416	-0.41499	0.596009	1.23046	0.0248634	0.649942	-0.259881	-0.321222	-0.226283	-0.334706	-0.0733075	-0.244524	1.1745	0.443417	0.143988	-0.328226	-0.202581	-0.76548	0.402114	0.23165	0.208036	1.25874	0.153227	-0.243368	-0.170056	-0.461374	-0.0557039	0.629651	-0.267385	0.211567	-0.137018	0.201439	-0.0996623	-0.250665	0.0279753	-0.12956	-0.488839	-0.707632	0.155759	-0.0327806	0.260108
-0.359853	0.349114	-0.197097	0.140825	0.677493	-0.274697	0.49034	-0.112315	0.849408	0.105868	-0.416692	0.565408	1.24158	0.0495698	0.670364	-0.255903	-0.318218	-0.249694	-0.327127	-0.153678	-0.3057	1.19398	0.596957	0.107882	-0.304721	-0.176448	-0.79082	0.460267	0.256325	0.137674	1.2358	0.152284	-0.184318	-0.116361	-0.432743	-0.0196571	0.561753	-0.249935	0.166148	-0.156658	0.152962	-0.0759297	-0.21963	0.071294	-0.107167	-0.472308	-0.743739	0.129143	-0.0175228	0.226963
-0.372024	0.35241	-0.209666	0.168384	0.710268	-0.307807	0.525244	-0.121028	0.843058	0.105297	-0.454052	0.483628	1.22523	0.0422262	0.693988	-0.237384	-0.305434	-0.291535	-0.334118	-0.215761	-0.33737	1.21216	0.665958	0.146505	-0.27947	-0.152565	-0.796604	0.422076	0.262916	0.126589	1.28202	0.184765	-0.168566	-0.129566	-0.378895	0.0598047	0.572946	-0.212785	0.191036	-0.166443	0.10492	-0.0722391	-0.221417	-0.0349599	-0.175599	-0.508697	-0.735207	0.146573	0.0167831	0.144785
-0.375771	0.344987	-0.195675	0.195684	0.719567	-0.324885	0.498782	-0.165314	0.868967	0.151883	-0.451178	0.424778	1.23593	0.0616491	0.707695	-0.214142	-0.26903	-0.346604	-0.340366	-0.216834	-0.332439	1.23812	0.67117	0.170584	-0.207824	-0.270288	-0.799061	0.434733	0.241959	0.0522661	1.22149	0.278292	-0.213252	-0.0284909	-0.34571	0.0288443	0.689119	-0.171684	0.154548	-0.16712	0.126585	-0.15877	-0.207886	-0.0849393	-0.178016	-0.480661	-0.641821	0.15932	0.0488097	0.0710492
-0.355398	0.348032	-0.21028	0.24756	0.724008	-0.329293	0.47472	-0.0854545	0.917793	0.154885	-0.445505	0.40732	1.24584	0.0574727	0.740932	-0.232161	-0.257105	-0.36773	-0.303764	-0.210493	-0.30048	1.24096	0.650822	0.206691	-0.181333	-0.358577	-0.759708	0.396482	0.229574	0.0382635	1.2519	0.322957	-0.331798	-0.0603311	-0.403576	0.0112237	0.810553	-0.173204	0.176309	-0.186877	0.129202	-0.270918	-0.220514	-0.158534	-0.116116	-0.508322	-0.620562	0.128055	-0.0114183	-0.00487901
-0.292447	0.351417	-0.210737	0.217483	0.74767	-0.318213	0.437204	-0.0117872	0.936902	0.17079	-0.458079	0.434694	1.25588	0.0440508	0.727533	-0.281785	-0.24798	-0.357751	-0.263452	-0.16275	-0.282885	1.2689	0.622913	0.152087	-0.136697	-0.43241	-0.774535	0.402837	0.171066	0.0436575	1.18562	0.309184	-0.364033	-0.063976	-0.364071	0.000619958	0.864885	-0.225748	0.125959	-0.212458	0.140004	-0.317414	-0.168202	-0.159742	-0.0911416	-0.492646	-0.656586	0.101124	-0.0549608	-0.0327894
-0.237889	0.352803	-0.205008	0.237853	0.720948	-0.33352	0.430812	0.0160009	0.935804	0.167946	-0.458068	0.513718	1.26279	0.0253678	0.714459	-0.29054	-0.278311	-0.317902	-0.229263	-0.169019	-0.255794	1.2981	0.540744	0.0996227	-0.128888	-0.438203	-0.818011	0.387185	0.200071	0.0369468	1.1732	0.242139	-0.344852	-0.144316	-0.383664	0.0180007	0.941464	-0.246209	0.133608	-0.252555	0.142813	-0.257579	-0.171628	-0.159947	-0.0567858	-0.533882	-0.704336	0.0270395	-0.0916965	0.00874368
-0.226095	0.346818	-0.204647	0.220856	0.708733	-0.325562	0.449429	-0.0136095	0.896414	0.16072	-0.422718	0.573039	1.25847	0.00539462	0.658484	-0.301006	-0.278547	-0.202793	-0.182751	-0.183034	-0.26084	1.33899	0.461843	0.116461	-0.0794772	-0.379773	-0.882857	0.399789	0.182467	0.0249396	1.15843	0.229283	-0.353418	-0.181174	-0.356214	-0.00704822	0.948918	-0.246471	0.101649	-0.278373	0.144674	-0.215666	-0.185872	-0.139108	-0.115854	-0.561994	-0.68521	0.0376443	-0.0736728	0.00448927
-0.246321	0.340143	-0.201886	0.194214	0.70176	-0.322162	0.462326	-0.00453973	0.908755	0.170711	-0.384563	0.548785	1.28117	0.00281709	0.633679	-0.355307	-0.283909	-0.143449	-0.137619	-0.188625	-0.316685	1.32397	0.360753	0.1927	-0.0438651	-0.307022	-0.849948	0.422862	0.191848	0.00570411	1.18652	0.217079	-0.361475	-0.152206	-0.388556	-0.015731	0.901511	-0.290817	0.104365	-0.276259	0.162385	-0.142087	-0.259162	-0.00763604	-0.0784484	-0.586791	-0.686479	0.0416203	-0.0842189	0.0192367
-0.27529	0.325044	-0.223537	0.167642	0.697369	-0.318798	0.47175	0.023049	0.904976	0.170207	-0.385584	0.565646	1.28769	0.0183299	0.621643	-0.451951	-0.281785	-0.118362	-0.0681234	-0.126069	-0.348045	1.30262	0.256129	0.243941	0.0280436	-0.31526	-0.813869	0.409093	0.217866	0.0312249	1.17129	0.2408	-0.451052	-0.10736	-0.33415	-0.0344775	0.769641	-0.233376	0.0910265	-0.254473	0.212262	-0.154466	-0.239088	0.0030386	-0.102047	-0.589327	-0.654947	0.0659991	-0.0620987	0.0172596
-0.30045	0.304765	-0.234765	0.153863	0.680966	-0.305038	0.448241	0.105827	0.918632	0.166881	-0.411095	0.576525	1.31347	0.0445776	0.604565	-0.508031	-0.265736	-0.187075	-0.0175475	-0.0269517	-0.334668	1.28003	0.150086	0.251181	0.0279425	-0.296611	-0.822699	0.390796	0.229403	0.063835	1.19622	0.217042	-0.4453	-0.070036	-0.34752	-0.048513	0.701902	-0.227165	0.0594	-0.238163	0.240567	-0.0901086	-0.229047	0.0003062	-0.0837884	-0.557392	-0.694365	0.06242	-0.0676273	0.0462795
-0.2846	0.274657	-0.224004	0.181583	0.654982	-0.28353	0.473311	0.149072	0.886128	0.161864	-0.394183	0.62298	1.33413	0.0631162	0.572287	-0.497735	-0.252244	-0.241046	-0.00659088	0.02876	-0.256747	1.29073	0.0785214	0.282404	0.0383352	-0.386866	-0.882448	0.360151	0.197502	0.131721	1.20895	0.215824	-0.447354	-0.0815885	-0.332642	-0.0966859	0.646305	-0.204552	0.0317618	-0.241585	0.241116	-0.0718533	-0.265564	-0.0392745	-0.169171	-0.556824	-0.681497	0.0319715	-0.0449706	0.00951624
-0.273644	0.281894	-0.21691	0.176603	0.673224	-0.239556	0.485212	0.165501	0.891539	0.163014	-0.414552	0.577918	1.35365	0.0777524	0.552904	-0.494934	-0.228285	-0.231446	-0.0239575	-0.0181211	-0.249456	1.27184	0.149416	0.294786	-0.0165101	-0.371195	-0.935309	0.364306	0.132395	0.18004	1.21258	0.193443	-0.354753	-0.131488	-0.311751	-0.121087	0.644065	-0.25393	0.00171178	-0.255064	0.206116	-0.0247365	-0.298213	0.0842753	-0.181916	-0.5046	-0.694787	0.0125381	-0.0560117	-0.0150678
-0.272259	0.261795	-0.197021	0.17994	0.6499	-0.233678	0.533477	0.20562	0.889733	0.179653	-0.396699	0.592903	1.36657	0.0782113	0.541317	-0.508801	-0.206931	-0.219788	-0.083292	-0.136256	-0.24564	1.24614	0.174601	0.331777	-0.0291617	-0.38295	-0.943598	0.344302	0.0976166	0.244246	1.12186	0.210684	-0.327598	-0.0864836	-0.305219	-0.140535	0.574072	-0.281565	0.13083	-0.233051	0.191121	0.0201349	-0.311385	0.166963	-0.198657	-0.497737	-0.672239	0.0122814	-0.0224322	-0.0492421
-0.279451	0.254608	-0.217053	0.172817	0.658747	-0.206496	0.551096	0.199823	0.866211	0.189303	-0.37895	0.609055	1.364	0.0648826	0.529277	-0.534972	-0.205618	-0.202996	-0.104054	-0.136016	-0.271005	1.22859	0.243958	0.313041	-0.0504753	-0.389482	-0.969913	0.317281	0.0956859	0.271688	1.12549	0.230026	-0.357769	-0.150899	-0.305444	-0.10363	0.59938	-0.240527	0.216848	-0.209103	0.215719	-0.00247938	-0.274992	0.137042	-0.181039	-0.558587	-0.680447	0.0404041	-0.0453467	-0.0122156
-0.28715	0.239303	-0.241581	0.158237	0.659085	-0.168736	0.597881	0.188337	0.812299	0.171741	-0.342639	0.642507	1.36329	0.0538794	0.498648	-0.579791	-0.215906	-0.232016	-0.15638	-0.169823	-0.244096	1.21077	0.218826	0.35339	-0.0276372	-0.408118	-0.942906	0.268288	0.0995532	0.319309	1.13191	0.2607	-0.413371	-0.181775	-0.318571	-0.100889	0.567293	-0.198741	0.183459	-0.178797	0.192231	0.0558687	-0.3127	0.112193	-0.167799	-0.596129	-0.711017	0.0448179	-0.0827231	-0.0091849
-0.273129	0.250826	-0.26014	0.15186	0.665882	-0.133616	0.589977	0.175422	0.794498	0.166157	-0.355705	0.659644	1.35575	0.0725606	0.504329	-0.589953	-0.214789	-0.271006	-0.182527	-0.140984	-0.267468	1.22741	0.252707	0.344358	0.0320791	-0.433347	-0.94434	0.261401	0.0323199	0.335418	1.15432	0.266213	-0.454899	-0.269648	-0.328956	-0.0834722	0.613805	-0.167573	0.116911	-0.139043	0.199987	0.0659583	-0.352496	0.0807749	-0.224671	-0.649156	-0.729757	0.0220748	-0.115003	0.0628981
-0.283165	0.254123	-0.266408	0.150866	0.651941	-0.140996	0.563864	0.213684	0.825099	0.146479	-0.367507	0.668559	1.35272	0.0943606	0.495168	-0.630045	-0.240789	-0.33165	-0.206228	-0.165334	-0.259358	1.24447	0.261326	0.34487	0.0873048	-0.310769	-0.888011	0.234992	-0.0388779	0.351425	1.13231	0.270095	-0.379763	-0.246682	-0.398547	-0.130987	0.65338	-0.196036	0.00757663	-0.12822	0.174914	0.118473	-0.38055	0.0292727	-0.210251	-0.626729	-0.743363	0.0129701	-0.14062	0.134194
-0.303005	0.261977	-0.256152	0.148092	0.61318	-0.166376	0.53365	0.228883	0.841841	0.18327	-0.392133	0.718415	1.36466	0.105477	0.47408	-0.635981	-0.207793	-0.347586	-0.237638	-0.160561	-0.242183	1.27627	0.306142	0.348401	0.163868	-0.367137	-0.847055	0.234828	-0.125464	0.335407	1.12935	0.28614	-0.305592	-0.193402	-0.445088	-0.128846	0.717617	-0.199963	0.0618081	-0.0791693	0.187857	0.0734687	-0.3545	0.0569834	-0.222666	-0.623527	-0.756441	-0.0282849	-0.144187	0.166752
-0.308359	0.262341	-0.254876	0.17218	0.65358	-0.16767	0.541882	0.235059	0.869306	0.180914	-0.396249	0.799779	1.37527	0.0969643	0.459287	-0.677765	-0.197695	-0.364818	-0.254058	-0.108756	-0.210297	1.28739	0.32367	0.377957	0.214752	-0.336111	-0.800387	0.221017	-0.144358	0.31279	1.13681	0.277492	-0.193203	-0.190806	-0.39547	-0.132714	0.808642	-0.179489	0.0780465	-0.0412032	0.245873	0.0690854	-0.27846	0.0482486	-0.154399	-0.616297	-0.789761	-0.0526322	-0.177413	0.120393
-0.316752	0.258448	-0.256565	0.177373	0.675295	-0.155589	0.589105	0.213752	0.883909	0.198648	-0.432042	0.876276	1.39693	0.104855	0.451551	-0.671691	-0.122567	-0.264214	-0.230067	-0.0625414	-0.197802	1.32683	0.301164	0.437455	0.262524	-0.42418	-0.846115	0.20514	-0.14851	0.284945	1.09892	0.271052	-0.173117	-0.140178	-0.220211	-0.132897	0.842492	-0.196044	0.113576	0.0126095	0.358348	0.0591911	-0.270617	0.113837	-0.163904	-0.593164	-0.741669	-0.0588357	-0.140065	0.0220473
-0.297572	0.254232	-0.25637	0.173034	0.700522	-0.123079	0.668124	0.240405	0.949589	0.227828	-0.441498	0.925735	1.43831	0.12661	0.485174	-0.617362	-0.090964	-0.248965	-0.172807	-0.0484463	-0.247627	1.39478	0.304922	0.480917	0.255943	-0.380581	-0.969928	0.260983	-0.18347	0.274812	1.04055	0.251491	-0.192623	-0.13149	-0.206695	-0.180172	0.837783	-0.271795	0.0924768	0.0370833	0.477164	0.177945	-0.28316	0.196691	-0.179359	-0.570925	-0.734566	-0.0251412	-0.0983829	-0.0214701
-0.300727	0.245003	-0.254527	0.156742	0.701293	-0.112199	0.745638	0.234671	0.95759	0.243662	-0.45602	0.960349	1.45217	0.139973	0.49232	-0.578621	-0.0560313	-0.22546	-0.123592	-0.0919175	-0.276643	1.46312	0.278666	0.527299	0.209082	-0.406573	-1.04433	0.241433	-0.184341	0.261584	1.00132	0.259576	-0.231052	-0.0837683	-0.250098	-0.189269	0.853654	-0.283632	0.0374864	0.0128644	0.516019	0.281864	-0.26452	0.24262	-0.246908	-0.557155	-0.681382	0.0113285	-0.0364656	-0.0240708
-0.314775	0.2476	-0.247391	0.141969	0.720693	-0.097654	0.798217	0.263054	0.962893	0.24251	-0.497269	0.964446	1.44952	0.16996	0.507936	-0.554055	-0.0640941	-0.312519	-0.118048	-0.12408	-0.301383	1.50675	0.341361	0.523926	0.117668	-0.33825	-1.06637	0.225879	-0.180555	0.293779	0.98956	0.228756	-0.258548	-0.177818	-0.362074	-0.157046	0.826099	-0.292315	0.0283275	0.0127689	0.510411	0.337967	-0.237782	0.338744	-0.269904	-0.577241	-0.667896	-0.000271249	-0.0442982	-0.00880664
-0.300957	0.233724	-0.2423	0.175637	0.731508	-0.10316	0.802115	0.226156	0.95409	0.218415	-0.520178	0.987939	1.42404	0.177356	0.495644	-0.567914	-0.0998123	-0.310771	-0.111304	-0.14311	-0.251511	1.50281	0.308817	0.528938	0.0241684	-0.368289	-1.03113	0.152294	-0.153092	0.322405	0.976691	0.191155	-0.262248	-0.259654	-0.34044	-0.124256	0.848888	-0.195654	0.0054135	0.00666487	0.486113	0.307377	-0.203448	0.238683	-0.265611	-0.620059	-0.619538	0.00312175	-0.0852511	0.112356
-0.312386	0.244409	-0.243144	0.141668	0.693246	-0.117299	0.8195	0.258331	0.939204	0.219883	-0.530014	0.960482	1.41438	0.184518	0.47701	-0.598359	-0.133414	-0.301204	-0.135713	-0.110135	-0.22729	1.53364	0.313964	0.597692	-0.0180391	-0.40713	-1.03177	0.102462	-0.167335	0.362933	0.942708	0.182246	-0.335252	-0.310657	-0.323751	-0.14181	0.85304	-0.192274	-0.0856957	0.0412415	0.438694	0.318504	-0.278669	0.238264	-0.263915	-0.575069	-0.569873	-0.00319649	-0.0972841	0.108005
-0.283979	0.237282	-0.229172	0.157357	0.652099	-0.126526	0.817587	0.23121	0.904585	0.252648	-0.506071	0.942695	1.42211	0.172375	0.481314	-0.611278	-0.141886	-0.290733	-0.135052	-0.104518	-0.216061	1.57208	0.284757	0.693072	-0.014984	-0.509662	-1.04395	0.111882	-0.154021	0.381078	0.936813	0.178189	-0.338498	-0.259064	-0.362648	-0.17301	0.903751	-0.150297	-0.0893406	0.0814943	0.406366	0.398995	-0.286219	0.0646044	-0.253578	-0.546863	-0.592469	-0.00471342	-0.129579	0.152051
-0.286471	0.242543	-0.227751	0.15961	0.647739	-0.159237	0.769343	0.261758	0.860409	0.263878	-0.490794	0.822197	1.43666	0.17562	0.486062	-0.6834	-0.122451	-0.343562	-0.144488	-0.0338246	-0.223672	1.64722	0.310961	0.798359	0.0287294	-0.45236	-1.02329	0.106624	-0.141921	0.424824	0.947769	0.186102	-0.341158	-0.197335	-0.367516	-0.189763	0.985042	-0.257567	-0.0985843	0.0878597	0.427555	0.462247	-0.312682	-0.00440409	-0.305452	-0.499641	-0.626125	0.00717634	-0.109929	0.137119
-0.29817	0.249224	-0.230408	0.18904	0.675191	-0.167451	0.699111	0.241964	0.84224	0.292109	-0.498964	0.779177	1.45361	0.184256	0.502178	-0.68361	-0.135139	-0.376609	-0.146497	-0.0266397	-0.259367	1.68867	0.355466	0.885861	0.0106059	-0.418612	-1.00521	0.168836	-0.10105	0.438438	1.00214	0.181853	-0.299063	-0.201814	-0.408228	-0.204275	0.993826	-0.224913	0.0122352	0.0611873	0.413888	0.442348	-0.339617	-0.0744183	-0.299814	-0.535381	-0.640527	0.00967451	-0.140023	0.157066
-0.330197	0.254987	-0.229499	0.137433	0.678646	-0.190607	0.673341	0.260595	0.864285	0.292588	-0.488658	0.685804	1.45277	0.203851	0.51779	-0.697216	-0.14938	-0.339912	-0.190535	-0.0238461	-0.259332	1.69453	0.43676	0.953703	0.00810987	-0.395526	-1.00482	0.190955	-0.171305	0.43223	1.02054	0.196867	-0.318278	-0.132236	-0.394384	-0.287976	0.968387	-0.182381	-0.0591436	0.0066482	0.406049	0.407641	-0.350597	0.0379353	-0.292592	-0.548428	-0.659853	0.0272727	-0.0995423	0.208198
-0.351569	0.262595	-0.228671	0.0989413	0.666541	-0.19613	0.697813	0.307845	0.890849	0.315268	-0.452905	0.70687	1.44357	0.229998	0.507209	-0.701194	-0.179556	-0.320316	-0.190571	0.0170178	-0.270478	1.67316	0.510158	0.983601	-0.0328308	-0.358876	-0.964211	0.189649	-0.194654	0.419542	1.02803	0.184031	-0.317128	-0.169818	-0.377984	-0.284032	0.897924	-0.103681	-0.0647435	-0.00101273	0.427585	0.384398	-0.332163	0.0821562	-0.253885	-0.58901	-0.695039	0.022538	-0.0980259	0.148325
-0.327772	0.263826	-0.225734	0.0925364	0.649264	-0.213212	0.668672	0.31088	0.921044	0.328278	-0.482429	0.641437	1.43053	0.230095	0.48681	-0.687143	-0.182729	-0.331463	-0.116962	0.134674	-0.257154	1.64702	0.554595	0.933516	-0.00756462	-0.325515	-0.969149	0.171133	-0.233706	0.385457	1.03212	0.148289	-0.286352	-0.144365	-0.353997	-0.271423	0.88779	-0.155191	-0.0907142	0.0141445	0.550848	0.304963	-0.28941	0.0768622	-0.26823	-0.605802	-0.733744	0.0296717	-0.0770505	0.229691
-0.306836	0.297132	-0.239848	0.125408	0.661698	-0.221082	0.663328	0.367694	0.916946	0.337233	-0.507477	0.609766	1.41852	0.20368	0.451629	-0.728242	-0.215399	-0.399153	-0.0658378	0.129839	-0.310663	1.61174	0.539622	0.928824	-0.0158622	-0.244015	-0.944839	0.159563	-0.220395	0.356822	0.994375	0.10118	-0.237654	-0.17876	-0.307577	-0.199772	0.891147	-0.246644	0.0614169	0.0657864	0.617833	0.31176	-0.256986	-0.00865336	-0.250884	-0.584184	-0.78238	0.0220579	-0.0801915	0.219528
-0.302056	0.308078	-0.244103	0.0980175	0.665944	-0.245647	0.642811	0.38989	0.924861	0.345489	-0.604668	0.523914	1.43526	0.159696	0.470313	-0.69844	-0.252933	-0.427538	-0.0289282	0.155023	-0.336699	1.59506	0.57481	0.904537	0.0453397	-0.30727	-1.03329	0.187314	-0.253604	0.279207	0.944676	0.0957744	-0.194393	-0.143888	-0.289824	-0.180663	0.888354	-0.250012	0.182332	0.0644876	0.6517	0.306817	-0.169802	-0.0679911	-0.220885	-0.604618	-0.79311	-0.00553653	-0.102823	0.227851
-0.301147	0.286086	-0.249858	0.0522097	0.677427	-0.262284	0.688178	0.40005	0.905011	0.329008	-0.590347	0.500171	1.44411	0.124061	0.461651	-0.753101	-0.275753	-0.408641	-0.0589026	0.0746318	-0.354658	1.58492	0.588677	0.901712	0.113975	-0.386295	-1.0521	0.129649	-0.265329	0.226878	0.877239	0.121099	-0.147725	-0.0787141	-0.258454	-0.18402	0.930548	-0.225568	0.229711	0.0490888	0.663393	0.41337	-0.0731857	-0.129301	-0.226014	-0.612568	-0.844038	-0.0487487	-0.152463	0.135283
-0.296694	0.265147	-0.25651	0.00861148	0.693524	-0.270175	0.685206	0.396815	0.884843	0.331988	-0.610048	0.494225	1.48321	0.128192	0.483522	-0.754368	-0.271256	-0.369484	-0.0584599	0.0322749	-0.357408	1.5864	0.617218	0.87233	0.206824	-0.437455	-1.0895	0.100052	-0.201567	0.177187	0.859952	0.137445	-0.0919241	-0.0557571	-0.220853	-0.197266	0.951049	-0.0917978	0.121202	0.0217399	0.699312	0.415893	-0.0314139	-0.210119	-0.301003	-0.600863	-0.827729	-0.0879693	-0.144319	0.0600038
-0.262631	0.231891	-0.249035	0.0204048	0.71603	-0.265942	0.692673	0.386941	0.881639	0.323996	-0.592273	0.549085	1.49007	0.117586	0.462404	-0.791304	-0.288676	-0.368637	-0.0506091	0.00644789	-0.363364	1.56372	0.541824	0.818101	0.223786	-0.400071	-1.07084	0.0788727	-0.176306	0.168783	0.851368	0.119302	-0.122805	-0.0663802	-0.20146	-0.211037	1.00398	-0.0805718	0.00996191	0.00111486	0.717237	0.407709	-0.145433	-0.278445	-0.289716	-0.560497	-0.792802	-0.096349	-0.163902	0.0226229
-0.222012	0.241565	-0.253151	0.0458438	0.754684	-0.269186	0.650555	0.462941	0.89031	0.343257	-0.595583	0.523649	1.51632	0.142947	0.451486	-0.830616	-0.326095	-0.341426	-0.0673088	0.0212431	-0.373262	1.52905	0.526891	0.795173	0.182833	-0.311611	-1.06772	0.15267	-0.176855	0.180721	0.842066	0.0616564	-0.112557	-0.134302	-0.280921	-0.193105	0.969388	-0.0363013	0.0692181	0.0105149	0.70475	0.43292	-0.288691	-0.253746	-0.208158	-0.54845	-0.755648	-0.0919955	-0.158342	0.0492271
-0.239245	0.230009	-0.246739	0.0303918	0.739	-0.278426	0.609286	0.466658	0.889789	0.362698	-0.612868	0.5331	1.5093	0.12723	0.432658	-0.875624	-0.367272	-0.328235	-0.0688099	0.128252	-0.346977	1.45986	0.466513	0.766739	0.0863677	-0.347694	-1.04182	0.219637	-0.271156	0.159327	0.810372	0.0528087	-0.224079	-0.156594	-0.33771	-0.205657	1.03709	-0.186038	0.152997	-0.00418037	0.733241	0.388956	-0.348258	-0.233916	-0.164189	-0.596188	-0.726549	-0.0885074	-0.186045	0.0598958
-0.323075	0.250403	-0.261584	0.0314123	0.712473	-0.293028	0.603627	0.474991	0.854891	0.366034	-0.579862	0.536093	1.50058	0.127931	0.401782	-0.892009	-0.346404	-0.297646	-0.0549491	0.150759	-0.373812	1.41852	0.41144	0.832463	0.0801497	-0.345694	-1.07631	0.209049	-0.28636	0.131952	0.808393	0.0729162	-0.250504	-0.0532351	-0.444371	-0.262976	1.17939	-0.148846	0.241755	0.0446256	0.678656	0.392238	-0.344119	-0.287578	-0.169882	-0.591417	-0.660455	-0.0542363	-0.108525	0.0739023
-0.384969	0.231673	-0.253327	-0.0114273	0.684208	-0.288128	0.639537	0.380305	0.776382	0.365858	-0.562604	0.511548	1.50102	0.0945646	0.403991	-0.903018	-0.371229	-0.286291	-0.0405669	0.117364	-0.386298	1.36338	0.368261	0.875855	0.02996	-0.402596	-1.10616	0.205605	-0.297652	0.105199	0.804952	0.101024	-0.337694	0.00478035	-0.407447	-0.312431	1.25707	-0.150797	0.132254	0.0144032	0.590998	0.279255	-0.358393	-0.375426	-0.227318	-0.62246	-0.65646	-0.0611602	-0.103538	0.0685141
-0.364738	0.231122	-0.272559	-0.0366112	0.698432	-0.284196	0.689715	0.36415	0.762511	0.339501	-0.536059	0.460877	1.50516	0.0678582	0.368457	-0.920027	-0.391839	-0.286584	-0.036455	0.0172498	-0.43039	1.34907	0.436724	0.942072	0.011519	-0.272838	-1.14589	0.185491	-0.247142	0.0992172	0.844898	0.0627581	-0.311842	0.0137963	-0.364731	-0.351217	1.27819	-0.13516	0.113773	0.0244935	0.463332	0.268443	-0.414921	-0.297399	-0.199989	-0.632386	-0.636251	-0.0596584	-0.0919257	-0.0197921
-0.32559	0.213559	-0.285887	-0.0505011	0.71475	-0.289727	0.675185	0.388388	0.744238	0.301122	-0.544383	0.41402	1.4903	0.0315622	0.337432	-0.971188	-0.448943	-0.284062	-0.062684	-0.00210619	-0.411491	1.3233	0.48146	0.962345	-0.0816518	-0.193799	-1.10819	0.157886	-0.203447	0.101516	0.869655	0.0198823	-0.317617	-0.0574927	-0.24226	-0.364666	1.28758	-0.0786178	0.0987994	0.010452	0.425644	0.278701	-0.422187	-0.227035	-0.227795	-0.690209	-0.661858	-0.0887934	-0.119981	-0.0329175
-0.317434	0.199666	-0.308793	-0.03068	0.67939	-0.325703	0.671253	0.466911	0.725692	0.264457	-0.540768	0.445355	1.46816	0.00241857	0.298427	-0.973735	-0.434421	-0.334735	-0.0518331	0.0257252	-0.410874	1.32455	0.47325	0.967912	-0.118713	-0.153045	-1.12237	0.091555	-0.153042	0.0950009	0.925072	0.0156159	-0.389045	-0.0340255	-0.119612	-0.434701	1.35361	-0.0699892	0.119333	0.0378072	0.400599	0.30563	-0.358069	-0.211569	-0.19754	-0.705624	-0.636019	-0.0738513	-0.0330521	-0.1143
-0.377135	0.163908	-0.316043	-0.00836873	0.674795	-0.353799	0.678234	0.551655	0.703038	0.235797	-0.477719	0.492892	1.46234	-0.0436625	0.294131	-0.977132	-0.439094	-0.420242	-0.0416637	0.0561962	-0.413001	1.35508	0.423485	0.925246	-0.176758	-0.180761	-1.10801	0.0669085	-0.0799442	0.104029	0.941971	0.0252585	-0.414411	-0.0434277	-0.174951	-0.415463	1.38819	-0.00519828	0.129596	0.0360366	0.368054	0.326587	-0.379556	-0.335172	-0.192687	-0.741344	-0.633178	-0.0397959	0.0255635	-0.0746359
-0.41404	0.16241	-0.316703	-0.0331125	0.653733	-0.356483	0.764967	0.554554	0.71192	0.247791	-0.409547	0.442799	1.46186	-0.0652964	0.32728	-0.897465	-0.427154	-0.451962	-0.0256482	-0.0406238	-0.412922	1.39193	0.450868	0.895999	-0.185042	-0.275245	-1.15364	0.0595077	-0.0776514	0.0973238	0.98448	0.0376729	-0.404647	-0.00932112	-0.224274	-0.429348	1.3149	-0.0907533	0.152894	0.027188	0.294364	0.294769	-0.379598	-0.342581	-0.153024	-0.729468	-0.656195	-0.0489743	0.0754576	-0.113462
-0.453962	0.162991	-0.323734	-0.0598153	0.656896	-0.379907	0.811835	0.561851	0.738249	0.261814	-0.316876	0.456044	1.46467	-0.0900176	0.33082	-0.864319	-0.431619	-0.518489	-0.0360998	-0.0606161	-0.403746	1.4368	0.483461	0.909242	-0.206257	-0.261623	-1.14786	0.0405491	-0.0784483	0.096261	0.9841	0.0344959	-0.388319	-0.0663131	-0.353926	-0.37898	1.30779	-0.145008	0.167454	0.0151242	0.225709	0.277357	-0.439118	-0.428506	-0.195813	-0.707589	-0.649501	-0.0390456	0.0656264	-0.0997956
-0.41775	0.172422	-0.32767	-0.0624573	0.627878	-0.41389	0.864323	0.60128	0.731282	0.266743	-0.254275	0.398049	1.4572	-0.118644	0.325027	-0.858846	-0.449974	-0.516238	-0.0333768	-0.0536791	-0.372068	1.46159	0.498717	0.934765	-0.223975	-0.282957	-1.16859	-0.0178282	-0.126567	0.0988661	0.978235	0.00827891	-0.360113	-0.0882885	-0.362435	-0.409771	1.33627	-0.131077	0.143875	-0.00787728	0.188047	0.240327	-0.393343	-0.483211	-0.187631	-0.700033	-0.656034	-0.05471	0.0551666	-0.0486339
-0.410115	0.163199	-0.323577	-0.079486	0.620616	-0.474026	0.928124	0.600365	0.703752	0.27818	-0.179075	0.362799	1.49247	-0.138369	0.333291	-0.882572	-0.437173	-0.558169	-0.03518	-0.0389695	-0.368494	1.47233	0.517285	0.995371	-0.189271	-0.331137	-1.15659	0.0170538	-0.155063	0.0593801	0.999989	-0.0147876	-0.37795	-0.0615901	-0.411938	-0.428242	1.36785	-0.11595	0.0347917	0.00126503	0.164126	0.203412	-0.41836	-0.555182	-0.170612	-0.684606	-0.568577	-0.0298589	0.0653031	-0.0894806
-0.383248	0.16173	-0.328702	-0.0991743	0.613028	-0.481568	0.997533	0.610629	0.692436	0.26071	-0.151267	0.284458	1.51451	-0.143943	0.358801	-0.895123	-0.445268	-0.553638	-0.0434548	-0.0998272	-0.342672	1.45492	0.579113	1.01469	-0.188864	-0.402451	-1.13966	0.073191	-0.210308	0.0682092	1.0445	-0.06742	-0.335971	-0.0538502	-0.418887	-0.432688	1.35184	-0.0916068	0.0146813	0.0423967	0.158268	0.231185	-0.424527	-0.523704	-0.148952	-0.657594	-0.567612	-0.0534702	0.058261	-0.00608116
-0.43165	0.162282	-0.33451	-0.115193	0.614027	-0.485839	1.04832	0.559534	0.696032	0.267941	-0.0830235	0.272114	1.52724	-0.127239	0.399447	-0.870334	-0.40064	-0.566546	-0.0477326	-0.111563	-0.345802	1.42691	0.617209	1.0735	-0.184714	-0.385152	-1.11171	0.154198	-0.239385	0.0230016	1.08584	-0.0703266	-0.396987	-0.0320276	-0.444619	-0.427998	1.36102	-0.0566595	-0.0657192	0.101281	0.116426	0.255514	-0.497633	-0.485396	-0.109867	-0.6185	-0.524126	-0.064844	0.0693065	-0.00258185
-0.424694	0.176512	-0.353757	-0.0928805	0.561153	-0.495437	1.00267	0.512736	0.682016	0.258557	-0.0559424	0.360352	1.51564	-0.109653	0.417743	-0.862657	-0.405382	-0.536523	-0.0710121	-0.0234807	-0.315434	1.43372	0.618873	1.06375	-0.247238	-0.252954	-1.08673	0.156422	-0.213569	0.0508666	1.07809	-0.10498	-0.341303	-0.0818055	-0.406187	-0.374985	1.34343	-0.0384608	-0.0528421	0.128737	0.109324	0.237141	-0.478935	-0.463154	-0.142512	-0.59167	-0.589158	-0.0872823	0.0806625	0.111065
-0.498348	0.200647	-0.364917	-0.0559043	0.57439	-0.526296	0.965247	0.475192	0.669092	0.270478	0.036558	0.376214	1.50421	-0.124532	0.444988	-0.849771	-0.384702	-0.526445	-0.078982	0.0799658	-0.335465	1.44145	0.617025	1.06811	-0.188967	-0.185282	-1.08216	0.138033	-0.180223	0.0406502	1.10169	-0.12035	-0.296191	-0.0672166	-0.377538	-0.377933	1.47484	-0.0415871	-0.0711468	0.0838496	0.0960535	0.162487	-0.475304	-0.465598	-0.122448	-0.612365	-0.569428	-0.0838935	0.0922038	0.148769
-0.50685	0.203591	-0.374057	-0.0396933	0.544542	-0.552151	0.918827	0.434517	0.6063	0.236501	0.0657345	0.417743	1.48459	-0.127611	0.425257	-0.865887	-0.342898	-0.471713	-0.107508	0.102025	-0.325663	1.46049	0.660146	1.03925	-0.139647	-0.226355	-1.07593	0.080172	-0.214168	0.055679	1.14207	-0.100041	-0.272101	-0.00249234	-0.403347	-0.359568	1.48695	-0.0921379	-0.0188961	0.0623608	0.116288	0.137565	-0.408402	-0.48126	-0.215129	-0.619753	-0.583898	-0.073211	0.0996384	0.132072
-0.551272	0.198168	-0.375502	-0.0673531	0.578283	-0.526762	0.891832	0.446231	0.589547	0.238764	0.157045	0.367937	1.45963	-0.142525	0.401536	-0.897326	-0.337158	-0.520391	-0.137326	0.0347014	-0.338319	1.44713	0.722869	1.06833	-0.119885	-0.320681	-1.06206	0.0813178	-0.268898	0.0246453	1.17436	-0.11073	-0.242694	0.00177282	-0.398511	-0.37331	1.49326	-0.117236	-0.00811282	0.053927	0.078851	0.0931509	-0.417516	-0.468301	-0.224734	-0.59608	-0.531481	-0.0790661	0.0471485	0.0977764
-0.51888	0.18596	-0.366236	-0.0862126	0.578381	-0.510856	0.831599	0.474623	0.623941	0.227324	0.188368	0.414557	1.43612	-0.141266	0.364468	-0.919494	-0.345281	-0.513762	-0.181887	0.000507315	-0.322631	1.45935	0.652958	1.06126	-0.183848	-0.228379	-1.05209	0.100934	-0.307122	0.0198468	1.19034	-0.118448	-0.249473	-0.0210377	-0.367348	-0.327314	1.36858	-0.15367	0.0488814	0.0990232	0.102235	0.0776309	-0.439689	-0.534712	-0.239619	-0.567781	-0.520415	-0.101627	0.0652435	0.0897869
-0.477601	0.187632	-0.356024	-0.109032	0.583313	-0.488982	0.81511	0.499379	0.66935	0.250179	0.201286	0.423706	1.43337	-0.148257	0.395926	-0.928411	-0.383843	-0.506312	-0.164302	-0.00396663	-0.306809	1.47447	0.436453	1.10035	-0.203423	-0.216887	-1.03481	0.124608	-0.29382	-0.0103219	1.17965	-0.166682	-0.168007	-0.0140104	-0.205791	-0.359286	1.28266	-0.159688	0.0177136	0.172756	0.132885	0.0630764	-0.438652	-0.427343	-0.196051	-0.522074	-0.503458	-0.10927	0.0503374	0.126831
-0.437369	0.174687	-0.375278	-0.0709303	0.574054	-0.494975	0.815931	0.541029	0.648822	0.237988	0.156174	0.444457	1.45055	-0.139679	0.395642	-0.890478	-0.3606	-0.451028	-0.119161	0.0623838	-0.31167	1.5052	0.244693	1.08176	-0.177581	-0.272319	-1.09626	0.113096	-0.290228	-0.0263883	1.19257	-0.165209	-0.16845	-0.00266613	-0.150371	-0.32878	1.32082	-0.163377	-0.0207415	0.133997	0.21189	0.133442	-0.393766	-0.458229	-0.160001	-0.553963	-0.491078	-0.096729	0.0818588	0.135549
-0.423215	0.171494	-0.407248	-0.0558749	0.556059	-0.47934	0.886146	0.605847	0.577697	0.228759	0.176814	0.437452	1.45818	-0.138387	0.405403	-0.876184	-0.289678	-0.440239	-0.0823219	-0.018981	-0.311039	1.52097	0.174854	1.20664	-0.0824902	-0.402779	-1.12975	0.123279	-0.253024	-0.0291924	1.1496	-0.136809	-0.204533	0.096845	-0.0608257	-0.43752	1.27116	-0.137405	-0.0631969	0.154599	0.210322	0.248997	-0.326142	-0.312228	-0.126928	-0.542964	-0.493883	-0.0310406	0.0698774	0.129688
-0.414938	0.159589	-0.429222	-0.0349881	0.525322	-0.490065	0.894101	0.600748	0.537835	0.214531	0.220723	0.522374	1.45523	-0.123941	0.351381	-0.821726	-0.269747	-0.497263	-0.0808861	0.0369065	-0.285151	1.55784	0.176159	1.22433	-0.0394202	-0.398673	-1.15282	0.0908354	-0.247043	0.0206453	1.1451	-0.114383	-0.284233	0.0958101	-0.173387	-0.456188	1.36267	-0.141568	-0.0651211	0.0911492	0.291892	0.319857	-0.285231	-0.32934	-0.118144	-0.594793	-0.499364	0.034958	0.112331	0.210803
-0.372964	0.176507	-0.435336	-0.0435671	0.513167	-0.522772	0.881961	0.570843	0.524432	0.201988	0.294364	0.641319	1.42768	-0.145252	0.324334	-0.823057	-0.279466	-0.562008	-0.123814	0.0924471	-0.259415	1.64174	0.0926138	1.20916	-0.0169399	-0.315312	-1.11303	0.0704185	-0.215264	0.100474	1.12427	-0.104475	-0.306194	0.0739994	-0.265687	-0.488898	1.33056	-0.122155	-0.121004	0.0778818	0.339943	0.406894	-0.319121	-0.315956	-0.1683	-0.590882	-0.58	0.053421	0.111704	0.314257
-0.335549	0.168312	-0.429142	-0.040791	0.482728	-0.563983	0.789054	0.526481	0.555314	0.186246	0.327942	0.809912	1.41198	-0.146507	0.309623	-0.793229	-0.302762	-0.58236	-0.132198	0.290621	-0.239577	1.74466	0.018974	1.12687	-0.00732892	-0.274044	-1.07944	0.0318856	-0.240263	0.123746	1.11376	-0.0926617	-0.290674	-0.0292822	-0.369648	-0.385899	1.42691	-0.0867002	-0.192703	0.0200483	0.370115	0.479208	-0.316746	-0.361884	-0.15328	-0.611782	-0.633571	0.0261568	0.106564	0.331403
-0.321884	0.184209	-0.436816	0.00185519	0.472635	-0.580986	0.777503	0.468514	0.583837	0.178241	0.324525	0.879327	1.3992	-0.129829	0.313221	-0.768773	-0.283632	-0.604165	-0.145347	0.262033	-0.264885	1.81812	-0.103015	1.06817	0.0477717	-0.31011	-1.08257	0.039211	-0.217793	0.117977	1.05115	-0.0757253	-0.240137	-0.0968244	-0.341702	-0.351076	1.44805	-0.0371226	-0.241478	-0.0197889	0.385411	0.584568	-0.358732	-0.381058	-0.190918	-0.595478	-0.742015	-0.0224464	0.0609601	0.296345
-0.304799	0.173337	-0.441097	0.0422742	0.469436	-0.568762	0.754576	0.428768	0.612636	0.192988	0.298232	0.913421	1.40435	-0.103306	0.339636	-0.702964	-0.254948	-0.565497	-0.130653	0.243039	-0.238685	1.85495	-0.0383962	1.04619	0.0838148	-0.391741	-1.14057	0.0500271	-0.250587	0.100049	0.960728	-0.0573828	-0.203389	-0.0153425	-0.261962	-0.37582	1.51277	-0.0281176	-0.238077	-0.0247678	0.379013	0.588659	-0.344589	-0.22344	-0.191601	-0.548187	-0.782833	-0.0435898	0.0751942	0.228469
-0.293003	0.176548	-0.444009	0.0724509	0.475158	-0.563469	0.799497	0.356669	0.60778	0.20612	0.28919	0.86626	1.40937	-0.0634553	0.332475	-0.693076	-0.205662	-0.55147	-0.128404	0.135756	-0.286968	1.84982	0.0147735	0.962407	0.0775651	-0.401937	-1.17874	0.0626601	-0.248269	0.0454756	0.909973	-0.0365158	-0.189025	0.0747916	-0.252429	-0.44361	1.51703	0.0154887	-0.280186	-0.058362	0.399285	0.62384	-0.323392	-0.10019	-0.292923	-0.526345	-0.817062	-0.0549873	0.0786706	0.222501
-0.308702	0.175038	-0.459061	0.0479836	0.509975	-0.547027	0.761166	0.417088	0.581454	0.223438	0.302466	0.800358	1.41693	-0.0493055	0.321534	-0.679391	-0.157011	-0.49232	-0.140979	0.121135	-0.283157	1.84232	0.154956	0.873684	0.0430577	-0.384015	-1.24485	0.0710958	-0.259666	-0.00123311	0.931024	-0.0112715	-0.18867	0.0826854	-0.204186	-0.390634	1.47564	-0.0380441	-0.249387	-0.0820811	0.366432	0.667273	-0.315866	-0.074511	-0.287511	-0.480791	-0.759656	-0.054167	0.0855156	0.22738
-0.318196	0.181659	-0.473723	-0.00541535	0.51893	-0.540044	0.735845	0.455302	0.561314	0.197214	0.345961	0.685102	1.4193	-0.0121018	0.301048	-0.633971	-0.0544771	-0.499762	-0.172084	0.125771	-0.340271	1.79983	0.154333	0.791285	0.0452955	-0.38174	-1.23197	0.0616701	-0.312906	-0.0598278	1.03737	0.0559464	-0.261939	0.0765859	-0.267263	-0.360761	1.41373	0.00957514	-0.220402	-0.0990092	0.411178	0.851649	-0.242319	-0.0912555	-0.308903	-0.509575	-0.735341	-0.0459823	0.0716032	0.18377
-0.344874	0.189665	-0.486434	-0.0138194	0.502987	-0.524521	0.733166	0.481021	0.5678	0.200174	0.370033	0.621509	1.41953	-0.0106067	0.310252	-0.557788	-0.0446419	-0.475443	-0.194892	0.181183	-0.30238	1.78375	0.121098	0.693525	0.0749537	-0.498367	-1.23998	0.0558064	-0.409359	-0.0771818	1.14787	0.0933114	-0.24839	-0.0312668	-0.25361	-0.279471	1.41865	0.0263356	-0.0973095	-0.132512	0.44998	1.023	-0.232433	0.00832282	-0.291768	-0.513231	-0.717134	-0.074018	0.0464243	0.166229
-0.299003	0.189707	-0.485786	0.000282064	0.480037	-0.550917	0.75341	0.495278	0.56174	0.193292	0.419245	0.585885	1.3976	-0.0176503	0.274269	-0.480547	-0.0231186	-0.480239	-0.212647	0.199811	-0.267423	1.74914	0.107633	0.602739	0.118568	-0.579651	-1.21699	0.0348406	-0.481753	-0.0893363	1.2098	0.113558	-0.147069	-0.124153	-0.262124	-0.267289	1.41444	0.108083	-0.147631	-0.156996	0.487186	1.20025	-0.162517	0.112191	-0.252956	-0.561254	-0.736253	-0.145506	0.0090025	0.106521
-0.312524	0.195909	-0.496795	0.0956988	0.408078	-0.577743	0.759246	0.483347	0.570798	0.182761	0.447979	0.645171	1.35812	-0.0540156	0.214051	-0.504636	-0.0429273	-0.468479	-0.229961	0.160254	-0.216554	1.75413	0.0550377	0.540551	0.15678	-0.614727	-1.19217	0.00375157	-0.46862	-0.061233	1.18408	0.0969896	0.024089	-0.217516	-0.239974	-0.242973	1.47557	0.121487	-0.185739	-0.181582	0.450023	1.29615	-0.121892	0.266175	-0.20896	-0.542223	-0.749589	-0.173308	0.00945067	0.139591
-0.244576	0.190523	-0.517155	0.133176	0.378897	-0.63872	0.701703	0.516108	0.513255	0.142676	0.482732	0.687166	1.32805	-0.064905	0.124151	-0.549837	-0.0490971	-0.462478	-0.216763	0.235849	-0.175927	1.78185	-0.164845	0.455371	0.185799	-0.698564	-1.14546	-0.0575604	-0.399008	-0.0669323	1.19143	0.0718361	0.115493	-0.23078	-0.263981	-0.244471	1.47997	0.121661	-0.345359	-0.149218	0.456605	1.31103	-0.0598237	0.303738	-0.169965	-0.501832	-0.718374	-0.190006	0.0398829	0.0971552
-0.254871	0.198287	-0.516812	0.154484	0.34735	-0.668462	0.604969	0.436783	0.497042	0.131043	0.498654	0.750698	1.32337	-0.0407579	0.104996	-0.574473	-0.101733	-0.470129	-0.227741	0.377442	-0.157566	1.78472	-0.367814	0.419342	0.200934	-0.756655	-1.10245	-0.0537215	-0.40694	-0.0206283	1.26961	0.0371814	0.0750932	-0.224462	-0.237778	-0.269595	1.53624	0.14909	-0.43832	-0.172273	0.411021	1.28996	-0.0358979	0.391866	-0.215695	-0.407849	-0.743684	-0.169396	0.0565664	0.0747594
-0.224579	0.184686	-0.514362	0.107978	0.34966	-0.701947	0.53502	0.416938	0.473083	0.103901	0.506036	0.771169	1.32289	-0.0334183	0.0974622	-0.570096	-0.149289	-0.442961	-0.240797	0.48953	-0.157024	1.75219	-0.397235	0.401321	0.2456	-0.781274	-1.10142	-0.0697891	-0.388134	-0.0280138	1.39664	0.018139	0.00560738	-0.199987	-0.110096	-0.305048	1.50669	0.144736	-0.479723	-0.153921	0.45317	1.23634	-0.0507344	0.346551	-0.241269	-0.388534	-0.721357	-0.160068	0.00958433	0.0757109
-0.263859	0.191876	-0.517053	0.0571158	0.310819	-0.670999	0.531756	0.341702	0.492619	0.119732	0.517126	0.731582	1.30798	-0.0320415	0.110934	-0.49716	-0.188049	-0.448955	-0.29005	0.470926	-0.149816	1.67504	-0.159489	0.396972	0.282247	-0.785149	-1.13952	-0.0488955	-0.409144	0.0256001	1.37595	-0.00352824	0.0400268	-0.135945	0.0262957	-0.35853	1.47097	0.167192	-0.48286	-0.139106	0.539181	1.2025	-0.028807	0.506227	-0.240631	-0.360512	-0.752516	-0.127895	-0.0516375	0.136187
-0.299403	0.195514	-0.549939	0.0509734	0.286045	-0.645015	0.519639	0.356667	0.486462	0.110175	0.560845	0.692395	1.28568	-0.0774234	0.0941829	-0.455391	-0.209705	-0.416789	-0.319659	0.435496	-0.179731	1.63483	-0.0753029	0.374998	0.335193	-0.838584	-1.1624	-0.070768	-0.407713	0.0250936	1.28368	-0.0149128	0.124714	-0.0334322	0.0684711	-0.417406	1.4634	0.264834	-0.437618	-0.0732783	0.685693	1.17038	-0.0176414	0.800046	-0.200753	-0.424498	-0.738035	-0.0906999	-0.111578	0.231866
-0.348505	0.223454	-0.560899	0.00981273	0.260894	-0.627072	0.504149	0.378837	0.466823	0.138291	0.608412	0.612326	1.2852	-0.0571754	0.0827053	-0.39651	-0.217456	-0.328556	-0.352267	0.420677	-0.144245	1.60728	-0.290899	0.301337	0.334043	-0.87625	-1.15288	-0.0249817	-0.469628	0.0367902	1.11256	-0.0264561	0.184051	-0.086101	0.0743198	-0.378068	1.45025	0.300267	-0.412733	-0.0375306	0.822993	1.19303	-0.0602508	1.21435	-0.157521	-0.496181	-0.789494	-0.0753468	-0.153019	0.274198
-0.373815	0.219973	-0.568436	0.012083	0.246625	-0.644126	0.412264	0.433691	0.421636	0.125727	0.635412	0.599286	1.27737	-0.020943	0.0771663	-0.355077	-0.170597	-0.226194	-0.368757	0.48727	-0.129143	1.56306	-0.441034	0.334074	0.368015	-0.872529	-1.15209	-0.0357456	-0.466709	0.0164	1.0404	0.0464936	0.207822	-0.0620796	0.0483692	-0.336683	1.5008	0.430561	-0.460991	0.00233512	0.829245	1.16525	-0.0675263	1.28981	-0.158453	-0.559649	-0.80247	-0.0663675	-0.168359	0.230792
-0.390546	0.208589	-0.563762	-0.00186105	0.194501	-0.674652	0.422537	0.414842	0.342148	0.106561	0.63104	0.539017	1.26033	0.0407872	0.0924368	-0.321755	-0.149196	-0.134842	-0.400102	0.457441	-0.0935974	1.51422	-0.438492	0.336478	0.403676	-0.860367	-1.14891	-0.0632501	-0.415945	-0.0366322	0.961712	0.102745	0.229301	-0.0373462	0.0373227	-0.241062	1.48092	0.503927	-0.534017	0.0247922	0.826925	1.1007	-0.0939784	1.17156	-0.220149	-0.52653	-0.796422	-0.0812624	-0.195867	0.179248
-0.393357	0.182343	-0.566251	0.0522737	0.18388	-0.675721	0.446291	0.387624	0.292061	0.0788847	0.611878	0.521839	1.22469	0.101219	0.0705499	-0.336301	-0.133472	-0.125218	-0.411413	0.433587	-0.119819	1.4625	-0.255661	0.388007	0.43618	-0.833428	-1.16765	-0.154132	-0.325531	-0.073241	0.987358	0.147502	0.264394	0.0651546	0.0171945	-0.198682	1.4795	0.618199	-0.600146	0.0317594	0.753611	0.98892	-0.0395272	0.990874	-0.328568	-0.472755	-0.770922	-0.0826477	-0.1735	0.137788
-0.422279	0.192332	-0.573408	0.0612685	0.151998	-0.650671	0.483938	0.302446	0.255693	0.0728469	0.626912	0.496101	1.20517	0.162425	0.0803602	-0.402933	-0.13039	-0.12104	-0.431526	0.419431	-0.159222	1.45038	-0.18319	0.369857	0.443174	-0.775948	-1.10716	-0.173898	-0.331808	-0.125776	0.931434	0.0945721	0.270403	0.0924125	0.0271964	-0.130599	1.42828	0.573058	-0.571214	0.0152408	0.763672	0.914355	-0.0747502	1.15876	-0.367837	-0.460779	-0.765015	-0.0546368	-0.173483	0.157338
-0.435129	0.202304	-0.570909	0.0737473	0.156777	-0.638635	0.45248	0.300358	0.32004	0.0910971	0.634262	0.498722	1.19677	0.243629	0.106315	-0.420874	-0.0762931	-0.144141	-0.447537	0.494127	-0.183306	1.4278	-0.20148	0.38486	0.475918	-0.840664	-1.08723	-0.102157	-0.354926	-0.0884743	0.859303	0.0753776	0.234873	0.103115	0.0650359	-0.122686	1.32791	0.550103	-0.501051	-0.00334651	0.697982	0.933675	-0.0964701	1.26968	-0.342925	-0.473483	-0.845575	-0.0503728	-0.13548	0.100963
-0.481608	0.223619	-0.581689	0.0869923	0.134126	-0.648943	0.415546	0.277427	0.339485	0.103981	0.669758	0.554193	1.18855	0.283814	0.159603	-0.419127	0.0207604	-0.166734	-0.44217	0.542895	-0.170369	1.41997	-0.299269	0.442334	0.480046	-0.880446	-1.02995	-0.0938484	-0.387839	-0.112703	0.733635	0.0891707	0.107144	0.135771	0.0919805	-0.133539	1.30994	0.59223	-0.488111	0.013236	0.639387	0.980665	-0.174527	1.39672	-0.293768	-0.480104	-0.862205	-0.0454716	-0.141618	0.0738404
-0.500221	0.228982	-0.570693	0.126942	0.119723	-0.692279	0.323707	0.294752	0.425113	0.0942981	0.698631	0.575936	1.18163	0.329709	0.181509	-0.36203	0.105782	-0.176567	-0.438422	0.62841	-0.172261	1.41267	-0.430885	0.471796	0.482585	-0.969049	-1.01783	-0.0839159	-0.411458	-0.0976023	0.655572	0.139233	0.0554182	0.156043	0.172799	-0.155433	1.26754	0.693652	-0.40457	0.0611629	0.60911	0.976547	-0.156444	1.46453	-0.259115	-0.440454	-0.893614	-0.0448488	-0.0713215	0.0244918
-0.529167	0.236435	-0.583395	0.120685	0.107136	-0.697646	0.289288	0.266203	0.413794	0.0480544	0.698616	0.596561	1.14609	0.307882	0.155137	-0.387916	0.180443	-0.168695	-0.443424	0.619979	-0.159588	1.40596	-0.510733	0.522068	0.474267	-0.899539	-0.965308	-0.180181	-0.411246	-0.159361	0.680976	0.176897	0.0793836	0.191704	0.219016	-0.160779	1.2884	0.767109	-0.406725	0.125256	0.602355	0.928441	-0.0738703	1.58338	-0.151942	-0.374492	-0.835206	-0.0408334	-0.014091	0.0268054
-0.51341	0.235737	-0.586586	0.095083	0.110667	-0.671846	0.241673	0.256585	0.41857	0.013816	0.701591	0.556816	1.10133	0.300416	0.123665	-0.361836	0.191796	-0.144016	-0.453876	0.630557	-0.164344	1.36009	-0.4648	0.437902	0.446058	-0.836602	-0.949507	-0.176273	-0.391042	-0.142016	0.666042	0.190337	0.171175	0.0719977	0.276521	-0.136878	1.20248	0.75877	-0.396459	0.118296	0.609535	0.870832	-0.0337676	1.51293	0.00133349	-0.299563	-0.842207	-0.0860405	0.023935	-0.0180851
-0.501009	0.261466	-0.595172	0.0920459	0.0979084	-0.652468	0.246103	0.26414	0.329984	0.0284512	0.635504	0.535973	1.05747	0.286431	0.101494	-0.321656	0.236172	-0.119864	-0.455598	0.547483	-0.107618	1.29886	-0.43743	0.407747	0.447239	-0.768007	-0.992286	-0.174381	-0.330319	-0.177781	0.678635	0.150209	0.240536	0.0682865	0.263432	-0.119695	1.12929	0.744509	-0.500376	0.0853807	0.592901	0.851279	0.0215114	1.30581	0.0836466	-0.221644	-0.769808	-0.144204	0.00597457	0.00989489
-0.486901	0.273177	-0.590071	0.104078	0.0521454	-0.678773	0.212311	0.236961	0.328204	0.0350929	0.604801	0.504731	1.04037	0.276682	0.120884	-0.314449	0.281945	-0.101332	-0.453335	0.517844	-0.0689906	1.23511	-0.346422	0.343941	0.429483	-0.77059	-1.01699	-0.163456	-0.332363	-0.136177	0.569212	0.142327	0.250854	0.035104	0.261335	-0.123583	1.09366	0.719799	-0.664851	0.0364929	0.549493	0.759902	0.0251331	1.09205	0.0708297	-0.189492	-0.679205	-0.181515	0.0139954	0.023191
-0.529905	0.282604	-0.583442	0.104526	-0.0108173	-0.680224	0.174697	0.241404	0.3408	0.00876671	0.560175	0.49031	1.0179	0.24923	0.116911	-0.317988	0.322245	-0.100148	-0.48291	0.481274	-0.0482715	1.1768	-0.269433	0.346713	0.483142	-0.783821	-1.01566	-0.164443	-0.362081	-0.110704	0.511107	0.120965	0.285177	0.132571	0.262406	-0.137334	1.04974	0.705924	-0.704003	0.010721	0.527445	0.691689	0.0979986	1.16666	0.0805843	-0.125042	-0.640494	-0.181341	0.0250704	0.00737644
-0.566359	0.272554	-0.591357	0.0860448	-0.0466588	-0.679951	0.109377	0.274509	0.366053	-0.026229	0.551525	0.466215	0.998903	0.229266	0.109821	-0.347699	0.369224	-0.139525	-0.519346	0.488662	-0.0448385	1.10174	-0.0886086	0.336516	0.480724	-0.800187	-0.981228	-0.164223	-0.441697	-0.101756	0.463658	0.170913	0.313257	0.0626276	0.286407	-0.107781	1.06772	0.776271	-0.673774	-0.0234604	0.481406	0.596773	0.0975696	1.17709	0.12029	-0.12292	-0.565871	-0.174356	0.0227983	-0.057126
-0.610328	0.270071	-0.590205	0.0624777	-0.0598545	-0.634045	0.0513688	0.278582	0.374827	-0.0579357	0.554477	0.457837	0.95999	0.238007	0.0863308	-0.289261	0.456175	-0.0742826	-0.534471	0.536686	-0.0584421	1.0493	-0.0123746	0.323637	0.472243	-0.755777	-0.982135	-0.175713	-0.496385	-0.134277	0.481959	0.250669	0.298556	0.0550276	0.327807	-0.089741	1.03372	0.701802	-0.549896	-0.0217457	0.54183	0.513971	0.104077	1.40109	0.127925	-0.125858	-0.540641	-0.162667	-0.0161183	-0.122714
-0.618087	0.278447	-0.581388	0.0447286	-0.0606783	-0.641071	0.00304501	0.232514	0.348201	-0.0608118	0.56233	0.430917	0.957532	0.28519	0.0983505	-0.243964	0.585912	-0.0250982	-0.518748	0.604993	-0.056717	0.979494	-0.0794178	0.281625	0.425504	-0.796006	-1.0056	-0.171871	-0.56841	-0.18007	0.57485	0.378184	0.278533	0.0598913	0.306854	-0.1059	1.00746	0.800434	-0.479071	-0.0603258	0.600691	0.38252	0.0222674	1.46764	0.127351	-0.222053	-0.46101	-0.174271	-0.113554	-0.164658
-0.639743	0.274802	-0.563101	0.0358363	-0.0392429	-0.62634	-6.77e-05	0.159523	0.36106	-0.071368	0.564355	0.423138	0.963342	0.315605	0.121742	-0.200899	0.667472	0.0765227	-0.500292	0.627526	-0.0548447	0.911473	-0.284189	0.22068	0.400279	-0.82416	-1.08078	-0.149106	-0.595927	-0.201405	0.62792	0.487473	0.236967	0.0124326	0.313191	-0.0981618	0.882816	0.792241	-0.454722	-0.113252	0.742298	0.317583	-0.021203	1.65745	0.115097	-0.317495	-0.499868	-0.184227	-0.183327	-0.196779
-0.650261	0.261023	-0.569679	0.0323186	-0.0177915	-0.628592	0.001701	0.132549	0.325474	-0.0872495	0.55035	0.402691	0.968109	0.35341	0.109919	-0.220319	0.753682	0.0545378	-0.490357	0.597299	-0.0491859	0.840744	-0.454887	0.163096	0.42099	-0.818142	-1.05442	-0.184098	-0.578002	-0.264753	0.710562	0.625488	0.222562	0.00847668	0.247096	-0.0741281	0.825157	0.919446	-0.314169	-0.178552	0.873285	0.342821	-0.0432561	1.47344	0.135523	-0.419148	-0.527948	-0.21008	-0.240679	-0.153979
-0.655748	0.245845	-0.576841	0.0529046	-0.0398769	-0.628237	-0.042177	0.148067	0.345616	-0.0920861	0.519442	0.419807	0.954553	0.350102	0.0957842	-0.213669	0.814287	0.0598108	-0.475097	0.596141	-0.0553536	0.794926	-0.428863	0.178169	0.531369	-0.818983	-1.03943	-0.181193	-0.519249	-0.393859	0.652407	0.748996	0.267952	0.0150791	0.235017	-0.00464214	0.857262	0.892538	-0.329333	-0.184153	0.891872	0.428207	0.0352208	1.30114	0.0901342	-0.445121	-0.542922	-0.26086	-0.252153	-0.21683
-0.65487	0.252627	-0.57962	0.019921	-0.058429	-0.628271	-0.0726599	0.147105	0.336197	-0.0882553	0.510399	0.388318	0.937362	0.357367	0.107175	-0.171382	0.921815	0.0535181	-0.499848	0.557785	-0.0382042	0.758341	-0.336957	0.146354	0.654005	-0.733935	-0.998874	-0.206321	-0.50343	-0.481663	0.573699	0.91103	0.321035	0.149458	0.160118	0.000901356	0.872356	0.877932	-0.364868	-0.166317	0.907875	0.440847	0.128978	1.12204	0.0653817	-0.424748	-0.57589	-0.327202	-0.304917	-0.313503
-0.655251	0.268442	-0.569216	0.0190321	-0.0965576	-0.609029	-0.0925461	0.189725	0.359824	-0.0650606	0.473993	0.378198	0.928136	0.344611	0.119944	-0.124036	0.973091	0.14273	-0.53332	0.494869	-0.0153558	0.703166	-0.15075	0.108705	0.722477	-0.675211	-1.02969	-0.151253	-0.488364	-0.563373	0.452674	0.987816	0.441767	0.138861	0.227938	0.0424088	0.900937	0.905273	-0.476255	-0.182784	0.854862	0.433203	0.189942	1.1137	0.0467664	-0.435741	-0.591403	-0.387882	-0.345098	-0.441729
-0.665544	0.282535	-0.576492	0.0023872	-0.093092	-0.60174	-0.0960099	0.211963	0.365974	-0.0493612	0.456254	0.284063	0.926537	0.350892	0.159789	-0.08806	1.03656	0.205565	-0.569399	0.463679	0.0154961	0.638392	-0.0138705	-0.018301	0.720332	-0.610078	-1.01635	-0.141835	-0.487868	-0.640965	0.406678	1.05328	0.521204	0.0899602	0.220141	0.0684849	0.916818	0.908931	-0.464373	-0.266495	0.918164	0.26944	0.165651	1.13481	0.027908	-0.472038	-0.505	-0.391479	-0.376747	-0.382775
-0.654933	0.278175	-0.582878	0.0251263	-0.112227	-0.581343	-0.0857541	0.199352	0.370866	-0.0488585	0.428854	0.252812	0.933032	0.32295	0.158914	-0.0930303	1.10527	0.267154	-0.556814	0.400968	0.0286186	0.581322	0.217849	-0.0175173	0.708715	-0.515913	-0.995525	-0.143176	-0.421704	-0.696112	0.384047	1.12118	0.59214	0.117766	0.314891	0.133425	0.907902	0.893416	-0.286472	-0.327587	0.900177	0.220542	0.149104	1.1286	-0.00892098	-0.485949	-0.448177	-0.395162	-0.409873	-0.419069
-0.679556	0.276692	-0.589524	0.0559874	-0.136132	-0.580777	-0.10468	0.185109	0.338699	-0.0469508	0.463795	0.216629	0.950623	0.322709	0.184119	-0.0569753	1.21718	0.26477	-0.507567	0.429729	0.0692827	0.515789	0.269956	0.0223442	0.687043	-0.483739	-0.995068	-0.148527	-0.404267	-0.701789	0.358978	1.20205	0.514046	0.261276	0.308171	0.129323	0.864782	0.855685	-0.26564	-0.352464	0.935186	0.146091	0.106617	1.14488	-0.000321567	-0.441927	-0.421909	-0.362842	-0.422588	-0.439005
-0.716898	0.267169	-0.584507	0.0406224	-0.148225	-0.559778	-0.111519	0.151608	0.318128	-0.0522763	0.486107	0.231686	0.952437	0.284776	0.197772	-0.0308383	1.30823	0.278299	-0.502491	0.371659	0.0773601	0.467283	0.281756	0.0973582	0.70557	-0.374705	-1.00722	-0.116325	-0.41663	-0.677863	0.328847	1.25547	0.475913	0.390345	0.412029	0.141895	0.77239	0.840646	-0.144773	-0.285454	0.899186	0.212627	0.218702	1.01195	-0.0203759	-0.372484	-0.488237	-0.343225	-0.401306	-0.560877
-0.70396	0.25812	-0.591344	-0.00308696	-0.180171	-0.567874	-0.137929	0.124892	0.312652	-0.0745908	0.490415	0.184108	0.930363	0.283629	0.180396	-0.0273338	1.32034	0.314151	-0.50809	0.358256	0.106318	0.400134	0.178541	0.128373	0.675288	-0.362069	-0.945536	-0.101443	-0.421182	-0.650454	0.364912	1.24708	0.34126	0.334537	0.385243	0.172446	0.744928	0.837733	-0.255331	-0.302341	0.86715	0.211105	0.128819	0.77457	0.0181922	-0.371063	-0.493778	-0.350948	-0.40096	-0.49469
-0.642947	0.250736	-0.588546	-0.0637811	-0.167919	-0.556613	-0.145545	0.0872713	0.312451	-0.0822383	0.519003	0.0547354	0.91889	0.288827	0.151067	0.009173	1.31378	0.304035	-0.525883	0.297624	0.126786	0.355425	0.133319	0.153352	0.687876	-0.38486	-0.909502	-0.0513027	-0.470523	-0.636126	0.4117	1.23789	0.326666	0.270201	0.384217	0.211481	0.613027	0.81351	-0.268559	-0.304032	0.773152	0.199706	0.161918	0.596169	-0.0503042	-0.357906	-0.388569	-0.359221	-0.395525	-0.512451
-0.581125	0.24816	-0.581479	-0.0418733	-0.208324	-0.570843	-0.196047	0.100096	0.281419	-0.0949587	0.515896	-0.00155039	0.906017	0.317557	0.10268	0.0332547	1.24243	0.289323	-0.528199	0.359804	0.169737	0.295144	0.202209	0.151331	0.614079	-0.342369	-0.871407	-0.0694123	-0.480573	-0.621781	0.426081	1.18983	0.446641	0.154268	0.372557	0.308926	0.588062	0.808147	-0.405756	-0.300646	0.747485	0.212023	0.16791	0.414164	-0.0576966	-0.380978	-0.325437	-0.369058	-0.453022	-0.397376
-0.579965	0.244897	-0.575941	-0.0147258	-0.208894	-0.586814	-0.20852	0.162638	0.220703	-0.103776	0.519982	-0.0192921	0.889389	0.279705	0.059562	0.0705809	1.20081	0.229408	-0.519312	0.397472	0.189003	0.262143	0.177487	0.176731	0.588551	-0.319225	-0.871479	-0.109512	-0.516592	-0.60953	0.431701	1.14802	0.726321	0.175047	0.392325	0.34574	0.544522	0.809834	-0.443468	-0.247757	0.702123	0.128711	0.339774	0.394866	-0.109934	-0.360808	-0.220048	-0.337861	-0.435946	-0.4566
-0.590551	0.220815	-0.570994	-0.0262734	-0.225899	-0.610148	-0.24147	0.160068	0.171253	-0.121058	0.466958	-0.00111906	0.887259	0.232218	0.0487129	0.0699162	1.18033	0.167297	-0.523528	0.412478	0.205927	0.233358	0.133192	0.173502	0.570608	-0.368597	-0.847661	-0.119671	-0.465389	-0.65854	0.444896	1.1083	0.983083	0.188944	0.345674	0.406308	0.559441	0.761288	-0.457028	-0.213184	0.67772	0.122042	0.45562	0.3274	-0.0749272	-0.364734	-0.226336	-0.352198	-0.455176	-0.505101
-0.595088	0.192392	-0.582983	-0.0577763	-0.197933	-0.600809	-0.230541	0.140938	0.141082	-0.134211	0.43879	-0.0765757	0.882478	0.186077	0.0401109	0.0695059	1.17746	0.111396	-0.490608	0.394061	0.196015	0.206912	0.0192833	0.162492	0.550123	-0.392302	-0.828056	-0.112371	-0.427766	-0.672818	0.462883	1.07039	1.11847	0.188011	0.257407	0.41299	0.464541	0.703245	-0.449206	-0.262429	0.639756	-0.0158184	0.555167	0.397809	-0.0578808	-0.383607	-0.224134	-0.377972	-0.437977	-0.601064
-0.593114	0.15656	-0.57317	-0.0466019	-0.216274	-0.592307	-0.227986	0.114798	0.135393	-0.156017	0.409021	-0.149512	0.861522	0.150551	0.0488662	0.0645441	1.11438	0.0845354	-0.478497	0.370004	0.176819	0.181124	0.023338	0.118215	0.475706	-0.39229	-0.787716	-0.115493	-0.399734	-0.691885	0.476701	1.01705	1.20142	0.130229	0.261148	0.438759	0.431957	0.627236	-0.470003	-0.318912	0.60982	-0.053588	0.647818	0.369973	-0.0288175	-0.424967	-0.2997	-0.43433	-0.460924	-0.560379
-0.636855	0.155193	-0.583036	-0.00578849	-0.20552	-0.584944	-0.252483	0.125817	0.133167	-0.159318	0.407508	-0.206617	0.83928	0.103399	0.0466591	0.0750489	1.03716	0.0652039	-0.465816	0.405682	0.13248	0.14114	0.103781	0.0945824	0.415656	-0.326214	-0.811053	-0.185829	-0.378374	-0.696396	0.556216	0.951245	1.30648	0.112657	0.312537	0.44089	0.468759	0.630563	-0.427592	-0.352149	0.576345	-0.173601	0.7208	0.359311	-0.0471608	-0.442208	-0.290675	-0.431632	-0.418966	-0.488548
[truncated: 37 more columns]

## Sheet: Coldplate
1	2	3	4	5	6	7	8	9	10	11	12	13	14	15	16	17	18	19	20	21	22	23	24	25	26	27	28	29	30	31	32	33	34	35	36	37	38	39	40	41	42	43	44	45	46	47	48	49	50
-0.36791	-0.53712	-0.43883	0.200446	-0.4017	0.155988	-0.44222	0.09657	-0.21519	-0.74133	-0.06098	-0.38178	-0.83946	-0.66419	-0.98695	-0.13269	-0.38062	0.217794	-0.86315	0.186251	0.499761	-0.19009	-0.7099	-0.26785	-0.01791	0.205808	-0.08251	-0.37143	-0.62021	0.502103	-0.45924	0.197619	-0.06183	0.183409	-0.57081	0.014734	0.427472	-0.15288	0.577804	0.12358	-0.02597	-0.11262	0.119294	0.362342	0.011892	0.106997	0.187658	0.645186	0.377879	0.255104
-0.35624	-0.54706	-0.45469	0.213236	-0.38668	0.236759	-0.43319	0.116265	-0.22226	-0.69756	-0.06471	-0.39373	-0.83247	-0.64845	-1.00046	-0.0488	-0.35847	0.229481	-0.84339	0.084722	0.446576	-0.14341	-0.72276	-0.22866	-0.0197	0.321693	-0.0883	-0.37936	-0.63286	0.337496	-0.47558	0.204871	-0.09306	0.242297	-0.52318	0.05075	0.440223	-0.12774	0.47511	0.143332	0.032462	-0.08838	0.070824	0.36712	-0.00131	0.089139	0.178634	0.539135	0.366175	0.286052
-0.35074	-0.55481	-0.45912	0.211232	-0.38668	0.212187	-0.41566	0.173635	-0.17592	-0.65418	-0.00946	-0.39802	-0.69264	-0.67038	-0.95035	0.072647	-0.34521	0.203167	-0.87061	0.034977	0.412594	-0.15456	-0.72569	-0.27972	-0.08772	0.32876	-0.11246	-0.40844	-0.61297	0.354986	-0.40508	0.187087	-0.09392	0.217318	-0.55517	0.132256	0.344389	-0.1202	0.519498	0.172717	-0.02465	-0.0866	0.100737	0.336361	-0.02459	0.07204	0.192172	0.552153	0.360069	0.216291
-0.33467	-0.53432	-0.48062	0.182669	-0.40367	0.238197	-0.32906	0.213753	-0.16679	-0.54967	0.030468	-0.43543	-0.6573	-0.66483	-0.97168	0.047221	-0.32215	0.16141	-0.88202	0.054653	0.386994	-0.16696	-0.65529	-0.26067	-0.0571	0.39305	-0.121	-0.35881	-0.544	0.30325	-0.41525	0.174061	-0.13195	0.202678	-0.54466	0.108173	0.323666	-0.09264	0.524174	0.227072	-0.03129	-0.08729	0.06506	0.333041	-0.06895	0.066925	0.232621	0.640635	0.301911	0.218942
-0.32528	-0.52092	-0.4443	0.106015	-0.40606	0.180935	-0.3504	0.275499	-0.20397	-0.46805	0.055421	-0.47498	-0.59731	-0.70314	-0.97972	-0.03484	-0.30272	0.154822	-0.86037	0.093722	0.406086	-0.19721	-0.65103	-0.23027	-0.06475	0.429099	-0.12552	-0.37246	-0.51587	0.436858	-0.44502	0.213316	-0.15258	0.191365	-0.5782	-0.01698	0.305462	-0.06569	0.473085	0.307589	-0.06094	-0.08814	0.12155	0.36932	-0.09243	0.083592	0.288045	0.732707	0.25133	0.150107
-0.32707	-0.53061	-0.44166	0.040719	-0.40408	0.19739	-0.36172	0.281337	-0.27845	-0.43377	0.01586	-0.4844	-0.62662	-0.69153	-1.00376	-0.22525	-0.2504	0.170521	-0.89205	0.077202	0.428157	-0.16909	-0.59914	-0.20238	-0.02927	0.47053	-0.09865	-0.3769	-0.50969	0.451581	-0.44197	0.210184	-0.15805	0.223487	-0.53455	0.011675	0.36978	-0.02183	0.462067	0.312452	-0.0432	-0.09546	0.122234	0.403364	-0.09244	0.067164	0.332105	0.756964	0.234303	0.158672
-0.3247	-0.53135	-0.41325	0.085084	-0.39097	0.157328	-0.38352	0.25004	-0.2814	-0.43328	0.000898	-0.49338	-0.66853	-0.75138	-1.01789	-0.13212	-0.16755	0.138108	-0.971	0.160694	0.438239	-0.12903	-0.59344	-0.21301	0.025008	0.45763	-0.0741	-0.41353	-0.54097	0.530583	-0.38388	0.191503	-0.15457	0.279234	-0.53263	0.012085	0.377957	-0.02115	0.447628	0.307698	-0.08683	-0.09269	0.17717	0.404052	-0.08688	0.066388	0.430312	0.722222	0.28894	0.136686
-0.33205	-0.54862	-0.36663	0.125999	-0.37488	0.151738	-0.29782	0.235355	-0.24946	-0.4706	-0.04418	-0.44838	-0.647	-0.72077	-0.99608	-0.0224	-0.11372	0.10022	-1.00502	0.110636	0.4035	-0.13578	-0.59571	-0.25126	0.046057	0.443249	-0.09544	-0.43553	-0.55867	0.49534	-0.31333	0.194601	-0.12605	0.300964	-0.47552	0.072415	0.402844	-0.03673	0.464707	0.320503	-0.1103	-0.08122	0.165075	0.389725	-0.08578	0.047174	0.55703	0.742705	0.33539	0.137717
-0.31547	-0.55633	-0.35409	0.161073	-0.38086	0.09028	-0.26634	0.161749	-0.29495	-0.54986	-0.0355	-0.40486	-0.59526	-0.74551	-1.00744	0.017583	-0.0438	0.029353	-0.97912	0.142331	0.396975	-0.11903	-0.64543	-0.22334	0.040393	0.437952	-0.09084	-0.40683	-0.5921	0.464633	-0.19017	0.207956	-0.15057	0.302379	-0.49527	0.083651	0.419099	-0.04939	0.375129	0.29738	-0.11601	-0.03729	0.157422	0.369159	-0.09446	0.071467	0.627887	0.654271	0.320809	0.192206
-0.31839	-0.58633	-0.32841	0.136754	-0.37941	0.060029	-0.28087	0.140892	-0.28495	-0.61479	-0.02181	-0.34553	-0.48663	-0.71715	-0.97319	-0.02529	-0.02478	-0.00576	-0.92847	0.040804	0.374378	-0.06154	-0.71729	-0.21291	-0.04379	0.510341	-0.07218	-0.39417	-0.59395	0.409668	-0.14255	0.232268	-0.20641	0.3494	-0.49051	0.039265	0.371195	-0.04916	0.477635	0.31156	-0.092	-0.03679	0.117342	0.306769	-0.08326	0.104122	0.638512	0.683466	0.286571	0.212896
-0.32932	-0.63094	-0.40535	0.180374	-0.41805	0.030211	-0.31513	0.07833	-0.31524	-0.65087	-0.02345	-0.3596	-0.57582	-0.75095	-0.98016	-0.01733	0.005411	-0.06314	-0.95548	-0.08025	0.378339	0.018791	-0.72955	-0.20659	-0.01874	0.62879	-0.0077	-0.35571	-0.56223	0.483514	-0.18934	0.20338	-0.24554	0.383335	-0.50476	-0.04716	0.394118	-0.0549	0.5045	0.287522	-0.09013	-0.04003	0.166059	0.257905	-0.08215	0.128102	0.563275	0.783238	0.27685	0.25308
-0.37608	-0.65748	-0.44237	0.15262	-0.4358	-0.02222	-0.28595	0.064987	-0.2754	-0.61641	-0.02568	-0.37764	-0.66142	-0.75052	-0.97668	0.067714	0.00657	-0.04498	-0.93336	-0.11087	0.340806	0.036323	-0.74082	-0.22824	0.000585	0.693934	-0.01433	-0.37962	-0.53042	0.464479	-0.28455	0.163282	-0.2275	0.457456	-0.47615	-0.19806	0.354302	-0.0767	0.601392	0.346276	-0.07037	-0.09306	0.153299	0.220554	-0.08341	0.11202	0.547634	0.931155	0.287011	0.219868
-0.38775	-0.67139	-0.43266	0.157002	-0.46714	-0.02627	-0.25735	0.060219	-0.32941	-0.58384	-0.05549	-0.37697	-0.84227	-0.7419	-0.95972	0.067126	-0.04842	-0.03816	-0.99385	-0.14543	0.347472	0.034364	-0.72923	-0.28745	0.078787	0.738621	-0.03163	-0.37599	-0.5163	0.435134	-0.27806	0.104353	-0.21727	0.465545	-0.50012	-0.30397	0.413096	-0.09506	0.553487	0.307418	-0.09803	-0.08784	0.122502	0.185488	-0.10175	0.118662	0.47773	0.988607	0.28518	0.235181
-0.40908	-0.654	-0.4372	0.100894	-0.47243	-0.04985	-0.24574	0.013851	-0.32519	-0.66317	-0.0494	-0.37709	-0.82968	-0.71128	-0.97894	-0.06917	-0.12422	-0.0366	-1.00595	-0.00542	0.34254	0.004478	-0.75088	-0.3362	0.055149	0.610358	-0.05534	-0.40589	-0.50737	0.278733	-0.24225	0.079307	-0.26273	0.431967	-0.60583	-0.21649	0.407204	-0.06803	0.678467	0.331411	-0.07482	-0.11331	0.01922	0.113892	-0.12568	0.099371	0.480515	1.011	0.241073	0.229771
-0.3977	-0.6278	-0.41072	0.099485	-0.46058	-0.0203	-0.3219	0.005033	-0.30249	-0.66314	-0.08487	-0.35781	-0.79477	-0.68353	-0.9576	-0.26061	-0.21602	-0.09539	-0.97901	0.050308	0.351925	0.027084	-0.75553	-0.366	0.078133	0.525098	-0.03029	-0.39628	-0.45698	0.244381	-0.25278	0.090223	-0.32535	0.375109	-0.66453	-0.19801	0.380827	-0.05524	0.529136	0.294132	-0.04333	-0.10774	-0.01998	0.085745	-0.14234	0.102513	0.409677	0.994702	0.226267	0.203807
-0.37098	-0.65413	-0.40961	0.014522	-0.43885	0.006422	-0.31716	0.02996	-0.29963	-0.65907	-0.09465	-0.32226	-0.67856	-0.69608	-0.98937	-0.3827	-0.19916	-0.1132	-0.92924	0.129256	0.326212	0.000705	-0.76537	-0.29043	0.111385	0.414974	-0.03134	-0.40076	-0.41961	0.269185	-0.24386	0.114665	-0.34084	0.355364	-0.68975	-0.09251	0.362861	-0.06386	0.452073	0.374863	0.005177	-0.15722	0.020394	0.12234	-0.16094	0.069301	0.357282	0.988217	0.188649	0.216287
-0.35612	-0.65893	-0.35327	-0.04486	-0.41096	0.024786	-0.38928	0.066759	-0.26235	-0.57966	-0.06936	-0.302	-0.57094	-0.69589	-0.96863	-0.36535	-0.16078	-0.14294	-0.88718	-0.01678	0.303501	7.05e-05	-0.77468	-0.27861	0.110423	0.465537	-0.04699	-0.37296	-0.39841	0.280063	-0.19623	0.121366	-0.31653	0.327483	-0.61188	0.0341	0.302233	-0.10292	0.366419	0.419033	-0.02039	-0.15485	0.064958	0.188747	-0.14847	0.099949	0.273317	0.999614	0.170313	0.227553
-0.34726	-0.61548	-0.31512	-0.07723	-0.43069	0.038325	-0.36468	0.096437	-0.28831	-0.6123	-0.09029	-0.27347	-0.62112	-0.72344	-0.97807	-0.28122	-0.15118	-0.07467	-0.88168	-0.15973	0.298799	-0.06115	-0.75242	-0.27236	0.07466	0.505732	-0.11407	-0.36327	-0.39009	0.206654	-0.21852	0.121594	-0.26455	0.279542	-0.59072	0.196352	0.30003	-0.13671	0.419287	0.454929	-0.08261	-0.16959	0.139848	0.217875	-0.13355	0.106054	0.25073	1.02329	0.189666	0.290685
-0.3117	-0.58145	-0.31478	-0.04942	-0.44594	-0.006	-0.3337	0.061951	-0.3011	-0.68605	-0.13204	-0.30436	-0.68468	-0.73861	-0.98664	-0.28095	-0.17523	-0.03966	-0.84931	-0.2728	0.299487	0.033885	-0.70522	-0.29344	0.044934	0.568427	-0.12628	-0.36318	-0.41546	0.104593	-0.28009	0.080204	-0.21628	0.279213	-0.56398	0.083287	0.260728	-0.12709	0.460887	0.45744	-0.1137	-0.16176	0.123147	0.270096	-0.1112	0.119404	0.286517	1.01422	0.205032	0.334158
-0.27861	-0.57168	-0.31046	0.000771	-0.41068	-0.01409	-0.27626	0.018515	-0.3238	-0.76421	-0.23425	-0.27895	-0.72891	-0.73994	-1.00718	-0.36645	-0.27956	0.085238	-0.8356	-0.27112	0.32059	0.086263	-0.64084	-0.27576	0.0466	0.491679	-0.13454	-0.38743	-0.4681	0.059447	-0.39353	0.063344	-0.21622	0.263635	-0.62391	-0.06278	0.225472	-0.15501	0.424187	0.421332	-0.07339	-0.17382	0.17607	0.315657	-0.13905	0.12266	0.312616	1.00476	0.241492	0.314043
-0.23403	-0.58635	-0.34154	0.038615	-0.3678	-0.04569	-0.2243	-0.03409	-0.26847	-0.75405	-0.28868	-0.3362	-0.742	-0.69666	-1.00522	-0.47689	-0.29165	0.04166	-0.7745	-0.17666	0.307486	0.208768	-0.6594	-0.28186	0.041319	0.458349	-0.11383	-0.39878	-0.50006	0.136406	-0.42872	0.035655	-0.23296	0.319051	-0.63311	-0.11699	0.214074	-0.19303	0.481344	0.412265	-0.02526	-0.18411	0.123097	0.388554	-0.15195	0.126979	0.300291	0.988713	0.250146	0.339881
-0.27286	-0.5601	-0.39885	0.053765	-0.34047	-0.05084	-0.25638	-0.083	-0.15089	-0.72111	-0.31444	-0.37172	-0.78691	-0.68367	-0.9576	-0.3858	-0.26517	-0.00647	-0.70449	-0.07241	0.258992	0.208648	-0.65216	-0.26433	-0.03484	0.41989	-0.10988	-0.4088	-0.54752	0.215941	-0.47695	0.039901	-0.26362	0.336901	-0.61114	-0.0904	0.205722	-0.25954	0.41703	0.368511	-0.00988	-0.21104	0.123486	0.4434	-0.15595	0.112746	0.261539	0.920822	0.261254	0.346787
-0.3067	-0.53582	-0.43082	0.062268	-0.35326	-0.0877	-0.23517	-0.0881	-0.07957	-0.67501	-0.29664	-0.42565	-0.92776	-0.65595	-0.90239	-0.41361	-0.2232	-0.10038	-0.60958	0.03148	0.237316	0.266309	-0.58035	-0.28679	-0.0899	0.509165	-0.0893	-0.39756	-0.57167	0.341286	-0.43563	0.017861	-0.25341	0.348104	-0.58021	-0.13291	0.221579	-0.30733	0.35116	0.3776	-0.03937	-0.2254	0.096339	0.56441	-0.12679	0.108274	0.261553	0.881372	0.279183	0.353089
-0.33452	-0.56305	-0.43686	0.068418	-0.35584	-0.09808	-0.27023	-0.10043	0.039737	-0.67999	-0.24804	-0.43344	-0.97213	-0.64404	-0.86906	-0.23679	-0.19846	-0.09641	-0.58747	0.098349	0.178383	0.264864	-0.53983	-0.2917	-0.10247	0.511286	-0.07419	-0.3996	-0.66108	0.34075	-0.44213	0.004815	-0.264	0.363109	-0.55383	-0.25687	0.198541	-0.33218	0.417988	0.350587	-0.0236	-0.23693	0.159299	0.642133	-0.14086	0.116442	0.326943	0.827965	0.284217	0.323779
-0.35409	-0.63132	-0.39571	0.177883	-0.38842	-0.11619	-0.22571	-0.16218	0.047644	-0.66244	-0.1915	-0.44552	-0.94836	-0.60424	-0.87471	-0.22201	-0.2571	-0.12685	-0.58901	-0.00137	0.19737	0.282222	-0.58567	-0.30801	-0.07415	0.529504	-0.06222	-0.35274	-0.70322	0.385112	-0.3882	0.004396	-0.25595	0.437697	-0.55137	-0.09731	0.249286	-0.31522	0.521216	0.374906	-0.00838	-0.24287	0.216827	0.698359	-0.18515	0.138724	0.423464	0.836906	0.320854	0.348679
-0.34872	-0.64168	-0.42754	0.219635	-0.41617	-0.12954	-0.24153	-0.20557	0.084091	-0.6159	-0.21763	-0.45354	-0.93027	-0.61719	-0.88676	-0.1352	-0.24199	-0.11174	-0.58536	-0.01788	0.199992	0.255081	-0.6981	-0.29139	-0.03441	0.490555	-0.10033	-0.36175	-0.70594	0.348313	-0.39892	0.007816	-0.29414	0.484878	-0.52996	-0.07053	0.311334	-0.2656	0.558808	0.362762	0.045252	-0.25187	0.203384	0.72177	-0.23149	0.127662	0.483792	0.76613	0.350373	0.404775
-0.33866	-0.61411	-0.39839	0.220717	-0.43636	-0.13347	-0.23811	-0.25282	0.082895	-0.61237	-0.24166	-0.44346	-0.93375	-0.62576	-0.86165	-0.32339	-0.28657	-0.09256	-0.66922	-0.05007	0.274656	0.238382	-0.69012	-0.28344	-0.07771	0.514743	-0.14575	-0.34215	-0.68821	0.466765	-0.37952	-0.02191	-0.30067	0.473149	-0.54306	0.138807	0.369507	-0.22046	0.495618	0.39	0.023006	-0.24649	0.16009	0.780269	-0.24436	0.141441	0.542997	0.702561	0.345866	0.448378
-0.31185	-0.55885	-0.41047	0.114443	-0.42257	-0.15314	-0.28415	-0.17779	0.115546	-0.70486	-0.30506	-0.41747	-0.94571	-0.60988	-0.88985	-0.35612	-0.3432	-0.03353	-0.59802	-0.00403	0.241906	0.205076	-0.59802	-0.3109	-0.12882	0.43847	-0.22261	-0.38309	-0.64709	0.364572	-0.44234	-0.03722	-0.27074	0.361213	-0.62147	-0.03088	0.309101	-0.20064	0.490094	0.370899	0.01565	-0.24339	0.121907	0.839205	-0.2507	0.147271	0.548317	0.616907	0.277586	0.404149
-0.29979	-0.59682	-0.38694	0.069187	-0.43874	-0.18677	-0.33494	-0.1885	0.073201	-0.68312	-0.36675	-0.41498	-0.95075	-0.56943	-0.92718	-0.2704	-0.38029	-0.04005	-0.60019	0.017094	0.236511	0.122536	-0.50339	-0.28398	-0.17287	0.430804	-0.30254	-0.41622	-0.64858	0.355018	-0.53745	-0.06779	-0.24623	0.302528	-0.61102	-0.02198	0.293534	-0.19725	0.525996	0.299702	-0.01087	-0.22902	0.137716	0.901741	-0.24698	0.179713	0.594402	0.585995	0.254057	0.346583
-0.29193	-0.60731	-0.40162	0.117256	-0.45271	-0.29975	-0.30687	-0.25165	0.020005	-0.6882	-0.41513	-0.43401	-0.95742	-0.57275	-0.97267	-0.06886	-0.38074	-0.07726	-0.61205	0.090137	0.18153	0.058313	-0.53021	-0.25793	-0.1598	0.378976	-0.35665	-0.42716	-0.68517	0.294678	-0.53017	-0.07202	-0.27182	0.282077	-0.62662	-0.15471	0.361067	-0.19075	0.493764	0.281948	-0.03131	-0.24242	0.144923	0.934296	-0.26301	0.182638	0.62416	0.515413	0.255864	0.288204
-0.29941	-0.65798	-0.44096	0.207946	-0.47519	-0.357	-0.30866	-0.39224	0.009027	-0.59649	-0.48729	-0.46459	-0.92672	-0.59069	-0.97597	-0.02962	-0.35411	-0.08266	-0.65439	0.179686	0.228555	-0.04744	-0.60012	-0.18975	-0.13459	0.44513	-0.41046	-0.45872	-0.72676	0.351788	-0.5082	-0.07422	-0.30266	0.264699	-0.56278	-0.02884	0.455826	-0.20904	0.523632	0.250096	-0.05528	-0.21663	0.166259	0.956335	-0.25533	0.21171	0.739334	0.496926	0.330624	0.271833
-0.29595	-0.66277	-0.48008	0.257012	-0.47115	-0.37332	-0.22497	-0.46753	0.040003	-0.63759	-0.41745	-0.5075	-0.90945	-0.60602	-0.94174	-0.07033	-0.4026	-0.07138	-0.71016	0.264614	0.215436	-0.02834	-0.65194	-0.18993	-0.10661	0.421504	-0.4364	-0.40989	-0.73996	0.335623	-0.43067	-0.07875	-0.32086	0.276781	-0.60299	-0.02154	0.525143	-0.2086	0.531168	0.257014	-0.03607	-0.20619	0.161632	0.981667	-0.25792	0.227986	0.842357	0.515739	0.35815	0.274516
-0.29194	-0.67685	-0.48285	0.232444	-0.49196	-0.32145	-0.20799	-0.52492	-0.01177	-0.60336	-0.42394	-0.5265	-0.96793	-0.57931	-0.93875	-0.09989	-0.45976	-0.07777	-0.69093	0.243792	0.243324	-0.00531	-0.65439	-0.16621	-0.06059	0.448215	-0.45876	-0.4037	-0.70463	0.358777	-0.51103	-0.05383	-0.32963	0.300181	-0.58954	-0.07598	0.509677	-0.23542	0.519508	0.219496	-0.00987	-0.16032	0.189777	1.0351	-0.2549	0.268565	0.964413	0.630199	0.378745	0.316082
-0.28564	-0.64706	-0.46399	0.143125	-0.4694	-0.33187	-0.14221	-0.49629	0.037981	-0.54348	-0.34419	-0.5225	-0.99708	-0.6201	-0.89354	-0.17698	-0.50284	-0.13713	-0.70369	0.274082	0.253012	0.093881	-0.65749	-0.21506	-0.04416	0.415355	-0.41666	-0.38637	-0.66502	0.363315	-0.48947	-0.06302	-0.3809	0.353672	-0.68725	-0.0925	0.563782	-0.22013	0.418983	0.209714	0.057588	-0.15987	0.235577	1.13747	-0.2524	0.29545	1.04944	0.763008	0.381636	0.362482
-0.27182	-0.60296	-0.43737	0.035814	-0.47629	-0.29225	-0.18183	-0.42631	0.052201	-0.44765	-0.35651	-0.54525	-1.07426	-0.64177	-0.87174	-0.1509	-0.4742	-0.19095	-0.66173	0.151045	0.26952	0.085354	-0.6412	-0.24497	-0.06404	0.420477	-0.37178	-0.39929	-0.65444	0.370614	-0.471	-0.04949	-0.38723	0.386827	-0.70594	-0.05815	0.606717	-0.23959	0.439192	0.239857	0.02609	-0.17457	0.298117	1.21269	-0.26872	0.342365	1.07068	0.8317	0.327652	0.423986
-0.26802	-0.64622	-0.50093	0.010443	-0.43422	-0.30882	-0.15514	-0.34225	0.061258	-0.38907	-0.3446	-0.54775	-1.04264	-0.63467	-0.88812	-0.32412	-0.45347	-0.22216	-0.56842	0.178318	0.289857	0.074197	-0.59295	-0.2494	-0.13091	0.397188	-0.34323	-0.44257	-0.58894	0.281355	-0.39446	-0.08334	-0.35927	0.347349	-0.71624	-0.033	0.624725	-0.21543	0.541981	0.209632	0.014055	-0.18864	0.318093	1.25127	-0.27016	0.359666	1.03729	0.837762	0.324483	0.39899
-0.25935	-0.67495	-0.54437	-0.03733	-0.4406	-0.28652	-0.17485	-0.32382	-0.07783	-0.43692	-0.35611	-0.59762	-1.07107	-0.61815	-0.91392	-0.39337	-0.45095	-0.25463	-0.59342	0.171807	0.280922	0.005122	-0.59764	-0.2561	-0.15711	0.340307	-0.35397	-0.5128	-0.5649	0.278168	-0.43212	-0.08608	-0.29298	0.313356	-0.67613	0.024863	0.585028	-0.1922	0.594077	0.222977	-0.02811	-0.19396	0.284351	1.26371	-0.29298	0.357913	0.945068	0.814272	0.328363	0.360273
-0.25074	-0.70188	-0.58897	-0.02657	-0.44081	-0.32833	-0.13282	-0.37748	-0.18324	-0.57384	-0.44672	-0.57176	-1.05361	-0.63084	-0.98301	-0.51972	-0.55612	-0.2388	-0.6308	0.326224	0.285285	-0.02948	-0.5837	-0.24695	-0.16664	0.336722	-0.37404	-0.63231	-0.5132	0.173385	-0.46779	-0.10869	-0.268	0.259102	-0.64943	0.021562	0.592044	-0.16454	0.603323	0.211275	-0.02677	-0.17487	0.226268	1.26609	-0.2862	0.332077	0.993159	0.828343	0.391219	0.307718
-0.24221	-0.68625	-0.58514	-0.0476	-0.46301	-0.31947	-0.19216	-0.36125	-0.13252	-0.56616	-0.48684	-0.58564	-1.02796	-0.66565	-0.96123	-0.44272	-0.56393	-0.19148	-0.63739	0.397619	0.245516	-0.14998	-0.58849	-0.15941	-0.07656	0.36677	-0.39751	-0.68525	-0.49203	0.141265	-0.43229	-0.13688	-0.28405	0.29899	-0.59915	0.086097	0.632594	-0.13874	0.558125	0.156742	0.018928	-0.17093	0.117018	1.31034	-0.30703	0.303775	1.01084	0.858219	0.389728	0.27579
-0.23704	-0.66218	-0.59892	-0.05492	-0.51027	-0.27095	-0.16781	-0.35337	-0.05703	-0.45626	-0.50441	-0.59014	-0.98084	-0.66504	-0.93526	-0.42554	-0.51687	-0.17302	-0.64605	0.3894	0.206527	-0.22951	-0.5673	-0.0915	-0.03951	0.39716	-0.39747	-0.70785	-0.41755	0.090136	-0.39045	-0.15298	-0.32237	0.338584	-0.56353	-0.00991	0.665638	-0.13476	0.512135	0.095574	0.057747	-0.18366	0.052345	1.34936	-0.31027	0.278007	1.06647	0.808657	0.349958	0.216634
-0.27893	-0.65481	-0.81212	-0.17157	-0.4578	-0.23406	-0.42503	-0.59143	0.019127	-0.40193	-0.44675	-0.80904	-0.85878	-0.61728	-0.9156	-0.47118	-0.41894	-0.05696	-0.61246	0.281846	0.210231	-0.30873	-0.59143	-0.00886	0.010472	0.373265	-0.3499	-0.59665	-0.34138	0.144159	-0.30973	-0.13917	-0.36365	0.358337	-0.60982	-0.02371	0.737361	-0.12424	0.503123	0.067248	0.104309	-0.13568	-0.00027	1.31363	-0.3288	0.269421	1.01959	0.742113	0.160488	0.18261
-0.27292	-0.62394	-0.82577	-0.24263	-0.46314	-0.23966	-0.40729	-0.62878	-0.06914	-0.48639	-0.43721	-0.81863	-0.83035	-0.61421	-0.92402	-0.48059	-0.48877	-0.09539	-0.68877	0.230088	0.21686	-0.28023	-0.60236	-0.08174	-0.0483	0.344854	-0.30478	-0.59009	-0.2885	0.166823	-0.33062	-0.12404	-0.39501	0.391062	-0.64851	-0.05929	0.697051	-0.12925	0.354434	0.115192	0.126829	-0.14131	0.00344	1.31202	-0.32346	0.326878	1.00098	0.673563	0.118181	0.170444
-0.25697	-0.62407	-0.85669	-0.31295	-0.41584	-0.27546	-0.50423	-0.72022	-0.04428	-0.61097	-0.40658	-0.8465	-0.77426	-0.59714	-0.92994	-0.41651	-0.60431	-0.08059	-0.64773	0.186368	0.237199	-0.23955	-0.61089	-0.05152	-0.04883	0.282584	-0.26901	-0.52799	-0.29775	0.110443	-0.33765	-0.10179	-0.4304	0.327971	-0.68158	-0.01238	0.701051	-0.16534	0.413308	0.12406	0.140871	-0.12351	-0.01071	1.28676	-0.3419	0.385259	0.966616	0.62225	0.053033	0.158937
-0.23422	-0.64242	-0.65771	-0.27635	-0.46252	-0.29674	-0.3131	-0.51505	-0.04877	-0.55624	-0.39166	-0.62526	-0.72458	-0.61392	-0.94737	-0.38352	-0.73471	-0.16943	-0.6583	0.23272	0.256888	-0.25504	-0.60225	-0.08582	-0.08072	0.19577	-0.29928	-0.55998	-0.29754	0.172547	-0.40754	-0.08353	-0.47173	0.321881	-0.68151	-0.0496	0.607477	-0.18964	0.415124	0.164402	0.202291	-0.14558	0.053058	1.35679	-0.35438	0.450822	0.966626	0.566681	0.11891	0.105992
-0.29863	-0.61167	-0.73693	-0.32935	-0.45709	-0.29405	-0.34002	-0.54306	0.031397	-0.47495	-0.38293	-0.65232	-0.70307	-0.59083	-0.92246	-0.18099	-0.74874	-0.17481	-0.59652	0.267323	0.234141	-0.29884	-0.62411	-0.05147	-0.0514	0.144718	-0.32729	-0.53692	-0.24237	0.187328	-0.52497	-0.06958	-0.53298	0.291753	-0.70494	0.031719	0.634746	-0.24087	0.647768	0.194513	0.228733	-0.12915	0.082584	1.34407	-0.37273	0.45695	0.919176	0.520107	0.075931	0.053099
-0.37004	-0.57181	-0.76538	-0.38412	-0.4588	-0.26678	-0.30347	-0.49374	-0.01448	-0.38479	-0.35815	-0.65406	-0.72883	-0.56774	-0.90472	-0.07508	-0.70415	-0.16027	-0.6064	0.282269	0.19185	-0.31264	-0.61212	-0.10042	-0.09292	0.165827	-0.3366	-0.61111	-0.14235	0.157387	-0.5386	-0.06436	-0.55653	0.31853	-0.71524	0.117294	0.648212	-0.24047	0.653059	0.233437	0.259157	-0.11648	0.063854	1.35567	-0.35437	0.453366	0.847987	0.470153	0.124379	0.077992
-0.39896	-0.5068	-0.75175	-0.44725	-0.459	-0.26989	-0.28431	-0.4864	-0.00649	-0.38713	-0.33329	-0.67719	-0.72905	-0.5545	-0.83866	-0.0039	-0.59383	-0.16293	-0.52985	0.341036	0.16618	-0.23548	-0.68462	-0.10138	-0.11742	0.209197	-0.30988	-0.63951	-0.04865	0.128555	-0.53724	-0.08346	-0.5341	0.290227	-0.71549	0.203072	0.658605	-0.26209	0.73777	0.2097	0.160345	-0.14189	-0.04002	1.38595	-0.33979	0.436947	0.755637	0.396723	0.178674	0.072323
-0.37068	-0.55028	-0.67748	-0.46021	-0.45195	-0.27255	-0.37277	-0.49665	-0.03876	-0.36136	-0.34242	-0.67167	-0.79723	-0.54222	-0.84233	-0.2208	-0.5203	-0.14883	-0.45929	0.302443	0.192023	-0.21189	-0.73127	-0.09105	-0.12389	0.197943	-0.30801	-0.63851	-0.02761	0.029621	-0.47417	-0.03131	-0.51539	0.234722	-0.69619	0.16697	0.660156	-0.27512	0.662193	0.198712	0.1106	-0.14463	-0.0864	1.42856	-0.34703	0.405039	0.691536	0.341224	0.171019	0.072736
-0.35591	-0.55239	-0.60554	-0.43404	-0.46026	-0.33286	-0.37117	-0.55064	-0.10901	-0.40314	-0.4323	-0.64563	-0.92576	-0.55118	-0.89317	-0.3071	-0.46168	-0.13024	-0.39331	0.369616	0.196597	-0.24391	-0.76173	-0.10909	-0.14253	0.210135	-0.37276	-0.62516	-0.0148	0.072012	-0.50509	-0.03101	-0.5179	0.164131	-0.65742	0.031972	0.616853	-0.28691	0.62127	0.199288	0.059093	-0.12237	-0.104	1.43131	-0.35665	0.418862	0.672237	0.346522	0.168958	0.021878
-0.37156	-0.58682	-0.65252	-0.41078	-0.47975	-0.31761	-0.4396	-0.53785	-0.15155	-0.39369	-0.46822	-0.67922	-0.93448	-0.5421	-0.91807	-0.24196	-0.41577	-0.15136	-0.42881	0.325315	0.169892	-0.31639	-0.72996	-0.1202	-0.18826	0.225418	-0.43164	-0.65214	0.001105	0.06931	-0.54206	-0.0316	-0.54211	0.188909	-0.61679	-0.01148	0.679905	-0.29371	0.500978	0.261321	0.028074	-0.11308	-0.10331	1.39487	-0.36119	0.419991	0.570151	0.336359	0.177281	0.063344
-0.3612	-0.55749	-0.67342	-0.37936	-0.48771	-0.309	-0.35047	-0.55794	-0.14298	-0.4935	-0.43065	-0.69863	-0.82594	-0.5469	-0.95284	-0.13453	-0.36035	-0.12185	-0.43579	0.319049	0.125024	-0.36723	-0.72619	-0.18289	-0.28324	0.209971	-0.5187	-0.66131	0.015931	0.115512	-0.51996	-0.08571	-0.52755	0.151981	-0.65289	-0.02614	0.654147	-0.29559	0.52292	0.280985	-0.05873	-0.10259	-0.13731	1.37676	-0.32732	0.448983	0.572166	0.337969	0.234948	0.059027
-0.37047	-0.55666	-0.72493	-0.31408	-0.49619	-0.29185	-0.34198	-0.57865	-0.08716	-0.52084	-0.42013	-0.74142	-0.74137	-0.51596	-0.93638	-0.06126	-0.33062	-0.09544	-0.44163	0.220158	0.104936	-0.32281	-0.7764	-0.13302	-0.29959	0.152292	-0.50163	-0.64885	0.038303	0.11792	-0.48628	-0.10006	-0.52028	0.141462	-0.6367	0.084627	0.681529	-0.31496	0.599956	0.242983	-0.09774	-0.11476	-0.19536	1.36429	-0.30553	0.460775	0.548952	0.27895	0.278219	0.088591
-0.36353	-0.53211	-0.72426	-0.26957	-0.49189	-0.321	-0.29484	-0.64682	-0.08973	-0.56164	-0.43478	-0.76393	-0.8401	-0.50695	-0.90906	-0.04143	-0.28835	-0.06303	-0.43347	0.186677	0.075879	-0.28427	-0.84297	-0.13743	-0.2797	0.053389	-0.55507	-0.62331	-0.00547	0.111754	-0.41424	-0.1053	-0.53161	0.019634	-0.66044	0.145101	0.643535	-0.33141	0.628116	0.169751	-0.08435	-0.11117	-0.22909	1.33696	-0.29033	0.468745	0.586928	0.274874	0.310523	0.013316
-0.40676	-0.58459	-0.74291	-0.30855	-0.49978	-0.32387	-0.29989	-0.70776	-0.07408	-0.54979	-0.45508	-0.8066	-0.8738	-0.49931	-0.8989	-0.12452	-0.25576	-0.066	-0.4375	0.056858	0.092749	-0.26568	-0.8741	-0.10429	-0.26818	0.014441	-0.57817	-0.64867	-0.00431	0.165434	-0.35516	-0.09079	-0.49828	-0.02469	-0.67642	0.247675	0.640488	-0.32031	0.621091	0.182757	-0.04846	-0.12995	-0.1696	1.32845	-0.28663	0.441216	0.606004	0.333312	0.342673	0.042833
-0.40706	-0.55831	-0.74502	-0.3342	-0.50582	-0.34862	-0.2337	-0.71668	-0.12084	-0.46709	-0.42833	-0.83716	-0.79649	-0.53443	-0.89631	-0.08462	-0.17667	-0.11319	-0.50011	0.050978	0.08128	-0.2993	-0.87013	-0.14539	-0.23436	0.043675	-0.62714	-0.6554	0.007587	0.209366	-0.34646	-0.07806	-0.48364	0.011209	-0.71171	0.311248	0.65602	-0.28053	0.593012	0.182739	-0.02988	-0.12328	-0.11353	1.32052	-0.27939	0.419894	0.647738	0.409928	0.34447	0.081923
-0.38242	-0.58815	-0.72992	-0.33007	-0.51708	-0.35433	-0.10969	-0.74354	-0.13095	-0.5168	-0.30253	-0.84939	-0.61979	-0.54714	-0.89772	-0.04331	-0.21338	-0.18953	-0.49771	0.032049	0.079306	-0.34328	-0.85498	-0.17311	-0.29656	0.089309	-0.62823	-0.65772	0.049071	0.213644	-0.34724	-0.07954	-0.40359	0.019942	-0.7615	0.356376	0.617966	-0.25144	0.587193	0.19286	-0.05877	-0.1338	-0.04153	1.30159	-0.28308	0.40908	0.692661	0.484803	0.296292	0.127861
-0.37519	-0.6096	-0.77683	-0.29019	-0.52661	-0.35727	-0.05815	-0.76039	-0.17476	-0.46666	-0.28083	-0.903	-0.58103	-0.54394	-0.86972	0.046814	-0.21978	-0.2631	-0.51376	0.070839	0.06542	-0.3186	-0.80707	-0.20799	-0.26196	0.164254	-0.58137	-0.67528	0.084775	0.305868	-0.46708	-0.09922	-0.39882	0.038275	-0.75129	0.370253	0.638783	-0.20733	0.516708	0.126477	-0.02881	-0.11256	0.006073	1.24518	-0.30031	0.404799	0.68734	0.557312	0.25529	0.154224
-0.38732	-0.67058	-0.78351	-0.29999	-0.51684	-0.33499	-0.06233	-0.7489	-0.10848	-0.55052	-0.30872	-0.89455	-0.61995	-0.53364	-0.87925	-0.03815	-0.23289	-0.29125	-0.44717	0.046261	0.082912	-0.33809	-0.73441	-0.22268	-0.29867	0.128004	-0.55325	-0.68104	0.098601	0.320583	-0.48756	-0.11366	-0.37982	-0.06536	-0.75104	0.403577	0.555721	-0.227	0.495743	0.12757	-0.03774	-0.09636	0.097064	1.22225	-0.32288	0.37787	0.6805	0.620365	0.245033	0.085248
-0.39556	-0.66511	-0.78937	-0.32233	-0.50795	-0.37243	-0.07857	-0.67538	-0.11112	-0.49086	-0.40024	-0.89433	-0.68877	-0.53331	-0.92829	0.079584	-0.15548	-0.2955	-0.45084	-0.08868	0.026448	-0.29365	-0.6529	-0.21465	-0.25589	0.154918	-0.52151	-0.67194	0.092478	0.361979	-0.54482	-0.12816	-0.42377	-0.03356	-0.72396	0.218449	0.555237	-0.22071	0.530344	0.093006	0.015737	-0.04321	0.148928	1.21161	-0.33591	0.345286	0.636815	0.635599	0.226686	0.135867
-0.41187	-0.65566	-0.7486	-0.33338	-0.54952	-0.40656	-0.06952	-0.62579	-0.16828	-0.51234	-0.4776	-0.89986	-0.72585	-0.58733	-0.98723	0.137721	-0.17137	-0.31125	-0.55709	-0.09316	-0.01525	-0.23124	-0.65256	-0.17279	-0.31843	0.101011	-0.50512	-0.62599	0.029753	0.316253	-0.49877	-0.13042	-0.47009	-0.03826	-0.7696	0.013845	0.572905	-0.29015	0.681932	0.087565	-5.9e-05	-0.03823	0.181833	1.18189	-0.35551	0.293651	0.575851	0.603479	0.204292	0.101833
-0.42761	-0.61378	-0.7785	-0.36359	-0.59893	-0.44578	-0.0615	-0.68411	-0.24523	-0.46968	-0.52555	-0.98838	-0.78924	-0.61344	-1.01071	0.032726	-0.18897	-0.29718	-0.62379	-0.10328	-0.00768	-0.10813	-0.66226	-0.1249	-0.24797	0.131328	-0.46469	-0.61197	-0.01067	0.319139	-0.47149	-0.15586	-0.51354	0.05323	-0.73848	-0.08024	0.619898	-0.30926	0.623102	0.092835	-0.01578	-0.03818	0.148553	1.17227	-0.36345	0.252507	0.512988	0.553218	0.1504	0.105721
-0.47676	-0.63978	-0.80641	-0.42033	-0.64943	-0.4504	-0.04207	-0.75129	-0.27437	-0.49898	-0.65775	-1.0264	-0.89406	-0.67633	-1.01209	-0.1018	-0.23146	-0.31546	-0.6356	0.073094	0.033556	-0.02347	-0.66343	-0.12107	-0.25607	0.112057	-0.41098	-0.68505	-0.02813	0.251941	-0.4099	-0.15492	-0.55632	-0.0144	-0.71863	-0.00487	0.599113	-0.36199	0.627106	0.116328	0.000601	-0.0592	0.153096	1.20517	-0.36985	0.196652	0.42924	0.50634	0.156088	0.053151
-0.46918	-0.66185	-0.83275	-0.4483	-0.66494	-0.49683	0.03552	-0.79986	-0.2362	-0.48343	-0.6181	-1.01841	-0.94661	-0.67492	-1.00756	-0.13793	-0.22715	-0.32499	-0.56041	0.02238	0.083859	0.053521	-0.59872	-0.16139	-0.24158	0.187245	-0.32853	-0.75041	0.011771	0.226103	-0.36471	-0.17584	-0.51978	-0.07168	-0.6858	0.174069	0.52654	-0.3488	0.617065	0.143216	-0.02731	-0.04863	0.173209	1.22588	-0.36548	0.195228	0.41736	0.462079	0.156536	0.016447
-0.46399	-0.73901	-0.80133	-0.47208	-0.66882	-0.55255	0.030087	-0.76229	-0.17238	-0.52173	-0.58956	-0.94409	-0.95067	-0.70277	-0.98852	-0.1241	-0.23295	-0.34867	-0.52749	0.115928	0.090539	0.039161	-0.55009	-0.2238	-0.33959	0.199169	-0.27475	-0.77715	0.048283	0.162073	-0.43315	-0.18505	-0.45969	-0.12626	-0.70396	0.115404	0.501827	-0.36789	0.650088	0.117122	-0.03425	-0.02982	0.21086	1.16936	-0.369	0.220861	0.318875	0.419119	0.115672	0.05973
-0.44843	-0.7301	-0.83163	-0.48431	-0.64629	-0.55011	0.020916	-0.79493	-0.05399	-0.56101	-0.5824	-0.9238	-0.89231	-0.69816	-0.98494	-0.16562	-0.24802	-0.33498	-0.55096	-0.09565	0.111881	0.076106	-0.50867	-0.2892	-0.40626	0.214844	-0.29848	-0.73005	0.142193	0.234788	-0.46022	-0.20694	-0.39175	-0.12024	-0.68786	0.14717	0.487748	-0.33683	0.668732	0.12104	-0.09895	0.028317	0.252981	1.09567	-0.36342	0.288599	0.300849	0.460756	0.070362	0.073545
-0.48973	-0.65631	-0.84274	-0.52738	-0.63517	-0.53661	-0.00436	-0.81964	0.053618	-0.63932	-0.61735	-0.91086	-0.9484	-0.6919	-0.96902	-0.12114	-0.28111	-0.32134	-0.60595	-0.11114	0.067329	0.056726	-0.5384	-0.32238	-0.45602	0.129524	-0.33629	-0.73047	0.190425	0.188193	-0.44496	-0.18557	-0.34414	-0.14978	-0.66986	0.076955	0.504507	-0.34541	0.508062	0.126268	-0.11331	0.093485	0.239313	1.0705	-0.37514	0.346812	0.233642	0.443445	-0.00601	0.065511
-0.5159	-0.63813	-0.89034	-0.54232	-0.63736	-0.50079	0.091539	-0.90485	0.155004	-0.69528	-0.67628	-0.90294	-0.94382	-0.67552	-0.9842	0.086236	-0.32813	-0.27762	-0.58698	-0.18761	0.046495	0.051985	-0.54617	-0.30104	-0.4563	0.047405	-0.39001	-0.72553	0.247396	0.281279	-0.34669	-0.16403	-0.34765	-0.21423	-0.70244	0.095173	0.474473	-0.31207	0.595505	0.125852	-0.10035	0.163482	0.260458	1.06093	-0.37695	0.389353	0.215487	0.451377	0.00712	-0.01097
-0.55132	-0.61073	-0.91945	-0.57572	-0.67518	-0.5041	0.100461	-0.91914	0.140673	-0.71225	-0.64574	-0.90862	-1.07507	-0.61028	-0.97625	0.100047	-0.33628	-0.27798	-0.56843	-0.05595	0.034022	0.028866	-0.55589	-0.27186	-0.38957	-0.01395	-0.33469	-0.7272	0.315724	0.29936	-0.31484	-0.14147	-0.30807	-0.18787	-0.73577	0.025546	0.480325	-0.33135	0.525489	0.140724	-0.06541	0.198895	0.276311	1.04333	-0.38914	0.386554	0.189034	0.383961	-0.01081	-0.04608
-0.57788	-0.63324	-0.96774	-0.59667	-0.67582	-0.45257	0.123362	-0.9289	0.212512	-0.73734	-0.61909	-0.92914	-1.00794	-0.54956	-0.93763	-0.00902	-0.37198	-0.29675	-0.54049	-0.06908	0.081181	-0.00224	-0.52526	-0.24289	-0.34339	-0.07946	-0.326	-0.70437	0.454649	0.420706	-0.28886	-0.15923	-0.29679	-0.16827	-0.72622	0.069256	0.438351	-0.32407	0.536981	0.136352	-0.05553	0.223328	0.312726	0.977773	-0.37655	0.35543	0.103313	0.287221	-0.05029	-0.08833
-0.62162	-0.63777	-0.98109	-0.66026	-0.70449	-0.41711	0.161288	-0.94858	0.218997	-0.7798	-0.62199	-0.97928	-1.02863	-0.4879	-0.92967	-0.08054	-0.42837	-0.31532	-0.53368	-0.05095	0.080738	-0.01278	-0.54378	-0.23594	-0.35354	-0.11601	-0.30146	-0.74873	0.574183	0.397846	-0.32688	-0.21595	-0.24326	-0.15109	-0.69741	-0.00771	0.38946	-0.34234	0.344646	0.104137	-0.05786	0.205626	0.327067	0.937075	-0.38628	0.323365	0.088396	0.245847	-0.06357	-0.09904
-0.66501	-0.6582	-0.94959	-0.68928	-0.68722	-0.37362	0.190421	-1.04254	0.289098	-0.81684	-0.54059	-1.02311	-0.95027	-0.51289	-0.88868	-0.05748	-0.483	-0.2698	-0.59117	-0.0301	0.057709	-0.08771	-0.55458	-0.20142	-0.387	-0.1252	-0.27207	-0.79426	0.636236	0.297113	-0.35151	-0.23532	-0.26868	-0.15596	-0.65533	0.010623	0.333214	-0.3227	0.228089	0.040177	-0.05602	0.163804	0.294951	0.886318	-0.38682	0.298775	0.025416	0.129737	-0.0481	-0.11771
-0.69419	-0.69398	-0.95924	-0.72944	-0.73572	-0.38082	0.200256	-1.08634	0.30167	-0.79362	-0.60949	-1.07709	-1.02784	-0.5801	-0.96207	0.107103	-0.45812	-0.20067	-0.61997	0.104283	0.006778	-0.10955	-0.60274	-0.17978	-0.40183	-0.1225	-0.22445	-0.79329	0.729728	0.224675	-0.40689	-0.26212	-0.30132	-0.10705	-0.61367	0.040049	0.296389	-0.2992	0.137705	-0.00372	-0.06171	0.121047	0.297788	0.826378	-0.39389	0.293128	-0.01668	0.082749	-0.00828	-0.06268
-0.71675	-0.70149	-0.98463	-0.74724	-0.73112	-0.35678	0.14023	-1.09056	0.335839	-0.7082	-0.59891	-1.12084	-1.0075	-0.64028	-1.00184	0.008736	-0.4483	-0.17407	-0.75992	0.032914	0.07122	-0.14603	-0.58204	-0.18726	-0.39988	-0.13054	-0.20821	-0.76383	0.869171	0.284174	-0.35941	-0.2517	-0.36548	-0.07081	-0.56299	0.06962	0.280811	-0.25078	0.201919	-0.02396	-0.04773	0.111205	0.310732	0.783949	-0.39846	0.287284	-0.12336	0.034386	-0.03574	-0.07077
-0.74409	-0.69295	-1.04532	-0.73552	-0.76138	-0.33667	0.165411	-1.07212	0.418269	-0.65768	-0.60143	-1.16123	-1.08244	-0.62456	-1.06495	-0.02954	-0.4804	-0.18906	-0.81606	0.039549	0.135831	-0.09999	-0.57125	-0.24636	-0.38106	-0.08256	-0.17041	-0.75037	1.00793	0.331285	-0.32833	-0.26555	-0.38539	-0.08453	-0.49884	0.051586	0.22047	-0.20298	0.124087	-0.05116	-0.01139	0.118604	0.323025	0.741852	-0.39826	0.30498	-0.2381	0.068519	-0.07276	-0.11794
-0.74736	-0.61133	-0.9695	-0.76711	-0.73005	-0.28541	0.092857	-1.06527	0.476102	-0.68251	-0.47141	-1.10863	-1.12577	-0.59409	-1.00385	-0.19454	-0.49274	-0.20797	-0.84404	0.128314	0.213429	-0.00775	-0.53139	-0.32469	-0.41232	-0.07439	-0.1061	-0.72158	1.08394	0.330856	-0.26982	-0.28373	-0.36146	-0.13567	-0.48658	-0.05116	0.18674	-0.15486	0.13877	-0.02967	0.054702	0.115993	0.321475	0.75168	-0.37458	0.342382	-0.34461	0.105582	-0.14236	-0.14471
-0.77922	-0.56014	-0.94307	-0.76651	-0.74777	-0.23376	0.067509	-1.05237	0.564002	-0.7176	-0.33904	-1.07251	-1.10332	-0.52021	-0.95446	-0.08917	-0.48868	-0.28894	-0.76284	0.168506	0.172079	0.053796	-0.49584	-0.4319	-0.44344	-0.07592	0.034978	-0.67382	1.17133	0.294876	-0.23109	-0.26908	-0.36513	-0.19226	-0.44732	-0.03354	0.083017	-0.10479	0.093656	0.056788	0.123345	0.09435	0.331708	0.73167	-0.34432	0.333982	-0.47243	0.07753	-0.23497	-0.12954
-0.77883	-0.5658	-0.89824	-0.83143	-0.79879	-0.17384	0.00377	-1.04742	0.55428	-0.73275	-0.28697	-1.0309	-1.13335	-0.52769	-0.90617	0.027612	-0.42237	-0.2887	-0.76275	0.085147	0.13469	0.108782	-0.41907	-0.47871	-0.45182	-0.17135	0.097848	-0.59641	1.26444	0.319629	-0.22631	-0.26944	-0.34989	-0.21623	-0.40387	-0.08293	-0.00104	-0.03885	0.189291	0.130149	0.156148	0.078176	0.33237	0.782386	-0.32951	0.309904	-0.49129	0.039978	-0.29378	-0.06824
-0.82252	-0.59663	-0.87402	-0.84447	-0.84785	-0.06316	0.057223	-1.07826	0.561532	-0.75664	-0.28195	-1.00049	-1.04947	-0.49568	-0.86517	0.167017	-0.38046	-0.25613	-0.72133	-0.06199	0.083426	0.112972	-0.29021	-0.55425	-0.48898	-0.17507	0.12774	-0.60243	1.32558	0.31507	-0.23908	-0.28851	-0.33424	-0.27726	-0.36435	-0.14315	-0.12245	0.034597	0.17179	0.113476	0.185276	0.04291	0.301249	0.815343	-0.31191	0.273602	-0.53771	-0.00773	-0.29421	-0.09168
-0.81536	-0.6053	-0.83509	-0.85516	-0.87912	-0.07723	0.027621	-1.12537	0.462769	-0.72839	-0.36279	-0.97867	-1.14455	-0.53545	-0.81049	0.243372	-0.30585	-0.15579	-0.77071	0.104839	0.026986	0.192033	-0.18097	-0.5805	-0.47693	-0.18335	0.12884	-0.60053	1.35	0.285578	-0.2125	-0.29463	-0.25759	-0.29394	-0.2224	-0.18465	-0.17909	0.066472	0.178279	0.065745	0.247104	0.006608	0.201797	0.877127	-0.27924	0.248235	-0.53046	-0.0037	-0.30319	-0.04785
-0.83231	-0.57843	-0.80011	-0.89001	-0.86439	-0.07329	0.02474	-1.15802	0.419862	-0.68918	-0.3559	-0.95266	-1.12965	-0.52248	-0.77612	0.11369	-0.24879	-0.10463	-0.69686	0.205924	0.006741	0.343115	-0.15405	-0.66612	-0.57466	-0.12946	0.119473	-0.64341	1.41075	0.243177	-0.14069	-0.30386	-0.17655	-0.37639	-0.06916	-0.2349	-0.26888	0.085626	0.178993	-0.0179	0.282025	-0.08446	0.143658	0.875626	-0.21654	0.218274	-0.61237	0.006136	-0.34604	-0.03304
-0.85431	-0.58869	-0.78487	-0.95117	-0.85569	-0.10949	0.048413	-1.11045	0.340549	-0.59254	-0.32647	-0.92992	-1.15213	-0.5136	-0.76929	0.031826	-0.18121	-0.12732	-0.7267	0.211933	-0.01009	0.569717	-0.14538	-0.67442	-0.59315	-0.02449	0.151586	-0.67018	1.56388	0.158349	-0.04431	-0.28599	-0.12261	-0.44253	0.139987	-0.30993	-0.33539	0.0781	0.184328	-0.02973	0.3423	-0.15014	0.076613	0.884978	-0.15721	0.19798	-0.68088	-0.02691	-0.37177	0.077391
-0.88915	-0.59417	-0.81283	-1.02664	-0.89694	-0.12589	0.123489	-1.11318	0.220967	-0.50418	-0.31424	-0.91873	-1.20585	-0.51775	-0.76743	0.013031	-0.16229	-0.11428	-0.75253	0.14799	-0.00974	0.738422	-0.12842	-0.60478	-0.62995	0.118129	0.164308	-0.7047	1.69346	0.107184	0.005264	-0.30513	-0.11547	-0.48774	0.232659	-0.28787	-0.36348	0.07837	0.173492	-0.05064	0.407784	-0.23764	0.091651	0.902768	-0.14408	0.189459	-0.73657	-0.07272	-0.37789	0.107388
-0.91669	-0.56592	-0.80552	-1.00901	-0.87136	-0.1822	0.181848	-1.14284	0.140344	-0.40899	-0.40352	-0.92273	-1.1305	-0.4806	-0.76164	0.018211	-0.15298	-0.08164	-0.80363	0.26104	-0.04051	0.781964	-0.05467	-0.47585	-0.56135	0.155634	0.151767	-0.68783	1.80995	0.040967	0.10337	-0.31007	-0.12504	-0.5651	0.227721	-0.27447	-0.37954	0.060501	0.208076	-0.04529	0.438884	-0.29862	0.023417	0.904395	-0.15634	0.184245	-0.76831	-0.08458	-0.37557	0.092572
-0.90766	-0.53361	-0.83108	-0.98489	-0.92231	-0.27664	0.1987	-1.22792	0.05277	-0.30507	-0.5442	-0.94672	-1.17823	-0.50225	-0.73637	0.082683	-0.15704	-0.01981	-0.85251	0.407707	-0.1035	0.7453	-0.05546	-0.35798	-0.48122	0.162658	0.128399	-0.68233	1.87207	0.031881	0.104016	-0.31144	-0.13612	-0.58218	0.181685	-0.32967	-0.37949	0.046769	0.100544	-0.09741	0.483012	-0.37484	-0.04032	0.915944	-0.18564	0.156392	-0.79857	-0.126	-0.37796	0.022992
-0.92999	-0.4815	-0.82796	-0.95881	-0.93453	-0.31411	0.219309	-1.30617	0.06018	-0.30569	-0.61116	-0.96325	-1.24535	-0.47168	-0.68881	0.051438	-0.11028	-0.0018	-0.85145	0.528656	-0.11955	0.739032	-0.05812	-0.31229	-0.44404	0.109986	0.118161	-0.66914	1.96056	-0.07978	0.152654	-0.31665	-0.15986	-0.64165	0.090132	-0.4076	-0.39575	0.037996	0.051112	-0.1654	0.403031	-0.45101	-0.14251	0.871871	-0.19694	0.129076	-0.89174	-0.1736	-0.3781	-0.00793
-0.95451	-0.46765	-0.89241	-1.02508	-1.00708	-0.3172	0.208184	-1.30192	0.075492	-0.30799	-0.57661	-1.01203	-1.31684	-0.48385	-0.50748	0.104755	-0.05554	-0.04069	-0.7951	0.576055	-0.11706	0.811622	-0.11783	-0.29207	-0.44377	0.114537	0.20529	-0.67429	2.02122	-0.05551	0.103096	-0.33699	-0.19907	-0.61003	-0.00299	-0.41971	-0.32649	0.054875	-0.03214	-0.19247	0.337442	-0.51559	-0.16821	0.82598	-0.19725	0.10819	-0.93859	-0.25043	-0.37814	0.051708
-0.98757	-0.42581	-0.9708	-1.0357	-1.02477	-0.31966	0.249336	-1.3608	0.051249	-0.32501	-0.64233	-1.0895	-1.44974	-0.43109	-0.38143	-0.03289	0.000527	0.018611	-0.71612	0.663442	-0.06433	0.836331	-0.13123	-0.35145	-0.43661	0.082231	0.267698	-0.69706	2.04374	-0.1145	0.174025	-0.38132	-0.25019	-0.64844	-0.03769	-0.41547	-0.27638	0.105328	0.019291	-0.26406	0.233166	-0.58395	-0.19831	0.781373	-0.2021	0.100711	-0.97044	-0.26036	-0.34071	0.078252
-1.00215	-0.41154	-1.03412	-1.10797	-1.05785	-0.32409	0.315708	-1.29555	0.047457	-0.26322	-0.66347	-1.16564	-1.43641	-0.38523	-0.22002	-0.18208	0.107734	0.030971	-0.69865	0.720002	-0.01087	0.846132	-0.15308	-0.36901	-0.4167	0.060746	0.316022	-0.74424	2.02401	-0.00816	0.152432	-0.42019	-0.291	-0.69694	-0.06325	-0.43051	-0.22663	0.163336	0.083471	-0.27837	0.16681	-0.65382	-0.26907	0.746045	-0.20962	0.079523	-0.91077	-0.29957	-0.32912	0.024156
-1.02006	-0.40304	-1.04535	-1.08138	-1.07403	-0.28137	0.334889	-1.29497	0.071024	-0.1912	-0.79021	-1.18557	-1.46248	-0.32691	-0.16253	-0.39409	0.298247	0.084017	-0.69206	0.608947	0.071541	0.834782	-0.10603	-0.45246	-0.39603	0.000735	0.333988	-0.76821	1.99928	0.018199	0.202926	-0.43187	-0.31603	-0.78814	-0.03644	-0.52898	-0.20552	0.214278	0.160061	-0.24391	0.021808	-0.70032	-0.33478	0.733991	-0.22639	0.031363	-0.91996	-0.29356	-0.35891	-0.08489
-1.02558	-0.44294	-1.0011	-1.09726	-1.06735	-0.21193	0.317845	-1.16404	0.104804	-0.16839	-0.78401	-1.15723	-1.35497	-0.3143	-0.09638	-0.42269	0.58035	0.023557	-0.67865	0.277636	0.16857	0.879827	-0.07081	-0.51035	-0.37405	-0.07146	0.383012	-0.70329	1.97065	0.199139	0.17881	-0.44713	-0.33046	-0.86432	0.004063	-0.51293	-0.19906	0.237044	0.319712	-0.1296	-0.16508	-0.73494	-0.36939	0.674462	-0.25023	-0.03138	-0.87278	-0.26029	-0.49882	-0.21537
-1.03034	-0.47453	-0.90208	-1.07859	-1.0128	-0.13488	0.23306	-1.14422	0.196683	-0.16074	-0.8086	-1.13063	-1.21622	-0.26912	-0.07814	-0.4312	0.826302	-0.02637	-0.61625	0.125886	0.245257	1.00174	-0.05713	-0.61907	-0.37241	-0.04299	0.458002	-0.66189	1.98678	0.260513	0.156768	-0.45485	-0.32717	-0.91286	0.065997	-0.53111	-0.17458	0.286675	0.428231	-0.05848	-0.30966	-0.74035	-0.36487	0.632415	-0.22762	-0.08106	-0.87026	-0.27853	-0.59104	-0.24079
-1.03198	-0.49862	-0.79679	-1.15151	-0.99891	-0.19069	0.235588	-1.0404	0.140226	-0.16992	-0.9125	-1.11245	-1.23068	-0.23392	-0.07929	-0.10897	1.05504	-0.05166	-0.61273	0.227579	0.252503	1.16451	-0.10516	-0.62928	-0.33909	0.034033	0.567351	-0.65201	1.97144	0.264955	0.084904	-0.48979	-0.30313	-0.8921	0.137262	-0.57657	-0.16281	0.337434	0.421016	-0.05706	-0.41964	-0.76025	-0.40149	0.56493	-0.19907	-0.11897	-0.89816	-0.34216	-0.67755	-0.21894
-1.02449	-0.47468	-0.75145	-1.25588	-0.98486	-0.2419	0.187939	-0.99778	0.178721	-0.13248	-0.90839	-1.15205	-1.32137	-0.10486	-0.04345	0.054367	1.23996	-0.08331	-0.60702	0.492577	0.289449	1.40336	-0.10542	-0.69021	-0.36735	0.150815	0.687564	-0.66154	1.95245	0.229897	0.016216	-0.48474	-0.29674	-0.87065	0.191274	-0.65231	-0.12206	0.345213	0.38936	-0.1368	-0.54559	-0.77427	-0.45534	0.538107	-0.18059	-0.14185	-0.95019	-0.47182	-0.75103	-0.15917
-1.00913	-0.47552	-0.71603	-1.33619	-0.9528	-0.22326	0.113274	-0.84876	0.089179	-0.12727	-0.96286	-1.14768	-1.31651	0.021002	0.008568	0.150887	1.47018	-0.07865	-0.57069	0.45358	0.339051	1.60096	-0.11579	-0.74565	-0.37973	0.17165	0.835584	-0.64485	1.87289	0.299396	-0.08508	-0.51742	-0.29148	-0.9087	0.223881	-0.72598	-0.13959	0.341242	0.430582	-0.13957	-0.73701	-0.80607	-0.47758	0.533086	-0.17872	-0.17265	-1.04015	-0.49858	-0.85247	-0.14477
-0.98426	-0.46467	-0.67674	-1.33477	-0.91191	-0.12803	0.026167	-0.76346	0.100366	-0.13394	-0.96996	-1.1071	-1.27896	0.162306	0.073878	0.188689	1.59888	-0.10723	-0.49469	0.369667	0.391525	1.75594	-0.10622	-0.80103	-0.4785	0.183396	0.921468	-0.59667	1.86283	0.405383	-0.16201	-0.49649	-0.26146	-0.97753	0.230897	-0.71636	-0.14326	0.294518	0.587491	-0.14757	-0.91282	-0.79572	-0.52248	0.495735	-0.18489	-0.16616	-0.97909	-0.54259	-0.93598	-0.13517
-0.99986	-0.42771	-0.6011	-1.31819	-0.89383	-0.07178	-0.04799	-0.68377	0.065543	-0.11885	-1.04905	-1.06673	-1.0706	0.226675	0.090522	0.378104	1.75877	-0.13818	-0.45647	0.161586	0.37978	1.85962	-0.16001	-0.77106	-0.49557	0.2162	0.993457	-0.58502	1.83179	0.488995	-0.23202	-0.52005	-0.20583	-1.01708	0.196573	-0.78422	-0.15035	0.293834	0.727922	-0.1371	-1.02927	-0.81493	-0.52995	0.442721	-0.16466	-0.20882	-0.97393	-0.55119	-0.98916	-0.04588
-1.00369	-0.37773	-0.58231	-1.27467	-0.90393	-0.06918	-0.05045	-0.60959	0.134157	-0.05556	-1.05047	-1.03593	-0.98857	0.284831	0.094861	0.743299	1.90775	-0.10494	-0.42796	0.128482	0.331412	1.94014	-0.14317	-0.75818	-0.56325	0.231255	1.0263	-0.56658	1.77527	0.45274	-0.33012	-0.47118	-0.18647	-1.02802	0.209152	-0.86446	-0.11163	0.253689	0.704906	-0.13311	-1.12138	-0.8336	-0.58599	0.359398	-0.1721	-0.23573	-0.90042	-0.58638	-1.02111	-0.01627
-1.00906	-0.29705	-0.57109	-1.33851	-0.90896	-0.09514	-0.01167	-0.50566	0.251851	0.044168	-0.93157	-1.02954	-0.92952	0.346574	0.134636	1.24118	2.10207	-0.01965	-0.44043	0.108247	0.226235	2.0326	-0.09958	-0.74984	-0.53982	0.265964	1.07608	-0.5932	1.63774	0.428954	-0.4374	-0.38615	-0.21413	-1.03687	0.229147	-0.91194	-0.13269	0.258039	0.700546	-0.12728	-1.15074	-0.86056	-0.53754	0.35179	-0.16838	-0.25632	-0.92976	-0.60909	-1.056	0.039124
-0.9821	-0.19127	-0.56805	-1.36273	-0.89989	-0.05725	0.110191	-0.40102	0.425493	0.096379	-0.83832	-0.99643	-0.87479	0.393808	0.178988	1.60174	2.13292	0.0335	-0.41248	0.242432	0.16574	2.09323	-0.02432	-0.76301	-0.6054	0.235784	1.10322	-0.57629	1.47783	0.429992	-0.56584	-0.29532	-0.26311	-1.07356	0.266015	-0.78685	-0.15478	0.244106	0.554222	-0.04937	-1.16646	-0.87874	-0.51124	0.316792	-0.17629	-0.24553	-0.94991	-0.68129	-1.08336	0.037949
-0.95556	-0.08018	-0.51503	-1.42184	-0.86306	-0.03013	0.216653	-0.30416	0.585651	0.069969	-0.73085	-0.94781	-0.81943	0.433915	0.236389	1.84586	2.12292	0.000194	-0.33269	0.365613	0.092387	2.11266	0.015502	-0.80252	-0.61301	0.221681	1.13072	-0.49946	1.38981	0.449284	-0.62646	-0.20247	-0.24259	-1.14665	0.21922	-0.70932	-0.18514	0.23437	0.433108	-0.03681	-1.20979	-0.88202	-0.50561	0.242147	-0.17561	-0.23033	-1.05141	-0.73473	-1.14576	0.056648
-0.91164	0.011916	-0.43351	-1.28677	-0.79017	0.035865	0.435638	-0.29881	0.70425	0.044631	-0.67515	-0.83843	-0.78984	0.533195	0.307979	1.94274	2.13418	-0.11937	-0.21142	0.31795	0.088049	2.04834	0.131247	-0.85633	-0.6562	0.222037	1.15432	-0.39807	1.33133	0.465881	-0.68796	-0.1572	-0.21892	-1.20804	0.229447	-0.7175	-0.26014	0.19051	0.325186	0.004253	-1.27101	-0.93475	-0.49633	0.159605	-0.19042	-0.26582	-1.08392	-0.78737	-1.19071	0.022021
-0.83993	0.100167	-0.35201	-1.14075	-0.66697	0.066639	0.66098	-0.23414	0.694787	0.061234	-0.56721	-0.69937	-0.79941	0.63419	0.381127	2.11037	2.18839	-0.13393	-0.14076	0.276661	0.01527	1.98483	0.25124	-0.86506	-0.63344	0.245919	1.1395	-0.26928	1.24507	0.47217	-0.66233	-0.08551	-0.23201	-1.20641	0.209604	-0.76213	-0.35709	0.155472	0.278126	-0.00984	-1.27632	-0.95472	-0.51799	0.094472	-0.21111	-0.28127	-1.11679	-0.8083	-1.28145	0.016884
-0.7583	0.182585	-0.2351	-0.96306	-0.56778	0.107096	0.951502	-0.20645	0.648447	0.202327	-0.52792	-0.57223	-0.89909	0.736554	0.398449	2.12731	2.21272	-0.16411	-0.11127	0.225092	0.019242	1.97472	0.394116	-0.83177	-0.62624	0.301081	1.08555	-0.20084	1.10436	0.491251	-0.65754	-0.08811	-0.2643	-1.13863	0.214274	-0.71869	-0.4548	0.124344	0.169526	-0.03184	-1.25821	-0.99786	-0.50955	0.089252	-0.23732	-0.31206	-1.08317	-0.79377	-1.35966	0.023752
-0.6643	0.292297	-0.12182	-0.88251	-0.51696	0.151083	1.23077	-0.09909	0.564475	0.315452	-0.52725	-0.45341	-0.77759	0.800667	0.358065	2.19813	2.1905	-0.16689	-0.12621	0.335646	-0.03288	1.95356	0.442029	-0.74891	-0.61565	0.311976	0.969087	-0.15926	0.970291	0.450902	-0.59001	-0.08405	-0.30313	-1.11188	0.160305	-0.60946	-0.52811	0.089667	0.076565	-0.06547	-1.23223	-1.05881	-0.53873	0.043469	-0.28358	-0.3449	-1.16027	-0.78097	-1.43433	0.079278
-0.57778	0.322046	-0.02562	-0.75529	-0.5071	0.193155	1.47676	-0.0798	0.529304	0.312414	-0.49786	-0.39423	-0.66007	0.873592	0.374403	2.36854	2.17046	-0.19439	-0.10376	0.368821	-0.11212	1.93376	0.513854	-0.70453	-0.69487	0.319908	0.860752	-0.09309	0.882919	0.378089	-0.67414	-0.07008	-0.32535	-1.09767	0.067245	-0.64612	-0.6333	0.052841	-0.06844	-0.09949	-1.26882	-1.12794	-0.55629	0.030165	-0.30954	-0.38382	-1.18116	-0.75284	-1.497	0.109226
-0.46904	0.490279	0.06718	-0.62355	-0.48768	0.26451	1.74115	-0.04695	0.524527	0.287457	-0.35418	-0.26975	-0.51557	0.974405	0.385087	2.67696	2.10985	-0.1612	-0.06115	0.363217	-0.27427	1.84757	0.551431	-0.66988	-0.74259	0.338231	0.747014	-0.02014	0.812342	0.158317	-0.67485	-0.00529	-0.34135	-1.09511	0.019877	-0.69251	-0.72284	0.011776	-0.25397	-0.17624	-1.26616	-1.19249	-0.54343	0.053931	-0.34597	-0.41133	-1.18241	-0.76862	-1.5097	0.17486
-0.3686	0.703848	0.12925	-0.51436	-0.41947	0.349618	1.91047	-0.01128	0.513292	0.268561	-0.09298	-0.16558	-0.47864	1.04254	0.391349	2.80265	2.02715	-0.13224	-0.058	0.368672	-0.36017	1.75545	0.588874	-0.66675	-0.8155	0.336107	0.65545	0.085327	0.715476	0.016991	-0.72042	0.045442	-0.3593	-1.03964	-0.05165	-0.73526	-0.78048	0.002451	-0.58754	-0.24141	-1.19671	-1.19747	-0.51885	0.078673	-0.34137	-0.41343	-1.15085	-0.7394	-1.56439	0.205175
-0.30273	0.950081	0.189085	-0.48493	-0.30057	0.477824	2.04816	-0.01631	0.533676	0.304501	0.134029	-0.04757	-0.48849	1.12728	0.321499	2.73292	1.92618	-0.15283	-0.0461	0.300846	-0.37037	1.65404	0.527979	-0.7274	-0.83723	0.285979	0.618133	0.123098	0.681617	-0.12028	-0.57733	0.051294	-0.34285	-1.06264	-0.08268	-0.57742	-0.79981	-0.03818	-0.80497	-0.25371	-1.20389	-1.23497	-0.51775	0.068137	-0.36855	-0.44404	-1.10212	-0.68191	-1.56913	0.162218
-0.25779	1.10551	0.204761	-0.49516	-0.16577	0.610074	2.10154	-0.02553	0.503566	0.301076	0.371774	-0.02723	-0.33269	1.21459	0.317111	2.52154	1.83539	-0.20725	0.018353	0.235516	-0.30884	1.60433	0.509982	-0.72387	-0.85629	0.326564	0.593181	0.157467	0.6463	0.048203	-0.59018	-0.05692	-0.30955	-1.0565	-0.16596	-0.51385	-0.79214	-0.06334	-0.75941	-0.20804	-1.13314	-1.25838	-0.48458	0.084217	-0.34409	-0.45524	-1.12451	-0.64357	-1.60105	0.19196
-0.24738	1.19086	0.201971	-0.50002	-0.02842	0.713365	2.07097	0.018208	0.446464	0.295751	0.563141	-0.0923	-0.12156	1.25989	0.327138	2.0942	1.78413	-0.2273	0.143178	0.101687	-0.18279	1.59117	0.43357	-0.77507	-0.78627	0.351385	0.617191	0.129723	0.634014	0.149679	-0.51018	-0.19312	-0.29599	-1.02153	-0.15896	-0.31144	-0.77069	-0.04786	-0.76471	-0.19667	-1.16096	-1.29995	-0.5045	0.10756	-0.3366	-0.48384	-1.10114	-0.68755	-1.57426	0.187356
-0.20526	1.30647	0.238292	-0.49937	0.050266	0.73385	2.06504	0.103048	0.409374	0.383808	0.73583	-0.07543	0.146533	1.35848	0.315195	1.52684	1.73888	-0.18583	0.323134	0.179873	-0.03568	1.5286	0.42895	-0.7399	-0.73297	0.425449	0.614171	0.084351	0.658908	0.236487	-0.47868	-0.30815	-0.31081	-0.94953	-0.17225	-0.15498	-0.77358	-0.02365	-0.67158	-0.19482	-1.06861	-1.30559	-0.46129	0.192328	-0.32062	-0.49992	-1.08541	-0.70703	-1.553	0.229105
-0.171	1.39783	0.302985	-0.43112	0.134482	0.731827	2.16304	0.175441	0.351133	0.473103	0.757389	-0.0389	0.213729	1.3845	0.305447	1.07577	1.71297	-0.15213	0.420204	0.226354	0.119651	1.45311	0.401361	-0.78738	-0.72929	0.397186	0.612515	0.074005	0.625884	0.293986	-0.335	-0.37584	-0.33757	-0.89088	-0.12353	0.102253	-0.75461	-0.00248	-0.71492	-0.21976	-1.08653	-1.32997	-0.49329	0.179893	-0.32059	-0.54687	-1.07734	-0.69851	-1.54184	0.151827
-0.10499	1.44908	0.33169	-0.34198	0.214453	0.704531	2.32736	0.174537	0.323298	0.541467	0.789021	0.033096	0.220434	1.44559	0.239262	0.774713	1.62572	-0.14816	0.582829	0.336688	0.198555	1.43342	0.368891	-0.79924	-0.73241	0.394689	0.604199	0.076535	0.613549	0.250328	-0.31311	-0.48012	-0.33309	-0.90854	-0.13647	0.134812	-0.77784	-0.03147	-0.60524	-0.28993	-1.09737	-1.36456	-0.52012	0.190902	-0.32535	-0.5798	-1.03404	-0.72011	-1.53374	0.091554
-0.07389	1.47981	0.317482	-0.22079	0.259307	0.721013	2.41152	0.135484	0.293711	0.568435	0.83903	0.01908	0.348159	1.44806	0.255556	0.596709	1.57333	-0.11491	0.70966	0.32759	0.286209	1.44728	0.350118	-0.777	-0.70381	0.393693	0.584508	0.082916	0.549618	0.289308	-0.32131	-0.55947	-0.32604	-0.9158	-0.13	0.178608	-0.72607	-0.05046	-0.58529	-0.36463	-1.118	-1.38193	-0.53364	0.144038	-0.31213	-0.59095	-1.03847	-0.73571	-1.51692	0.058507
-0.04123	1.52019	0.334454	-0.13953	0.271348	0.726797	2.41618	0.126206	0.304368	0.577761	1.01525	0.015758	0.440647	1.42266	0.209669	0.522932	1.53701	-0.08333	0.781105	0.390177	0.294222	1.40127	0.246751	-0.72564	-0.67599	0.394483	0.53286	0.128836	0.52933	0.198052	-0.37342	-0.58992	-0.36666	-0.90915	-0.12333	0.105839	-0.73431	-0.07817	-0.60246	-0.4296	-1.1287	-1.38074	-0.56344	0.10711	-0.34678	-0.60001	-1.00553	-0.77102	-1.52037	0.061678
-0.02998	1.60238	0.397294	-0.04051	0.251573	0.744066	2.39601	0.07356	0.332737	0.563614	1.08736	0.016115	0.560988	1.36476	0.218479	0.454787	1.51202	-0.06544	0.739605	0.339702	0.294234	1.33381	0.155464	-0.61126	-0.64948	0.369253	0.464262	0.172434	0.465129	0.147579	-0.38449	-0.56741	-0.41251	-0.90717	-0.13212	0.153551	-0.68317	-0.10501	-0.72238	-0.46544	-1.06217	-1.35045	-0.56406	0.033589	-0.37769	-0.57884	-1.00306	-0.7819	-1.50479	0.036884
0.005899	1.67814	0.459114	0.026159	0.257147	0.774274	2.39194	0.060447	0.274953	0.494653	1.05549	0.022328	0.459068	1.27085	0.23057	0.515962	1.45901	-0.10128	0.661759	0.337451	0.266733	1.30272	0.07457	-0.56053	-0.64076	0.355978	0.377405	0.195221	0.427885	0.048149	-0.49524	-0.53759	-0.42932	-0.97492	-0.20395	0.114382	-0.66055	-0.10919	-0.87638	-0.45835	-1.00954	-1.35071	-0.57604	-0.02761	-0.42092	-0.60285	-0.92888	-0.83725	-1.47957	-0.01248
0.046383	1.65083	0.49538	0.115876	0.261469	0.741311	2.32949	0.028143	0.282906	0.423183	0.910132	0.061854	0.436776	1.23251	0.216231	0.480757	1.39641	-0.09469	0.617112	0.505142	0.256308	1.2538	0.057848	-0.46767	-0.60928	0.321835	0.247984	0.158385	0.439333	0.111344	-0.55179	-0.50855	-0.39929	-1.05233	-0.22548	0.019453	-0.69716	-0.13164	-0.92262	-0.44495	-0.95012	-1.31445	-0.55324	-0.07334	-0.43743	-0.60776	-0.87443	-0.84738	-1.46438	-0.08267
0.088166	1.57196	0.542393	0.187858	0.255816	0.723724	2.25468	0.07293	0.20814	0.461828	0.722144	0.159563	0.345565	1.16299	0.162996	0.475135	1.37532	-0.05386	0.546425	0.575924	0.249643	1.13792	0.063162	-0.4366	-0.6567	0.382683	0.097332	0.196918	0.472819	0.242833	-0.65605	-0.50475	-0.35546	-1.13394	-0.24619	0.029687	-0.74635	-0.10639	-0.86997	-0.43724	-0.88723	-1.30454	-0.57506	-0.09558	-0.44064	-0.62534	-0.83146	-0.79226	-1.48379	-0.14062
0.107477	1.5192	0.579585	0.207282	0.266828	0.646579	2.16871	0.15922	0.250985	0.463753	0.621621	0.232145	0.351792	1.11023	0.137468	0.429564	1.34725	-0.06398	0.519893	0.709412	0.242121	1.01124	0.050189	-0.4064	-0.63944	0.434533	0.012921	0.282026	0.490675	0.335315	-0.59284	-0.50272	-0.30617	-1.04511	-0.25191	-0.04279	-0.78563	-0.06951	-0.7809	-0.43213	-0.83157	-1.28169	-0.58959	-0.11928	-0.43798	-0.61948	-0.83484	-0.73972	-1.53542	-0.17089
0.123191	1.51799	0.601782	0.210394	0.278224	0.669534	2.1073	0.288607	0.204974	0.51956	0.566042	0.306328	0.29878	1.03678	0.123938	0.511947	1.26496	-0.11017	0.453588	0.524096	0.23194	0.913957	0.017487	-0.40284	-0.60027	0.454193	-0.00439	0.335864	0.470954	0.239647	-0.57729	-0.49016	-0.27771	-1.02579	-0.26907	-0.02173	-0.77898	-0.02953	-0.64827	-0.42847	-0.7688	-1.28416	-0.57519	-0.13947	-0.43404	-0.61628	-0.84817	-0.70085	-1.53751	-0.19818
0.153483	1.52465	0.560701	0.185235	0.332531	0.723173	2.03624	0.358919	0.282859	0.502583	0.649229	0.303394	0.342322	1.03399	0.165021	0.442637	1.16409	-0.13477	0.530621	0.457805	0.275664	0.853668	0.005447	-0.33552	-0.59431	0.465346	-0.04449	0.335088	0.462323	0.14462	-0.52376	-0.49652	-0.26338	-0.98138	-0.26475	-0.02481	-0.76987	-0.0232	-0.59849	-0.43255	-0.69085	-1.27388	-0.49932	-0.14943	-0.44426	-0.6339	-0.83177	-0.72337	-1.54175	-0.16719
0.201891	1.53547	0.538212	0.255609	0.408676	0.892869	1.99057	0.4209	0.35964	0.485572	0.722411	0.371335	0.335938	1.01381	0.183519	0.560883	1.0678	-0.07854	0.518494	0.315573	0.271608	0.797972	0.030003	-0.26833	-0.59509	0.456045	-0.06674	0.308126	0.448547	0.038414	-0.5435	-0.53663	-0.27547	-1.00602	-0.24139	0.005851	-0.75713	-0.04747	-0.45481	-0.47551	-0.65374	-1.25201	-0.51028	-0.14691	-0.4586	-0.62085	-0.78468	-0.72045	-1.49411	-0.15104
0.273751	1.59688	0.471891	0.30309	0.470971	1.08038	1.93264	0.457858	0.479733	0.489632	0.744362	0.39264	0.344828	0.976545	0.251914	0.543299	0.98319	-0.05939	0.552943	0.217313	0.269552	0.743511	0.087085	-0.20192	-0.64592	0.48552	-0.1464	0.345947	0.443242	-0.04499	-0.52568	-0.56868	-0.30202	-1.02343	-0.30228	0.046745	-0.74206	-0.04804	-0.56579	-0.49289	-0.60648	-1.24222	-0.50576	-0.10867	-0.47956	-0.63988	-0.71432	-0.74453	-1.49152	-0.19613
0.328232	1.67599	0.435931	0.360132	0.537757	1.20743	1.90299	0.481198	0.503336	0.491514	0.748992	0.455508	0.34032	0.909062	0.251103	0.674364	0.915711	-0.09793	0.484098	0.140343	0.249091	0.665842	0.153382	-0.13096	-0.59296	0.500631	-0.1779	0.382876	0.481235	-0.01081	-0.52675	-0.58602	-0.3616	-0.9685	-0.33128	0.087028	-0.74325	-0.05746	-0.53248	-0.48736	-0.5546	-1.23707	-0.48922	-0.12182	-0.49661	-0.63198	-0.67525	-0.68481	-1.46423	-0.24873
0.379148	1.68408	0.415861	0.389469	0.599068	1.25659	1.87557	0.51567	0.499946	0.563727	0.733506	0.515082	0.349264	0.86433	0.242758	0.60818	0.881631	-0.1343	0.525967	0.257065	0.240065	0.577674	0.162546	-0.04226	-0.5904	0.506759	-0.27631	0.408281	0.43425	0.027557	-0.52331	-0.59003	-0.39383	-0.9569	-0.34281	0.150885	-0.80837	-0.05861	-0.59391	-0.48734	-0.49822	-1.25978	-0.47628	-0.10389	-0.53052	-0.65107	-0.67235	-0.69785	-1.4286	-0.2881
0.401994	1.6173	0.398133	0.412434	0.685848	1.29621	1.81919	0.514643	0.490204	0.548137	0.697326	0.557932	0.352005	0.833291	0.184368	0.514924	0.86643	-0.08287	0.563507	0.225389	0.278851	0.567736	0.13956	0.016574	-0.57434	0.508613	-0.28978	0.422203	0.395951	0.140025	-0.56665	-0.59644	-0.36652	-0.9305	-0.3744	0.100663	-0.83042	-0.08115	-0.43332	-0.46522	-0.46079	-1.26103	-0.47113	-0.16181	-0.54263	-0.64241	-0.68057	-0.66183	-1.39964	-0.2625
0.420743	1.56581	0.380813	0.427144	0.760019	1.33303	1.80345	0.548696	0.555159	0.523015	0.626588	0.609759	0.296447	0.824478	0.162173	0.353241	0.805599	-0.02107	0.592852	0.342481	0.272721	0.58466	0.086962	0.019796	-0.60463	0.453302	-0.29746	0.422147	0.337182	0.119732	-0.60024	-0.58917	-0.33858	-0.98177	-0.44886	0.069765	-0.85769	-0.12063	-0.38865	-0.45703	-0.44044	-1.26236	-0.51043	-0.20535	-0.55128	-0.66086	-0.7086	-0.74217	-1.37737	-0.28689
0.442187	1.56633	0.369001	0.396525	0.799326	1.37882	1.76411	0.562965	0.648762	0.548335	0.582277	0.629538	0.286596	0.865759	0.162033	0.278525	0.762642	0.03532	0.586423	0.164305	0.283752	0.568932	0.045631	0.0143	-0.56611	0.420555	-0.25674	0.439818	0.353165	0.095965	-0.56348	-0.58412	-0.34578	-0.92005	-0.50917	0.063784	-0.823	-0.16391	-0.41531	-0.40722	-0.41435	-1.23716	-0.44368	-0.24004	-0.55121	-0.6665	-0.71893	-0.73334	-1.41515	-0.29315
0.473636	1.54903	0.323087	0.372532	0.847744	1.39542	1.73437	0.633689	0.729328	0.586627	0.587461	0.645259	0.249217	0.824492	0.223705	0.350877	0.73191	-0.00519	0.56131	0.243269	0.233623	0.486046	0.041166	-0.01575	-0.51362	0.387174	-0.26247	0.395945	0.33772	0.018782	-0.59415	-0.59749	-0.38183	-0.8516	-0.50425	0.195257	-0.82292	-0.19604	-0.55434	-0.42918	-0.40803	-1.22068	-0.44533	-0.27582	-0.56272	-0.66937	-0.72003	-0.75927	-1.3726	-0.31862
0.5237	1.57452	0.309849	0.382301	0.867638	1.44024	1.68443	0.682182	0.819141	0.661982	0.626545	0.612454	0.214656	0.789395	0.319903	0.467063	0.709969	-0.01855	0.613542	0.222848	0.207378	0.435685	0.023134	-0.02394	-0.42837	0.353441	-0.28976	0.347243	0.291318	-0.04843	-0.59189	-0.61278	-0.3896	-0.74869	-0.46726	0.245484	-0.78989	-0.20726	-0.61361	-0.48894	-0.46098	-1.20976	-0.41869	-0.26688	-0.57878	-0.64552	-0.73924	-0.72338	-1.32925	-0.37974
0.563972	1.57567	0.291497	0.464628	0.954061	1.51066	1.67002	0.706479	0.891548	0.642574	0.677771	0.613081	0.188831	0.657307	0.362975	0.556852	0.730726	-0.04514	0.628889	0.314676	0.182004	0.42321	-0.0211	-0.02737	-0.42867	0.281126	-0.33675	0.307699	0.229834	-0.03382	-0.61769	-0.57734	-0.38853	-0.73376	-0.42493	0.211445	-0.76475	-0.20916	-0.68814	-0.55015	-0.5269	-1.20348	-0.42408	-0.30714	-0.5788	-0.63155	-0.76731	-0.73284	-1.27675	-0.46656
0.592872	1.65836	0.319204	0.584203	1.00017	1.59507	1.69352	0.699061	1.01194	0.546008	0.697042	0.631209	0.219713	0.603574	0.386911	0.614639	0.809849	0.018413	0.61882	0.394492	0.164241	0.472453	-0.08254	-0.07899	-0.42928	0.231891	-0.30037	0.288513	0.156949	-0.09757	-0.56678	-0.55305	-0.40513	-0.72459	-0.4449	0.209092	-0.67049	-0.21764	-0.69783	-0.54078	-0.56936	-1.2026	-0.4038	-0.26511	-0.58358	-0.5939	-0.77612	-0.70295	-1.21645	-0.52078
0.617229	1.67274	0.309496	0.703407	1.06016	1.5914	1.6778	0.63578	1.10009	0.522737	0.727689	0.641818	0.295308	0.53267	0.31518	0.576113	0.922235	0.053192	0.54462	0.543987	0.180965	0.524825	-0.09411	-0.149	-0.38994	0.200323	-0.2577	0.291334	0.119027	-0.07464	-0.53756	-0.5485	-0.41199	-0.66856	-0.43716	0.139082	-0.59622	-0.20061	-0.73458	-0.48685	-0.61405	-1.19276	-0.38147	-0.25809	-0.58016	-0.59358	-0.73153	-0.70241	-1.17776	-0.49474
0.613088	1.68519	0.325064	0.73155	1.08861	1.56962	1.6828	0.589126	1.13768	0.520004	0.781971	0.627137	0.331517	0.558747	0.260988	0.493047	0.933075	0.064905	0.524862	0.692997	0.1948	0.536859	-0.06596	-0.21138	-0.37462	0.208442	-0.23192	0.247864	0.102225	-0.11315	-0.60742	-0.56065	-0.37905	-0.63015	-0.42304	0.252362	-0.5469	-0.17436	-0.6163	-0.47744	-0.62005	-1.2012	-0.41248	-0.25324	-0.5793	-0.57702	-0.72976	-0.6362	-1.1288	-0.44217
0.633713	1.67827	0.383714	0.727963	1.1115	1.51199	1.6486	0.560679	1.10273	0.530461	0.838315	0.583821	0.360522	0.583028	0.228563	0.289858	0.914633	0.09967	0.523506	0.788408	0.21721	0.495186	-0.03569	-0.22216	-0.37119	0.207971	-0.25609	0.220149	0.05629	-0.11675	-0.54298	-0.55879	-0.34052	-0.5724	-0.45251	0.227591	-0.57531	-0.1211	-0.5583	-0.52432	-0.63191	-1.18828	-0.44429	-0.26304	-0.56711	-0.58565	-0.73502	-0.6498	-1.15623	-0.4094
0.636347	1.69094	0.409695	0.669999	1.1369	1.54844	1.64256	0.638016	1.07447	0.543011	0.961399	0.540755	0.476199	0.621131	0.267668	0.165557	0.879123	0.120786	0.529686	0.847049	0.217882	0.376671	-0.00213	-0.19224	-0.45836	0.223618	-0.31664	0.168174	0.004314	-0.18682	-0.55215	-0.54502	-0.30067	-0.58184	-0.50634	0.307768	-0.55383	-0.10559	-0.54484	-0.50256	-0.67264	-1.17756	-0.43977	-0.27404	-0.56234	-0.57195	-0.79096	-0.62859	-1.1437	-0.41658
0.679651	1.72969	0.447186	0.694181	1.17433	1.59207	1.62396	0.757263	1.08133	0.504393	0.969505	0.52004	0.548599	0.61184	0.304248	0.114314	0.825206	0.179962	0.524201	0.802493	0.18882	0.259708	0.038554	-0.2017	-0.50433	0.160546	-0.36111	0.114282	-0.04242	-0.22681	-0.42644	-0.54174	-0.30172	-0.59601	-0.54038	0.178112	-0.48476	-0.11206	-0.56229	-0.51298	-0.68155	-1.16096	-0.43727	-0.25801	-0.55927	-0.56829	-0.78331	-0.70805	-1.12477	-0.45668
0.685897	1.81946	0.414192	0.69929	1.22983	1.65065	1.56969	0.819608	1.07058	0.553738	1.05069	0.498876	0.599807	0.599229	0.330273	0.131393	0.770884	0.172477	0.536485	0.778353	0.183613	0.161767	0.022991	-0.13493	-0.50949	0.146833	-0.409	0.04999	-0.04532	-0.20821	-0.42425	-0.53441	-0.33732	-0.57146	-0.48341	0.212511	-0.42906	-0.1733	-0.59807	-0.48865	-0.6721	-1.16399	-0.41813	-0.31494	-0.58361	-0.57215	-0.80822	-0.76921	-1.10312	-0.4946
0.752866	1.89744	0.475382	0.731076	1.31465	1.70355	1.5319	0.923241	1.02699	0.537936	1.03616	0.540188	0.504775	0.563756	0.338203	0.262557	0.748725	0.218464	0.556829	0.649488	0.143883	0.187151	0.003636	-0.10932	-0.45867	0.137451	-0.38487	0.032675	-0.06417	-0.12172	-0.38068	-0.50463	-0.39953	-0.53529	-0.45546	0.150795	-0.42419	-0.20446	-0.54823	-0.45207	-0.60182	-1.17601	-0.41999	-0.33562	-0.60212	-0.56451	-0.73178	-0.77598	-1.12912	-0.4721
0.7769	1.92777	0.44812	0.720245	1.34247	1.67353	1.45406	0.962087	0.987131	0.589284	1.04974	0.515524	0.440762	0.526255	0.32004	0.331529	0.762154	0.210166	0.512742	0.635037	0.176622	0.311778	-0.04896	-0.06249	-0.42314	0.207477	-0.30309	0.056136	-0.08738	-0.04139	-0.41823	-0.49917	-0.40395	-0.48076	-0.4602	0.324908	-0.40281	-0.2475	-0.5866	-0.38444	-0.62377	-1.16841	-0.40612	-0.38857	-0.59503	-0.56153	-0.77363	-0.75222	-1.16157	-0.46879
0.799847	1.89915	0.499878	0.736351	1.38851	1.65779	1.48279	1.03839	1.01879	0.618215	1.02278	0.521591	0.488548	0.543321	0.365141	0.251267	0.758411	0.247889	0.487694	0.672207	0.231722	0.454391	-0.05851	-0.06095	-0.41441	0.239623	-0.24221	0.056771	-0.12126	-0.00295	-0.42251	-0.51806	-0.36805	-0.48336	-0.40445	0.321255	-0.33548	-0.26561	-0.49105	-0.28649	-0.61695	-1.13893	-0.40595	-0.36409	-0.5611	-0.55065	-0.79193	-0.69097	-1.12272	-0.46873
0.763691	1.83973	0.471966	0.711237	1.38986	1.59207	1.42113	1.05129	1.12175	0.638415	1.03762	0.460247	0.526262	0.597825	0.400013	0.11547	0.749575	0.232341	0.506355	0.71565	0.302234	0.502143	-0.06271	-0.05426	-0.43275	0.275318	-0.20491	0.05687	-0.16807	-0.08578	-0.38291	-0.51743	-0.32565	-0.4994	-0.36063	0.395893	-0.30163	-0.30079	-0.43888	-0.29336	-0.62464	-1.09334	-0.47285	-0.39408	-0.54852	-0.5711	-0.86809	-0.68182	-1.07002	-0.48779
0.785138	1.76244	0.493687	0.707135	1.42038	1.54072	1.40441	1.07067	1.08697	0.648551	1.02525	0.438239	0.580853	0.667766	0.399073	0.026341	0.741397	0.254814	0.540602	0.667856	0.328257	0.452461	-0.06317	-0.00951	-0.45147	0.288357	-0.22652	0.062042	-0.15705	-0.19125	-0.41522	-0.5007	-0.33587	-0.52511	-0.33806	0.350029	-0.28646	-0.32167	-0.36036	-0.31262	-0.56047	-1.06184	-0.45715	-0.39239	-0.54883	-0.56929	-0.81844	-0.6695	-1.07042	-0.47905
0.806136	1.73585	0.501129	0.712807	1.48081	1.4587	1.34925	1.0949	1.0618	0.642751	0.998458	0.424884	0.563309	0.739498	0.344494	0.153974	0.695395	0.25894	0.628282	0.486002	0.334423	0.392834	-0.02151	0.050069	-0.38648	0.280242	-0.23535	0.041827	-0.13404	-0.206	-0.46638	-0.46117	-0.33988	-0.51736	-0.32648	0.319267	-0.29751	-0.31431	-0.3131	-0.37246	-0.5444	-1.04092	-0.43644	-0.4172	-0.58768	-0.56199	-0.81956	-0.6535	-1.06433	-0.44654
0.828953	1.70819	0.480549	0.731043	1.53223	1.42318	1.35069	1.0901	0.974808	0.660614	0.894615	0.399186	0.57279	0.759306	0.346813	0.267377	0.63074	0.288548	0.611326	0.275512	0.346744	0.312156	0.012692	0.064058	-0.36742	0.23717	-0.25437	0.04193	-0.15075	-0.13386	-0.47045	-0.45955	-0.30148	-0.54326	-0.34533	0.397706	-0.1949	-0.31551	-0.38529	-0.38471	-0.52764	-1.02239	-0.35543	-0.41148	-0.59114	-0.54765	-0.78342	-0.67969	-1.05692	-0.45425
0.824997	1.71574	0.520943	0.778851	1.54218	1.35854	1.27004	1.11964	0.938762	0.600633	0.946039	0.371231	0.514236	0.748871	0.385202	0.301879	0.562271	0.299285	0.629099	0.289251	0.407928	0.235505	0.072195	0.041517	-0.34932	0.198811	-0.29967	0.030472	-0.18161	-0.08574	-0.46484	-0.46699	-0.27836	-0.56624	-0.29017	0.315662	-0.1396	-0.31973	-0.51413	-0.3695	-0.51312	-1.00703	-0.37058	-0.42251	-0.60728	-0.57056	-0.80087	-0.708	-1.01386	-0.5213
0.881394	1.67747	0.558576	0.760038	1.52232	1.33346	1.18767	1.10966	1.01995	0.630476	1.01313	0.342863	0.586841	0.741576	0.42319	0.267776	0.527509	0.28757	0.616783	0.276507	0.425528	0.179686	0.08951	-0.02082	-0.30661	0.192743	-0.31078	0.076103	-0.22356	-0.16367	-0.41375	-0.49058	-0.25983	-0.60029	-0.34957	0.312921	-0.04508	-0.3338	-0.63478	-0.39794	-0.45672	-1.00593	-0.39849	-0.46573	-0.59024	-0.57801	-0.76997	-0.76312	-1.05919	-0.58277
0.925551	1.70582	0.661141	0.782546	1.51902	1.33266	1.10781	1.12588	0.993052	0.590114	1.023	0.355609	0.570085	0.745083	0.368781	0.186791	0.527327	0.302575	0.633673	0.363386	0.478967	0.152669	0.091238	-0.04746	-0.2694	0.225073	-0.33441	0.063365	-0.20574	-0.12157	-0.42905	-0.50845	-0.22509	-0.60589	-0.33578	0.199934	-0.06255	-0.35323	-0.54438	-0.40017	-0.4324	-0.98103	-0.42008	-0.50472	-0.58064	-0.60037	-0.74559	-0.7688	-1.06128	-0.68141
0.966496	1.69627	0.676366	0.752243	1.52472	1.43287	1.06513	1.12297	1.09762	0.683573	0.892022	0.394273	0.573136	0.709749	0.386671	0.141185	0.532967	0.357015	0.589698	0.213346	0.443414	0.122097	0.060862	-0.10501	-0.22143	0.241626	-0.34585	0.006196	-0.24269	-0.16305	-0.32641	-0.50892	-0.21221	-0.62372	-0.3841	0.243787	-0.04065	-0.36133	-0.49736	-0.41853	-0.40496	-0.95875	-0.43567	-0.51568	-0.59123	-0.59506	-0.68316	-0.78499	-1.03988	-0.70596
0.97825	1.70188	0.712791	0.756882	1.513	1.47479	1.04583	1.15984	1.0324	0.659706	0.731751	0.412368	0.454731	0.658696	0.385358	0.195217	0.562589	0.390622	0.54778	0.073636	0.421154	0.057634	0.041365	-0.13096	-0.30229	0.208917	-0.36636	-0.05799	-0.2517	-0.10696	-0.23017	-0.49473	-0.21953	-0.58724	-0.37626	0.207055	-0.08526	-0.38535	-0.5137	-0.3752	-0.44767	-0.93067	-0.41995	-0.51254	-0.59437	-0.6159	-0.57423	-0.78252	-0.95884	-0.76062
0.988155	1.65142	0.731797	0.755162	1.47921	1.41774	1.04717	1.1366	1.04966	0.74016	0.688432	0.430172	0.481967	0.609753	0.38605	0.165853	0.544499	0.420302	0.539926	-0.0338	0.401422	0.016716	0.052857	-0.16587	-0.30328	0.140189	-0.38159	-0.08886	-0.23421	-0.15343	-0.14638	-0.48018	-0.26312	-0.53854	-0.31122	0.182058	-0.0717	-0.37412	-0.46116	-0.43572	-0.44247	-0.91696	-0.44741	-0.51645	-0.60716	-0.61551	-0.52266	-0.81158	-0.93014	-0.77411
1.00433	1.64479	0.773045	0.801973	1.48143	1.35141	1.06823	1.11972	0.953169	0.736535	0.662422	0.405409	0.463668	0.580954	0.358923	0.268303	0.530641	0.427117	0.513571	-0.00224	0.378991	0.015903	0.071432	-0.14113	-0.30625	0.070534	-0.38306	-0.09592	-0.25817	-0.26397	-0.11159	-0.46029	-0.2584	-0.48841	-0.23428	0.163044	-0.06312	-0.39328	-0.40036	-0.47561	-0.4477	-0.91097	-0.43184	-0.53997	-0.60884	-0.63198	-0.50181	-0.80169	-0.88896	-0.7962
1.01054	1.64159	0.740758	0.840314	1.4303	1.25206	1.07068	1.08943	0.930781	0.734473	0.634771	0.359141	0.423652	0.544078	0.308046	0.144478	0.534458	0.451431	0.48556	0.19631	0.367692	0.049288	0.071369	-0.1336	-0.28241	-0.00701	-0.33778	-0.09884	-0.292	-0.3304	-0.10356	-0.44309	-0.2298	-0.47966	-0.16941	0.19356	-0.02305	-0.38469	-0.41441	-0.50739	-0.47666	-0.9016	-0.47168	-0.5636	-0.61051	-0.65131	-0.53145	-0.84167	-0.88752	-0.77743
1.06493	1.60253	0.776902	0.892046	1.42125	1.2648	1.08877	1.10885	1.00619	0.679484	0.646663	0.301493	0.468157	0.574572	0.386928	0.209872	0.538153	0.451253	0.532129	0.205169	0.344596	0.091063	0.043187	-0.13088	-0.27154	-0.0667	-0.29052	-0.10032	-0.34221	-0.43753	-0.08364	-0.43692	-0.20728	-0.47478	-0.22474	0.236348	0.030313	-0.40518	-0.48516	-0.45196	-0.5387	-0.89238	-0.43564	-0.57746	-0.60838	-0.64879	-0.53786	-0.79411	-0.86203	-0.73005
1.11629	1.60382	0.823635	0.942272	1.36848	1.24374	1.07455	1.10808	1.11524	0.676475	0.642374	0.304465	0.434165	0.616389	0.384549	0.340203	0.516782	0.396653	0.626674	0.116163	0.281269	0.107347	0.01237	-0.14396	-0.25767	-0.07623	-0.23355	-0.09265	-0.36514	-0.40132	-0.05411	-0.44601	-0.21733	-0.44872	-0.25625	0.312133	0.025532	-0.38844	-0.57632	-0.47684	-0.58608	-0.8649	-0.46059	-0.63844	-0.59885	-0.63509	-0.54688	-0.79899	-0.87451	-0.7254
1.15352	1.59766	0.911039	0.973144	1.38395	1.29519	1.13464	1.08868	1.18385	0.705858	0.6697	0.3479	0.415789	0.660782	0.408004	0.405188	0.506182	0.326792	0.648533	-0.06728	0.302504	0.131372	-0.01868	-0.11567	-0.17614	-0.05719	-0.19749	-0.07776	-0.35272	-0.44724	-0.07838	-0.46296	-0.27722	-0.43938	-0.2419	0.302588	0.000615	-0.37418	-0.64396	-0.48499	-0.59865	-0.84749	-0.36865	-0.66792	-0.60764	-0.63361	-0.54684	-0.77803	-0.82939	-0.74985
1.1657	1.61057	0.962929	0.993228	1.35978	1.26679	1.09924	1.03985	1.11439	0.658335	0.625239	0.375766	0.265456	0.621506	0.318499	0.444776	0.50136	0.237903	0.564312	-0.15532	0.30874	0.164005	-0.07859	-0.06017	-0.1157	0.011678	-0.17983	-0.05504	-0.38682	-0.49039	-0.09873	-0.49039	-0.3267	-0.44648	-0.20503	0.289043	-0.04942	-0.36219	-0.7512	-0.54279	-0.58356	-0.83511	-0.35083	-0.7016	-0.61542	-0.64835	-0.58642	-0.83169	-0.83515	-0.76711
1.20327	1.56562	0.9871	0.966508	1.37863	1.25473	1.10023	1.03147	1.1758	0.666864	0.67032	0.375601	0.341044	0.62085	0.366063	0.268769	0.524913	0.224243	0.555424	-0.19292	0.378244	0.21493	-0.08206	-0.02353	-0.03503	0.060197	-0.13585	-0.03706	-0.38379	-0.52066	-0.10454	-0.48925	-0.36001	-0.44166	-0.23281	0.264403	-0.09456	-0.34362	-0.78974	-0.51442	-0.59395	-0.8049	-0.32799	-0.69885	-0.62897	-0.64601	-0.58745	-0.83929	-0.83833	-0.73056
1.26157	1.56331	0.984639	1.04092	1.37685	1.20295	1.03325	1.04986	1.21517	0.669261	0.700935	0.34567	0.437921	0.621689	0.30293	0.236115	0.509581	0.255535	0.58937	-0.18354	0.353233	0.240092	-0.09701	-0.02003	-0.04611	0.077033	-0.13054	-0.00087	-0.42481	-0.56762	-0.09183	-0.48663	-0.35085	-0.42785	-0.25268	0.284945	-0.09255	-0.35089	-0.78803	-0.5282	-0.58301	-0.77865	-0.38544	-0.71842	-0.61823	-0.62361	-0.58216	-0.8019	-0.91187	-0.70726
1.29952	1.61475	0.977354	1.09697	1.38304	1.11962	1.08588	1.0991	1.41508	0.720298	0.760284	0.356914	0.58919	0.690956	0.349389	0.295636	0.475258	0.283469	0.64969	-0.08062	0.304518	0.242824	-0.07009	-0.06626	-0.09821	0.034612	-0.13275	-0.00769	-0.45128	-0.67648	-0.128	-0.45835	-0.35284	-0.41376	-0.28654	0.185756	-0.09785	-0.36493	-0.75364	-0.52922	-0.55352	-0.73609	-0.3975	-0.71125	-0.60715	-0.6016	-0.55845	-0.74005	-0.90237	-0.74896
1.32045	1.61734	1.00048	1.1128	1.40356	1.03687	1.06755	1.14774	1.47825	0.668408	0.71636	0.342787	0.586519	0.698765	0.301322	0.301835	0.435341	0.342502	0.664843	-0.04995	0.270393	0.215739	-0.07398	-0.08592	-0.13537	-0.01349	-0.1332	0.00197	-0.54367	-0.79535	-0.17734	-0.45294	-0.35716	-0.43367	-0.26962	0.091421	-0.06612	-0.38392	-0.69044	-0.54701	-0.55109	-0.7512	-0.43195	-0.69605	-0.60838	-0.59698	-0.57296	-0.69942	-0.87884	-0.81401
1.34387	1.56577	1.03674	1.10201	1.43626	0.983656	1.05076	1.13864	1.50867	0.692858	0.746653	0.344844	0.642959	0.689639	0.372578	0.377316	0.399243	0.379404	0.614485	-0.04978	0.260799	0.229739	-0.04149	-0.11578	-0.10517	-0.00597	-0.10336	-0.03978	-0.55308	-0.85954	-0.12139	-0.43065	-0.39677	-0.44779	-0.28298	0.130639	-0.04899	-0.37807	-0.70764	-0.52085	-0.5167	-0.75932	-0.39779	-0.67478	-0.62215	-0.59591	-0.6061	-0.71252	-0.80572	-0.87461
1.38015	1.46607	1.06434	1.07451	1.50577	0.958533	0.978875	1.14831	1.44531	0.680846	0.721475	0.326904	0.656433	0.643233	0.390414	0.252799	0.432915	0.476644	0.518889	0.004382	0.282253	0.234965	-0.02661	-0.08212	-0.06577	0.014971	-0.04189	-0.0756	-0.53037	-0.87526	-0.02224	-0.39363	-0.38611	-0.41595	-0.28398	0.208446	-0.00836	-0.38136	-0.72545	-0.45637	-0.5231	-0.77739	-0.42028	-0.68635	-0.61137	-0.59045	-0.6089	-0.68163	-0.76904	-0.82384
1.41083	1.37636	1.10187	1.12964	1.48101	0.890012	0.928431	1.16696	1.33875	0.671053	0.685966	0.340798	0.679045	0.637194	0.360559	0.285938	0.459671	0.519763	0.457681	0.161962	0.245603	0.261113	-0.04415	-0.05858	-0.08543	0.004886	-0.05229	-0.10787	-0.49017	-0.8646	0.028982	-0.38277	-0.38503	-0.37151	-0.2753	0.261387	-0.0047	-0.39108	-0.66562	-0.43498	-0.55725	-0.78032	-0.41687	-0.68664	-0.58927	-0.60332	-0.56428	-0.64878	-0.73083	-0.79763
1.40827	1.27562	1.07686	1.15318	1.44493	0.816627	0.846021	1.15162	1.28534	0.592175	0.605923	0.310108	0.715692	0.642949	0.347428	0.159459	0.49224	0.547501	0.457097	0.210035	0.261391	0.349246	-0.08347	-0.03661	-0.1078	0.050389	-0.05727	-0.1001	-0.47921	-0.80802	-0.01344	-0.41093	-0.35906	-0.36034	-0.29513	0.150872	0.026987	-0.40683	-0.50882	-0.4564	-0.61775	-0.76494	-0.45683	-0.68504	-0.55993	-0.61246	-0.52354	-0.65214	-0.74337	-0.72196
1.46067	1.20745	1.1107	1.23869	1.40179	0.776579	0.762001	1.16707	1.25785	0.50207	0.54519	0.338598	0.641767	0.619272	0.322705	0.20844	0.490639	0.524765	0.45461	0.204378	0.22428	0.405253	-0.1315	-0.09815	-0.07654	0.003774	-0.01466	-0.07472	-0.48933	-0.73302	-0.06152	-0.45642	-0.41275	-0.39309	-0.27847	-0.0085	-0.03336	-0.40056	-0.49274	-0.4643	-0.67374	-0.77036	-0.50917	-0.68409	-0.56879	-0.61909	-0.49913	-0.69461	-0.74373	-0.73949
1.49825	1.2091	1.11287	1.29225	1.42054	0.752285	0.747142	1.13319	1.31034	0.506443	0.567488	0.366674	0.581785	0.576102	0.351208	0.173021	0.494544	0.506011	0.383624	0.234128	0.242324	0.459574	-0.14515	-0.13621	0.003605	-0.01452	0.0656	-0.05845	-0.48003	-0.75667	-0.12755	-0.45037	-0.41863	-0.385	-0.26323	-0.06812	-0.03983	-0.39738	-0.64484	-0.47718	-0.62695	-0.73837	-0.49767	-0.70187	-0.58646	-0.61265	-0.49472	-0.71747	-0.70499	-0.69367
1.52376	1.24971	1.12709	1.34811	1.42281	0.791033	0.74477	1.13153	1.30585	0.465041	0.54343	0.405076	0.416692	0.519665	0.367815	0.312442	0.447647	0.446933	0.32542	0.240398	0.221164	0.417022	-0.15928	-0.16697	-0.02203	-0.05276	0.094263	-0.07984	-0.49193	-0.8012	-0.11635	-0.42746	-0.41355	-0.4261	-0.23571	-0.11713	-0.09716	-0.40176	-0.72734	-0.49834	-0.57913	-0.72722	-0.48162	-0.7051	-0.60322	-0.60604	-0.43797	-0.6787	-0.64929	-0.71224
1.49723	1.25857	1.12381	1.39223	1.42317	0.825724	0.737088	1.10932	1.31282	0.48066	0.534489	0.413845	0.403411	0.478042	0.381513	0.292635	0.441713	0.37316	0.335706	0.17382	0.221778	0.504565	-0.17995	-0.17881	-0.06706	0.024253	0.083996	-0.03793	-0.52639	-0.85937	-0.14961	-0.39962	-0.38838	-0.42842	-0.26183	0.03993	-0.06001	-0.43636	-0.88538	-0.55396	-0.54408	-0.72483	-0.4444	-0.7179	-0.59962	-0.5988	-0.39059	-0.66646	-0.63678	-0.69888
1.49854	1.21161	1.05469	1.44146	1.42115	0.873838	0.720813	1.08275	1.25062	0.442081	0.484943	0.378143	0.485363	0.470069	0.351348	0.227601	0.434769	0.330181	0.312153	0.048639	0.230803	0.599876	-0.21112	-0.19027	-0.12038	0.061353	0.04664	-0.02833	-0.52179	-0.77058	-0.14124	-0.41993	-0.34936	-0.51815	-0.31976	0.030073	0.012553	-0.46132	-0.81952	-0.56436	-0.6079	-0.71401	-0.4625	-0.69571	-0.596	-0.57663	-0.37877	-0.65785	-0.64075	-0.70407
1.51866	1.18579	1.05355	1.45019	1.41541	0.884072	0.763988	1.11749	1.27478	0.453029	0.465128	0.369001	0.546118	0.429177	0.312968	0.273551	0.495375	0.333921	0.174931	0.077966	0.196014	0.734363	-0.19823	-0.19783	-0.1047	0.077256	0.045874	0.019954	-0.54816	-0.68228	-0.14887	-0.40338	-0.30833	-0.49126	-0.32259	0.065845	0.10266	-0.46009	-0.83098	-0.53778	-0.69999	-0.69682	-0.51006	-0.68343	-0.57735	-0.54206	-0.43447	-0.67634	-0.65025	-0.67515
1.54509	1.17615	0.984037	1.41007	1.36507	0.876174	0.764687	1.13622	1.22386	0.416129	0.392498	0.313115	0.56578	0.371891	0.260875	0.290004	0.518849	0.390414	0.067909	0.117459	0.17453	0.779505	-0.20607	-0.13998	-0.1417	0.090887	0.059745	-0.03115	-0.52218	-0.64888	-0.13952	-0.38372	-0.27008	-0.48811	-0.28821	-0.05516	0.157669	-0.46801	-0.66425	-0.49932	-0.7716	-0.65563	-0.52505	-0.66543	-0.54804	-0.53349	-0.44728	-0.62377	-0.64996	-0.64305
1.54492	1.20388	1.03457	1.36844	1.35992	0.869201	0.775971	1.14948	1.21298	0.356978	0.374532	0.285839	0.62406	0.323387	0.277394	0.338846	0.556174	0.442673	0.026889	-0.01358	0.129016	0.783387	-0.1769	-0.12261	-0.1677	0.106372	0.074232	-0.02292	-0.55781	-0.68836	-0.15459	-0.35042	-0.30604	-0.43167	-0.29008	-0.04224	0.203235	-0.46975	-0.65821	-0.46038	-0.74492	-0.62596	-0.51398	-0.67282	-0.51513	-0.49704	-0.45891	-0.58451	-0.65835	-0.65621
1.56809	1.19837	1.04434	1.31335	1.30296	0.820764	0.693151	1.18835	1.16933	0.274427	0.317334	0.296907	0.537762	0.276205	0.274867	0.171305	0.514708	0.462033	0.116796	-0.05827	0.080406	0.761018	-0.17829	-0.10226	-0.23239	0.070665	0.058654	-0.02976	-0.53829	-0.78006	-0.16465	-0.32682	-0.32324	-0.44839	-0.36977	-0.12633	0.200156	-0.49274	-0.69177	-0.49664	-0.71458	-0.5864	-0.52021	-0.71653	-0.49043	-0.49414	-0.47264	-0.60812	-0.69094	-0.64373
1.57611	1.20614	1.15172	1.34108	1.31025	0.862458	0.697528	1.20016	1.22058	0.225844	0.327887	0.34093	0.620271	0.24598	0.340293	0.126347	0.415544	0.383231	0.150369	-0.22012	0.037245	0.74122	-0.10677	-0.17659	-0.21291	0.01823	0.031198	-0.04957	-0.5201	-0.70359	-0.22519	-0.29651	-0.35596	-0.49793	-0.4782	-0.18813	0.15946	-0.47087	-0.6969	-0.49213	-0.66902	-0.55461	-0.48961	-0.72355	-0.48505	-0.45864	-0.50156	-0.63784	-0.69569	-0.6932
1.58391	1.15619	1.18744	1.35017	1.25142	0.794973	0.722197	1.26455	1.26066	0.245548	0.358914	0.370744	0.545529	0.170927	0.389726	0.271788	0.355625	0.255691	0.220467	-0.0762	-0.03731	0.732184	-0.10143	-0.16673	-0.13351	0.040563	0.036728	-0.0362	-0.44619	-0.65193	-0.25777	-0.30135	-0.32651	-0.49297	-0.51508	-0.1426	0.055219	-0.44151	-0.65647	-0.50514	-0.65922	-0.53663	-0.45963	-0.78544	-0.48263	-0.47034	-0.53625	-0.66249	-0.73845	-0.64863
1.59359	1.09901	1.26298	1.41105	1.26589	0.76232	0.747854	1.2809	1.28286	0.247009	0.448133	0.378146	0.635938	0.141386	0.477807	0.369385	0.296544	0.20409	0.287135	-0.20661	-0.06185	0.731544	-0.09265	-0.18803	-0.11171	0.091672	-0.00177	-0.05364	-0.39933	-0.61468	-0.29728	-0.26938	-0.32588	-0.52971	-0.51797	-0.03654	0.013351	-0.43297	-0.64792	-0.4159	-0.65496	-0.52513	-0.42727	-0.77885	-0.49121	-0.45171	-0.50659	-0.59256	-0.7332	-0.70075
1.57763	1.07234	1.21416	1.37045	1.25733	0.665697	0.74676	1.3106	1.24671	0.254969	0.526276	0.346252	0.519172	0.161564	0.498566	0.374069	0.27901	0.220102	0.360636	-0.1544	-0.08023	0.692499	-0.10721	-0.09556	-0.11648	0.120386	-0.02814	-0.01397	-0.3883	-0.6489	-0.30818	-0.2395	-0.27408	-0.54771	-0.49414	0.023139	0.01847	-0.43925	-0.6726	-0.36761	-0.66981	-0.50099	-0.40509	-0.81582	-0.50901	-0.45433	-0.48724	-0.64213	-0.73552	-0.72849
1.562	1.13793	1.21663	1.35749	1.24811	0.739561	0.70413	1.27626	1.17451	0.242887	0.561228	0.308927	0.48903	0.165713	0.542587	0.204447	0.226464	0.199464	0.422035	-0.2599	-0.05779	0.682255	-0.13219	-0.12223	-0.14781	0.118149	-0.09526	-0.02225	-0.39768	-0.65609	-0.29488	-0.25358	-0.27324	-0.62174	-0.46793	-0.087	0.046984	-0.44943	-0.83426	-0.33494	-0.70158	-0.48402	-0.42836	-0.81292	-0.50955	-0.47065	-0.48502	-0.66942	-0.70305	-0.80843
1.52734	1.23213	1.2003	1.27888	1.28947	0.803689	0.64525	1.17399	1.19706	0.296027	0.642115	0.244259	0.46755	0.193522	0.568453	0.20314	0.196763	0.164609	0.462606	-0.15377	-0.03602	0.575098	-0.11328	-0.11487	-0.10391	0.138053	-0.15285	-0.01823	-0.39882	-0.56913	-0.29851	-0.29147	-0.27434	-0.64439	-0.43252	-0.12149	0.03156	-0.44221	-0.81181	-0.31457	-0.70368	-0.46419	-0.39885	-0.8454	-0.52255	-0.4722	-0.53869	-0.66987	-0.70948	-0.85226
1.55402	1.31937	1.27632	1.27663	1.29238	0.870071	0.617588	1.16776	1.14695	0.348662	0.734211	0.23534	0.458009	0.226671	0.572435	0.221526	0.167318	0.083649	0.549573	-0.21516	-0.02714	0.461365	-0.13237	-0.11854	-0.05347	0.13726	-0.21935	0.013333	-0.36931	-0.5518	-0.24606	-0.35474	-0.2962	-0.6564	-0.38202	-0.12806	-0.00676	-0.42506	-0.97835	-0.31222	-0.68729	-0.47293	-0.37593	-0.84063	-0.53024	-0.47958	-0.60407	-0.67126	-0.7477	-0.86951
1.60312	1.37685	1.35701	1.27943	1.35059	0.949816	0.593075	1.23196	1.12729	0.43741	0.803023	0.269259	0.413892	0.365184	0.560564	0.225528	0.112936	0.077755	0.592825	-0.22475	0.013149	0.257601	-0.08427	-0.06587	-0.04669	0.062907	-0.2809	0.059576	-0.34023	-0.48845	-0.20291	-0.30644	-0.34046	-0.65724	-0.35328	-0.11239	-0.04114	-0.42531	-0.87603	-0.32087	-0.60795	-0.46971	-0.3546	-0.85544	-0.56439	-0.45738	-0.61055	-0.6604	-0.81706	-0.91342
1.6553	1.44988	1.40974	1.33816	1.36657	1.04918	0.690487	1.30352	1.13184	0.518998	0.896287	0.281028	0.484685	0.503059	0.541982	0.214309	0.048541	0.025482	0.623069	-0.32417	0.029135	0.128861	-0.11124	-0.02863	-0.05418	-0.03463	-0.32652	0.122538	-0.36857	-0.53091	-0.14284	-0.34871	-0.3696	-0.65029	-0.40488	-0.1457	-0.04106	-0.42493	-0.93015	-0.37721	-0.54102	-0.4632	-0.3259	-0.88358	-0.60596	-0.46351	-0.58394	-0.70635	-0.83166	-0.93541
1.66334	1.48064	1.41591	1.33741	1.38079	1.14458	0.700724	1.29163	1.14632	0.674452	0.945894	0.230393	0.540434	0.592384	0.561329	0.084747	-0.05994	0.057514	0.598343	-0.27289	0.072496	0.019664	-0.08164	-0.00164	-0.01377	-0.16746	-0.40686	0.117766	-0.37893	-0.52143	-0.11296	-0.38209	-0.4112	-0.59215	-0.45573	-0.14143	0.002914	-0.43462	-0.83719	-0.45775	-0.4481	-0.46176	-0.39272	-0.89332	-0.66947	-0.47373	-0.55578	-0.70808	-0.78145	-0.93655
1.66574	1.50734	1.39431	1.28702	1.37937	1.20229	0.702629	1.26552	1.19493	0.739334	0.958349	0.15651	0.506139	0.558219	0.584476	0.177416	-0.08806	0.025567	0.518915	-0.30988	0.033559	0.032314	-0.08615	-0.02664	0.025816	-0.22384	-0.43363	0.047197	-0.4102	-0.50587	-0.11135	-0.42951	-0.39826	-0.59247	-0.50536	-0.28619	0.050311	-0.45877	-0.91466	-0.51103	-0.49368	-0.4711	-0.36099	-0.87636	-0.69962	-0.48971	-0.5258	-0.713	-0.72163	-0.93364
1.6929	1.49049	1.40595	1.26087	1.37865	1.26399	0.719485	1.2777	1.15474	0.760984	0.888493	0.144239	0.303432	0.541311	0.568713	0.105768	-0.09515	0.071959	0.524316	-0.24182	0.032818	0.095231	-0.06592	-0.07243	0.071962	-0.27496	-0.39844	-0.01037	-0.4049	-0.56151	-0.14175	-0.40038	-0.37476	-0.54024	-0.48134	-0.25582	0.080985	-0.51044	-0.89364	-0.53581	-0.53692	-0.46862	-0.36545	-0.8264	-0.70489	-0.49598	-0.51501	-0.70824	-0.69961	-0.89001
1.72776	1.53749	1.42721	1.25157	1.41361	1.34125	0.696146	1.28047	1.23467	0.668988	0.828652	0.138615	0.191674	0.520737	0.547743	0.366047	-0.07141	0.128193	0.497029	-0.13381	-0.0156	0.17948	-0.05028	-0.15205	0.049358	-0.27132	-0.30643	-0.03399	-0.43232	-0.53732	-0.1317	-0.36027	-0.33896	-0.57378	-0.52012	-0.3783	0.109271	-0.55306	-0.91383	-0.54584	-0.58299	-0.4514	-0.33024	-0.80011	-0.68753	-0.51039	-0.4811	-0.7051	-0.70102	-0.86992
1.74579	1.54119	1.44651	1.31663	1.44241	1.35879	0.644122	1.26613	1.24263	0.57153	0.810173	0.129781	0.25614	0.522322	0.502095	0.427676	-0.05805	0.193726	0.455198	-0.06187	-0.05289	0.26614	-0.0477	-0.19951	0.008313	-0.27162	-0.23793	-0.04134	-0.46181	-0.63184	-0.09607	-0.34076	-0.32256	-0.52564	-0.51034	-0.3482	0.116469	-0.59807	-0.76994	-0.55368	-0.56157	-0.39669	-0.35598	-0.80581	-0.66787	-0.52657	-0.47701	-0.683	-0.72309	-0.82078
1.72942	1.52756	1.46767	1.39201	1.42884	1.31378	0.570849	1.29394	1.285	0.500018	0.766477	0.138329	0.336778	0.462939	0.515121	0.617915	-0.06116	0.196326	0.301248	-0.08556	-0.10092	0.340746	-0.04212	-0.17583	0.008707	-0.25782	-0.18872	-0.0715	-0.4889	-0.58777	-0.01073	-0.313	-0.31022	-0.4911	-0.50834	-0.50969	0.076983	-0.62705	-0.68974	-0.5663	-0.54728	-0.3708	-0.38835	-0.8432	-0.64823	-0.53777	-0.46208	-0.69393	-0.71253	-0.7825
1.72072	1.56404	1.50362	1.42228	1.3826	1.24189	0.577223	1.29925	1.22101	0.481063	0.686239	0.165289	0.345046	0.421882	0.475599	0.518703	-0.07136	0.135196	0.208275	-0.16294	-0.13823	0.369163	-0.0181	-0.13687	0.027099	-0.21303	-0.16257	-0.10691	-0.4638	-0.59149	0.101479	-0.30922	-0.29684	-0.40736	-0.43415	-0.41878	-0.00652	-0.65221	-0.61241	-0.562	-0.5378	-0.35558	-0.42234	-0.90645	-0.60401	-0.55175	-0.47023	-0.69232	-0.70029	-0.73333
1.74559	1.57115	1.53398	1.43048	1.3357	1.15829	0.628391	1.25539	1.19782	0.53877	0.5884	0.207445	0.357562	0.407219	0.450854	0.398048	-0.11195	0.086746	0.176096	0.023924	-0.10285	0.287068	0.031475	-0.07385	0.104441	-0.24573	-0.18925	-0.0508	-0.44441	-0.50459	0.215327	-0.29465	-0.31033	-0.37458	-0.40976	-0.5159	-0.08159	-0.6482	-0.6769	-0.54	-0.5003	-0.33861	-0.43076	-0.95473	-0.58313	-0.54428	-0.46156	-0.76612	-0.69807	-0.75266
1.79648	1.58081	1.59135	1.37296	1.29102	1.16427	0.616346	1.22455	1.12576	0.565688	0.572553	0.2277	0.351203	0.3967	0.411026	0.334737	-0.1638	0.005798	0.203821	0.184643	-0.11717	0.166138	0.05735	-0.03709	0.115305	-0.32946	-0.23472	-0.02258	-0.38971	-0.49168	0.242838	-0.301	-0.31479	-0.36644	-0.38417	-0.56501	-0.12809	-0.64402	-0.72869	-0.54369	-0.46485	-0.32359	-0.44197	-1.00946	-0.58073	-0.53979	-0.45164	-0.78399	-0.71895	-0.77982
1.79712	1.48842	1.59784	1.43119	1.25839	1.14721	0.611809	1.2531	1.15789	0.588155	0.520352	0.233075	0.393444	0.365822	0.378736	0.405725	-0.19424	-0.00643	0.215332	0.195578	-0.11235	0.086403	0.060199	-0.03752	0.151757	-0.46998	-0.29622	0.008629	-0.42477	-0.46555	0.238615	-0.27175	-0.3416	-0.38332	-0.38666	-0.72486	-0.11401	-0.63191	-0.77831	-0.51357	-0.44682	-0.27115	-0.4179	-1.03531	-0.62066	-0.53047	-0.4415	-0.76939	-0.74356	-0.88415
1.81265	1.46372	1.6429	1.41177	1.22878	1.1856	0.619526	1.32807	1.19614	0.585444	0.514811	0.283064	0.304115	0.310599	0.374407	0.601103	-0.20438	-0.03809	0.190689	-0.01186	-0.15977	0.100413	0.024893	-0.01041	0.15324	-0.52489	-0.2958	-0.01253	-0.39215	-0.40957	0.193557	-0.22872	-0.3254	-0.33033	-0.40609	-0.74707	-0.17304	-0.64579	-0.78372	-0.4793	-0.4321	-0.23987	-0.39861	-1.06199	-0.63	-0.52694	-0.46284	-0.71528	-0.72438	-0.92219
1.82439	1.4361	1.6286	1.46901	1.21711	1.1593	0.637842	1.31616	1.32313	0.5437	0.484724	0.258194	0.324009	0.245492	0.388117	0.70656	-0.19704	0.013454	0.125593	0.009843	-0.16366	0.110791	0.040691	-0.09681	0.188753	-0.53832	-0.30536	0.096218	-0.357	-0.44913	0.17154	-0.1915	-0.33846	-0.29483	-0.42731	-0.80789	-0.21021	-0.61991	-0.79848	-0.47577	-0.44085	-0.19825	-0.39905	-1.07862	-0.61907	-0.52898	-0.49108	-0.73975	-0.78128	-0.99394
1.8675	1.37878	1.61754	1.49023	1.20743	1.1502	0.628757	1.26659	1.29269	0.491185	0.380642	0.265324	0.245589	0.226442	0.386928	0.735077	-0.16766	0.022315	0.070888	-0.01256	-0.16519	0.123886	0.051762	-0.14967	0.215862	-0.52693	-0.31632	0.176	-0.29898	-0.47583	0.129024	-0.1673	-0.32677	-0.20118	-0.49925	-0.85088	-0.27565	-0.615	-0.79698	-0.51752	-0.44323	-0.16046	-0.45411	-1.06031	-0.59386	-0.50311	-0.49966	-0.74918	-0.83486	-0.97497
1.87777	1.38371	1.59046	1.57005	1.24504	1.14094	0.644164	1.20055	1.34012	0.43495	0.448338	0.267613	0.280008	0.256927	0.424722	0.630323	-0.15031	0.071439	0.077033	0.179974	-0.09509	0.104264	0.131506	-0.18504	0.240904	-0.51706	-0.32014	0.191885	-0.31478	-0.5295	0.079786	-0.16626	-0.32968	-0.15165	-0.53613	-0.90793	-0.28035	-0.6005	-0.82841	-0.55486	-0.47611	-0.13636	-0.48684	-1.01463	-0.59165	-0.49776	-0.4678	-0.8165	-0.81965	-0.98048
1.86544	1.3896	1.54913	1.57643	1.29112	1.15917	0.6595	1.20606	1.2486	0.390931	0.419236	0.306043	0.224881	0.273176	0.38108	0.537994	-0.15669	0.06811	0.092581	0.135204	-0.04222	0.060692	0.163364	-0.0799	0.231737	-0.5545	-0.37274	0.10526	-0.33216	-0.36524	0.057176	-0.16253	-0.33249	-0.1262	-0.56656	-1.00757	-0.25188	-0.6105	-0.88627	-0.58496	-0.4447	-0.13279	-0.51141	-0.97563	-0.60813	-0.50351	-0.48128	-0.80073	-0.76527	-0.99121
1.89007	1.44048	1.55374	1.55889	1.31741	1.20155	0.741953	1.24171	1.24061	0.416332	0.508233	0.368736	0.319918	0.263133	0.376568	0.351906	-0.14534	0.037608	0.106994	0.248351	0.038143	0.032812	0.126112	-0.02318	0.231629	-0.57286	-0.36552	0.02415	-0.33279	-0.34121	0.057488	-0.18072	-0.32428	-0.09289	-0.50847	-0.94634	-0.2594	-0.58596	-0.89987	-0.53786	-0.41138	-0.17068	-0.47775	-0.99022	-0.61596	-0.5016	-0.50098	-0.8254	-0.70044	-1.00451
1.87925	1.4229	1.55117	1.52412	1.32663	1.20442	0.830908	1.26874	1.21505	0.40505	0.461888	0.368835	0.37059	0.203462	0.350982	0.285254	-0.16063	0.029284	0.143714	0.164511	0.039236	0.077023	0.081086	-0.06136	0.3165	-0.55591	-0.33658	0.005498	-0.26455	-0.29705	0.113706	-0.19256	-0.28082	-0.04035	-0.48291	-0.87782	-0.2298	-0.52886	-0.8839	-0.56518	-0.38418	-0.19097	-0.50567	-1.00878	-0.60679	-0.48274	-0.5521	-0.78999	-0.69055	-1.01321
1.87816	1.42362	1.56903	1.49513	1.29574	1.21587	0.928267	1.26396	1.16197	0.440021	0.41937	0.360979	0.461929	0.22365	0.342125	0.278073	-0.13562	-0.00978	0.146384	0.126397	0.037118	0.11258	0.005158	-0.1674	0.362593	-0.51359	-0.26751	-0.04471	-0.2562	-0.38924	0.126466	-0.19625	-0.22239	0.033125	-0.46743	-0.67352	-0.22423	-0.45844	-0.81754	-0.55558	-0.38737	-0.23992	-0.50036	-1.04249	-0.59133	-0.46126	-0.59105	-0.77378	-0.65387	-0.96919
1.88784	1.39815	1.59982	1.50259	1.32121	1.19813	0.988066	1.18099	1.13959	0.334146	0.422979	0.335021	0.445099	0.210766	0.323505	0.314367	-0.12459	0.033161	0.142527	0.206063	0.021534	0.1676	0.004361	-0.22965	0.366153	-0.44729	-0.21827	-0.04073	-0.23974	-0.42296	0.116011	-0.20861	-0.17608	0.050498	-0.45499	-0.67418	-0.1775	-0.38678	-0.66398	-0.60409	-0.39737	-0.2676	-0.56156	-1.02029	-0.55712	-0.45038	-0.60885	-0.74165	-0.66037	-0.90074
1.90925	1.38868	1.58471	1.53321	1.27108	1.23795	1.01501	1.14835	0.990776	0.22514	0.341155	0.31063	0.300585	0.186425	0.186926	0.355176	-0.14337	0.074116	0.068906	0.176683	-0.00052	0.119128	-0.05032	-0.27735	0.266665	-0.4204	-0.24194	-0.05726	-0.29468	-0.47802	0.066101	-0.25044	-0.17814	0.01951	-0.45542	-0.73621	-0.10135	-0.34934	-0.53974	-0.63455	-0.35213	-0.28947	-0.61287	-0.97472	-0.54375	-0.46372	-0.64705	-0.77507	-0.64943	-0.87081
1.91381	1.40152	1.60244	1.58632	1.26803	1.31014	1.06475	1.10336	0.898709	0.17712	0.376056	0.311398	0.203714	0.133657	0.133142	0.326061	-0.20156	0.148124	0.022751	0.027555	-0.02544	0.056841	-0.0501	-0.25469	0.28051	-0.39504	-0.25872	-0.07682	-0.32061	-0.52333	0.114265	-0.28746	-0.21449	0.005641	-0.41204	-0.77907	-0.01822	-0.34239	-0.35126	-0.6518	-0.28671	-0.27925	-0.65767	-0.89241	-0.5338	-0.48609	-0.61685	-0.79115	-0.61978	-0.86857
1.88523	1.44919	1.61096	1.64711	1.23149	1.36298	1.11834	1.08739	0.843889	0.262199	0.368023	0.312681	0.066159	0.084303	0.072978	0.216979	-0.26742	0.128565	-0.02041	-0.16185	-0.03088	-0.02756	-0.02411	-0.24241	0.316963	-0.46244	-0.27852	-0.11816	-0.35999	-0.49928	0.177489	-0.28889	-0.25875	-0.01274	-0.44294	-0.89647	0.012551	-0.369	-0.20676	-0.67619	-0.25678	-0.2796	-0.65504	-0.88177	-0.57248	-0.50588	-0.64018	-0.78337	-0.58342	-0.87382
1.92016	1.45525	1.63723	1.71379	1.23509	1.38889	1.18463	1.09736	0.853915	0.400269	0.425727	0.312766	0.176631	0.109441	0.06865	0.028898	-0.32249	0.060932	-0.06546	-0.25946	0.028889	-0.11359	0.019678	-0.19724	0.341549	-0.58816	-0.30607	-0.11893	-0.34881	-0.43099	0.200853	-0.26638	-0.27269	-0.00261	-0.43875	-0.89273	0.000208	-0.3682	-0.04179	-0.63517	-0.26044	-0.29736	-0.6182	-0.90641	-0.60853	-0.50782	-0.64765	-0.74567	-0.60705	-0.89505
1.96294	1.38914	1.69435	1.80349	1.2112	1.37512	1.18785	1.08981	0.892413	0.523041	0.364917	0.346906	0.168157	0.073992	0.009538	-0.09716	-0.39466	-0.02601	-0.11559	-0.21651	0.078291	-0.23841	0.066725	-0.16696	0.326152	-0.66322	-0.33663	-0.0447	-0.34745	-0.30335	0.146168	-0.248	-0.29898	0.012751	-0.4828	-0.79804	0.010512	-0.32003	0.169643	-0.66311	-0.21253	-0.28856	-0.63395	-0.91998	-0.64959	-0.4935	-0.58641	-0.70363	-0.64339	-0.92321
2.00976	1.29905	1.74998	1.90472	1.16765	1.38718	1.17009	1.06914	0.833128	0.629379	0.362063	0.353996	0.192303	0.080689	-0.03129	-0.02672	-0.45988	-0.08976	-0.14175	-0.24771	0.071227	-0.40147	0.072124	-0.07606	0.285426	-0.68384	-0.4164	-0.02189	-0.37329	-0.22156	0.176156	-0.24833	-0.29696	0.039326	-0.43939	-0.6521	0.053389	-0.2898	0.255042	-0.68684	-0.2084	-0.28064	-0.67199	-0.92989	-0.68713	-0.46875	-0.5954	-0.68667	-0.62628	-0.96488
2.02503	1.27108	1.83451	1.99047	1.10644	1.42772	1.15419	0.982884	0.802086	0.709348	0.297878	0.412341	0.102118	0.033414	-0.04355	0.155872	-0.54159	-0.12233	-0.17709	-0.24638	-0.00782	-0.57032	0.097435	0.048853	0.308786	-0.74861	-0.48841	-0.06199	-0.39118	-0.26114	0.211484	-0.2408	-0.30038	0.045747	-0.44906	-0.55007	0.043525	-0.26792	0.257213	-0.71116	-0.21785	-0.2662	-0.69406	-0.95584	-0.73968	-0.45873	-0.52219	-0.6752	-0.58165	-1.02141
2.03805	1.34131	1.84255	1.97161	1.06399	1.46749	1.14558	0.955006	0.821457	0.744817	0.317944	0.417416	0.080006	0.022076	-0.02023	0.209867	-0.5404	-0.16376	-0.1654	-0.21627	-0.04647	-0.65059	0.098606	0.138305	0.358075	-0.83036	-0.51877	-0.09979	-0.3921	-0.33561	0.317411	-0.22351	-0.30319	0.027445	-0.40238	-0.6635	0.006127	-0.27334	0.116605	-0.70109	-0.28402	-0.27418	-0.68888	-0.97559	-0.76413	-0.47852	-0.58174	-0.71104	-0.56981	-1.06002
2.05991	1.39557	1.88416	1.90718	1.05883	1.50864	1.19256	1.01917	0.847411	0.69515	0.281323	0.469712	0.010571	-0.00152	-0.03612	0.236717	-0.52889	-0.15126	-0.1718	-0.18298	-0.08091	-0.69548	0.140485	0.121942	0.382888	-0.90794	-0.53602	-0.11192	-0.39268	-0.34333	0.229568	-0.20523	-0.32108	-0.05885	-0.43391	-0.82257	-0.06577	-0.27286	0.027718	-0.7426	-0.32556	-0.28212	-0.69108	-0.97612	-0.7745	-0.53861	-0.58629	-0.77819	-0.57156	-1.13554
2.07229	1.4066	1.84926	1.90493	1.0593	1.53888	1.17461	1.04157	0.837941	0.704555	0.200789	0.450206	-0.01244	-0.01984	0.005233	0.091979	-0.49816	-0.1187	-0.17533	-0.23668	-0.05496	-0.68533	0.188536	0.060004	0.385325	-0.8694	-0.50385	-0.13484	-0.45077	-0.27869	0.177836	-0.20959	-0.36495	-0.0917	-0.40972	-0.78296	-0.07721	-0.28432	0.039989	-0.79362	-0.26621	-0.26869	-0.72614	-0.90932	-0.76109	-0.57726	-0.61858	-0.81243	-0.52489	-1.13275
2.12111	1.35428	1.90368	1.93682	1.0786	1.49365	1.18774	1.0574	0.818294	0.740073	0.089258	0.485183	-0.00867	-0.02034	-0.02492	0.002738	-0.51418	-0.05938	-0.2896	-0.35841	-0.03874	-0.69279	0.23779	0.041633	0.384514	-0.84797	-0.48453	-0.18668	-0.46741	-0.2676	0.113385	-0.23698	-0.3627	-0.12173	-0.41267	-0.67105	-0.12797	-0.29736	0.035453	-0.77613	-0.25462	-0.25719	-0.76372	-0.89395	-0.77583	-0.5445	-0.61378	-0.78632	-0.466	-1.16051
2.18118	1.28135	1.86485	1.99834	1.06324	1.44192	1.20192	1.02441	0.784897	0.873317	0.042334	0.487136	0.123039	-0.00173	-0.0335	-0.17147	-0.50945	-0.01208	-0.32803	-0.40735	0.039475	-0.70036	0.24385	0.118038	0.407686	-0.83662	-0.46627	-0.26329	-0.52347	-0.32736	0.169454	-0.25172	-0.34818	-0.11017	-0.39603	-0.5084	-0.11692	-0.29297	0.077181	-0.72509	-0.22071	-0.25325	-0.7465	-0.84119	-0.77403	-0.51178	-0.57863	-0.75712	-0.3938	-1.12684
2.25895	1.25492	1.90721	1.99114	1.03968	1.37875	1.26822	1.02611	0.788452	0.932053	0.043327	0.563689	0.148265	0.040492	-0.08737	-0.27036	-0.52003	0.024994	-0.34021	-0.37565	0.100189	-0.75099	0.264911	0.180412	0.414686	-0.86238	-0.50799	-0.27804	-0.56067	-0.31463	0.260379	-0.28594	-0.32918	-0.08378	-0.36335	-0.50925	-0.13961	-0.32237	0.037112	-0.68852	-0.27435	-0.29016	-0.75912	-0.80568	-0.77908	-0.49938	-0.54413	-0.70762	-0.39848	-1.07441
2.26718	1.25528	1.88815	2.02535	0.99223	1.35877	1.29974	1.04406	0.73532	0.942227	0.119703	0.590179	0.199553	0.066591	-0.07738	-0.35453	-0.52553	0.096034	-0.28855	-0.38122	0.149395	-0.7748	0.291967	0.181128	0.364053	-0.93634	-0.54785	-0.32117	-0.63637	-0.28497	0.334189	-0.27977	-0.3582	-0.07929	-0.38452	-0.66586	-0.12147	-0.37893	0.162425	-0.65956	-0.29978	-0.31382	-0.74341	-0.76097	-0.77534	-0.50859	-0.52903	-0.65792	-0.38353	-1.09136
2.23839	1.23615	1.88628	2.02837	0.97728	1.36023	1.30287	1.0778	0.743469	0.876996	0.200888	0.604297	0.24157	0.104872	-0.03226	-0.38953	-0.55954	0.076682	-0.31314	-0.47403	0.166617	-0.8283	0.378838	0.158305	0.34777	-0.98323	-0.55135	-0.3679	-0.67992	-0.27907	0.346329	-0.29285	-0.38244	-0.02747	-0.3429	-0.6845	-0.1093	-0.471	0.267405	-0.66674	-0.30373	-0.34864	-0.75932	-0.73121	-0.77759	-0.53228	-0.52514	-0.65154	-0.38885	-1.11258
2.21375	1.1923	1.91313	2.04705	0.98307	1.31469	1.28447	1.14546	0.711376	0.818187	0.26094	0.588346	0.333647	0.153798	-0.03376	-0.35901	-0.58364	0.094205	-0.32177	-0.37885	0.135306	-0.81026	0.436794	0.190083	0.374947	-0.98338	-0.56231	-0.40933	-0.72472	-0.36982	0.337152	-0.27888	-0.37415	0.025042	-0.31444	-0.7879	-0.08108	-0.51159	0.428792	-0.66904	-0.27416	-0.36706	-0.77471	-0.73509	-0.77634	-0.52152	-0.53706	-0.65161	-0.36538	-1.15546
2.22654	1.15024	1.90009	2.03444	1.01097	1.2994	1.28765	1.21873	0.740337	0.76646	0.227345	0.5687	0.339146	0.181451	-0.02106	-0.30641	-0.61833	0.064423	-0.33583	-0.30597	0.107453	-0.77682	0.498829	0.205494	0.377159	-0.89754	-0.57637	-0.45532	-0.7642	-0.4927	0.213559	-0.28116	-0.33375	0.059351	-0.28224	-0.77809	-0.03977	-0.5396	0.355142	-0.70293	-0.22084	-0.40645	-0.77722	-0.74198	-0.76605	-0.56126	-0.53117	-0.69261	-0.35464	-1.11236
2.27398	1.23734	1.93527	2.04406	0.991986	1.27511	1.23574	1.19906	0.710999	0.760962	0.261551	0.542646	0.242089	0.148014	-0.00922	-0.1871	-0.64683	0.153957	-0.35202	-0.26287	0.029963	-0.72774	0.475381	0.249848	0.410783	-0.82933	-0.62742	-0.41754	-0.73014	-0.47345	0.181335	-0.26427	-0.33752	0.103544	-0.3122	-0.75445	-0.02668	-0.54927	0.202399	-0.67196	-0.15895	-0.39911	-0.7713	-0.75493	-0.76557	-0.54605	-0.51748	-0.70306	-0.3835	-1.1
2.26993	1.36286	1.89735	2.07359	0.997369	1.28628	1.1841	1.15787	0.730349	0.701043	0.259375	0.501286	0.144567	0.135986	0.061566	-0.11688	-0.64589	0.187592	-0.29142	-0.41714	0.024814	-0.75908	0.441354	0.236148	0.340043	-0.85769	-0.57524	-0.43507	-0.72677	-0.42734	0.192849	-0.23704	-0.37938	0.036276	-0.37467	-0.74941	0.027598	-0.61207	0.126241	-0.68399	-0.14624	-0.38965	-0.72981	-0.78786	-0.75453	-0.5656	-0.47651	-0.70959	-0.42623	-1.11839
2.26684	1.45525	1.95743	2.13219	0.956267	1.27073	1.16671	1.09395	0.684381	0.665908	0.296783	0.523314	0.08966	0.129945	0.10202	-0.12666	-0.57463	0.193326	-0.23725	-0.43572	0.031211	-0.75322	0.440651	0.217007	0.343363	-0.89975	-0.50661	-0.42194	-0.74902	-0.39017	0.277062	-0.26361	-0.37674	0.086497	-0.37396	-0.75386	-0.00651	-0.64952	0.122023	-0.67495	-0.13853	-0.38152	-0.7096	-0.82366	-0.72473	-0.55397	-0.43627	-0.70946	-0.40417	-1.11836
2.26009	1.46533	1.9963	2.1032	0.924242	1.28699	1.17078	1.07267	0.714377	0.696289	0.202632	0.581684	0.164558	0.138226	0.178439	-0.14092	-0.52018	0.16789	-0.1329	-0.45238	0.075475	-0.75931	0.397925	0.173986	0.326962	-0.9353	-0.40117	-0.40065	-0.78566	-0.43831	0.288671	-0.29043	-0.34934	0.078892	-0.33988	-0.82681	0.017411	-0.65404	0.075152	-0.70523	-0.1369	-0.35966	-0.68194	-0.88075	-0.70066	-0.57259	-0.40522	-0.68683	-0.40812	-1.10458
2.25616	1.4909	2.04909	2.09745	0.882895	1.32333	1.20241	1.05442	0.751492	0.781503	0.254409	0.631858	0.213146	0.115242	0.232175	-0.22548	-0.49864	0.127058	-0.06441	-0.48136	0.084068	-0.58928	0.361475	0.17791	0.369106	-0.96154	-0.37214	-0.31752	-0.7674	-0.50315	0.25012	-0.2965	-0.30998	0.174047	-0.3028	-0.87824	-0.01337	-0.61668	-0.09309	-0.68878	-0.0713	-0.33193	-0.60606	-0.93749	-0.69789	-0.56843	-0.4134	-0.66513	-0.41044	-1.05257
2.29508	1.54246	2.03243	2.12175	0.906348	1.37621	1.18733	1.0641	0.86422	0.829225	0.34388	0.635894	0.323917	0.082667	0.262817	-0.17443	-0.53055	0.106158	-0.00142	-0.50251	0.083739	-0.47709	0.269981	0.154782	0.433879	-1.03549	-0.3698	-0.1973	-0.7503	-0.50092	0.296776	-0.27581	-0.33636	0.084432	-0.24407	-0.69684	0.067968	-0.58123	-0.13315	-0.66353	-0.05062	-0.28721	-0.57812	-0.96883	-0.71753	-0.57558	-0.43899	-0.65492	-0.52184	-1.05594
2.31405	1.59313	2.03383	2.13095	0.933451	1.37532	1.14288	1.09954	0.771676	0.853609	0.376707	0.605028	0.386305	0.079291	0.23708	-0.23816	-0.49454	0.058827	0.045513	-0.55758	0.088703	-0.51207	0.248716	0.103292	0.411402	-1.04988	-0.34951	-0.15051	-0.72385	-0.57354	0.392677	-0.24857	-0.35665	0.054383	-0.19205	-0.71259	0.061165	-0.5384	-0.0439	-0.65961	-0.08662	-0.28275	-0.5487	-0.98083	-0.70522	-0.57078	-0.47132	-0.66104	-0.55481	-1.09147
2.33764	1.59879	2.00097	2.12601	0.935406	1.37348	1.13749	1.1425	0.72288	0.920492	0.439455	0.611325	0.408403	0.059535	0.227119	-0.2418	-0.36705	0.076111	0.02955	-0.58766	0.126492	-0.5807	0.236459	0.116863	0.362453	-0.95709	-0.31329	-0.18449	-0.73845	-0.64133	0.45686	-0.28854	-0.36283	-0.08377	-0.19199	-0.64387	0.019792	-0.44917	0.014679	-0.63291	-0.19333	-0.28627	-0.568	-0.96033	-0.68676	-0.57607	-0.48848	-0.67441	-0.54223	-1.13199
2.31685	1.59086	1.98028	2.12491	0.907278	1.3612	1.12134	1.13962	0.584728	1.07146	0.452886	0.597926	0.438316	0.05924	0.236366	-0.25217	-0.29197	0.121368	0.042071	-0.71219	0.09339	-0.69489	0.255063	0.193365	0.348118	-0.91926	-0.32429	-0.26785	-0.72722	-0.67787	0.488622	-0.30144	-0.31295	-0.06168	-0.19839	-0.79679	-0.00903	-0.3557	0.010753	-0.68924	-0.2456	-0.27517	-0.54455	-0.91014	-0.70753	-0.56271	-0.45752	-0.72491	-0.48566	-1.15255
2.31381	1.59516	1.98016	2.17328	0.941045	1.34719	1.18332	1.14306	0.653719	1.20313	0.504989	0.648842	0.410551	0.042719	0.254917	-0.13984	-0.28332	0.201763	0.005044	-0.70144	0.070742	-0.65677	0.288949	0.282609	0.394919	-0.99864	-0.36282	-0.32849	-0.77646	-0.58507	0.529256	-0.33091	-0.27501	-0.10227	-0.171	-0.78184	0.005562	-0.27171	-0.00908	-0.68034	-0.25831	-0.23818	-0.54003	-0.85027	-0.75936	-0.55007	-0.45607	-0.69636	-0.42192	-1.14901
2.31824	1.60416	2.05056	2.16149	1.01438	1.32135	1.18107	1.12505	0.658761	1.2605	0.494276	0.640414	0.485023	0.064612	0.225783	-0.18417	-0.39185	0.174147	0.008628	-0.64886	0.043605	-0.6745	0.314999	0.342238	0.462575	-1.08942	-0.38529	-0.35934	-0.76418	-0.53297	0.596911	-0.29934	-0.26802	-0.07614	-0.06209	-0.73719	0.053767	-0.25573	0.053239	-0.65629	-0.22543	-0.21398	-0.57842	-0.81874	-0.81544	-0.52303	-0.4516	-0.6957	-0.4033	-1.19315
2.33033	1.6586	2.11403	2.11289	1.07875	1.28603	1.21404	1.09588	0.765771	1.25528	0.495752	0.664263	0.432238	0.119655	0.270975	-0.11441	-0.38186	0.167949	0.075519	-0.56968	0.02396	-0.67748	0.343211	0.351283	0.485309	-1.07506	-0.33472	-0.36161	-0.74436	-0.52374	0.576291	-0.27597	-0.29455	-0.13572	0.028635	-0.58939	0.050255	-0.24961	0.051458	-0.62761	-0.24495	-0.20324	-0.57143	-0.8305	-0.83399	-0.50369	-0.45873	-0.67133	-0.36292	-1.2514
2.32098	1.71573	2.115	2.07477	1.14143	1.30525	1.20588	1.10247	0.908647	1.16898	0.57531	0.646703	0.357531	0.140664	0.3265	-0.03985	-0.32929	0.084706	0.095787	-0.53339	-0.00198	-0.60446	0.363211	0.348347	0.501807	-0.93355	-0.26315	-0.31587	-0.63797	-0.59102	0.513521	-0.23783	-0.32559	-0.12269	0.004745	-0.55994	0.044604	-0.26971	0.065291	-0.63267	-0.26591	-0.21505	-0.58717	-0.86122	-0.82955	-0.51872	-0.41988	-0.64843	-0.38202	-1.26622
2.30504	1.76603	2.09221	2.03233	1.17165	1.30224	1.14508	1.14527	0.967922	1.0824	0.581807	0.63318	0.307732	0.142889	0.407989	0.172157	-0.20302	0.059403	0.090528	-0.49498	-0.08859	-0.53459	0.366868	0.281038	0.495498	-0.83284	-0.18497	-0.28209	-0.52889	-0.63498	0.377187	-0.19472	-0.33768	-0.10601	0.014542	-0.55183	0.05507	-0.27757	-0.0271	-0.70236	-0.32865	-0.19513	-0.59681	-0.88395	-0.80357	-0.55168	-0.44435	-0.63776	-0.41328	-1.23128
2.25594	1.74402	2.07253	2.0281	1.17604	1.28746	1.12182	1.18188	0.908175	1.0448	0.582883	0.631745	0.285174	0.161927	0.448575	0.131258	-0.07346	-0.00499	0.077742	-0.46735	-0.09354	-0.40872	0.324115	0.28887	0.485141	-0.70323	-0.14687	-0.28199	-0.45614	-0.58807	0.338659	-0.18726	-0.31712	-0.07595	-0.04399	-0.65323	0.084287	-0.29393	-0.14154	-0.72331	-0.3918	-0.18047	-0.60792	-0.87267	-0.77306	-0.58469	-0.4924	-0.65861	-0.38705	-1.15666
2.23638	1.72899	2.08103	1.99493	1.13798	1.17575	1.10578	1.2063	0.721114	0.983189	0.55563	0.620176	0.233803	0.199189	0.493213	0.190157	-0.09936	-0.05919	0.07812	-0.24888	-0.11547	-0.54205	0.31552	0.290348	0.451414	-0.69069	-0.17609	-0.31181	-0.42515	-0.51773	0.333423	-0.13906	-0.32061	-0.12717	-0.10001	-0.67999	0.09356	-0.32331	-0.1519	-0.68833	-0.40163	-0.1303	-0.60391	-0.8544	-0.76708	-0.60561	-0.53671	-0.71333	-0.38	-1.18353
2.2497	1.71669	2.07474	1.97991	1.10882	1.177	1.16816	1.21386	0.729076	0.905228	0.606171	0.658635	0.173687	0.23353	0.550595	0.320098	-0.10271	-0.10436	0.159671	-0.13572	-0.14864	-0.67998	0.294636	0.223594	0.414894	-0.63796	-0.24239	-0.29839	-0.42183	-0.46929	0.361221	-0.12066	-0.30481	-0.16204	-0.20736	-0.65091	0.088728	-0.34621	-0.14041	-0.63904	-0.39445	-0.0967	-0.55768	-0.83118	-0.74629	-0.5889	-0.54029	-0.70697	-0.34575	-1.19134
2.31527	1.72923	2.09332	1.95565	1.0951	1.25032	1.20561	1.22742	0.711658	0.793629	0.588554	0.695372	0.190049	0.188592	0.503462	0.489446	-0.15284	-0.05399	0.10341	-0.0499	-0.21692	-0.80033	0.338982	0.181847	0.384191	-0.67238	-0.29361	-0.29891	-0.37342	-0.5296	0.296423	-0.08606	-0.30723	-0.15633	-0.29284	-0.69316	0.04624	-0.39662	-0.14843	-0.62561	-0.37395	-0.05743	-0.58748	-0.8171	-0.75592	-0.57322	-0.50024	-0.63459	-0.31176	-1.20813
2.35372	1.71365	2.07312	1.98282	1.0978	1.38659	1.18495	1.18508	0.766531	0.807654	0.632641	0.715652	0.268452	0.150835	0.470993	0.500697	-0.07085	0.027781	0.06121	-0.09966	-0.26354	-0.74499	0.309179	0.158871	0.40211	-0.62017	-0.33222	-0.31685	-0.35469	-0.55375	0.230487	-0.08446	-0.32015	-0.0953	-0.31677	-0.65299	0.033881	-0.41414	-0.22791	-0.67312	-0.34378	-0.07511	-0.61657	-0.80891	-0.72852	-0.5305	-0.44078	-0.59079	-0.21672	-1.21699
2.32277	1.66801	2.01386	1.98296	1.10538	1.42766	1.162	1.13996	0.726559	0.814291	0.577363	0.672075	0.296155	0.103379	0.410958	0.524491	-0.03841	0.050345	-0.07888	-0.11307	-0.27059	-0.73569	0.316402	0.177683	0.466992	-0.65414	-0.34783	-0.34945	-0.31271	-0.49236	0.103475	-0.0343	-0.33916	-0.06555	-0.35453	-0.67272	0.040842	-0.44642	-0.3274	-0.69404	-0.35489	-0.12076	-0.6587	-0.82324	-0.72752	-0.55168	-0.43607	-0.58672	-0.1477	-1.20494
2.26158	1.64124	1.93362	1.92962	1.11557	1.37829	1.13604	1.14278	0.72338	0.785459	0.567997	0.62554	0.292553	0.097252	0.416218	0.461145	-0.04234	0.011747	-0.12878	-0.0857	-0.24223	-0.73807	0.229911	0.157536	0.468238	-0.57947	-0.43862	-0.33469	-0.28498	-0.42233	-0.01082	-0.01083	-0.31716	-0.0347	-0.36673	-0.55474	0.055247	-0.47251	-0.34619	-0.66409	-0.31793	-0.15396	-0.6337	-0.86823	-0.68789	-0.55569	-0.4759	-0.58561	-0.17263	-1.15896
2.23608	1.65406	1.86692	1.8901	1.14943	1.35906	1.14896	1.16613	0.713579	0.690773	0.567996	0.598175	0.463937	0.09269	0.439264	0.463739	-0.06909	-0.01077	-0.12877	-0.1377	-0.23294	-0.7457	0.214462	0.130886	0.423724	-0.43879	-0.46434	-0.29054	-0.21137	-0.50564	-0.12366	0.011457	-0.25276	-0.01655	-0.42277	-0.49624	0.004552	-0.50862	-0.54086	-0.60542	-0.30592	-0.14762	-0.61675	-0.91909	-0.67488	-0.55354	-0.56619	-0.57598	-0.22238	-1.05182
2.22135	1.60495	1.87942	1.87823	1.14179	1.27002	1.12698	1.21954	0.650465	0.600826	0.597313	0.612527	0.569149	0.112015	0.422844	0.2417	-0.1164	0.035124	-0.10256	-0.05079	-0.15229	-0.66755	0.180051	0.190222	0.345788	-0.28104	-0.49457	-0.28838	-0.17831	-0.50873	-0.24096	0.003683	-0.23999	-0.01577	-0.39479	-0.47735	-0.04604	-0.54869	-0.64476	-0.62181	-0.23908	-0.13806	-0.58591	-0.90472	-0.6548	-0.54401	-0.57911	-0.58552	-0.2421	-1.00576
2.19585	1.58376	1.92132	1.86752	1.15488	1.23026	1.09411	1.22088	0.630615	0.556786	0.611482	0.613448	0.695593	0.138216	0.412836	0.312232	-0.09529	0.096803	-0.10048	0.004591	-0.11647	-0.53836	0.171043	0.242827	0.289548	-0.14737	-0.4319	-0.31192	-0.18836	-0.49061	-0.33689	0.007001	-0.27501	0.044638	-0.36797	-0.5108	-0.08922	-0.54374	-0.79026	-0.59568	-0.16528	-0.15205	-0.58827	-0.8888	-0.63271	-0.57196	-0.58959	-0.56179	-0.19167	-0.95611
2.15402	1.51067	1.999	1.86205	1.12622	1.20558	1.05821	1.24491	0.605318	0.561497	0.580464	0.596056	0.635296	0.164436	0.418125	0.324989	-0.06521	0.176736	-0.11977	0.052979	-0.11637	-0.37786	0.144341	0.246515	0.237162	-0.10641	-0.3884	-0.35573	-0.20183	-0.29135	-0.49876	-0.0054	-0.31554	0.132792	-0.32134	-0.58547	-0.09704	-0.55546	-0.79575	-0.63668	-0.11827	-0.17016	-0.55727	-0.83846	-0.59838	-0.60141	-0.58779	-0.55065	-0.19021	-0.8841
2.14614	1.56174	2.01819	1.86192	1.11614	1.2614	1.02114	1.2237	0.62841	0.522694	0.569391	0.572111	0.716933	0.236059	0.4871	0.376381	-0.07889	0.250126	-0.05708	0.118459	-0.11887	-0.26591	0.179141	0.222531	0.22248	-0.07632	-0.39121	-0.39488	-0.24423	-0.14026	-0.51319	-0.02238	-0.31963	0.223397	-0.35789	-0.60299	-0.12793	-0.55836	-0.69134	-0.56223	-0.01942	-0.16775	-0.57534	-0.79104	-0.56803	-0.61241	-0.61272	-0.52104	-0.17467	-0.82831
2.14198	1.58723	2.03132	1.90091	1.07746	1.31784	0.987216	1.19426	0.588723	0.463278	0.545928	0.556778	0.691534	0.31733	0.572446	0.330758	-0.11021	0.265478	0.015601	0.147993	-0.16118	-0.30206	0.165274	0.222769	0.252733	-0.05257	-0.40701	-0.43962	-0.25207	-0.06667	-0.49838	-0.0414	-0.28498	0.250207	-0.38608	-0.59217	-0.1995	-0.58051	-0.51926	-0.5587	-0.01959	-0.16147	-0.63325	-0.74931	-0.56268	-0.59136	-0.66768	-0.55059	-0.15253	-0.7697
2.12599	1.62121	2.00434	1.86647	1.0458	1.33636	0.954939	1.16141	0.518066	0.402122	0.497797	0.556126	0.753014	0.386407	0.573368	0.346232	-0.14977	0.292639	0.081372	0.249549	-0.15226	-0.31385	0.13845	0.215982	0.232635	-0.02868	-0.44452	-0.48676	-0.28529	-0.03161	-0.46428	-0.03623	-0.25646	0.24938	-0.40116	-0.52951	-0.19557	-0.56911	-0.3376	-0.44634	-0.01633	-0.15526	-0.6616	-0.71969	-0.54791	-0.56344	-0.70204	-0.52778	-0.04013	-0.75805
2.11088	1.61168	1.98733	1.81353	1.03666	1.31715	0.885563	1.18129	0.482775	0.370694	0.298301	0.561608	0.616378	0.396693	0.508099	0.380181	-0.12538	0.319632	0.028125	0.311883	-0.1961	-0.37136	0.042637	0.156876	0.198656	-0.03552	-0.44294	-0.49416	-0.27918	-0.12985	-0.42972	-0.01933	-0.24076	0.205147	-0.37096	-0.58273	-0.22301	-0.55499	-0.35386	-0.44909	-0.11369	-0.16351	-0.68813	-0.73272	-0.54443	-0.56288	-0.74189	-0.5668	0.023513	-0.76041
2.08896	1.54965	1.8794	1.74943	1.05593	1.26232	0.775503	1.21724	0.510379	0.342967	0.217782	0.553636	0.625017	0.357432	0.434999	0.29225	-0.13713	0.359813	-0.02719	0.499995	-0.14201	-0.41359	0.117772	0.131859	0.172931	-0.06326	-0.46342	-0.51932	-0.23	-0.07849	-0.40131	-0.00974	-0.24269	0.131194	-0.40064	-0.64025	-0.24134	-0.54775	-0.34117	-0.40815	-0.15839	-0.15044	-0.67851	-0.72747	-0.55562	-0.57146	-0.72885	-0.55767	0.024599	-0.81361
2.10529	1.46985	1.82926	1.68163	1.05383	1.18796	0.705438	1.26161	0.538877	0.357695	0.066119	0.580749	0.447381	0.30701	0.348574	0.347006	-0.12854	0.369506	-0.10838	0.468532	-0.16269	-0.44272	0.191642	0.184684	0.283388	-0.12318	-0.4689	-0.46958	-0.23169	-0.14919	-0.32986	-0.0334	-0.27229	0.04242	-0.4172	-0.67718	-0.3607	-0.51647	-0.35819	-0.45618	-0.21944	-0.13035	-0.71638	-0.73724	-0.58762	-0.55392	-0.74223	-0.59436	-0.06252	-0.8183
2.06126	1.37002	1.78913	1.57169	1.06188	1.12325	0.685212	1.29419	0.495716	0.424036	0.102462	0.624753	0.449411	0.263737	0.344533	0.374209	-0.13738	0.33138	-0.13263	0.435375	-0.15935	-0.50186	0.236972	0.20758	0.31256	-0.20703	-0.48099	-0.45197	-0.18921	-0.14311	-0.31584	-0.04781	-0.26819	-0.0107	-0.4436	-0.73225	-0.40134	-0.46105	-0.3536	-0.43302	-0.27127	-0.09503	-0.69759	-0.76629	-0.60015	-0.50223	-0.7695	-0.52133	-0.09114	-0.81275
2.03139	1.30293	1.77857	1.45077	1.11109	1.04653	0.704681	1.35501	0.415502	0.440708	0.125181	0.605138	0.417759	0.224227	0.335734	0.430901	-0.07366	0.327846	-0.18845	0.391294	-0.18081	-0.44019	0.21324	0.212412	0.285774	-0.23167	-0.44434	-0.37294	-0.24414	-0.22467	-0.34365	-0.03806	-0.28151	0.002293	-0.38628	-0.70226	-0.41652	-0.35109	-0.3711	-0.46563	-0.30858	-0.0744	-0.70418	-0.77321	-0.5654	-0.457	-0.84309	-0.55543	-0.13112	-0.77979
1.93444	1.25406	1.76369	1.34326	1.16886	1.01418	0.675841	1.3889	0.351259	0.333692	0.119848	0.556461	0.477013	0.202874	0.363559	0.154392	-0.03951	0.295961	-0.20034	0.400655	-0.09432	-0.44302	0.125923	0.158014	0.14056	-0.27483	-0.44408	-0.34459	-0.22033	-0.16021	-0.39487	-0.03742	-0.28304	-0.01973	-0.34231	-0.78032	-0.38123	-0.30469	-0.28501	-0.42818	-0.32331	-0.09459	-0.72315	-0.80543	-0.53622	-0.46762	-0.87552	-0.46681	-0.13363	-0.78018
1.94263	1.21343	1.72982	1.30446	1.21632	0.944985	0.62926	1.35493	0.308974	0.305563	0.067927	0.53559	0.53085	0.16414	0.332541	-0.0212	0.002942	0.361961	-0.26472	0.43426	-0.03573	-0.42948	0.169218	0.135486	0.071823	-0.18178	-0.43392	-0.34595	-0.25589	-0.10873	-0.3825	-0.04249	-0.27664	0.001123	-0.32343	-0.68827	-0.42002	-0.26142	-0.17405	-0.42509	-0.32884	-0.09846	-0.76856	-0.75752	-0.50649	-0.47717	-0.86256	-0.51205	-0.17104	-0.75144
1.92487	1.1879	1.74694	1.33297	1.2074	0.897166	0.588173	1.36005	0.297644	0.325474	0.00211	0.628904	0.497462	0.116141	0.294457	-0.0191	0.009111	0.364271	-0.26826	0.427918	-0.00645	-0.4484	0.175572	0.10151	-0.00344	-0.13103	-0.41511	-0.42828	-0.23115	-0.04042	-0.39705	-0.0516	-0.27615	0.024136	-0.26806	-0.69039	-0.53281	-0.22993	-0.01013	-0.424	-0.33726	-0.12137	-0.78039	-0.73894	-0.48297	-0.49934	-0.81997	-0.43067	-0.10869	-0.70489
1.8934	1.13762	1.67322	1.34335	1.18136	0.836951	0.577971	1.25179	0.263632	0.460245	-0.03672	0.63426	0.514761	0.102449	0.254803	-0.06323	0.01557	0.359089	-0.25396	0.471124	-0.00616	-0.38876	0.204894	0.114252	0.017286	-0.08568	-0.34233	-0.50853	-0.26688	-0.01063	-0.40874	-0.05645	-0.26669	0.09051	-0.19497	-0.59357	-0.60154	-0.1685	-0.05175	-0.46569	-0.35701	-0.12106	-0.77855	-0.69772	-0.46457	-0.51979	-0.80708	-0.50231	-0.05841	-0.67375
1.82339	1.06974	1.63869	1.38373	1.1215	0.848027	0.588003	1.2101	0.206519	0.520139	-0.05526	0.609304	0.408722	0.078707	0.262462	-0.07024	0.035589	0.303707	-0.21276	0.403177	0.006288	-0.33046	0.101574	0.164463	0.016914	-0.12417	-0.27208	-0.54755	-0.25941	-0.10168	-0.47285	-0.07745	-0.20815	0.131622	-0.10634	-0.60672	-0.60085	-0.14999	-0.00572	-0.47545	-0.34617	-0.135	-0.79469	-0.66501	-0.44047	-0.53358	-0.84206	-0.50075	-0.01993	-0.60998
1.79234	1.029	1.60128	1.36719	1.08125	0.841412	0.565315	1.08092	0.093839	0.499771	-0.06106	0.54481	0.341368	0.08941	0.268511	-0.29538	0.03765	0.299955	-0.17002	0.408372	0.048678	-0.36246	0.080516	0.211624	0.020684	-0.26253	-0.23122	-0.512	-0.22818	-0.07091	-0.44667	-0.10917	-0.18566	0.084742	-0.11698	-0.64569	-0.55713	-0.18316	-0.0541	-0.43672	-0.36445	-0.10784	-0.78724	-0.65036	-0.4394	-0.53734	-0.85311	-0.54811	-0.06491	-0.64868
1.74959	1.00602	1.57406	1.33312	1.05925	0.769593	0.501657	1.11241	0.097771	0.439419	0.034737	0.538392	0.309624	0.090975	0.32887	-0.4041	0.027457	0.266243	-0.11	0.566333	0.110635	-0.43565	0.027903	0.231678	-0.04221	-0.3369	-0.21839	-0.52751	-0.1276	-0.02969	-0.39403	-0.11814	-0.17654	0.099885	-0.14099	-0.61006	-0.51398	-0.19564	0.017193	-0.38048	-0.38048	-0.07423	-0.7772	-0.63538	-0.41718	-0.5307	-0.87103	-0.57603	-0.08545	-0.69186
1.71986	0.992056	1.53429	1.27161	1.0519	0.715687	0.423849	1.13765	0.12183	0.404979	0.132561	0.508969	0.335026	0.065912	0.398931	-0.30701	0.004963	0.3207	0.001975	0.554133	0.074193	-0.50642	0.066412	0.273168	-0.07261	-0.38931	-0.23704	-0.51845	-0.10907	0.171699	-0.39757	-0.13065	-0.20169	0.073657	-0.22138	-0.61757	-0.44261	-0.22075	-0.03859	-0.32648	-0.37796	-0.0627	-0.73026	-0.63504	-0.44109	-0.54636	-0.87755	-0.53752	-0.07166	-0.75692
1.67362	0.916602	1.41523	1.19344	1.01911	0.696554	0.315767	1.13529	0.197863	0.449596	0.152482	0.446568	0.360728	0.042637	0.495844	-0.11987	-0.00474	0.356717	0.058021	0.376061	0.026159	-0.44626	-0.0025	0.240461	-0.03046	-0.36634	-0.18771	-0.52959	-0.10481	0.221611	-0.42452	-0.11841	-0.20224	0.13269	-0.19426	-0.5996	-0.37613	-0.24326	0.000449	-0.27843	-0.34452	-0.09025	-0.71827	-0.61065	-0.4478	-0.56308	-0.84514	-0.50158	-0.06826	-0.76766
1.67894	0.851923	1.3719	1.19574	0.960763	0.67507	0.277305	1.14474	0.186618	0.436544	0.143602	0.44073	0.294252	-0.02489	0.545248	0.131784	-0.04229	0.480912	0.076671	0.172357	-0.07057	-0.39177	-0.00731	0.177708	-0.03517	-0.31902	-0.15676	-0.5464	-0.17087	0.25726	-0.45401	-0.11374	-0.15723	0.116495	-0.19889	-0.77426	-0.35174	-0.28928	-0.02476	-0.20842	-0.299	-0.09971	-0.65705	-0.58773	-0.43804	-0.57707	-0.8541	-0.43764	-0.04141	-0.74761
1.65781	0.837787	1.33511	1.18586	0.939246	0.623119	0.284157	1.14137	0.188356	0.322975	0.160512	0.441843	0.322547	-0.01889	0.537867	0.041681	-0.03236	0.473001	0.010149	0.250661	-0.046	-0.28108	-0.05459	0.0605	-0.11918	-0.18325	-0.13485	-0.59488	-0.18951	0.17705	-0.43887	-0.09041	-0.13829	0.135703	-0.15875	-0.67792	-0.4208	-0.29253	0.034507	-0.19002	-0.29909	-0.10563	-0.62078	-0.59611	-0.39371	-0.58679	-0.81434	-0.41727	-0.01952	-0.68624
1.61448	0.838674	1.3196	1.12217	0.917713	0.643118	0.326623	1.15599	0.198258	0.16704	0.210234	0.440966	0.294198	-0.03113	0.53772	-0.09009	-0.04891	0.466184	-0.02757	0.363711	0.00868	-0.24601	-0.05567	-0.01976	-0.26807	-0.09837	-0.17559	-0.69177	-0.2125	0.255148	-0.4929	-0.09222	-0.11728	0.087534	-0.21286	-0.69602	-0.47609	-0.30761	0.024859	-0.19379	-0.32014	-0.09903	-0.56357	-0.56575	-0.36292	-0.60008	-0.86418	-0.41754	0.045199	-0.65557
1.56103	0.865495	1.27774	1.01879	0.905512	0.66336	0.2602	1.11662	0.176033	0.099772	0.192838	0.396064	0.325231	0.020047	0.528886	-0.23088	-0.00137	0.488781	-0.01919	0.44447	0.088209	-0.18134	-0.07273	-0.03151	-0.27033	0.003778	-0.13862	-0.728	-0.2679	0.259179	-0.52711	-0.07427	-0.10537	0.064229	-0.21978	-0.646	-0.5067	-0.31674	0.041452	-0.21657	-0.32036	-0.11244	-0.57221	-0.52717	-0.35407	-0.58808	-0.84703	-0.43134	0.071105	-0.59851
1.54978	0.84072	1.2337	0.971884	0.869316	0.64137	0.228798	1.06051	0.125057	0.111888	0.16125	0.359863	0.289205	0.061864	0.586947	-0.24094	0.04084	0.567906	0.053226	0.362692	0.093843	-0.16231	-0.03924	-0.06755	-0.27101	0.049098	-0.04861	-0.75673	-0.31622	0.332624	-0.56573	-0.08305	-0.10206	0.032105	-0.21255	-0.83002	-0.48746	-0.33035	-0.0568	-0.25508	-0.34278	-0.11065	-0.55025	-0.44649	-0.3425	-0.58691	-0.83963	-0.4938	0.080109	-0.56865
1.55298	0.830604	1.22494	0.988428	0.832658	0.536179	0.186112	1.05311	0.067898	0.226572	0.109008	0.360698	0.279944	0.138483	0.558303	-0.05263	0.101772	0.575432	0.119495	0.365891	0.04877	-0.08533	0.014037	-0.07462	-0.20942	0.129841	0.031286	-0.71901	-0.35743	0.248543	-0.51003	-0.05584	-0.09966	0.07529	-0.24005	-0.88435	-0.45425	-0.29219	-0.13756	-0.25993	-0.35477	-0.12701	-0.59025	-0.4311	-0.32768	-0.57817	-0.79671	-0.51905	0.049197	-0.49085
1.56484	0.836225	1.19069	1.02246	0.818752	0.477709	0.195388	0.997831	0.014729	0.23001	0.119218	0.360356	0.383529	0.13609	0.553368	0.093496	0.096114	0.469023	0.129919	0.245866	0.014558	-0.08927	0.076971	-0.11113	-0.23769	0.105699	0.050945	-0.69451	-0.28244	0.21859	-0.49581	-0.06068	-0.11137	0.065644	-0.22737	-0.90601	-0.49597	-0.28504	-0.15792	-0.25149	-0.35906	-0.15939	-0.59712	-0.42338	-0.30989	-0.60269	-0.73887	-0.53766	0.030709	-0.47396
1.54777	0.843096	1.17973	1.08202	0.805643	0.438218	0.212722	0.921638	0.030376	0.260546	0.115507	0.397873	0.506411	0.156941	0.562398	0.124816	0.082292	0.392995	0.113282	0.181482	0.068566	-0.04082	0.073391	-0.12094	-0.19824	0.066134	0.053187	-0.67207	-0.24686	0.2521	-0.50519	-0.0666	-0.13922	0.069106	-0.20063	-0.88194	-0.59327	-0.31154	-0.06956	-0.21138	-0.2863	-0.20567	-0.60266	-0.42903	-0.3189	-0.61585	-0.68068	-0.51162	0.037745	-0.48646
1.54363	0.887163	1.16745	1.13029	0.820716	0.3915	0.206828	0.836646	0.009354	0.209985	0.116808	0.417123	0.680241	0.147419	0.663949	-0.02535	0.070766	0.416313	0.094557	0.145383	0.094462	-0.11116	0.006546	-0.12925	-0.25635	0.014122	0.010222	-0.68134	-0.24826	0.284283	-0.49368	-0.06857	-0.12985	0.003237	-0.13848	-0.80517	-0.6999	-0.34475	-0.07805	-0.19229	-0.27767	-0.24301	-0.57988	-0.39084	-0.32827	-0.65171	-0.61174	-0.52134	0.081222	-0.47394
1.53458	0.889562	1.16792	1.14922	0.830248	0.352004	0.215627	0.795618	0.011244	0.184443	0.128376	0.516439	0.617928	0.182428	0.716541	0.015934	0.138577	0.513683	0.138977	0.165602	0.067974	-0.12127	-0.0136	-0.12327	-0.31554	0.082415	-0.04672	-0.70203	-0.31627	0.298624	-0.55425	-0.073	-0.12445	-0.02355	-0.13093	-0.81187	-0.75734	-0.37893	-0.10257	-0.18909	-0.27962	-0.22684	-0.59963	-0.33646	-0.33249	-0.64848	-0.57725	-0.51978	0.121833	-0.45809
1.51081	0.894134	1.04843	1.04219	0.808173	0.310623	0.095873	0.770227	-0.02132	0.111387	0.163383	0.449346	0.650283	0.163052	0.727101	-0.00481	0.183588	0.545345	0.10957	0.232622	0.050427	-0.13533	-0.09692	-0.09594	-0.35544	0.105549	-0.08595	-0.73178	-0.35476	0.283972	-0.63809	-0.09331	-0.06744	-0.00689	-0.12577	-0.72774	-0.71658	-0.36226	-0.1092	-0.15281	-0.34715	-0.2215	-0.60295	-0.33036	-0.3198	-0.66269	-0.62017	-0.5681	0.14359	-0.37017
1.47769	0.837191	0.975667	1.03043	0.792659	0.256649	0.027697	0.754844	0.012226	0.10456	0.197348	0.412162	0.565238	0.107096	0.693532	0.035494	0.210227	0.561295	0.079608	0.262135	0.01966	-0.1134	-0.10644	-0.15015	-0.40438	0.130385	-0.07698	-0.77398	-0.3586	0.223218	-0.74349	-0.07945	-0.06972	0.004612	-0.13098	-0.74376	-0.65812	-0.39869	-0.03734	-0.15803	-0.34621	-0.19515	-0.63923	-0.33133	-0.32331	-0.64814	-0.62695	-0.58966	0.174652	-0.36148
1.48501	0.796261	0.955709	1.00014	0.776732	0.226271	-0.05291	0.735828	-0.01806	0.15429	0.140577	0.370545	0.580078	0.054037	0.63148	-0.05209	0.201906	0.505355	-0.03446	0.180191	0.033175	-0.09456	-0.1599	-0.14215	-0.39549	0.13552	-0.04616	-0.7775	-0.33119	0.11046	-0.71625	-0.01906	-0.01595	0.062845	-0.11264	-0.53532	-0.60645	-0.37882	-0.11881	-0.13475	-0.3785	-0.18668	-0.65713	-0.39401	-0.33291	-0.65407	-0.65392	-0.5531	0.190555	-0.31904
[truncated: 25 more rows]
[truncated: 3 more columns]

## Sheet: Ctrl_cold
1	2	3	4	5	6	7	8	9	10	11	12	13	14	15	16	17	18	19	20	21	22	23	24	25	26	27	28	29	30	31	32	33	34	35	36	37	38	39	40	41	42	43	44	45	46	47	48	49	50
[truncated: 300 more rows]
[truncated: 3 more columns]
