# Supplementary material for: An excitatory lateral hypothalamic circuit orchestrating pain behaviors in mice
Source: eLife. 2021 May 27;10:e66446. doi: 10.7554/eLife.66446 (PMC8159376; doi:10.7554/eLife.66446)
Supplement: Figure 1—source data 2. [file elife-66446-fig1-data2.xlsx]

## Sheet: Ipsilateral
Time bin (min)	1	2	3	4	5	6	7	8	9	10	11	12	13	14	15	16	17	18	19	20	21	22	23	24	25	26	27	28	29	30	31	32	33	34	35	36	37	38	39	40	41	42	43	44	45	46	47	48	49
5	0	19	26	2	0	9	2	1	10	24	45	2	28	21	3	2	22	20	2	41	4	29	10	13	11	35	3	7	8	24	11	6	8	2	17	3	27	14	5	10	29	17	14	14	17	16	17	13	13
10	2	10	8	6	12	7	14	0	18	6	16	2	22	14	12	14	25	16	1	37	2	6	9	15	1	45	9	0	3	30	11	5	10	2	14	18	6	3	4	12	12	4	16	9	2	4	13	15	36
15	12	16	12	6	5	13	7	4	11	30	17	17	12	17	8	15	25	4	5	33	4	12	11	14	1	26	5	9	31	42	8	10	6	12	16	18	4	2	0	8	1	1	15	5	2	8	7	9	30
20	0	20	12	14	2	10	4	4	18	18	13	23	5	13	5	8	19	7	6	41	8	16	8	3	1	31	3	4	2	13	7	2	6	3	5	13	11	10	4	8	13	8	10	10	7	7	21	15	23
25	3	19	22	24	1	2	4	3	22	17	19	13	12	18	1	3	29	17	0	51	4	7	7	3	0	26	3	0	4	8	8	4	2	10	16	14	6	6	0	3	13	4	19	3	7	13	12	8	11
30	0	11	13	4	3	5	4	1	10	6	22	6	13	7	0	12	7	10	0	36	0	14	4	3	2	28	2	4	5	6	2	0	2	9	12	19	7	4	0	12	13	5	15	7	4	9	8	10	21
35	0	11	15	11	13	15	7	4	26	51	7	12	20	38	3	12	32	8	5	30	15	9	10	5	3	25	1	0	4	7	1	0	0	6	20	7	9	4	0	2	3	4	13	2	4	8	7	7	13
40	5	0	7	2	1	11	3	2	14	9	31	14	5	4	0	13	7	0	9	26	3	6	10	12	1	23	7	1	8	6	8	0	0	1	12	12	10	5	4	6	11	6	9	4	5	11	9	7	21
45	2	1	13	4	10	9	2	10	15	31	25	5	9	16	2	8	8	1	5	23	9	11	10	13	8	27	3	1	13	12	1	0	0	1	17	9	8	4	2	6	7	6	11	9	5	10	8	3	19
[truncated: 18 more columns]

## Sheet: Contralateral
Time bin (min)	1	2	3	4	5	6	7	8	9	10	11	12	13	14	15	16	17	18	19	20	21	22	23	24	25	26	27	28	29	30	31	32	33	34	35	36	37	38	39	40	41	42	43	44	45	46	47	48	49
5	6	19	17	16	11	6	59	15	12	13	27	30	7	26	4	16	14	10	2	14	11	9	37	15	37	15	6	18	4	3	13	8	8	14	5	16	20	21	1	13	8	42	17	24	6	8	10	12	6
10	0	27	11	3	14	6	29	7	0	8	19	29	2	16	2	16	2	3	3	7	13	6	3	6	51	12	8	4	1	3	2	15	10	6	8	13	22	11	0	23	6	23	15	19	13	18	5	2	16
15	21	19	8	20	12	4	61	31	46	22	6	7	32	34	6	14	5	8	10	11	18	1	6	9	27	21	17	36	4	10	6	9	16	10	3	18	18	20	3	10	26	2	33	15	6	14	0	8	15
20	14	38	7	14	5	9	55	32	30	10	6	4	23	22	3	8	22	3	4	12	10	3	12	7	13	10	8	6	1	13	7	5	9	13	5	3	23	20	9	7	19	7	30	23	7	8	5	6	14
25	8	31	14	13	14	3	37	18	14	15	19	15	7	14	5	10	24	4	3	9	7	1	14	4	37	3	3	3	2	8	2	4	16	9	3	8	19	19	6	7	5	14	28	31	4	11	3	9	15
30	5	33	20	11	6	8	32	8	9	4	31	20	4	29	3	12	5	2	5	10	3	11	5	0	19	1	8	15	13	4	4	6	12	12	4	8	12	18	5	5	11	13	26	23	7	8	8	5	11
35	3	29	8	3	2	1	47	13	17	16	28	22	9	35	4	2	1	1	5	7	8	6	9	1	28	0	2	5	1	2	5	5	13	4	4	3	12	22	6	7	6	10	31	15	7	11	2	4	15
40	3	27	1	0	19	20	25	8	16	5	9	8	16	29	8	8	8	17	8	10	10	3	4	3	16	5	4	12	3	9	9	5	7	4	3	4	17	12	4	7	6	15	24	15	5	9	5	12	10
45	3	22	9	1	3	6	13	5	24	17	9	24	17	12	15	7	4	1	12	13	8	3	9	12	23	8	4	8	3	2	3	9	5	2	6	5	20	24	6	13	6	8	25	22	5	15	0	8	8
[truncated: 2 more columns]

## Sheet: No_injection
Time bin (min)	1	2	3	4	5	6	7	8	9	10	11	12	13	14	15	16	17	18	19	20	21	22	23	24	25	26	27	28	29	30	31	32	33	34	35	36	37	38	39	40	41	42	43	44	45	46
5	2	2	11	19	13	16	8	16	18	10	27	22	18	10	8	11	27	8	16	2	7	5	5	7	4	4	4	1	3	1	8	1	4	15	15	0	2	15	11	17	16	13	4	8	11	18
10	11	13	15	6	1	16	11	2	10	5	32	15	5	14	8	10	28	8	13	6	3	7	10	27	3	4	4	3	14	5	6	15	9	12	7	2	8	6	11	16	8	2	14	3	4	6
15	7	13	17	10	1	9	4	10	4	8	14	1	17	14	12	19	16	1	8	10	4	25	6	26	7	0	0	4	11	0	6	7	4	7	5	2	3	16	18	7	10	2	6	5	1	5
20	11	12	20	8	12	5	9	2	3	2	17	17	9	9	7	9	14	4	6	5	2	10	7	9	10	0	8	14	23	6	8	14	10	3	15	10	6	13	20	10	10	8	12	9	11	9
25	0	1	12	7	13	14	20	7	9	4	14	15	9	19	3	10	15	14	18	2	2	13	8	11	7	1	1	4	7	3	2	5	3	12	8	4	3	15	11	2	5	1	9	4	2	1
30	2	6	5	19	7	9	7	4	4	4	30	4	5	14	7	10	11	2	9	2	0	6	6	13	3	1	2	3	3	0	12	3	2	1	18	4	13	10	20	17	8	15	3	14	17	12
35	1	4	10	15	2	6	1	2	7	4	18	4	8	7	9	12	15	5	14	6	2	11	2	16	2	0	8	7	10	7	3	8	10	13	12	8	9	6	15	7	6	1	5	7	0	3
40	7	9	5	12	3	6	8	1	5	0	7	10	5	13	1	6	21	5	20	2	10	7	3	32	1	0	1	7	12	1	1	6	2	11	7	4	3	10	4	9	7	4	7	3	4	3
45	1	6	9	11	10	14	6	4	7	1	16	2	5	9	1	4	22	8	15	4	17	3	6	18	3	9	2	3	6	1	7	9	2	9	7	10	1	9	21	4	12	4	10	14	2	2
